# Supplementary material for: Virus-induced transposable element expression up-regulation in human and mouse host cells
Source: Life Sci Alliance. 2020 Jan 21;3(2):e201900536. doi: 10.26508/lsa.201900536 (PMC6977392; doi:10.26508/lsa.201900536)
Supplement: Supplementary file 1 [file LSA-2019-00536_TableS1.xlsx]

## Sheet: Table S1 - human
Virus	Virus abbreviation	species infected	Sample_name	Sample_files	Study	Sample description	cell type	infection status	method	host genome	virus genome	Family	Genus	Virus classification	Reference	Read length (bp)	Paired/single end read	Sequencer
Dengue Fever Virus	DFV	Homo sapiens	inf_1	SRX3686898	GSE110512	huh-7.5 cells infected with DENV2 16681 for 18h	huh-7.5	infected	poly(A) selection	hg38	KY672955.1	Flaviviridae	Flavivirus	(+) ssRNA	Shah et al., 2018	51	single	Illumina HiSeq 4000
Dengue Fever Virus	DFV	Homo sapiens	inf_2	SRX3686899	GSE110512	huh-7.5 cells infected with DENV2 16681 for 18h	huh-7.5	infected	poly(A) selection	hg38	KY672955.1	Flaviviridae	Flavivirus	(+) ssRNA	Shah et al., 2018	51	single	Illumina HiSeq 4000
Dengue Fever Virus	DFV	Homo sapiens	inf_3	SRX3686900	GSE110512	huh-7.5 cells infected with DENV2 16681 for 18h	huh-7.5	infected	poly(A) selection	hg38	KY672955.1	Flaviviridae	Flavivirus	(+) ssRNA	Shah et al., 2018	51	single	Illumina HiSeq 4000
Dengue Fever Virus	DFV	Homo sapiens	mock_1	SRX3686895	GSE110512	mock-infected huh-7.5 cells collected at 18h	huh-7.5	uninfected	poly(A) selection	hg38	KY672955.1	Flaviviridae	Flavivirus	(+) ssRNA	Shah et al., 2018	51	single	Illumina HiSeq 4000
Dengue Fever Virus	DFV	Homo sapiens	mock_2	SRX3686896	GSE110512	mock-infected huh-7.5 cells collected at 18h	huh-7.5	uninfected	poly(A) selection	hg38	KY672955.1	Flaviviridae	Flavivirus	(+) ssRNA	Shah et al., 2018	51	single	Illumina HiSeq 4000
Dengue Fever Virus	DFV	Homo sapiens	mock_3	SRX3686897	GSE110512	mock-infected huh-7.5 cells collected at 18h	huh-7.5	uninfected	poly(A) selection	hg38	KY672955.1	Flaviviridae	Flavivirus	(+) ssRNA	Shah et al., 2018	51	single	Illumina HiSeq 4000
Ebola Virus	EBOVarpe19	Homo Sapians	inf_1	SRR5807539,SRR5807540,SRR5807541,SRR5807542	GSE100839	ARPE-19 cells 24 h post EBOV infection	ARPE-19	infected	ribosomal RNA depletion	hg38	MG572234.1	Filoviridae	Ebolavirus	(-) ssRNA	Smith et al., 2017	75	paired, but used single	Illumina NextSeq 500
Ebola Virus	EBOVarpe19	Homo Sapians	inf_2	SRR5807543,SRR5807544,SRR5807545,SRR5807546	GSE100839	ARPE-19 cells 24 h post EBOV infection	ARPE-19	infected	ribosomal RNA depletion	hg38	MG572234.1	Filoviridae	Ebolavirus	(-) ssRNA	Smith et al., 2017	75	paired, but used single	Illumina NextSeq 500
Ebola Virus	EBOVarpe19	Homo Sapians	inf_3	SRR5807547,SRR5807548,SRR5807549,SRR5807550	GSE100839	ARPE-19 cells 24 h post EBOV infection	ARPE-19	infected	ribosomal RNA depletion	hg38	MG572234.1	Filoviridae	Ebolavirus	(-) ssRNA	Smith et al., 2017	75	paired, but used single	Illumina NextSeq 500
Ebola Virus	EBOVarpe19	Homo Sapians	mock_1	SRR5807527,SRR5807528,SRR5807529,SRR5807530	GSE100839	ARPE-19 cells 24 h post mock infection	ARPE-19	uninfected	ribosomal RNA depletion	hg38	MG572234.1	Filoviridae	Ebolavirus	(-) ssRNA	Smith et al., 2017	75	paired, but used single	Illumina NextSeq 500
Ebola Virus	EBOVarpe19	Homo Sapians	mock_2	SRR5807531,SRR5807532,SRR5807533,SRR5807534	GSE100839	ARPE-19 cells 24 h post mock infection	ARPE-19	uninfected	ribosomal RNA depletion	hg38	MG572234.1	Filoviridae	Ebolavirus	(-) ssRNA	Smith et al., 2017	75	paired, but used single	Illumina NextSeq 500
Ebola Virus	EBOVarpe19	Homo Sapians	mock_3	SRR5807535,SRR5807536,SRR5807537,SRR5807538	GSE100839	ARPE-19 cells 24 h post mock infection	ARPE-19	uninfected	ribosomal RNA depletion	hg38	MG572234.1	Filoviridae	Ebolavirus	(-) ssRNA	Smith et al., 2017	75	paired, but used single	Illumina NextSeq 500
Ebola Virus	EBOVTcell	Homo Sapians	inf_1	SRX2867359	GSE99389	CD4+ T cells 4 d post EBOV infection	CD4+ T cells	infected	poly(A) selection	hg38	MG572234.1	Filoviridae	Ebolavirus	(-) ssRNA	Iampietro et al., 2017	75	paired, but used single	Illumina NextSeq 500
Ebola Virus	EBOVTcell	Homo Sapians	inf_2	SRX2867365	GSE99389	CD4+ T cells 4 d post EBOV infection	CD4+ T cells	infected	poly(A) selection	hg38	MG572234.1	Filoviridae	Ebolavirus	(-) ssRNA	Iampietro et al., 2017	75	paired, but used single	Illumina NextSeq 500
Ebola Virus	EBOVTcell	Homo Sapians	inf_3	SRX2867371	GSE99389	CD4+ T cells 4 d post EBOV infection	CD4+ T cells	infected	poly(A) selection	hg38	MG572234.1	Filoviridae	Ebolavirus	(-) ssRNA	Iampietro et al., 2017	75	paired, but used single	Illumina NextSeq 500
Ebola Virus	EBOVTcell	Homo Sapians	inf_4	SRX2867377	GSE99389	CD4+ T cells 4 d post EBOV infection	CD4+ T cells	infected	poly(A) selection	hg38	MG572234.1	Filoviridae	Ebolavirus	(-) ssRNA	Iampietro et al., 2017	75	paired, but used single	Illumina NextSeq 500
Ebola Virus	EBOVTcell	Homo Sapians	mock_1	SRX2867363	GSE99389	CD4+ T cells 4 d post mock infection	CD4+ T cells	uninfected	poly(A) selection	hg38	MG572234.1	Filoviridae	Ebolavirus	(-) ssRNA	Iampietro et al., 2017	75	paired, but used single	Illumina NextSeq 500
Ebola Virus	EBOVTcell	Homo Sapians	mock_2	SRX2867369	GSE99389	CD4+ T cells 4 d post mock infection	CD4+ T cells	uninfected	poly(A) selection	hg38	MG572234.1	Filoviridae	Ebolavirus	(-) ssRNA	Iampietro et al., 2017	75	paired, but used single	Illumina NextSeq 500
Ebola Virus	EBOVTcell	Homo Sapians	mock_3	SRX2867375	GSE99389	CD4+ T cells 4 d post mock infection	CD4+ T cells	uninfected	poly(A) selection	hg38	MG572234.1	Filoviridae	Ebolavirus	(-) ssRNA	Iampietro et al., 2017	75	paired, but used single	Illumina NextSeq 500
Ebola Virus	EBOVTcell	Homo Sapians	mock_4	SRX2867381	GSE99389	CD4+ T cells 4 d post mock infection	CD4+ T cells	uninfected	poly(A) selection	hg38	MG572234.1	Filoviridae	Ebolavirus	(-) ssRNA	Iampietro et al., 2017	75	paired, but used single	Illumina NextSeq 500
Ebolavirus Zaire	EBOVmdm	Homo sapiens	inf_1	SRX1911571	GSE84188	MDM infected with EBOV, 48 hpi	primary monocyte derived macrophages	infected	polyA selection	hg38	MG572234.1	Filoviridae	Ebolavirus	(-) ssRNA	Olenjnik et al., 2017	75	single	Illumina NextSeq 500
Ebolavirus Zaire	EBOVmdm	Homo sapiens	inf_2	SRX1911585	GSE84188	MDM infected with EBOV, 48 hpi	primary monocyte derived macrophages	infected	polyA selection	hg38	MG572234.1	Filoviridae	Ebolavirus	(-) ssRNA	Olenjnik et al., 2017	75	single	Illumina NextSeq 500
Ebolavirus Zaire	EBOVmdm	Homo sapiens	inf_3	SRX1911599	GSE84188	MDM infected with EBOV, 48 hpi	primary monocyte derived macrophages	infected	polyA selection	hg38	MG572234.1	Filoviridae	Ebolavirus	(-) ssRNA	Olenjnik et al., 2017	75	single	Illumina NextSeq 500
Ebolavirus Zaire	EBOVmdm	Homo sapiens	mock_1	SRX1911569	GSE84188	uninfected MDMs	primary monocyte derived macrophages	uninfected	polyA selection	hg38	MG572234.1	Filoviridae	Ebolavirus	(-) ssRNA	Olenjnik et al., 2017	75	single	Illumina NextSeq 500
Ebolavirus Zaire	EBOVmdm	Homo sapiens	mock_2	SRX1911583	GSE84188	uninfected MDMs	primary monocyte derived macrophages	uninfected	polyA selection	hg38	MG572234.1	Filoviridae	Ebolavirus	(-) ssRNA	Olenjnik et al., 2017	75	single	Illumina NextSeq 500
Ebolavirus Zaire	EBOVmdm	Homo sapiens	mock_3	SRX1911597	GSE84188	uninfected MDMs	primary monocyte derived macrophages	uninfected	polyA selection	hg38	MG572234.1	Filoviridae	Ebolavirus	(-) ssRNA	Olenjnik et al., 2017	75	single	Illumina NextSeq 500
Human Herpes Virus 4 (Epstein Barr)	EBV	Homo sapiens	inf_1	SRX5358457	GSE126379	HHV-4-infected B cells in latency III stage	CD19+ B cells	infected		hg38	NC_007605.1	Herpesviridae	Lymphocryptovirus	dsDNA	Afrasiabi et al., 2019	50	single	Illumina HiSeq 2500
Human Herpes Virus 4 (Epstein Barr)	EBV	Homo sapiens	inf_2	SRX5358458	GSE126379	HHV-4-infected B cells in latency III stage	CD19+ B cells	infected		hg38	NC_007605.1	Herpesviridae	Lymphocryptovirus	dsDNA	Afrasiabi et al., 2019	50	single	Illumina HiSeq 2500
Human Herpes Virus 4 (Epstein Barr)	EBV	Homo sapiens	inf_3	SRX5358459	GSE126379	HHV-4-infected B cells in latency III stage	CD19+ B cells	infected		hg38	NC_007605.1	Herpesviridae	Lymphocryptovirus	dsDNA	Afrasiabi et al., 2019	50	single	Illumina HiSeq 2500
Human Herpes Virus 4 (Epstein Barr)	EBV	Homo sapiens	inf_4	SRX5358460	GSE126379	HHV-4-infected B cells in latency III stage	CD19+ B cells	infected		hg38	NC_007605.1	Herpesviridae	Lymphocryptovirus	dsDNA	Afrasiabi et al., 2019	50	single	Illumina HiSeq 2500
Human Herpes Virus 4 (Epstein Barr)	EBV	Homo sapiens	inf_5	SRX5358461	GSE126379	HHV-4-infected B cells in latency III stage	CD19+ B cells	infected		hg38	NC_007605.1	Herpesviridae	Lymphocryptovirus	dsDNA	Afrasiabi et al., 2019	50	single	Illumina HiSeq 2500
Human Herpes Virus 4 (Epstein Barr)	EBV	Homo sapiens	mock_1	SRX5358452	GSE126379	uninfected CD19+ B cells	CD19+ B cells	mock		hg38	NC_007605.1	Herpesviridae	Lymphocryptovirus	dsDNA	Afrasiabi et al., 2019	50	single	Illumina HiSeq 2500
Human Herpes Virus 4 (Epstein Barr)	EBV	Homo sapiens	mock_2	SRX5358453	GSE126379	uninfected CD19+ B cells	CD19+ B cells	mock		hg38	NC_007605.1	Herpesviridae	Lymphocryptovirus	dsDNA	Afrasiabi et al., 2019	50	single	Illumina HiSeq 2500
Human Herpes Virus 4 (Epstein Barr)	EBV	Homo sapiens	mock_3	SRX5358454	GSE126379	uninfected CD19+ B cells	CD19+ B cells	mock		hg38	NC_007605.1	Herpesviridae	Lymphocryptovirus	dsDNA	Afrasiabi et al., 2019	50	single	Illumina HiSeq 2500
Human Herpes Virus 4 (Epstein Barr)	EBV	Homo sapiens	mock_4	SRX5358455	GSE126379	uninfected CD19+ B cells	CD19+ B cells	mock		hg38	NC_007605.1	Herpesviridae	Lymphocryptovirus	dsDNA	Afrasiabi et al., 2019	50	single	Illumina HiSeq 2500
Human Herpes Virus 4 (Epstein Barr)	EBV	Homo sapiens	mock_5	SRX5358456	GSE126379	uninfected CD19+ B cells	CD19+ B cells	mock		hg38	NC_007605.1	Herpesviridae	Lymphocryptovirus	dsDNA	Afrasiabi et al., 2019	50	single	Illumina HiSeq 2500
Cytomegalovirus	HCMV	Homo sapiens	inf_1	SRX4802682	GSE120890	CMV/AD169 infected MRC5 cells	MRC5	infected	poly(A) selection	hg38	FJ527563.1	Herpesviridae	Cytomegalovirus	dsDNA	Nogalski et al., 2019	101	paired, but used single	Illumina HiSeq 2000
Cytomegalovirus	HCMV	Homo sapiens	inf_2	SRX4802683	GSE120890	CMV/AD169 infected MRC5 cells	MRC5	infected	poly(A) selection	hg38	FJ527563.1	Herpesviridae	Cytomegalovirus	dsDNA	Nogalski et al., 2019	101	paired, but used single	Illumina HiSeq 2000
Cytomegalovirus	HCMV	Homo sapiens	inf_3	SRX4802684	GSE120890	CMV/AD169 infected MRC5 cells	MRC5	infected	poly(A) selection	hg38	FJ527563.1	Herpesviridae	Cytomegalovirus	dsDNA	Nogalski et al., 2019	101	paired, but used single	Illumina HiSeq 2000
Cytomegalovirus	HCMV	Homo sapiens	mock_1	SRX4802679	GSE120890	mock-infected MRC5 cells	MRC5	mock	poly(A) selection	hg38	FJ527563.1	Herpesviridae	Cytomegalovirus	dsDNA	Nogalski et al., 2019	101	paired, but used single	Illumina HiSeq 2000
Cytomegalovirus	HCMV	Homo sapiens	mock_2	SRX4802680	GSE120890	mock-infected MRC5 cells	MRC5	mock	poly(A) selection	hg38	FJ527563.1	Herpesviridae	Cytomegalovirus	dsDNA	Nogalski et al., 2019	101	paired, but used single	Illumina HiSeq 2000
Cytomegalovirus	HCMV	Homo sapiens	mock_3	SRX4802681	GSE120890	mock-infected MRC5 cells	MRC5	mock	poly(A) selection	hg38	FJ527563.1	Herpesviridae	Cytomegalovirus	dsDNA	Nogalski et al., 2019	101	paired, but used single	Illumina HiSeq 2000
Hepatitis C Virus	HCV	Homo Sapians	inf_1	SRX3178428	GSE103730	huh-7.5 cells infects with HCV	huh-7.5	infected	poly(A) selection	hg38	NC_004102.1	Flaviviridae	Hepacivirus	(+) ssRNA	Perez et al., 2019	99	single	Illumina HiSeq 2500
Hepatitis C Virus	HCV	Homo Sapians	inf_2	SRX3178430	GSE103730	huh-7.5 cells infects with HCV	huh-7.5	infected	poly(A) selection	hg38	NC_004102.1	Flaviviridae	Hepacivirus	(+) ssRNA	Perez et al., 2019	99	single	Illumina HiSeq 2500
Hepatitis C Virus	HCV	Homo Sapians	inf_3	SRX3178432	GSE103730	huh-7.5 cells infects with HCV	huh-7.5	infected	poly(A) selection	hg38	NC_004102.1	Flaviviridae	Hepacivirus	(+) ssRNA	Perez et al., 2019	99	single	Illumina HiSeq 2500
Hepatitis C Virus	HCV	Homo Sapians	inf_4	SRX3178434	GSE103730	huh-7.5 cells infects with HCV	huh-7.5	infected	poly(A) selection	hg38	NC_004102.1	Flaviviridae	Hepacivirus	(+) ssRNA	Perez et al., 2019	99	single	Illumina HiSeq 2500
Hepatitis C Virus	HCV	Homo Sapians	inf_5	SRX3178436	GSE103730	huh-7.5 cells infects with HCV	huh-7.5	infected	poly(A) selection	hg38	NC_004102.1	Flaviviridae	Hepacivirus	(+) ssRNA	Perez et al., 2019	99	single	Illumina HiSeq 2500
Hepatitis C Virus	HCV	Homo Sapians	mock_1	SRX3178429	GSE103730	mock infected huh-7.5 cells	huh-7.5	uninfected	poly(A) selection	hg38	NC_004102.1	Flaviviridae	Hepacivirus	(+) ssRNA	Perez et al., 2019	99	single	Illumina HiSeq 2500
Hepatitis C Virus	HCV	Homo Sapians	mock_2	SRX3178431	GSE103730	mock infected huh-7.5 cells	huh-7.5	uninfected	poly(A) selection	hg38	NC_004102.1	Flaviviridae	Hepacivirus	(+) ssRNA	Perez et al., 2019	99	single	Illumina HiSeq 2500
Hepatitis C Virus	HCV	Homo Sapians	mock_3	SRX3178433	GSE103730	mock infected huh-7.5 cells	huh-7.5	uninfected	poly(A) selection	hg38	NC_004102.1	Flaviviridae	Hepacivirus	(+) ssRNA	Perez et al., 2019	99	single	Illumina HiSeq 2500
Hepatitis C Virus	HCV	Homo Sapians	mock_4	SRX3178435	GSE103730	mock infected huh-7.5 cells	huh-7.5	uninfected	poly(A) selection	hg38	NC_004102.1	Flaviviridae	Hepacivirus	(+) ssRNA	Perez et al., 2019	99	single	Illumina HiSeq 2500
Hepatitis C Virus	HCV	Homo Sapians	mock_5	SRX3178437	GSE103730	mock infected huh-7.5 cells	huh-7.5	uninfected	poly(A) selection	hg38	NC_004102.1	Flaviviridae	Hepacivirus	(+) ssRNA	Perez et al., 2019	99	single	Illumina HiSeq 2500
Human Herpes Virus 8	KSHVmc116	Homo sapiens	MC116_inf_1	SRX4650544	GSE119608	MC116 infected with HHV-8	MC116	infected	ribosomal RNA depletion	hg38	AF148805.2	Herpesviridae	Rhadinovirus	dsDNA	Tagawa et al. 2018	126	paired, but used single	Illumina HiSeq 2500
Human Herpes Virus 8	KSHVmc116	Homo sapiens	MC116_inf_2	SRX4650545	GSE119608	MC116 infected with HHV-8	MC116	infected	ribosomal RNA depletion	hg38	AF148805.2	Herpesviridae	Rhadinovirus	dsDNA	Tagawa et al. 2018	126	paired, but used single	Illumina HiSeq 2500
Human Herpes Virus 8	KSHVmc116	Homo sapiens	MC116_inf_3	SRX4650546	GSE119608	MC116 infected with HHV-8	MC116	infected	ribosomal RNA depletion	hg38	AF148805.2	Herpesviridae	Rhadinovirus	dsDNA	Tagawa et al. 2018	126	paired, but used single	Illumina HiSeq 2500
Human Herpes Virus 8	KSHVmc116	Homo sapiens	MC116_mock_1	SRX4650541	GSE119608	mock-infected MC116 cells	MC116	uninfected	ribosomal RNA depletion	hg38	AF148805.2	Herpesviridae	Rhadinovirus	dsDNA	Tagawa et al. 2018	126	paired, but used single	Illumina HiSeq 2500
Human Herpes Virus 8	KSHVmc116	Homo sapiens	MC116_mock_2	SRX4650542	GSE119608	mock-infected MC116 cells	MC116	uninfected	ribosomal RNA depletion	hg38	AF148805.2	Herpesviridae	Rhadinovirus	dsDNA	Tagawa et al. 2018	126	paired, but used single	Illumina HiSeq 2500
Human Herpes Virus 8	KSHVmc116	Homo sapiens	MC116_mock_3	SRX4650543	GSE119608	mock-infected MC116 cells	MC116	uninfected	ribosomal RNA depletion	hg38	AF148805.2	Herpesviridae	Rhadinovirus	dsDNA	Tagawa et al. 2018	126	paired, but used single	Illumina HiSeq 2500
Human Herpes Virus 8	KSHVhuvec	Homo sapiens	HUVEC_inf_1	SRX4650555	GSE119608	HUVEC infected with HHV-8	HUVEC	infected	ribosomal RNA depletion	hg38	AF148805.2	Herpesviridae	Rhadinovirus	dsDNA	Tagawa et al. 2018	126	paired, but used single	Illumina HiSeq 2500
Human Herpes Virus 8	KSHVhuvec	Homo sapiens	HUVEC_inf_2	SRX4650556	GSE119608	HUVEC infected with HHV-8	HUVEC	infected	ribosomal RNA depletion	hg38	AF148805.2	Herpesviridae	Rhadinovirus	dsDNA	Tagawa et al. 2018	126	paired, but used single	Illumina HiSeq 2500
Human Herpes Virus 8	KSHVhuvec	Homo sapiens	HUVEC_mock_1	SRX4650553	GSE119608	mock-infected HUVEC cells	HUVEC	uninfected	ribosomal RNA depletion	hg38	AF148805.2	Herpesviridae	Rhadinovirus	dsDNA	Tagawa et al. 2018	126	paired, but used single	Illumina HiSeq 2500
Human Herpes Virus 8	KSHVhuvec	Homo sapiens	HUVEC_mock_2	SRX4650554	GSE119608	mock-infected HUVEC cells	HUVEC	uninfected	ribosomal RNA depletion	hg38	AF148805.2	Herpesviridae	Rhadinovirus	dsDNA	Tagawa et al. 2018	126	paired, but used single	Illumina HiSeq 2500
Human Immunodeficiency Virus	HIVrest	Homo Sapians	d41.HIVinf.resting	SRX5028402	GSE122735	resting CD4+ T cells infected with HIV	resting CD4+ T cells	infected	ribosomal RNA depletion	hg38	K03455.1	Retroviridae	Lentivirus	retrovirus	Lucic (unpublished)	80	paired, but used single	Illumina NextSeq 500
Human Immunodeficiency Virus	HIVrest	Homo Sapians	d42.HIVinf.resting	SRX5028404	GSE122735	resting CD4+ T cells infected with HIV	resting CD4+ T cells	infected	ribosomal RNA depletion	hg38	K03455.1	Retroviridae	Lentivirus	retrovirus	Lucic (unpublished)	80	paired, but used single	Illumina NextSeq 500
Human Immunodeficiency Virus	HIVrest	Homo Sapians	d44.HIVinf.resting	SRX5028406	GSE122735	resting CD4+ T cells infected with HIV	resting CD4+ T cells	infected	ribosomal RNA depletion	hg38	K03455.1	Retroviridae	Lentivirus	retrovirus	Lucic (unpublished)	80	paired, but used single	Illumina NextSeq 500
Human Immunodeficiency Virus	HIVrest	Homo Sapians	d41.ctrl.resting	SRX5028401	GSE122735	uninfected resting CD4+ T cells	resting CD4+ T cells	uninfected	ribosomal RNA depletion	hg38	K03455.1	Retroviridae	Lentivirus	retrovirus	Lucic (unpublished)	80	paired, but used single	Illumina NextSeq 500
Human Immunodeficiency Virus	HIVrest	Homo Sapians	d42.ctrl.resting	SRX5028403	GSE122735	uninfected resting CD4+ T cells	resting CD4+ T cells	uninfected	ribosomal RNA depletion	hg38	K03455.1	Retroviridae	Lentivirus	retrovirus	Lucic (unpublished)	80	paired, but used single	Illumina NextSeq 500
Human Immunodeficiency Virus	HIVrest	Homo Sapians	d44.ctrl.resting	SRX5028405	GSE122735	uninfected resting CD4+ T cells	resting CD4+ T cells	uninfected	ribosomal RNA depletion	hg38	K03455.1	Retroviridae	Lentivirus	retrovirus	Lucic (unpublished)	80	paired, but used single	Illumina NextSeq 500
Human Immunodeficiency Virus	HIVact	Homo Sapians	d41.HIVinf.activated	SRX5028408	GSE122735	activated CD4+ T cells infected with HIV	activated CD4+ T cells	infected	ribosomal RNA depletion	hg38	K03455.1	Retroviridae	Lentivirus	retrovirus	Lucic (unpublished)	80	paired, but used single	Illumina NextSeq 500
Human Immunodeficiency Virus	HIVact	Homo Sapians	d42.HIVinf.activated	SRX5028410	GSE122735	activated CD4+ T cells infected with HIV	activated CD4+ T cells	infected	ribosomal RNA depletion	hg38	K03455.1	Retroviridae	Lentivirus	retrovirus	Lucic (unpublished)	80	paired, but used single	Illumina NextSeq 500
Human Immunodeficiency Virus	HIVact	Homo Sapians	d44.HIVinf.activated	SRX5028412	GSE122735	activated CD4+ T cells infected with HIV	activated CD4+ T cells	infected	ribosomal RNA depletion	hg38	K03455.1	Retroviridae	Lentivirus	retrovirus	Lucic (unpublished)	80	paired, but used single	Illumina NextSeq 500
Human Immunodeficiency Virus	HIVact	Homo Sapians	d41.ctrl.activated	SRX5028407	GSE122735	uninfected activated CD4+ T cells	activated CD4+ T cells	uninfected	ribosomal RNA depletion	hg38	K03455.1	Retroviridae	Lentivirus	retrovirus	Lucic (unpublished)	80	paired, but used single	Illumina NextSeq 500
Human Immunodeficiency Virus	HIVact	Homo Sapians	d42.ctrl.activated	SRX5028409	GSE122735	uninfected activated CD4+ T cells	activated CD4+ T cells	uninfected	ribosomal RNA depletion	hg38	K03455.1	Retroviridae	Lentivirus	retrovirus	Lucic (unpublished)	80	paired, but used single	Illumina NextSeq 500
Human Immunodeficiency Virus	HIVact	Homo Sapians	d44.ctrl.activated	SRX5028411	GSE122735	uninfected activated CD4+ T cells	activated CD4+ T cells	uninfected	ribosomal RNA depletion	hg38	K03455.1	Retroviridae	Lentivirus	retrovirus	Lucic (unpublished)	80	paired, but used single	Illumina NextSeq 500
Human Papilloma Virus type 16	HPV	Homo sapiens	HPV_1	SRX2431854	GSE92496	Human foreskin keratinocytes infected with HPV	human foreskin keratinocytes	infected	ribosomal RNA depletion	hg38	NC_001526.4	Papillomaviridae	alphapapillomavirus	dsDNA	Harden et al., 2017	100	paired, but used single	Illumina HiSeq 2500
Human Papilloma Virus type 16	HPV	Homo sapiens	HPV_2	SRX2431856	GSE92496	Human foreskin keratinocytes infected with HPV	human foreskin keratinocytes	infected	ribosomal RNA depletion	hg38	NC_001526.4	Papillomaviridae	alphapapillomavirus	dsDNA	Harden et al., 2017	100	paired, but used single	Illumina HiSeq 2500
Human Papilloma Virus type 16	HPV	Homo sapiens	mock_1	SRX2431853	GSE92496	mock-infected Human foreskin keratinocytes	human foreskin keratinocytes	uninfected	ribosomal RNA depletion	hg38	NC_001526.4	Papillomaviridae	alphapapillomavirus	dsDNA	Harden et al., 2017	100	paired, but used single	Illumina HiSeq 2500
Human Papilloma Virus type 16	HPV	Homo sapiens	mock_2	SRX2431855	GSE92496	mock-infected Human foreskin keratinocytes	human foreskin keratinocytes	uninfected	ribosomal RNA depletion	hg38	NC_001526.4	Papillomaviridae	alphapapillomavirus	dsDNA	Harden et al., 2017	100	paired, but used single	Illumina HiSeq 2500
Human respiratory syncytial virus	HRSV	Homo sapiens	inf_1	SRX2855279	GSE99298	A549 cells 96 h post infection with HRSV	A549	infected	poly(A) selection	hg38	NC_038235.1	Pneumoviridae	Orthopneumovirus	(-) ssRNA	Chatterjee et al., 2017	50	single	Illumina HiSeq 2500
Human respiratory syncytial virus	HRSV	Homo sapiens	inf_2	SRX2855280	GSE99298	A549 cells 96 h post infection with HRSV	A549	infected	poly(A) selection	hg38	NC_038235.1	Pneumoviridae	Orthopneumovirus	(-) ssRNA	Chatterjee et al., 2017	50	single	Illumina HiSeq 2500
Human respiratory syncytial virus	HRSV	Homo sapiens	inf_3	SRX2855281	GSE99298	A549 cells 96 h post infection with HRSV	A549	infected	poly(A) selection	hg38	NC_038235.1	Pneumoviridae	Orthopneumovirus	(-) ssRNA	Chatterjee et al., 2017	50	single	Illumina HiSeq 2500
Human respiratory syncytial virus	HRSV	Homo sapiens	mock_1	SRX2855277	GSE99298	mock infected A549 cells	A549	uninfected	poly(A) selection	hg38	NC_038235.1	Pneumoviridae	Orthopneumovirus	(-) ssRNA	Chatterjee et al., 2017	50	single	Illumina HiSeq 2500
Human respiratory syncytial virus	HRSV	Homo sapiens	mock_2	SRX2855278	GSE99298	mock infected A549 cells	A549	uninfected	poly(A) selection	hg38	NC_038235.1	Pneumoviridae	Orthopneumovirus	(-) ssRNA	Chatterjee et al., 2017	50	single	Illumina HiSeq 2500
Herpes Simplex Virus 1 strain 17	HSV-1	Homo sapiens	inf_1	SRX2962096	GSE100576	HFF cells 8 h post HSV-1 infection	Primary human foreskin fibroblasts (HFF)	infected	ribosomal RNA depletion	hg38	NC_001806.2	Herpesviridae	Simplexvirus	dsDNA	Hennig et al., 2018	76	paired, but used single	Illumina NextSeq 500
Herpes Simplex Virus 1 strain 17	HSV-1	Homo sapiens	inf_2	SRX2962101	GSE100576	HFF cells 8 h post HSV-1 infection	Primary human foreskin fibroblasts (HFF)	infected	ribosomal RNA depletion	hg38	NC_001806.2	Herpesviridae	Simplexvirus	dsDNA	Hennig et al., 2018	76	paired, but used single	Illumina NextSeq 500
Herpes Simplex Virus 1 strain 17	HSV-1	Homo sapiens	mock_1	SRX2962092	GSE100576	mock-infected HFF cells	Primary human foreskin fibroblasts (HFF)	uninfected	ribosomal RNA depletion	hg38	NC_001806.2	Herpesviridae	Simplexvirus	dsDNA	Hennig et al., 2018	76	paired, but used single	Illumina NextSeq 500
Herpes Simplex Virus 1 strain 17	HSV-1	Homo sapiens	mock_2	SRX2962100	GSE100576	mock-infected HFF cells	Primary human foreskin fibroblasts (HFF)	uninfected	ribosomal RNA depletion	hg38	NC_001806.2	Herpesviridae	Simplexvirus	dsDNA	Hennig et al., 2018	76	paired, but used single	Illumina NextSeq 500
Influenza A Virus	IAV	Homo sapiens	inf_1	SRX1818914	GSE82232	A549 cells infected with A/Puerto Rico/8/1934 H1N1 after 8h	A549	infected	poly(A) selection	hg38	A/PR/8/34(H1N1)	Orthomyxoviridae	Alphainfluenzavirus	(-) ssRNA	Bercovich-Kinori et al., 2016	51	single	Illumina HiSeq 2000
Influenza A Virus	IAV	Homo sapiens	inf_2	SRX1818918	GSE82232	A549 cells infected with A/Puerto Rico/8/1934 H1N1 after 8h	A549	infected	poly(A) selection	hg38	A/PR/8/34(H1N1)	Orthomyxoviridae	Alphainfluenzavirus	(-) ssRNA	Bercovich-Kinori et al., 2016	51	single	Illumina HiSeq 2000
Influenza A Virus	IAV	Homo sapiens	mock_1	SRX1818911	GSE82232	mock-infected A549 cells	A549	uninfected	poly(A) selection	hg38	A/PR/8/34(H1N1)	Orthomyxoviridae	Alphainfluenzavirus	(-) ssRNA	Bercovich-Kinori et al., 2016	51	single	Illumina HiSeq 2000
Influenza A Virus	IAV	Homo sapiens	mock_2	SRX1818915	GSE82232	mock-infected A549 cells	A549	uninfected	poly(A) selection	hg38	A/PR/8/34(H1N1)	Orthomyxoviridae	Alphainfluenzavirus	(-) ssRNA	Bercovich-Kinori et al., 2016	51	single	Illumina HiSeq 2000
Measles	MeV	Homo sapiens	inf_1	SRX3751260	GSE111247	MeV-infected glioma cells	LNZ308	infected	poly(A) selection	hg38	NC_001498.1	Paramyxoviridae	Morbillivirus	(-) ssRNA	Rajaraman et al., 2019	68	single	Illumina HiSeq 2500
Measles	MeV	Homo sapiens	inf_2	SRX3751261	GSE111247	MeV-infected glioma cells	LNZ308	infected	poly(A) selection	hg38	NC_001498.1	Paramyxoviridae	Morbillivirus	(-) ssRNA	Rajaraman et al., 2019	68	single	Illumina HiSeq 2500
Measles	MeV	Homo sapiens	inf_3	SRX3751262	GSE111247	MeV-infected glioma cells	LNZ308	infected	poly(A) selection	hg38	NC_001498.1	Paramyxoviridae	Morbillivirus	(-) ssRNA	Rajaraman et al., 2019	68	single	Illumina HiSeq 2500
Measles	MeV	Homo sapiens	mock_1	SRX3751266	GSE111247	mock-infected glioma cells	LNZ308	mock	poly(A) selection	hg38	NC_001498.1	Paramyxoviridae	Morbillivirus	(-) ssRNA	Rajaraman et al., 2019	68	single	Illumina HiSeq 2500
Measles	MeV	Homo sapiens	mock_2	SRX3751267	GSE111247	mock-infected glioma cells	LNZ308	mock	poly(A) selection	hg38	NC_001498.1	Paramyxoviridae	Morbillivirus	(-) ssRNA	Rajaraman et al., 2019	68	single	Illumina HiSeq 2500
Measles	MeV	Homo sapiens	mock_3	SRX3751268	GSE111247	mock-infected glioma cells	LNZ308	mock	poly(A) selection	hg38	NC_001498.1	Paramyxoviridae	Morbillivirus	(-) ssRNA	Rajaraman et al., 2019	68	single	Illumina HiSeq 2500
Orf Virus	ORFV	Homo sapiens	inf_1	SRX2468542	GSE93226	HFF-1 cells infected with ORFV	Human foreskin fibroblast cells (HFF-1)	infected	poly(A) selection	hg38	NC_005336.1	Poxviridae	Parapoxvirus	dsDNA	Chen (unpublished)	50	single	Illumina HiSeq 2500
Orf Virus	ORFV	Homo sapiens	inf_2	SRX2468543	GSE93226	HFF-1 cells infected with ORFV	Human foreskin fibroblast cells (HFF-1)	infected	poly(A) selection	hg38	NC_005336.1	Poxviridae	Parapoxvirus	dsDNA	Chen (unpublished)	50	single	Illumina HiSeq 2500
Orf Virus	ORFV	Homo sapiens	inf_3	SRX2468544	GSE93226	HFF-1 cells infected with ORFV	Human foreskin fibroblast cells (HFF-1)	infected	poly(A) selection	hg38	NC_005336.1	Poxviridae	Parapoxvirus	dsDNA	Chen (unpublished)	50	single	Illumina HiSeq 2500
Orf Virus	ORFV	Homo sapiens	mock_1	SRX2468536	GSE93226	mock-infected HFF-1 cells	Human foreskin fibroblast cells (HFF-1)	uninfected	poly(A) selection	hg38	NC_005336.1	Poxviridae	Parapoxvirus	dsDNA	Chen (unpublished)	50	single	Illumina HiSeq 2500
Orf Virus	ORFV	Homo sapiens	mock_2	SRX2468537	GSE93226	mock-infected HFF-1 cells	Human foreskin fibroblast cells (HFF-1)	uninfected	poly(A) selection	hg38	NC_005336.1	Poxviridae	Parapoxvirus	dsDNA	Chen (unpublished)	50	single	Illumina HiSeq 2500
Orf Virus	ORFV	Homo sapiens	mock_3	SRX2468538	GSE93226	mock-infected HFF-1 cells	Human foreskin fibroblast cells (HFF-1)	uninfected	poly(A) selection	hg38	NC_005336.1	Poxviridae	Parapoxvirus	dsDNA	Chen (unpublished)	50	single	Illumina HiSeq 2500
Reston virus	RESTV	Homo sapiens	inf_1	SRX1911572	GSE84188	MDM infected with RESTV, 48 hpi	primary monocyte derived macrophages	infected	polyA selection	hg38	AF522874.1	Filoviridae	Ebolavirus	(-) ssRNA	Olejnik et al., 2017	75	single	Illumina NextSeq 500
Reston virus	RESTV	Homo sapiens	inf_2	SRX1911586	GSE84188	MDM infected with RESTV, 48 hpi	primary monocyte derived macrophages	infected	polyA selection	hg38	AF522874.1	Filoviridae	Ebolavirus	(-) ssRNA	Olejnik et al., 2017	75	single	Illumina NextSeq 500
Reston virus	RESTV	Homo sapiens	inf_3	SRX1911600	GSE84188	MDM infected with RESTV, 48 hpi	primary monocyte derived macrophages	infected	polyA selection	hg38	AF522874.1	Filoviridae	Ebolavirus	(-) ssRNA	Olejnik et al., 2017	75	single	Illumina NextSeq 500
Reston virus	RESTV	Homo sapiens	mock_1	SRX1911569	GSE84188	uninfected MDMs	primary monocyte derived macrophages	uninfected	polyA selection	hg38	AF522874.1	Filoviridae	Ebolavirus	(-) ssRNA	Olejnik et al., 2017	75	single	Illumina NextSeq 500
Reston virus	RESTV	Homo sapiens	mock_2	SRX1911583	GSE84188	uninfected MDMs	primary monocyte derived macrophages	uninfected	polyA selection	hg38	AF522874.1	Filoviridae	Ebolavirus	(-) ssRNA	Olejnik et al., 2017	75	single	Illumina NextSeq 500
Reston virus	RESTV	Homo sapiens	mock_3	SRX1911597	GSE84188	uninfected MDMs	primary monocyte derived macrophages	uninfected	polyA selection	hg38	AF522874.1	Filoviridae	Ebolavirus	(-) ssRNA	Olejnik et al., 2017	75	single	Illumina NextSeq 500
Rift Valley Fever Virus	RVFV	Homo sapiens	inf_1	SRX3084987	GSE102481	HSAEC cells 18h post infected with virulent (ZH548) RVFV	HSAEC	infected	ribosomal RNA depletion	hg38	NC_014397.1	Phenuiviridae	Phlebovirus	(-) ssRNA	Narayanan (unpublished)	100	paired, but used single	Illumina HiSeq 2500
Rift Valley Fever Virus	RVFV	Homo sapiens	inf_2	SRX3084988	GSE102481	HSAEC cells 18h post infected with virulent (ZH548) RVFV	HSAEC	infected	ribosomal RNA depletion	hg38	NC_014397.1	Phenuiviridae	Phlebovirus	(-) ssRNA	Narayanan (unpublished)	100	paired, but used single	Illumina HiSeq 2500
Rift Valley Fever Virus	RVFV	Homo sapiens	inf_3	SRX3084989	GSE102481	HSAEC cells 18h post infected with virulent (ZH548) RVFV	HSAEC	infected	ribosomal RNA depletion	hg38	NC_014397.1	Phenuiviridae	Phlebovirus	(-) ssRNA	Narayanan (unpublished)	100	paired, but used single	Illumina HiSeq 2500
Rift Valley Fever Virus	RVFV	Homo sapiens	mock_1	SRX3084996	GSE102481	mock-infected HSAEC cells	HSAEC	uninfected	ribosomal RNA depletion	hg38	NC_014397.1	Phenuiviridae	Phlebovirus	(-) ssRNA	Narayanan (unpublished)	100	paired, but used single	Illumina HiSeq 2500
Rift Valley Fever Virus	RVFV	Homo sapiens	mock_2	SRX3084997	GSE102481	mock-infected HSAEC cells	HSAEC	uninfected	ribosomal RNA depletion	hg38	NC_014397.1	Phenuiviridae	Phlebovirus	(-) ssRNA	Narayanan (unpublished)	100	paired, but used single	Illumina HiSeq 2500
Rift Valley Fever Virus	RVFV	Homo sapiens	mock_3	SRX3084998	GSE102481	mock-infected HSAEC cells	HSAEC	uninfected	ribosomal RNA depletion	hg38	NC_014397.1	Phenuiviridae	Phlebovirus	(-) ssRNA	Narayanan (unpublished)	100	paired, but used single	Illumina HiSeq 2500
Sendai Virus	SeV	Homo sapiens	inf_1	SRX4157333	GSE115266	Namalwa B cells infected with Sendai virus	Namalwa B cells	infected	ribosomal RNA depletion	hg38	AB005796.1	Paramyxoviridae	Respirovirus	(-) ssRNA	Mandhana et al., 2018	100	paired, but used single	Illumina HiSeq 2000
Sendai Virus	SeV	Homo sapiens	inf_2	SRX4157334	GSE115266	Namalwa B cells infected with Sendai virus	Namalwa B cells	infected	ribosomal RNA depletion	hg38	AB005796.1	Paramyxoviridae	Respirovirus	(-) ssRNA	Mandhana et al., 2018	100	paired, but used single	Illumina HiSeq 2000
Sendai Virus	SeV	Homo sapiens	mock_1	SRX4157331	GSE115266	mock-infected Namalwa B cells	Namalwa B cells	uninfected	ribosomal RNA depletion	hg38	AB005796.1	Paramyxoviridae	Respirovirus	(-) ssRNA	Mandhana et al., 2018	100	paired, but used single	Illumina HiSeq 2000
Sendai Virus	SeV	Homo sapiens	mock_2	SRX4157332	GSE115266	mock-infected Namalwa B cells	Namalwa B cells	uninfected	ribosomal RNA depletion	hg38	AB005796.1	Paramyxoviridae	Respirovirus	(-) ssRNA	Mandhana et al., 2018	100	paired, but used single	Illumina HiSeq 2000
Sindbus	SINV	Homo sapiens	inf_1	SRX5255032	GSE125182	SINV-infected HEK293 cells (18hpi)	HEK293	infected	poly(A) selection	hg38	NC_001547	Togaviridae	Alphavirus	(+)ssRNA	Garcia-Moreno et al., 2019	78	paired, but used single	Illumina NextSeq 500
Sindbus	SINV	Homo sapiens	inf_2	SRX5255033	GSE125182	SINV-infected HEK293 cells (18hpi)	HEK293	infected	poly(A) selection	hg38	NC_001547	Togaviridae	Alphavirus	(+)ssRNA	Garcia-Moreno et al., 2019	78	paired, but used single	Illumina NextSeq 500
Sindbus	SINV	Homo sapiens	inf_3	SRX5255034	GSE125182	SINV-infected HEK293 cells (18hpi)	HEK293	infected	poly(A) selection	hg38	NC_001547	Togaviridae	Alphavirus	(+)ssRNA	Garcia-Moreno et al., 2019	78	paired, but used single	Illumina NextSeq 500
Sindbus	SINV	Homo sapiens	mock_1	SRX5255026	GSE125182	mock-infected HEK293 cells	HEK293	mock	poly(A) selection	hg38	NC_001547	Togaviridae	Alphavirus	(+)ssRNA	Garcia-Moreno et al., 2019	78	paired, but used single	Illumina NextSeq 500
Sindbus	SINV	Homo sapiens	mock_2	SRX5255027	GSE125182	mock-infected HEK293 cells	HEK293	mock	poly(A) selection	hg38	NC_001547	Togaviridae	Alphavirus	(+)ssRNA	Garcia-Moreno et al., 2019	78	paired, but used single	Illumina NextSeq 500
Sindbus	SINV	Homo sapiens	mock_3	SRX5255028	GSE125182	mock-infected HEK293 cells	HEK293	mock	poly(A) selection	hg38	NC_001547	Togaviridae	Alphavirus	(+)ssRNA	Garcia-Moreno et al., 2019	78	paired, but used single	Illumina NextSeq 500
Varicella Zoster Virus	VZV	Homo sapiens	inf_1	SRX2013140	GSE85493	MeWo cells 36h post infection with HHV-3 (p0ka WT)	MeWo cells	infected	ribosomal RNA depletion	hg38	NC_001348.1	Herpesviridae	Varicellovirus	dsDNA	Oliver et al., 2017	51	single	Illumina HiSeq 2000
Varicella Zoster Virus	VZV	Homo sapiens	inf_2	SRX2013155	GSE85493	MeWo cells 36h post infection with HHV-3 (p0ka WT)	MeWo cells	infected	ribosomal RNA depletion	hg38	NC_001348.1	Herpesviridae	Varicellovirus	dsDNA	Oliver et al., 2017	51	single	Illumina HiSeq 2000
Varicella Zoster Virus	VZV	Homo sapiens	mock_1	SRX2013139	GSE85493	mock-infected MeWo cells	MeWo cells	uninfected	ribosomal RNA depletion	hg38	NC_001348.1	Herpesviridae	Varicellovirus	dsDNA	Oliver et al., 2017	51	single	Illumina HiSeq 2000
Varicella Zoster Virus	VZV	Homo sapiens	mock_2	SRX2013154	GSE85493	mock-infected MeWo cells	MeWo cells	uninfected	ribosomal RNA depletion	hg38	NC_001348.1	Herpesviridae	Varicellovirus	dsDNA	Oliver et al., 2017	51	single	Illumina HiSeq 2000
Zika Virus	ZIKV	Homo sapiens	inf_1	SRX4521355	GSE118305	FACS sorted monocyte-derived macrophages infected with ZIKV	FACS sorted monocyte-derived macrophages	infected	ribosomal RNA depletion	hg38	KU527068.1	Flaviviridae	Flavivirus	(+) ssRNA	Carlin et al., 2018	50	single	Illumina HiSeq 2000
Zika Virus	ZIKV	Homo sapiens	inf_2	SRX4521364	GSE118305	FACS sorted monocyte-derived macrophages infected with ZIKV	FACS sorted monocyte-derived macrophages	infected	ribosomal RNA depletion	hg38	KU527068.1	Flaviviridae	Flavivirus	(+) ssRNA	Carlin et al., 2018	50	single	Illumina HiSeq 2000
Zika Virus	ZIKV	Homo sapiens	inf_3	SRR7660745,SRR7660746,SRR7660747	GSE118305	FACS sorted monocyte-derived macrophages infected with ZIKV	FACS sorted monocyte-derived macrophages	infected	ribosomal RNA depletion	hg38	KU527068.1	Flaviviridae	Flavivirus	(+) ssRNA	Carlin et al., 2018	50	single	Illumina HiSeq 2000
Zika Virus	ZIKV	Homo sapiens	mock_1	SRX4521353	GSE118305	mock-infected FACS sorted monocyte-derived macrophages	FACS sorted monocyte-derived macrophages	uninfected	ribosomal RNA depletion	hg38	KU527068.1	Flaviviridae	Flavivirus	(+) ssRNA	Carlin et al., 2018	50	single	Illumina HiSeq 2000
Zika Virus	ZIKV	Homo sapiens	mock_2	SRX4521358	GSE118305	mock-infected FACS sorted monocyte-derived macrophages	FACS sorted monocyte-derived macrophages	uninfected	ribosomal RNA depletion	hg38	KU527068.1	Flaviviridae	Flavivirus	(+) ssRNA	Carlin et al., 2018	50	single	Illumina HiSeq 2000
Zika Virus	ZIKV	Homo sapiens	mock_3	SRR7660729	GSE118305	mock-infected FACS sorted monocyte-derived macrophages	FACS sorted monocyte-derived macrophages	uninfected	ribosomal RNA depletion	hg38	KU527068.1	Flaviviridae	Flavivirus	(+) ssRNA	Carlin et al., 2018	50	single	Illumina HiSeq 2000

## Sheet: Table S1 - mouse
Virus	Virus abbreviation	species infected	Sample_name	Sample_files	Study	Sample description	cell type	infection status	method	host genome	virus genome	Family	Genus	Virus classification	References	Read length (bp)	Paired/single end read	Sequencer
Influenza A strain H5N1	H5N1	Mus musculus	inf_1	SRX1100427	SRP061303	6w female mouse lung, 3 dpi with H5N1	mouse lung	infected	polyA selection	mm10	A/PR/8/34(H1N1)	Orthomyxoviridae	Alphainfluenzavirus	(-) ssRNA	Park et al., 2015	100	paired, but used single	Illumina HiSeq 2500
Influenza A strain H5N1	H5N1	Mus musculus	inf_2	SRX1100428	SRP061303	6w female mouse lung, 3 dpi with H5N1	mouse lung	infected	polyA selection	mm10	A/PR/8/34(H1N1)	Orthomyxoviridae	Alphainfluenzavirus	(-) ssRNA	Park et al., 2015	100	paired, but used single	Illumina HiSeq 2500
Influenza A strain H5N1	H5N1	Mus musculus	inf_3	SRX1100429	SRP061303	6w female mouse lung, 3 dpi with H5N1	mouse lung	infected	polyA selection	mm10	A/PR/8/34(H1N1)	Orthomyxoviridae	Alphainfluenzavirus	(-) ssRNA	Park et al., 2015	100	paired, but used single	Illumina HiSeq 2500
Influenza A strain H5N1	H5N1	Mus musculus	mock_1	SRX1100420	SRP061303	uninfected 6w female mouse lung	mouse lung	uninfected	polyA selection	mm10	A/PR/8/34(H1N1)	Orthomyxoviridae	Alphainfluenzavirus	(-) ssRNA	Park et al., 2015	100	paired, but used single	Illumina HiSeq 2500
Influenza A strain H5N1	H5N1	Mus musculus	mock_2	SRX1100421	SRP061303	uninfected 6w female mouse lung	mouse lung	uninfected	polyA selection	mm10	A/PR/8/34(H1N1)	Orthomyxoviridae	Alphainfluenzavirus	(-) ssRNA	Park et al., 2015	100	paired, but used single	Illumina HiSeq 2500
Influenza A strain H5N1	H5N1	Mus musculus	mock_3	SRX1100423	SRP061303	uninfected 6w female mouse lung	mouse lung	uninfected	polyA selection	mm10	A/PR/8/34(H1N1)	Orthomyxoviridae	Alphainfluenzavirus	(-) ssRNA	Park et al., 2015	100	paired, but used single	Illumina HiSeq 2500
Influenza A strain H5N8	H5N8	Mus musculus	inf_1	SRX1100430	SRP061303	6w female mouse lung, 3 dpi with H5N8	mouse lung	infected	polyA selection	mm10	A/PR/8/34(H1N1)	Orthomyxoviridae	Alphainfluenzavirus	(-) ssRNA	Park et al., 2015	100	paired, but used single	Illumina HiSeq 2500
Influenza A strain H5N8	H5N8	Mus musculus	inf_2	SRX1100412	SRP061303	6w female mouse lung, 3 dpi with H5N8	mouse lung	infected	polyA selection	mm10	A/PR/8/34(H1N1)	Orthomyxoviridae	Alphainfluenzavirus	(-) ssRNA	Park et al., 2015	100	paired, but used single	Illumina HiSeq 2500
Influenza A strain H5N8	H5N8	Mus musculus	inf_3	SRX1100413	SRP061303	6w female mouse lung, 3 dpi with H5N8	mouse lung	infected	polyA selection	mm10	A/PR/8/34(H1N1)	Orthomyxoviridae	Alphainfluenzavirus	(-) ssRNA	Park et al., 2015	100	paired, but used single	Illumina HiSeq 2500
Influenza A strain H5N8	H5N8	Mus musculus	mock_1	SRX1100420	SRP061303	uninfected 6w female mouse lung	mouse lung	uninfected	polyA selection	mm10	A/PR/8/34(H1N1)	Orthomyxoviridae	Alphainfluenzavirus	(-) ssRNA	Park et al., 2015	100	paired, but used single	Illumina HiSeq 2500
Influenza A strain H5N8	H5N8	Mus musculus	mock_2	SRX1100421	SRP061303	uninfected 6w female mouse lung	mouse lung	uninfected	polyA selection	mm10	A/PR/8/34(H1N1)	Orthomyxoviridae	Alphainfluenzavirus	(-) ssRNA	Park et al., 2015	100	paired, but used single	Illumina HiSeq 2500
Influenza A strain H5N8	H5N8	Mus musculus	mock_3	SRX1100423	SRP061303	uninfected 6w female mouse lung	mouse lung	uninfected	polyA selection	mm10	A/PR/8/34(H1N1)	Orthomyxoviridae	Alphainfluenzavirus	(-) ssRNA	Park et al., 2015	100	paired, but used single	Illumina HiSeq 2500
Herpes Simplex Virus 1 strain 17	HSV-1DRG	Mus musculus	inf_1	SRX1358134	GSE74215	Dorsal root ganglia cells 6 days post HSV-1 infection	Dorsal root ganglia cells	infected		mm10	NC_001806.2	Herpesviridae	Simplexvirus	dsDNA	Khoury-Hanold et al., 2016	151	paired, but used single	Illumina HiSeq 2500
Herpes Simplex Virus 1 strain 17	HSV-1DRG	Mus musculus	inf_2	SRX1358135	GSE74215	Dorsal root ganglia cells 6 days post HSV-1 infection	Dorsal root ganglia cells	infected		mm10	NC_001806.2	Herpesviridae	Simplexvirus	dsDNA	Khoury-Hanold et al., 2016	151	paired, but used single	Illumina HiSeq 2500
Herpes Simplex Virus 1 strain 17	HSV-1DRG	Mus musculus	mock_1	SRX1358138	GSE74215	mock-infected doral root ganglia cells	Dorsal root ganglia cells	uninfected		mm10	NC_001806.2	Herpesviridae	Simplexvirus	dsDNA	Khoury-Hanold et al., 2016	151	paired, but used single	Illumina HiSeq 2500
Herpes Simplex Virus 1 strain 17	HSV-1DRG	Mus musculus	mock_2	SRX1358139	GSE74215	mock-infected doral root ganglia cells	Dorsal root ganglia cells	uninfected		mm10	NC_001806.2	Herpesviridae	Simplexvirus	dsDNA	Khoury-Hanold et al., 2016	151	paired, but used single	Illumina HiSeq 2500
Herpes Simplex Virus 1 strain 17	HSV-1LIM	Mus musculus	inf_1	SRX1358136	GSE74215	Large intestinal musculara cells 6 days post HSV-1 infection	Large intestinal musculara cells	infected		mm10	NC_001806.2	Herpesviridae	Simplexvirus	dsDNA	Khoury-Hanold et al., 2016	151	paired, but used single	Illumina HiSeq 2500
Herpes Simplex Virus 1 strain 17	HSV-1LIM	Mus musculus	inf_2	SRX1358137	GSE74215	Large intestinal musculara cells 6 days post HSV-1 infection	Large intestinal musculara cells	infected		mm10	NC_001806.2	Herpesviridae	Simplexvirus	dsDNA	Khoury-Hanold et al., 2016	151	paired, but used single	Illumina HiSeq 2500
Herpes Simplex Virus 1 strain 17	HSV-1LIM	Mus musculus	mock_1	SRX1358140	GSE74215	Large intestinal musculara cells 6 days post HSV-1 infection	Large intestinal musculara cells	uninfected		mm10	NC_001806.2	Herpesviridae	Simplexvirus	dsDNA	Khoury-Hanold et al., 2016	151	paired, but used single	Illumina HiSeq 2500
Herpes Simplex Virus 1 strain 17	HSV-1LIM	Mus musculus	mock_2	SRX1358141	GSE74215	Large intestinal musculara cells 6 days post HSV-1 infection	Large intestinal musculara cells	uninfected		mm10	NC_001806.2	Herpesviridae	Simplexvirus	dsDNA	Khoury-Hanold et al., 2016	151	paired, but used single	Illumina HiSeq 2500
Influenza A Virus	IAVaecii	Mus musculus	inf_AECII_1	SRR7351100,SRR7351101	GSE115904	IAV-infected airway epithelial cell	AECII	infected	poly(A) selection	mm10	A/PR/8/34(H1N1)	Orthomyxoviridae	Alphainfluenzavirus	(-) ssRNA	Ma et al., 2019	60	paired, but used single	Illumina HiSeq 2500
Influenza A Virus	IAVaecii	Mus musculus	inf_AECII_2	SRR7351102,SRR7351103	GSE115904	IAV-infected airway epithelial cell	AECII	infected	poly(A) selection	mm10	A/PR/8/34(H1N1)	Orthomyxoviridae	Alphainfluenzavirus	(-) ssRNA	Ma et al., 2019	60	paired, but used single	Illumina HiSeq 2500
Influenza A Virus	IAVaecii	Mus musculus	inf_AECII_3	SRR7351104,SRR7351105	GSE115904	IAV-infected airway epithelial cell	AECII	infected	poly(A) selection	mm10	A/PR/8/34(H1N1)	Orthomyxoviridae	Alphainfluenzavirus	(-) ssRNA	Ma et al., 2019	60	paired, but used single	Illumina HiSeq 2500
Influenza A Virus	IAVaecii	Mus musculus	inf_AECII_4	SRR7351106,SRR7351107	GSE115904	IAV-infected airway epithelial cell	AECII	infected	poly(A) selection	mm10	A/PR/8/34(H1N1)	Orthomyxoviridae	Alphainfluenzavirus	(-) ssRNA	Ma et al., 2019	60	paired, but used single	Illumina HiSeq 2500
Influenza A Virus	IAVaecii	Mus musculus	mock_AECII_1	SRR7351068,SRR7351069	GSE115904	mock-infected airway epithelial cell	AECII	uninfected	poly(A) selection	mm10	A/PR/8/34(H1N1)	Orthomyxoviridae	Alphainfluenzavirus	(-) ssRNA	Ma et al., 2019	60	paired, but used single	Illumina HiSeq 2500
Influenza A Virus	IAVaecii	Mus musculus	mock_AECII_2	SRR7351070,SRR7351071	GSE115904	mock-infected airway epithelial cell	AECII	uninfected	poly(A) selection	mm10	A/PR/8/34(H1N1)	Orthomyxoviridae	Alphainfluenzavirus	(-) ssRNA	Ma et al., 2019	60	paired, but used single	Illumina HiSeq 2500
Influenza A Virus	IAVaecii	Mus musculus	mock_AECII_3	SRR7351072,SRR7351073	GSE115904	mock-infected airway epithelial cell	AECII	uninfected	poly(A) selection	mm10	A/PR/8/34(H1N1)	Orthomyxoviridae	Alphainfluenzavirus	(-) ssRNA	Ma et al., 2019	60	paired, but used single	Illumina HiSeq 2500
Influenza A Virus	IAVaecii	Mus musculus	mock_AECII_4	SRR7351074,SRR7351075	GSE115904	mock-infected airway epithelial cell	AECII	uninfected	poly(A) selection	mm10	A/PR/8/34(H1N1)	Orthomyxoviridae	Alphainfluenzavirus	(-) ssRNA	Ma et al., 2019	60	paired, but used single	Illumina HiSeq 2500
Influenza A Virus	IAVam	Mus musculus	inf_AM_1	SRR7351108,SRR7351109	GSE115904	IAV-infected alveolar macrophage	AM	infected	poly(A) selection	mm10	A/PR/8/34(H1N1)	Orthomyxoviridae	Alphainfluenzavirus	(-) ssRNA	Ma et al., 2019	60	paired, but used single	Illumina HiSeq 2500
Influenza A Virus	IAVam	Mus musculus	inf_AM_2	SRR7351110,SRR7351111	GSE115904	IAV-infected alveolar macrophage	AM	infected	poly(A) selection	mm10	A/PR/8/34(H1N1)	Orthomyxoviridae	Alphainfluenzavirus	(-) ssRNA	Ma et al., 2019	60	paired, but used single	Illumina HiSeq 2500
Influenza A Virus	IAVam	Mus musculus	inf_AM_3	SRR7351112,SRR7351113	GSE115904	IAV-infected alveolar macrophage	AM	infected	poly(A) selection	mm10	A/PR/8/34(H1N1)	Orthomyxoviridae	Alphainfluenzavirus	(-) ssRNA	Ma et al., 2019	60	paired, but used single	Illumina HiSeq 2500
Influenza A Virus	IAVam	Mus musculus	inf_AM_4	SRR7351114,SRR7351115	GSE115904	IAV-infected alveolar macrophage	AM	infected	poly(A) selection	mm10	A/PR/8/34(H1N1)	Orthomyxoviridae	Alphainfluenzavirus	(-) ssRNA	Ma et al., 2019	60	paired, but used single	Illumina HiSeq 2500
Influenza A Virus	IAVam	Mus musculus	mock_AM_1	SRR7351076,SRR7351077	GSE115904	mock-infected alveolar macrophage	AM	uninfected	poly(A) selection	mm10	A/PR/8/34(H1N1)	Orthomyxoviridae	Alphainfluenzavirus	(-) ssRNA	Ma et al., 2019	60	paired, but used single	Illumina HiSeq 2500
Influenza A Virus	IAVam	Mus musculus	mock_AM_2	SRR7351078,SRR7351079	GSE115904	mock-infected alveolar macrophage	AM	uninfected	poly(A) selection	mm10	A/PR/8/34(H1N1)	Orthomyxoviridae	Alphainfluenzavirus	(-) ssRNA	Ma et al., 2019	60	paired, but used single	Illumina HiSeq 2500
Influenza A Virus	IAVam	Mus musculus	mock_AM_3	SRR7351080,SRR7351081	GSE115904	mock-infected alveolar macrophage	AM	uninfected	poly(A) selection	mm10	A/PR/8/34(H1N1)	Orthomyxoviridae	Alphainfluenzavirus	(-) ssRNA	Ma et al., 2019	60	paired, but used single	Illumina HiSeq 2500
Influenza A Virus	IAVam	Mus musculus	mock_AM_4	SRR7351082,SRR7351083	GSE115904	mock-infected alveolar macrophage	AM	uninfected	poly(A) selection	mm10	A/PR/8/34(H1N1)	Orthomyxoviridae	Alphainfluenzavirus	(-) ssRNA	Ma et al., 2019	60	paired, but used single	Illumina HiSeq 2500
Influenza A Virus	IAVcc	Mus musculus	inf_CC_1	SRR7351116,SRR7351117	GSE115904	IAV-infected ciliated cell	CC	infected	poly(A) selection	mm10	A/PR/8/34(H1N1)	Orthomyxoviridae	Alphainfluenzavirus	(-) ssRNA	Ma et al., 2019	60	paired, but used single	Illumina HiSeq 2500
Influenza A Virus	IAVcc	Mus musculus	inf_CC_2	SRR7351118,SRR7351119	GSE115904	IAV-infected ciliated cell	CC	infected	poly(A) selection	mm10	A/PR/8/34(H1N1)	Orthomyxoviridae	Alphainfluenzavirus	(-) ssRNA	Ma et al., 2019	60	paired, but used single	Illumina HiSeq 2500
Influenza A Virus	IAVcc	Mus musculus	inf_CC_3	SRR7351120,SRR7351121	GSE115904	IAV-infected ciliated cell	CC	infected	poly(A) selection	mm10	A/PR/8/34(H1N1)	Orthomyxoviridae	Alphainfluenzavirus	(-) ssRNA	Ma et al., 2019	60	paired, but used single	Illumina HiSeq 2500
Influenza A Virus	IAVcc	Mus musculus	inf_CC_4	SRR7351122,SRR7351123	GSE115904	IAV-infected ciliated cell	CC	infected	poly(A) selection	mm10	A/PR/8/34(H1N1)	Orthomyxoviridae	Alphainfluenzavirus	(-) ssRNA	Ma et al., 2019	60	paired, but used single	Illumina HiSeq 2500
Influenza A Virus	IAVcc	Mus musculus	mock_CC_1	SRR7351084,SRR7351085	GSE115904	mock-infected ciliated cell	CC	uninfected	poly(A) selection	mm10	A/PR/8/34(H1N1)	Orthomyxoviridae	Alphainfluenzavirus	(-) ssRNA	Ma et al., 2019	60	paired, but used single	Illumina HiSeq 2500
Influenza A Virus	IAVcc	Mus musculus	mock_CC_2	SRR7351086,SRR7351087	GSE115904	mock-infected ciliated cell	CC	uninfected	poly(A) selection	mm10	A/PR/8/34(H1N1)	Orthomyxoviridae	Alphainfluenzavirus	(-) ssRNA	Ma et al., 2019	60	paired, but used single	Illumina HiSeq 2500
Influenza A Virus	IAVcc	Mus musculus	mock_CC_3	SRR7351088,SRR7351089	GSE115904	mock-infected ciliated cell	CC	uninfected	poly(A) selection	mm10	A/PR/8/34(H1N1)	Orthomyxoviridae	Alphainfluenzavirus	(-) ssRNA	Ma et al., 2019	60	paired, but used single	Illumina HiSeq 2500
Influenza A Virus	IAVcc	Mus musculus	mock_CC_4	SRR7351090,SRR7351091	GSE115904	mock-infected ciliated cell	CC	uninfected	poly(A) selection	mm10	A/PR/8/34(H1N1)	Orthomyxoviridae	Alphainfluenzavirus	(-) ssRNA	Ma et al., 2019	60	paired, but used single	Illumina HiSeq 2500
Influenza A Virus	IAVcd103	Mus musculus	inf_CD103_1	SRR7351124,SRR7351125	GSE115904	IAV-infected dentritic cell	CD103	infected	poly(A) selection	mm10	A/PR/8/34(H1N1)	Orthomyxoviridae	Alphainfluenzavirus	(-) ssRNA	Ma et al., 2019	60	paired, but used single	Illumina HiSeq 2500
Influenza A Virus	IAVcd103	Mus musculus	inf_CD103_2	SRR7351126,SRR7351127	GSE115904	IAV-infected dentritic cell	CD103	infected	poly(A) selection	mm10	A/PR/8/34(H1N1)	Orthomyxoviridae	Alphainfluenzavirus	(-) ssRNA	Ma et al., 2019	60	paired, but used single	Illumina HiSeq 2500
Influenza A Virus	IAVcd103	Mus musculus	inf_CD103_3	SRR7351128,SRR7351129	GSE115904	IAV-infected dentritic cell	CD103	infected	poly(A) selection	mm10	A/PR/8/34(H1N1)	Orthomyxoviridae	Alphainfluenzavirus	(-) ssRNA	Ma et al., 2019	60	paired, but used single	Illumina HiSeq 2500
Influenza A Virus	IAVcd103	Mus musculus	inf_CD103_4	SRR7351130,SRR7351131	GSE115904	IAV-infected dentritic cell	CD103	infected	poly(A) selection	mm10	A/PR/8/34(H1N1)	Orthomyxoviridae	Alphainfluenzavirus	(-) ssRNA	Ma et al., 2019	60	paired, but used single	Illumina HiSeq 2500
Influenza A Virus	IAVcd103	Mus musculus	mock_CD103_1	SRR7351092,SRR7351093	GSE115904	mock-infected dendritic cell	CD103	uninfected	poly(A) selection	mm10	A/PR/8/34(H1N1)	Orthomyxoviridae	Alphainfluenzavirus	(-) ssRNA	Ma et al., 2019	60	paired, but used single	Illumina HiSeq 2500
Influenza A Virus	IAVcd103	Mus musculus	mock_CD103_2	SRR7351094,SRR7351095	GSE115904	mock-infected dendritic cell	CD103	uninfected	poly(A) selection	mm10	A/PR/8/34(H1N1)	Orthomyxoviridae	Alphainfluenzavirus	(-) ssRNA	Ma et al., 2019	60	paired, but used single	Illumina HiSeq 2500
Influenza A Virus	IAVcd103	Mus musculus	mock_CD103_3	SRR7351096,SRR7351097	GSE115904	mock-infected dendritic cell	CD103	uninfected	poly(A) selection	mm10	A/PR/8/34(H1N1)	Orthomyxoviridae	Alphainfluenzavirus	(-) ssRNA	Ma et al., 2019	60	paired, but used single	Illumina HiSeq 2500
Influenza A Virus	IAVcd103	Mus musculus	mock_CD103_4	SRR7351098,SRR7351099	GSE115904	mock-infected dendritic cell	CD103	uninfected	poly(A) selection	mm10	A/PR/8/34(H1N1)	Orthomyxoviridae	Alphainfluenzavirus	(-) ssRNA	Ma et al., 2019	60	paired, but used single	Illumina HiSeq 2500
Influenza B virus	IBV	Mus musculus	inf_1	SRX4231052	GSE115952	lung ciliated survivor cells, 14 dpi with IBV	ciliated lung cells	infected	polyA selection	mm10	NC_002204.1	Orthomyxoviridae	Betainfluenzavirus	(-) ssRNA	Dumm et al., 2019	151	single	Illumina HiSeq 2500
Influenza B virus	IBV	Mus musculus	inf_2	SRX4231053	GSE115952	lung ciliated survivor cells, 14 dpi with IBV	ciliated lung cells	infected	polyA selection	mm10	NC_002204.1	Orthomyxoviridae	Betainfluenzavirus	(-) ssRNA	Dumm et al., 2019	151	single	Illumina HiSeq 2500
Influenza B virus	IBV	Mus musculus	inf_3	SRX4231060	GSE115952	lung ciliated survivor cells, 14 dpi with IBV	ciliated lung cells	infected	polyA selection	mm10	NC_002204.1	Orthomyxoviridae	Betainfluenzavirus	(-) ssRNA	Dumm et al., 2019	151	single	Illumina HiSeq 2500
Influenza B virus	IBV	Mus musculus	inf_4	SRX4231061	GSE115952	lung ciliated survivor cells, 14 dpi with IBV	ciliated lung cells	infected	polyA selection	mm10	NC_002204.1	Orthomyxoviridae	Betainfluenzavirus	(-) ssRNA	Dumm et al., 2019	151	single	Illumina HiSeq 2500
Influenza B virus	IBV	Mus musculus	mock_1	SRX4231048	GSE115952	uninfected lung ciliated cells	ciliated lung cells	uninfected	polyA selection	mm10	NC_002204.1	Orthomyxoviridae	Betainfluenzavirus	(-) ssRNA	Dumm et al., 2019	151	single	Illumina HiSeq 2500
Influenza B virus	IBV	Mus musculus	mock_2	SRX4231049	GSE115952	uninfected lung ciliated cells	ciliated lung cells	uninfected	polyA selection	mm10	NC_002204.1	Orthomyxoviridae	Betainfluenzavirus	(-) ssRNA	Dumm et al., 2019	151	single	Illumina HiSeq 2500
Influenza B virus	IBV	Mus musculus	mock_3	SRX4231056	GSE115952	uninfected lung ciliated cells	ciliated lung cells	uninfected	polyA selection	mm10	NC_002204.1	Orthomyxoviridae	Betainfluenzavirus	(-) ssRNA	Dumm et al., 2019	151	single	Illumina HiSeq 2500
Influenza B virus	IBV	Mus musculus	mock_4	SRX4231057	GSE115952	uninfected lung ciliated cells	ciliated lung cells	uninfected	polyA selection	mm10	NC_002204.1	Orthomyxoviridae	Betainfluenzavirus	(-) ssRNA	Dumm et al., 2019	151	single	Illumina HiSeq 2500
lymphocytic choriomeningitis mammarenavirus	LCMV	Mus musculus	inf_1	SRX4024268	GSE113980	spleen-derived WT NK cells (Cd45+NK1.1+Nkp46+), infected with LCMV	spleen-derived NK cells (Cd45+NK1.1+Nkp46+)	infected	rRNA depletion	mm10	GCF_000851025.1	Arenaviridae	Mammarenavirus	(-) ssRNA	Nath et al, 2018	151	paired, but used single	Illumina HiSeq 4000
lymphocytic choriomeningitis mammarenavirus	LCMV	Mus musculus	inf_2	SRX4024269	GSE113980	spleen-derived WT NK cells (Cd45+NK1.1+Nkp46+), infected with LCMV	spleen-derived NK cells (Cd45+NK1.1+Nkp46+)	infected	rRNA depletion	mm10	GCF_000851025.1	Arenaviridae	Mammarenavirus	(-) ssRNA	Nath et al, 2018	151	paired, but used single	Illumina HiSeq 4000
lymphocytic choriomeningitis mammarenavirus	LCMV	Mus musculus	inf_3	SRX4024270	GSE113980	spleen-derived WT NK cells (Cd45+NK1.1+Nkp46+), infected with LCMV	spleen-derived NK cells (Cd45+NK1.1+Nkp46+)	infected	rRNA depletion	mm10	GCF_000851025.1	Arenaviridae	Mammarenavirus	(-) ssRNA	Nath et al, 2018	151	paired, but used single	Illumina HiSeq 4000
lymphocytic choriomeningitis mammarenavirus	LCMV	Mus musculus	inf_4	SRX4024271	GSE113980	spleen-derived WT NK cells (Cd45+NK1.1+Nkp46+), infected with LCMV	spleen-derived NK cells (Cd45+NK1.1+Nkp46+)	infected	rRNA depletion	mm10	GCF_000851025.1	Arenaviridae	Mammarenavirus	(-) ssRNA	Nath et al, 2018	151	paired, but used single	Illumina HiSeq 4000
lymphocytic choriomeningitis mammarenavirus	LCMV	Mus musculus	mock_1	SRX4024272	GSE113980	spleen-derived uninfected WT NK cells (Cd45+NK1.1+Nkp46+)	spleen-derived NK cells (Cd45+NK1.1+Nkp46+)	uninfected	rRNA depletion	mm10	GCF_000851025.1	Arenaviridae	Mammarenavirus	(-) ssRNA	Nath et al, 2018	151	paired, but used single	Illumina HiSeq 4000
lymphocytic choriomeningitis mammarenavirus	LCMV	Mus musculus	mock_2	SRX4024273	GSE113980	spleen-derived uninfected WT NK cells (Cd45+NK1.1+Nkp46+)	spleen-derived NK cells (Cd45+NK1.1+Nkp46+)	uninfected	rRNA depletion	mm10	GCF_000851025.1	Arenaviridae	Mammarenavirus	(-) ssRNA	Nath et al, 2018	151	paired, but used single	Illumina HiSeq 4000
lymphocytic choriomeningitis mammarenavirus	LCMV	Mus musculus	mock_3	SRX4024274	GSE113980	spleen-derived uninfected WT NK cells (Cd45+NK1.1+Nkp46+)	spleen-derived NK cells (Cd45+NK1.1+Nkp46+)	uninfected	rRNA depletion	mm10	GCF_000851025.1	Arenaviridae	Mammarenavirus	(-) ssRNA	Nath et al, 2018	151	paired, but used single	Illumina HiSeq 4000
lymphocytic choriomeningitis mammarenavirus	LCMV	Mus musculus	mock_4	SRX4024275	GSE113980	spleen-derived uninfected WT NK cells (Cd45+NK1.1+Nkp46+)	spleen-derived NK cells (Cd45+NK1.1+Nkp46+)	uninfected	rRNA depletion	mm10	GCF_000851025.1	Arenaviridae	Mammarenavirus	(-) ssRNA	Nath et al, 2018	151	paired, but used single	Illumina HiSeq 4000
lymphocytic choriomeningitis mammarenavirus	LCMV	Mus musculus	mock_5	SRX4024276	GSE113980	spleen-derived uninfected WT NK cells (Cd45+NK1.1+Nkp46+)	spleen-derived NK cells (Cd45+NK1.1+Nkp46+)	uninfected	rRNA depletion	mm10	GCF_000851025.1	Arenaviridae	Mammarenavirus	(-) ssRNA	Nath et al, 2018	151	paired, but used single	Illumina HiSeq 4000
lymphocytic choriomeningitis mammarenavirus	LCMV	Mus musculus	mock_6	SRX4024277	GSE113980	spleen-derived uninfected WT NK cells (Cd45+NK1.1+Nkp46+)	spleen-derived NK cells (Cd45+NK1.1+Nkp46+)	uninfected	rRNA depletion	mm10	GCF_000851025.1	Arenaviridae	Mammarenavirus	(-) ssRNA	Nath et al, 2018	151	paired, but used single	Illumina HiSeq 4000
Murine cytomegalovirus	MCMV	Mus musculus	inf_1	SRX3944390	GSE113214	NK cells infected with MCMV, 7 dpi	NK cells	infected		mm10	NC_004065.1	Herpesviridae	cytomegalovirus	dsDNA	Dong et al., 2019	101	paired, but used single	Illumina HiSeq 4000
Murine cytomegalovirus	MCMV	Mus musculus	inf_2	SRX3944391	GSE113214	NK cells infected with MCMV, 7 dpi	NK cells	infected		mm10	NC_004065.1	Herpesviridae	cytomegalovirus	dsDNA	Dong et al., 2019	101	paired, but used single	Illumina HiSeq 4000
Murine cytomegalovirus	MCMV	Mus musculus	inf_3	SRX3944393	GSE113214	NK cells infected with MCMV, 7 dpi	NK cells	infected		mm10	NC_004065.1	Herpesviridae	cytomegalovirus	dsDNA	Dong et al., 2019	101	paired, but used single	Illumina HiSeq 4000
Murine cytomegalovirus	MCMV	Mus musculus	mock_1	SRX3944383	GSE113214	uninfected NK cells	NK cells	uninfected		mm10	NC_004065.1	Herpesviridae	cytomegalovirus	dsDNA	Dong et al., 2019	101	paired, but used single	Illumina HiSeq 4000
Murine cytomegalovirus	MCMV	Mus musculus	mock_2	SRX3944384	GSE113214	uninfected NK cells	NK cells	uninfected		mm10	NC_004065.1	Herpesviridae	cytomegalovirus	dsDNA	Dong et al., 2019	101	paired, but used single	Illumina HiSeq 4000
Murine cytomegalovirus	MCMV	Mus musculus	mock_3	SRX3944385	GSE113214	uninfected NK cells	NK cells	uninfected		mm10	NC_004065.1	Herpesviridae	cytomegalovirus	dsDNA	Dong et al., 2019	101	paired, but used single	Illumina HiSeq 4000
Murine coronavirus	MHV-A59	Mus musculus	inf_1	ERR1190996	ERP013565	17Cl-1 cells 8 hpi with MHV-A59	Murine 17 clone 1 (17Cl-1) (Sturman and Takemoto, 1972)	infected		mm10	NC_001846.1	Coronaviridae	Betacoronavirus	(+) ssRNA	Irigoyen et al., 2016	32	single	Illumina HiSeq 2000
Murine coronavirus	MHV-A59	Mus musculus	inf_2	ERR1191016	ERP013565	17Cl-1 cells 8 hpi with MHV-A59	Murine 17 clone 1 (17Cl-1) (Sturman and Takemoto, 1972)	infected		mm10	NC_001846.1	Coronaviridae	Betacoronavirus	(+) ssRNA	Irigoyen et al., 2016	32	single	Illumina HiSeq 2000
Murine coronavirus	MHV-A59	Mus musculus	mock_1	ERR1190998	ERP013565	17Cl-1 cells 8 hours post mock infection	Murine 17 clone 1 (17Cl-1) (Sturman and Takemoto, 1972)	uninfected		mm10	NC_001846.1	Coronaviridae	Betacoronavirus	(+) ssRNA	Irigoyen et al., 2016	32	single	Illumina HiSeq 2000
Murine coronavirus	MHV-A59	Mus musculus	mock_2	ERR1191018	ERP013565	17Cl-1 cells 8 hours post mock infection	Murine 17 clone 1 (17Cl-1) (Sturman and Takemoto, 1972)	uninfected		mm10	NC_001846.1	Coronaviridae	Betacoronavirus	(+) ssRNA	Irigoyen et al., 2016	32	single	Illumina HiSeq 2000
Murine gammaherpesvirus 68	MHV68	Mus musculus	inf_1	SRX1080176	GSE70481	NIH 3T3 fibroblast cells infected with MHV68 for 24 hrs	NIH 3T3 fibroblast cells	infected	polyA selection	mm10	NC_002204.1	Herpesviridae	Rhadinovirus	dsDNA	Abernathy et al., 2015	100	paired, but used single	Illumina HiSeq 2500
Murine gammaherpesvirus 68	MHV68	Mus musculus	inf_2	SRX1080177	GSE70481	NIH 3T3 fibroblast cells infected with MHV68 for 24 hrs	NIH 3T3 fibroblast cells	infected	polyA selection	mm10	NC_002204.1	Herpesviridae	Rhadinovirus	dsDNA	Abernathy et al., 2015	100	paired, but used single	Illumina HiSeq 2500
Murine gammaherpesvirus 68	MHV68	Mus musculus	mock_1	SRX1080174	GSE70481	uninfected NIH 3T3 fibroblast cells	NIH 3T3 fibroblast cells	uninfected	polyA selection	mm10	NC_002204.1	Herpesviridae	Rhadinovirus	dsDNA	Abernathy et al., 2015	100	paired, but used single	Illumina HiSeq 2500
Murine gammaherpesvirus 68	MHV68	Mus musculus	mock_2	SRX1080175	GSE70481	uninfected NIH 3T3 fibroblast cells	NIH 3T3 fibroblast cells	uninfected	polyA selection	mm10	NC_002204.1	Herpesviridae	Rhadinovirus	dsDNA	Abernathy et al., 2015	100	paired, but used single	Illumina HiSeq 2500
West Nile Virus	WNV	Mus musculus	inf_1	SRX3270253	GSE104817	Bone marrow derived macrophages 48hpi with WNV	BM macrophages	infected		mm10	NC_001563.2	Flaviviridae	Flavivirus	(+) ssRNA	Stone (unpublished)	51	paired, but used single	Illumina NextSeq 500
West Nile Virus	WNV	Mus musculus	inf_2	SRX3270254	GSE104817	Bone marrow derived macrophages 48hpi with WNV	BM macrophages	infected		mm10	NC_001563.2	Flaviviridae	Flavivirus	(+) ssRNA	Stone (unpublished)	51	paired, but used single	Illumina NextSeq 500
West Nile Virus	WNV	Mus musculus	inf_3	SRX3270255	GSE104817	Bone marrow derived macrophages 48hpi with WNV	BM macrophages	infected		mm10	NC_001563.2	Flaviviridae	Flavivirus	(+) ssRNA	Stone (unpublished)	51	paired, but used single	Illumina NextSeq 500
West Nile Virus	WNV	Mus musculus	mock_1	SRX3270256	GSE104817	bone marrow derived macrophages 48hp mock-infection	BM macrophages	uninfected		mm10	NC_001563.2	Flaviviridae	Flavivirus	(+) ssRNA	Stone (unpublished)	51	paired, but used single	Illumina NextSeq 500
West Nile Virus	WNV	Mus musculus	mock_2	SRX3270257	GSE104817	bone marrow derived macrophages 48hp mock-infection	BM macrophages	uninfected		mm10	NC_001563.2	Flaviviridae	Flavivirus	(+) ssRNA	Stone (unpublished)	51	paired, but used single	Illumina NextSeq 500
West Nile Virus	WNV	Mus musculus	mock_3	SRX3270258	GSE104817	bone marrow derived macrophages 48hp mock-infection	BM macrophages	uninfected		mm10	NC_001563.2	Flaviviridae	Flavivirus	(+) ssRNA	Stone (unpublished)	51	paired, but used single	Illumina NextSeq 500
West Nile Virus	WNV	Mus musculus	mock_4	SRX3270259	GSE104817	bone marrow derived macrophages 48hp mock-infection	BM macrophages	uninfected		mm10	NC_001563.2	Flaviviridae	Flavivirus	(+) ssRNA	Stone (unpublished)	51	paired, but used single	Illumina NextSeq 500
West Nile Virus	WNV12hpi	Mus musculus	inf_1	SRX3270253	GSE104817	Bone marrow derived macrophages 12hpi with WNV	BM macrophages	infected	poly(A) selection	mm10	NC_001563.2	Flaviviridae	Flavivirus	(+) ssRNA	Stone (unpublished)	51	paired, but used single	Illumina NextSeq 500
West Nile Virus	WNV12hpi	Mus musculus	inf_2	SRX3270254	GSE104817	Bone marrow derived macrophages 12hpi with WNV	BM macrophages	infected	poly(A) selection	mm10	NC_001563.2	Flaviviridae	Flavivirus	(+) ssRNA	Stone (unpublished)	51	paired, but used single	Illumina NextSeq 500
West Nile Virus	WNV12hpi	Mus musculus	inf_3	SRX3270255	GSE104817	Bone marrow derived macrophages 12hpi with WNV	BM macrophages	infected	poly(A) selection	mm10	NC_001563.2	Flaviviridae	Flavivirus	(+) ssRNA	Stone (unpublished)	51	paired, but used single	Illumina NextSeq 500
West Nile Virus	WNV12hpi	Mus musculus	mock_1	SRX3270256	GSE104817	Bone marrow derived macrophages 12hpi with WNV	BM macrophages	uninfected	poly(A) selection	mm10	NC_001563.2	Flaviviridae	Flavivirus	(+) ssRNA	Stone (unpublished)	51	paired, but used single	Illumina NextSeq 500
West Nile Virus	WNV12hpi	Mus musculus	mock_2	SRX3270257	GSE104817	Bone marrow derived macrophages 12hpi with WNV	BM macrophages	uninfected	poly(A) selection	mm10	NC_001563.2	Flaviviridae	Flavivirus	(+) ssRNA	Stone (unpublished)	51	paired, but used single	Illumina NextSeq 500
West Nile Virus	WNV12hpi	Mus musculus	mock_3	SRX3270258	GSE104817	Bone marrow derived macrophages 12hpi with WNV	BM macrophages	uninfected	poly(A) selection	mm10	NC_001563.2	Flaviviridae	Flavivirus	(+) ssRNA	Stone (unpublished)	51	paired, but used single	Illumina NextSeq 500

## Sheet: Table S1 - timecourses
Virus	Virus abbreviation	species infected	Sample_name	Sample_files	Study	Sample description	Time point (hours)	cell type	infection status	method	host genome	virus genome	Family	Genus	Virus classification	Reference	Read length (bp)	Paired/single end read	Sequencer
Influenza A strain B6	IAV	Mus musculus	mock_1	SRX335780	GSE49933	0h uninfected mouse lung	0	lung	uninfected	fragmentation followed by polyA selection (3' end capture)	mm10	A/PR/8/34(H1N1)	Orthomyxoviridae	Alphainfluenzavirus	(-) ssRNA	Altboum et al., 2014	50	single	Illumina HiSeq 2000
Influenza A strain B6	IAV	Mus musculus	mock_2	SRX335782	GSE49933	0h uninfected mouse lung	0	lung	uninfected	fragmentation followed by polyA selection (3' end capture)	mm10	A/PR/8/34(H1N1)	Orthomyxoviridae	Alphainfluenzavirus	(-) ssRNA	Altboum et al., 2014	50	single	Illumina HiSeq 2000
Influenza A strain B6	IAV	Mus musculus	inf_3	SRX335784	GSE49933	3h IAV-infected mouse lung	3	lung	infected	fragmentation followed by polyA selection (3' end capture)	mm10	A/PR/8/34(H1N1)	Orthomyxoviridae	Alphainfluenzavirus	(-) ssRNA	Altboum et al., 2014	50	single	Illumina HiSeq 2000
Influenza A strain B6	IAV	Mus musculus	inf_4	SRX335785	GSE49933	4h IAV-infected mouse lung	4	lung	infected	fragmentation followed by polyA selection (3' end capture)	mm10	A/PR/8/34(H1N1)	Orthomyxoviridae	Alphainfluenzavirus	(-) ssRNA	Altboum et al., 2014	50	single	Illumina HiSeq 2000
Influenza A strain B6	IAV	Mus musculus	inf_7	SRX335786	GSE49933	7h IAV-infected mouse lung	7	lung	infected	fragmentation followed by polyA selection (3' end capture)	mm10	A/PR/8/34(H1N1)	Orthomyxoviridae	Alphainfluenzavirus	(-) ssRNA	Altboum et al., 2014	50	single	Illumina HiSeq 2000
Influenza A strain B6	IAV	Mus musculus	inf_8	SRX335787	GSE49933	8h IAV-infected mouse lung	8	lung	infected	fragmentation followed by polyA selection (3' end capture)	mm10	A/PR/8/34(H1N1)	Orthomyxoviridae	Alphainfluenzavirus	(-) ssRNA	Altboum et al., 2014	50	single	Illumina HiSeq 2000
Influenza A strain B6	IAV	Mus musculus	inf_11	SRX335788	GSE49933	11h IAV-infected mouse lung	11	lung	infected	fragmentation followed by polyA selection (3' end capture)	mm10	A/PR/8/34(H1N1)	Orthomyxoviridae	Alphainfluenzavirus	(-) ssRNA	Altboum et al., 2014	50	single	Illumina HiSeq 2000
Influenza A strain B6	IAV	Mus musculus	inf_12	SRX335789	GSE49933	12h IAV-infected mouse lung	12	lung	infected	fragmentation followed by polyA selection (3' end capture)	mm10	A/PR/8/34(H1N1)	Orthomyxoviridae	Alphainfluenzavirus	(-) ssRNA	Altboum et al., 2014	50	single	Illumina HiSeq 2000
Influenza A strain B6	IAV	Mus musculus	inf_26	SRX335790	GSE49933	26h IAV-infected mouse lung	26	lung	infected	fragmentation followed by polyA selection (3' end capture)	mm10	A/PR/8/34(H1N1)	Orthomyxoviridae	Alphainfluenzavirus	(-) ssRNA	Altboum et al., 2014	50	single	Illumina HiSeq 2000
Influenza A strain B6	IAV	Mus musculus	inf_28	SRX335791	GSE49933	28h IAV-infected mouse lung	28	lung	infected	fragmentation followed by polyA selection (3' end capture)	mm10	A/PR/8/34(H1N1)	Orthomyxoviridae	Alphainfluenzavirus	(-) ssRNA	Altboum et al., 2014	50	single	Illumina HiSeq 2000
Influenza A strain B6	IAV	Mus musculus	inf_32	SRX335792	GSE49933	32h IAV-infected mouse lung	32	lung	infected	fragmentation followed by polyA selection (3' end capture)	mm10	A/PR/8/34(H1N1)	Orthomyxoviridae	Alphainfluenzavirus	(-) ssRNA	Altboum et al., 2014	50	single	Illumina HiSeq 2000
Influenza A strain B6	IAV	Mus musculus	inf_49	SRX335793	GSE49933	49h IAV-infected mouse lung	49	lung	infected	fragmentation followed by polyA selection (3' end capture)	mm10	A/PR/8/34(H1N1)	Orthomyxoviridae	Alphainfluenzavirus	(-) ssRNA	Altboum et al., 2014	50	single	Illumina HiSeq 2000
Influenza A strain B6	IAV	Mus musculus	inf_50	SRX335794	GSE49933	50h IAV-infected mouse lung	50	lung	infected	fragmentation followed by polyA selection (3' end capture)	mm10	A/PR/8/34(H1N1)	Orthomyxoviridae	Alphainfluenzavirus	(-) ssRNA	Altboum et al., 2014	50	single	Illumina HiSeq 2000
Influenza A strain B6	IAV	Mus musculus	inf_74	SRX335795	GSE49933	74h IAV-infected mouse lung	74	lung	infected	fragmentation followed by polyA selection (3' end capture)	mm10	A/PR/8/34(H1N1)	Orthomyxoviridae	Alphainfluenzavirus	(-) ssRNA	Altboum et al., 2014	50	single	Illumina HiSeq 2000
Influenza A strain B6	IAV	Mus musculus	inf_75	SRX335796	GSE49933	75h IAV-infected mouse lung	75	lung	infected	fragmentation followed by polyA selection (3' end capture)	mm10	A/PR/8/34(H1N1)	Orthomyxoviridae	Alphainfluenzavirus	(-) ssRNA	Altboum et al., 2014	50	single	Illumina HiSeq 2000
Influenza A strain B6	IAV	Mus musculus	inf_98	SRX335797	GSE49933	98h IAV-infected mouse lung	98	lung	infected	fragmentation followed by polyA selection (3' end capture)	mm10	A/PR/8/34(H1N1)	Orthomyxoviridae	Alphainfluenzavirus	(-) ssRNA	Altboum et al., 2014	50	single	Illumina HiSeq 2000
Influenza A strain B6	IAV	Mus musculus	inf_99	SRX335798	GSE49933	99h IAV-infected mouse lung	99	lung	infected	fragmentation followed by polyA selection (3' end capture)	mm10	A/PR/8/34(H1N1)	Orthomyxoviridae	Alphainfluenzavirus	(-) ssRNA	Altboum et al., 2014	50	single	Illumina HiSeq 2000
Influenza A strain B6	IAV	Mus musculus	inf_122	SRX335799	GSE49933	122h IAV-infected mouse lung	122	lung	infected	fragmentation followed by polyA selection (3' end capture)	mm10	A/PR/8/34(H1N1)	Orthomyxoviridae	Alphainfluenzavirus	(-) ssRNA	Altboum et al., 2014	50	single	Illumina HiSeq 2000
Influenza A strain B6	IAV	Mus musculus	inf_123	SRX335800	GSE49933	123h IAV-infected mouse lung	123	lung	infected	fragmentation followed by polyA selection (3' end capture)	mm10	A/PR/8/34(H1N1)	Orthomyxoviridae	Alphainfluenzavirus	(-) ssRNA	Altboum et al., 2014	50	single	Illumina HiSeq 2000
Influenza A strain B6	IAV	Mus musculus	inf_148	SRX335801	GSE49933	148h IAV-infected mouse lung	148	lung	infected	fragmentation followed by polyA selection (3' end capture)	mm10	A/PR/8/34(H1N1)	Orthomyxoviridae	Alphainfluenzavirus	(-) ssRNA	Altboum et al., 2014	50	single	Illumina HiSeq 2000
Influenza A strain B6	IAV	Mus musculus	inf_149	SRX335802	GSE49933	149h IAV-infected mouse lung	149	lung	infected	fragmentation followed by polyA selection (3' end capture)	mm10	A/PR/8/34(H1N1)	Orthomyxoviridae	Alphainfluenzavirus	(-) ssRNA	Altboum et al., 2014	50	single	Illumina HiSeq 2000
Murine novovirus	MNV	Mus musculus	mock_0h_1	SRX2638539	GSE96586	0h uninfected RAW 264.7 cells	0	RAW 264.7	uninfected	rRNA depletion	mm10		Caliciviridae	norovirus	(+) ssRNA	Levenson et al., 2018	75	paired, but used single	Illumina HiSeq 2500
Murine novovirus	MNV	Mus musculus	mock_0h_2	SRX2638540	GSE96586	0h uninfected RAW 264.7 cells	0	RAW 264.7	uninfected	rRNA depletion	mm10		Caliciviridae	norovirus	(+) ssRNA	Levenson et al., 2018	75	paired, but used single	Illumina HiSeq 2500
Murine novovirus	MNV	Mus musculus	inf_0h_1	SRX2638536	GSE96586	0h MNV-infected RAW 264.7 cells	0	RAW 264.7	infected	rRNA depletion	mm10		Caliciviridae	norovirus	(+) ssRNA	Levenson et al., 2018	75	paired, but used single	Illumina HiSeq 2500
Murine novovirus	MNV	Mus musculus	inf_0h_2	SRX2638537	GSE96586	0h MNV-infected RAW 264.7 cells	0	RAW 264.7	infected	rRNA depletion	mm10		Caliciviridae	norovirus	(+) ssRNA	Levenson et al., 2018	75	paired, but used single	Illumina HiSeq 2500
Murine novovirus	MNV	Mus musculus	inf_0h_3	SRX2638538	GSE96586	0h MNV-infected RAW 264.7 cells	0	RAW 264.7	infected	rRNA depletion	mm10		Caliciviridae	norovirus	(+) ssRNA	Levenson et al., 2018	75	paired, but used single	Illumina HiSeq 2500
Murine novovirus	MNV	Mus musculus	inf_8h_1	SRX2638541	GSE96586	8h MNV-infected RAW 264.7 cells	8	RAW 264.7	infected	rRNA depletion	mm10		Caliciviridae	norovirus	(+) ssRNA	Levenson et al., 2018	75	paired, but used single	Illumina HiSeq 2500
Murine novovirus	MNV	Mus musculus	inf_8h_2	SRX2638542	GSE96586	8h MNV-infected RAW 264.7 cells	8	RAW 264.7	infected	rRNA depletion	mm10		Caliciviridae	norovirus	(+) ssRNA	Levenson et al., 2018	75	paired, but used single	Illumina HiSeq 2500
Murine novovirus	MNV	Mus musculus	inf_8h_3	SRX2638543	GSE96586	8h MNV-infected RAW 264.7 cells	8	RAW 264.7	infected	rRNA depletion	mm10		Caliciviridae	norovirus	(+) ssRNA	Levenson et al., 2018	75	paired, but used single	Illumina HiSeq 2500
Murine novovirus	MNV	Mus musculus	inf_14h_1	SRX2638544	GSE96586	14h MNV-infected RAW 264.7 cells	14	RAW 264.7	infected	rRNA depletion	mm10		Caliciviridae	norovirus	(+) ssRNA	Levenson et al., 2018	75	paired, but used single	Illumina HiSeq 2500
Murine novovirus	MNV	Mus musculus	inf_14h_2	SRX2638545	GSE96586	14h MNV-infected RAW 264.7 cells	14	RAW 264.7	infected	rRNA depletion	mm10		Caliciviridae	norovirus	(+) ssRNA	Levenson et al., 2018	75	paired, but used single	Illumina HiSeq 2500
Murine novovirus	MNV	Mus musculus	inf_14h_3	SRX2638546	GSE96586	14h MNV-infected RAW 264.7 cells	14	RAW 264.7	infected	rRNA depletion	mm10		Caliciviridae	norovirus	(+) ssRNA	Levenson et al., 2018	75	paired, but used single	Illumina HiSeq 2500
Murine novovirus	MNV	Mus musculus	inf_20h_1	SRX2638547	GSE96586	20h MNV-infected RAW 264.7 cells	20	RAW 264.7	infected	rRNA depletion	mm10		Caliciviridae	norovirus	(+) ssRNA	Levenson et al., 2018	75	paired, but used single	Illumina HiSeq 2500
Murine novovirus	MNV	Mus musculus	inf_20h_2	SRX2638548	GSE96586	8h MNV-infected RAW 264.7 cells	20	RAW 264.7	infected	rRNA depletion	mm10		Caliciviridae	norovirus	(+) ssRNA	Levenson et al., 2018	75	paired, but used single	Illumina HiSeq 2500
Murine novovirus	MNV	Mus musculus	inf_20h_3	SRX2638549	GSE96586	8h MNV-infected RAW 264.7 cells	20	RAW 264.7	infected	rRNA depletion	mm10		Caliciviridae	norovirus	(+) ssRNA	Levenson et al., 2018	75	paired, but used single	Illumina HiSeq 2500
Influenza A H3N2	IAV	Homo sapiens	mock_1h_1	SRX703451	GSE61517	uninfected bronchial epithelial BEAS-2B cells	1	BEAS-2B	uninfected	rRNA depletion	mm10	NA	Orthomyxoviridae	Alphainfluenzavirus	(-) ssRNA	Fabozzi et al., 2018	50	single	Illumina HiSeq 2000
Influenza A H3N2	IAV	Homo sapiens	mock_1h_2	SRX703452	GSE61517	uninfected bronchial epithelial BEAS-2B cells	1	BEAS-2B	uninfected	rRNA depletion	mm10	NA	Orthomyxoviridae	Alphainfluenzavirus	(-) ssRNA	Fabozzi et al., 2018	50	single	Illumina HiSeq 2000
Influenza A H3N2	IAV	Homo sapiens	mock_1h_3	SRX703453	GSE61517	uninfected bronchial epithelial BEAS-2B cells	1	BEAS-2B	uninfected	rRNA depletion	mm10	NA	Orthomyxoviridae	Alphainfluenzavirus	(-) ssRNA	Fabozzi et al., 2018	50	single	Illumina HiSeq 2000
Influenza A H3N2 Brisban	IAV	Homo sapiens	inf_1h_1	SRX703460	GSE61517	1h IAV brisban-infected bronchial epithelial BEAS-2B cells	1	BEAS-2B	infected	rRNA depletion	mm10	Brisbane/10/07	Orthomyxoviridae	Alphainfluenzavirus	(-) ssRNA	Fabozzi et al., 2018	50	single	Illumina HiSeq 2000
Influenza A H3N2 Brisban	IAV	Homo sapiens	inf_1h_2	SRX703461	GSE61517	1h IAV brisban-infected bronchial epithelial BEAS-2B cells	1	BEAS-2B	infected	rRNA depletion	mm10	Brisbane/10/07	Orthomyxoviridae	Alphainfluenzavirus	(-) ssRNA	Fabozzi et al., 2018	50	single	Illumina HiSeq 2000
Influenza A H3N2 Brisban	IAV	Homo sapiens	inf_1h_3	SRX703462	GSE61517	1h IAV brisban-infected bronchial epithelial BEAS-2B cells	1	BEAS-2B	infected	rRNA depletion	mm10	Brisbane/10/07	Orthomyxoviridae	Alphainfluenzavirus	(-) ssRNA	Fabozzi et al., 2018	50	single	Illumina HiSeq 2000
Influenza A H3N2 Brisban	IAV	Homo sapiens	inf_6h_1	SRX703463	GSE61517	6h IAV brisban-infected bronchial epithelial BEAS-2B cells	6	BEAS-2B	infected	rRNA depletion	mm10	Brisbane/10/07	Orthomyxoviridae	Alphainfluenzavirus	(-) ssRNA	Fabozzi et al., 2018	50	single	Illumina HiSeq 2000
Influenza A H3N2 Brisban	IAV	Homo sapiens	inf_6h_2	SRX703464	GSE61517	6h IAV brisban-infected bronchial epithelial BEAS-2B cells	6	BEAS-2B	infected	rRNA depletion	mm10	Brisbane/10/07	Orthomyxoviridae	Alphainfluenzavirus	(-) ssRNA	Fabozzi et al., 2018	50	single	Illumina HiSeq 2000
Influenza A H3N2 Brisban	IAV	Homo sapiens	inf_6h_3	SRX703465	GSE61517	6h IAV brisban-infected bronchial epithelial BEAS-2B cells	6	BEAS-2B	infected	rRNA depletion	mm10	Brisbane/10/07	Orthomyxoviridae	Alphainfluenzavirus	(-) ssRNA	Fabozzi et al., 2018	50	single	Illumina HiSeq 2000
Influenza A H3N2 Brisban	IAV	Homo sapiens	inf_24h_1	SRX703466	GSE61517	24h IAV brisban-infected bronchial epithelial BEAS-2B cells	24	BEAS-2B	infected	rRNA depletion	mm10	Brisbane/10/07	Orthomyxoviridae	Alphainfluenzavirus	(-) ssRNA	Fabozzi et al., 2018	50	single	Illumina HiSeq 2000
Influenza A H3N2 Brisban	IAV	Homo sapiens	inf_24h_2	SRX703467	GSE61517	24h IAV brisban-infected bronchial epithelial BEAS-2B cells	24	BEAS-2B	infected	rRNA depletion	mm10	Brisbane/10/07	Orthomyxoviridae	Alphainfluenzavirus	(-) ssRNA	Fabozzi et al., 2018	50	single	Illumina HiSeq 2000
Influenza A H3N2 Brisban	IAV	Homo sapiens	inf_24h_3	SRX703468	GSE61517	24h IAV brisban-infected bronchial epithelial BEAS-2B cells	24	BEAS-2B	infected	rRNA depletion	mm10	Brisbane/10/07	Orthomyxoviridae	Alphainfluenzavirus	(-) ssRNA	Fabozzi et al., 2018	50	single	Illumina HiSeq 2000
Influenza A H3N2 Udorn	IAV	Homo sapiens	inf_1h_1	SRX703476	GSE61517	1h IAV Udorn-infected bronchial epithelial BEAS-2B cells	1	BEAS-2B	infected	rRNA depletion	mm10	Udorn/307/72	Orthomyxoviridae	Alphainfluenzavirus	(-) ssRNA	Fabozzi et al., 2018	50	single	Illumina HiSeq 2000
Influenza A H3N2 Udorn	IAV	Homo sapiens	inf_1h_2	SRX703477	GSE61517	1h IAV Udorn-infected bronchial epithelial BEAS-2B cells	1	BEAS-2B	infected	rRNA depletion	mm10	Udorn/307/72	Orthomyxoviridae	Alphainfluenzavirus	(-) ssRNA	Fabozzi et al., 2018	50	single	Illumina HiSeq 2000
Influenza A H3N2 Udorn	IAV	Homo sapiens	inf_1h_3	SRX703478	GSE61517	1h IAV Udorn-infected bronchial epithelial BEAS-2B cells	1	BEAS-2B	infected	rRNA depletion	mm10	Udorn/307/72	Orthomyxoviridae	Alphainfluenzavirus	(-) ssRNA	Fabozzi et al., 2018	50	single	Illumina HiSeq 2000
Influenza A H3N2 Udorn	IAV	Homo sapiens	inf_6h_1	SRX703479	GSE61517	6h IAV Udorn-infected bronchial epithelial BEAS-2B cells	6	BEAS-2B	infected	rRNA depletion	mm10	Udorn/307/72	Orthomyxoviridae	Alphainfluenzavirus	(-) ssRNA	Fabozzi et al., 2018	50	single	Illumina HiSeq 2000
Influenza A H3N2 Udorn	IAV	Homo sapiens	inf_6h_2	SRX703480	GSE61517	6h IAV Udorn-infected bronchial epithelial BEAS-2B cells	6	BEAS-2B	infected	rRNA depletion	mm10	Udorn/307/72	Orthomyxoviridae	Alphainfluenzavirus	(-) ssRNA	Fabozzi et al., 2018	50	single	Illumina HiSeq 2000
Influenza A H3N2 Udorn	IAV	Homo sapiens	inf_6h_3	SRX703481	GSE61517	6h IAV Udorn-infected bronchial epithelial BEAS-2B cells	6	BEAS-2B	infected	rRNA depletion	mm10	Udorn/307/72	Orthomyxoviridae	Alphainfluenzavirus	(-) ssRNA	Fabozzi et al., 2018	50	single	Illumina HiSeq 2000
Influenza A H3N2 Udorn	IAV	Homo sapiens	inf_24h_1	SRX703482	GSE61517	24h IAV Udorn-infected bronchial epithelial BEAS-2B cells	24	BEAS-2B	infected	rRNA depletion	mm10	Udorn/307/72	Orthomyxoviridae	Alphainfluenzavirus	(-) ssRNA	Fabozzi et al., 2018	50	single	Illumina HiSeq 2000
Influenza A H3N2 Udorn	IAV	Homo sapiens	inf_24h_2	SRX703483	GSE61517	24h IAV Udorn-infected bronchial epithelial BEAS-2B cells	24	BEAS-2B	infected	rRNA depletion	mm10	Udorn/307/72	Orthomyxoviridae	Alphainfluenzavirus	(-) ssRNA	Fabozzi et al., 2018	50	single	Illumina HiSeq 2000
Influenza A H3N2 Udorn	IAV	Homo sapiens	inf_24h_3	SRX703484	GSE61517	24h IAV Udorn-infected bronchial epithelial BEAS-2B cells	24	BEAS-2B	infected	rRNA depletion	mm10	Udorn/307/72	Orthomyxoviridae	Alphainfluenzavirus	(-) ssRNA	Fabozzi et al., 2018	50	single	Illumina HiSeq 2000
Influenza A H3N2 Perth	IAV	Homo sapiens	inf_1h_1	SRX703449	GSE61517	1h IAV Perth-infected bronchial epithelial BEAS-2B cells	1	BEAS-2B	infected	rRNA depletion	mm10	Perth/16/09	Orthomyxoviridae	Alphainfluenzavirus	(-) ssRNA	Fabozzi et al., 2018	50	single	Illumina HiSeq 2000
Influenza A H3N2 Perth	IAV	Homo sapiens	inf_1h_2	SRX703450	GSE61517	1h IAV Perth-infected bronchial epithelial BEAS-2B cells	1	BEAS-2B	infected	rRNA depletion	mm10	Perth/16/09	Orthomyxoviridae	Alphainfluenzavirus	(-) ssRNA	Fabozzi et al., 2018	50	single	Illumina HiSeq 2000
Influenza A H3N2 Perth	IAV	Homo sapiens	inf_1h_3	SRX703451	GSE61517	1h IAV Perth-infected bronchial epithelial BEAS-2B cells	1	BEAS-2B	infected	rRNA depletion	mm10	Perth/16/09	Orthomyxoviridae	Alphainfluenzavirus	(-) ssRNA	Fabozzi et al., 2018	50	single	Illumina HiSeq 2000
Influenza A H3N2 Perth	IAV	Homo sapiens	inf_6h_1	SRX703452	GSE61517	6h IAV Perth-infected bronchial epithelial BEAS-2B cells	6	BEAS-2B	infected	rRNA depletion	mm10	Perth/16/09	Orthomyxoviridae	Alphainfluenzavirus	(-) ssRNA	Fabozzi et al., 2018	50	single	Illumina HiSeq 2000
Influenza A H3N2 Perth	IAV	Homo sapiens	inf_6h_2	SRX703453	GSE61517	6h IAV Perth-infected bronchial epithelial BEAS-2B cells	6	BEAS-2B	infected	rRNA depletion	mm10	Perth/16/09	Orthomyxoviridae	Alphainfluenzavirus	(-) ssRNA	Fabozzi et al., 2018	50	single	Illumina HiSeq 2000
Influenza A H3N2 Perth	IAV	Homo sapiens	inf_6h_3	SRX703454	GSE61517	6h IAV Perth-infected bronchial epithelial BEAS-2B cells	6	BEAS-2B	infected	rRNA depletion	mm10	Perth/16/09	Orthomyxoviridae	Alphainfluenzavirus	(-) ssRNA	Fabozzi et al., 2018	50	single	Illumina HiSeq 2000
Influenza A H3N2 Perth	IAV	Homo sapiens	inf_24h_1	SRX703455	GSE61517	24h IAV Perth-infected bronchial epithelial BEAS-2B cells	24	BEAS-2B	infected	rRNA depletion	mm10	Perth/16/09	Orthomyxoviridae	Alphainfluenzavirus	(-) ssRNA	Fabozzi et al., 2018	50	single	Illumina HiSeq 2000
Influenza A H3N2 Perth	IAV	Homo sapiens	inf_24h_2	SRX703456	GSE61517	24h IAV Perth-infected bronchial epithelial BEAS-2B cells	24	BEAS-2B	infected	rRNA depletion	mm10	Perth/16/09	Orthomyxoviridae	Alphainfluenzavirus	(-) ssRNA	Fabozzi et al., 2018	50	single	Illumina HiSeq 2000
Influenza A H3N2 Perth	IAV	Homo sapiens	inf_24h_3	SRX703457	GSE61517	24h IAV Perth-infected bronchial epithelial BEAS-2B cells	24	BEAS-2B	infected	rRNA depletion	mm10	Perth/16/09	Orthomyxoviridae	Alphainfluenzavirus	(-) ssRNA	Fabozzi et al., 2018	50	single	Illumina HiSeq 2000
