# Supplementary material for: Virus-induced transposable element expression up-regulation in human and mouse host cells
Source: Life Sci Alliance. 2020 Jan 21;3(2):e201900536. doi: 10.26508/lsa.201900536 (PMC6977392; doi:10.26508/lsa.201900536)
Supplement: Supplementary file 3 [file LSA-2019-00536_TableS3.xlsx]

## Sheet: mm10.TEtrans.genes.FDR0.05
# TEtranscripts DE gene results for mouse virus data sets
# mm10; TEtranscripts; gene quantification; FDR < 0.05
Ensembl gene ID	H5N1	H5N8	HSV-1_DRG	HSV-1_LIM	IAVaecii	IAVam	IAVcc	IAVcd103	IBV	LCMV	MCMV	MCV	MHV68	WNV_12hpi	WNV	totDE	DEup	DEdown	notDE
ENSMUSG00000026104	1	1	1	1	1	1	1	1	1	1	1	1	1	1	1	15	15	0	0
ENSMUSG00000054072	1	1	1	1	1	1	1	1	1	1	1	0	1	1	1	14	14	0	1
ENSMUSG00000034459	1	1	1	1	1	1	1	1	0	1	1	1	1	1	1	14	14	0	1
ENSMUSG00000070327	1	1	1	1	1	1	1	1	1	1	1	0	1	1	1	14	14	0	1
ENSMUSG00000040033	1	1	0	1	1	1	1	1	1	1	1	1	1	1	1	14	14	0	1
ENSMUSG00000040296	1	1	1	1	1	1	1	1	1	1	0	1	1	1	1	14	14	0	1
ENSMUSG00000034422	1	1	1	1	1	1	1	1	1	1	1	-1	1	1	1	15	14	1	0
ENSMUSG00000049502	1	1	1	1	1	1	1	1	1	1	1	0	1	1	1	14	14	0	1
ENSMUSG00000052776	1	1	1	1	1	1	1	1	1	1	1	0	1	1	1	14	14	0	1
ENSMUSG00000022906	1	1	1	1	1	1	1	1	1	1	1	0	1	1	1	14	14	0	1
ENSMUSG00000069793	1	1	1	1	1	1	1	1	1	1	1	1	0	1	1	14	14	0	1
ENSMUSG00000062488	1	1	1	1	1	1	1	1	1	1	1	0	1	1	1	14	14	0	1
ENSMUSG00000074896	1	1	1	1	1	1	1	1	1	1	1	0	1	1	1	14	14	0	1
ENSMUSG00000030921	1	1	1	1	1	1	1	1	1	1	0	0	1	1	1	13	13	0	2
ENSMUSG00000063268	1	1	1	1	0	1	1	1	1	1	1	0	1	1	1	13	13	0	2
ENSMUSG00000069892	1	1	1	1	1	1	1	1	1	1	1	0	0	1	1	13	13	0	2
ENSMUSG00000069874	1	1	1	1	1	1	1	1	1	1	-1	0	1	1	1	14	13	1	1
ENSMUSG00000028270	1	1	1	1	1	1	1	1	1	1	1	0	0	1	1	13	13	0	2
ENSMUSG00000001156	1	1	0	1	1	1	1	1	1	1	1	1	0	1	1	13	13	0	2
ENSMUSG00000040483	1	1	1	1	1	1	1	1	1	1	0	0	1	1	1	13	13	0	2
ENSMUSG00000069893	1	1	1	1	1	1	1	1	1	1	1	0	0	1	1	13	13	0	2
ENSMUSG00000047735	1	1	1	1	1	1	1	0	1	0	1	1	1	1	1	13	13	0	2
ENSMUSG00000101628	1	1	1	1	1	1	1	1	1	1	0	0	1	1	1	13	13	0	2
ENSMUSG00000104713	1	1	1	1	1	1	1	0	1	1	1	0	1	1	1	13	13	0	2
ENSMUSG00000066861	1	1	1	1	1	1	1	1	1	1	0	0	1	1	1	13	13	0	2
ENSMUSG00000105096	1	1	1	1	1	1	1	0	1	1	1	0	1	1	1	13	13	0	2
ENSMUSG00000079017	1	1	1	1	1	1	1	1	1	1	1	0	0	1	1	13	13	0	2
ENSMUSG00000037321	1	1	1	1	1	1	1	0	1	1	1	0	1	1	1	13	13	0	2
ENSMUSG00000041827	1	1	1	1	1	1	1	1	-1	1	1	1	0	1	1	14	13	1	1
ENSMUSG00000029605	1	1	0	1	1	1	1	1	1	1	1	0	1	1	1	13	13	0	2
ENSMUSG00000028268	1	1	1	1	1	1	1	0	1	1	1	0	1	1	1	13	13	0	2
ENSMUSG00000027580	1	1	1	1	0	1	1	1	1	1	1	0	1	1	1	13	13	0	2
ENSMUSG00000029826	1	1	0	1	1	1	1	1	1	1	1	0	1	1	1	13	13	0	2
ENSMUSG00000040253	1	1	1	1	1	1	1	1	1	1	1	0	0	1	1	13	13	0	2
ENSMUSG00000017830	1	1	1	1	1	1	1	1	1	1	1	0	0	1	1	13	13	0	2
ENSMUSG00000091649	1	1	1	1	1	1	1	1	1	1	1	0	0	1	1	13	13	0	2
ENSMUSG00000068245	1	1	1	1	1	1	1	1	1	1	0	0	1	1	1	13	13	0	2
ENSMUSG00000035692	1	1	1	1	1	1	1	1	1	1	0	1	0	1	1	13	13	0	2
ENSMUSG00000075602	1	1	1	1	1	1	1	1	1	1	1	-1	0	1	1	14	13	1	1
ENSMUSG00000046879	1	1	1	1	1	1	1	1	1	1	0	0	1	1	1	13	13	0	2
ENSMUSG00000049401	1	1	1	1	1	1	1	1	1	1	1	-1	0	1	1	14	13	1	1
ENSMUSG00000026896	1	1	1	1	1	1	1	1	1	1	1	0	0	1	1	13	13	0	2
ENSMUSG00000078853	1	1	1	1	1	1	1	1	1	1	-1	0	1	1	1	14	13	1	1
ENSMUSG00000029798	1	1	1	1	1	1	1	1	1	1	1	0	0	1	1	13	13	0	2
ENSMUSG00000045932	1	1	1	1	1	1	1	1	0	1	1	0	0	1	1	12	12	0	3
ENSMUSG00000001123	1	1	1	1	1	1	1	1	1	1	0	0	0	1	1	12	12	0	3
ENSMUSG00000000386	1	1	1	1	1	1	1	1	0	1	1	0	0	1	1	12	12	0	3
ENSMUSG00000048852	1	1	1	1	1	1	1	1	1	1	-1	0	0	1	1	13	12	1	2
ENSMUSG00000108112	1	1	1	1	1	1	1	1	1	1	0	0	0	1	1	12	12	0	3
ENSMUSG00000078153	1	1	1	1	1	1	1	0	1	1	1	0	0	1	1	12	12	0	3
ENSMUSG00000057596	1	1	1	1	1	1	1	1	1	1	0	0	0	1	1	12	12	0	3
ENSMUSG00000002307	1	1	0	1	1	1	1	1	1	1	1	0	0	1	1	12	12	0	3
ENSMUSG00000079491	1	1	1	1	1	1	1	0	1	1	1	0	0	1	1	12	12	0	3
ENSMUSG00000078922	1	1	1	1	1	1	1	1	1	1	-1	0	0	1	1	13	12	1	2
ENSMUSG00000020641	1	1	1	1	1	1	1	1	-1	1	1	0	0	1	1	13	12	1	2
ENSMUSG00000027514	1	1	1	1	1	1	1	1	1	1	0	0	0	1	1	12	12	0	3
ENSMUSG00000090272	1	1	1	1	0	1	0	1	1	1	1	0	1	1	1	12	12	0	3
ENSMUSG00000079363	1	1	1	1	1	1	1	0	1	1	1	0	0	1	1	12	12	0	3
ENSMUSG00000079362	1	1	1	1	1	1	1	0	1	1	1	0	0	1	1	12	12	0	3
ENSMUSG00000028037	1	1	1	1	1	0	1	1	0	1	1	0	1	1	1	12	12	0	3
ENSMUSG00000033355	1	1	1	1	1	1	1	1	-1	1	0	0	1	1	1	13	12	1	2
ENSMUSG00000044703	1	1	1	1	1	1	1	1	0	1	1	0	0	1	1	12	12	0	3
ENSMUSG00000029298	1	1	1	1	1	1	1	0	1	1	1	0	0	1	1	12	12	0	3
ENSMUSG00000034855	1	1	1	1	1	1	1	1	0	1	0	1	0	1	1	12	12	0	3
ENSMUSG00000032661	1	1	1	1	0	1	1	1	1	1	-1	0	1	1	1	13	12	1	2
ENSMUSG00000027951	1	1	0	1	1	1	1	1	1	1	0	0	1	1	1	12	12	0	3
ENSMUSG00000025498	1	1	1	1	1	1	1	1	1	1	0	0	0	1	1	12	12	0	3
ENSMUSG00000024079	1	1	0	1	1	1	1	1	0	1	1	0	1	1	1	12	12	0	3
ENSMUSG00000072620	1	1	1	1	1	1	1	1	1	1	0	0	0	1	1	12	12	0	3
ENSMUSG00000035208	1	1	1	1	1	1	0	1	0	1	1	0	1	1	1	12	12	0	3
ENSMUSG00000035929	1	1	1	1	1	1	1	0	1	1	1	-1	0	1	1	13	12	1	2
ENSMUSG00000023341	1	1	1	1	1	1	1	1	-1	1	0	0	1	1	1	13	12	1	2
ENSMUSG00000032508	1	1	1	1	1	1	1	1	1	0	1	0	-1	1	1	13	12	1	2
ENSMUSG00000030107	1	1	1	1	1	1	1	1	-1	1	0	0	1	1	1	13	12	1	2
ENSMUSG00000091144	1	1	1	1	1	1	1	1	1	1	0	0	0	1	1	12	12	0	3
ENSMUSG00000046718	1	1	1	1	1	1	1	1	1	1	-1	0	0	1	1	13	12	1	2
ENSMUSG00000037921	1	1	0	1	1	1	1	1	1	1	0	0	1	1	1	12	12	0	3
ENSMUSG00000029561	1	1	1	1	1	1	1	1	0	1	0	0	1	1	1	12	12	0	3
ENSMUSG00000026222	1	1	1	1	1	1	1	1	1	0	0	0	1	1	1	12	12	0	3
ENSMUSG00000027639	1	1	1	1	1	1	1	1	1	1	0	0	0	1	1	12	12	0	3
ENSMUSG00000078606	1	1	1	1	1	1	0	1	1	0	1	0	0	1	1	11	11	0	4
ENSMUSG00000073409	1	1	1	1	1	1	1	0	1	1	0	-1	0	1	1	12	11	1	3
ENSMUSG00000022587	1	1	1	1	1	1	1	0	1	1	-1	0	0	1	1	12	11	1	3
ENSMUSG00000034438	1	1	1	1	1	0	1	0	1	1	1	0	0	1	1	11	11	0	4
ENSMUSG00000033538	1	1	1	1	0	1	0	1	0	1	1	1	0	1	1	11	11	0	4
ENSMUSG00000060519	1	1	1	1	0	1	1	1	-1	1	0	0	1	1	1	12	11	1	3
ENSMUSG00000022014	1	1	1	1	0	1	1	0	1	1	1	0	0	1	1	11	11	0	4
ENSMUSG00000030966	1	1	1	1	1	1	1	1	1	0	-1	0	0	1	1	12	11	1	3
ENSMUSG00000015312	1	0	0	1	1	1	1	0	1	1	1	1	-1	1	1	12	11	1	3
ENSMUSG00000056116	1	1	1	1	1	1	1	0	1	1	0	0	0	1	1	11	11	0	4
ENSMUSG00000066258	1	0	1	1	1	1	1	1	1	0	1	0	0	1	1	11	11	0	4
ENSMUSG00000039501	1	1	0	1	1	1	1	1	-1	1	1	0	0	1	1	12	11	1	3
ENSMUSG00000058163	1	1	0	1	1	1	1	1	0	1	1	0	0	1	1	11	11	0	4
ENSMUSG00000035042	1	1	1	1	1	1	0	0	1	1	1	0	0	1	1	11	11	0	4
ENSMUSG00000107736	1	1	1	1	1	1	1	1	-1	1	0	0	0	1	1	12	11	1	3
ENSMUSG00000078920	1	1	1	1	1	1	1	1	0	1	-1	0	0	1	1	12	11	1	3
ENSMUSG00000078921	1	1	1	1	1	1	1	1	-1	1	-1	0	0	1	1	13	11	2	2
ENSMUSG00000039236	1	1	0	1	1	1	1	1	-1	1	1	0	0	1	1	12	11	1	3
ENSMUSG00000061232	1	1	1	1	1	1	1	0	1	1	-1	-1	0	1	1	13	11	2	2
ENSMUSG00000045868	1	1	1	1	1	1	0	1	1	0	1	0	0	1	1	11	11	0	4
ENSMUSG00000109408	1	1	0	1	0	1	0	1	1	1	1	0	1	1	1	11	11	0	4
ENSMUSG00000024338	1	1	1	1	1	1	1	0	1	1	0	0	0	1	1	11	11	0	4
ENSMUSG00000024339	1	1	1	1	1	1	1	0	0	1	1	0	0	1	1	11	11	0	4
ENSMUSG00000018899	1	1	1	1	1	1	1	0	1	0	0	1	0	1	1	11	11	0	4
ENSMUSG00000050565	1	1	0	1	1	1	1	1	1	1	0	0	0	1	1	11	11	0	4
ENSMUSG00000096727	1	1	1	1	0	1	1	0	1	1	1	0	0	1	1	11	11	0	4
ENSMUSG00000020572	1	1	0	1	1	1	1	1	1	1	0	0	0	1	1	11	11	0	4
ENSMUSG00000067212	1	1	1	1	1	1	1	0	1	1	0	0	0	1	1	11	11	0	4
ENSMUSG00000079197	1	1	1	1	1	1	1	0	1	1	-1	0	0	1	1	12	11	1	3
ENSMUSG00000079339	1	1	1	1	0	1	1	1	0	1	1	0	0	1	1	11	11	0	4
ENSMUSG00000073555	1	1	1	1	1	1	1	0	1	1	0	0	0	1	1	11	11	0	4
ENSMUSG00000038037	1	1	1	1	1	1	1	1	-1	1	-1	0	0	1	1	13	11	2	2
ENSMUSG00000027078	1	1	1	1	1	1	1	1	-1	1	0	0	0	1	1	12	11	1	3
ENSMUSG00000015340	1	1	1	1	0	0	1	1	1	1	1	-1	0	1	1	12	11	1	3
ENSMUSG00000047945	1	1	1	1	1	1	0	0	1	1	1	0	0	1	1	11	11	0	4
ENSMUSG00000042726	1	1	0	1	1	1	1	1	-1	1	1	0	0	1	1	12	11	1	3
ENSMUSG00000024308	1	1	1	1	1	1	1	0	1	1	-1	0	0	1	1	12	11	1	3
ENSMUSG00000025492	1	1	1	1	1	1	1	1	-1	1	0	0	0	1	1	12	11	1	3
ENSMUSG00000039304	1	0	1	1	1	1	1	0	1	1	1	0	0	1	1	11	11	0	4
ENSMUSG00000016496	1	1	1	1	1	1	1	1	-1	1	-1	0	0	1	1	13	11	2	2
ENSMUSG00000060802	1	1	1	1	1	1	1	0	1	1	-1	-1	0	1	1	13	11	2	2
ENSMUSG00000049734	1	1	0	1	1	1	1	1	0	1	1	0	0	1	1	11	11	0	4
ENSMUSG00000105383	1	1	0	1	1	1	1	1	0	1	1	0	0	1	1	11	11	0	4
ENSMUSG00000033880	1	1	1	1	1	1	1	1	-1	1	0	0	0	1	1	12	11	1	3
ENSMUSG00000062593	1	1	1	1	0	1	1	1	1	1	0	0	0	1	1	11	11	0	4
ENSMUSG00000073489	1	1	1	1	0	1	0	1	0	1	1	0	1	1	1	11	11	0	4
ENSMUSG00000019850	1	1	1	1	1	0	1	0	1	1	1	1	0	0	1	11	11	0	4
ENSMUSG00000020638	1	1	1	1	1	1	1	1	-1	1	0	0	0	1	1	12	11	1	3
ENSMUSG00000039997	1	1	1	1	0	1	0	1	0	1	1	0	1	1	1	11	11	0	4
ENSMUSG00000012519	1	1	1	1	1	1	0	0	1	1	1	0	0	1	1	11	11	0	4
ENSMUSG00000028793	1	1	0	1	1	1	1	0	1	1	1	0	0	1	1	11	11	0	4
ENSMUSG00000092550	1	1	1	1	1	1	1	0	1	1	0	0	0	1	1	11	11	0	4
ENSMUSG00000032690	1	1	0	1	0	1	1	1	1	1	0	1	0	1	1	11	11	0	4
ENSMUSG00000023307	1	1	0	1	1	1	1	1	1	0	1	0	0	1	1	11	11	0	4
ENSMUSG00000024677	1	1	1	1	0	1	0	1	1	1	1	0	0	1	1	11	11	0	4
ENSMUSG00000092021	1	1	1	1	1	1	1	0	0	1	0	0	0	1	1	10	10	0	5
ENSMUSG00000022586	1	1	1	1	1	1	1	0	1	0	0	0	0	1	1	10	10	0	5
ENSMUSG00000043263	1	1	1	1	0	1	0	1	0	1	1	0	0	1	1	10	10	0	5
ENSMUSG00000106734	1	1	0	1	1	1	0	0	1	1	0	0	1	1	1	10	10	0	5
ENSMUSG00000057143	1	1	1	1	0	0	1	0	1	1	0	0	1	1	1	10	10	0	5
ENSMUSG00000074151	1	1	1	1	0	1	0	0	1	1	1	0	0	1	1	10	10	0	5
ENSMUSG00000020089	1	1	0	1	1	1	1	1	1	1	-1	0	0	1	0	11	10	1	4
ENSMUSG00000070034	1	1	1	1	1	1	1	1	0	0	0	0	0	1	1	10	10	0	5
ENSMUSG00000003283	1	1	1	1	1	1	0	0	1	1	0	0	0	1	1	10	10	0	5
ENSMUSG00000037447	1	1	0	1	1	1	1	1	0	0	-1	1	0	1	1	11	10	1	4
ENSMUSG00000060550	1	1	1	1	1	0	1	0	1	1	0	0	0	1	1	10	10	0	5
ENSMUSG00000019082	1	1	0	1	1	1	1	1	-1	1	0	0	0	1	1	11	10	1	4
ENSMUSG00000024066	1	1	0	1	-1	1	0	1	1	1	1	0	0	1	1	11	10	1	4
ENSMUSG00000002325	1	1	0	1	1	1	1	0	0	1	-1	0	1	1	1	11	10	1	4
ENSMUSG00000024472	1	0	0	1	1	1	0	0	-1	1	1	1	1	1	1	11	10	1	4
ENSMUSG00000079018	1	1	0	1	0	1	1	0	1	1	1	-1	0	1	1	11	10	1	4
ENSMUSG00000075010	1	1	1	1	1	1	1	0	-1	1	-1	0	0	1	1	12	10	2	3
ENSMUSG00000055413	1	1	1	1	1	0	1	0	1	1	0	-1	0	1	1	11	10	1	4
ENSMUSG00000040613	1	1	1	1	0	1	1	0	1	1	0	1	0	0	1	10	10	0	5
ENSMUSG00000046805	1	1	1	1	1	0	1	0	1	1	1	0	0	0	1	10	10	0	5
ENSMUSG00000021281	1	1	1	1	1	0	1	0	1	1	1	1	0	-1	0	11	10	1	4
ENSMUSG00000054203	1	1	1	1	0	1	0	1	0	1	1	0	0	1	1	10	10	0	5
ENSMUSG00000073491	1	1	1	1	0	1	0	1	0	1	1	0	0	1	1	10	10	0	5
ENSMUSG00000009585	1	0	1	1	1	1	1	0	1	0	1	0	0	1	1	10	10	0	5
ENSMUSG00000021871	1	1	1	1	1	1	0	1	-1	1	0	0	0	1	1	11	10	1	4
ENSMUSG00000040328	1	1	1	1	1	1	1	1	0	0	0	0	0	1	1	10	10	0	5
ENSMUSG00000037580	1	1	0	1	1	1	1	1	-1	0	-1	1	0	1	1	12	10	2	3
ENSMUSG00000038213	1	1	1	1	1	1	1	0	1	0	-1	0	0	1	1	11	10	1	4
ENSMUSG00000033487	1	0	0	1	0	1	0	1	1	1	1	1	0	1	1	10	10	0	5
ENSMUSG00000067235	1	1	0	1	1	0	1	0	1	1	1	-1	0	1	1	11	10	1	4
ENSMUSG00000090186	1	1	0	1	1	1	1	1	0	1	0	0	0	1	1	10	10	0	5
ENSMUSG00000022867	1	1	0	1	0	1	0	1	1	1	1	0	0	1	1	10	10	0	5
ENSMUSG00000081512	1	1	1	1	1	1	1	0	0	1	0	0	0	1	1	10	10	0	5
ENSMUSG00000073411	1	1	1	1	1	0	1	0	1	1	-1	-1	0	1	1	12	10	2	3
ENSMUSG00000071350	1	1	0	1	0	1	0	1	1	1	1	0	0	1	1	10	10	0	5
ENSMUSG00000032596	1	1	1	1	0	1	1	0	1	1	0	0	0	1	1	10	10	0	5
ENSMUSG00000002983	1	0	0	1	1	1	1	0	1	1	0	1	0	1	1	10	10	0	5
ENSMUSG00000026536	1	1	1	1	0	1	0	1	0	1	1	0	0	1	1	10	10	0	5
ENSMUSG00000105504	1	1	1	1	1	1	1	0	0	1	0	0	0	1	1	10	10	0	5
ENSMUSG00000006418	1	1	0	1	0	1	1	0	1	1	0	1	0	1	1	10	10	0	5
ENSMUSG00000082292	1	1	1	1	0	1	1	1	0	1	0	0	0	1	1	10	10	0	5
ENSMUSG00000036986	1	1	0	1	1	1	1	1	0	1	0	0	0	1	1	10	10	0	5
ENSMUSG00000070501	1	1	1	1	0	1	0	1	0	1	1	0	0	1	1	10	10	0	5
ENSMUSG00000029366	1	1	0	1	0	1	0	1	1	1	1	0	0	1	1	10	10	0	5
ENSMUSG00000054676	1	1	0	1	0	1	0	1	1	1	1	0	0	1	1	10	10	0	5
ENSMUSG00000068246	1	1	0	1	0	1	1	0	1	0	0	1	1	1	1	10	10	0	5
ENSMUSG00000052477	1	1	1	1	0	1	0	1	-1	1	1	0	0	1	1	11	10	1	4
ENSMUSG00000010358	1	1	1	1	1	1	0	1	-1	1	-1	0	0	1	1	12	10	2	3
ENSMUSG00000039699	1	1	1	1	0	1	1	1	1	0	0	0	0	1	1	10	10	0	5
ENSMUSG00000039697	1	0	0	1	1	1	1	0	1	1	1	0	0	1	1	10	10	0	5
ENSMUSG00000038507	1	1	0	1	1	1	1	1	0	1	0	0	0	1	1	10	10	0	5
ENSMUSG00000039531	1	1	0	1	0	1	0	1	-1	1	1	1	0	1	1	11	10	1	4
ENSMUSG00000054404	1	1	1	1	0	1	0	1	1	1	0	0	0	1	1	10	10	0	5
ENSMUSG00000016206	1	1	1	1	0	0	1	0	1	1	1	0	0	1	1	10	10	0	5
ENSMUSG00000026466	1	1	0	1	0	1	1	1	1	1	0	0	0	1	1	10	10	0	5
ENSMUSG00000078763	1	1	1	1	0	1	0	1	0	1	1	0	0	1	1	10	10	0	5
ENSMUSG00000063286	1	1	1	1	0	1	0	1	1	0	1	0	0	1	1	10	10	0	5
ENSMUSG00000032712	1	0	0	1	1	1	1	0	1	0	1	1	0	1	1	10	10	0	5
ENSMUSG00000079457	1	1	0	1	0	1	1	1	0	1	0	0	1	1	1	10	10	0	5
ENSMUSG00000072109	1	1	1	1	0	1	0	1	0	1	1	0	0	1	1	10	10	0	5
ENSMUSG00000022216	1	1	1	1	1	1	0	0	1	1	0	-1	0	1	1	11	10	1	4
ENSMUSG00000024679	1	1	1	1	0	1	0	1	0	1	1	0	0	1	1	10	10	0	5
ENSMUSG00000023952	1	0	0	1	1	1	0	0	1	1	1	1	0	1	1	10	10	0	5
ENSMUSG00000073405	1	1	0	1	1	0	1	0	1	0	1	-1	0	1	1	10	9	1	5
ENSMUSG00000056290	1	1	1	1	0	1	0	1	0	1	0	0	0	1	1	9	9	0	6
ENSMUSG00000022584	1	1	1	1	0	0	1	0	1	1	1	0	0	0	1	9	9	0	6
ENSMUSG00000038467	1	1	0	1	1	1	0	0	0	1	1	0	0	1	1	9	9	0	6
ENSMUSG00000112023	1	1	1	1	0	1	0	0	1	1	0	0	0	1	1	9	9	0	6
ENSMUSG00000002227	1	1	0	1	0	1	1	1	-1	1	0	0	0	1	1	10	9	1	5
ENSMUSG00000078349	1	1	0	1	1	1	1	0	0	1	0	0	0	1	1	9	9	0	6
ENSMUSG00000037405	1	0	1	1	1	1	1	0	1	0	0	0	0	1	1	9	9	0	6
ENSMUSG00000023067	1	0	0	1	1	0	1	1	-1	1	0	1	0	1	1	10	9	1	5
ENSMUSG00000070031	1	0	0	1	0	1	0	1	1	1	1	0	0	1	1	9	9	0	6
ENSMUSG00000094127	1	1	1	1	0	1	0	1	1	0	0	0	0	1	1	9	9	0	6
ENSMUSG00000018930	1	1	1	1	0	1	0	1	0	1	0	0	0	1	1	9	9	0	6
ENSMUSG00000053835	1	1	0	1	0	1	1	0	0	1	1	0	0	1	1	9	9	0	6
ENSMUSG00000095649	1	1	1	1	0	1	0	1	0	0	1	0	0	1	1	9	9	0	6
ENSMUSG00000025647	1	1	1	1	0	0	1	0	1	1	-1	0	0	1	1	10	9	1	5
ENSMUSG00000090215	1	1	1	1	0	0	1	0	0	1	0	0	1	1	1	9	9	0	6
ENSMUSG00000095609	1	1	1	1	0	1	0	1	0	1	0	0	0	1	1	9	9	0	6
ENSMUSG00000097194	1	1	0	1	1	1	1	1	0	0	0	0	0	1	1	9	9	0	6
ENSMUSG00000038866	1	1	0	1	0	0	0	0	1	1	1	1	0	1	1	9	9	0	6
ENSMUSG00000086347	1	1	0	1	1	1	1	0	0	1	0	0	0	1	1	9	9	0	6
ENSMUSG00000041736	1	1	1	1	0	1	0	1	1	0	-1	-1	-1	1	1	12	9	3	3
ENSMUSG00000039682	1	1	0	1	1	1	1	1	1	1	-1	0	0	0	0	10	9	1	5
ENSMUSG00000090231	1	1	1	1	0	1	0	0	1	1	0	0	0	1	1	9	9	0	6
ENSMUSG00000039232	1	0	0	1	1	1	1	0	1	0	0	1	0	1	1	9	9	0	6
ENSMUSG00000000204	1	1	1	1	0	1	0	1	0	1	0	0	0	1	1	9	9	0	6
ENSMUSG00000021242	1	0	0	1	1	1	0	1	1	1	0	0	0	1	1	9	9	0	6
ENSMUSG00000067297	1	1	0	1	1	1	1	1	0	0	0	0	0	1	1	9	9	0	6
ENSMUSG00000031639	1	1	0	1	1	1	1	0	1	0	0	0	0	1	1	9	9	0	6
ENSMUSG00000052837	1	1	1	1	0	0	1	0	-1	1	0	1	-1	1	1	11	9	2	4
ENSMUSG00000030156	1	1	1	1	0	1	0	1	0	1	-1	0	0	1	1	10	9	1	5
ENSMUSG00000073490	1	1	0	1	0	1	0	1	0	1	0	0	1	1	1	9	9	0	6
ENSMUSG00000022575	1	1	1	1	0	0	0	0	1	1	1	0	0	1	1	9	9	0	6
ENSMUSG00000043740	1	1	1	1	0	1	0	1	0	1	0	0	0	1	1	9	9	0	6
ENSMUSG00000061852	1	1	0	1	1	1	1	1	0	0	0	0	0	1	1	9	9	0	6
ENSMUSG00000026088	1	1	0	1	1	1	1	0	0	1	0	0	0	1	1	9	9	0	6
ENSMUSG00000039456	1	0	0	1	0	0	1	1	1	0	1	1	0	1	1	9	9	0	6
ENSMUSG00000032515	1	1	0	1	1	0	1	0	-1	1	-1	1	-1	1	1	12	9	3	3
ENSMUSG00000090881	1	1	0	1	1	1	0	1	0	1	0	0	0	1	1	9	9	0	6
ENSMUSG00000096954	1	1	0	1	0	1	1	1	0	1	0	0	0	1	1	9	9	0	6
ENSMUSG00000023947	1	1	0	1	1	1	0	0	1	0	0	1	0	1	1	9	9	0	6
ENSMUSG00000037816	1	1	0	1	0	0	1	1	-1	1	1	0	0	1	1	10	9	1	5
ENSMUSG00000057346	1	1	1	1	0	1	1	0	0	0	0	1	0	1	1	9	9	0	6
ENSMUSG00000037997	1	1	0	1	0	1	0	1	1	1	0	0	0	1	1	9	9	0	6
ENSMUSG00000056144	1	1	1	1	0	0	1	1	0	1	0	0	0	1	1	9	9	0	6
ENSMUSG00000026946	1	1	0	1	0	1	1	1	1	0	0	0	0	1	1	9	9	0	6
ENSMUSG00000029417	1	1	1	1	0	1	0	1	0	1	0	0	0	1	1	9	9	0	6
ENSMUSG00000092243	1	1	1	1	1	0	1	0	1	0	-1	-1	0	1	1	11	9	2	4
ENSMUSG00000027950	1	1	0	1	1	1	1	0	0	1	0	0	0	1	1	9	9	0	6
ENSMUSG00000079507	1	1	1	1	1	0	1	0	1	0	-1	0	0	1	1	10	9	1	5
ENSMUSG00000079505	1	1	1	1	0	0	0	0	1	1	1	0	0	1	1	9	9	0	6
ENSMUSG00000021701	-1	0	0	1	1	1	0	1	1	1	0	1	-1	1	1	11	9	2	4
ENSMUSG00000091191	1	1	1	1	1	1	1	0	0	0	0	0	0	1	1	9	9	0	6
ENSMUSG00000091199	1	1	0	1	1	1	1	1	0	0	0	0	0	1	1	9	9	0	6
ENSMUSG00000053175	1	1	1	1	1	1	1	0	1	0	0	0	0	0	1	9	9	0	6
ENSMUSG00000018920	1	0	1	1	1	1	1	0	1	0	0	0	0	1	1	9	9	0	6
ENSMUSG00000110790	1	0	1	1	1	1	1	0	1	0	0	0	0	1	1	9	9	0	6
ENSMUSG00000054520	1	1	0	1	0	0	0	0	1	1	1	1	0	1	1	9	9	0	6
ENSMUSG00000098871	1	1	1	1	0	1	1	0	0	1	0	0	0	1	1	9	9	0	6
ENSMUSG00000035517	1	1	0	1	1	1	1	1	-1	0	-1	0	0	1	1	11	9	2	4
ENSMUSG00000024014	1	1	0	1	1	1	1	0	1	0	-1	0	0	1	1	10	9	1	5
ENSMUSG00000000275	1	1	0	1	1	0	1	0	0	1	0	0	1	1	1	9	9	0	6
ENSMUSG00000079492	1	1	1	1	1	0	1	0	1	0	-1	-1	0	1	1	11	9	2	4
ENSMUSG00000022901	1	1	1	1	0	0	0	1	0	1	1	0	0	1	1	9	9	0	6
ENSMUSG00000114608	1	1	1	1	0	1	0	1	0	1	0	0	0	1	1	9	9	0	6
ENSMUSG00000032265	1	0	0	1	1	1	1	1	-1	1	0	0	0	1	1	10	9	1	5
ENSMUSG00000027995	1	1	1	1	1	0	1	0	1	0	-1	0	0	1	1	10	9	1	5
ENSMUSG00000090222	1	1	0	1	0	1	0	1	0	1	0	0	1	1	1	9	9	0	6
ENSMUSG00000035673	1	0	0	1	1	1	1	0	1	0	1	1	0	0	1	9	9	0	6
ENSMUSG00000037731	1	1	1	1	0	0	0	0	1	1	1	0	0	1	1	9	9	0	6
ENSMUSG00000038774	1	0	0	1	0	1	0	1	0	0	1	1	1	1	1	9	9	0	6
ENSMUSG00000044162	1	1	0	1	1	1	0	0	1	1	0	0	0	1	1	9	9	0	6
ENSMUSG00000015947	1	1	1	1	0	1	0	1	0	1	0	0	0	1	1	9	9	0	6
ENSMUSG00000092511	1	1	1	1	0	1	0	0	1	1	0	0	0	1	1	9	9	0	6
ENSMUSG00000024349	1	1	1	1	1	1	1	0	1	0	-1	0	-1	0	1	11	9	2	4
ENSMUSG00000039994	1	1	0	1	0	1	0	1	1	0	1	0	0	1	1	9	9	0	6
ENSMUSG00000037849	1	1	1	1	0	1	0	1	0	1	0	0	0	1	1	9	9	0	6
ENSMUSG00000037331	1	0	0	1	1	1	0	0	1	1	1	0	0	1	1	9	9	0	6
ENSMUSG00000020806	1	0	0	1	0	1	0	0	1	1	1	1	0	1	1	9	9	0	6
ENSMUSG00000021451	1	1	0	1	-1	1	0	0	1	1	1	0	0	1	1	10	9	1	5
ENSMUSG00000021453	1	1	0	1	1	0	1	0	1	0	1	1	-1	1	0	10	9	1	5
ENSMUSG00000032344	1	1	0	1	0	1	0	1	0	0	1	1	0	1	1	9	9	0	6
ENSMUSG00000101438	1	1	0	1	0	1	1	0	1	1	-1	0	0	1	1	10	9	1	5
ENSMUSG00000079455	1	1	0	1	1	1	0	1	0	1	0	0	0	1	1	9	9	0	6
ENSMUSG00000025225	1	0	1	1	1	1	1	0	1	1	0	0	0	0	1	9	9	0	6
ENSMUSG00000021025	1	1	0	1	1	0	1	0	1	0	-1	1	0	1	1	10	9	1	5
ENSMUSG00000070427	1	1	1	1	0	1	1	0	1	0	0	0	0	1	1	9	9	0	6
ENSMUSG00000032322	1	1	1	1	0	0	0	0	1	1	1	0	0	1	1	9	9	0	6
ENSMUSG00000024675	1	1	1	1	0	1	0	1	0	1	-1	0	0	1	1	10	9	1	5
ENSMUSG00000024539	1	0	0	1	1	1	1	0	1	-1	0	0	0	1	1	9	8	1	6
ENSMUSG00000073406	1	1	0	1	1	0	1	0	1	0	0	-1	0	1	1	9	8	1	6
ENSMUSG00000073402	1	1	0	1	1	0	1	0	1	0	-1	-1	0	1	1	10	8	2	5
ENSMUSG00000022052	1	0	0	1	1	1	1	0	1	0	0	1	0	1	0	8	8	0	7
ENSMUSG00000038884	1	1	0	1	0	0	0	0	1	1	1	0	0	1	1	8	8	0	7
ENSMUSG00000099757	1	1	1	1	0	1	0	0	0	0	1	0	0	1	1	8	8	0	7
ENSMUSG00000063445	1	1	0	1	0	0	0	0	1	1	1	-1	0	1	1	9	8	1	6
ENSMUSG00000024737	1	1	1	1	0	0	0	0	1	1	0	0	0	1	1	8	8	0	7
ENSMUSG00000067203	1	1	0	1	1	0	1	0	1	0	0	-1	0	1	1	9	8	1	6
ENSMUSG00000014599	1	1	0	1	1	0	1	0	1	1	0	0	0	1	0	8	8	0	7
ENSMUSG00000032724	1	0	0	1	1	1	0	1	-1	0	0	1	0	1	1	9	8	1	6
ENSMUSG00000034842	1	0	0	1	1	1	1	1	0	0	0	0	0	1	1	8	8	0	7
ENSMUSG00000022831	1	0	1	1	0	0	0	0	1	1	1	0	0	1	1	8	8	0	7
ENSMUSG00000047798	1	1	0	1	0	1	0	0	1	1	-1	0	0	1	1	9	8	1	6
ENSMUSG00000045795	1	0	0	1	1	1	0	0	-1	0	1	1	0	1	1	9	8	1	6
ENSMUSG00000093378	1	1	0	1	0	1	0	1	0	0	1	0	0	1	1	8	8	0	7
ENSMUSG00000085917	1	0	0	1	1	1	0	0	1	0	1	0	0	1	1	8	8	0	7
ENSMUSG00000020275	1	0	0	1	1	0	0	0	1	1	0	1	0	1	1	8	8	0	7
ENSMUSG00000086327	1	1	0	1	0	1	0	1	0	1	0	0	0	1	1	8	8	0	7
ENSMUSG00000049516	1	0	0	1	1	1	1	0	-1	0	1	1	0	0	1	9	8	1	6
ENSMUSG00000038642	1	1	1	1	0	0	1	0	1	1	0	0	0	0	1	8	8	0	7
ENSMUSG00000002111	1	0	1	1	0	0	1	0	1	1	1	0	0	0	1	8	8	0	7
ENSMUSG00000017652	1	0	1	1	0	1	0	1	0	1	0	0	0	1	1	8	8	0	7
ENSMUSG00000031627	1	0	0	1	1	1	0	0	1	0	1	0	0	1	1	8	8	0	7
ENSMUSG00000034575	1	1	0	1	0	1	1	0	-1	1	0	0	0	1	1	9	8	1	6
ENSMUSG00000053101	1	1	0	1	0	1	0	0	0	1	1	0	0	1	1	8	8	0	7
ENSMUSG00000063694	1	0	0	1	1	1	1	0	-1	1	-1	0	0	1	1	10	8	2	5
ENSMUSG00000019122	1	0	0	1	0	1	0	0	1	1	1	0	0	1	1	8	8	0	7
ENSMUSG00000095457	1	1	0	1	0	1	0	1	0	0	1	0	0	1	1	8	8	0	7
ENSMUSG00000033213	1	0	1	1	0	1	0	1	0	0	1	0	0	1	1	8	8	0	7
ENSMUSG00000097567	1	1	0	1	0	0	0	1	0	1	1	0	0	1	1	8	8	0	7
ENSMUSG00000051650	1	0	0	1	1	1	0	0	1	0	-1	1	0	1	1	9	8	1	6
ENSMUSG00000021133	1	0	0	1	1	1	1	0	1	0	-1	0	0	1	1	9	8	1	6
ENSMUSG00000085604	1	1	0	1	0	1	1	1	0	0	0	0	0	1	1	8	8	0	7
ENSMUSG00000043953	1	1	1	1	1	0	1	0	0	0	-1	0	0	1	1	9	8	1	6
ENSMUSG00000066677	1	1	0	1	0	1	0	1	0	1	-1	0	0	1	1	9	8	1	6
ENSMUSG00000026475	1	1	0	1	1	0	0	0	1	1	1	1	-1	0	0	9	8	1	6
ENSMUSG00000017929	1	0	0	1	0	1	1	1	-1	1	0	0	0	1	1	9	8	1	6
ENSMUSG00000034394	1	0	0	1	1	0	1	1	0	1	1	1	0	0	0	8	8	0	7
ENSMUSG00000062007	1	1	0	1	0	0	1	1	0	1	0	0	0	1	1	8	8	0	7
ENSMUSG00000083161	1	1	1	1	0	1	0	0	0	0	1	0	0	1	1	8	8	0	7
ENSMUSG00000027829	1	0	0	1	1	0	0	0	1	0	1	1	0	1	1	8	8	0	7
ENSMUSG00000042406	1	0	0	1	1	1	1	0	0	0	1	0	-1	1	1	9	8	1	6
ENSMUSG00000000732	1	0	0	1	0	1	0	0	1	1	1	0	0	1	1	8	8	0	7
ENSMUSG00000035356	1	0	0	1	1	0	1	0	1	1	0	0	-1	1	1	9	8	1	6
ENSMUSG00000091549	1	1	1	1	0	0	0	0	1	1	1	-1	1	0	0	9	8	1	6
ENSMUSG00000024789	1	0	0	1	0	1	0	0	1	1	1	0	0	1	1	8	8	0	7
ENSMUSG00000029780	1	1	0	1	1	1	0	1	-1	0	0	0	0	1	1	9	8	1	6
ENSMUSG00000090570	1	0	0	1	1	1	1	1	1	1	0	0	0	0	0	8	8	0	7
ENSMUSG00000098934	1	1	1	1	0	1	0	1	0	0	0	0	0	1	1	8	8	0	7
ENSMUSG00000008200	1	0	0	1	0	0	0	0	1	1	1	1	0	1	1	8	8	0	7
ENSMUSG00000004952	1	1	0	1	0	1	0	1	-1	1	0	0	0	1	1	9	8	1	6
ENSMUSG00000043279	1	0	0	1	0	1	0	0	1	1	1	0	0	1	1	8	8	0	7
ENSMUSG00000086513	1	1	0	1	0	1	0	1	0	0	1	0	0	1	1	8	8	0	7
ENSMUSG00000076441	1	1	0	0	0	1	0	1	-1	1	1	0	0	1	1	9	8	1	6
ENSMUSG00000046031	1	1	1	1	0	1	0	1	0	0	-1	0	0	1	1	9	8	1	6
ENSMUSG00000045210	1	0	0	1	0	1	0	1	-1	1	0	1	0	1	1	9	8	1	6
ENSMUSG00000030103	1	1	0	0	1	0	1	0	1	1	1	1	0	-1	0	9	8	1	6
ENSMUSG00000000682	1	1	1	1	0	1	1	0	0	0	0	0	0	1	1	8	8	0	7
ENSMUSG00000005413	1	1	0	1	1	1	0	0	1	1	1	0	0	0	-1	9	8	1	6
ENSMUSG00000027351	0	0	0	1	1	1	1	0	1	1	-1	0	0	1	1	9	8	1	6
ENSMUSG00000036908	1	1	1	1	0	0	1	0	-1	1	-1	0	0	1	1	10	8	2	5
ENSMUSG00000082088	1	1	0	1	1	1	0	1	-1	0	0	0	0	1	1	9	8	1	6
ENSMUSG00000028893	1	0	0	1	1	1	0	0	1	0	1	1	0	0	1	8	8	0	7
ENSMUSG00000008384	1	0	0	1	1	1	1	0	1	0	-1	1	-1	1	0	10	8	2	5
ENSMUSG00000073628	1	1	0	1	0	0	0	1	0	1	1	0	0	1	1	8	8	0	7
ENSMUSG00000044786	1	1	0	1	-1	-1	0	0	1	1	-1	1	-1	1	1	12	8	4	3
ENSMUSG00000005667	1	1	0	1	1	1	0	0	0	0	0	1	0	1	1	8	8	0	7
ENSMUSG00000022346	1	0	0	1	1	1	1	0	1	1	-1	1	0	0	-1	10	8	2	5
ENSMUSG00000026981	1	1	1	1	0	1	1	0	0	1	0	0	0	1	0	8	8	0	7
ENSMUSG00000032089	1	1	1	1	0	1	0	0	0	1	-1	0	0	1	1	9	8	1	6
ENSMUSG00000102037	1	1	1	1	0	0	0	0	1	1	1	0	0	0	1	8	8	0	7
ENSMUSG00000009035	1	0	0	1	0	0	0	1	1	1	1	0	0	1	1	8	8	0	7
ENSMUSG00000034640	1	0	0	1	1	1	0	0	-1	1	0	1	0	1	1	9	8	1	6
ENSMUSG00000018143	1	0	0	1	1	1	1	0	1	0	-1	0	-1	1	1	10	8	2	5
ENSMUSG00000031897	1	1	1	1	0	0	1	0	1	0	0	0	0	1	1	8	8	0	7
ENSMUSG00000029771	1	1	0	1	0	0	1	0	0	1	1	0	0	1	1	8	8	0	7
ENSMUSG00000034300	1	0	0	0	1	0	0	1	1	1	0	1	0	1	1	8	8	0	7
ENSMUSG00000053113	1	1	1	1	0	1	0	1	1	1	-1	0	-1	0	0	10	8	2	5
ENSMUSG00000018986	1	1	0	1	0	1	0	1	0	1	0	0	0	1	1	8	8	0	7
ENSMUSG00000038301	1	1	0	1	0	0	0	0	-1	1	1	1	0	1	1	9	8	1	6
ENSMUSG00000066363	1	1	1	1	0	0	0	1	0	1	-1	0	0	1	1	9	8	1	6
ENSMUSG00000072621	1	1	0	1	0	1	0	1	0	-1	1	0	0	1	1	9	8	1	6
ENSMUSG00000047180	1	0	1	1	1	0	1	0	0	1	-1	0	0	1	1	9	8	1	6
ENSMUSG00000050721	1	0	0	1	0	0	0	0	1	1	1	1	-1	1	1	9	8	1	6
ENSMUSG00000020400	1	0	0	1	0	1	0	0	1	1	1	1	0	0	1	8	8	0	7
ENSMUSG00000024401	1	1	0	1	1	0	1	0	0	1	0	0	0	1	1	8	8	0	7
ENSMUSG00000048163	1	0	1	1	1	0	1	0	1	0	0	0	0	1	1	8	8	0	7
ENSMUSG00000009772	1	1	1	1	1	0	1	0	1	-1	-1	0	-1	0	1	11	8	3	4
ENSMUSG00000094796	1	1	1	1	0	0	0	1	0	1	0	0	0	1	1	8	8	0	7
ENSMUSG00000073421	1	0	1	1	0	0	1	0	1	1	1	0	0	0	1	8	8	0	7
ENSMUSG00000022508	1	0	0	1	1	1	0	0	1	-1	-1	1	0	1	1	10	8	2	5
ENSMUSG00000035385	1	1	1	1	0	1	0	0	0	0	0	1	0	1	1	8	8	0	7
ENSMUSG00000079419	1	1	1	1	0	1	0	1	0	0	0	0	0	1	1	8	8	0	7
ENSMUSG00000024610	1	0	1	1	0	0	1	0	1	1	1	0	0	0	1	8	8	0	7
ENSMUSG00000089809	1	0	0	1	1	0	1	0	1	1	-1	0	0	1	1	9	8	1	6
ENSMUSG00000032715	1	0	0	1	1	1	1	0	1	0	0	1	0	0	1	8	8	0	7
ENSMUSG00000068417	1	1	0	1	1	1	0	1	-1	0	0	0	0	1	1	9	8	1	6
ENSMUSG00000000708	1	0	0	1	0	1	0	0	1	1	1	0	0	1	1	8	8	0	7
ENSMUSG00000024805	1	1	0	1	1	1	0	0	-1	1	0	0	0	1	1	9	8	1	6
ENSMUSG00000000791	1	1	1	1	0	0	0	0	0	1	1	0	1	0	1	8	8	0	7
ENSMUSG00000028494	1	0	0	1	1	0	0	0	1	1	1	1	0	0	1	8	8	0	7
ENSMUSG00000000982	1	1	0	1	0	0	1	1	0	1	0	0	0	1	1	8	8	0	7
ENSMUSG00000097815	1	0	0	1	1	1	1	0	1	1	-1	0	0	0	1	9	8	1	6
ENSMUSG00000025017	1	0	1	1	0	-1	0	1	1	1	0	0	0	1	1	9	8	1	6
ENSMUSG00000105338	1	1	1	1	0	0	0	0	0	1	1	0	0	1	1	8	8	0	7
ENSMUSG00000019970	0	0	0	1	1	0	1	0	1	0	1	1	0	1	1	8	8	0	7
ENSMUSG00000103730	1	1	0	1	0	1	0	1	-1	1	0	0	0	1	1	9	8	1	6
ENSMUSG00000006930	1	1	0	1	1	0	1	0	1	0	0	0	0	1	1	8	8	0	7
ENSMUSG00000034947	1	1	0	1	0	0	1	1	-1	1	0	0	0	1	1	9	8	1	6
ENSMUSG00000041481	1	1	0	1	0	1	0	1	0	1	-1	0	0	1	1	9	8	1	6
ENSMUSG00000071715	1	0	1	1	0	0	0	0	1	1	1	0	0	0	1	7	7	0	8
ENSMUSG00000037965	1	0	0	1	0	0	1	0	-1	0	1	1	0	1	1	8	7	1	7
ENSMUSG00000041645	1	0	0	1	1	0	0	0	1	1	0	0	0	1	1	7	7	0	8
ENSMUSG00000041135	1	0	0	1	1	1	0	1	1	0	-1	0	0	1	0	8	7	1	7
ENSMUSG00000060131	1	1	1	1	0	0	0	0	0	1	1	1	0	0	0	7	7	0	8
ENSMUSG00000097971	1	1	0	1	0	1	0	0	1	0	1	0	0	0	1	7	7	0	8
ENSMUSG00000027422	1	0	0	1	0	0	0	0	1	1	1	0	0	1	1	7	7	0	8
ENSMUSG00000024732	1	0	0	1	1	1	1	0	0	0	0	0	0	1	1	7	7	0	8
ENSMUSG00000018654	1	0	1	1	0	0	0	0	1	0	1	0	0	1	1	7	7	0	8
ENSMUSG00000035852	1	1	0	1	1	0	1	0	-1	0	0	0	0	1	1	8	7	1	7
ENSMUSG00000114761	1	1	0	1	0	1	0	0	0	1	0	0	0	1	1	7	7	0	8
ENSMUSG00000001750	1	1	1	1	0	0	1	0	-1	0	0	0	0	1	1	8	7	1	7
ENSMUSG00000027368	1	1	1	1	0	1	0	0	1	1	0	0	0	0	0	7	7	0	8
ENSMUSG00000021423	1	1	0	1	0	0	0	0	1	1	0	0	0	1	1	7	7	0	8
ENSMUSG00000046062	1	0	0	1	1	1	0	0	-1	0	1	0	-1	1	1	9	7	2	6
ENSMUSG00000056708	1	0	1	1	1	1	1	0	-1	0	-1	0	-1	0	1	10	7	3	5
ENSMUSG00000058427	1	1	0	1	1	0	1	0	1	0	0	0	0	0	1	7	7	0	8
ENSMUSG00000030142	1	1	1	1	0	1	0	0	0	0	-1	0	0	1	1	8	7	1	7
ENSMUSG00000026031	1	0	0	1	0	1	0	1	1	0	0	0	0	1	1	7	7	0	8
ENSMUSG00000024778	1	0	0	1	1	1	0	0	-1	1	1	0	0	0	1	8	7	1	7
ENSMUSG00000022035	1	0	0	1	0	0	0	0	1	1	1	0	0	1	1	7	7	0	8
ENSMUSG00000042772	1	0	0	1	0	0	1	0	-1	0	1	1	0	1	1	8	7	1	7
ENSMUSG00000025743	1	1	0	1	0	0	0	0	1	1	0	0	0	1	1	7	7	0	8
ENSMUSG00000028599	1	1	1	1	1	0	0	0	1	0	-1	0	0	0	1	8	7	1	7
ENSMUSG00000028333	1	0	0	1	1	1	0	0	1	1	1	0	0	0	0	7	7	0	8
ENSMUSG00000052749	1	1	0	1	0	1	0	0	0	1	0	0	0	1	1	7	7	0	8
ENSMUSG00000010067	0	0	0	1	1	0	1	0	1	0	1	1	-1	0	1	8	7	1	7
ENSMUSG00000112148	1	1	0	1	0	1	0	0	1	1	0	0	0	0	1	7	7	0	8
ENSMUSG00000112324	1	1	0	1	0	0	0	0	1	1	1	0	0	0	1	7	7	0	8
ENSMUSG00000029994	0	0	0	1	0	0	0	1	1	1	1	0	0	1	1	7	7	0	8
ENSMUSG00000052681	1	0	0	1	1	1	0	0	1	0	0	0	0	1	1	7	7	0	8
ENSMUSG00000090942	1	1	1	1	0	0	0	0	0	1	0	0	0	1	1	7	7	0	8
ENSMUSG00000039735	-1	0	0	0	1	1	0	1	1	1	0	0	0	1	1	8	7	1	7
ENSMUSG00000054823	1	0	0	1	0	0	0	0	-1	1	1	1	0	1	1	8	7	1	7
ENSMUSG00000028885	1	1	0	0	0	1	0	0	0	1	1	0	0	1	1	7	7	0	8
ENSMUSG00000023206	1	1	0	1	0	1	0	0	0	0	1	0	0	1	1	7	7	0	8
ENSMUSG00000030275	1	0	0	1	-1	1	0	1	1	0	-1	0	0	1	1	9	7	2	6
ENSMUSG00000091373	1	1	0	1	0	0	1	0	1	0	0	0	0	1	1	7	7	0	8
ENSMUSG00000041926	1	0	0	1	0	0	0	0	1	1	1	0	0	1	1	7	7	0	8
ENSMUSG00000023087	1	0	0	1	1	0	1	0	-1	0	1	1	0	1	0	8	7	1	7
ENSMUSG00000037202	1	1	1	1	0	0	1	0	0	1	1	0	0	0	0	7	7	0	8
ENSMUSG00000028163	1	0	0	1	1	1	0	0	1	0	0	0	0	1	1	7	7	0	8
ENSMUSG00000018774	1	0	1	1	1	0	0	0	1	1	1	0	0	0	0	7	7	0	8
ENSMUSG00000068015	1	0	0	1	0	0	0	0	0	1	1	1	0	1	1	7	7	0	8
ENSMUSG00000045827	1	0	0	1	1	0	1	0	1	0	-1	1	0	0	1	8	7	1	7
ENSMUSG00000026112	1	0	0	1	0	1	0	0	1	1	0	0	0	1	1	7	7	0	8
ENSMUSG00000025877	1	1	1	1	0	-1	0	0	0	1	-1	0	0	1	1	9	7	2	6
ENSMUSG00000024164	1	0	1	1	0	0	0	0	1	1	0	0	0	1	1	7	7	0	8
ENSMUSG00000024235	1	0	0	1	1	0	0	1	1	0	0	0	0	1	1	7	7	0	8
ENSMUSG00000037860	1	0	1	1	0	1	0	0	0	0	1	0	0	1	1	7	7	0	8
ENSMUSG00000044468	0	0	0	1	1	1	0	0	-1	1	1	0	0	1	1	8	7	1	7
ENSMUSG00000054435	1	0	1	1	1	0	0	0	1	1	1	0	0	0	0	7	7	0	8
ENSMUSG00000026395	1	0	1	1	0	0	0	0	1	0	1	0	0	1	1	7	7	0	8
ENSMUSG00000020437	1	0	1	1	0	-1	0	0	1	1	1	0	0	0	1	8	7	1	7
ENSMUSG00000018819	1	0	1	1	0	-1	0	0	1	1	1	0	0	0	1	8	7	1	7
ENSMUSG00000037242	1	0	0	1	1	0	1	0	1	1	0	0	-1	1	0	8	7	1	7
ENSMUSG00000030560	1	0	1	1	0	0	0	0	1	1	0	0	0	1	1	7	7	0	8
ENSMUSG00000057554	1	0	0	1	0	1	0	0	1	0	0	0	1	1	1	7	7	0	8
ENSMUSG00000058927	1	0	0	1	1	1	1	0	0	0	-1	0	0	1	1	8	7	1	7
ENSMUSG00000019866	1	1	0	1	0	0	1	0	-1	0	1	0	0	1	1	8	7	1	7
ENSMUSG00000027398	1	1	1	1	0	0	1	0	1	0	0	0	0	-1	1	8	7	1	7
ENSMUSG00000055541	1	1	1	1	0	0	0	0	0	0	1	0	0	1	1	7	7	0	8
ENSMUSG00000026158	1	0	0	1	0	0	0	0	1	1	1	0	0	1	1	7	7	0	8
ENSMUSG00000026628	1	1	1	1	1	0	0	0	-1	0	0	1	0	1	0	8	7	1	7
ENSMUSG00000110631	1	1	0	1	0	0	0	0	1	1	1	0	0	0	1	7	7	0	8
ENSMUSG00000026875	0	0	1	1	-1	1	-1	0	1	0	-1	1	0	1	1	10	7	3	5
ENSMUSG00000035273	1	1	0	1	0	0	0	0	1	1	1	0	0	1	0	7	7	0	8
ENSMUSG00000020415	1	1	0	1	-1	1	0	1	-1	0	0	-1	0	1	1	10	7	3	5
ENSMUSG00000047810	1	0	1	1	0	0	0	0	1	0	1	0	0	1	1	7	7	0	8
ENSMUSG00000035493	1	1	0	1	0	1	0	0	1	1	0	0	-1	0	1	8	7	1	7
ENSMUSG00000103105	1	1	0	1	0	0	0	1	0	1	0	0	0	1	1	7	7	0	8
ENSMUSG00000052485	1	0	0	1	1	0	1	0	0	1	0	0	0	1	1	7	7	0	8
ENSMUSG00000073902	1	1	1	1	0	0	0	0	0	0	1	0	0	1	1	7	7	0	8
ENSMUSG00000001281	1	0	1	1	0	0	0	0	1	1	1	0	0	0	1	7	7	0	8
ENSMUSG00000023132	1	1	1	1	0	0	1	0	0	1	1	0	0	0	0	7	7	0	8
ENSMUSG00000015950	1	0	0	1	0	-1	0	0	1	1	1	0	0	1	1	8	7	1	7
ENSMUSG00000097680	1	0	0	1	0	0	1	0	1	0	1	0	0	1	1	7	7	0	8
ENSMUSG00000030157	1	0	1	1	0	1	0	0	-1	0	1	0	-1	1	1	9	7	2	6
ENSMUSG00000060183	1	1	0	1	0	1	0	1	0	0	0	0	0	1	1	7	7	0	8
ENSMUSG00000042350	1	0	0	1	-1	0	0	0	1	1	1	0	0	1	1	8	7	1	7
ENSMUSG00000092368	1	1	0	1	1	0	0	0	0	0	0	1	0	1	1	7	7	0	8
ENSMUSG00000025408	1	0	0	1	1	1	1	0	0	0	0	1	-1	0	1	8	7	1	7
ENSMUSG00000078771	1	1	1	1	0	0	0	0	0	1	0	0	0	1	1	7	7	0	8
ENSMUSG00000026669	1	0	0	1	1	0	0	0	1	1	1	0	0	1	0	7	7	0	8
ENSMUSG00000023905	1	0	1	1	1	1	1	0	1	0	0	0	0	0	0	7	7	0	8
ENSMUSG00000044768	1	0	0	1	0	1	0	1	-1	-1	-1	0	1	1	1	10	7	3	5
ENSMUSG00000050549	1	1	0	1	0	1	0	1	-1	0	0	0	0	1	1	8	7	1	7
ENSMUSG00000035352	1	1	1	1	0	1	0	0	0	0	0	0	0	1	1	7	7	0	8
ENSMUSG00000027660	0	0	0	1	1	0	0	0	1	1	0	1	-1	1	1	8	7	1	7
ENSMUSG00000009687	1	0	1	1	0	0	1	0	1	1	-1	0	0	0	1	8	7	1	7
ENSMUSG00000023961	1	1	0	1	0	1	1	0	-1	-1	-1	0	0	1	1	10	7	3	5
ENSMUSG00000024397	1	1	1	1	0	0	0	0	0	1	0	0	0	1	1	7	7	0	8
ENSMUSG00000091542	1	0	0	0	0	1	1	1	1	0	0	0	0	1	1	7	7	0	8
ENSMUSG00000043939	1	1	0	1	0	1	0	1	0	0	0	0	0	1	1	7	7	0	8
ENSMUSG00000031652	1	0	0	1	1	1	1	0	-1	0	0	0	0	1	1	8	7	1	7
ENSMUSG00000032359	1	0	1	1	1	0	0	0	1	1	0	0	0	0	1	7	7	0	8
ENSMUSG00000050029	1	0	0	1	1	1	0	0	1	0	0	0	0	1	1	7	7	0	8
ENSMUSG00000027641	1	1	0	1	0	0	0	0	0	1	1	0	0	1	1	7	7	0	8
ENSMUSG00000047098	1	1	0	1	0	0	1	0	0	1	0	0	0	1	1	7	7	0	8
ENSMUSG00000104985	1	1	0	1	0	1	1	0	-1	0	0	0	0	1	1	8	7	1	7
ENSMUSG00000073643	0	0	0	1	0	0	1	0	-1	1	1	1	0	1	1	8	7	1	7
ENSMUSG00000055204	1	0	0	1	0	0	0	0	1	0	1	1	0	1	1	7	7	0	8
ENSMUSG00000047407	1	0	0	1	1	1	0	0	-1	1	-1	1	0	0	1	9	7	2	6
ENSMUSG00000040528	1	1	0	1	0	0	0	0	1	1	0	0	0	1	1	7	7	0	8
ENSMUSG00000040747	1	0	1	1	0	0	1	0	1	1	-1	0	0	0	1	8	7	1	7
ENSMUSG00000105703	1	0	0	1	1	1	0	0	1	0	1	0	0	0	1	7	7	0	8
ENSMUSG00000027433	1	0	0	1	0	0	0	0	1	0	1	1	0	1	1	7	7	0	8
ENSMUSG00000099241	1	1	0	1	0	1	0	1	0	0	0	0	0	1	1	7	7	0	8
ENSMUSG00000021591	1	0	0	1	-1	0	0	0	1	1	1	0	0	1	1	8	7	1	7
ENSMUSG00000025044	1	1	1	1	0	1	0	0	0	0	0	0	0	1	1	7	7	0	8
ENSMUSG00000011114	1	0	0	1	1	0	1	0	0	0	1	0	0	1	1	7	7	0	8
ENSMUSG00000096979	1	0	0	1	1	1	0	0	1	0	1	0	0	0	1	7	7	0	8
ENSMUSG00000026003	1	0	0	1	-1	0	1	1	1	1	1	0	0	0	0	8	7	1	7
ENSMUSG00000079523	1	1	0	1	1	0	0	0	-1	1	-1	0	0	1	1	9	7	2	6
ENSMUSG00000030199	1	0	0	1	0	0	0	0	1	1	1	0	0	1	1	7	7	0	8
ENSMUSG00000027959	1	0	0	1	0	1	0	1	-1	0	1	0	0	1	1	8	7	1	7
ENSMUSG00000031712	1	0	0	1	0	1	0	1	0	0	1	0	0	1	1	7	7	0	8
ENSMUSG00000026029	1	0	1	1	0	0	0	0	1	1	0	0	0	1	1	7	7	0	8
ENSMUSG00000049969	1	0	0	1	0	1	0	0	1	0	-1	1	0	1	1	8	7	1	7
ENSMUSG00000095366	1	1	1	1	0	0	0	1	0	0	0	0	0	1	1	7	7	0	8
ENSMUSG00000054717	1	0	1	1	1	0	0	0	1	1	1	0	0	0	0	7	7	0	8
ENSMUSG00000060441	1	1	0	1	0	0	1	0	1	0	0	0	0	1	1	7	7	0	8
ENSMUSG00000093327	1	0	1	1	0	0	0	0	1	1	1	0	0	0	1	7	7	0	8
ENSMUSG00000097125	1	1	0	1	0	1	0	0	1	0	-1	0	0	1	1	8	7	1	7
ENSMUSG00000020280	0	0	0	1	0	0	0	0	1	1	1	1	0	1	1	7	7	0	8
ENSMUSG00000025888	1	1	0	1	0	0	0	0	0	1	1	0	0	1	1	7	7	0	8
ENSMUSG00000028874	1	0	1	1	0	0	0	0	1	1	1	0	0	0	1	7	7	0	8
ENSMUSG00000016559	1	0	0	1	1	0	0	0	-1	1	0	1	-1	1	1	9	7	2	6
ENSMUSG00000070354	1	0	1	1	0	0	0	0	0	1	1	0	0	1	1	7	7	0	8
ENSMUSG00000038179	1	1	1	1	0	0	0	0	0	0	1	0	0	1	1	7	7	0	8
ENSMUSG00000036249	1	1	0	1	0	0	1	0	-1	0	0	1	0	1	1	8	7	1	7
ENSMUSG00000000628	1	0	0	1	1	1	1	0	1	1	0	0	0	0	0	7	7	0	8
ENSMUSG00000096850	1	1	1	1	0	0	0	1	0	0	0	0	0	1	1	7	7	0	8
ENSMUSG00000029322	1	1	1	1	0	0	0	-1	-1	1	1	0	0	1	0	9	7	2	6
ENSMUSG00000034484	1	0	0	1	0	0	0	1	1	1	0	0	0	1	1	7	7	0	8
ENSMUSG00000020057	0	0	1	1	0	1	0	0	1	1	0	0	0	1	1	7	7	0	8
ENSMUSG00000056692	1	0	0	1	0	1	0	0	1	1	0	0	0	1	1	7	7	0	8
ENSMUSG00000025324	1	1	0	1	0	0	0	0	-1	1	1	0	0	1	1	8	7	1	7
ENSMUSG00000002602	1	0	0	1	0	0	1	1	1	0	0	0	0	1	1	7	7	0	8
ENSMUSG00000027219	1	1	1	1	0	0	0	0	1	0	0	0	0	1	1	7	7	0	8
ENSMUSG00000036381	1	1	0	1	0	1	0	0	0	1	0	0	0	1	1	7	7	0	8
ENSMUSG00000059498	1	0	1	1	0	0	1	0	1	1	1	0	0	0	-1	8	7	1	7
ENSMUSG00000112478	1	1	0	1	0	0	0	0	1	1	1	-1	0	0	1	8	7	1	7
ENSMUSG00000038058	1	0	0	1	0	1	0	0	1	0	1	0	0	1	1	7	7	0	8
ENSMUSG00000038059	1	0	0	1	1	1	0	0	1	1	1	0	0	0	0	7	7	0	8
ENSMUSG00000024019	1	0	0	1	0	0	1	0	1	1	0	0	0	1	1	7	7	0	8
ENSMUSG00000064289	1	0	0	1	0	1	0	0	1	0	1	0	0	1	1	7	7	0	8
ENSMUSG00000111118	1	1	0	1	0	1	0	0	0	1	0	0	0	1	1	7	7	0	8
ENSMUSG00000034118	1	0	0	1	0	1	0	1	-1	1	0	0	0	1	1	8	7	1	7
ENSMUSG00000039899	1	1	1	1	0	0	0	0	0	1	0	0	0	1	1	7	7	0	8
ENSMUSG00000026657	0	0	0	1	1	0	0	1	-1	1	1	0	0	1	1	8	7	1	7
ENSMUSG00000071068	1	1	1	1	0	0	0	1	0	0	-1	0	0	1	1	8	7	1	7
ENSMUSG00000050370	1	1	1	1	0	1	0	0	0	0	0	0	0	1	1	7	7	0	8
ENSMUSG00000022146	1	1	0	1	1	0	1	0	1	0	0	1	0	0	0	7	7	0	8
ENSMUSG00000022148	1	0	1	1	0	0	0	0	1	1	1	0	0	0	1	7	7	0	8
ENSMUSG00000024696	1	0	1	1	0	0	0	0	0	1	1	0	0	1	1	7	7	0	8
ENSMUSG00000010095	1	0	0	1	1	1	0	0	-1	1	-1	1	0	0	1	9	7	2	6
ENSMUSG00000006818	1	1	0	1	1	1	0	0	-1	0	-1	0	0	1	1	9	7	2	6
ENSMUSG00000031304	1	1	1	1	0	1	0	0	0	0	-1	0	0	1	1	8	7	1	7
ENSMUSG00000026341	1	0	0	1	1	1	0	0	1	0	0	0	0	1	1	7	7	0	8
ENSMUSG00000022126	1	1	1	1	0	1	0	0	0	0	0	0	0	1	1	7	7	0	8
ENSMUSG00000025612	1	0	0	1	0	0	0	1	1	0	0	1	0	1	1	7	7	0	8
ENSMUSG00000002668	1	0	0	1	1	0	0	0	1	0	1	0	0	1	1	7	7	0	8
ENSMUSG00000096802	1	1	0	1	0	0	0	1	0	1	1	0	0	0	1	7	7	0	8
ENSMUSG00000071637	1	1	0	1	1	1	1	0	1	0	0	0	-1	0	0	8	7	1	7
ENSMUSG00000074578	1	0	0	1	1	1	0	0	1	0	0	0	0	1	1	7	7	0	8
ENSMUSG00000032000	1	0	0	1	0	0	1	0	1	1	0	1	0	0	1	7	7	0	8
ENSMUSG00000059436	1	0	0	1	1	1	0	0	1	0	-1	0	0	1	1	8	7	1	7
ENSMUSG00000070544	0	0	0	1	1	1	1	0	1	0	1	1	0	0	0	7	7	0	8
ENSMUSG00000001627	1	0	0	1	1	0	1	0	1	0	1	0	0	0	1	7	7	0	8
ENSMUSG00000080977	1	0	0	1	1	1	1	0	0	0	-1	0	0	1	1	8	7	1	7
ENSMUSG00000059089	1	1	1	1	0	0	0	0	0	1	0	0	0	1	1	7	7	0	8
ENSMUSG00000029380	1	1	0	1	1	-1	1	0	1	0	0	1	0	0	0	8	7	1	7
ENSMUSG00000110386	1	0	0	1	1	1	0	0	1	0	1	0	0	0	1	7	7	0	8
ENSMUSG00000031628	1	0	0	1	1	0	0	0	1	1	1	0	0	0	1	7	7	0	8
ENSMUSG00000045322	1	1	1	1	0	0	0	0	0	1	0	0	0	1	1	7	7	0	8
ENSMUSG00000113175	1	0	0	1	1	1	1	0	1	0	0	0	0	0	1	7	7	0	8
ENSMUSG00000031813	1	1	0	1	-1	0	0	0	1	1	0	0	0	1	1	8	7	1	7
ENSMUSG00000020464	1	1	0	1	1	1	0	0	-1	0	0	0	0	1	1	8	7	1	7
ENSMUSG00000034266	1	0	1	1	1	0	0	0	0	1	1	0	0	0	1	7	7	0	8
ENSMUSG00000028678	1	0	1	1	0	0	0	0	1	1	1	1	0	0	-1	8	7	1	7
ENSMUSG00000112766	1	1	0	1	0	1	0	0	0	1	0	0	0	1	1	7	7	0	8
ENSMUSG00000035373	1	1	1	1	0	0	0	0	0	0	0	1	0	1	1	7	7	0	8
ENSMUSG00000031609	1	1	0	1	0	1	0	1	-1	0	0	0	0	1	1	8	7	1	7
ENSMUSG00000022504	1	1	1	1	0	0	0	0	1	1	0	0	0	0	1	7	7	0	8
ENSMUSG00000058715	1	1	1	1	0	0	1	0	1	0	-1	0	0	0	1	8	7	1	7
ENSMUSG00000031662	1	0	1	1	0	1	0	0	1	0	1	0	0	0	1	7	7	0	8
ENSMUSG00000022564	1	1	0	1	0	0	0	0	1	1	-1	0	0	1	1	8	7	1	7
ENSMUSG00000068606	1	1	1	1	0	0	0	0	0	1	0	0	0	1	1	7	7	0	8
ENSMUSG00000036461	1	0	0	1	1	0	0	0	-1	1	0	1	0	1	1	8	7	1	7
ENSMUSG00000036887	1	1	1	1	0	0	0	0	1	0	0	0	0	1	1	7	7	0	8
ENSMUSG00000052160	1	0	1	1	1	0	0	0	1	1	0	0	0	0	1	7	7	0	8
ENSMUSG00000062038	1	0	0	1	1	1	1	0	0	0	-1	0	0	1	1	8	7	1	7
ENSMUSG00000057789	1	0	1	1	0	0	0	0	0	1	1	-1	0	1	1	8	7	1	7
ENSMUSG00000089844	1	0	0	1	0	1	0	1	-1	1	0	0	0	1	1	8	7	1	7
ENSMUSG00000074622	1	0	0	1	1	1	1	0	1	0	0	0	0	0	1	7	7	0	8
ENSMUSG00000028965	1	1	0	1	1	0	1	0	1	1	-1	0	0	0	0	8	7	1	7
ENSMUSG00000027469	1	0	1	1	0	0	0	0	1	1	1	0	0	0	1	7	7	0	8
ENSMUSG00000082319	1	0	0	1	1	1	0	0	1	0	0	0	0	1	1	7	7	0	8
ENSMUSG00000025076	1	0	1	1	0	0	0	0	1	0	1	0	0	1	1	7	7	0	8
ENSMUSG00000013846	1	0	0	1	1	1	1	0	1	-1	1	0	0	-1	0	9	7	2	6
ENSMUSG00000040829	1	0	0	1	1	1	0	0	1	0	0	0	0	1	1	7	7	0	8
ENSMUSG00000042677	1	1	0	1	1	0	1	0	-1	0	1	0	0	0	1	8	7	1	7
ENSMUSG00000031805	1	0	0	1	0	0	0	0	1	1	1	0	0	0	1	6	6	0	9
ENSMUSG00000021583	1	0	0	1	0	0	0	0	1	0	0	0	1	1	1	6	6	0	9
ENSMUSG00000071713	1	0	1	1	0	0	0	0	1	1	0	0	0	0	1	6	6	0	9
ENSMUSG00000071714	1	0	1	1	0	0	0	0	1	1	0	0	0	0	1	6	6	0	9
ENSMUSG00000073403	1	1	0	0	1	0	1	0	0	0	0	-1	0	1	1	7	6	1	8
ENSMUSG00000031939	0	0	0	1	1	1	0	0	1	1	1	0	0	0	0	6	6	0	9
ENSMUSG00000050592	1	0	1	1	0	0	0	0	1	1	1	0	0	-1	0	7	6	1	8
ENSMUSG00000020694	1	0	0	1	0	0	0	0	1	0	1	0	0	1	1	6	6	0	9
ENSMUSG00000025058	1	1	0	1	0	1	0	0	0	0	0	0	0	1	1	6	6	0	9
ENSMUSG00000002204	0	0	0	1	0	0	-1	0	1	1	1	0	0	1	1	7	6	1	8
ENSMUSG00000027613	1	0	0	1	1	1	1	0	-1	0	0	0	0	1	0	7	6	1	8
ENSMUSG00000052270	1	1	0	1	0	1	0	0	0	0	0	0	0	1	1	6	6	0	9
ENSMUSG00000002699	1	0	1	1	0	0	0	0	1	0	-1	0	0	1	1	7	6	1	8
ENSMUSG00000021670	0	0	0	0	1	0	1	0	1	1	1	1	0	0	0	6	6	0	9
ENSMUSG00000024085	1	0	0	1	0	1	0	0	1	1	1	0	0	0	0	6	6	0	9
ENSMUSG00000019794	1	0	0	1	1	0	0	0	0	0	1	0	0	1	1	6	6	0	9
ENSMUSG00000026773	1	1	0	1	0	0	0	0	1	0	0	0	0	1	1	6	6	0	9
ENSMUSG00000066152	1	0	0	1	0	1	0	0	1	0	-1	0	0	1	1	7	6	1	8
ENSMUSG00000031004	1	0	1	1	0	0	0	0	1	1	1	0	0	0	-1	7	6	1	8
ENSMUSG00000027360	1	0	0	1	0	1	0	0	-1	1	0	0	0	1	1	7	6	1	8
ENSMUSG00000027366	1	1	0	1	0	0	0	0	1	0	0	0	0	1	1	6	6	0	9
ENSMUSG00000058624	1	0	0	1	0	0	1	0	1	1	0	0	0	0	1	6	6	0	9
ENSMUSG00000030187	1	1	1	1	0	0	0	0	0	0	0	0	0	1	1	6	6	0	9
ENSMUSG00000020715	0	0	0	1	0	0	0	0	1	1	1	1	0	-1	1	7	6	1	8
ENSMUSG00000002881	0	0	0	1	1	0	1	0	0	0	1	0	0	1	1	6	6	0	9
ENSMUSG00000038518	0	0	0	1	0	0	0	0	1	1	1	0	0	1	1	6	6	0	9
ENSMUSG00000060477	1	0	0	1	1	0	0	0	-1	1	-1	0	0	1	1	8	6	2	7
ENSMUSG00000027009	1	0	0	1	0	1	0	0	0	-1	1	0	0	1	1	7	6	1	8
ENSMUSG00000024754	0	0	0	1	1	0	0	0	1	1	1	0	0	1	-1	7	6	1	8
ENSMUSG00000042572	1	0	0	1	1	0	0	0	1	0	1	0	0	1	0	6	6	0	9
ENSMUSG00000024965	1	0	1	1	0	-1	1	0	0	0	1	0	0	0	1	7	6	1	8
ENSMUSG00000037649	1	0	1	1	0	0	0	0	1	1	0	0	0	0	1	6	6	0	9
ENSMUSG00000040552	1	0	1	1	0	0	0	0	0	1	0	0	0	1	1	6	6	0	9
ENSMUSG00000073631	1	1	0	1	0	0	0	1	0	0	0	0	0	1	1	6	6	0	9
ENSMUSG00000098650	1	0	0	1	0	1	0	0	1	0	-1	0	0	1	1	7	6	1	8
ENSMUSG00000095687	1	0	1	1	0	0	0	0	1	1	-1	0	0	0	1	7	6	1	8
ENSMUSG00000042029	1	0	0	1	0	0	0	0	1	1	1	0	0	0	1	6	6	0	9
ENSMUSG00000018008	1	0	1	1	1	0	0	0	1	0	1	0	0	0	0	6	6	0	9
ENSMUSG00000060538	1	0	0	1	0	0	0	1	1	0	0	0	0	1	1	6	6	0	9
ENSMUSG00000032300	1	0	0	1	1	0	0	0	-1	1	1	1	0	-1	0	8	6	2	7
ENSMUSG00000040943	0	0	0	1	0	1	0	0	1	1	1	0	0	0	1	6	6	0	9
ENSMUSG00000066278	1	0	0	1	1	0	0	0	-1	1	0	1	0	0	1	7	6	1	8
ENSMUSG00000000838	1	0	0	1	1	1	0	0	-1	0	1	0	0	1	0	7	6	1	8
ENSMUSG00000105987	1	0	1	1	1	1	0	0	1	0	-1	0	0	0	-1	8	6	2	7
ENSMUSG00000015733	1	0	0	1	0	0	0	0	1	1	0	0	0	1	1	6	6	0	9
ENSMUSG00000016528	1	0	0	1	0	0	0	0	1	1	0	0	0	1	1	6	6	0	9
ENSMUSG00000036390	0	0	0	1	1	1	1	0	1	0	0	1	0	-1	0	7	6	1	8
ENSMUSG00000048327	1	0	0	1	0	1	0	0	1	1	1	0	0	0	-1	7	6	1	8
ENSMUSG00000040204	1	0	1	1	0	0	0	0	1	1	1	-1	0	0	-1	8	6	2	7
ENSMUSG00000005125	1	0	0	1	1	0	0	1	1	1	-1	0	0	-1	-1	9	6	3	6
ENSMUSG00000003382	1	0	0	1	1	0	0	0	1	1	-1	0	-1	0	1	8	6	2	7
ENSMUSG00000072844	1	1	0	1	0	0	0	1	0	0	0	0	0	1	1	6	6	0	9
ENSMUSG00000079227	1	1	1	1	0	0	0	0	0	0	-1	0	0	1	1	7	6	1	8
ENSMUSG00000022973	1	0	0	1	0	0	0	0	-1	0	1	1	0	1	1	7	6	1	8
ENSMUSG00000094724	1	0	1	1	0	0	0	0	1	1	-1	0	0	0	1	7	6	1	8
ENSMUSG00000020128	1	0	0	1	0	0	0	0	0	1	1	0	0	1	1	6	6	0	9
ENSMUSG00000020120	1	0	1	1	0	0	0	0	1	1	1	0	0	0	0	6	6	0	9
ENSMUSG00000032218	1	0	1	1	0	0	0	0	1	1	1	0	0	0	-1	7	6	1	8
ENSMUSG00000040264	1	1	0	1	0	1	0	0	0	0	0	0	0	1	1	6	6	0	9
ENSMUSG00000033031	1	0	0	1	0	0	0	0	1	1	1	1	0	0	-1	7	6	1	8
ENSMUSG00000086320	1	0	0	1	1	0	1	0	1	0	0	0	0	0	1	6	6	0	9
ENSMUSG00000028128	1	1	0	1	1	0	1	0	-1	0	0	1	-1	0	-1	9	6	3	6
ENSMUSG00000107215	1	1	0	1	0	0	0	0	0	0	0	0	1	1	1	6	6	0	9
ENSMUSG00000025521	1	0	0	1	0	-1	0	0	1	1	0	0	0	1	1	7	6	1	8
ENSMUSG00000029313	1	0	0	1	-1	0	0	0	1	0	0	1	0	1	1	7	6	1	8
ENSMUSG00000053318	1	1	1	1	0	0	0	0	0	0	0	0	0	1	1	6	6	0	9
ENSMUSG00000022895	1	0	0	1	1	0	1	0	1	0	-1	1	0	0	0	7	6	1	8
ENSMUSG00000073980	1	0	0	1	1	0	1	0	0	0	0	-1	0	1	1	7	6	1	8
ENSMUSG00000031504	1	1	0	1	1	0	0	0	1	0	0	0	0	0	1	6	6	0	9
ENSMUSG00000050490	1	0	0	1	1	1	0	0	-1	0	0	0	0	1	1	7	6	1	8
ENSMUSG00000017002	1	0	0	1	1	0	0	0	1	1	1	0	0	0	0	6	6	0	9
ENSMUSG00000017009	1	0	0	1	1	1	0	0	1	-1	-1	0	-1	1	0	9	6	3	6
ENSMUSG00000074342	1	1	1	1	0	0	0	0	0	0	0	0	0	1	1	6	6	0	9
ENSMUSG00000068749	1	0	0	1	1	1	0	0	-1	0	0	0	0	1	1	7	6	1	8
ENSMUSG00000037544	1	0	0	1	1	0	0	0	1	1	1	0	0	0	-1	7	6	1	8
ENSMUSG00000027881	1	0	0	1	0	0	0	0	1	0	1	1	0	0	1	6	6	0	9
ENSMUSG00000041920	0	0	0	1	1	0	0	0	1	1	1	1	0	-1	0	7	6	1	8
ENSMUSG00000029156	1	0	0	0	0	0	0	1	-1	1	1	0	0	1	1	7	6	1	8
ENSMUSG00000026358	1	1	1	0	0	0	0	0	0	1	1	0	0	0	1	6	6	0	9
ENSMUSG00000038848	0	0	0	1	1	1	0	0	1	0	0	0	0	1	1	6	6	0	9
ENSMUSG00000110866	1	1	0	1	0	0	0	0	1	0	1	-1	0	0	1	7	6	1	8
ENSMUSG00000048832	1	0	0	1	0	0	0	0	1	0	0	1	0	1	1	6	6	0	9
ENSMUSG00000031880	1	0	1	0	1	0	1	0	1	1	0	0	0	0	0	6	6	0	9
ENSMUSG00000055994	1	1	0	1	0	0	0	0	0	1	0	0	0	1	1	6	6	0	9
ENSMUSG00000022684	1	0	0	1	0	0	0	0	1	0	1	0	0	1	1	6	6	0	9
ENSMUSG00000024042	1	0	0	1	0	0	0	0	1	1	0	1	-1	0	1	7	6	1	8
ENSMUSG00000101625	1	0	0	1	1	0	1	0	1	0	0	0	0	0	1	6	6	0	9
ENSMUSG00000021365	-1	0	0	1	1	-1	0	0	1	1	1	1	-1	0	-1	10	6	4	5
ENSMUSG00000042901	1	1	0	1	0	0	0	0	-1	1	0	0	0	1	1	7	6	1	8
ENSMUSG00000042842	0	0	0	1	1	0	1	0	1	1	1	0	0	0	0	6	6	0	9
ENSMUSG00000025790	0	0	0	1	0	0	0	0	1	1	1	0	0	1	1	6	6	0	9
ENSMUSG00000016256	1	0	1	1	0	0	0	0	1	1	-1	0	0	0	1	7	6	1	8
ENSMUSG00000087341	1	0	0	0	1	0	1	0	1	1	1	0	0	0	0	6	6	0	9
ENSMUSG00000037344	1	0	0	1	-1	0	0	0	1	0	1	0	0	1	1	7	6	1	8
ENSMUSG00000020649	1	0	1	1	0	-1	0	0	1	1	1	0	0	0	-1	8	6	2	7
ENSMUSG00000078249	1	1	0	1	0	0	0	0	1	0	-1	0	0	1	1	7	6	1	8
ENSMUSG00000050732	1	0	0	1	1	0	0	0	1	0	0	0	0	1	1	6	6	0	9
ENSMUSG00000026822	1	1	0	1	1	1	0	0	1	0	0	0	0	0	0	6	6	0	9
ENSMUSG00000087107	1	0	1	1	0	0	0	0	0	0	1	0	0	1	1	6	6	0	9
ENSMUSG00000030745	1	0	1	1	0	0	0	0	0	1	0	0	0	1	1	6	6	0	9
ENSMUSG00000036594	1	0	1	1	0	0	0	0	1	1	0	0	0	0	1	6	6	0	9
ENSMUSG00000027164	0	0	0	1	1	1	0	0	1	0	0	1	0	0	1	6	6	0	9
ENSMUSG00000022534	1	1	1	1	0	0	0	0	0	0	0	0	0	1	1	6	6	0	9
ENSMUSG00000038352	1	0	1	1	1	1	0	0	-1	0	0	0	0	0	1	7	6	1	8
ENSMUSG00000028668	1	0	0	1	1	0	0	0	0	0	1	0	0	1	1	6	6	0	9
ENSMUSG00000021939	1	0	0	1	1	0	0	0	1	1	1	0	0	0	0	6	6	0	9
ENSMUSG00000048234	1	0	0	1	0	0	0	0	1	1	0	1	0	0	1	6	6	0	9
ENSMUSG00000051457	1	0	1	1	0	0	0	0	1	0	1	0	0	0	1	6	6	0	9
ENSMUSG00000046688	1	1	0	1	0	1	0	0	0	0	0	0	0	1	1	6	6	0	9
ENSMUSG00000046687	1	0	0	0	0	1	0	1	-1	0	1	0	0	1	1	7	6	1	8
ENSMUSG00000092500	1	0	0	1	1	0	1	0	0	0	0	0	1	0	1	6	6	0	9
ENSMUSG00000027555	1	1	0	1	0	0	0	0	1	0	0	0	0	1	1	6	6	0	9
ENSMUSG00000041431	1	0	1	1	0	0	0	0	1	1	1	0	0	0	-1	7	6	1	8
ENSMUSG00000031827	1	0	1	1	1	0	0	0	1	1	-1	0	0	0	0	7	6	1	8
ENSMUSG00000034708	1	0	0	1	0	0	0	0	1	1	-1	0	0	1	1	7	6	1	8
ENSMUSG00000034707	1	0	0	1	0	0	0	0	-1	1	1	0	0	1	1	7	6	1	8
ENSMUSG00000074677	1	0	1	1	0	0	0	0	1	1	0	0	0	0	1	6	6	0	9
ENSMUSG00000106334	1	1	0	1	0	0	0	0	1	0	1	0	0	0	1	6	6	0	9
ENSMUSG00000032578	0	0	0	1	1	1	1	1	1	0	-1	0	0	0	0	7	6	1	8
ENSMUSG00000092366	1	1	0	0	1	0	1	0	0	0	0	0	0	1	1	6	6	0	9
ENSMUSG00000049625	1	1	1	1	0	-1	0	0	0	1	0	0	0	0	1	7	6	1	8
ENSMUSG00000042167	0	0	0	1	0	1	0	0	1	0	1	0	0	1	1	6	6	0	9
ENSMUSG00000006281	1	0	0	1	-1	-1	0	0	1	1	0	0	0	1	1	8	6	2	7
ENSMUSG00000024335	1	0	0	1	1	0	0	0	-1	0	1	0	0	1	1	7	6	1	8
ENSMUSG00000026664	1	0	0	1	-1	0	0	0	1	1	0	0	0	1	1	7	6	1	8
ENSMUSG00000026087	1	0	0	1	0	1	0	0	1	0	-1	0	0	1	1	7	6	1	8
ENSMUSG00000036896	1	1	1	1	0	0	0	0	1	0	0	0	0	0	1	6	6	0	9
ENSMUSG00000031266	1	0	0	1	0	0	0	0	1	1	0	0	0	1	1	6	6	0	9
ENSMUSG00000031264	1	0	1	1	0	0	0	0	1	1	0	0	0	0	1	6	6	0	9
ENSMUSG00000028954	1	0	0	1	0	0	0	0	1	0	0	1	0	1	1	6	6	0	9
ENSMUSG00000028480	1	0	1	1	0	0	0	0	1	1	0	0	0	1	-1	7	6	1	8
ENSMUSG00000044583	1	1	0	1	0	0	0	0	0	1	0	0	0	1	1	6	6	0	9
ENSMUSG00000020330	1	0	1	1	0	0	0	0	1	1	1	0	0	0	-1	7	6	1	8
ENSMUSG00000052384	1	0	1	1	1	0	0	0	1	0	-1	0	0	1	0	7	6	1	8
ENSMUSG00000021266	1	1	0	1	0	0	0	0	-1	1	0	0	0	1	1	7	6	1	8
ENSMUSG00000022221	1	0	1	1	0	0	0	0	1	1	1	0	0	0	0	6	6	0	9
ENSMUSG00000057137	1	0	0	1	0	0	1	0	-1	1	0	0	0	1	1	7	6	1	8
ENSMUSG00000057135	1	1	0	1	0	0	0	1	0	0	-1	0	0	1	1	7	6	1	8
ENSMUSG00000087206	0	0	1	1	1	1	1	0	1	0	0	0	0	0	0	6	6	0	9
ENSMUSG00000036180	0	0	0	1	1	1	1	0	1	0	0	0	0	1	0	6	6	0	9
ENSMUSG00000021725	1	0	0	1	0	0	0	0	1	0	-1	1	0	1	1	7	6	1	8
ENSMUSG00000024644	1	0	0	1	0	0	0	0	1	1	0	0	0	1	1	6	6	0	9
ENSMUSG00000027669	1	0	0	1	0	0	0	0	1	0	1	0	0	1	1	6	6	0	9
ENSMUSG00000031862	1	0	0	1	0	0	0	0	1	0	1	0	0	1	1	6	6	0	9
ENSMUSG00000038910	1	0	0	1	0	-1	0	0	0	1	1	0	0	1	1	7	6	1	8
ENSMUSG00000044701	1	0	0	1	0	1	0	1	0	0	0	0	0	1	1	6	6	0	9
ENSMUSG00000019942	1	0	1	1	0	0	0	0	1	1	1	0	0	0	-1	7	6	1	8
ENSMUSG00000019947	1	0	0	1	0	1	0	0	1	1	0	1	0	0	0	6	6	0	9
ENSMUSG00000099974	1	0	1	1	0	0	0	0	1	1	1	0	0	0	0	6	6	0	9
ENSMUSG00000025001	1	0	0	1	0	0	0	0	1	1	1	0	1	0	-1	7	6	1	8
ENSMUSG00000048534	1	1	0	1	0	0	0	0	1	1	1	0	0	0	0	6	6	0	9
ENSMUSG00000034906	1	0	1	1	0	0	0	0	1	1	1	0	0	0	-1	7	6	1	8
ENSMUSG00000032688	1	0	0	1	1	1	0	0	1	0	1	0	0	0	0	6	6	0	9
ENSMUSG00000017716	1	0	1	1	0	0	0	0	1	1	1	0	0	0	-1	7	6	1	8
ENSMUSG00000068631	0	0	0	0	1	1	1	1	0	0	0	0	0	1	1	6	6	0	9
ENSMUSG00000000078	1	0	0	1	0	0	0	0	-1	1	-1	1	-1	1	1	9	6	3	6
ENSMUSG00000092224	1	1	0	0	1	0	1	0	0	0	0	-1	0	1	1	7	6	1	8
ENSMUSG00000106173	1	1	0	1	0	0	0	0	0	0	1	0	0	1	1	6	6	0	9
ENSMUSG00000024772	0	0	0	1	1	1	0	0	-1	1	1	0	0	1	0	7	6	1	8
ENSMUSG00000078616	1	1	0	1	0	0	0	0	0	1	0	0	0	1	1	6	6	0	9
ENSMUSG00000034959	1	0	0	1	0	0	0	0	0	1	1	0	0	1	1	6	6	0	9
ENSMUSG00000097354	1	0	0	1	0	1	0	1	-1	0	0	0	0	1	1	7	6	1	8
ENSMUSG00000036362	1	0	0	1	0	0	0	0	0	1	1	0	0	1	1	6	6	0	9
ENSMUSG00000023505	1	0	1	1	0	0	0	0	1	1	1	-1	0	0	-1	8	6	2	7
ENSMUSG00000111737	1	1	1	1	0	0	0	0	0	0	0	0	0	1	1	6	6	0	9
ENSMUSG00000098374	1	0	0	1	0	0	1	0	0	1	0	0	0	1	1	6	6	0	9
ENSMUSG00000042608	1	0	0	1	1	0	1	0	-1	0	0	1	0	0	1	7	6	1	8
ENSMUSG00000068335	1	0	0	1	0	0	0	0	1	1	1	0	-1	0	1	7	6	1	8
ENSMUSG00000028249	1	0	0	1	1	1	0	0	1	0	0	0	0	1	0	6	6	0	9
ENSMUSG00000027293	0	0	0	1	0	0	1	0	1	1	1	0	0	1	0	6	6	0	9
ENSMUSG00000024521	1	0	0	1	0	0	0	0	1	1	1	0	0	0	1	6	6	0	9
ENSMUSG00000030341	1	0	1	1	0	1	0	0	1	0	-1	0	0	1	0	7	6	1	8
ENSMUSG00000073412	1	1	1	1	0	0	0	0	0	0	0	0	0	1	1	6	6	0	9
ENSMUSG00000073418	1	0	1	1	0	0	0	0	1	1	0	0	0	0	1	6	6	0	9
ENSMUSG00000028525	0	0	0	1	1	0	0	0	1	1	0	1	-1	0	1	7	6	1	8
ENSMUSG00000024953	1	1	0	1	0	0	0	0	-1	1	-1	0	0	1	1	8	6	2	7
ENSMUSG00000057367	1	0	0	1	1	0	0	0	0	0	0	1	0	1	1	6	6	0	9
ENSMUSG00000036905	1	1	1	1	0	0	0	0	1	1	0	0	0	0	0	6	6	0	9
ENSMUSG00000028266	1	0	0	1	1	0	0	0	1	0	-1	0	0	1	1	7	6	1	8
ENSMUSG00000079293	1	0	1	1	0	0	1	0	1	1	0	0	0	0	0	6	6	0	9
ENSMUSG00000097415	1	0	1	1	0	0	0	0	1	1	1	0	0	0	0	6	6	0	9
ENSMUSG00000026942	1	0	0	1	1	0	0	0	-1	0	1	1	0	0	1	7	6	1	8
ENSMUSG00000028098	1	0	0	1	0	0	0	0	1	0	1	0	0	1	1	6	6	0	9
ENSMUSG00000021624	1	0	1	1	0	0	0	0	0	1	0	0	0	1	1	6	6	0	9
ENSMUSG00000032841	0	0	1	1	1	0	0	0	1	-1	-1	0	0	1	1	8	6	2	7
ENSMUSG00000001768	1	0	0	1	1	0	0	0	-1	0	0	1	-1	1	1	8	6	2	7
ENSMUSG00000020897	1	0	1	1	0	-1	0	0	1	1	1	0	0	0	-1	8	6	2	7
ENSMUSG00000020893	1	1	0	1	0	-1	0	0	1	1	-1	1	-1	0	0	9	6	3	6
ENSMUSG00000041781	1	0	0	1	1	0	0	0	0	0	1	0	0	1	1	6	6	0	9
ENSMUSG00000023010	1	0	0	1	0	0	0	0	1	1	-1	0	0	1	1	7	6	1	8
ENSMUSG00000106874	1	0	0	1	1	0	0	0	1	1	0	0	0	0	1	6	6	0	9
ENSMUSG00000041571	1	1	0	1	0	0	0	0	0	1	-1	0	0	1	1	7	6	1	8
ENSMUSG00000038608	1	0	0	1	0	0	0	0	1	0	1	0	0	1	1	6	6	0	9
ENSMUSG00000031960	1	0	0	1	1	0	1	0	1	1	0	0	0	0	0	6	6	0	9
ENSMUSG00000029470	1	0	0	1	-1	0	0	0	1	0	-1	1	0	1	1	8	6	2	7
ENSMUSG00000024642	0	0	0	1	0	1	0	0	1	-1	-1	1	0	1	1	8	6	2	7
ENSMUSG00000001166	1	1	0	1	0	0	0	0	1	0	0	0	0	1	1	6	6	0	9
ENSMUSG00000020077	1	0	1	1	0	0	0	0	1	1	0	0	0	0	1	6	6	0	9
ENSMUSG00000099693	1	1	0	1	0	1	0	0	0	0	0	0	0	1	1	6	6	0	9
ENSMUSG00000033777	1	1	1	1	0	0	0	0	0	1	0	0	0	0	1	6	6	0	9
ENSMUSG00000031557	1	0	0	1	0	0	1	0	-1	1	-1	0	0	1	1	8	6	2	7
ENSMUSG00000037474	1	0	1	1	0	0	0	0	0	1	1	1	0	0	-1	7	6	1	8
ENSMUSG00000078671	0	0	0	1	1	1	0	0	-1	0	1	1	0	-1	1	8	6	2	7
ENSMUSG00000029640	1	0	0	1	0	0	0	0	1	0	0	1	0	1	1	6	6	0	9
ENSMUSG00000029649	1	1	0	1	1	0	0	0	0	1	0	0	0	1	0	6	6	0	9
ENSMUSG00000038172	1	0	0	1	0	0	0	0	1	0	1	1	0	1	0	6	6	0	9
ENSMUSG00000089929	1	0	1	1	0	0	0	0	1	1	1	0	0	0	0	6	6	0	9
ENSMUSG00000045502	1	1	0	1	1	0	1	0	-1	0	0	0	0	0	1	7	6	1	8
ENSMUSG00000042228	1	0	1	1	0	0	0	0	-1	1	0	0	0	1	1	7	6	1	8
ENSMUSG00000032410	1	0	0	1	0	0	0	0	0	0	1	1	0	1	1	6	6	0	9
ENSMUSG00000027843	1	0	1	1	0	0	0	0	0	1	1	0	0	-1	1	7	6	1	8
ENSMUSG00000020914	1	0	1	1	0	0	0	0	1	1	1	0	0	0	-1	7	6	1	8
ENSMUSG00000028854	1	0	0	1	0	0	0	0	1	0	0	1	0	1	1	6	6	0	9
ENSMUSG00000029328	0	0	0	1	1	1	0	0	1	0	1	1	0	0	0	6	6	0	9
ENSMUSG00000028581	1	0	1	1	0	0	1	0	1	1	0	0	0	0	0	6	6	0	9
ENSMUSG00000016534	1	0	0	1	0	0	0	1	1	1	0	0	0	0	1	6	6	0	9
ENSMUSG00000038811	1	0	1	1	0	0	0	0	1	1	-1	0	0	0	1	7	6	1	8
ENSMUSG00000086841	1	0	0	0	0	0	0	0	1	1	1	1	-1	0	1	7	6	1	8
ENSMUSG00000039853	1	1	0	1	0	0	1	0	-1	0	0	0	0	1	1	7	6	1	8
ENSMUSG00000079036	1	0	0	1	1	1	0	0	1	0	0	1	0	0	0	6	6	0	9
ENSMUSG00000050335	1	0	1	1	1	0	0	0	-1	1	1	0	-1	0	0	8	6	2	7
ENSMUSG00000063388	1	1	0	1	1	0	1	0	0	0	0	0	0	0	1	6	6	0	9
ENSMUSG00000053158	1	0	1	1	0	0	0	0	0	1	1	0	0	0	1	6	6	0	9
ENSMUSG00000079547	1	0	1	1	0	0	0	0	1	1	0	0	0	0	1	6	6	0	9
ENSMUSG00000096292	1	1	0	1	0	0	0	1	0	1	0	0	0	0	1	6	6	0	9
ENSMUSG00000022965	1	0	0	1	1	0	0	0	1	1	0	0	0	0	1	6	6	0	9
ENSMUSG00000020790	1	0	0	1	0	0	0	0	-1	1	1	0	0	1	1	7	6	1	8
ENSMUSG00000046157	1	0	0	1	0	1	0	0	1	0	-1	0	0	1	1	7	6	1	8
ENSMUSG00000048806	1	0	0	1	1	1	0	0	0	0	0	0	0	1	1	6	6	0	9
ENSMUSG00000024486	0	0	0	1	1	1	1	0	1	0	0	1	-1	0	0	7	6	1	8
ENSMUSG00000033004	1	0	0	1	0	0	0	0	1	0	1	0	0	1	1	6	6	0	9
ENSMUSG00000055491	1	0	0	1	1	1	1	0	1	0	-1	0	0	0	0	7	6	1	8
ENSMUSG00000012428	1	1	0	1	1	0	1	0	1	0	0	0	0	0	0	6	6	0	9
ENSMUSG00000051378	1	0	1	1	0	0	0	0	1	1	1	0	0	0	-1	7	6	1	8
ENSMUSG00000091955	1	1	0	1	1	0	0	0	-1	1	-1	0	0	0	1	8	6	2	7
ENSMUSG00000039264	1	0	1	1	0	0	0	0	1	1	1	0	0	0	0	6	6	0	9
ENSMUSG00000040026	1	1	1	1	0	1	0	0	0	0	0	0	0	0	1	6	6	0	9
ENSMUSG00000021948	1	0	0	1	0	0	0	0	1	0	1	1	0	0	1	6	6	0	9
ENSMUSG00000056476	0	0	0	0	1	1	0	0	-1	1	1	0	0	1	1	7	6	1	8
ENSMUSG00000016495	1	0	0	1	0	0	0	0	1	1	1	0	-1	1	0	7	6	1	8
ENSMUSG00000060586	1	0	1	1	0	0	0	0	1	1	0	0	0	0	1	6	6	0	9
ENSMUSG00000039936	1	0	0	1	1	0	0	0	1	0	-1	0	0	1	1	7	6	1	8
ENSMUSG00000024691	1	0	0	1	0	0	0	0	1	1	0	0	0	1	1	6	6	0	9
ENSMUSG00000041936	1	0	0	0	0	0	1	0	1	1	0	0	0	1	1	6	6	0	9
ENSMUSG00000024424	1	0	0	1	0	0	0	0	-1	1	1	1	0	0	1	7	6	1	8
ENSMUSG00000028692	1	0	0	1	0	0	0	0	1	1	0	0	0	1	1	6	6	0	9
ENSMUSG00000069539	0	0	0	1	0	0	0	0	0	1	1	1	0	1	1	6	6	0	9
ENSMUSG00000041238	0	0	0	1	0	0	0	0	1	1	1	0	0	1	1	6	6	0	9
ENSMUSG00000098399	1	1	0	1	0	0	0	0	0	1	0	0	0	1	1	6	6	0	9
ENSMUSG00000102051	1	0	0	1	1	0	1	0	0	0	1	0	0	0	1	6	6	0	9
ENSMUSG00000021109	1	0	0	1	1	0	0	0	1	1	1	0	0	0	0	6	6	0	9
ENSMUSG00000039910	0	0	0	1	0	1	0	1	1	0	0	1	0	1	0	6	6	0	9
ENSMUSG00000004040	1	0	0	1	0	0	0	0	1	1	0	0	0	1	1	6	6	0	9
ENSMUSG00000060791	1	0	1	1	0	0	0	0	-1	1	1	0	0	0	1	7	6	1	8
ENSMUSG00000021377	1	0	0	1	0	0	0	0	1	0	1	0	0	1	1	6	6	0	9
ENSMUSG00000025283	1	0	0	1	1	0	0	0	1	0	0	-1	0	1	1	7	6	1	8
ENSMUSG00000097572	1	1	0	1	0	0	0	0	1	0	0	0	0	1	1	6	6	0	9
ENSMUSG00000004266	1	0	1	1	0	0	0	0	-1	1	1	0	0	0	1	7	6	1	8
ENSMUSG00000107169	1	0	0	1	0	1	0	0	1	1	-1	0	0	0	1	7	6	1	8
ENSMUSG00000043664	1	1	0	1	0	0	0	0	1	0	0	0	0	1	1	6	6	0	9
ENSMUSG00000021125	1	0	0	1	1	1	1	0	1	0	0	0	0	0	0	6	6	0	9
ENSMUSG00000037443	0	0	0	1	1	1	0	0	1	0	1	0	0	0	1	6	6	0	9
ENSMUSG00000056737	1	0	0	1	0	0	0	0	1	1	1	0	-1	0	1	7	6	1	8
ENSMUSG00000033220	1	0	1	1	0	0	1	0	1	0	0	0	0	0	1	6	6	0	9
ENSMUSG00000028042	1	0	0	1	0	0	0	0	1	1	1	0	0	0	1	6	6	0	9
ENSMUSG00000027540	1	0	0	1	1	1	0	0	1	1	0	0	0	-1	0	7	6	1	8
ENSMUSG00000030149	1	1	1	1	0	0	0	0	0	-1	0	0	0	1	1	7	6	1	8
ENSMUSG00000035248	1	0	0	1	0	0	0	0	1	0	1	0	0	1	1	6	6	0	9
ENSMUSG00000028459	1	1	0	1	0	0	0	0	1	0	-1	0	0	1	1	7	6	1	8
ENSMUSG00000040435	1	0	0	1	1	0	0	0	-1	1	0	1	-1	0	1	8	6	2	7
ENSMUSG00000049657	1	0	0	1	0	1	0	0	0	0	0	1	0	1	1	6	6	0	9
ENSMUSG00000049659	1	0	0	1	1	0	0	0	-1	0	1	0	0	1	1	7	6	1	8
ENSMUSG00000035382	1	0	0	1	0	0	0	0	1	0	1	0	0	1	1	6	6	0	9
ENSMUSG00000021880	1	0	1	1	0	0	0	0	0	1	0	0	0	1	1	6	6	0	9
ENSMUSG00000024613	1	0	0	1	0	0	0	0	0	1	1	0	0	1	1	6	6	0	9
ENSMUSG00000030124	1	0	1	1	0	0	0	0	0	1	1	0	0	0	1	6	6	0	9
ENSMUSG00000044350	1	0	0	1	0	0	0	0	1	0	0	0	1	1	1	6	6	0	9
ENSMUSG00000042349	1	1	0	1	0	0	0	0	-1	0	1	0	0	1	1	7	6	1	8
ENSMUSG00000020134	1	0	0	1	1	1	0	0	-1	0	-1	0	0	1	1	8	6	2	7
ENSMUSG00000031444	1	1	0	1	0	0	0	0	1	1	0	0	0	0	1	6	6	0	9
ENSMUSG00000074476	1	0	1	1	0	0	0	0	1	1	1	0	0	0	-1	7	6	1	8
ENSMUSG00000083178	1	0	0	0	1	1	1	0	0	0	0	0	0	1	1	6	6	0	9
ENSMUSG00000087070	1	0	0	1	1	0	1	0	1	0	0	0	0	0	1	6	6	0	9
ENSMUSG00000032501	1	0	0	1	1	0	1	0	-1	1	1	0	0	0	0	7	6	1	8
ENSMUSG00000091705	1	1	0	1	0	0	0	0	1	0	0	-1	0	1	1	7	6	1	8
ENSMUSG00000037337	1	0	1	1	0	-1	0	0	1	1	1	0	0	0	0	7	6	1	8
ENSMUSG00000028633	1	1	0	1	1	0	1	0	1	0	-1	0	0	0	0	7	6	1	8
ENSMUSG00000093661	1	0	0	1	0	0	0	0	-1	1	1	0	0	1	1	7	6	1	8
ENSMUSG00000000184	1	0	0	1	1	1	0	1	-1	-1	-1	0	0	1	0	9	6	3	6
ENSMUSG00000026425	0	0	0	1	-1	0	0	0	-1	1	1	1	0	1	1	8	6	2	7
ENSMUSG00000056529	1	1	0	1	0	1	0	0	0	1	0	0	0	0	1	6	6	0	9
ENSMUSG00000028792	1	0	0	1	1	0	0	0	1	1	1	0	0	0	0	6	6	0	9
ENSMUSG00000028796	1	0	0	1	0	0	1	0	1	0	-1	0	0	1	1	7	6	1	8
ENSMUSG00000037826	0	0	0	1	0	1	0	1	-1	1	0	0	0	1	1	7	6	1	8
ENSMUSG00000037820	1	0	1	1	1	0	0	0	-1	1	-1	0	0	0	1	8	6	2	7
ENSMUSG00000015437	1	1	1	1	0	0	0	0	0	1	1	0	0	0	0	6	6	0	9
ENSMUSG00000066036	1	0	0	1	0	0	0	0	-1	1	1	0	0	1	1	7	6	1	8
ENSMUSG00000095865	1	0	1	1	0	0	0	0	1	1	1	0	0	0	0	6	6	0	9
ENSMUSG00000028967	1	0	0	1	1	0	1	0	1	1	0	0	-1	0	0	7	6	1	8
ENSMUSG00000002033	1	0	1	1	0	0	0	0	1	1	1	0	0	0	0	6	6	0	9
ENSMUSG00000019979	1	0	0	1	0	0	0	0	1	1	1	0	0	0	1	6	6	0	9
ENSMUSG00000024513	1	0	0	1	0	0	0	0	0	1	1	0	0	1	1	6	6	0	9
ENSMUSG00000056501	1	1	0	1	1	0	0	0	-1	1	0	0	0	0	1	7	6	1	8
ENSMUSG00000022218	1	0	1	1	1	0	0	0	1	0	0	0	0	0	1	6	6	0	9
ENSMUSG00000018167	1	0	0	1	0	1	0	0	1	-1	0	0	0	1	1	7	6	1	8
ENSMUSG00000053063	1	0	1	1	0	0	0	0	1	0	0	0	0	1	1	6	6	0	9
ENSMUSG00000027322	1	1	0	1	0	0	0	0	1	0	0	0	0	1	1	6	6	0	9
ENSMUSG00000041483	1	0	0	1	1	0	0	0	1	0	-1	0	-1	1	1	8	6	2	7
ENSMUSG00000058818	1	0	1	1	0	0	0	0	1	1	0	0	0	0	1	6	6	0	9
ENSMUSG00000089647	1	0	0	1	0	0	0	0	1	1	1	0	0	0	1	6	6	0	9
ENSMUSG00000068129	1	0	1	1	0	0	0	0	0	1	-1	0	0	0	1	6	5	1	9
ENSMUSG00000064128	1	0	0	1	0	0	0	0	-1	0	1	0	0	1	1	6	5	1	9
ENSMUSG00000010392	0	0	0	1	1	0	0	0	1	0	0	1	0	0	1	5	5	0	10
ENSMUSG00000056749	1	0	0	1	1	0	0	0	1	0	-1	1	-1	0	0	7	5	2	8
ENSMUSG00000004446	1	0	0	1	0	0	0	0	1	0	0	0	0	1	1	5	5	0	10
ENSMUSG00000029009	1	0	0	1	-1	0	0	1	-1	0	0	0	-1	1	1	8	5	3	7
ENSMUSG00000029915	1	1	1	1	0	1	0	0	0	0	0	0	0	0	0	5	5	0	10
ENSMUSG00000021614	1	1	0	1	0	0	0	0	0	1	0	0	0	1	-1	6	5	1	9
ENSMUSG00000032301	1	0	0	1	0	0	0	0	1	1	0	0	0	1	0	5	5	0	10
ENSMUSG00000021809	1	0	0	0	0	1	0	0	1	0	0	0	0	1	1	5	5	0	10
ENSMUSG00000049037	1	1	0	1	0	0	0	0	0	0	0	0	0	1	1	5	5	0	10
ENSMUSG00000053007	1	0	0	0	1	1	0	0	0	0	0	0	0	1	1	5	5	0	10
ENSMUSG00000055401	1	0	0	1	-1	0	0	0	1	0	0	0	0	1	1	6	5	1	9
ENSMUSG00000090523	1	0	0	1	0	0	0	0	1	1	1	0	0	0	0	5	5	0	10
ENSMUSG00000006782	1	0	0	1	0	0	0	0	-1	1	0	0	0	1	1	6	5	1	9
ENSMUSG00000040774	1	0	0	1	-1	0	0	0	1	0	-1	0	0	1	1	7	5	2	8
ENSMUSG00000029617	0	0	0	1	0	0	0	0	1	0	1	0	0	1	1	5	5	0	10
ENSMUSG00000009185	1	1	1	1	0	0	0	0	0	0	0	0	0	0	1	5	5	0	10
ENSMUSG00000020737	1	0	0	1	1	0	1	0	0	0	-1	0	0	1	0	6	5	1	9
ENSMUSG00000027423	1	0	0	1	0	0	0	0	1	1	1	0	0	-1	0	6	5	1	9
ENSMUSG00000054720	0	0	0	1	1	0	1	0	1	0	0	0	0	0	1	5	5	0	10
ENSMUSG00000040188	1	0	0	1	0	0	0	0	1	0	0	0	0	1	1	5	5	0	10
ENSMUSG00000026770	1	0	1	1	0	0	0	0	0	1	1	0	0	0	0	5	5	0	10
ENSMUSG00000026480	1	0	0	1	0	0	1	0	1	1	0	0	0	0	0	5	5	0	10
ENSMUSG00000020677	0	0	0	1	0	0	0	0	1	0	1	1	0	0	1	5	5	0	10
ENSMUSG00000035851	0	0	0	1	1	1	0	0	-1	-1	1	1	0	0	0	7	5	2	8
ENSMUSG00000045328	1	0	0	1	0	0	0	0	1	1	1	0	0	0	-1	6	5	1	9
ENSMUSG00000026548	1	0	1	1	0	-1	0	0	0	0	0	0	0	1	1	6	5	1	9
ENSMUSG00000084279	1	0	1	1	0	0	0	0	1	0	1	0	0	0	0	5	5	0	10
ENSMUSG00000043439	0	0	0	1	0	1	0	0	1	1	1	0	0	0	0	5	5	0	10
ENSMUSG00000017550	1	0	0	0	0	0	0	0	1	1	1	1	0	0	0	5	5	0	10
ENSMUSG00000041560	1	0	0	0	-1	0	0	0	1	1	1	0	0	0	1	6	5	1	9
ENSMUSG00000038612	1	0	0	1	0	-1	0	0	0	0	-1	1	-1	1	1	8	5	3	7
ENSMUSG00000014850	1	0	0	0	-1	0	0	0	1	0	1	1	0	0	1	6	5	1	9
ENSMUSG00000022018	1	1	0	1	1	0	0	0	1	0	0	0	0	0	0	5	5	0	10
ENSMUSG00000028718	1	0	0	1	0	-1	0	0	0	1	1	1	0	0	-1	7	5	2	8
ENSMUSG00000034610	1	0	0	1	0	0	0	0	1	0	1	0	0	0	1	5	5	0	10
ENSMUSG00000093938	1	0	1	1	0	0	0	0	0	0	1	0	0	1	0	5	5	0	10
ENSMUSG00000004070	1	0	0	1	0	0	0	0	1	0	0	0	0	1	1	5	5	0	10
ENSMUSG00000015314	1	0	1	1	0	0	0	0	0	0	-1	1	0	0	1	6	5	1	9
ENSMUSG00000063406	0	0	0	1	1	1	0	0	1	1	0	0	0	0	0	5	5	0	10
ENSMUSG00000109729	1	1	0	1	0	0	0	0	0	0	0	0	0	1	1	5	5	0	10
ENSMUSG00000045538	0	0	0	1	0	0	0	0	1	1	0	1	0	0	1	5	5	0	10
ENSMUSG00000024590	1	0	1	1	0	0	0	0	-1	1	1	0	0	0	-1	7	5	2	8
ENSMUSG00000086289	1	0	0	1	0	0	0	0	-1	1	-1	0	0	1	1	7	5	2	8
ENSMUSG00000037075	1	0	0	1	1	0	0	0	-1	0	-1	0	0	1	1	7	5	2	8
ENSMUSG00000040054	0	0	0	1	0	-1	0	0	1	1	1	0	0	0	1	6	5	1	9
ENSMUSG00000034674	0	0	0	0	1	1	0	0	1	0	1	1	0	0	0	5	5	0	10
ENSMUSG00000039158	1	0	1	1	0	-1	0	0	-1	-1	1	0	0	-1	1	9	5	4	6
ENSMUSG00000083396	0	0	0	1	1	0	0	0	-1	-1	0	1	0	1	1	7	5	2	8
ENSMUSG00000083392	0	0	0	1	1	0	0	0	-1	0	0	1	0	1	1	6	5	1	9
ENSMUSG00000049892	1	1	0	1	1	0	0	0	1	0	0	0	0	0	0	5	5	0	10
ENSMUSG00000106209	1	1	0	1	0	0	0	0	-1	0	0	0	0	1	1	6	5	1	9
ENSMUSG00000028337	1	0	0	1	0	1	0	0	-1	0	0	0	0	1	1	6	5	1	9
ENSMUSG00000087477	1	0	0	1	0	0	1	0	0	0	0	0	0	1	1	5	5	0	10
ENSMUSG00000023249	1	0	0	1	0	0	0	0	1	0	1	0	0	1	0	5	5	0	10
ENSMUSG00000059142	0	0	0	1	0	0	0	0	1	0	1	1	0	0	1	5	5	0	10
ENSMUSG00000025351	1	0	1	1	0	0	0	0	1	1	0	0	0	0	0	5	5	0	10
ENSMUSG00000046207	0	0	0	1	0	0	0	0	1	1	1	0	0	0	1	5	5	0	10
ENSMUSG00000040584	0	0	0	0	0	0	0	0	0	1	1	0	1	1	1	5	5	0	10
ENSMUSG00000030654	1	0	0	1	-1	0	0	0	1	1	-1	0	0	1	0	7	5	2	8
ENSMUSG00000093768	1	0	0	1	0	0	0	0	1	0	0	0	0	1	1	5	5	0	10
ENSMUSG00000079553	1	0	0	1	0	0	0	0	1	1	1	0	0	0	-1	6	5	1	9
ENSMUSG00000043284	1	0	0	1	1	1	0	0	1	0	-1	0	0	0	0	6	5	1	9
ENSMUSG00000033576	1	1	1	1	0	0	0	0	0	0	0	1	0	0	0	5	5	0	10
ENSMUSG00000020901	1	0	1	1	0	0	0	0	1	-1	0	0	0	0	1	6	5	1	9
ENSMUSG00000040699	1	0	0	1	-1	0	0	0	1	1	-1	0	0	0	1	7	5	2	8
ENSMUSG00000034652	1	0	1	1	0	-1	0	0	0	1	0	0	0	0	1	6	5	1	9
ENSMUSG00000025509	1	0	0	1	0	0	0	0	1	0	0	1	0	0	1	5	5	0	10
ENSMUSG00000042759	1	0	0	1	0	0	0	0	0	1	1	0	0	0	1	5	5	0	10
ENSMUSG00000005410	1	0	1	1	0	1	0	0	1	0	0	0	0	0	-1	6	5	1	9
ENSMUSG00000098112	1	0	1	1	0	-1	0	0	1	-1	1	0	0	-1	0	8	5	3	7
ENSMUSG00000035299	1	0	0	1	0	0	0	0	1	0	-1	0	0	1	1	6	5	1	9
ENSMUSG00000027340	-1	0	0	1	1	1	0	0	-1	0	1	1	0	0	0	7	5	2	8
ENSMUSG00000017677	0	0	0	1	1	0	1	0	1	0	0	1	0	0	0	5	5	0	10
ENSMUSG00000021996	1	0	0	1	0	0	0	0	1	1	0	0	1	0	0	5	5	0	10
ENSMUSG00000030924	0	0	0	1	0	0	0	0	1	1	1	1	0	0	0	5	5	0	10
ENSMUSG00000030214	-1	0	1	1	0	0	0	0	1	1	0	0	0	0	1	6	5	1	9
ENSMUSG00000027962	1	0	1	1	0	1	0	0	0	-1	0	1	0	0	0	6	5	1	9
ENSMUSG00000046223	1	0	0	1	1	0	1	0	0	1	0	0	0	0	-1	6	5	1	9
ENSMUSG00000052760	1	0	1	1	0	0	0	0	0	0	0	0	0	1	1	5	5	0	10
ENSMUSG00000079889	0	0	0	0	1	1	1	0	0	0	0	0	0	1	1	5	5	0	10
ENSMUSG00000032175	1	0	0	1	0	0	0	0	-1	-1	1	0	0	1	1	7	5	2	8
ENSMUSG00000024002	1	0	0	1	0	0	0	0	1	0	1	1	0	0	0	5	5	0	10
ENSMUSG00000041057	1	0	0	1	1	0	0	0	0	0	-1	0	0	1	1	6	5	1	9
ENSMUSG00000027068	1	0	0	1	1	0	0	1	0	0	0	0	-1	1	0	6	5	1	9
ENSMUSG00000006445	1	0	0	1	1	0	1	0	1	0	0	0	-1	0	0	6	5	1	9
ENSMUSG00000040018	1	0	0	1	0	0	0	0	1	0	0	0	0	1	1	5	5	0	10
ENSMUSG00000021322	1	1	0	1	0	0	0	0	0	0	0	0	0	1	1	5	5	0	10
ENSMUSG00000022436	1	0	0	1	0	0	0	0	1	0	1	0	0	0	1	5	5	0	10
ENSMUSG00000085977	1	1	0	1	0	0	0	0	0	0	0	0	0	1	1	5	5	0	10
ENSMUSG00000024018	1	0	0	1	0	0	0	0	1	0	0	0	0	1	1	5	5	0	10
ENSMUSG00000044811	1	0	1	1	0	0	0	0	1	0	0	0	0	0	1	5	5	0	10
ENSMUSG00000073982	1	0	1	1	0	0	0	0	1	0	0	0	0	0	1	5	5	0	10
ENSMUSG00000036067	1	1	0	1	0	0	0	0	0	0	-1	0	0	1	1	6	5	1	9
ENSMUSG00000079071	1	1	0	1	0	0	0	0	0	0	0	0	0	1	1	5	5	0	10
ENSMUSG00000063800	1	0	0	1	-1	0	0	1	0	0	0	0	0	1	1	6	5	1	9
ENSMUSG00000029817	1	0	0	1	1	1	0	0	-1	0	0	0	0	1	0	6	5	1	9
ENSMUSG00000003037	1	0	0	1	0	0	0	0	1	1	0	0	0	0	1	5	5	0	10
ENSMUSG00000060591	1	0	0	1	0	0	1	0	-1	0	0	0	0	1	1	6	5	1	9
ENSMUSG00000033467	1	0	0	1	0	0	0	0	1	1	-1	0	0	0	1	6	5	1	9
ENSMUSG00000037548	1	0	1	1	0	0	0	0	1	0	0	0	0	0	1	5	5	0	10
ENSMUSG00000040659	1	0	1	1	1	0	0	0	1	0	0	0	0	0	0	5	5	0	10
ENSMUSG00000027883	-1	0	0	-1	0	0	0	0	1	1	1	0	0	1	1	7	5	2	8
ENSMUSG00000027882	1	0	0	1	0	0	0	1	1	0	0	0	0	0	1	5	5	0	10
ENSMUSG00000034165	1	0	0	1	1	0	0	0	1	-1	-1	0	0	1	0	7	5	2	8
ENSMUSG00000026355	1	0	0	1	0	0	0	0	1	1	0	0	0	1	0	5	5	0	10
ENSMUSG00000042719	1	0	0	1	0	1	0	0	0	0	-1	0	0	1	1	6	5	1	9
ENSMUSG00000059970	0	0	0	1	1	1	0	0	-1	1	1	0	0	0	0	6	5	1	9
ENSMUSG00000028680	1	0	0	1	1	-1	0	0	-1	1	0	1	0	0	0	7	5	2	8
ENSMUSG00000046169	1	1	0	1	0	0	0	0	0	-1	0	1	0	1	0	6	5	1	9
ENSMUSG00000035561	1	1	0	1	0	0	0	0	0	0	-1	0	0	1	1	6	5	1	9
ENSMUSG00000018362	0	0	0	1	1	0	1	0	-1	1	1	0	0	0	-1	7	5	2	8
ENSMUSG00000002797	1	0	0	1	0	0	0	0	1	-1	0	0	0	1	1	6	5	1	9
ENSMUSG00000053846	1	0	0	1	0	0	0	0	1	0	0	0	0	1	1	5	5	0	10
ENSMUSG00000052423	1	0	0	1	1	1	0	0	1	0	0	0	0	0	0	5	5	0	10
ENSMUSG00000107928	1	0	0	1	0	-1	0	0	1	1	0	0	0	0	1	6	5	1	9
ENSMUSG00000021486	1	0	0	1	0	0	0	0	1	1	1	-1	-1	0	0	7	5	2	8
ENSMUSG00000000247	1	0	0	1	0	1	0	0	0	0	0	0	0	1	1	5	5	0	10
ENSMUSG00000020124	1	0	0	1	0	0	0	0	1	0	1	0	0	0	1	5	5	0	10
ENSMUSG00000030789	0	0	1	1	0	-1	0	0	1	1	1	0	0	0	-1	7	5	2	8
ENSMUSG00000030786	1	0	0	1	0	0	0	0	1	1	1	0	0	0	0	5	5	0	10
ENSMUSG00000033781	1	0	0	1	0	0	1	0	-1	0	0	0	0	1	1	6	5	1	9
ENSMUSG00000038068	0	0	0	1	0	0	0	0	1	0	0	1	0	1	1	5	5	0	10
ENSMUSG00000051439	1	1	0	1	1	0	0	0	1	0	0	0	0	0	0	5	5	0	10
ENSMUSG00000013707	1	0	1	1	0	-1	0	0	1	0	0	0	0	0	1	6	5	1	9
ENSMUSG00000029084	0	0	1	1	0	0	0	0	1	1	1	0	0	0	0	5	5	0	10
ENSMUSG00000037697	1	0	0	1	-1	0	0	0	1	0	1	0	0	0	1	6	5	1	9
ENSMUSG00000038045	0	0	0	1	0	0	0	0	0	1	1	0	0	1	1	5	5	0	10
ENSMUSG00000070284	1	0	0	1	-1	0	1	0	0	1	0	0	0	1	0	6	5	1	9
ENSMUSG00000003226	0	0	0	1	0	0	0	0	-1	0	1	1	0	1	1	6	5	1	9
ENSMUSG00000029177	0	0	1	1	0	0	0	0	1	1	1	0	0	0	-1	6	5	1	9
ENSMUSG00000016257	1	0	0	1	1	0	0	0	1	0	1	0	0	0	0	5	5	0	10
ENSMUSG00000020184	0	0	0	1	0	1	0	0	-1	0	1	1	0	0	1	6	5	1	9
ENSMUSG00000003038	1	0	1	0	0	0	0	0	1	1	1	0	0	0	0	5	5	0	10
ENSMUSG00000024457	1	0	0	1	0	0	0	0	0	0	1	0	0	1	1	5	5	0	10
ENSMUSG00000038085	0	0	0	1	1	1	0	0	-1	0	1	0	0	0	1	6	5	1	9
ENSMUSG00000070871	0	0	0	1	1	0	0	0	1	1	0	0	0	1	0	5	5	0	10
ENSMUSG00000031103	1	0	0	1	0	0	0	0	1	0	1	0	0	0	1	5	5	0	10
ENSMUSG00000034330	1	0	1	1	0	0	0	0	-1	0	1	0	0	0	1	6	5	1	9
ENSMUSG00000050921	1	0	1	1	0	0	0	0	0	1	-1	0	0	0	1	6	5	1	9
ENSMUSG00000035683	1	0	0	1	0	0	0	0	1	1	1	0	0	0	-1	6	5	1	9
ENSMUSG00000026009	1	0	1	1	0	0	0	0	0	1	1	0	0	0	0	5	5	0	10
ENSMUSG00000044645	0	0	0	1	1	1	0	0	1	0	-1	1	0	0	0	6	5	1	9
ENSMUSG00000040616	1	0	0	1	0	0	0	0	1	0	0	0	0	1	1	5	5	0	10
ENSMUSG00000029110	1	0	0	1	1	0	1	0	-1	0	0	0	0	1	0	6	5	1	9
ENSMUSG00000028643	1	0	0	0	0	0	0	1	-1	1	0	0	0	1	1	6	5	1	9
ENSMUSG00000030707	1	0	1	1	0	0	1	0	1	0	0	0	0	-1	0	6	5	1	9
ENSMUSG00000054604	0	0	0	0	1	1	0	0	1	0	-1	0	-1	1	1	7	5	2	8
ENSMUSG00000039621	1	0	0	1	0	-1	0	0	1	0	1	0	0	0	1	6	5	1	9
ENSMUSG00000040152	1	0	0	1	1	0	0	0	1	0	1	0	-1	0	-1	7	5	2	8
ENSMUSG00000031165	1	0	1	1	0	0	0	0	1	0	0	0	0	0	1	5	5	0	10
ENSMUSG00000085295	1	0	0	1	0	1	0	0	0	0	0	0	0	1	1	5	5	0	10
ENSMUSG00000015937	1	0	0	1	0	0	0	0	1	0	1	0	0	1	0	5	5	0	10
ENSMUSG00000060063	1	0	1	1	0	0	0	0	1	0	1	0	0	0	0	5	5	0	10
ENSMUSG00000035004	1	1	0	1	0	1	0	0	0	0	0	0	0	0	1	5	5	0	10
ENSMUSG00000008496	1	0	0	1	0	0	0	0	0	1	1	0	0	0	1	5	5	0	10
ENSMUSG00000027570	1	1	0	1	0	0	0	0	0	1	0	0	0	1	0	5	5	0	10
ENSMUSG00000072082	1	0	0	1	0	0	0	0	1	1	1	-1	0	0	-1	7	5	2	8
ENSMUSG00000026622	1	0	1	1	0	0	-1	0	-1	1	1	0	0	0	-1	8	5	3	7
ENSMUSG00000062232	0	0	0	1	0	0	0	1	0	0	1	0	0	1	1	5	5	0	10
ENSMUSG00000034390	1	0	0	1	0	0	0	0	0	1	1	0	0	0	1	5	5	0	10
ENSMUSG00000095788	1	1	1	1	0	0	0	0	0	0	0	0	0	0	1	5	5	0	10
ENSMUSG00000011267	1	0	0	1	1	0	1	0	1	0	0	0	0	0	0	5	5	0	10
ENSMUSG00000025165	1	1	0	1	0	0	1	0	0	0	0	0	0	0	1	5	5	0	10
ENSMUSG00000114635	1	0	0	1	0	0	0	1	0	0	-1	0	0	1	1	6	5	1	9
ENSMUSG00000039005	1	0	0	1	-1	0	0	0	1	0	-1	1	-1	0	1	8	5	3	7
ENSMUSG00000086656	1	1	0	1	0	0	0	0	-1	0	0	0	0	1	1	6	5	1	9
ENSMUSG00000030766	0	0	0	1	0	0	0	0	1	0	1	0	0	1	1	5	5	0	10
ENSMUSG00000097544	1	1	0	1	0	0	0	0	0	0	0	0	0	1	1	5	5	0	10
ENSMUSG00000101279	0	0	0	1	0	0	0	0	0	1	1	0	0	1	1	5	5	0	10
ENSMUSG00000030269	0	0	0	1	-1	0	0	0	1	0	1	0	0	1	1	6	5	1	9
ENSMUSG00000008393	1	0	0	1	0	0	0	0	1	0	1	0	0	0	1	5	5	0	10
ENSMUSG00000000957	0	0	1	1	-1	1	0	0	1	1	0	0	-1	0	0	7	5	2	8
ENSMUSG00000037262	1	0	0	1	1	0	0	0	1	0	1	0	0	0	0	5	5	0	10
ENSMUSG00000040428	1	1	0	1	0	0	0	0	-1	0	0	0	0	1	1	6	5	1	9
ENSMUSG00000037266	1	0	0	1	0	0	0	0	1	0	-1	0	0	1	1	6	5	1	9
ENSMUSG00000039396	1	0	0	1	0	0	0	0	0	1	1	1	0	0	-1	6	5	1	9
ENSMUSG00000089714	0	0	0	1	0	0	0	0	0	1	1	0	0	1	1	5	5	0	10
ENSMUSG00000035392	1	0	0	1	0	0	0	0	1	0	-1	0	0	1	1	6	5	1	9
ENSMUSG00000104126	0	0	0	1	1	0	0	0	0	0	0	1	0	1	1	5	5	0	10
ENSMUSG00000037095	1	1	0	1	0	1	0	0	1	0	0	0	0	0	0	5	5	0	10
ENSMUSG00000026605	0	0	1	1	0	0	0	0	1	1	1	0	0	0	-1	6	5	1	9
ENSMUSG00000020476	1	0	0	1	-1	0	0	0	1	0	0	0	0	1	1	6	5	1	9
ENSMUSG00000029513	1	0	0	1	1	0	1	0	1	0	0	0	-1	0	0	6	5	1	9
ENSMUSG00000021408	1	0	0	1	0	0	0	0	1	0	1	1	0	0	0	5	5	0	10
ENSMUSG00000042351	1	0	1	1	0	0	0	0	0	0	1	0	0	0	1	5	5	0	10
ENSMUSG00000042354	1	0	0	1	1	1	1	0	0	0	-1	0	0	0	0	6	5	1	9
ENSMUSG00000078942	1	0	0	1	0	-1	0	0	0	1	1	0	0	0	1	6	5	1	9
ENSMUSG00000066800	1	0	0	1	0	0	0	0	1	1	1	0	0	0	0	5	5	0	10
ENSMUSG00000024835	1	0	0	1	-1	0	0	0	1	1	1	0	0	0	0	6	5	1	9
ENSMUSG00000034786	1	0	1	1	0	0	0	0	1	0	0	0	0	0	1	5	5	0	10
ENSMUSG00000003541	0	0	0	1	1	1	1	1	-1	0	0	0	0	0	0	6	5	1	9
ENSMUSG00000004837	0	0	1	1	0	0	0	0	1	0	1	0	0	0	1	5	5	0	10
ENSMUSG00000021877	1	0	0	1	0	0	0	0	1	1	-1	0	0	1	0	6	5	1	9
ENSMUSG00000036478	1	0	1	1	0	0	0	0	-1	1	-1	0	0	0	1	7	5	2	8
ENSMUSG00000097006	1	1	0	1	0	0	0	0	0	0	0	0	0	1	1	5	5	0	10
ENSMUSG00000040850	0	0	0	1	0	0	0	0	-1	1	1	0	0	1	1	6	5	1	9
ENSMUSG00000107802	1	0	0	1	0	0	0	0	1	0	0	0	0	1	1	5	5	0	10
ENSMUSG00000074656	1	0	0	1	1	1	0	0	1	0	0	0	0	0	0	5	5	0	10
ENSMUSG00000039048	1	0	0	1	0	0	0	0	1	0	0	0	0	1	1	5	5	0	10
ENSMUSG00000045980	1	0	0	1	-1	-1	0	0	1	1	1	0	0	0	0	7	5	2	8
ENSMUSG00000049988	1	1	1	1	0	0	0	0	0	0	0	0	0	0	1	5	5	0	10
ENSMUSG00000024818	1	0	0	1	0	0	0	0	1	0	1	0	0	0	1	5	5	0	10
ENSMUSG00000048277	1	0	1	1	-1	0	0	0	1	1	-1	-1	0	0	0	8	5	3	7
ENSMUSG00000048118	0	0	0	1	0	0	0	0	0	0	1	1	0	1	1	5	5	0	10
ENSMUSG00000031453	1	0	0	1	0	0	0	0	1	0	1	1	0	0	0	5	5	0	10
ENSMUSG00000056268	1	0	0	1	0	0	0	0	0	0	1	0	0	1	1	5	5	0	10
ENSMUSG00000022552	1	0	0	1	0	0	0	0	1	0	0	0	0	1	1	5	5	0	10
ENSMUSG00000035354	1	0	0	1	-1	0	0	0	1	0	0	0	0	1	1	6	5	1	9
ENSMUSG00000052566	1	0	0	1	0	0	0	0	1	1	0	0	0	0	1	5	5	0	10
ENSMUSG00000113328	1	0	0	0	0	1	0	0	0	0	1	0	0	1	1	5	5	0	10
ENSMUSG00000039981	1	0	0	1	0	0	0	0	1	1	0	0	0	0	1	5	5	0	10
ENSMUSG00000039989	1	0	0	1	1	0	0	0	1	0	-1	0	-1	0	1	7	5	2	8
ENSMUSG00000026641	1	0	0	1	0	0	0	0	-1	0	1	0	0	1	1	6	5	1	9
ENSMUSG00000007080	1	0	0	1	0	0	0	0	1	1	1	0	0	0	-1	6	5	1	9
ENSMUSG00000014905	0	0	0	1	1	0	0	0	1	1	-1	1	0	0	0	6	5	1	9
ENSMUSG00000021039	1	0	0	0	0	1	0	0	-1	1	0	0	0	1	1	6	5	1	9
ENSMUSG00000079323	1	1	0	1	0	0	0	0	-1	0	0	0	0	1	1	6	5	1	9
ENSMUSG00000024121	1	0	0	1	0	1	0	0	1	0	-1	0	0	0	1	6	5	1	9
ENSMUSG00000001228	1	0	1	1	0	0	0	0	-1	1	1	0	0	0	-1	7	5	2	8
ENSMUSG00000043931	1	0	1	1	0	0	0	0	0	1	1	0	0	0	0	5	5	0	10
ENSMUSG00000026436	1	0	0	1	0	0	0	0	1	0	1	0	0	0	1	5	5	0	10
ENSMUSG00000026433	1	0	0	1	0	-1	0	0	1	0	1	0	0	1	0	6	5	1	9
ENSMUSG00000047423	1	0	0	1	0	0	0	0	1	0	-1	0	0	1	1	6	5	1	9
ENSMUSG00000081671	1	0	1	1	0	0	0	0	1	0	1	0	0	0	0	5	5	0	10
ENSMUSG00000057110	1	0	0	1	0	0	0	0	-1	0	1	0	1	0	1	6	5	1	9
ENSMUSG00000063550	1	0	0	1	0	0	0	0	0	0	0	1	0	1	1	5	5	0	10
ENSMUSG00000025804	1	0	1	1	0	1	0	0	0	1	0	0	0	0	-1	6	5	1	9
ENSMUSG00000037958	1	0	0	1	1	0	0	0	0	0	0	1	0	0	1	5	5	0	10
ENSMUSG00000017715	1	0	0	1	0	0	0	0	1	0	1	0	0	1	0	5	5	0	10
ENSMUSG00000104988	1	1	0	0	0	0	0	0	0	0	1	0	0	1	1	5	5	0	10
ENSMUSG00000089875	1	0	0	1	0	0	0	0	0	0	1	0	0	1	1	5	5	0	10
ENSMUSG00000023940	1	0	0	1	0	0	0	0	0	1	1	1	0	0	-1	6	5	1	9
ENSMUSG00000036943	1	0	0	1	1	0	0	0	0	1	0	1	0	0	0	5	5	0	10
ENSMUSG00000019960	0	0	0	0	1	0	1	0	1	1	-1	1	-1	0	-1	8	5	3	7
ENSMUSG00000112627	1	1	0	1	0	0	0	0	-1	0	0	0	0	1	1	6	5	1	9
ENSMUSG00000049643	1	0	0	1	0	0	0	0	-1	1	1	0	0	0	1	6	5	1	9
ENSMUSG00000034311	0	0	0	1	0	-1	0	0	1	1	1	1	0	0	-1	7	5	2	8
ENSMUSG00000032333	1	0	0	1	0	0	0	0	-1	1	0	0	-1	1	1	7	5	2	8
ENSMUSG00000021814	1	0	0	1	0	0	0	0	0	1	1	0	0	1	0	5	5	0	10
ENSMUSG00000097352	1	0	0	1	0	0	0	0	0	1	1	0	0	0	1	5	5	0	10
ENSMUSG00000024241	0	0	0	0	0	0	0	0	1	1	1	1	0	0	1	5	5	0	10
ENSMUSG00000022864	0	0	0	1	1	1	0	0	1	0	-1	1	0	0	0	6	5	1	9
ENSMUSG00000022863	0	0	0	1	1	1	0	0	1	0	-1	1	0	0	0	6	5	1	9
ENSMUSG00000027333	1	0	0	1	0	0	0	0	-1	1	-1	0	0	1	1	7	5	2	8
ENSMUSG00000055435	1	0	0	1	0	0	0	0	1	1	-1	1	0	0	0	6	5	1	9
ENSMUSG00000011179	1	0	0	1	1	1	0	0	-1	1	-1	0	0	0	0	7	5	2	8
ENSMUSG00000039783	1	0	0	1	0	0	0	0	0	1	0	0	0	1	1	5	5	0	10
ENSMUSG00000003644	0	0	1	1	0	-1	0	0	1	1	1	0	0	0	0	6	5	1	9
ENSMUSG00000028245	0	0	0	1	0	0	0	0	1	0	1	0	0	1	1	5	5	0	10
ENSMUSG00000083261	0	0	0	1	1	0	0	0	-1	-1	0	1	0	1	1	7	5	2	8
ENSMUSG00000004936	1	0	0	1	0	0	0	0	1	1	-1	0	0	1	0	6	5	1	9
ENSMUSG00000041449	1	1	0	1	0	0	0	1	0	0	-1	0	0	0	1	6	5	1	9
ENSMUSG00000026219	1	0	0	1	0	0	0	0	1	0	1	0	0	1	0	5	5	0	10
ENSMUSG00000031431	1	0	0	1	0	0	0	0	1	0	-1	1	0	0	1	6	5	1	9
ENSMUSG00000029405	1	0	0	1	0	0	0	0	-1	0	-1	1	0	1	1	7	5	2	8
ENSMUSG00000022241	1	0	0	1	1	0	0	0	1	0	-1	1	0	0	0	6	5	1	9
ENSMUSG00000029923	1	0	0	1	-1	0	0	0	0	1	0	0	0	1	1	6	5	1	9
ENSMUSG00000029291	1	0	0	1	0	0	0	0	0	0	1	0	0	1	1	5	5	0	10
ENSMUSG00000051735	1	0	1	1	0	0	0	0	1	0	1	0	0	0	0	5	5	0	10
ENSMUSG00000098973	1	1	0	0	0	1	0	0	1	1	0	0	0	0	0	5	5	0	10
ENSMUSG00000110104	1	0	0	1	0	0	1	0	-1	0	0	0	0	1	1	6	5	1	9
ENSMUSG00000042622	1	1	0	1	1	0	0	0	-1	1	0	0	-1	0	0	7	5	2	8
ENSMUSG00000092463	1	1	1	1	0	0	0	0	0	0	-1	0	0	0	1	6	5	1	9
ENSMUSG00000019256	-1	0	0	0	1	0	1	0	1	1	-1	0	1	0	0	7	5	2	8
ENSMUSG00000085501	1	1	0	1	0	0	0	0	0	0	0	0	0	1	1	5	5	0	10
ENSMUSG00000021366	0	0	0	1	0	0	0	0	1	1	1	0	0	0	1	5	5	0	10
ENSMUSG00000032845	0	0	0	1	1	1	0	0	0	1	1	0	0	0	0	5	5	0	10
ENSMUSG00000030990	0	0	0	1	0	0	0	1	1	0	0	0	0	1	1	5	5	0	10
ENSMUSG00000027379	0	0	1	1	0	-1	0	0	1	1	1	0	0	0	-1	7	5	2	8
ENSMUSG00000096957	1	1	0	1	0	0	0	0	1	0	0	0	0	0	1	5	5	0	10
ENSMUSG00000037411	1	1	0	1	1	0	0	0	0	0	0	1	-1	0	-1	7	5	2	8
ENSMUSG00000023015	1	0	0	1	0	-1	0	0	1	1	1	0	0	0	-1	7	5	2	8
ENSMUSG00000020707	1	0	0	1	0	0	0	0	1	0	0	0	0	1	1	5	5	0	10
ENSMUSG00000039770	1	0	0	1	1	0	0	0	1	0	0	1	0	0	0	5	5	0	10
ENSMUSG00000089942	1	0	1	1	0	0	0	0	0	1	0	0	0	0	1	5	5	0	10
ENSMUSG00000068735	1	0	0	0	-1	0	0	0	1	1	1	0	0	1	0	6	5	1	9
ENSMUSG00000060509	0	0	1	1	0	1	0	0	0	0	0	0	0	1	1	5	5	0	10
ENSMUSG00000026708	1	0	0	1	1	0	0	0	0	0	1	1	0	0	0	5	5	0	10
ENSMUSG00000097439	1	0	0	1	0	0	0	0	0	0	1	0	0	1	1	5	5	0	10
ENSMUSG00000041313	1	0	0	1	1	1	0	0	1	0	-1	0	0	0	0	6	5	1	9
ENSMUSG00000031389	1	0	0	1	-1	0	0	0	1	0	1	0	0	0	1	6	5	1	9
ENSMUSG00000035547	0	0	0	0	0	0	0	0	1	1	1	0	0	1	1	5	5	0	10
ENSMUSG00000057191	1	1	1	1	0	0	0	0	-1	0	0	0	0	0	1	6	5	1	9
ENSMUSG00000028873	0	0	1	1	0	0	0	0	1	1	1	0	0	0	-1	6	5	1	9
ENSMUSG00000029471	1	0	0	0	0	0	0	0	1	0	1	0	0	1	1	5	5	0	10
ENSMUSG00000086866	1	1	0	1	0	0	0	0	0	0	0	0	0	1	1	5	5	0	10
ENSMUSG00000052812	0	0	0	0	0	0	0	0	1	0	1	1	0	1	1	5	5	0	10
ENSMUSG00000020115	1	0	0	1	0	0	0	0	1	0	1	0	0	0	1	5	5	0	10
ENSMUSG00000059108	1	1	0	1	0	0	0	0	0	0	0	0	0	1	1	5	5	0	10
ENSMUSG00000029648	0	0	0	1	0	0	0	0	1	1	0	0	0	1	1	5	5	0	10
ENSMUSG00000069844	1	0	0	1	0	0	0	0	0	1	0	1	0	0	1	5	5	0	10
ENSMUSG00000061288	0	0	0	1	0	0	0	0	1	0	1	0	0	1	1	5	5	0	10
ENSMUSG00000032412	1	0	0	1	1	0	0	0	1	0	0	-1	0	1	0	6	5	1	9
ENSMUSG00000036246	1	0	0	1	0	0	0	0	1	-1	1	0	0	0	1	6	5	1	9
ENSMUSG00000005470	1	0	0	1	0	0	0	0	1	1	1	0	0	0	-1	6	5	1	9
ENSMUSG00000031948	1	0	0	1	0	0	0	0	1	1	0	0	0	1	0	5	5	0	10
ENSMUSG00000090103	1	0	0	1	0	0	0	0	0	1	0	0	0	1	1	5	5	0	10
ENSMUSG00000028859	1	0	0	1	0	-1	0	0	1	1	0	0	0	0	1	6	5	1	9
ENSMUSG00000035828	1	0	0	1	1	0	0	0	1	0	-1	1	-1	-1	0	8	5	3	7
ENSMUSG00000033970	1	0	0	1	0	0	0	0	1	0	0	0	0	1	1	5	5	0	10
ENSMUSG00000070372	1	0	0	1	1	0	0	0	1	1	0	0	0	0	0	5	5	0	10
ENSMUSG00000107017	1	1	0	1	0	0	0	0	0	0	0	0	1	1	0	5	5	0	10
ENSMUSG00000048865	1	0	1	1	0	0	0	0	0	0	1	0	0	0	1	5	5	0	10
ENSMUSG00000092283	1	0	1	1	0	0	0	0	-1	1	0	0	0	0	1	6	5	1	9
ENSMUSG00000032193	0	0	0	0	0	1	1	0	1	1	1	0	0	0	-1	6	5	1	9
ENSMUSG00000024989	0	0	1	1	0	0	0	0	1	1	1	0	0	0	-1	6	5	1	9
ENSMUSG00000026068	1	0	1	1	0	0	0	0	1	0	1	0	0	0	0	5	5	0	10
ENSMUSG00000003421	1	0	0	1	-1	0	0	0	1	0	1	0	0	0	1	6	5	1	9
ENSMUSG00000030220	1	0	1	1	0	0	1	0	1	0	0	0	0	0	0	5	5	0	10
ENSMUSG00000030223	1	0	0	1	0	1	0	0	0	0	0	0	0	1	1	5	5	0	10
ENSMUSG00000022180	1	0	0	1	0	1	0	0	0	0	0	0	0	1	1	5	5	0	10
ENSMUSG00000050533	1	0	0	1	0	1	0	1	0	0	0	0	0	0	1	5	5	0	10
ENSMUSG00000017057	1	0	0	1	1	1	0	0	-1	0	0	0	0	1	0	6	5	1	9
ENSMUSG00000024036	1	0	0	1	0	0	0	0	1	1	1	0	0	0	0	5	5	0	10
ENSMUSG00000097479	1	0	0	1	0	0	0	0	-1	0	0	1	0	1	1	6	5	1	9
ENSMUSG00000014773	1	0	0	1	1	0	0	0	0	1	-1	0	0	1	0	6	5	1	9
ENSMUSG00000032745	0	0	0	1	1	1	0	0	0	0	0	1	0	0	1	5	5	0	10
ENSMUSG00000025511	1	1	0	1	1	0	0	0	1	0	0	0	-1	0	0	6	5	1	9
ENSMUSG00000032577	0	0	1	1	0	0	0	0	1	1	0	0	0	0	1	5	5	0	10
ENSMUSG00000006398	0	0	1	1	-1	-1	0	0	1	1	1	0	-1	0	-1	9	5	4	6
ENSMUSG00000021686	1	0	0	1	-1	0	0	0	1	0	1	1	0	0	0	6	5	1	9
ENSMUSG00000029304	0	0	0	1	0	0	0	1	1	1	1	-1	0	0	-1	7	5	2	8
ENSMUSG00000064090	1	0	0	1	0	0	0	0	0	0	1	0	0	1	1	5	5	0	10
ENSMUSG00000028970	0	0	0	1	0	0	0	0	0	1	1	0	1	1	0	5	5	0	10
ENSMUSG00000020152	1	0	0	1	1	0	0	0	-1	0	0	0	0	1	1	6	5	1	9
ENSMUSG00000024053	1	0	0	1	0	0	0	0	1	1	1	0	0	0	0	5	5	0	10
ENSMUSG00000090125	0	0	0	1	1	1	0	0	0	0	0	0	0	1	1	5	5	0	10
ENSMUSG00000036526	1	0	0	1	0	-1	0	0	1	0	1	0	0	0	1	6	5	1	9
ENSMUSG00000000290	1	0	1	1	0	-1	1	0	1	0	0	0	0	0	0	6	5	1	9
ENSMUSG00000001707	1	0	0	1	1	1	1	0	0	0	-1	0	0	0	0	6	5	1	9
ENSMUSG00000067017	1	0	0	1	1	0	0	0	1	1	0	0	0	0	0	5	5	0	10
ENSMUSG00000030208	-1	0	0	1	1	0	0	0	1	1	1	0	0	0	-1	7	5	2	8
ENSMUSG00000030203	0	0	0	0	1	0	0	0	1	1	1	1	0	0	0	5	5	0	10
ENSMUSG00000035186	1	1	1	1	0	0	0	0	1	0	0	0	0	0	0	5	5	0	10
ENSMUSG00000069083	0	0	0	1	1	0	1	0	-1	1	1	0	0	0	-1	7	5	2	8
ENSMUSG00000045763	1	0	0	1	0	1	1	0	-1	1	-1	0	0	0	0	7	5	2	8
ENSMUSG00000028159	1	0	0	1	0	0	0	0	1	0	0	1	0	0	1	5	5	0	10
ENSMUSG00000021149	1	0	0	1	1	1	1	0	-1	0	-1	0	0	0	0	7	5	2	8
ENSMUSG00000018707	1	0	0	1	-1	0	0	0	-1	0	1	0	0	1	1	7	5	2	8
ENSMUSG00000024013	0	0	0	1	-1	0	0	0	1	1	0	0	0	1	1	6	5	1	9
ENSMUSG00000068758	1	0	0	1	0	0	0	0	1	0	1	0	0	0	1	5	5	0	10
ENSMUSG00000026819	0	0	0	1	1	0	1	0	0	0	-1	1	0	1	0	6	5	1	9
ENSMUSG00000044147	1	0	0	1	0	0	1	0	1	1	0	0	-1	0	0	6	5	1	9
ENSMUSG00000107222	1	1	0	1	0	0	0	0	0	0	0	0	0	1	1	5	5	0	10
ENSMUSG00000041515	1	0	1	1	0	-1	0	0	1	1	0	0	0	0	0	6	5	1	9
ENSMUSG00000022945	1	0	0	1	0	0	0	0	1	1	1	0	0	0	0	5	5	0	10
ENSMUSG00000059796	1	0	0	1	1	0	1	0	1	-1	-1	0	0	0	0	7	5	2	8
ENSMUSG00000027091	1	0	0	1	1	0	0	0	1	0	1	0	0	0	0	5	5	0	10
ENSMUSG00000034116	1	0	1	1	0	0	0	0	1	0	0	0	0	0	1	5	5	0	10
ENSMUSG00000015880	1	0	0	1	0	0	0	0	0	1	1	1	0	0	-1	6	5	1	9
ENSMUSG00000046179	1	0	0	1	0	0	0	0	1	1	1	0	0	0	0	5	5	0	10
ENSMUSG00000028362	1	0	0	1	0	0	0	0	0	1	-1	0	0	1	1	6	5	1	9
ENSMUSG00000028410	0	0	0	1	1	1	0	0	-1	-1	0	0	0	1	1	7	5	2	8
ENSMUSG00000020010	1	1	0	1	0	0	0	0	1	0	0	0	0	0	1	5	5	0	10
ENSMUSG00000044827	1	0	1	1	0	0	0	0	0	1	0	0	-1	0	1	6	5	1	9
ENSMUSG00000033799	1	0	0	1	0	0	0	0	1	0	0	0	0	1	1	5	5	0	10
ENSMUSG00000097534	1	0	0	1	0	0	0	0	0	0	1	0	0	1	1	5	5	0	10
ENSMUSG00000031792	1	0	0	1	0	1	0	0	0	0	0	0	0	1	1	5	5	0	10
ENSMUSG00000025491	1	0	0	1	0	0	0	0	-1	1	0	0	0	1	1	6	5	1	9
ENSMUSG00000034560	1	0	0	1	0	0	0	0	1	0	0	1	0	1	0	5	5	0	10
ENSMUSG00000039308	1	0	0	1	-1	0	0	0	1	0	0	0	0	1	1	6	5	1	9
ENSMUSG00000039934	0	0	0	1	-1	-1	0	0	1	-1	1	0	0	1	1	8	5	3	7
ENSMUSG00000018983	0	0	0	1	0	0	0	0	1	1	1	1	0	0	0	5	5	0	10
ENSMUSG00000027522	0	0	0	1	0	0	0	0	-1	0	1	1	0	1	1	6	5	1	9
ENSMUSG00000033470	1	1	0	1	0	0	0	0	0	1	0	0	0	0	1	5	5	0	10
ENSMUSG00000037572	0	0	0	1	0	0	0	0	1	1	1	1	0	0	-1	6	5	1	9
ENSMUSG00000026121	1	0	0	1	1	0	0	0	1	1	0	0	-1	0	-1	7	5	2	8
ENSMUSG00000017831	0	0	0	1	1	0	0	0	1	0	1	0	0	1	0	5	5	0	10
ENSMUSG00000028341	1	1	0	0	1	0	0	1	0	1	-1	0	-1	0	0	7	5	2	8
ENSMUSG00000095028	1	1	1	1	0	0	0	0	0	0	0	0	0	0	1	5	5	0	10
ENSMUSG00000114375	1	1	0	1	0	0	0	0	0	0	0	0	0	1	1	5	5	0	10
ENSMUSG00000001473	1	0	0	1	1	0	0	0	1	1	-1	0	-1	0	-1	8	5	3	7
ENSMUSG00000019132	1	0	0	1	0	0	0	0	-1	1	1	0	0	1	0	6	5	1	9
ENSMUSG00000024222	1	1	0	1	0	0	0	0	-1	0	1	0	0	1	0	6	5	1	9
ENSMUSG00000030793	1	1	1	1	0	0	0	0	0	0	1	0	0	0	0	5	5	0	10
ENSMUSG00000041235	1	0	0	1	0	0	0	0	-1	1	1	0	0	1	0	6	5	1	9
ENSMUSG00000055184	1	0	0	1	0	1	0	0	-1	0	0	0	0	1	1	6	5	1	9
ENSMUSG00000108353	1	0	1	1	0	0	0	0	0	1	1	0	0	0	0	5	5	0	10
ENSMUSG00000024056	1	0	1	1	0	0	0	0	0	1	1	0	0	0	-1	6	5	1	9
ENSMUSG00000024054	1	0	0	1	0	0	0	0	0	1	1	0	0	1	0	5	5	0	10
ENSMUSG00000024052	1	0	0	1	0	0	0	0	1	0	1	0	0	0	1	5	5	0	10
ENSMUSG00000020101	0	0	1	1	0	-1	0	0	1	1	1	0	0	-1	0	7	5	2	8
ENSMUSG00000004508	0	0	0	1	1	0	0	0	1	0	1	0	0	-1	1	6	5	1	9
ENSMUSG00000004846	1	0	0	1	0	0	1	0	1	0	0	0	0	1	0	5	5	0	10
ENSMUSG00000033450	1	0	0	1	0	1	0	0	-1	0	0	0	0	1	1	6	5	1	9
ENSMUSG00000060860	1	0	0	1	0	0	0	0	1	1	1	0	0	0	0	5	5	0	10
ENSMUSG00000020423	1	0	0	1	-1	-1	-1	0	1	1	-1	1	-1	0	0	10	5	5	5
ENSMUSG00000043336	0	0	0	0	1	1	0	0	1	0	0	1	-1	1	0	6	5	1	9
ENSMUSG00000083678	1	0	0	1	1	0	0	0	0	0	0	0	0	1	1	5	5	0	10
ENSMUSG00000022488	1	0	1	1	0	-1	0	0	1	0	1	0	0	0	0	6	5	1	9
ENSMUSG00000047867	0	0	1	1	0	0	0	0	1	1	1	0	0	0	0	5	5	0	10
ENSMUSG00000106415	1	0	0	1	0	0	0	0	-1	0	1	0	0	1	1	6	5	1	9
ENSMUSG00000041219	1	0	0	1	0	0	0	0	1	1	1	0	0	0	0	5	5	0	10
ENSMUSG00000057561	1	0	0	1	1	1	1	0	-1	0	-1	0	0	0	0	7	5	2	8
ENSMUSG00000021298	1	0	1	1	0	1	0	0	0	0	-1	0	0	0	1	6	5	1	9
ENSMUSG00000039208	1	0	0	1	1	0	0	0	1	-1	-1	0	0	0	1	7	5	2	8
ENSMUSG00000018927	0	0	0	1	0	0	1	0	1	1	1	0	0	0	0	5	5	0	10
ENSMUSG00000035697	1	0	1	1	0	-1	0	0	1	0	1	0	0	0	0	6	5	1	9
ENSMUSG00000028064	1	0	1	1	0	0	0	0	1	-1	-1	0	0	0	1	7	5	2	8
ENSMUSG00000015766	0	0	0	1	0	1	0	0	1	1	1	0	0	0	0	5	5	0	10
ENSMUSG00000016833	1	0	0	1	0	0	0	0	1	0	0	0	0	1	1	5	5	0	10
ENSMUSG00000100838	1	0	0	1	0	0	0	0	1	1	1	0	0	0	0	5	5	0	10
ENSMUSG00000040084	1	0	0	1	0	0	0	0	1	1	1	0	0	0	-1	6	5	1	9
ENSMUSG00000027381	0	0	0	1	1	0	0	0	1	1	-1	1	0	-1	0	7	5	2	8
ENSMUSG00000027466	1	0	0	1	0	0	0	0	1	0	0	0	0	1	1	5	5	0	10
ENSMUSG00000005054	1	0	0	1	0	0	0	0	1	1	0	0	0	0	1	5	5	0	10
ENSMUSG00000026166	1	1	0	0	1	0	1	0	1	0	0	0	0	0	0	5	5	0	10
ENSMUSG00000030167	1	1	1	1	0	0	0	0	0	0	1	0	0	0	0	5	5	0	10
ENSMUSG00000004707	1	0	1	1	0	0	0	0	1	-1	-1	0	0	0	1	7	5	2	8
ENSMUSG00000022711	1	0	0	1	0	0	0	0	1	0	1	0	0	0	1	5	5	0	10
ENSMUSG00000047534	1	0	0	1	0	0	0	0	0	1	1	1	0	0	0	5	5	0	10
ENSMUSG00000028478	1	0	0	1	0	0	0	0	1	1	1	-1	0	0	0	6	5	1	9
ENSMUSG00000033885	1	0	0	1	0	0	0	0	-1	0	0	1	0	1	1	6	5	1	9
ENSMUSG00000041769	1	0	0	1	1	0	0	0	1	0	1	0	0	0	0	5	5	0	10
ENSMUSG00000027715	1	0	0	1	0	0	0	0	1	1	1	0	0	0	-1	6	5	1	9
ENSMUSG00000006519	1	0	1	1	0	0	0	0	1	0	-1	0	0	0	1	6	5	1	9
ENSMUSG00000040414	1	0	0	1	0	0	0	0	1	0	0	0	0	1	1	5	5	0	10
ENSMUSG00000090246	1	0	0	1	0	0	0	0	0	0	1	0	0	1	1	5	5	0	10
ENSMUSG00000069910	1	0	0	1	0	0	0	0	0	1	1	0	0	0	1	5	5	0	10
ENSMUSG00000024843	0	0	0	1	1	1	0	0	1	-1	-1	1	0	0	0	7	5	2	8
ENSMUSG00000019876	1	1	0	1	0	0	0	1	0	1	0	0	0	0	0	5	5	0	10
ENSMUSG00000027313	1	0	0	0	1	1	0	0	1	0	0	1	0	0	0	5	5	0	10
ENSMUSG00000087700	1	0	0	1	1	0	0	0	1	1	0	0	0	0	0	5	5	0	10
ENSMUSG00000099843	1	0	0	1	0	1	0	0	0	1	0	0	0	0	1	5	5	0	10
ENSMUSG00000024360	1	0	0	1	1	1	0	0	-1	1	0	0	0	0	0	6	5	1	9
ENSMUSG00000000555	1	0	0	0	1	1	0	0	1	0	0	0	-1	1	0	6	5	1	9
ENSMUSG00000101188	1	0	0	1	1	0	1	0	1	0	-1	0	-1	0	0	7	5	2	8
ENSMUSG00000030144	1	1	0	1	0	1	0	0	0	0	0	0	0	0	1	5	5	0	10
ENSMUSG00000041959	0	0	0	1	0	0	0	0	1	1	1	0	0	1	0	5	5	0	10
ENSMUSG00000020863	0	0	0	0	0	1	0	0	1	-1	1	1	0	1	0	6	5	1	9
ENSMUSG00000016831	1	0	0	1	1	0	0	0	-1	0	0	0	0	1	1	6	5	1	9
ENSMUSG00000029501	1	0	0	1	-1	0	0	0	1	0	0	0	0	1	1	6	5	1	9
ENSMUSG00000066878	0	0	0	1	1	0	1	0	-1	1	1	0	0	0	-1	7	5	2	8
ENSMUSG00000030748	1	0	0	1	1	0	0	0	1	1	-1	0	0	0	0	6	5	1	9
ENSMUSG00000001542	0	0	0	1	0	0	0	0	1	1	1	0	0	1	0	5	5	0	10
ENSMUSG00000021250	1	1	1	0	-1	-1	-1	0	-1	1	0	0	-1	1	0	10	5	5	5
ENSMUSG00000029082	1	0	1	1	0	0	0	0	1	0	0	0	0	0	1	5	5	0	10
ENSMUSG00000056216	1	0	0	1	1	0	0	0	1	0	0	1	0	0	0	5	5	0	10
ENSMUSG00000020399	1	0	1	1	0	0	0	0	0	1	1	-1	0	0	0	6	5	1	9
ENSMUSG00000028028	1	1	0	1	0	0	0	0	-1	0	0	0	0	1	1	6	5	1	9
ENSMUSG00000068220	1	0	0	0	0	0	1	0	1	1	1	-1	0	0	-1	7	5	2	8
ENSMUSG00000020611	1	0	0	1	1	1	0	0	-1	0	0	0	0	0	1	6	5	1	9
ENSMUSG00000114871	1	1	0	1	0	0	0	0	0	0	0	0	0	1	1	5	5	0	10
ENSMUSG00000052825	1	0	0	1	1	1	0	0	1	0	0	0	0	0	0	5	5	0	10
ENSMUSG00000052821	0	0	1	1	0	1	0	0	0	0	0	0	0	1	1	5	5	0	10
ENSMUSG00000048922	1	0	0	1	0	-1	0	0	1	1	1	0	0	0	-1	7	5	2	8
ENSMUSG00000021886	1	1	1	1	0	0	0	0	0	0	-1	0	0	0	1	6	5	1	9
ENSMUSG00000050075	1	0	1	1	0	0	0	0	0	1	0	0	0	0	1	5	5	0	10
ENSMUSG00000031838	0	0	1	1	0	0	0	0	1	1	1	0	0	0	0	5	5	0	10
ENSMUSG00000022752	1	0	0	1	0	0	0	0	0	0	1	0	0	1	1	5	5	0	10
ENSMUSG00000034248	0	0	0	1	0	1	0	0	-1	0	1	0	0	1	1	6	5	1	9
ENSMUSG00000052102	0	0	0	1	0	0	0	0	1	1	1	1	0	-1	0	6	5	1	9
ENSMUSG00000025193	1	0	0	1	-1	0	0	0	1	0	0	0	0	1	1	6	5	1	9
ENSMUSG00000045427	1	0	0	1	1	0	0	0	1	0	-1	0	0	1	0	6	5	1	9
ENSMUSG00000112843	1	0	0	1	0	1	0	0	0	0	0	0	0	1	1	5	5	0	10
ENSMUSG00000018848	1	0	0	1	1	1	0	0	-1	0	-1	0	0	1	0	7	5	2	8
ENSMUSG00000030717	0	0	0	1	0	1	0	0	1	0	0	1	0	0	1	5	5	0	10
ENSMUSG00000029063	1	0	0	1	0	0	0	0	1	0	-1	0	0	1	1	6	5	1	9
ENSMUSG00000080242	1	0	0	1	0	1	0	0	1	0	-1	0	0	0	1	6	5	1	9
ENSMUSG00000036469	1	0	0	1	0	1	0	0	0	1	0	0	0	0	1	5	5	0	10
ENSMUSG00000026672	1	0	0	0	0	0	0	1	1	1	1	0	0	0	0	5	5	0	10
ENSMUSG00000030102	-1	0	0	0	0	0	0	0	1	1	1	0	0	1	1	6	5	1	9
ENSMUSG00000026094	1	0	0	0	1	0	0	0	1	1	0	1	0	0	0	5	5	0	10
ENSMUSG00000022771	0	0	0	1	-1	0	0	0	1	-1	1	1	0	0	1	7	5	2	8
ENSMUSG00000026893	1	0	0	1	0	0	0	0	-1	1	0	0	0	1	1	6	5	1	9
ENSMUSG00000021040	1	0	0	0	0	1	0	0	0	1	0	0	0	1	1	5	5	0	10
ENSMUSG00000056608	0	0	0	0	1	0	0	0	1	0	1	1	0	0	1	5	5	0	10
ENSMUSG00000023913	1	1	0	1	0	0	0	0	0	1	0	0	0	0	1	5	5	0	10
ENSMUSG00000046711	1	0	0	1	0	0	0	0	1	0	-1	0	0	1	1	6	5	1	9
ENSMUSG00000021457	1	0	1	1	0	0	0	0	-1	0	1	0	0	-1	1	7	5	2	8
ENSMUSG00000024190	0	0	0	1	-1	-1	0	-1	1	1	-1	1	-1	1	0	10	5	5	5
ENSMUSG00000101751	0	0	0	1	0	0	0	0	-1	1	1	0	0	1	1	6	5	1	9
ENSMUSG00000039616	1	0	0	1	0	0	0	0	1	1	1	0	0	0	0	5	5	0	10
ENSMUSG00000062031	1	0	0	0	0	0	0	0	1	1	1	0	0	1	0	5	5	0	10
ENSMUSG00000025010	0	0	0	1	0	1	0	0	1	0	-1	0	0	1	1	6	5	1	9
ENSMUSG00000087231	0	0	0	1	1	1	0	0	1	0	0	1	0	0	0	5	5	0	10
ENSMUSG00000017499	1	0	0	1	0	0	0	0	0	1	1	1	0	0	-1	6	5	1	9
ENSMUSG00000024300	1	0	1	1	0	-1	0	0	1	0	1	0	0	0	0	6	5	1	9
ENSMUSG00000037313	1	0	0	1	0	0	0	0	1	1	1	0	0	0	-1	6	5	1	9
ENSMUSG00000027306	1	0	0	1	0	0	0	0	1	1	1	0	0	0	-1	6	5	1	9
ENSMUSG00000055447	1	0	0	1	1	0	0	0	0	0	0	0	0	1	1	5	5	0	10
ENSMUSG00000028961	1	0	0	1	0	0	0	0	1	1	0	0	1	0	0	5	5	0	10
ENSMUSG00000112808	1	0	0	1	0	0	0	0	1	1	1	0	0	0	0	5	5	0	10
ENSMUSG00000053541	1	1	0	0	0	0	0	0	0	-1	1	0	0	1	1	6	5	1	9
ENSMUSG00000028214	1	0	0	1	1	0	0	0	1	1	0	0	0	0	0	5	5	0	10
ENSMUSG00000020300	0	0	0	1	1	1	0	0	1	0	0	1	0	0	0	5	5	0	10
ENSMUSG00000078994	1	0	0	1	0	0	0	0	1	0	0	1	0	0	1	5	5	0	10
ENSMUSG00000037126	1	0	0	-1	1	1	0	0	1	1	0	0	0	0	0	6	5	1	9
ENSMUSG00000092006	1	0	0	1	0	0	0	0	1	0	0	0	0	1	1	5	5	0	10
ENSMUSG00000040751	1	0	1	1	0	0	0	0	1	0	1	0	0	0	0	5	5	0	10
ENSMUSG00000039678	1	0	0	1	0	0	0	0	1	0	-1	0	0	1	1	6	5	1	9
ENSMUSG00000030867	1	0	0	1	0	0	0	0	1	1	1	0	0	0	-1	6	5	1	9
ENSMUSG00000097224	1	1	0	1	0	0	0	0	0	0	0	0	0	1	1	5	5	0	10
ENSMUSG00000031402	1	0	0	1	0	0	0	1	-1	0	-1	0	0	1	1	7	5	2	8
ENSMUSG00000005779	1	0	0	1	0	0	0	0	1	1	0	-1	0	1	0	6	5	1	9
ENSMUSG00000052085	0	0	0	1	0	-1	0	0	-1	1	1	0	0	1	1	7	5	2	8
ENSMUSG00000086782	1	0	0	1	1	0	0	0	0	0	0	0	0	1	1	5	5	0	10
ENSMUSG00000024672	1	0	1	1	0	0	0	0	0	0	0	0	0	1	1	5	5	0	10
ENSMUSG00000074506	1	0	0	1	1	0	0	0	1	1	0	0	0	0	0	5	5	0	10
ENSMUSG00000110537	1	0	0	1	1	1	0	0	0	0	1	0	0	0	0	5	5	0	10
ENSMUSG00000027636	1	0	0	1	0	0	0	0	1	0	0	0	0	1	1	5	5	0	10
ENSMUSG00000027637	1	0	0	1	0	0	0	0	1	0	-1	0	0	1	1	6	5	1	9
ENSMUSG00000027326	1	0	1	1	0	0	0	0	0	1	1	0	0	0	-1	6	5	1	9
ENSMUSG00000032487	0	0	0	1	1	0	1	0	1	0	0	1	-1	-1	0	7	5	2	8
ENSMUSG00000027346	0	0	0	0	1	0	0	0	1	0	1	1	0	-1	1	6	5	1	9
ENSMUSG00000085148	1	0	0	0	1	1	0	0	1	1	0	0	0	0	0	5	5	0	10
ENSMUSG00000022661	1	0	0	1	1	0	0	1	1	0	0	0	0	0	0	5	5	0	10
ENSMUSG00000003308	1	0	0	1	0	0	0	0	0	1	0	0	0	1	1	5	5	0	10
ENSMUSG00000047881	0	0	0	1	0	0	0	0	1	0	1	0	0	1	1	5	5	0	10
ENSMUSG00000076928	1	0	1	1	0	0	0	0	1	0	0	0	0	0	0	4	4	0	11
ENSMUSG00000028232	0	0	0	1	1	0	0	0	0	0	0	1	0	0	1	4	4	0	11
ENSMUSG00000064120	1	0	0	1	-1	-1	0	0	1	0	0	0	0	0	1	6	4	2	9
ENSMUSG00000018209	0	0	0	1	-1	0	0	0	1	0	1	0	0	0	1	5	4	1	10
ENSMUSG00000036768	0	0	0	1	-1	0	0	0	1	1	1	0	0	0	-1	6	4	2	9
ENSMUSG00000033684	1	0	0	1	0	0	0	0	-1	1	1	0	0	0	-1	6	4	2	9
ENSMUSG00000030088	0	0	0	1	-1	0	0	0	1	1	0	0	0	1	0	5	4	1	10
ENSMUSG00000041831	1	1	0	1	0	0	0	0	-1	-1	1	0	0	0	0	6	4	2	9
ENSMUSG00000023186	1	0	0	1	-1	0	0	0	-1	1	-1	0	0	0	1	7	4	3	8
ENSMUSG00000030339	1	0	0	1	0	0	1	0	1	0	0	0	0	0	0	4	4	0	11
ENSMUSG00000062070	1	0	0	1	1	0	0	0	-1	1	0	0	0	0	-1	6	4	2	9
ENSMUSG00000029003	1	0	0	1	0	0	0	0	1	0	0	0	0	1	0	4	4	0	11
ENSMUSG00000083863	0	0	0	-1	1	1	0	0	1	0	-1	0	0	1	-1	7	4	3	8
ENSMUSG00000038264	1	1	0	1	0	0	0	0	0	1	0	0	0	0	-1	5	4	1	10
ENSMUSG00000026970	0	0	0	1	0	0	0	0	1	0	1	0	0	1	0	4	4	0	11
ENSMUSG00000086763	1	0	0	0	0	0	0	0	1	0	0	0	0	1	1	4	4	0	11
ENSMUSG00000078812	1	0	0	1	1	0	0	0	1	0	-1	0	0	0	0	5	4	1	10
ENSMUSG00000022876	1	0	0	1	0	1	0	0	0	1	0	0	0	0	0	4	4	0	11
ENSMUSG00000101389	1	1	0	1	0	0	0	0	0	0	-1	0	0	1	0	5	4	1	10
ENSMUSG00000092274	0	0	0	1	0	0	0	0	1	0	1	1	0	0	0	4	4	0	11
ENSMUSG00000096960	0	0	0	1	0	0	0	0	0	0	0	0	1	1	1	4	4	0	11
ENSMUSG00000023048	1	0	0	1	0	0	0	0	-1	1	1	0	0	0	0	5	4	1	10
ENSMUSG00000029616	1	0	0	1	0	0	0	0	1	1	0	0	0	0	0	4	4	0	11
ENSMUSG00000025915	1	0	0	1	0	0	0	0	-1	0	-1	0	0	1	1	6	4	2	9
ENSMUSG00000049932	0	0	0	1	1	0	0	0	-1	1	1	0	0	0	-1	6	4	2	9
ENSMUSG00000068328	0	0	0	1	-1	0	0	0	1	1	0	0	0	0	1	5	4	1	10
ENSMUSG00000020733	1	0	0	1	1	0	0	0	-1	0	1	0	0	0	0	5	4	1	10
ENSMUSG00000033847	1	1	0	1	0	0	0	0	0	0	0	0	0	0	1	4	4	0	11
ENSMUSG00000010406	0	0	0	1	0	1	0	0	1	1	-1	0	-1	0	0	6	4	2	9
ENSMUSG00000032462	-1	0	0	1	0	0	0	0	0	1	1	1	0	0	0	5	4	1	10
ENSMUSG00000109491	0	0	0	1	0	0	0	0	1	1	0	0	0	0	1	4	4	0	11
ENSMUSG00000024730	1	1	0	1	0	0	0	0	1	0	0	0	0	0	0	4	4	0	11
ENSMUSG00000026483	-1	0	0	-1	-1	-1	0	0	1	1	1	1	0	0	0	8	4	4	7
ENSMUSG00000040987	1	0	0	0	0	0	0	0	1	0	0	0	0	1	1	4	4	0	11
ENSMUSG00000038128	1	0	0	0	1	0	0	0	0	1	1	0	0	0	0	4	4	0	11
ENSMUSG00000057406	0	0	0	1	0	0	0	0	1	1	1	0	0	0	0	4	4	0	11
ENSMUSG00000035329	0	0	0	1	1	0	0	0	-1	0	1	1	0	0	0	5	4	1	10
ENSMUSG00000075705	1	0	0	0	0	0	0	0	1	1	0	0	0	0	1	4	4	0	11
ENSMUSG00000043067	1	0	0	0	0	0	0	0	-1	0	1	0	0	1	1	5	4	1	10
ENSMUSG00000066151	0	0	0	1	-1	0	0	0	1	1	1	0	0	0	0	5	4	1	10
ENSMUSG00000057637	0	0	0	1	0	0	0	0	-1	0	1	1	0	-1	1	6	4	2	9
ENSMUSG00000015837	1	0	0	0	1	0	0	0	-1	1	0	0	0	0	1	5	4	1	10
ENSMUSG00000028889	0	0	0	1	1	0	1	0	1	0	-1	0	0	0	0	5	4	1	10
ENSMUSG00000035199	1	0	0	1	1	0	0	0	1	0	0	0	0	0	0	4	4	0	11
ENSMUSG00000021758	1	0	0	1	0	0	0	0	0	0	0	0	0	1	1	4	4	0	11
ENSMUSG00000015451	1	0	0	1	0	0	0	0	0	1	0	0	0	0	1	4	4	0	11
ENSMUSG00000000594	0	0	0	1	0	0	0	0	1	1	1	0	0	0	0	4	4	0	11
ENSMUSG00000024851	1	0	0	1	0	-1	0	0	-1	0	0	0	0	1	1	6	4	2	9
ENSMUSG00000033720	1	0	0	1	0	0	0	0	1	-1	0	0	0	0	1	5	4	1	10
ENSMUSG00000055170	1	1	0	1	0	0	0	0	0	1	0	0	0	0	0	4	4	0	11
ENSMUSG00000055172	1	0	1	1	0	0	0	0	1	0	0	0	0	0	0	4	4	0	11
ENSMUSG00000097099	-1	0	0	1	1	0	0	0	-1	0	0	1	-1	0	1	7	4	3	8
ENSMUSG00000096544	1	0	0	1	1	1	0	0	-1	0	-1	0	0	0	0	6	4	2	9
ENSMUSG00000113800	0	0	0	1	1	1	0	0	0	0	0	0	0	0	1	4	4	0	11
ENSMUSG00000031762	1	1	0	1	0	0	0	0	-1	0	1	0	0	-1	-1	7	4	3	8
ENSMUSG00000031765	1	1	0	1	0	0	0	0	-1	0	1	0	-1	-1	-1	8	4	4	7
ENSMUSG00000026011	1	0	1	1	0	0	0	0	0	1	0	0	0	0	0	4	4	0	11
ENSMUSG00000063889	1	0	0	1	1	0	0	0	0	1	-1	0	0	0	0	5	4	1	10
ENSMUSG00000020385	0	0	0	0	1	0	0	0	1	0	1	1	0	0	0	4	4	0	11
ENSMUSG00000002055	1	0	0	1	0	0	0	0	-1	1	1	0	0	0	-1	6	4	2	9
ENSMUSG00000072889	0	0	0	1	0	0	0	0	0	0	1	0	0	1	1	4	4	0	11
ENSMUSG00000052253	0	0	0	0	1	0	0	0	1	1	0	1	0	0	0	4	4	0	11
ENSMUSG00000092417	1	0	0	1	0	0	0	0	1	0	0	0	0	0	1	4	4	0	11
ENSMUSG00000061100	1	1	0	-1	1	0	0	0	1	0	0	0	0	0	0	5	4	1	10
ENSMUSG00000029007	1	0	0	1	-1	0	0	0	1	0	1	0	0	0	0	5	4	1	10
ENSMUSG00000027007	0	0	0	0	0	0	0	0	1	1	1	0	0	0	1	4	4	0	11
ENSMUSG00000031390	1	0	0	1	0	0	0	0	0	0	1	0	0	0	1	4	4	0	11
ENSMUSG00000020564	1	0	0	1	0	0	0	0	-1	0	1	0	0	0	1	5	4	1	10
ENSMUSG00000017765	0	0	0	1	0	0	0	0	1	1	0	1	0	0	0	4	4	0	11
ENSMUSG00000024387	0	0	0	1	0	0	0	0	1	1	1	0	0	0	0	4	4	0	11
ENSMUSG00000061024	1	0	0	1	1	1	0	0	-1	0	0	0	0	0	0	5	4	1	10
ENSMUSG00000030619	0	0	0	1	1	0	0	0	-1	0	0	1	0	0	1	5	4	1	10
ENSMUSG00000070691	1	0	0	1	0	0	0	0	1	0	1	0	0	0	0	4	4	0	11
ENSMUSG00000096433	0	0	0	1	0	0	0	0	1	0	1	0	0	0	1	4	4	0	11
ENSMUSG00000055110	1	0	0	1	0	0	0	1	0	0	0	0	0	0	1	4	4	0	11
ENSMUSG00000090307	1	1	0	1	0	0	0	0	0	0	0	0	0	0	1	4	4	0	11
ENSMUSG00000037465	0	0	0	0	1	0	1	0	-1	0	-1	1	0	1	0	6	4	2	9
ENSMUSG00000031709	1	0	0	1	0	0	0	0	-1	1	0	0	0	-1	1	6	4	2	9
ENSMUSG00000031701	0	0	0	0	1	1	0	1	-1	0	0	0	0	1	0	5	4	1	10
ENSMUSG00000003458	1	0	0	1	0	0	0	0	1	0	-1	1	0	0	0	5	4	1	10
ENSMUSG00000036931	1	0	0	1	1	0	0	0	1	-1	0	0	0	0	0	5	4	1	10
ENSMUSG00000020205	0	0	0	0	1	0	1	0	1	0	0	1	0	0	-1	5	4	1	10
ENSMUSG00000022602	1	0	0	1	1	1	0	0	-1	0	0	0	-1	0	0	6	4	2	9
ENSMUSG00000076036	1	0	0	1	1	0	0	0	-1	1	-1	0	0	0	0	6	4	2	9
ENSMUSG00000006010	0	0	0	0	0	0	0	0	1	0	1	1	0	0	1	4	4	0	11
ENSMUSG00000022952	0	0	0	1	1	0	0	0	-1	0	1	1	0	0	0	5	4	1	10
ENSMUSG00000062753	1	0	0	1	0	0	0	0	1	0	0	0	0	0	1	4	4	0	11
ENSMUSG00000058099	1	0	1	1	0	-1	0	0	1	0	0	0	0	0	0	5	4	1	10
ENSMUSG00000049303	1	0	0	1	1	0	0	0	1	0	0	0	0	0	0	4	4	0	11
ENSMUSG00000003847	-1	0	0	1	0	0	0	0	1	0	1	1	0	-1	0	6	4	2	9
ENSMUSG00000018916	1	0	0	0	1	0	0	0	1	1	-1	0	0	0	0	5	4	1	10
ENSMUSG00000026196	1	0	0	1	0	0	0	0	0	1	1	0	0	0	0	4	4	0	11
ENSMUSG00000040940	1	0	0	1	-1	-1	0	0	1	0	1	0	0	0	0	6	4	2	9
ENSMUSG00000022034	0	0	0	1	0	0	0	0	0	1	1	1	0	0	-1	5	4	1	10
ENSMUSG00000022033	0	0	1	1	0	0	0	0	1	0	1	0	0	0	-1	5	4	1	10
ENSMUSG00000057982	0	0	0	1	0	0	0	0	1	-1	1	1	0	0	0	5	4	1	10
ENSMUSG00000029465	1	0	0	1	0	0	0	0	1	1	0	0	0	0	0	4	4	0	11
ENSMUSG00000039157	1	0	0	0	1	-1	0	0	-1	1	-1	0	0	0	1	7	4	3	8
ENSMUSG00000025746	1	0	0	1	1	0	0	1	0	0	0	0	0	0	0	4	4	0	11
ENSMUSG00000016520	0	0	0	0	1	0	1	0	1	0	1	0	0	0	0	4	4	0	11
ENSMUSG00000032094	1	0	1	1	0	0	0	0	0	1	0	0	0	0	0	4	4	0	11
ENSMUSG00000032093	1	0	1	1	0	0	0	0	0	1	0	0	0	0	0	4	4	0	11
ENSMUSG00000035725	0	0	0	1	1	0	0	0	-1	0	0	0	0	1	1	5	4	1	10
ENSMUSG00000020100	1	0	0	1	-1	0	0	0	0	0	-1	0	0	1	1	6	4	2	9
ENSMUSG00000036138	1	0	0	1	-1	0	0	0	1	0	0	0	0	1	0	5	4	1	10
ENSMUSG00000020108	1	0	0	1	1	0	0	0	-1	0	-1	1	-1	0	-1	8	4	4	7
ENSMUSG00000039841	1	0	0	1	0	0	0	0	0	0	0	0	0	1	1	4	4	0	11
ENSMUSG00000041846	0	0	0	1	1	0	0	0	1	0	1	0	0	0	0	4	4	0	11
ENSMUSG00000111339	0	0	0	1	0	0	0	0	1	0	0	0	0	1	1	4	4	0	11
ENSMUSG00000096459	1	0	0	0	0	0	0	0	1	1	1	0	0	0	0	4	4	0	11
ENSMUSG00000037440	1	1	0	1	0	0	0	0	1	0	0	0	0	0	0	4	4	0	11
ENSMUSG00000027901	1	0	0	1	-1	0	0	0	1	1	-1	0	0	0	0	6	4	2	9
ENSMUSG00000027907	1	0	0	1	0	0	0	0	-1	1	1	-1	0	0	-1	7	4	3	8
ENSMUSG00000031540	0	0	0	1	0	0	0	0	-1	0	1	0	0	1	1	5	4	1	10
ENSMUSG00000015377	1	0	0	1	0	0	0	0	1	0	0	0	0	0	1	4	4	0	11
ENSMUSG00000031722	1	0	0	1	0	0	0	0	1	1	0	0	0	0	0	4	4	0	11
ENSMUSG00000031729	1	0	0	1	0	0	0	0	-1	0	-1	0	0	1	1	6	4	2	9
ENSMUSG00000038147	1	0	1	1	0	-1	0	0	1	-1	0	0	0	0	0	6	4	2	9
ENSMUSG00000032407	0	0	0	0	0	0	0	0	1	0	1	1	0	0	1	4	4	0	11
ENSMUSG00000065911	0	0	1	1	0	1	0	0	0	-1	0	0	1	0	0	5	4	1	10
ENSMUSG00000022971	1	0	0	1	0	0	0	0	1	-1	-1	0	0	0	1	6	4	2	9
ENSMUSG00000049323	1	0	0	1	0	0	0	-1	1	0	0	0	0	0	1	5	4	1	10
ENSMUSG00000104303	1	1	0	1	0	0	0	0	0	1	0	0	0	0	0	4	4	0	11
ENSMUSG00000029192	1	0	0	1	-1	0	0	0	1	1	0	0	0	-1	0	6	4	2	9
ENSMUSG00000078546	0	0	0	0	0	0	0	0	1	0	1	1	0	0	1	4	4	0	11
ENSMUSG00000017861	1	0	0	1	0	0	0	0	0	1	1	0	0	0	-1	5	4	1	10
ENSMUSG00000042535	1	0	0	0	0	0	0	0	1	0	0	0	0	1	1	4	4	0	11
ENSMUSG00000033967	1	0	0	1	0	0	1	0	1	0	0	0	0	0	0	4	4	0	11
ENSMUSG00000020023	-1	0	0	1	0	0	0	0	-1	1	0	0	0	1	1	6	4	2	9
ENSMUSG00000021998	1	0	0	1	0	0	0	0	1	0	1	0	0	0	0	4	4	0	11
ENSMUSG00000021990	1	0	0	1	0	1	0	0	-1	0	0	0	0	1	0	5	4	1	10
ENSMUSG00000001482	0	0	0	-1	-1	-1	0	0	1	1	1	0	0	0	1	7	4	3	8
ENSMUSG00000027699	0	0	0	1	0	0	0	0	1	1	1	0	0	0	-1	5	4	1	10
ENSMUSG00000027695	0	0	0	0	1	0	0	0	1	0	1	1	0	0	0	4	4	0	11
ENSMUSG00000038188	0	0	0	1	0	0	0	0	1	0	0	0	0	1	1	4	4	0	11
ENSMUSG00000090946	0	0	0	1	0	1	0	0	1	0	0	0	0	0	1	4	4	0	11
ENSMUSG00000037601	1	0	0	1	1	0	0	0	1	0	-1	-1	0	0	-1	7	4	3	8
ENSMUSG00000024927	1	0	0	1	0	0	0	0	1	0	-1	1	-1	0	0	6	4	2	9
ENSMUSG00000023224	1	0	0	1	1	0	1	0	0	0	0	0	0	0	0	4	4	0	11
ENSMUSG00000005103	1	0	0	1	1	0	0	0	1	0	0	0	0	0	0	4	4	0	11
ENSMUSG00000007476	1	0	0	1	0	0	0	0	1	0	1	0	-1	-1	0	6	4	2	9
ENSMUSG00000015355	1	0	1	1	0	0	0	0	0	0	1	0	0	0	0	4	4	0	11
ENSMUSG00000078974	0	0	0	1	0	0	0	0	1	1	-1	-1	0	1	0	6	4	2	9
ENSMUSG00000098470	1	0	1	1	0	0	0	0	1	0	0	0	0	0	0	4	4	0	11
ENSMUSG00000051306	1	0	0	1	1	0	0	0	0	0	0	0	0	0	1	4	4	0	11
ENSMUSG00000062300	0	0	0	1	0	1	1	0	1	0	0	0	0	0	0	4	4	0	11
ENSMUSG00000022175	1	0	0	1	0	0	0	0	1	0	0	0	-1	1	0	5	4	1	10
ENSMUSG00000047067	1	0	0	1	0	0	0	0	0	-1	0	0	0	1	1	5	4	1	10
ENSMUSG00000047281	1	0	0	-1	1	1	1	0	-1	0	0	0	0	0	0	6	4	2	9
ENSMUSG00000111394	1	0	0	1	0	0	0	0	1	1	0	0	0	0	0	4	4	0	11
ENSMUSG00000114196	0	0	0	-1	0	1	0	0	1	1	0	0	0	1	0	5	4	1	10
ENSMUSG00000032178	0	0	0	1	0	0	0	0	1	0	1	1	0	0	0	4	4	0	11
ENSMUSG00000041506	1	0	0	1	1	0	1	0	-1	-1	-1	0	0	0	0	7	4	3	8
ENSMUSG00000040488	-1	0	0	-1	0	1	0	0	1	0	1	1	0	0	0	6	4	2	9
ENSMUSG00000020922	1	0	0	1	1	0	0	0	1	0	0	0	0	0	0	4	4	0	11
ENSMUSG00000071660	1	0	0	1	0	0	0	0	-1	0	1	0	0	0	1	5	4	1	10
ENSMUSG00000040010	1	0	0	1	1	0	0	0	1	0	-1	-1	0	0	0	6	4	2	9
ENSMUSG00000070953	1	0	0	0	1	1	0	0	0	1	0	0	0	0	0	4	4	0	11
ENSMUSG00000028800	1	0	0	1	0	0	0	0	-1	0	1	0	0	1	0	5	4	1	10
ENSMUSG00000047547	1	0	0	1	1	0	0	0	1	0	-1	0	0	0	-1	6	4	2	9
ENSMUSG00000053317	1	0	0	1	0	0	0	0	1	1	0	0	0	0	0	4	4	0	11
ENSMUSG00000035505	1	0	0	1	0	0	0	0	-1	0	-1	0	0	1	1	6	4	2	9
ENSMUSG00000022247	0	0	0	1	1	1	0	0	0	0	-1	1	0	0	0	5	4	1	10
ENSMUSG00000018381	1	0	0	0	0	0	0	0	1	1	-1	0	0	0	1	5	4	1	10
ENSMUSG00000020143	1	0	1	1	0	-1	0	0	0	0	1	0	0	0	0	5	4	1	10
ENSMUSG00000018567	1	0	0	1	0	0	0	0	1	1	-1	0	-1	0	0	6	4	2	9
ENSMUSG00000001131	1	1	1	1	0	0	0	0	0	0	0	-1	0	0	0	5	4	1	10
ENSMUSG00000056962	0	0	0	1	1	1	0	0	-1	-1	1	0	-1	0	0	7	4	3	8
ENSMUSG00000024498	1	0	0	1	0	0	0	0	1	0	1	0	0	0	0	4	4	0	11
ENSMUSG00000037628	0	0	0	1	0	0	0	0	1	1	1	0	0	0	-1	5	4	1	10
ENSMUSG00000040247	1	0	1	1	0	0	0	0	-1	-1	1	0	0	0	0	6	4	2	9
ENSMUSG00000000409	1	0	1	1	0	1	0	0	0	0	-1	0	0	0	0	5	4	1	10
ENSMUSG00000031506	1	0	1	1	0	-1	0	0	0	-1	1	0	0	-1	0	7	4	3	8
ENSMUSG00000022150	0	0	0	1	0	1	1	-1	1	0	0	0	0	0	-1	6	4	2	9
ENSMUSG00000036995	1	1	0	1	0	0	0	0	1	0	0	0	0	0	0	4	4	0	11
ENSMUSG00000029816	1	0	0	0	0	0	0	0	1	1	1	0	0	0	0	4	4	0	11
ENSMUSG00000034595	1	0	0	1	1	0	0	0	1	0	0	0	-1	0	0	5	4	1	10
ENSMUSG00000048621	1	1	0	1	0	0	0	0	0	0	0	0	0	0	1	4	4	0	11
ENSMUSG00000083076	-1	0	0	-1	1	1	0	0	1	-1	-1	0	0	1	-1	9	4	5	6
ENSMUSG00000025314	0	0	0	1	0	0	0	0	-1	1	1	0	0	0	1	5	4	1	10
ENSMUSG00000024491	0	0	0	1	0	0	0	0	0	0	1	1	0	0	1	4	4	0	11
ENSMUSG00000068744	1	0	0	1	0	0	0	0	1	0	1	0	0	0	0	4	4	0	11
ENSMUSG00000036053	1	0	0	1	0	0	0	0	1	1	0	0	0	0	0	4	4	0	11
ENSMUSG00000030047	1	0	0	1	0	0	0	0	1	0	1	0	0	0	0	4	4	0	11
ENSMUSG00000031311	0	0	0	0	0	1	0	0	1	0	1	0	0	1	0	4	4	0	11
ENSMUSG00000039187	1	0	0	1	0	0	0	0	1	0	1	0	0	0	-1	5	4	1	10
ENSMUSG00000007041	1	0	0	1	0	0	0	0	-1	1	1	0	-1	0	0	6	4	2	9
ENSMUSG00000025810	-1	0	0	0	-1	-1	0	0	1	1	1	0	0	1	0	7	4	3	8
ENSMUSG00000029379	1	0	0	1	1	1	0	0	0	0	0	0	0	0	0	4	4	0	11
ENSMUSG00000029371	1	0	0	1	1	0	1	0	-1	0	0	0	0	0	0	5	4	1	10
ENSMUSG00000110657	0	0	0	0	1	1	0	0	0	0	0	0	0	1	1	4	4	0	11
ENSMUSG00000036833	1	0	0	1	0	-1	0	0	1	1	0	0	0	0	0	5	4	1	10
ENSMUSG00000087141	1	0	0	1	1	0	0	0	0	0	0	1	0	-1	0	5	4	1	10
ENSMUSG00000010277	0	0	0	1	-1	0	0	0	1	1	1	0	0	0	0	5	4	1	10
ENSMUSG00000032035	0	0	0	1	1	0	1	0	-1	0	0	1	0	-1	-1	7	4	3	8
ENSMUSG00000001444	1	0	1	1	0	0	0	0	0	-1	1	0	0	0	0	5	4	1	10
ENSMUSG00000021485	0	0	0	1	0	0	0	0	1	1	1	0	0	0	0	4	4	0	11
ENSMUSG00000079019	0	0	0	1	0	0	0	0	1	1	1	0	0	0	0	4	4	0	11
ENSMUSG00000090216	1	0	0	0	0	1	0	0	0	0	0	0	0	1	1	4	4	0	11
ENSMUSG00000034574	0	0	0	1	0	0	0	0	1	0	1	0	0	1	0	4	4	0	11
ENSMUSG00000062082	1	0	0	1	0	0	0	0	0	0	1	0	0	0	1	4	4	0	11
ENSMUSG00000046591	1	0	0	1	0	0	0	0	0	1	1	0	0	0	-1	5	4	1	10
ENSMUSG00000021569	1	0	1	1	0	0	0	0	0	0	1	0	0	0	-1	5	4	1	10
ENSMUSG00000044197	1	0	0	1	-1	0	0	0	1	1	0	0	0	-1	0	6	4	2	9
ENSMUSG00000058761	1	0	0	1	0	-1	0	0	-1	0	0	1	0	0	1	6	4	2	9
ENSMUSG00000027248	1	0	0	1	1	0	0	0	-1	1	0	0	0	0	0	5	4	1	10
ENSMUSG00000027533	1	0	0	0	-1	0	0	0	1	1	1	0	0	0	0	5	4	1	10
ENSMUSG00000030064	0	0	0	1	1	0	0	0	-1	0	-1	0	0	1	1	6	4	2	9
ENSMUSG00000026116	1	0	0	1	-1	-1	0	0	-1	0	1	1	0	0	0	7	4	3	8
ENSMUSG00000026110	1	0	0	0	0	1	0	0	-1	0	-1	0	0	1	1	6	4	2	9
ENSMUSG00000051864	0	0	0	1	-1	0	0	0	1	1	1	0	0	0	0	5	4	1	10
ENSMUSG00000007029	1	0	0	1	0	0	0	0	1	0	-1	0	0	1	0	5	4	1	10
ENSMUSG00000047036	0	0	0	0	0	0	0	0	1	0	1	1	0	0	1	4	4	0	11
ENSMUSG00000029174	1	0	0	1	0	0	0	0	-1	1	1	0	0	0	0	5	4	1	10
ENSMUSG00000049744	1	0	0	1	0	0	0	0	0	0	1	0	0	0	1	4	4	0	11
ENSMUSG00000020185	1	0	0	1	0	0	0	0	-1	1	1	0	0	0	-1	6	4	2	9
ENSMUSG00000006304	1	0	0	1	1	0	0	0	1	0	0	0	0	0	0	4	4	0	11
ENSMUSG00000042333	1	0	0	1	0	0	0	0	1	0	0	0	0	0	1	4	4	0	11
ENSMUSG00000029490	1	0	0	1	0	0	0	0	0	0	0	0	0	1	1	4	4	0	11
ENSMUSG00000032011	1	0	0	1	0	0	0	0	0	1	1	0	-1	0	0	5	4	1	10
ENSMUSG00000024456	0	0	0	1	-1	0	0	0	1	0	1	1	0	0	0	5	4	1	10
ENSMUSG00000021975	0	0	0	1	0	0	0	0	1	0	0	0	0	1	1	4	4	0	11
ENSMUSG00000002847	1	1	1	1	0	0	0	0	0	0	0	0	0	0	0	4	4	0	11
ENSMUSG00000024981	0	0	0	1	0	0	0	0	1	1	1	0	0	0	0	4	4	0	11
ENSMUSG00000049103	1	0	1	1	0	0	0	0	0	0	0	0	0	0	1	4	4	0	11
ENSMUSG00000049109	1	0	1	1	0	0	0	0	0	1	0	0	0	0	0	4	4	0	11
ENSMUSG00000030427	1	0	1	1	0	0	0	0	0	0	0	0	0	0	1	4	4	0	11
ENSMUSG00000026584	0	0	0	1	0	0	0	0	1	0	1	1	0	0	0	4	4	0	11
ENSMUSG00000026581	1	1	0	1	0	0	0	0	0	-1	-1	0	0	0	1	6	4	2	9
ENSMUSG00000022114	0	0	0	0	1	0	0	0	1	1	0	0	0	1	0	4	4	0	11
ENSMUSG00000000915	0	0	0	1	-1	0	0	0	1	1	1	0	0	0	0	5	4	1	10
ENSMUSG00000051413	1	0	0	1	0	0	0	0	-1	0	1	0	0	0	1	5	4	1	10
ENSMUSG00000031101	1	0	1	1	0	0	0	0	1	0	0	0	0	0	0	4	4	0	11
ENSMUSG00000021116	1	0	0	1	1	1	0	0	-1	0	0	0	0	0	0	5	4	1	10
ENSMUSG00000065037	0	0	1	1	0	1	0	0	0	-1	0	0	1	0	0	5	4	1	10
ENSMUSG00000009293	0	0	0	0	1	-1	0	0	1	-1	1	1	0	0	0	6	4	2	9
ENSMUSG00000068250	0	0	0	1	1	1	0	0	-1	-1	0	0	0	0	1	6	4	2	9
ENSMUSG00000020647	0	0	0	0	0	0	0	0	1	0	1	0	0	1	1	4	4	0	11
ENSMUSG00000020644	0	0	0	1	0	1	0	0	1	0	-1	1	-1	0	0	6	4	2	9
ENSMUSG00000026558	0	0	0	1	1	0	0	0	1	0	1	-1	0	-1	-1	7	4	3	8
ENSMUSG00000022070	0	0	0	1	0	0	0	0	1	0	1	1	0	0	-1	5	4	1	10
ENSMUSG00000058290	0	0	0	1	0	0	0	0	1	1	1	0	0	0	-1	5	4	1	10
ENSMUSG00000001632	1	0	0	1	0	0	0	0	0	0	1	1	0	0	0	4	4	0	11
ENSMUSG00000001630	0	0	0	1	0	0	0	0	0	0	0	1	0	1	1	4	4	0	11
ENSMUSG00000010755	1	0	0	1	1	0	0	0	-1	-1	0	0	0	1	0	6	4	2	9
ENSMUSG00000050737	1	0	0	0	1	1	0	0	1	0	0	0	0	0	0	4	4	0	11
ENSMUSG00000026950	1	0	0	-1	0	0	0	0	0	1	1	0	0	0	1	5	4	1	10
ENSMUSG00000026177	1	0	0	1	0	0	0	0	0	0	1	0	0	0	1	4	4	0	11
ENSMUSG00000015133	0	0	0	1	-1	0	0	0	1	0	1	0	0	0	1	5	4	1	10
ENSMUSG00000057963	1	0	0	-1	-1	0	0	0	-1	1	0	0	0	1	1	7	4	3	8
ENSMUSG00000095547	0	0	0	0	0	0	0	0	1	1	0	1	1	0	0	4	4	0	11
ENSMUSG00000001403	1	0	0	-1	0	0	0	0	1	1	1	-1	0	0	-1	7	4	3	8
ENSMUSG00000050212	0	0	0	-1	-1	-1	0	0	1	1	1	-1	-1	0	1	9	4	5	6
ENSMUSG00000059866	1	0	0	1	0	0	0	0	1	1	0	0	0	0	0	4	4	0	11
ENSMUSG00000015839	0	0	0	1	1	1	0	0	0	0	-1	0	0	0	1	5	4	1	10
ENSMUSG00000046808	0	0	0	1	1	0	0	0	1	-1	1	0	0	0	0	5	4	1	10
ENSMUSG00000032294	1	0	0	1	0	0	0	0	1	1	0	0	0	0	0	4	4	0	11
ENSMUSG00000039623	1	0	0	1	0	-1	0	0	1	0	1	0	0	0	0	5	4	1	10
ENSMUSG00000020395	1	0	0	1	0	0	0	0	0	1	1	0	0	0	0	4	4	0	11
ENSMUSG00000031530	0	0	0	0	1	0	0	0	1	1	0	1	0	0	0	4	4	0	11
ENSMUSG00000080717	1	0	0	1	0	0	0	0	0	0	0	0	0	1	1	4	4	0	11
ENSMUSG00000046806	1	0	0	1	0	0	0	0	-1	0	0	0	0	1	1	5	4	1	10
ENSMUSG00000074482	1	0	0	1	0	0	0	0	0	0	0	0	0	1	1	4	4	0	11
ENSMUSG00000039217	1	0	0	1	0	0	0	0	-1	0	0	0	0	1	1	5	4	1	10
ENSMUSG00000042423	1	0	0	1	0	0	0	0	-1	0	1	0	0	0	1	5	4	1	10
ENSMUSG00000021243	1	0	0	1	0	0	0	0	1	0	0	0	0	0	1	4	4	0	11
ENSMUSG00000028071	1	0	1	1	0	0	0	0	0	1	0	0	0	0	0	4	4	0	11
ENSMUSG00000035455	1	0	0	1	0	0	0	0	0	1	1	0	0	0	-1	5	4	1	10
ENSMUSG00000019868	1	0	0	1	0	0	0	0	-1	0	0	0	0	1	1	5	4	1	10
ENSMUSG00000017428	1	0	0	1	0	0	0	0	1	0	0	0	1	0	0	4	4	0	11
ENSMUSG00000058729	1	0	0	1	0	0	0	0	1	0	0	1	0	0	0	4	4	0	11
ENSMUSG00000008036	1	0	0	1	0	0	0	0	1	0	1	0	0	0	0	4	4	0	11
ENSMUSG00000099871	1	0	0	1	0	0	0	0	0	0	0	0	0	1	1	4	4	0	11
ENSMUSG00000024371	1	0	0	1	0	0	0	0	1	0	0	0	0	0	1	4	4	0	11
ENSMUSG00000074874	1	0	0	1	0	0	0	0	0	0	0	0	0	1	1	4	4	0	11
ENSMUSG00000071379	1	0	0	1	0	0	0	1	1	0	-1	0	0	0	0	5	4	1	10
ENSMUSG00000031803	1	0	0	1	0	-1	1	0	-1	1	0	0	0	0	0	6	4	2	9
ENSMUSG00000029135	1	0	0	1	1	0	0	0	-1	1	-1	0	0	-1	-1	8	4	4	7
ENSMUSG00000029131	1	0	0	0	1	0	0	0	-1	0	0	0	0	1	1	5	4	1	10
ENSMUSG00000048787	1	0	0	1	0	1	0	0	-1	0	0	1	0	0	0	5	4	1	10
ENSMUSG00000006736	1	0	0	1	0	0	0	0	-1	1	1	0	0	0	0	5	4	1	10
ENSMUSG00000107846	1	0	0	1	0	0	0	0	-1	1	0	0	0	0	1	5	4	1	10
ENSMUSG00000006344	1	1	0	1	0	0	0	0	1	0	0	0	0	0	-1	5	4	1	10
ENSMUSG00000025161	1	0	0	1	0	0	0	0	-1	1	1	0	0	0	-1	6	4	2	9
ENSMUSG00000002205	0	0	0	1	0	0	0	0	1	0	1	0	0	0	1	4	4	0	11
ENSMUSG00000024140	-1	0	0	-1	0	1	0	0	1	1	1	0	0	0	-1	7	4	3	8
ENSMUSG00000108732	1	0	0	1	0	0	0	0	0	-1	-1	0	0	1	1	6	4	2	9
ENSMUSG00000048897	0	0	0	1	0	-1	0	0	1	1	0	0	0	0	1	5	4	1	10
ENSMUSG00000000486	1	0	1	1	0	0	0	0	1	0	-1	0	0	0	0	5	4	1	10
ENSMUSG00000038510	1	0	0	1	1	0	0	0	-1	0	0	0	0	1	0	5	4	1	10
ENSMUSG00000038517	1	0	0	1	0	0	0	0	1	0	1	0	0	0	0	4	4	0	11
ENSMUSG00000030760	0	0	0	1	0	0	0	0	1	0	0	0	0	1	1	4	4	0	11
ENSMUSG00000027496	1	0	0	1	0	0	0	0	1	0	1	0	0	0	-1	5	4	1	10
ENSMUSG00000041773	1	0	0	1	1	0	0	0	1	-1	-1	0	0	-1	0	7	4	3	8
ENSMUSG00000055024	0	0	0	1	0	0	0	0	-1	0	1	1	0	0	1	5	4	1	10
ENSMUSG00000025429	1	0	0	1	0	0	0	0	-1	0	0	0	0	1	1	5	4	1	10
ENSMUSG00000026683	0	0	0	1	0	-1	0	0	1	1	1	0	0	0	-1	6	4	2	9
ENSMUSG00000038400	0	0	0	-1	1	1	0	0	-1	1	0	0	0	1	0	6	4	2	9
ENSMUSG00000042292	1	0	0	0	0	-1	0	0	1	0	1	0	0	0	1	5	4	1	10
ENSMUSG00000035021	1	0	0	1	1	0	0	0	-1	0	1	0	0	0	0	5	4	1	10
ENSMUSG00000024097	0	0	0	1	1	1	0	0	-1	0	0	0	0	1	0	5	4	1	10
ENSMUSG00000064215	-1	0	0	-1	1	0	1	0	1	1	-1	0	0	0	-1	8	4	4	7
ENSMUSG00000037270	0	0	0	0	0	0	0	0	1	0	1	0	0	1	1	4	4	0	11
ENSMUSG00000020271	0	0	0	1	1	0	0	0	1	0	0	0	0	1	0	4	4	0	11
ENSMUSG00000037725	0	0	0	1	0	0	0	0	1	1	1	0	0	0	-1	5	4	1	10
ENSMUSG00000096887	0	0	0	1	0	1	0	0	1	0	0	0	1	0	0	4	4	0	11
ENSMUSG00000071172	0	0	0	1	1	1	0	0	-1	0	-1	0	0	1	0	6	4	2	9
ENSMUSG00000113149	1	0	0	1	0	0	0	0	1	1	0	0	0	0	0	4	4	0	11
ENSMUSG00000015176	0	0	0	1	1	1	0	0	1	0	-1	-1	0	0	0	6	4	2	9
ENSMUSG00000027808	0	0	0	1	0	0	0	0	1	1	-1	0	0	0	1	5	4	1	10
ENSMUSG00000061878	1	0	0	1	0	1	0	0	1	0	0	0	0	0	0	4	4	0	11
ENSMUSG00000004626	0	0	0	1	-1	0	0	0	1	0	1	0	0	0	1	5	4	1	10
ENSMUSG00000074272	1	0	0	1	1	0	0	0	1	0	0	0	0	0	0	4	4	0	11
ENSMUSG00000094017	1	0	0	1	0	0	0	0	1	0	1	0	0	0	0	4	4	0	11
ENSMUSG00000026864	0	0	0	1	1	0	0	0	-1	0	-1	1	-1	1	0	7	4	3	8
ENSMUSG00000102349	0	0	0	1	0	1	0	0	1	0	0	1	0	0	0	4	4	0	11
ENSMUSG00000082154	0	0	0	1	1	0	0	0	0	1	0	0	0	1	0	4	4	0	11
ENSMUSG00000042688	0	0	0	1	1	0	0	0	-1	1	1	0	0	0	0	5	4	1	10
ENSMUSG00000025981	1	0	0	0	1	0	0	0	0	0	0	1	0	1	0	4	4	0	11
ENSMUSG00000017146	1	0	0	1	0	0	0	0	-1	1	1	0	0	0	0	5	4	1	10
ENSMUSG00000019987	1	1	0	1	0	0	0	0	1	0	0	0	0	0	0	4	4	0	11
ENSMUSG00000078945	1	0	1	1	0	0	0	0	-1	0	0	0	0	0	1	5	4	1	10
ENSMUSG00000042331	-1	0	0	0	0	-1	1	0	1	1	1	0	0	0	0	6	4	2	9
ENSMUSG00000070780	0	0	0	1	0	0	0	0	1	1	1	0	0	0	0	4	4	0	11
ENSMUSG00000030830	1	0	1	1	0	0	0	0	-1	0	-1	-1	0	0	1	7	4	3	8
ENSMUSG00000037280	1	0	1	1	0	-1	0	0	-1	0	1	0	0	-1	0	7	4	3	8
ENSMUSG00000026479	0	0	0	1	1	0	0	0	1	0	0	1	0	0	0	4	4	0	11
ENSMUSG00000073144	0	0	0	1	1	1	0	0	0	0	0	0	0	0	1	4	4	0	11
ENSMUSG00000028175	0	0	1	1	0	0	0	0	0	1	1	0	0	0	-1	5	4	1	10
ENSMUSG00000037913	1	0	0	1	0	0	0	0	0	0	1	0	0	0	1	4	4	0	11
ENSMUSG00000055612	1	0	0	-1	0	0	0	0	1	1	0	1	0	0	-1	6	4	2	9
ENSMUSG00000026663	0	0	0	1	0	0	0	0	-1	1	1	1	0	0	0	5	4	1	10
ENSMUSG00000026083	0	0	0	1	0	0	0	0	1	0	1	1	0	0	0	4	4	0	11
ENSMUSG00000026889	0	0	0	0	1	1	0	0	1	0	0	1	0	0	0	4	4	0	11
ENSMUSG00000029687	0	0	0	1	0	0	0	0	1	1	1	0	0	0	0	4	4	0	11
ENSMUSG00000030091	0	0	1	1	0	-1	0	0	1	0	1	0	0	0	-1	6	4	2	9
ENSMUSG00000047417	1	0	0	1	0	0	0	0	1	0	1	0	0	0	0	4	4	0	11
ENSMUSG00000037887	0	0	0	0	1	1	0	0	1	0	0	1	0	0	0	4	4	0	11
ENSMUSG00000038722	1	0	0	1	0	0	0	0	1	1	0	0	0	0	0	4	4	0	11
ENSMUSG00000086922	1	0	0	1	1	0	0	0	-1	0	-1	0	0	1	0	6	4	2	9
ENSMUSG00000097275	1	0	0	1	0	0	0	0	1	0	0	0	0	0	1	4	4	0	11
ENSMUSG00000041859	1	0	1	1	0	0	0	0	1	0	0	0	0	0	-1	5	4	1	10
ENSMUSG00000001020	1	0	0	1	0	0	0	0	0	1	1	0	-1	0	-1	6	4	2	9
ENSMUSG00000030726	1	0	0	1	0	0	0	0	-1	0	0	1	0	0	1	5	4	1	10
ENSMUSG00000026271	1	1	0	1	0	0	0	0	0	0	0	0	0	0	1	4	4	0	11
ENSMUSG00000021262	1	0	0	1	0	0	0	0	1	0	-1	0	0	1	0	5	4	1	10
ENSMUSG00000022089	1	0	0	1	0	-1	0	0	-1	0	1	0	0	0	1	6	4	2	9
ENSMUSG00000074794	-1	0	0	0	0	0	1	0	0	1	-1	1	0	-1	1	7	4	3	8
ENSMUSG00000021190	1	0	0	1	0	0	0	0	1	1	0	0	0	0	0	4	4	0	11
ENSMUSG00000049608	1	0	0	1	0	0	0	0	0	1	-1	-1	0	0	1	6	4	2	9
ENSMUSG00000021950	1	0	0	1	0	0	0	0	-1	1	1	0	0	0	0	5	4	1	10
ENSMUSG00000032254	0	0	0	1	1	-1	0	0	0	1	1	0	0	0	-1	6	4	2	9
ENSMUSG00000032253	0	0	0	1	0	0	0	0	0	0	1	0	0	1	1	4	4	0	11
ENSMUSG00000028016	0	0	0	1	0	0	0	0	0	0	1	1	0	0	1	4	4	0	11
ENSMUSG00000008475	1	0	0	1	1	0	0	0	1	0	0	0	-1	0	0	5	4	1	10
ENSMUSG00000021147	0	0	0	0	0	0	0	0	1	0	0	1	0	1	1	4	4	0	11
ENSMUSG00000032372	1	0	0	1	1	0	0	0	-1	0	0	0	0	0	1	5	4	1	10
ENSMUSG00000032376	1	0	0	0	0	0	0	0	1	0	1	0	0	0	1	4	4	0	11
ENSMUSG00000039985	0	0	0	1	1	1	0	0	-1	0	-1	0	0	1	0	6	4	2	9
ENSMUSG00000033075	0	0	0	0	0	0	0	0	1	0	1	0	0	1	1	4	4	0	11
ENSMUSG00000058216	0	0	0	1	0	0	0	0	1	1	1	0	0	0	0	4	4	0	11
ENSMUSG00000079442	1	0	0	1	-1	0	0	0	1	0	0	0	0	1	0	5	4	1	10
ENSMUSG00000024640	1	0	0	1	1	0	1	0	0	0	0	0	0	0	-1	5	4	1	10
ENSMUSG00000058318	0	0	0	1	0	0	0	0	0	1	1	1	0	0	0	4	4	0	11
ENSMUSG00000056071	1	0	0	1	0	0	0	0	1	1	0	0	0	0	0	4	4	0	11
ENSMUSG00000029204	1	0	1	1	0	1	0	0	0	0	-1	0	0	0	0	5	4	1	10
ENSMUSG00000026880	0	0	0	1	0	0	0	0	-1	1	1	0	0	0	1	5	4	1	10
ENSMUSG00000005198	0	0	0	1	1	-1	0	0	1	0	-1	1	0	-1	0	7	4	3	8
ENSMUSG00000009681	0	0	0	1	1	0	0	0	1	1	-1	0	0	0	-1	6	4	2	9
ENSMUSG00000048498	1	0	0	1	0	0	0	0	0	0	0	0	0	1	1	4	4	0	11
ENSMUSG00000078486	0	0	0	0	0	0	0	0	1	1	0	0	0	1	1	4	4	0	11
ENSMUSG00000010453	1	0	0	0	0	0	0	0	-1	0	1	1	0	0	1	5	4	1	10
ENSMUSG00000099398	1	0	0	1	0	0	0	0	0	0	0	0	0	1	1	4	4	0	11
ENSMUSG00000036661	0	0	0	1	0	0	0	0	1	1	1	0	0	0	0	4	4	0	11
ENSMUSG00000032119	0	0	0	0	0	0	0	0	0	0	1	1	0	1	1	4	4	0	11
ENSMUSG00000040128	0	0	0	0	0	0	0	0	1	1	-1	1	0	0	1	5	4	1	10
ENSMUSG00000024781	-1	0	0	0	1	0	1	0	1	0	0	1	0	0	0	5	4	1	10
ENSMUSG00000078453	1	0	0	0	0	0	0	0	1	1	1	0	-1	0	0	5	4	1	10
ENSMUSG00000001227	1	0	0	1	0	0	0	0	1	0	1	0	0	-1	0	5	4	1	10
ENSMUSG00000026786	1	0	0	1	0	0	0	0	1	-1	1	0	0	0	0	5	4	1	10
ENSMUSG00000035638	1	0	0	0	0	0	0	0	1	1	1	0	0	0	0	4	4	0	11
ENSMUSG00000026123	0	0	0	-1	0	0	0	0	1	1	1	1	0	0	0	5	4	1	10
ENSMUSG00000022205	0	0	0	1	1	0	0	0	1	1	-1	0	0	0	0	5	4	1	10
ENSMUSG00000029787	0	0	0	1	0	0	0	0	1	0	0	1	0	0	1	4	4	0	11
ENSMUSG00000006127	0	0	0	0	-1	-1	0	0	1	0	1	0	0	1	1	6	4	2	9
ENSMUSG00000095280	0	0	0	0	0	0	0	0	1	1	0	1	1	0	0	4	4	0	11
ENSMUSG00000032350	0	0	0	1	1	0	0	0	1	0	0	0	1	-1	0	5	4	1	10
ENSMUSG00000024669	1	0	1	1	0	0	0	0	0	1	0	0	0	0	0	4	4	0	11
ENSMUSG00000024660	0	0	0	1	0	-1	0	0	1	1	1	0	0	0	0	5	4	1	10
ENSMUSG00000030681	1	0	0	1	0	0	0	0	0	0	0	0	0	1	1	4	4	0	11
ENSMUSG00000022849	1	0	0	1	1	0	0	0	-1	1	0	0	0	0	0	5	4	1	10
ENSMUSG00000048701	1	0	0	1	0	0	0	0	0	0	1	0	0	1	0	4	4	0	11
ENSMUSG00000032369	1	0	0	1	0	0	0	0	-1	0	-1	1	0	0	1	6	4	2	9
ENSMUSG00000043832	1	0	1	1	0	0	0	0	0	0	0	0	0	0	1	4	4	0	11
ENSMUSG00000034765	1	0	0	1	0	0	0	0	1	1	-1	0	0	0	0	5	4	1	10
ENSMUSG00000069516	-1	0	1	1	0	0	-1	0	1	1	0	0	0	0	0	6	4	2	9
ENSMUSG00000036948	1	0	0	1	0	0	0	0	-1	0	1	0	0	1	0	5	4	1	10
ENSMUSG00000028191	1	0	0	1	1	0	1	0	0	0	0	0	-1	0	0	5	4	1	10
ENSMUSG00000028195	0	0	0	1	1	0	0	0	1	0	0	1	-1	0	-1	6	4	2	9
ENSMUSG00000066406	0	0	0	0	0	0	0	0	1	1	1	0	0	-1	1	5	4	1	10
ENSMUSG00000054008	-1	0	0	1	0	-1	0	0	1	1	1	0	0	-1	0	7	4	3	8
ENSMUSG00000028691	0	0	0	0	1	0	0	0	1	1	0	0	1	0	0	4	4	0	11
ENSMUSG00000033671	0	0	0	1	0	0	0	0	-1	0	1	0	0	1	1	5	4	1	10
ENSMUSG00000039646	0	0	0	0	1	1	0	0	1	-1	1	0	-1	0	-1	7	4	3	8
ENSMUSG00000055200	1	0	0	1	0	0	0	0	0	0	-1	0	0	1	1	5	4	1	10
ENSMUSG00000015671	1	0	0	1	-1	0	0	0	1	0	0	-1	0	1	0	6	4	2	9
ENSMUSG00000039990	0	0	0	0	1	0	0	0	1	0	1	1	0	0	0	4	4	0	11
ENSMUSG00000086213	1	0	0	1	0	0	0	0	0	0	0	0	0	1	1	4	4	0	11
ENSMUSG00000027952	0	0	0	0	1	0	0	0	1	1	1	0	0	0	0	4	4	0	11
ENSMUSG00000030327	0	0	0	0	0	1	0	0	-1	0	-1	1	0	1	1	6	4	2	9
ENSMUSG00000029014	1	0	0	1	0	0	0	0	-1	0	1	0	0	0	1	5	4	1	10
ENSMUSG00000035311	0	0	0	1	0	0	0	0	1	1	1	0	0	0	0	4	4	0	11
ENSMUSG00000085894	1	0	0	1	0	0	0	0	1	1	0	0	0	0	0	4	4	0	11
ENSMUSG00000020680	1	0	0	1	0	0	0	0	-1	-1	0	1	0	1	0	6	4	2	9
ENSMUSG00000026020	1	0	0	1	1	1	0	0	0	0	-1	0	0	0	0	5	4	1	10
ENSMUSG00000018171	1	0	0	1	0	0	0	0	1	1	0	0	-1	0	0	5	4	1	10
ENSMUSG00000050002	1	0	0	1	0	0	0	0	1	0	0	0	0	0	1	4	4	0	11
ENSMUSG00000030403	1	0	0	0	-1	0	0	0	1	0	0	0	0	1	1	5	4	1	10
ENSMUSG00000040522	1	0	0	1	0	0	0	0	0	0	0	0	0	1	1	4	4	0	11
ENSMUSG00000046962	0	0	0	1	1	0	0	0	-1	0	0	1	0	0	1	5	4	1	10
ENSMUSG00000085156	0	0	0	1	1	1	0	0	1	0	0	0	0	0	0	4	4	0	11
ENSMUSG00000025279	1	0	0	1	0	0	0	0	0	1	0	0	0	0	1	4	4	0	11
ENSMUSG00000002068	1	0	0	1	0	0	0	0	0	1	1	0	0	0	0	4	4	0	11
ENSMUSG00000027435	0	0	1	0	0	0	0	0	1	1	1	0	0	-1	0	5	4	1	10
ENSMUSG00000078495	0	0	0	1	-1	0	0	0	1	0	1	0	0	0	1	5	4	1	10
ENSMUSG00000025898	0	0	0	1	0	0	0	0	1	0	-1	1	0	0	1	5	4	1	10
ENSMUSG00000040865	0	0	0	1	0	0	0	0	-1	0	1	1	0	0	1	5	4	1	10
ENSMUSG00000001089	0	0	0	0	0	-1	0	0	-1	0	1	1	0	1	1	6	4	2	9
ENSMUSG00000050619	0	0	0	1	0	0	0	0	-1	0	1	0	0	1	1	5	4	1	10
ENSMUSG00000067219	-1	0	0	1	1	0	1	0	1	0	0	0	0	0	-1	6	4	2	9
ENSMUSG00000038252	1	0	0	0	0	0	0	0	1	1	1	0	0	0	-1	5	4	1	10
ENSMUSG00000038256	1	0	0	1	0	0	0	0	-1	0	-1	0	0	1	1	6	4	2	9
ENSMUSG00000025591	0	0	0	1	1	0	0	0	-1	1	0	0	0	0	1	5	4	1	10
ENSMUSG00000095134	1	0	0	1	0	0	0	0	0	0	0	0	0	1	1	4	4	0	11
ENSMUSG00000006169	1	0	0	1	0	0	0	0	1	1	0	0	0	0	0	4	4	0	11
ENSMUSG00000102425	1	0	0	1	0	1	0	0	-1	0	1	0	-1	0	0	6	4	2	9
ENSMUSG00000052056	0	0	0	1	0	0	0	0	-1	1	1	0	-1	0	1	6	4	2	9
ENSMUSG00000029430	1	0	0	1	1	1	0	0	-1	0	-1	0	0	0	0	6	4	2	9
ENSMUSG00000037991	1	0	0	1	0	0	0	0	1	1	0	0	0	0	0	4	4	0	11
ENSMUSG00000028522	0	0	0	0	1	0	0	0	0	0	1	1	0	0	1	4	4	0	11
ENSMUSG00000032312	1	0	0	1	0	-1	0	0	-1	-1	0	0	0	1	1	7	4	3	8
ENSMUSG00000053907	0	0	0	0	1	1	1	0	-1	0	-1	-1	0	1	0	7	4	3	8
ENSMUSG00000029863	0	0	0	0	0	0	0	0	1	0	-1	1	0	1	1	5	4	1	10
ENSMUSG00000005087	1	0	0	1	1	0	0	0	1	-1	-1	0	0	0	0	6	4	2	9
ENSMUSG00000021738	0	0	0	1	0	0	0	0	1	0	1	0	0	0	1	4	4	0	11
ENSMUSG00000033192	1	0	0	1	0	0	0	0	-1	0	0	0	0	1	1	5	4	1	10
ENSMUSG00000027605	0	0	0	-1	0	0	0	0	1	0	1	0	0	1	1	5	4	1	10
ENSMUSG00000031591	0	0	0	1	0	0	0	0	1	1	1	0	0	0	0	4	4	0	11
ENSMUSG00000003484	1	0	1	1	0	0	0	0	0	1	0	0	0	0	0	4	4	0	11
ENSMUSG00000075327	0	0	0	0	1	1	1	0	-1	0	1	0	0	0	0	5	4	1	10
ENSMUSG00000089940	1	0	0	1	0	0	0	0	0	0	0	0	0	1	1	4	4	0	11
ENSMUSG00000026596	1	0	0	1	0	0	0	0	1	0	1	0	0	0	0	4	4	0	11
ENSMUSG00000001517	0	0	0	1	0	0	0	0	1	1	1	0	0	0	-1	5	4	1	10
ENSMUSG00000042489	1	0	0	1	0	0	0	0	0	1	1	0	0	0	-1	5	4	1	10
ENSMUSG00000097195	0	0	0	1	1	0	0	0	1	0	1	0	0	0	0	4	4	0	11
ENSMUSG00000063785	0	0	0	1	0	0	0	0	1	0	1	0	0	0	1	4	4	0	11
ENSMUSG00000017561	1	0	0	1	0	0	0	0	1	0	0	0	0	0	1	4	4	0	11
ENSMUSG00000113029	1	1	0	1	0	0	0	0	-1	0	0	0	0	0	1	5	4	1	10
ENSMUSG00000041598	1	0	0	1	-1	0	0	0	1	0	0	0	-1	0	1	6	4	2	9
ENSMUSG00000027018	1	0	0	1	0	0	0	0	-1	0	0	0	0	1	1	5	4	1	10
ENSMUSG00000014867	1	0	0	1	0	0	0	0	1	1	0	0	0	0	0	4	4	0	11
ENSMUSG00000038235	0	0	0	1	1	0	0	0	-1	0	0	-1	0	1	1	6	4	2	9
ENSMUSG00000043059	1	0	0	1	0	0	0	0	-1	0	0	0	0	1	1	5	4	1	10
ENSMUSG00000031015	-1	0	0	1	0	0	0	0	-1	1	1	1	0	0	0	6	4	2	9
ENSMUSG00000003123	1	0	0	1	0	0	0	0	0	0	-1	0	0	1	1	5	4	1	10
ENSMUSG00000029415	0	0	0	1	1	1	1	0	-1	0	0	0	0	0	0	5	4	1	10
ENSMUSG00000023845	0	0	0	1	0	0	0	0	1	0	1	0	0	0	1	4	4	0	11
ENSMUSG00000028099	1	0	0	1	-1	0	0	0	0	0	1	0	0	0	1	5	4	1	10
ENSMUSG00000024399	1	0	1	1	0	0	0	0	1	0	-1	0	0	0	0	5	4	1	10
ENSMUSG00000035711	1	0	0	1	0	-1	0	0	-1	1	0	0	0	0	1	6	4	2	9
ENSMUSG00000002233	1	0	0	1	0	0	0	0	1	0	0	0	0	1	-1	5	4	1	10
ENSMUSG00000054385	1	0	0	1	1	0	0	0	1	0	0	0	0	0	0	4	4	0	11
ENSMUSG00000072244	1	1	0	1	0	0	0	0	0	0	0	0	0	0	1	4	4	0	11
ENSMUSG00000097312	0	0	0	0	0	0	0	0	1	1	0	1	1	0	0	4	4	0	11
ENSMUSG00000023272	1	0	0	1	1	0	0	0	-1	0	-1	1	-1	0	0	7	4	3	8
ENSMUSG00000023274	1	0	1	1	0	0	0	0	0	0	0	0	0	0	1	4	4	0	11
ENSMUSG00000026021	1	0	0	0	1	0	0	0	-1	0	0	0	0	1	1	5	4	1	10
ENSMUSG00000034297	0	0	0	1	0	0	0	0	1	0	1	0	0	0	1	4	4	0	11
ENSMUSG00000012443	1	0	0	1	0	0	0	0	0	1	1	0	0	0	-1	5	4	1	10
ENSMUSG00000029622	1	0	0	1	0	0	0	0	1	0	1	0	0	0	0	4	4	0	11
ENSMUSG00000083041	1	0	1	1	0	0	0	0	0	1	0	0	0	0	0	4	4	0	11
ENSMUSG00000028282	0	0	0	1	1	0	0	0	1	0	1	0	0	0	0	4	4	0	11
ENSMUSG00000032436	1	0	1	1	1	0	0	0	-1	0	0	0	0	0	0	5	4	1	10
ENSMUSG00000024563	0	0	0	0	1	0	0	0	1	-1	1	1	0	0	0	5	4	1	10
ENSMUSG00000105195	0	0	0	0	1	0	0	0	0	0	0	1	0	1	1	4	4	0	11
ENSMUSG00000027035	1	0	0	1	0	0	0	0	-1	0	0	0	0	1	1	5	4	1	10
ENSMUSG00000022021	0	0	0	0	0	0	0	0	1	1	1	1	0	0	-1	5	4	1	10
ENSMUSG00000030579	1	0	1	1	0	0	0	0	1	0	0	0	0	0	0	4	4	0	11
ENSMUSG00000022280	-1	0	0	0	1	0	0	0	-1	1	1	1	0	0	0	6	4	2	9
ENSMUSG00000022283	0	0	0	1	0	0	0	0	1	1	1	0	0	0	0	4	4	0	11
ENSMUSG00000028709	1	0	0	1	1	0	0	0	0	-1	-1	0	0	0	1	6	4	2	9
ENSMUSG00000020189	0	0	0	1	0	1	0	0	1	-1	0	1	0	-1	0	6	4	2	9
ENSMUSG00000029474	0	0	0	0	-1	1	0	0	0	1	0	0	0	1	1	5	4	1	10
ENSMUSG00000021707	1	0	0	1	0	0	0	0	1	0	1	0	0	0	0	4	4	0	11
ENSMUSG00000083563	0	0	0	-1	1	1	1	0	1	0	-1	0	0	0	-1	7	4	3	8
ENSMUSG00000033952	0	0	1	1	0	0	0	0	0	1	1	0	0	0	-1	5	4	1	10
ENSMUSG00000079555	0	0	0	1	0	-1	0	0	1	0	1	1	0	0	0	5	4	1	10
ENSMUSG00000041143	1	0	0	1	0	0	0	0	1	0	0	0	0	0	1	4	4	0	11
ENSMUSG00000078370	1	0	0	0	0	0	0	0	1	1	1	0	0	0	-1	5	4	1	10
ENSMUSG00000054364	1	0	0	1	-1	0	0	0	-1	1	-1	1	-1	-1	-1	10	4	6	5
ENSMUSG00000026648	1	0	0	1	0	0	0	0	0	0	0	0	0	1	1	4	4	0	11
ENSMUSG00000024910	1	0	1	1	0	0	0	0	1	-1	-1	0	0	0	0	6	4	2	9
ENSMUSG00000058672	0	0	0	1	1	0	1	0	1	0	-1	0	0	-1	0	6	4	2	9
ENSMUSG00000037475	0	0	0	0	0	0	0	0	1	0	1	1	1	0	0	4	4	0	11
ENSMUSG00000024059	1	0	0	1	0	0	0	0	1	0	1	0	0	0	0	4	4	0	11
ENSMUSG00000071552	1	0	1	1	0	0	0	0	0	1	0	0	0	0	0	4	4	0	11
ENSMUSG00000001052	0	0	0	1	1	-1	0	0	-1	0	1	1	0	0	0	6	4	2	9
ENSMUSG00000018076	0	0	0	1	0	0	0	0	1	0	1	0	0	0	1	4	4	0	11
ENSMUSG00000028703	1	0	0	0	0	0	1	0	1	0	0	0	0	0	1	4	4	0	11
ENSMUSG00000028702	1	0	0	0	0	0	0	0	1	1	1	0	0	0	0	4	4	0	11
ENSMUSG00000061136	0	0	0	1	0	0	0	0	1	0	1	1	0	0	0	4	4	0	11
ENSMUSG00000020918	1	0	0	1	0	0	0	0	1	0	-1	0	0	1	0	5	4	1	10
ENSMUSG00000040687	0	0	0	1	0	-1	0	0	1	1	1	0	0	0	0	5	4	1	10
ENSMUSG00000006411	1	0	0	1	0	0	0	0	0	0	0	0	0	1	1	4	4	0	11
ENSMUSG00000052031	1	0	0	1	0	1	0	0	-1	0	0	0	0	0	1	5	4	1	10
ENSMUSG00000079659	0	0	0	1	-1	0	0	0	1	-1	0	0	0	1	1	6	4	2	9
ENSMUSG00000034663	1	0	0	1	0	0	0	0	-1	1	0	1	0	-1	0	6	4	2	9
ENSMUSG00000074063	0	0	0	0	1	0	0	0	1	1	0	0	0	-1	1	5	4	1	10
ENSMUSG00000021660	1	0	0	0	1	0	0	0	1	1	0	0	0	0	0	4	4	0	11
ENSMUSG00000028583	1	0	0	1	1	0	0	0	1	0	0	0	0	0	0	4	4	0	11
ENSMUSG00000049882	0	0	0	1	0	0	0	0	1	1	1	0	0	0	0	4	4	0	11
ENSMUSG00000091228	1	0	0	1	1	0	0	0	1	0	-1	0	0	0	0	5	4	1	10
ENSMUSG00000091223	0	0	0	1	1	0	0	0	1	0	-1	0	0	0	1	5	4	1	10
ENSMUSG00000045799	1	0	0	1	1	1	0	0	-1	0	-1	0	0	0	0	6	4	2	9
ENSMUSG00000075256	1	0	0	0	0	0	0	0	-1	-1	1	0	0	1	1	6	4	2	9
ENSMUSG00000058470	1	0	0	1	0	0	0	0	0	0	0	0	0	1	1	4	4	0	11
ENSMUSG00000058690	-1	0	0	0	0	0	0	0	1	1	1	1	0	0	0	5	4	1	10
ENSMUSG00000095990	0	0	0	0	0	0	0	0	1	-1	1	1	0	0	1	5	4	1	10
ENSMUSG00000032902	1	0	0	-1	1	0	0	0	1	1	0	0	0	0	-1	6	4	2	9
ENSMUSG00000031537	0	0	0	1	0	-1	0	0	1	0	1	0	0	0	1	5	4	1	10
ENSMUSG00000080917	1	0	1	1	0	0	0	0	0	0	0	0	0	0	1	4	4	0	11
ENSMUSG00000051316	1	0	0	1	0	0	0	0	-1	1	-1	0	-1	0	1	7	4	3	8
ENSMUSG00000022184	0	0	0	1	0	0	0	0	1	0	-1	0	0	1	1	5	4	1	10
ENSMUSG00000041229	0	0	0	1	-1	0	0	0	-1	0	1	1	1	0	0	6	4	2	9
ENSMUSG00000039285	1	0	0	1	0	0	0	0	-1	-1	0	0	0	1	1	6	4	2	9
ENSMUSG00000040351	0	0	0	1	0	0	0	0	1	0	1	0	0	0	1	4	4	0	11
ENSMUSG00000039294	1	0	0	1	0	0	1	0	-1	0	-1	0	0	0	1	6	4	2	9
ENSMUSG00000022964	-1	0	0	-1	0	0	0	0	1	1	1	1	0	0	0	6	4	2	9
ENSMUSG00000055805	1	0	0	1	0	0	0	0	1	0	1	0	0	0	0	4	4	0	11
ENSMUSG00000020936	1	0	0	1	-1	0	0	0	1	0	1	0	0	0	0	5	4	1	10
ENSMUSG00000076258	1	1	0	0	0	1	0	0	1	0	0	0	0	0	0	4	4	0	11
ENSMUSG00000019659	0	0	0	1	0	0	0	0	1	0	1	0	0	0	1	4	4	0	11
ENSMUSG00000084348	0	0	0	1	0	0	0	1	0	0	0	0	0	1	1	4	4	0	11
ENSMUSG00000028577	1	0	0	1	1	0	0	0	0	0	1	0	0	0	0	4	4	0	11
ENSMUSG00000034135	0	0	0	1	0	0	0	0	-1	0	1	0	0	1	1	5	4	1	10
ENSMUSG00000034641	1	0	1	1	0	0	0	0	0	0	0	0	0	0	1	4	4	0	11
ENSMUSG00000020484	1	0	0	1	-1	0	0	0	0	0	-1	1	0	1	0	6	4	2	9
ENSMUSG00000002297	0	0	0	1	0	0	0	0	1	1	1	0	0	0	0	4	4	0	11
ENSMUSG00000030536	0	0	0	1	0	0	0	0	1	0	1	1	0	0	0	4	4	0	11
ENSMUSG00000036693	0	0	0	1	1	0	0	0	1	0	0	1	0	0	0	4	4	0	11
ENSMUSG00000002835	1	0	0	1	0	0	0	0	-1	1	1	0	0	0	-1	6	4	2	9
ENSMUSG00000024483	0	0	0	1	0	0	0	0	1	0	1	0	0	-1	1	5	4	1	10
ENSMUSG00000030930	1	0	0	1	0	0	0	0	1	0	-1	0	0	1	0	5	4	1	10
ENSMUSG00000040274	0	0	0	1	0	0	0	0	0	1	1	0	0	1	0	4	4	0	11
ENSMUSG00000080772	1	0	0	1	0	0	0	0	0	0	0	0	0	1	1	4	4	0	11
ENSMUSG00000019173	1	0	0	1	0	0	0	0	1	0	0	0	0	1	0	4	4	0	11
ENSMUSG00000026360	0	0	0	-1	0	1	0	0	1	1	-1	0	0	1	0	6	4	2	9
ENSMUSG00000054509	1	0	0	1	0	0	0	0	-1	1	1	0	0	0	0	5	4	1	10
ENSMUSG00000059325	0	0	0	1	1	0	0	0	-1	1	1	0	0	0	0	5	4	1	10
ENSMUSG00000041278	1	0	0	1	0	0	0	0	1	0	0	0	0	0	1	4	4	0	11
ENSMUSG00000056413	1	0	0	0	0	0	0	0	1	1	0	0	0	0	1	4	4	0	11
ENSMUSG00000080223	0	0	0	1	0	0	0	0	0	1	1	0	0	0	1	4	4	0	11
ENSMUSG00000022300	1	0	0	1	1	0	0	0	1	0	0	0	0	0	0	4	4	0	11
ENSMUSG00000089698	1	0	0	0	0	0	0	0	-1	0	1	1	0	0	1	5	4	1	10
ENSMUSG00000006599	1	0	0	0	1	0	0	0	1	0	1	0	0	-1	0	5	4	1	10
ENSMUSG00000049751	1	0	0	1	0	0	0	0	1	1	0	0	0	0	0	4	4	0	11
ENSMUSG00000034361	1	0	0	1	0	0	0	0	1	1	0	0	0	0	0	4	4	0	11
ENSMUSG00000050957	0	0	0	1	0	0	0	0	0	1	1	0	0	0	1	4	4	0	11
ENSMUSG00000061175	0	0	0	1	1	0	0	0	1	1	0	0	0	-1	0	5	4	1	10
ENSMUSG00000098188	0	0	0	1	0	1	0	0	1	0	0	0	0	0	1	4	4	0	11
ENSMUSG00000022946	0	0	0	1	-1	0	0	0	1	0	1	0	0	0	1	5	4	1	10
ENSMUSG00000020953	1	0	0	1	0	0	0	0	0	1	1	0	0	0	0	4	4	0	11
ENSMUSG00000037553	0	0	0	1	0	0	0	0	1	0	0	0	0	1	1	4	4	0	11
ENSMUSG00000030055	1	0	0	1	0	0	0	0	1	0	0	0	0	0	1	4	4	0	11
ENSMUSG00000040648	0	0	0	0	1	0	0	0	0	0	1	0	0	1	1	4	4	0	11
ENSMUSG00000026321	1	0	0	0	0	0	0	0	1	0	0	0	0	1	1	4	4	0	11
[truncated: 19,148 more rows]
