# Supplementary material for: Virus-induced transposable element expression up-regulation in human and mouse host cells
Source: Life Sci Alliance. 2020 Jan 21;3(2):e201900536. doi: 10.26508/lsa.201900536 (PMC6977392; doi:10.26508/lsa.201900536)
Supplement: Supplementary file 4 [file LSA-2019-00536_TableS4.xlsx]

## Sheet: hg38.TEtrans.repeats.FDR0.05
# TEtranscripts repeat subfamily results for human virus data sets
# hg38; TEtranscripts; repeat subfamily quantification; FDR < 0.05
	DFV	EBOV	EBOV_MDM	EBOVtcell	EBV	HCMV	HCV	HIVact	HIVrest	HPV	HRSV	HSV1	IAV	KSHVhuvec	KSHVmc116	MeV	ORFV	RESTV	RVFV	SeV	SINV	VZV	ZKV	totDE	DEup	DEdown	notDE
HERVK13-int:ERVK:LTR	0	-1	0	0	-1	1	0	1	1	0	0	1	1	0	0	0	0	0	1	1	1	1	1	12	10	2	11		1	upregulated during infection (FDR < 0.05)
ALR/Alpha:centr:Satellite	0	1	0	0	-1	1	-1	1	1	0	0	1	0	0	1	0	0	0	1	1	1	0	0	11	9	2	12		0	no change due to infection
PRIMA41-int:ERV1:LTR	0	0	0	0	-1	1	0	1	0	0	0	1	1	0	0	1	1	0	1	1	1	0	0	10	9	1	13		-1	downregulated during infection (FDR < 0.05)
LTR12D:ERV1:LTR	1	0	0	0	-1	1	0	1	0	0	0	1	1	0	0	0	0	0	1	1	1	1	0	10	9	1	13
MamRep38:hAT:DNA	0	0	1	0	0	1	0	0	0	0	1	1	1	0	0	0	1	0	1	1	0	0	0	8	8	0	15
MER33:hAT-Charlie:DNA	1	0	0	0	-1	1	0	0	0	0	0	1	1	0	0	0	0	0	1	1	1	1	0	9	8	1	14
LTR103_Mam:ERV1?:LTR	0	0	1	0	-1	1	1	0	0	0	-1	1	0	0	0	1	0	0	1	1	1	0	0	10	8	2	13
THE1C-int:ERVL-MaLR:LTR	1	0	1	0	-1	1	-1	0	0	0	0	1	1	0	0	1	0	0	1	1	0	0	0	10	8	2	13
HERV9N-int:ERV1:LTR	0	1	1	0	-1	1	0	1	0	0	0	1	1	0	0	0	0	0	1	1	0	0	0	9	8	1	14
HERVK-int:ERVK:LTR	0	-1	1	0	-1	1	1	-1	-1	0	-1	1	0	0	0	0	0	1	1	1	1	-1	0	14	8	6	9
L1M2a:L1:LINE	1	1	0	0	-1	1	1	0	0	0	0	1	0	0	0	0	0	0	1	1	0	1	0	9	8	1	14
LTR33B:ERVL:LTR	1	1	0	0	-1	1	-1	0	0	0	0	1	1	0	0	0	0	0	1	1	1	0	0	10	8	2	13
LTR6B:ERV1:LTR	1	1	0	0	-1	1	0	0	0	0	-1	1	1	0	0	1	0	0	1	1	0	0	0	10	8	2	13
MER96B:hAT-Tip100:DNA	1	0	0	0	-1	0	0	1	0	0	0	1	1	0	0	0	0	0	1	1	1	1	0	9	8	1	14
LTR48B:ERV1:LTR	0	0	0	0	1	1	-1	1	0	0	1	1	0	0	0	0	0	0	1	1	0	1	0	9	8	1	14
LTR12:ERV1:LTR	0	1	0	0	-1	0	0	1	0	0	1	1	1	0	0	0	0	0	1	1	1	0	0	9	8	1	14
AluYe5:Alu:SINE	1	0	0	1	-1	1	0	0	0	-1	0	1	1	0	0	0	0	0	1	1	0	0	0	9	7	2	14
MER34B:ERV1:LTR	1	1	0	0	-1	1	0	0	0	0	0	1	0	0	0	0	0	0	1	1	0	0	1	8	7	1	15
LTR13A:ERVK:LTR	0	1	0	0	0	-1	0	0	0	0	1	1	1	0	0	1	0	0	1	0	1	0	0	8	7	1	15
LTR78B:ERV1:LTR	0	0	0	0	-1	1	-1	0	0	0	0	1	1	0	0	0	0	0	1	1	1	1	0	9	7	2	14
MLT1J:ERVL-MaLR:LTR	1	0	0	0	-1	1	0	0	0	0	0	1	1	0	0	1	0	0	1	1	0	0	0	8	7	1	15
7SLRNA:srpRNA:srpRNA	0	0	0	0	-1	1	0	1	0	0	0	1	1	0	0	0	0	0	1	1	0	1	0	8	7	1	15
LTR12B:ERV1:LTR	0	0	0	0	-1	-1	-1	1	0	0	1	1	1	0	0	0	0	0	1	1	1	0	0	10	7	3	13
L1PBa1:L1:LINE	0	0	1	0	-1	1	-1	0	0	0	-1	1	1	0	0	0	0	0	1	1	1	0	0	10	7	3	13
LTR1A2:ERV1:LTR	0	0	0	0	-1	1	0	0	0	0	1	1	0	0	0	0	1	1	1	1	0	0	0	8	7	1	15
L1M4a2:L1:LINE	0	0	0	0	-1	1	0	0	0	0	0	1	1	0	0	1	1	0	1	1	0	0	0	8	7	1	15
CR1-16_AMi:CR1:LINE	1	0	0	0	-1	1	1	0	0	0	0	1	0	0	0	1	0	0	1	1	0	0	0	8	7	1	15
HERVIP10B3-int:ERV1:LTR	0	1	0	0	-1	-1	-1	0	1	0	-1	1	1	0	0	0	1	0	1	1	-1	0	0	12	7	5	11
HERVL18-int:ERVL:LTR	0	-1	0	0	-1	1	0	0	0	0	0	1	1	0	0	0	0	0	1	1	1	0	1	9	7	2	14
HSAT4:centr:Satellite	1	1	0	0	-1	-1	0	0	0	1	0	1	1	0	0	0	0	1	-1	1	-1	0	0	11	7	4	12
Harlequin-int:ERV1:LTR	0	1	0	0	0	0	0	0	0	0	-1	1	1	0	0	0	0	0	1	1	1	0	1	8	7	1	15
LTR13:ERVK:LTR	0	0	0	0	-1	0	-1	1	0	0	0	1	0	0	0	1	0	0	1	1	1	1	0	9	7	2	14
MER53:hAT:DNA	1	0	0	0	-1	1	0	0	0	0	0	1	0	0	0	1	0	0	1	1	1	-1	0	9	7	2	14
Charlie7:hAT-Charlie:DNA	0	0	0	0	-1	1	0	0	0	0	1	1	1	0	0	0	0	0	1	1	0	1	0	8	7	1	15
SATR1:Satellite:Satellite	1	-1	1	0	-1	0	-1	0	0	0	0	1	1	0	0	0	0	0	1	-1	1	0	1	11	7	4	12
MER72:ERV1:LTR	1	1	0	0	-1	0	0	0	0	0	0	1	1	0	0	0	0	0	1	1	1	-1	0	9	7	2	14
ERV24_Prim-int:ERV1:LTR	0	0	0	0	-1	0	0	0	0	0	0	1	1	0	0	0	0	0	1	1	1	1	1	8	7	1	15
LTR2C:ERV1:LTR	0	1	0	0	0	-1	0	0	0	0	0	1	1	0	0	1	0	0	1	1	1	0	0	8	7	1	15
MER41E:ERV1:LTR	0	0	0	0	-1	1	0	1	0	0	0	1	0	0	0	0	0	0	1	1	1	1	0	8	7	1	15
Ricksha_b:MULE-MuDR:DNA	0	1	1	0	-1	1	1	0	0	0	-1	1	0	0	0	0	0	0	1	1	0	0	0	9	7	2	14
LTR104_Mam:Gypsy:LTR	1	0	0	0	-1	1	-1	0	0	0	0	1	1	0	0	0	0	0	1	1	1	0	0	9	7	2	14
ERV3-16A3_I-int:ERVL:LTR	0	0	0	0	-1	0	-1	1	0	0	0	1	1	0	0	0	0	0	1	1	1	0	1	9	7	2	14
HERV16-int:ERVL:LTR	0	1	0	0	-1	1	-1	0	0	0	-1	1	1	0	0	0	0	0	1	1	1	0	0	10	7	3	13
LTR81C:Gypsy:LTR	0	0	0	0	-1	1	0	0	0	0	0	1	1	0	0	1	0	0	1	1	1	0	0	8	7	1	15
LTR26:ERV1:LTR	0	1	0	0	0	0	0	0	0	0	1	1	0	0	0	1	0	0	1	1	1	0	0	7	7	0	16
THE1B:ERVL-MaLR:LTR	0	0	0	0	-1	1	0	0	0	0	1	1	1	0	0	0	0	0	1	1	0	0	0	7	6	1	16
HERVIP10F-int:ERV1:LTR	-1	0	0	0	-1	1	0	1	1	0	0	1	0	0	1	0	0	0	1	0	0	0	0	8	6	2	15
MER45B:hAT-Tip100:DNA	0	0	0	0	-1	1	0	1	0	0	0	1	1	0	0	0	0	0	1	1	0	0	0	7	6	1	16
MLT1L:ERVL-MaLR:LTR	0	0	0	0	-1	1	0	0	0	0	0	1	1	0	0	1	0	0	1	1	0	0	0	7	6	1	16
MER4E1:ERV1:LTR	0	1	0	0	-1	1	0	0	0	0	0	1	0	0	0	0	1	0	1	0	1	0	0	7	6	1	16
MLT1J1:ERVL-MaLR:LTR	1	0	0	0	-1	1	0	0	0	0	0	1	1	0	0	0	0	0	1	1	0	0	0	7	6	1	16
MER21A:ERVL:LTR	0	1	0	0	-1	1	0	0	0	0	-1	1	1	0	0	0	0	0	1	1	0	0	0	8	6	2	15
MER65A:ERV1:LTR	0	1	0	0	-1	1	0	0	0	0	0	1	1	0	0	0	0	0	1	1	0	0	0	7	6	1	16
LTR12E:ERV1:LTR	0	0	-1	0	-1	0	-1	1	0	0	1	1	1	0	0	0	0	0	1	1	0	0	0	9	6	3	14
LTR54:ERV1:LTR	0	0	0	0	-1	1	0	1	0	0	0	1	1	0	0	0	0	0	1	1	0	0	0	7	6	1	16
LTR57-int:ERVL:LTR	-1	-1	0	0	-1	1	-1	0	0	0	0	1	0	0	0	-1	1	0	1	1	0	0	1	11	6	5	12
L1PBb:L1:LINE	0	-1	1	0	-1	0	0	0	0	0	0	1	0	0	0	1	0	0	1	0	1	0	1	8	6	2	15
PABL_A:ERV1:LTR	0	1	0	0	-1	1	0	0	0	0	0	1	1	0	0	0	0	0	1	1	0	-1	0	8	6	2	15
LOR1-int:ERV1:LTR	0	1	0	0	-1	-1	0	0	0	0	0	1	1	0	0	0	0	0	1	1	1	0	0	8	6	2	15
L1PA15-16:L1:LINE	0	0	0	0	-1	1	0	0	0	0	0	1	1	0	0	0	0	0	1	1	1	0	0	7	6	1	16
MER57B1:ERV1:LTR	0	0	0	0	0	1	0	0	0	0	0	1	1	0	0	1	0	0	1	1	0	0	0	6	6	0	17
Tigger3c:TcMar-Tigger:DNA	1	0	0	0	-1	1	0	0	0	0	0	1	0	0	0	1	0	0	1	1	0	0	0	7	6	1	16
MER77:ERVL:LTR	1	1	0	0	-1	-1	0	0	0	0	0	1	1	0	0	0	0	0	1	0	0	1	0	8	6	2	15
tRNA-Gln-CAA:tRNA:tRNA	-1	0	0	0	1	0	0	0	0	0	0	1	1	0	1	0	0	0	1	1	0	0	0	7	6	1	16
tRNA-Glu-GAG:tRNA:tRNA	0	1	0	1	0	0	0	0	0	0	0	1	1	0	0	0	0	0	0	1	0	0	1	6	6	0	17
LTR12C:ERV1:LTR	0	0	-1	0	-1	0	-1	1	0	0	1	1	0	0	0	0	0	0	1	1	1	0	0	9	6	3	14
LTR50:ERVL:LTR	1	0	0	0	-1	1	0	0	0	0	0	1	1	0	0	0	0	0	1	1	0	0	0	7	6	1	16
LTR9D:ERV1:LTR	0	0	0	0	-1	1	0	0	0	0	0	1	1	0	0	1	0	0	1	0	0	0	1	7	6	1	16
MLT1N2:ERVL-MaLR:LTR	0	0	0	0	-1	1	0	0	0	0	0	1	1	0	0	1	0	0	1	1	0	0	0	7	6	1	16
L1MD2:L1:LINE	1	0	0	0	-1	1	0	0	0	0	0	1	1	0	0	0	0	0	1	1	0	0	0	7	6	1	16
LTR25-int:ERV1:LTR	1	0	0	0	0	0	-1	0	0	0	1	1	0	0	0	0	0	0	1	-1	1	1	0	8	6	2	15
L1MC4:L1:LINE	1	0	0	0	-1	1	0	0	0	0	0	1	1	0	0	0	0	0	1	1	0	0	0	7	6	1	16
MER106A:hAT-Charlie:DNA	1	0	0	0	-1	1	0	0	0	0	0	1	1	0	0	0	0	0	1	1	0	0	0	7	6	1	16
MER52-int:ERV1:LTR	0	0	0	0	-1	1	-1	0	1	0	0	1	1	0	0	0	0	0	1	-1	0	0	1	9	6	3	14
Arthur1:hAT-Tip100:DNA	0	0	0	0	-1	1	0	0	0	0	0	1	1	0	0	0	0	0	1	1	1	0	0	7	6	1	16
LTR54B:ERV1:LTR	0	0	0	0	-1	1	0	0	0	0	0	1	1	0	0	0	0	0	1	1	0	1	0	7	6	1	16
L1MA5:L1:LINE	1	0	0	0	-1	1	0	0	0	0	0	1	1	0	0	0	0	0	1	1	0	0	0	7	6	1	16
LTR78:ERV1:LTR	1	0	0	0	-1	1	0	0	0	0	0	1	1	0	0	0	0	0	1	1	0	0	0	7	6	1	16
L1P3:L1:LINE	0	0	0	0	-1	1	-1	0	0	0	-1	1	1	0	0	0	0	0	1	1	0	1	0	9	6	3	14
MamRep1527:LTR:LTR	0	0	0	0	-1	1	0	0	0	0	0	1	1	0	0	0	0	0	1	1	1	0	0	7	6	1	16
MamTip2b:hAT-Tip100:DNA	0	0	0	0	1	1	-1	0	0	0	0	1	1	0	0	0	0	0	1	1	0	0	0	7	6	1	16
MER41A:ERV1:LTR	0	0	0	0	-1	1	1	0	0	0	1	1	1	0	0	0	0	0	1	-1	0	0	0	8	6	2	15
ERV24B_Prim-int:ERV1:LTR	0	0	0	0	-1	1	0	0	0	0	0	1	1	0	0	0	0	0	1	1	1	0	0	7	6	1	16
MamTip3:hAT-Tip100:DNA	1	0	0	0	-1	1	0	0	0	0	0	1	1	0	0	0	0	0	1	1	0	0	0	7	6	1	16
MER21B:ERVL:LTR	0	0	0	0	-1	1	0	0	0	0	1	1	1	0	0	0	0	0	1	1	0	0	0	7	6	1	16
MamGypLTR1c:Gypsy:LTR	1	0	0	0	-1	1	0	0	0	0	0	1	1	0	0	0	0	0	1	0	0	0	1	7	6	1	16
LTR18B:ERVL:LTR	0	0	0	0	-1	1	0	1	0	0	-1	1	0	0	0	0	0	0	1	1	0	0	1	8	6	2	15
LTR91A:LTR:LTR	0	0	0	0	-1	1	0	0	0	0	0	1	0	0	0	1	0	0	1	1	1	0	0	7	6	1	16
L1PBa:L1:LINE	0	0	0	0	-1	1	-1	0	0	0	0	1	1	0	0	0	0	0	1	1	0	1	0	8	6	2	15
HERVK11-int:ERVK:LTR	1	0	0	0	-1	1	0	0	0	0	-1	1	1	0	0	0	0	0	1	1	-1	0	0	9	6	3	14
tRNA-Ala-GCA:tRNA:tRNA	0	1	0	0	0	0	0	0	0	1	0	1	1	1	0	0	0	0	0	1	0	0	0	6	6	0	17
HERVFH19-int:ERV1:LTR	0	1	0	1	0	0	0	0	0	0	0	1	0	0	0	0	0	0	1	1	1	0	0	6	6	0	17
AluYc:Alu:SINE	1	0	0	0	-1	1	0	0	0	0	0	1	1	0	0	0	0	0	1	1	0	0	0	7	6	1	16
LTR65:ERV1:LTR	0	1	0	0	-1	1	0	0	0	0	0	1	1	0	0	0	0	0	1	0	1	0	0	7	6	1	16
SVA_D:SVA:Retroposon	1	0	0	0	-1	1	0	0	0	-1	0	1	1	0	0	0	0	0	1	1	0	0	0	8	6	2	15
LTR85a:Gypsy?:LTR	0	0	0	0	-1	1	0	0	0	0	-1	1	1	0	0	0	0	0	1	1	1	0	0	8	6	2	15
FordPrefect:hAT-Tip100:DNA	0	0	0	0	0	-1	-1	0	0	0	-1	1	1	0	0	-1	-1	0	1	-1	1	1	1	12	6	6	11
MLT1H-int:ERVL-MaLR:LTR	0	0	0	0	-1	1	-1	0	0	0	1	1	1	0	0	0	0	0	1	1	0	0	0	8	6	2	15
UCON105:hAT?:DNA	1	0	0	0	-1	1	0	0	0	0	0	1	1	0	0	0	0	0	1	1	0	0	0	7	6	1	16
LTR39:ERV1:LTR	0	0	0	0	-1	1	0	0	0	0	0	1	1	0	0	0	1	0	1	1	0	0	0	7	6	1	16
UCON34:hAT-Charlie:DNA	1	0	0	0	-1	0	0	0	0	0	1	1	0	0	0	1	0	0	1	1	0	0	0	7	6	1	16
LTR85c:Gypsy?:LTR	1	0	0	0	-1	1	0	0	0	0	0	1	0	0	0	0	0	0	1	1	1	0	0	7	6	1	16
MLT1A-int:ERVL-MaLR:LTR	1	0	1	0	-1	0	-1	0	0	0	0	1	1	0	0	0	0	0	1	1	0	0	0	8	6	2	15
LTR48:ERV1:LTR	0	0	0	0	-1	1	-1	0	0	0	0	1	1	0	0	1	0	1	1	-1	0	0	0	9	6	3	14
L1M3f:L1:LINE	0	0	1	0	-1	1	-1	0	0	0	0	1	1	0	0	0	0	0	1	1	0	0	0	8	6	2	15
MER70-int:ERVL:LTR	0	1	0	0	-1	1	0	0	0	0	0	1	0	0	0	0	0	0	1	1	0	0	1	7	6	1	16
LTR88b:Gypsy?:LTR	0	0	0	0	-1	1	-1	0	0	0	0	1	1	0	0	0	0	0	1	1	1	0	0	8	6	2	15
MER57F:ERV1:LTR	0	0	1	0	-1	1	0	0	0	0	0	1	0	0	0	1	0	0	1	1	0	0	0	7	6	1	16
Charlie24:hAT-Charlie:DNA	1	0	0	0	-1	0	0	0	0	0	0	1	1	0	0	1	0	0	1	1	0	0	0	7	6	1	16
Plat_L3:CR1:LINE	1	1	0	0	-1	1	0	0	0	0	-1	1	0	0	0	0	0	0	1	1	0	0	0	8	6	2	15
L1MC5:L1:LINE	1	0	0	0	-1	1	0	0	0	0	0	1	1	0	0	0	0	0	1	1	0	0	0	7	6	1	16
L1HS:L1:LINE	0	0	0	0	-1	1	0	0	0	0	0	1	1	0	0	0	0	0	1	1	0	1	0	7	6	1	16
THE1-int:ERVL-MaLR:LTR	1	0	0	0	0	1	0	0	0	0	0	1	1	0	0	0	0	0	1	1	0	0	0	6	6	0	17
MLT1O:ERVL-MaLR:LTR	1	0	0	0	-1	1	0	0	0	0	0	1	1	0	0	0	0	0	1	1	0	0	0	7	6	1	16
AluYg6:Alu:SINE	0	0	1	1	-1	1	-1	0	0	0	0	1	1	0	0	0	0	0	1	0	0	0	0	8	6	2	15
Charlie4z:hAT-Charlie:DNA	1	0	0	0	-1	1	0	0	0	0	0	1	1	0	0	0	0	0	1	1	0	0	0	7	6	1	16
AluYd8:Alu:SINE	0	0	0	0	-1	-1	0	1	0	0	0	1	1	0	0	0	0	0	1	1	-1	1	0	9	6	3	14
LTR1B:ERV1:LTR	0	0	0	0	-1	1	0	0	0	0	0	1	1	0	0	0	0	0	1	1	0	0	1	7	6	1	16
MamRep1879:hAT-Tip100?:DNA	1	0	0	0	-1	1	0	0	0	0	0	1	1	0	0	0	0	0	1	1	0	0	0	7	6	1	16
MER65D:ERV1:LTR	0	0	0	0	0	1	-1	0	0	0	0	1	1	0	0	0	0	0	1	1	0	1	0	7	6	1	16
BLACKJACK:hAT-Blackjack:DNA	0	1	0	0	-1	1	0	0	0	0	0	1	1	0	0	0	0	0	1	1	0	0	0	7	6	1	16
L1M4a1:L1:LINE	1	0	0	0	-1	1	0	0	0	0	0	1	1	0	0	0	0	0	1	1	0	0	0	7	6	1	16
Charlie29b:hAT-Charlie:DNA	1	0	0	0	0	1	0	0	0	0	-1	1	0	0	0	1	0	0	1	1	0	0	0	7	6	1	16
MER41B:ERV1:LTR	0	0	0	0	-1	1	0	0	0	0	0	1	1	0	0	1	0	0	1	1	0	0	0	7	6	1	16
LTR16B1:ERVL:LTR	0	0	0	0	-1	1	-1	0	0	0	0	1	1	0	0	0	0	0	1	1	1	0	0	8	6	2	15
MER45C:hAT-Tip100:DNA	0	0	0	0	-1	1	-1	0	0	0	0	1	1	0	0	1	0	0	1	-1	1	0	0	9	6	3	14
AluYk11:Alu:SINE	0	0	1	0	-1	1	0	0	0	0	0	1	1	0	0	0	0	0	1	1	0	0	0	7	6	1	16
LTR19A:ERV1:LTR	-1	0	0	0	-1	1	0	0	0	0	1	1	1	0	0	0	0	0	1	1	0	0	0	8	6	2	15
L1PA17:L1:LINE	0	0	0	0	-1	1	0	0	0	0	0	1	1	0	0	0	0	0	1	1	0	1	0	7	6	1	16
HERVL40-int:ERVL:LTR	0	0	0	0	-1	1	0	0	0	0	0	1	1	0	0	0	0	0	1	1	1	0	0	7	6	1	16
HERV35I-int:ERV1:LTR	0	0	0	0	-1	1	0	0	0	0	1	1	1	0	0	0	0	0	1	0	1	0	0	7	6	1	16
MER41C:ERV1:LTR	0	0	0	0	-1	1	0	0	0	0	-1	1	1	0	0	0	0	0	1	1	1	0	0	8	6	2	15
L1M6B:L1:LINE	1	0	0	0	-1	1	0	0	0	0	0	1	1	0	0	0	0	0	1	1	0	0	0	7	6	1	16
MER4-int:ERV1:LTR	1	0	0	0	-1	1	0	0	0	0	0	1	1	0	0	0	0	0	1	1	0	0	0	7	6	1	16
THE1B-int:ERVL-MaLR:LTR	1	0	0	0	-1	1	0	0	0	0	0	1	1	0	0	0	0	0	1	1	0	0	0	7	6	1	16
HERVE-int:ERV1:LTR	1	0	0	0	-1	0	1	0	0	0	-1	1	0	0	0	0	1	0	1	-1	0	1	0	9	6	3	14
MLT1H2:ERVL-MaLR:LTR	1	0	0	0	-1	1	0	0	0	0	0	1	1	0	0	0	0	0	1	1	0	0	0	7	6	1	16
LTR10F:ERV1:LTR	1	0	0	0	-1	0	0	0	0	0	1	1	1	0	0	0	0	0	1	1	0	0	0	7	6	1	16
AluYe6:Alu:SINE	0	0	0	0	-1	1	0	0	0	0	0	1	1	0	0	0	0	0	1	1	0	1	0	7	6	1	16
LTR30:ERV1:LTR	0	-1	0	0	1	-1	0	0	0	0	0	1	1	0	0	1	0	0	1	1	0	0	0	8	6	2	15
MER2:TcMar-Tigger:DNA	1	0	0	0	-1	1	0	0	0	0	0	1	1	0	0	0	0	0	1	1	0	0	0	7	6	1	16
MER31-int:ERV1:LTR	0	1	0	0	-1	0	0	0	0	0	0	1	1	0	0	0	0	0	1	-1	1	-1	1	9	6	3	14
MER39B:ERV1:LTR	0	0	0	0	-1	1	-1	0	0	0	0	1	1	0	0	0	0	0	1	1	0	1	0	8	6	2	15
L1MDa:L1:LINE	1	0	0	0	-1	1	0	0	0	0	0	1	1	0	0	0	0	0	1	1	0	0	0	7	6	1	16
LTR88a:Gypsy?:LTR	0	0	0	0	-1	1	0	0	0	0	0	1	1	0	0	0	0	0	1	1	1	0	0	7	6	1	16
Zaphod:hAT-Tip100:DNA	0	0	0	0	-1	1	0	0	0	0	0	1	1	0	0	0	0	0	1	1	1	0	0	7	6	1	16
LTR37A:ERV1:LTR	0	0	0	0	-1	1	0	0	0	0	1	1	1	0	0	0	0	0	1	1	0	0	0	7	6	1	16
Charlie17a:hAT-Charlie:DNA	0	0	0	0	-1	1	0	0	0	0	0	1	1	0	0	1	0	0	1	1	0	0	0	7	6	1	16
MSTB1:ERVL-MaLR:LTR	0	0	0	0	-1	1	0	0	0	0	0	1	1	0	0	1	0	0	1	1	0	0	0	7	6	1	16
AluSz:Alu:SINE	0	0	0	0	-1	1	0	0	0	0	0	1	1	0	0	0	0	0	1	1	0	0	0	6	5	1	17
ERV3-16A3_LTR:ERVL:LTR	0	1	0	0	-1	0	0	0	0	0	0	1	1	0	0	0	0	0	1	1	0	0	0	6	5	1	17
MLT1I-int:ERVL-MaLR:LTR	0	0	0	0	-1	1	0	0	0	0	0	1	0	0	0	0	0	0	1	1	0	1	0	6	5	1	17
AluYk2:Alu:SINE	0	0	0	0	-1	1	0	0	0	0	0	1	1	0	0	0	0	0	1	1	0	0	0	6	5	1	17
MER99:hAT?:DNA	1	0	0	0	-1	1	0	0	0	0	-1	1	0	0	0	1	0	0	1	0	0	0	0	7	5	2	16
AluYh3:Alu:SINE	0	0	0	0	-1	1	0	0	0	0	0	1	1	0	0	0	0	0	1	1	0	0	0	6	5	1	17
L1MA9:L1:LINE	1	0	0	0	-1	1	0	0	0	0	0	1	1	0	0	0	0	0	1	0	0	0	0	6	5	1	17
Tigger23a:TcMar-Tigger:DNA	1	0	0	0	-1	1	0	0	0	0	0	1	0	0	0	0	0	0	1	1	0	0	0	6	5	1	17
MER20:hAT-Charlie:DNA	0	0	0	0	-1	1	0	0	0	0	0	1	0	0	0	1	0	0	1	1	0	0	0	6	5	1	17
MER81:hAT-Blackjack:DNA	0	0	0	0	-1	1	0	0	0	0	0	1	1	0	0	0	0	0	1	1	0	0	0	6	5	1	17
AluSq2:Alu:SINE	0	0	0	0	-1	1	0	0	0	0	0	1	1	0	0	0	0	0	1	1	0	0	0	6	5	1	17
MSTD:ERVL-MaLR:LTR	0	0	0	0	-1	1	0	0	0	0	0	1	1	0	0	0	0	0	1	1	0	0	0	6	5	1	17
L1M8:L1:LINE	0	0	0	0	-1	1	0	0	0	0	0	1	1	0	0	0	0	0	1	1	0	0	0	6	5	1	17
L1MC:L1:LINE	0	0	0	0	-1	1	-1	0	0	0	0	1	1	0	0	0	0	0	1	0	1	0	0	7	5	2	16
L1P2:L1:LINE	0	0	0	0	-1	1	-1	0	0	0	0	1	1	0	0	0	0	0	1	1	0	0	0	7	5	2	16
LTR19C:ERV1:LTR	0	0	0	0	-1	1	1	0	0	0	0	1	0	0	0	0	0	0	1	1	0	0	0	6	5	1	17
UCON55:TcMar-Tigger:DNA	1	0	0	0	-1	1	0	0	0	0	0	1	0	0	0	0	0	0	1	1	0	0	0	6	5	1	17
HERV3-int:ERV1:LTR	0	0	0	0	-1	0	0	0	0	0	0	1	1	0	0	0	0	0	1	1	1	0	0	6	5	1	17
L1PB4:L1:LINE	0	0	0	0	-1	1	0	0	0	0	0	1	1	0	0	0	0	0	1	1	0	0	0	6	5	1	17
LFSINE_Vert:tRNA:SINE	1	0	0	0	-1	1	0	0	0	0	0	1	0	0	0	0	0	0	1	1	0	0	0	6	5	1	17
MamGypLTR2b:Gypsy:LTR	0	0	0	0	-1	0	0	0	0	0	0	1	1	0	0	0	0	0	1	1	1	0	0	6	5	1	17
hAT-5_Mam:hAT-Tag1:DNA	1	0	0	0	-1	1	0	0	0	-1	0	1	0	0	0	0	0	0	1	1	-1	0	0	8	5	3	15
Tigger3:TcMar-Tigger:DNA	1	0	0	0	-1	1	0	0	0	0	0	1	0	0	0	0	0	0	1	1	0	0	0	6	5	1	17
FRAM:Alu:SINE	1	0	0	0	-1	1	0	0	0	0	0	1	1	0	0	0	0	0	1	0	0	0	0	6	5	1	17
L1M3a:L1:LINE	-1	0	0	0	-1	-1	0	0	0	0	0	1	0	0	0	-1	1	0	1	1	0	1	0	9	5	4	14
Charlie2a:hAT-Charlie:DNA	1	0	0	0	-1	1	0	0	0	0	0	1	0	0	0	0	0	0	1	1	0	0	0	6	5	1	17
MER34:ERV1:LTR	0	0	0	0	-1	1	0	0	0	0	0	1	1	0	0	0	0	0	1	1	0	0	0	6	5	1	17
MLT1G:ERVL-MaLR:LTR	0	0	0	0	-1	1	0	0	0	0	0	1	1	0	0	0	0	0	1	1	0	0	0	6	5	1	17
LTR6A:ERV1:LTR	-1	1	0	0	0	0	0	0	0	0	-1	1	1	0	0	-1	0	0	1	1	0	0	0	8	5	3	15
FLAM_C:Alu:SINE	1	0	0	0	-1	0	0	0	0	0	0	1	1	0	0	0	0	0	1	1	0	0	0	6	5	1	17
tRNA-Asp-GAY:tRNA:tRNA	0	1	0	0	0	0	0	0	0	0	0	1	1	0	0	0	0	0	0	1	0	0	1	5	5	0	18
L1MCc:L1:LINE	0	0	0	0	-1	1	0	0	0	0	0	1	1	0	0	0	0	0	1	1	0	0	0	6	5	1	17
AluY:Alu:SINE	0	0	0	0	-1	1	0	0	0	0	0	1	1	0	0	0	0	0	1	1	0	0	0	6	5	1	17
ERVL-int:ERVL:LTR	0	1	0	0	-1	0	0	0	0	0	0	1	0	0	0	0	0	0	1	1	0	0	1	6	5	1	17
L5:RTE-X:LINE	0	0	0	0	-1	1	0	0	0	0	0	1	0	0	0	0	0	0	1	1	1	0	0	6	5	1	17
Eutr16:hAT-Tip100?:DNA?	0	0	0	0	0	1	0	0	0	0	0	1	0	0	0	0	0	0	1	1	1	0	0	5	5	0	18
AluSg:Alu:SINE	0	0	0	0	-1	1	0	0	0	0	0	1	1	0	0	0	0	0	1	1	0	0	0	6	5	1	17
L1MEb:L1:LINE	0	0	0	0	-1	1	-1	0	0	0	0	1	1	0	0	0	0	0	1	1	0	0	0	7	5	2	16
MER21-int:ERVL:LTR	0	0	0	0	-1	1	0	0	0	0	0	1	1	0	0	0	0	0	1	1	0	0	0	6	5	1	17
Tigger12c:TcMar-Tigger:DNA	1	0	0	0	-1	0	0	0	0	0	0	1	1	0	0	0	0	0	1	1	0	0	0	6	5	1	17
LTR16A:ERVL:LTR	0	0	0	0	-1	1	-1	0	0	0	0	1	1	0	0	0	0	0	1	1	0	0	0	7	5	2	16
AluSq:Alu:SINE	0	0	0	0	-1	1	0	0	0	0	0	1	1	0	0	0	0	0	1	1	0	0	0	6	5	1	17
X9a_DNA:DNA:DNA	1	0	0	0	-1	1	0	0	0	0	0	1	0	0	0	0	0	0	1	1	0	0	0	6	5	1	17
MLT1J2:ERVL-MaLR:LTR	0	0	0	0	-1	1	0	0	0	0	0	1	1	0	0	0	0	0	1	1	0	0	0	6	5	1	17
tRNA-Lys-AAA:tRNA:tRNA	0	1	0	0	0	0	0	0	0	0	0	1	1	0	0	0	0	0	1	1	0	0	0	5	5	0	18
SVA_A:SVA:Retroposon	0	0	0	0	-1	1	0	0	0	0	0	1	1	0	0	0	0	0	1	1	0	0	0	6	5	1	17
THE1C:ERVL-MaLR:LTR	0	0	0	0	-1	1	0	0	0	0	0	1	1	0	0	0	0	0	1	1	0	-1	0	7	5	2	16
L1PA3:L1:LINE	0	0	0	0	-1	1	0	0	0	0	-1	1	0	0	0	0	0	0	1	1	0	1	0	7	5	2	16
MLT1K:ERVL-MaLR:LTR	0	0	0	0	-1	1	0	0	0	0	0	1	1	0	0	0	0	0	1	1	0	0	0	6	5	1	17
AluSx:Alu:SINE	0	0	0	0	-1	1	0	0	0	0	0	1	1	0	0	0	0	0	1	1	0	0	0	6	5	1	17
MLT1D:ERVL-MaLR:LTR	0	0	0	0	-1	1	0	0	0	0	0	1	1	0	0	0	0	0	1	1	0	0	0	6	5	1	17
MER57B2:ERV1:LTR	-1	0	0	0	-1	1	0	0	0	0	0	1	1	0	0	0	0	0	1	1	0	0	0	7	5	2	16
AluSc:Alu:SINE	0	0	0	0	-1	1	0	0	0	0	0	1	1	0	0	0	0	0	1	1	0	0	0	6	5	1	17
LTR10G:ERV1:LTR	0	1	0	0	0	-1	0	0	1	0	0	1	0	0	0	0	0	0	1	1	-1	0	0	7	5	2	16
MLT1J-int:ERVL-MaLR:LTR	1	0	0	0	-1	0	0	0	0	0	0	1	0	0	0	1	0	0	1	1	0	0	0	6	5	1	17
MER54A:ERVL:LTR	0	0	-1	0	0	1	0	0	0	0	0	1	1	0	0	0	0	0	1	1	0	0	0	6	5	1	17
Eutr18:LTR?:LTR?	0	0	0	0	-1	1	0	0	0	0	0	1	1	0	0	0	0	0	1	1	0	0	0	6	5	1	17
MLT1J1-int:ERVL-MaLR:LTR	0	0	0	0	-1	1	0	1	0	0	0	1	1	0	0	0	0	0	1	0	0	0	0	6	5	1	17
MLT1H1:ERVL-MaLR:LTR	0	0	0	0	-1	1	1	0	0	0	0	1	0	0	0	0	0	0	1	1	0	0	0	6	5	1	17
LTR1F1:ERV1:LTR	0	0	0	0	-1	1	0	0	0	0	1	1	0	0	0	0	0	0	1	1	0	0	0	6	5	1	17
MER65C:ERV1:LTR	0	0	0	0	-1	0	0	0	0	0	1	1	1	0	0	0	0	0	1	1	0	0	0	6	5	1	17
MER47B:TcMar-Tigger:DNA	0	0	0	0	-1	1	0	0	0	0	0	1	1	0	0	0	0	0	1	1	0	0	0	6	5	1	17
L1ME4a:L1:LINE	1	0	0	0	-1	1	0	0	0	0	0	1	0	0	0	0	0	0	1	1	0	0	0	6	5	1	17
LTR8:ERV1:LTR	0	0	0	0	-1	1	0	0	0	0	0	1	1	0	0	0	0	0	1	0	1	0	0	6	5	1	17
LTR14B:ERVK:LTR	1	0	0	0	-1	-1	0	0	0	0	0	1	1	0	0	0	1	0	1	0	0	0	0	7	5	2	16
MLT1B-int:ERVL-MaLR:LTR	1	1	0	0	-1	1	0	0	0	0	0	1	0	0	0	0	0	0	1	-1	0	0	0	7	5	2	16
MER4B-int:ERV1:LTR	0	0	0	0	-1	0	0	0	0	0	0	1	1	0	0	1	0	0	1	0	1	0	0	6	5	1	17
LTR10E:ERV1:LTR	0	1	0	0	-1	1	0	0	0	0	-1	1	0	0	0	0	0	0	1	1	0	0	0	7	5	2	16
X5a_DNA:TcMar:DNA	1	0	0	0	-1	0	0	0	0	0	0	1	0	0	0	1	0	0	1	1	0	0	0	6	5	1	17
L1MA4A:L1:LINE	0	0	0	0	-1	1	-1	0	0	0	0	1	1	0	0	0	0	0	1	1	0	0	0	7	5	2	16
AluJb:Alu:SINE	0	0	0	0	-1	1	0	0	0	0	0	1	1	0	0	0	0	0	1	1	0	0	0	6	5	1	17
MER44D:TcMar-Tigger:DNA	0	0	0	0	-1	1	0	0	0	0	0	1	1	0	0	0	0	0	1	1	0	0	0	6	5	1	17
MLT1F2:ERVL-MaLR:LTR	0	0	0	0	-1	1	0	0	0	0	0	1	1	0	0	0	0	0	1	1	0	0	0	6	5	1	17
HAL1:L1:LINE	0	0	0	0	-1	1	0	0	0	0	0	1	1	0	0	0	0	0	1	1	0	0	0	6	5	1	17
MLT2B1:ERVL:LTR	0	0	0	0	-1	1	-1	0	0	0	0	1	1	0	0	0	0	0	1	1	0	0	0	7	5	2	16
MLT1C2:ERVL-MaLR:LTR	0	0	0	0	-1	1	0	0	0	0	0	1	1	0	0	0	0	0	1	1	0	0	0	6	5	1	17
L1MA5A:L1:LINE	0	0	0	0	-1	1	0	0	0	0	0	1	1	0	0	0	0	0	1	1	0	0	0	6	5	1	17
MER115:hAT-Tip100:DNA	0	0	0	0	-1	1	0	0	0	0	0	1	1	0	0	0	0	0	1	1	0	0	0	6	5	1	17
MER11B:ERVK:LTR	0	0	0	0	-1	1	0	0	0	0	0	1	0	0	0	0	0	0	1	1	0	1	0	6	5	1	17
UCON6:Unknown:Unknown	0	1	0	0	0	0	0	0	0	0	0	1	0	0	0	1	0	0	1	1	-1	0	0	6	5	1	17
LTR16B2:ERVL:LTR	0	0	0	0	0	1	0	0	0	0	0	1	1	0	0	0	0	0	1	1	0	0	0	5	5	0	18
L1MD1:L1:LINE	0	0	0	0	-1	1	0	0	0	0	0	1	1	0	0	0	0	0	1	1	0	0	0	6	5	1	17
HERV9NC-int:ERV1:LTR	0	0	0	0	-1	0	-1	1	0	0	0	1	1	0	0	0	0	0	1	1	0	0	0	7	5	2	16
LOR1b:ERV1:LTR	0	0	0	0	-1	1	0	0	0	0	0	1	0	0	0	0	0	0	1	1	1	0	0	6	5	1	17
BSR/Beta:Satellite:Satellite	-1	-1	0	0	-1	-1	-1	0	0	1	0	1	0	0	-1	0	1	0	1	1	0	0	0	11	5	6	12
Tigger13a:TcMar-Tigger:DNA	1	0	0	0	-1	1	0	0	0	0	0	1	0	0	0	0	0	0	1	1	0	0	0	6	5	1	17
AluYa5:Alu:SINE	0	0	0	0	-1	1	0	0	0	0	0	1	1	0	0	0	0	0	1	0	0	1	0	6	5	1	17
L1ME1:L1:LINE	1	0	0	0	-1	1	0	0	0	0	0	1	0	0	0	0	0	0	1	1	0	0	0	6	5	1	17
MER5A:hAT-Charlie:DNA	0	0	0	0	-1	1	0	0	0	0	0	1	1	0	0	0	0	0	1	1	0	0	0	6	5	1	17
MIRc:MIR:SINE	1	0	0	0	-1	1	0	0	0	0	0	1	0	0	0	0	0	0	1	1	0	0	0	6	5	1	17
X6b_DNA:TcMar-Tigger:DNA	1	0	0	0	-1	1	0	0	0	0	0	1	0	0	0	0	0	0	1	1	0	0	0	6	5	1	17
HERV9-int:ERV1:LTR	0	0	0	0	-1	1	0	1	0	0	0	1	1	0	0	0	0	0	1	-1	0	0	0	7	5	2	16
L1M1:L1:LINE	0	0	0	0	-1	1	-1	0	0	0	0	1	1	0	0	0	0	0	1	1	0	0	0	7	5	2	16
FAM:Alu:SINE	0	0	0	0	0	-1	0	0	0	0	0	1	0	0	0	1	0	0	1	1	1	0	0	6	5	1	17
MLT1C:ERVL-MaLR:LTR	0	0	0	0	-1	1	0	0	0	0	0	1	0	0	0	1	0	0	1	1	0	0	0	6	5	1	17
LTR89B:ERVL?:LTR	1	0	0	0	-1	1	-1	0	0	0	0	1	0	0	0	0	0	0	1	1	0	0	0	7	5	2	16
LTR10C:ERV1:LTR	0	0	0	0	-1	1	-1	1	0	0	-1	1	1	0	0	0	0	0	1	0	0	0	0	8	5	3	15
Zaphod4a:hAT-Tip100:DNA	0	1	0	0	0	0	1	0	0	0	0	1	0	0	0	0	0	0	1	1	0	0	0	5	5	0	18
LTR2:ERV1:LTR	0	0	0	0	0	1	0	0	0	0	0	1	1	0	0	0	0	0	1	0	1	0	0	5	5	0	18
HERVL-int:ERVL:LTR	0	0	-1	0	-1	1	0	0	0	0	0	1	1	0	0	0	1	0	1	0	0	0	0	7	5	2	16
MARNA:TcMar-Mariner:DNA	1	0	0	0	-1	1	0	0	0	0	0	1	0	0	0	0	0	0	1	1	0	0	0	6	5	1	17
LTR47A:ERVL:LTR	1	1	0	0	-1	0	0	0	0	0	0	1	0	0	0	0	0	0	1	1	0	0	0	6	5	1	17
MamRep434:TcMar-Tigger:DNA	0	0	0	0	-1	1	0	0	0	0	0	1	1	0	0	0	0	0	1	1	0	0	0	6	5	1	17
AluSq4:Alu:SINE	0	0	0	0	-1	1	0	0	0	0	0	1	1	0	0	0	0	0	1	1	0	0	0	6	5	1	17
MER68B:ERVL:LTR	1	0	0	0	-1	0	1	0	0	0	0	1	0	0	0	0	0	0	1	1	0	0	0	6	5	1	17
LTR45C:ERV1:LTR	0	1	0	0	0	1	0	0	0	0	0	1	0	0	0	0	1	0	1	0	0	0	0	5	5	0	18
AluYh7:Alu:SINE	0	0	0	0	-1	1	0	0	0	0	0	1	1	0	0	0	0	0	1	1	0	0	0	6	5	1	17
MER4C:ERV1:LTR	0	0	0	0	-1	1	0	0	0	0	-1	1	1	0	0	0	0	0	1	1	0	0	0	7	5	2	16
MER135:DNA:DNA	1	0	0	0	-1	1	0	0	0	0	0	1	0	0	0	1	0	0	1	0	-1	0	0	7	5	2	16
MSTB:ERVL-MaLR:LTR	0	0	0	0	-1	1	-1	0	0	0	0	1	1	0	0	0	0	0	1	1	0	0	0	7	5	2	16
LTR7:ERV1:LTR	0	1	0	0	0	0	0	0	0	0	0	1	0	0	0	0	0	0	1	1	1	0	0	5	5	0	18
L1MC3:L1:LINE	0	0	0	0	-1	1	0	0	0	0	0	1	1	0	0	0	0	0	1	1	0	0	0	6	5	1	17
MER57C2:ERV1:LTR	0	0	0	0	-1	1	0	0	0	0	-1	1	1	0	0	0	0	0	1	1	0	0	0	7	5	2	16
L1M3c:L1:LINE	0	0	0	0	-1	0	0	0	0	0	0	1	1	0	0	0	0	0	1	1	0	0	1	6	5	1	17
Tigger2:TcMar-Tigger:DNA	1	0	0	0	-1	0	0	0	0	0	0	1	1	0	0	0	0	0	1	1	0	0	0	6	5	1	17
AluSg4:Alu:SINE	0	0	0	0	-1	1	0	0	0	0	0	1	1	0	0	0	0	0	1	0	0	1	0	6	5	1	17
AluSx4:Alu:SINE	0	0	0	0	-1	1	0	0	0	0	0	1	1	0	0	0	0	0	1	1	0	0	0	6	5	1	17
L1PB2:L1:LINE	0	0	0	0	-1	1	-1	0	0	0	0	1	1	0	0	0	0	0	1	1	0	0	0	7	5	2	16
MLT1A0:ERVL-MaLR:LTR	0	0	0	0	-1	1	0	0	0	0	0	1	1	0	0	0	0	0	1	1	0	0	0	6	5	1	17
LTR91:LTR:LTR	1	0	0	0	-1	0	0	0	0	0	0	1	1	0	0	0	0	0	1	0	1	0	0	6	5	1	17
MamRTE1:RTE-BovB:LINE	1	0	0	0	-1	1	0	0	0	0	0	1	0	0	0	0	0	0	1	1	0	0	0	6	5	1	17
LTR26C:ERV1:LTR	0	0	0	0	0	1	0	0	0	0	0	1	0	0	0	1	0	0	1	1	0	0	0	5	5	0	18
L1ME3F:L1:LINE	0	0	0	0	-1	1	0	0	0	0	0	1	1	0	0	0	0	0	1	1	0	0	0	6	5	1	17
L1PA2:L1:LINE	0	0	0	0	-1	1	0	0	0	0	-1	1	0	0	0	0	0	0	1	1	0	1	0	7	5	2	16
L1PB1:L1:LINE	0	0	0	0	-1	1	0	0	0	0	0	1	0	0	0	0	0	0	1	1	0	1	0	6	5	1	17
PRIMA4-int:ERV1:LTR	0	0	0	0	-1	1	0	0	0	0	0	1	0	0	0	0	1	0	1	1	0	0	0	6	5	1	17
L1PA4:L1:LINE	0	0	0	0	-1	1	0	0	0	0	-1	1	0	0	0	0	0	0	1	1	0	1	0	7	5	2	16
LTR40a:ERVL:LTR	0	0	0	0	-1	1	0	0	0	0	0	1	1	0	0	0	0	0	1	1	0	0	0	6	5	1	17
Charlie3:hAT-Charlie:DNA	0	0	0	0	-1	1	0	0	0	0	0	1	0	0	0	0	1	0	1	1	0	0	0	6	5	1	17
AluJo:Alu:SINE	0	0	0	0	-1	1	0	0	0	0	0	1	1	0	0	0	0	0	1	1	0	0	0	6	5	1	17
Eutr2:DNA:DNA	0	1	0	0	-1	1	0	0	0	0	0	1	0	0	0	0	0	0	1	1	0	0	0	6	5	1	17
MER66D:ERV1:LTR	0	1	-1	0	-1	1	0	0	0	0	0	1	0	0	0	0	0	0	1	1	0	0	0	7	5	2	16
HUERS-P3-int:ERV1:LTR	0	1	0	0	-1	1	0	0	0	0	0	1	1	0	0	0	0	0	1	-1	0	0	0	7	5	2	16
ERVL-E-int:ERVL:LTR	0	0	0	0	-1	0	1	0	0	0	0	1	1	0	0	0	0	0	1	1	0	0	0	6	5	1	17
LTR84b:ERVL:LTR	0	0	0	0	-1	1	0	0	0	0	0	1	1	0	0	0	0	0	1	1	0	0	0	6	5	1	17
MER68-int:ERVL:LTR	0	0	0	0	-1	0	0	0	0	0	0	1	1	0	0	1	0	0	1	1	0	0	0	6	5	1	17
MER91A:hAT-Tip100:DNA	0	0	0	0	-1	1	0	0	0	0	0	1	1	0	0	0	0	0	1	1	0	0	0	6	5	1	17
L1MA4:L1:LINE	0	0	0	0	-1	1	0	0	0	0	0	1	1	0	0	0	0	0	1	1	0	0	0	6	5	1	17
Charlie5:hAT-Charlie:DNA	0	0	0	0	-1	1	0	0	0	0	0	1	1	0	0	0	0	0	1	1	0	0	0	6	5	1	17
L1MA1:L1:LINE	0	0	0	0	-1	1	-1	0	0	0	-1	1	1	0	0	0	0	0	1	1	0	0	0	8	5	3	15
MLT1J2-int:ERVL-MaLR:LTR	0	1	1	0	-1	1	-1	0	0	0	0	1	0	0	0	0	0	0	1	0	0	0	0	7	5	2	16
Charlie29a:hAT-Charlie:DNA	1	0	0	0	-1	0	0	0	0	0	0	1	0	0	0	0	1	0	1	1	-1	0	0	7	5	2	16
THE1D:ERVL-MaLR:LTR	0	0	0	0	-1	1	0	0	0	0	0	1	1	0	0	0	0	0	1	1	0	-1	0	7	5	2	16
MLT2B3:ERVL:LTR	1	0	0	0	-1	1	-1	0	0	0	0	1	0	0	0	0	0	0	1	1	0	0	0	7	5	2	16
MER4A1:ERV1:LTR	0	0	0	0	-1	0	0	0	0	0	0	1	1	0	0	0	0	0	1	1	1	-1	0	7	5	2	16
Charlie8:hAT-Charlie:DNA	0	0	0	0	-1	1	0	0	0	0	0	1	1	0	0	0	0	0	1	1	0	0	0	6	5	1	17
MLT1M:ERVL-MaLR:LTR	0	0	0	0	-1	0	0	0	0	0	0	1	1	0	0	0	0	0	1	1	0	1	0	6	5	1	17
HUERS-P3b-int:ERV1:LTR	0	0	0	0	-1	1	0	0	0	0	-1	1	0	0	0	1	0	0	1	1	0	0	0	7	5	2	16
L1MCb:L1:LINE	0	0	0	0	0	1	-1	0	0	0	0	1	1	0	0	0	0	0	1	1	0	0	0	6	5	1	17
MER31A:ERV1:LTR	0	0	0	0	-1	1	0	0	0	0	0	1	1	0	0	0	0	0	1	1	0	0	0	6	5	1	17
Tigger15a:TcMar-Tigger:DNA	1	0	0	0	-1	1	0	0	0	0	0	1	0	0	0	0	0	0	1	1	0	0	0	6	5	1	17
L1PA8:L1:LINE	0	0	0	0	-1	1	0	0	0	0	0	1	0	0	0	0	0	0	1	1	1	0	0	6	5	1	17
LTR36:ERV1:LTR	0	1	0	0	-1	1	0	0	0	0	-1	1	0	0	0	0	0	0	1	1	0	0	0	7	5	2	16
MER34A:ERV1:LTR	1	0	0	0	-1	1	0	0	0	0	0	1	0	0	0	0	0	0	1	1	0	0	0	6	5	1	17
MLT1G-int:ERVL-MaLR:LTR	0	0	0	0	-1	1	0	0	0	0	-1	1	0	0	0	1	0	0	1	1	0	0	0	7	5	2	16
HUERS-P2-int:ERV1:LTR	0	0	0	0	-1	0	-1	0	0	0	0	1	0	0	0	1	0	0	1	1	0	0	1	7	5	2	16
MER20B:hAT-Charlie:DNA	0	0	0	0	-1	1	0	0	0	0	0	1	0	0	0	1	0	0	1	1	0	0	0	6	5	1	17
MER4B:ERV1:LTR	0	0	0	0	-1	0	0	0	0	0	0	1	1	0	0	1	0	0	1	1	0	0	0	6	5	1	17
L1PA11:L1:LINE	-1	0	0	0	-1	0	-1	0	0	0	0	1	0	0	0	0	1	0	1	1	0	1	0	8	5	3	15
LTR61:ERV1:LTR	0	1	0	0	0	0	0	-1	0	0	0	1	0	0	0	0	1	0	1	0	1	0	0	6	5	1	17
LTR106_Mam:LTR:LTR	0	0	0	0	-1	1	0	0	0	0	0	1	0	0	0	0	0	0	1	1	1	0	0	6	5	1	17
Alu:Alu:SINE	0	0	0	0	-1	0	0	0	0	0	1	1	1	0	0	0	0	0	1	1	0	0	0	6	5	1	17
MIR1_Amn:MIR:SINE	1	0	0	0	-1	1	0	0	0	0	0	1	0	0	0	0	0	0	1	1	0	0	0	6	5	1	17
MLT1B:ERVL-MaLR:LTR	0	0	-1	0	0	1	-1	0	0	0	0	1	1	0	0	0	0	0	1	1	0	0	0	7	5	2	16
MamGypLTR4:Gypsy:LTR	0	0	0	0	0	0	0	0	0	0	0	1	0	0	0	0	0	0	1	1	1	0	1	5	5	0	18
AluJr:Alu:SINE	0	0	0	0	-1	1	0	0	0	0	0	1	1	0	0	0	0	0	1	1	0	0	0	6	5	1	17
LTR1D:ERV1:LTR	0	0	0	0	-1	0	0	1	0	0	1	1	0	0	0	0	0	0	1	1	0	0	0	6	5	1	17
LTR16A1:ERVL:LTR	0	0	0	0	-1	1	0	0	0	0	0	1	1	0	0	0	0	0	1	1	0	0	0	6	5	1	17
AluYc3:Alu:SINE	1	0	0	0	-1	0	0	0	0	0	0	1	1	0	0	0	0	0	1	1	0	0	0	6	5	1	17
LTR66:ERVL:LTR	0	0	0	0	-1	-1	0	0	0	0	0	1	1	0	0	0	0	0	1	1	1	-1	0	8	5	3	15
LTR12F:ERV1:LTR	1	0	0	0	-1	1	0	0	0	0	0	1	1	0	0	0	0	0	1	0	0	0	0	6	5	1	17
MIR3:MIR:SINE	0	0	0	0	-1	1	0	0	0	0	0	1	1	0	0	0	0	0	1	1	0	0	0	6	5	1	17
L1ME3A:L1:LINE	1	0	0	0	-1	1	0	0	0	0	0	1	0	0	0	0	0	0	1	1	0	-1	0	7	5	2	16
LTR23-int:ERV1:LTR	-1	1	0	0	-1	0	1	0	0	0	0	1	0	0	0	0	0	0	1	1	0	0	0	7	5	2	16
AluYm1:Alu:SINE	0	0	0	0	-1	1	0	0	0	0	0	1	1	0	0	0	0	0	1	1	0	0	0	6	5	1	17
AluSg7:Alu:SINE	0	0	0	0	-1	1	0	0	0	0	0	1	1	0	0	0	0	0	1	1	0	0	0	6	5	1	17
AluSx3:Alu:SINE	0	0	0	0	-1	1	0	0	0	0	0	1	1	0	0	0	0	0	1	1	0	0	0	6	5	1	17
X7B_LINE:CR1:LINE	0	0	0	0	-1	1	0	0	0	0	0	1	1	0	0	0	0	0	1	1	0	0	0	6	5	1	17
X9b_DNA:TcMar-Tigger:DNA	0	0	0	0	0	0	0	0	0	0	0	1	1	0	0	1	0	0	1	1	-1	0	0	6	5	1	17
MSTB2:ERVL-MaLR:LTR	0	0	0	0	-1	1	0	0	0	0	0	1	1	0	0	0	0	0	1	1	0	0	0	6	5	1	17
AluYk3:Alu:SINE	0	0	0	0	-1	1	0	0	0	0	0	1	1	0	0	0	0	0	1	1	0	0	0	6	5	1	17
REP522:telo:Satellite	0	0	0	0	-1	1	0	0	0	0	0	1	0	0	0	1	0	0	1	1	0	0	0	6	5	1	17
Tigger6a:TcMar-Tigger:DNA	1	0	0	0	-1	0	0	0	0	0	0	1	1	0	0	0	0	0	1	1	0	0	0	6	5	1	17
THE1D-int:ERVL-MaLR:LTR	1	0	0	0	-1	0	0	0	0	0	0	1	1	0	0	0	0	0	1	1	0	0	0	6	5	1	17
MER107:hAT-Charlie:DNA	0	0	0	0	0	-1	0	0	0	0	0	1	1	0	0	1	0	0	1	1	0	0	0	6	5	1	17
MER84-int:ERV1:LTR	0	0	0	1	0	1	0	0	0	0	0	1	0	0	0	0	0	0	1	0	0	0	1	5	5	0	18
Charlie15a:hAT-Charlie:DNA	1	0	0	0	-1	1	0	0	0	0	-1	1	0	0	0	0	0	0	1	1	0	0	0	7	5	2	16
LTR33A:ERVL:LTR	0	0	0	0	-1	1	0	0	0	0	0	1	1	0	0	1	0	0	1	0	0	0	0	6	5	1	17
LTR3A:ERVK:LTR	0	1	0	0	-1	0	0	0	0	0	0	1	1	0	0	0	0	0	1	1	0	0	0	6	5	1	17
Eutr2B:DNA:DNA	1	0	0	0	-1	0	0	0	0	0	0	1	0	0	0	1	0	0	1	1	0	-1	0	7	5	2	16
MER41-int:ERV1:LTR	0	0	0	0	-1	1	0	0	0	0	0	1	1	0	0	0	0	0	1	1	0	0	0	6	5	1	17
tRNA-Gly-GGA:tRNA:tRNA	0	1	0	0	0	0	0	0	0	0	0	1	1	0	0	0	0	0	1	1	0	0	0	5	5	0	18
L1MC1:L1:LINE	0	0	0	0	-1	1	0	0	0	0	0	1	1	0	0	0	0	0	1	1	0	0	0	6	5	1	17
AluSz6:Alu:SINE	0	0	0	0	-1	1	0	0	0	0	0	1	1	0	0	0	0	0	1	1	0	0	0	6	5	1	17
LTR9:ERV1:LTR	0	0	0	0	-1	1	-1	0	0	0	0	1	1	0	0	0	0	0	1	1	0	0	0	7	5	2	16
MER63B:hAT-Blackjack:DNA	0	0	0	0	-1	1	0	0	0	0	0	1	1	0	0	0	0	0	1	1	0	0	0	6	5	1	17
HERV1_I-int:ERV1:LTR	0	1	0	0	-1	0	0	0	0	0	0	1	0	0	0	1	0	0	1	1	0	0	0	6	5	1	17
ERVL-B4-int:ERVL:LTR	0	0	0	0	-1	1	-1	0	0	0	1	1	1	0	0	0	0	0	1	0	0	0	0	7	5	2	16
MSTD-int:ERVL-MaLR:LTR	0	0	0	0	-1	1	0	0	0	0	0	1	1	0	0	0	0	0	1	1	0	0	0	6	5	1	17
Ricksha_c:MULE-MuDR:DNA	0	0	0	0	-1	0	-1	0	0	0	1	1	1	0	0	0	0	0	1	1	0	0	0	7	5	2	16
MSTC:ERVL-MaLR:LTR	0	0	0	0	-1	1	0	0	0	0	0	1	1	0	0	0	0	0	1	1	0	0	0	6	5	1	17
L1MB5:L1:LINE	1	0	0	0	-1	1	0	0	0	0	-1	1	0	0	0	0	0	0	1	1	0	0	0	7	5	2	16
X26_DNA:TcMar-Tigger:DNA	1	0	0	0	-1	1	0	0	0	0	-1	1	0	0	0	0	0	0	1	1	0	0	0	7	5	2	16
L1PA6:L1:LINE	0	0	0	0	-1	1	0	0	0	0	-1	1	0	0	0	0	0	0	1	1	0	1	0	7	5	2	16
MamRep4096:hAT-Tip100:DNA	0	0	0	0	-1	1	0	0	0	0	0	1	0	0	0	1	0	0	1	1	0	0	0	6	5	1	17
MER51D:ERV1:LTR	0	0	0	0	-1	1	0	1	0	0	0	1	0	0	0	0	0	0	1	-1	0	1	0	7	5	2	16
L1PREC2:L1:LINE	0	0	0	0	-1	1	-1	0	0	0	0	1	1	0	0	0	0	0	1	0	0	1	0	7	5	2	16
LTR1B0:ERV1:LTR	0	0	0	0	0	1	0	0	0	0	1	1	0	0	0	0	0	0	1	1	0	0	0	5	5	0	18
HERV17-int:ERV1:LTR	0	0	0	0	-1	0	0	0	0	0	0	1	1	0	0	0	1	0	1	1	0	0	0	6	5	1	17
MER6A:TcMar-Tigger:DNA	0	1	0	0	-1	1	0	0	0	0	0	1	0	0	0	0	0	0	1	1	0	0	0	6	5	1	17
MLT2B2:ERVL:LTR	0	0	0	0	-1	1	-1	0	0	0	0	1	1	0	0	0	0	0	1	1	0	0	0	7	5	2	16
THE1A-int:ERVL-MaLR:LTR	1	0	0	0	-1	1	0	0	0	0	0	1	0	0	0	0	0	0	1	1	0	0	0	6	5	1	17
LTR49-int:ERV1:LTR	0	1	0	0	-1	1	0	0	0	0	0	1	1	0	0	0	0	0	1	0	0	0	0	6	5	1	17
MER4D:ERV1:LTR	0	0	0	0	0	1	-1	0	0	0	0	1	1	0	0	0	0	0	1	1	0	0	0	6	5	1	17
Mam_R4:Dong-R4:LINE	1	0	0	0	0	1	0	0	0	0	0	1	0	0	0	1	0	0	1	0	0	0	0	5	5	0	18
LTR17:ERV1:LTR	0	0	0	0	-1	0	-1	0	0	0	0	1	1	0	0	0	1	0	1	1	0	0	0	7	5	2	16
L1MEc:L1:LINE	0	0	0	0	-1	1	0	0	0	0	0	1	1	0	0	0	0	0	1	1	0	0	0	6	5	1	17
AluYj4:Alu:SINE	0	0	0	0	-1	1	0	0	0	0	0	1	1	0	0	0	0	0	1	1	0	0	0	6	5	1	17
AluSx1:Alu:SINE	0	0	0	0	-1	1	0	0	0	0	0	1	1	0	0	0	0	0	1	1	0	0	0	6	5	1	17
AluSc5:Alu:SINE	0	0	0	0	-1	1	0	0	0	0	0	1	1	0	0	0	0	0	1	1	0	0	0	6	5	1	17
MLT1F:ERVL-MaLR:LTR	0	0	0	0	-1	1	0	0	0	0	0	1	1	0	0	0	0	0	1	1	0	0	0	6	5	1	17
MER39:ERV1:LTR	0	0	0	0	-1	1	-1	0	0	0	0	1	1	0	0	0	0	0	1	1	0	0	0	7	5	2	16
Tigger9a:TcMar-Tigger:DNA	0	0	0	0	-1	1	0	0	0	0	0	1	1	0	0	0	0	0	1	1	0	0	0	6	5	1	17
LTR06:ERV1:LTR	0	0	0	0	0	1	0	1	0	0	0	1	0	0	0	0	0	0	1	1	0	0	0	5	5	0	18
SVA_C:SVA:Retroposon	0	0	0	0	-1	1	0	0	0	-1	0	1	1	0	0	0	0	0	1	1	0	0	0	7	5	2	16
MER34B-int:ERV1:LTR	1	-1	0	0	-1	1	0	0	0	0	0	1	0	0	0	0	0	0	1	1	0	0	0	7	5	2	16
MER90:ERV1:LTR	1	0	0	0	-1	1	0	0	0	0	0	1	0	0	0	0	0	0	1	1	0	0	0	6	5	1	17
UCON41:Unknown:Unknown	0	0	0	0	-1	1	0	0	0	0	0	1	1	0	0	1	0	0	1	-1	0	0	0	7	5	2	16
LTR29:ERV1:LTR	0	1	0	0	-1	-1	0	0	0	0	0	1	0	0	0	1	0	0	1	0	1	0	0	7	5	2	16
L1MA3:L1:LINE	0	0	0	0	-1	1	-1	0	0	0	0	1	1	0	0	0	0	0	1	1	0	0	0	7	5	2	16
HERVK14-int:ERVK:LTR	1	0	0	0	-1	0	1	0	0	0	0	1	0	0	0	0	1	0	1	0	0	0	0	6	5	1	17
Charlie17:hAT-Charlie:DNA	0	1	0	0	-1	1	0	0	0	-1	0	1	0	0	0	0	0	0	1	1	0	0	0	7	5	2	16
L1MEi:L1:LINE	0	0	0	0	-1	1	0	0	0	0	0	1	1	0	0	0	0	0	1	1	0	0	0	6	5	1	17
MER61-int:ERV1:LTR	0	0	0	0	-1	1	-1	0	0	0	0	1	1	0	0	1	0	0	1	0	0	0	0	7	5	2	16
MER89:ERV1:LTR	0	1	0	0	-1	1	0	0	0	0	0	1	0	0	0	0	0	0	1	1	0	0	0	6	5	1	17
HERVS71-int:ERV1:LTR	1	0	0	0	0	0	0	0	0	0	0	1	1	0	0	0	1	0	1	-1	0	0	0	6	5	1	17
L1P1:L1:LINE	0	0	0	0	-1	1	0	0	0	0	-1	1	0	0	0	0	0	0	1	1	0	1	0	7	5	2	16
HERVIP10FH-int:ERV1:LTR	0	-1	0	0	0	1	-1	0	0	0	-1	0	0	0	0	0	0	0	1	1	1	1	0	8	5	3	15
MER58C:hAT-Charlie:DNA	1	0	0	0	-1	1	0	0	0	0	0	1	0	0	0	0	0	0	1	1	0	0	0	6	5	1	17
AluSp:Alu:SINE	0	0	0	0	-1	1	0	0	0	0	0	1	1	0	0	0	0	0	1	1	0	0	0	6	5	1	17
MER45R:hAT-Tip100:DNA	1	0	0	0	-1	0	0	0	0	0	0	1	0	0	0	0	0	0	1	1	1	0	0	6	5	1	17
LTR32:ERVL:LTR	0	0	0	0	-1	1	-1	0	0	0	0	1	1	0	0	0	0	0	1	1	0	0	0	7	5	2	16
X10b_DNA:TcMar-Tigger:DNA	1	0	0	0	-1	1	0	0	0	0	0	1	0	0	0	0	0	0	1	1	0	0	0	6	5	1	17
MLT2F:ERVL:LTR	0	0	0	0	-1	-1	0	0	0	0	0	1	1	0	0	0	1	0	1	1	0	0	0	7	5	2	16
MER58D:hAT-Charlie:DNA	0	0	0	0	-1	1	0	1	0	0	-1	1	0	0	0	0	0	0	1	1	0	0	0	7	5	2	16
MLT2D:ERVL:LTR	1	0	0	0	-1	0	0	0	0	0	0	1	1	0	0	0	0	0	1	1	0	0	0	6	5	1	17
MLT1G3:ERVL-MaLR:LTR	0	0	0	0	-1	1	0	0	0	0	0	1	1	0	0	0	0	0	1	1	0	0	0	6	5	1	17
MER30:hAT-Charlie:DNA	0	0	0	0	-1	1	1	0	0	0	0	1	0	0	0	0	0	0	1	1	0	0	0	6	5	1	17
MER65-int:ERV1:LTR	0	0	0	0	-1	1	-1	0	0	0	0	1	1	0	0	0	0	0	1	1	0	0	0	7	5	2	16
L1MEf:L1:LINE	1	0	0	0	-1	1	0	0	0	0	0	1	0	0	0	0	0	0	1	1	0	0	0	6	5	1	17
MER4CL34:ERV1:LTR	0	1	0	0	-1	1	0	0	0	0	0	1	1	0	0	0	0	0	1	0	0	0	0	6	5	1	17
MER6:TcMar-Tigger:DNA	1	0	0	0	-1	1	0	0	0	0	0	1	0	0	0	0	0	0	1	1	0	0	0	6	5	1	17
MLT1A1:ERVL-MaLR:LTR	0	0	0	0	-1	1	-1	0	0	0	0	1	1	0	0	0	0	0	1	1	0	0	0	7	5	2	16
L1ME4b:L1:LINE	1	0	0	0	-1	1	0	0	0	0	0	1	0	0	0	0	0	0	1	1	0	0	0	6	5	1	17
LTR5_Hs:ERVK:LTR	0	0	1	0	-1	0	0	0	0	0	0	1	0	0	0	0	0	1	1	1	0	0	0	6	5	1	17
MER57E1:ERV1:LTR	0	0	0	0	-1	1	1	0	0	0	-1	1	0	0	0	0	0	0	1	1	0	0	0	7	5	2	16
L1ME3E:L1:LINE	1	0	0	0	-1	1	0	0	0	0	0	1	0	0	0	0	0	0	1	1	0	0	0	6	5	1	17
HERVKC4-int:ERVK:LTR	-1	1	0	0	0	1	0	0	0	0	0	1	0	0	0	0	0	0	1	1	0	0	0	6	5	1	17
L1M3de:L1:LINE	0	0	0	0	-1	1	-1	0	0	0	0	1	0	0	0	1	0	0	1	1	0	0	0	7	5	2	16
SATR2:Satellite:Satellite	0	0	0	0	-1	-1	0	0	0	0	0	1	1	0	0	0	0	0	1	-1	1	0	1	8	5	3	15
HUERS-P1-int:ERV1:LTR	0	0	0	0	-1	1	0	0	0	0	0	1	1	0	0	0	0	0	1	1	0	0	0	6	5	1	17
SVA_B:SVA:Retroposon	0	0	0	0	-1	1	0	0	0	-1	0	1	1	0	0	0	0	0	1	1	0	0	0	7	5	2	16
MLT2C1:ERVL:LTR	0	0	0	0	-1	1	0	0	0	0	0	1	1	0	0	0	0	0	1	1	0	0	0	6	5	1	17
AluSc8:Alu:SINE	0	0	0	0	-1	1	0	0	0	0	0	1	1	0	0	0	0	0	1	1	0	0	0	6	5	1	17
L3:CR1:LINE	1	0	0	0	-1	1	0	0	0	0	0	1	0	0	0	0	0	0	1	1	0	0	0	6	5	1	17
MLT2B4:ERVL:LTR	0	0	0	0	-1	1	0	0	0	0	0	1	1	0	0	0	0	0	1	0	0	1	0	6	5	1	17
L1PA15:L1:LINE	0	0	0	0	-1	1	-1	0	0	0	0	1	1	0	0	0	0	0	1	1	0	0	0	7	5	2	16
MSTB-int:ERVL-MaLR:LTR	0	0	0	0	-1	1	0	0	0	0	0	1	0	0	0	0	1	0	1	1	0	0	0	6	5	1	17
MER50:ERV1:LTR	0	0	-1	0	-1	1	0	0	0	0	0	1	1	0	0	0	0	0	1	1	0	0	0	7	5	2	16
THE1A:ERVL-MaLR:LTR	1	0	0	0	-1	1	0	0	0	0	0	1	0	0	0	0	0	0	1	1	0	0	0	6	5	1	17
MER50B:ERV1:LTR	0	0	0	0	-1	1	0	0	0	0	0	1	1	0	0	0	0	0	1	1	0	0	0	6	5	1	17
AluSq10:Alu:SINE	0	0	0	0	-1	1	0	0	0	0	0	1	1	0	0	0	0	0	1	1	0	0	0	6	5	1	17
HAL1ME:L1:LINE	0	0	0	0	-1	1	1	0	0	0	0	1	0	0	0	0	0	0	1	1	0	0	0	6	5	1	17
MLT1A:ERVL-MaLR:LTR	0	0	0	0	-1	1	0	0	0	0	0	1	1	0	0	0	0	0	1	1	0	0	0	6	5	1	17
LTR22A:ERVK:LTR	0	1	0	0	-1	1	0	0	0	0	0	1	0	0	0	0	0	0	1	1	0	0	0	6	5	1	17
HAL1M8:L1:LINE	1	0	0	0	-1	1	0	0	0	0	0	1	0	0	0	0	0	0	1	1	0	0	0	6	5	1	17
tRNA-Val-GTY:tRNA:tRNA	0	0	0	0	0	0	0	1	0	0	0	1	1	0	0	0	0	0	1	1	0	0	0	5	5	0	18
Eutr10:ERVL?:LTR	-1	0	0	0	-1	1	0	0	0	0	0	1	1	0	0	0	0	0	1	1	0	0	0	7	5	2	16
MLT1F1:ERVL-MaLR:LTR	0	0	0	0	-1	1	0	0	0	0	0	1	1	0	0	0	0	0	1	1	0	0	0	6	5	1	17
L1MC4a:L1:LINE	0	0	0	0	-1	1	0	0	0	0	0	1	0	0	0	0	0	0	1	1	0	0	0	5	4	1	18
Helitron1Na_Mam:Helitron:RC	0	0	0	0	0	0	0	0	0	0	1	1	0	0	0	0	0	0	1	1	0	0	0	4	4	0	19
LTR86B1:ERVL:LTR	0	0	0	0	-1	1	0	0	0	0	0	1	0	0	0	0	0	0	1	1	0	0	0	5	4	1	18
LTR45B:ERV1:LTR	0	0	0	0	-1	1	0	0	0	0	0	1	0	0	0	0	0	0	1	1	0	0	0	5	4	1	18
Charlie4:hAT-Charlie:DNA	0	0	0	0	-1	1	0	0	0	0	0	1	0	0	0	0	0	0	1	1	0	0	0	5	4	1	18
L1MC2:L1:LINE	0	0	0	0	-1	1	0	0	0	0	0	1	0	0	0	0	0	0	1	1	0	0	0	5	4	1	18
MER63C:hAT-Blackjack:DNA	0	0	0	0	-1	1	0	0	0	0	0	1	0	0	0	0	0	0	1	0	1	0	0	5	4	1	18
PABL_A-int:ERV1:LTR	0	0	0	0	-1	1	0	0	0	0	0	1	1	0	0	0	0	0	1	-1	0	0	0	6	4	2	17
LTR53:ERVL:LTR	0	0	0	0	-1	0	0	0	0	0	0	1	0	0	0	0	0	0	1	1	0	1	0	5	4	1	18
CR1_Mam:CR1:LINE	0	0	0	0	-1	1	0	0	0	0	-1	1	0	0	0	0	0	0	1	1	0	0	0	6	4	2	17
LTR79:ERVL:LTR	0	0	0	0	-1	1	0	0	0	0	-1	1	0	0	0	0	0	0	1	1	0	0	0	6	4	2	17
Charlie31a:hAT-Charlie:DNA	0	0	0	0	0	1	0	0	0	0	0	1	0	0	0	0	0	0	1	1	0	0	0	4	4	0	19
L1MB4:L1:LINE	0	0	0	0	-1	1	0	0	0	0	0	1	0	0	0	0	0	0	1	1	0	0	0	5	4	1	18
MamGyp-int:Gypsy:LTR	0	0	0	0	-1	0	0	0	0	0	0	1	0	0	0	0	0	0	1	1	1	0	0	5	4	1	18
L1MB1:L1:LINE	0	0	0	0	-1	1	0	0	0	0	0	1	0	0	0	0	0	0	1	1	0	0	0	5	4	1	18
MamRep605:LTR?:LTR?	0	0	0	0	-1	1	0	0	0	0	0	1	0	0	0	0	0	0	1	1	0	0	0	5	4	1	18
MER63A:hAT-Blackjack:DNA	0	0	0	0	-1	1	0	0	0	0	0	1	0	0	0	0	0	0	1	1	0	0	0	5	4	1	18
MamRTE2:RTE-BovB:LINE	0	0	0	0	0	1	0	0	0	0	0	1	0	0	0	0	0	0	1	1	0	0	0	4	4	0	19
LTR5B:ERVK:LTR	0	0	0	0	-1	1	0	0	0	0	0	1	1	0	0	0	0	0	1	-1	0	0	0	6	4	2	17
L1ME3C:L1:LINE	0	0	0	0	-1	1	0	0	0	0	0	1	0	0	0	0	0	0	1	1	0	0	0	5	4	1	18
HERVH-int:ERV1:LTR	0	0	0	0	-1	0	-1	0	0	0	-1	1	0	0	0	0	0	0	1	1	1	0	0	7	4	3	16
X30_DNA:DNA:DNA	0	0	0	0	-1	1	0	0	0	0	0	1	0	0	0	0	0	0	1	1	0	0	0	5	4	1	18
LTR14A:ERVK:LTR	0	0	0	0	0	0	1	0	0	0	0	1	0	0	0	0	0	0	1	1	0	0	0	4	4	0	19
LTR5A:ERVK:LTR	0	0	0	0	-1	1	0	0	0	0	-1	1	1	0	0	-1	0	0	1	0	0	0	0	7	4	3	16
UCON38:hAT-Charlie:DNA	1	0	0	0	-1	1	0	0	0	0	0	1	0	0	0	0	0	0	1	0	0	0	0	5	4	1	18
L2d2:L2:LINE	0	0	0	0	-1	1	0	0	0	0	0	1	0	0	0	0	0	0	1	1	0	0	0	5	4	1	18
Helitron1Nb_Mam:Helitron:RC	0	0	0	0	-1	1	0	0	0	0	0	1	0	0	0	0	0	0	1	1	0	0	0	5	4	1	18
Arthur2:hAT-Tip100:DNA	1	0	0	0	-1	1	0	0	0	0	0	1	0	0	0	0	0	0	1	0	0	0	0	5	4	1	18
Charlie22a:hAT-Charlie:DNA	0	0	0	0	-1	1	0	0	0	0	0	1	0	0	0	0	0	0	1	1	0	0	0	5	4	1	18
L1PA5:L1:LINE	0	0	0	0	-1	1	0	0	0	0	-1	1	0	0	0	0	0	0	1	1	0	0	0	6	4	2	17
LTR72:ERV1:LTR	0	1	0	0	0	0	0	0	0	0	0	1	0	0	0	0	0	0	1	1	0	0	0	4	4	0	19
LTR53-int:ERVL:LTR	0	0	0	0	-1	0	0	0	0	0	0	1	0	0	0	1	0	0	1	1	0	0	0	5	4	1	18
LTR16D2:ERVL:LTR	0	0	0	0	-1	1	0	0	0	0	0	1	0	0	0	0	0	0	1	1	0	0	0	5	4	1	18
MST-int:ERVL-MaLR:LTR	0	1	-1	0	-1	0	0	0	0	0	-1	1	0	0	0	0	0	0	1	1	0	0	0	7	4	3	16
LTR24:ERV1:LTR	0	0	0	0	0	1	0	0	0	0	0	1	0	0	0	0	0	0	1	1	0	0	0	4	4	0	19
Charlie13a:hAT-Charlie:DNA	1	0	0	0	-1	0	0	0	0	-1	0	1	0	0	0	0	0	0	1	1	0	0	0	6	4	2	17
L1MA8:L1:LINE	0	0	0	0	-1	1	0	0	0	0	0	1	0	0	0	0	0	0	1	1	0	0	0	5	4	1	18
HERV30-int:ERV1:LTR	0	-1	0	0	0	1	0	1	0	0	0	1	0	0	0	0	0	0	1	0	0	0	0	5	4	1	18
LTR35:ERV1:LTR	0	1	0	0	0	1	0	0	0	0	0	1	0	0	0	0	0	0	1	0	0	0	0	4	4	0	19
MER92B:ERV1:LTR	0	0	0	0	-1	0	-1	0	0	0	0	1	1	0	0	0	0	0	1	1	0	0	0	6	4	2	17
MER4A:ERV1:LTR	0	0	0	0	-1	1	0	0	0	0	0	1	1	0	0	0	0	0	1	0	0	0	0	5	4	1	18
MER51A:ERV1:LTR	-1	0	0	0	-1	0	0	0	0	0	-1	1	1	0	0	1	0	0	1	0	0	0	0	7	4	3	16
L1PB:L1:LINE	0	0	0	0	-1	1	0	0	0	0	-1	1	1	0	0	0	0	0	1	0	0	0	0	6	4	2	17
tRNA-Ala-GCG:tRNA:tRNA	0	0	0	0	0	0	0	0	0	0	-1	1	1	0	0	0	0	0	1	1	0	0	0	5	4	1	18
MER57C1:ERV1:LTR	1	1	0	0	-1	0	0	0	0	0	-1	1	0	0	0	0	0	0	0	1	0	0	0	6	4	2	17
LTR9C:ERV1:LTR	0	0	0	0	0	1	0	0	0	0	0	1	0	0	0	0	0	0	1	1	0	0	0	4	4	0	19
X12_DNA:TcMar-Tigger:DNA	0	0	0	0	-1	1	0	0	0	0	0	1	0	0	0	0	0	0	1	1	0	0	0	5	4	1	18
LTR62:ERVL:LTR	0	1	0	0	-1	0	0	0	0	0	0	1	0	0	0	0	0	0	1	1	0	0	0	5	4	1	18
MER58B:hAT-Charlie:DNA	0	0	0	0	-1	1	0	0	0	0	0	1	0	0	0	0	0	0	1	1	0	0	0	5	4	1	18
MER76-int:ERVL:LTR	0	1	0	0	-1	1	0	0	0	0	0	1	0	0	0	0	0	0	0	1	0	0	0	5	4	1	18
AluYi6_4d:Alu:SINE	0	0	0	0	-1	0	0	0	0	0	1	1	1	0	0	0	0	0	1	0	0	0	0	5	4	1	18
MER105:hAT-Charlie:DNA	0	0	0	0	-1	1	0	0	0	0	0	1	0	0	0	0	0	0	1	1	0	0	0	5	4	1	18
MIR:MIR:SINE	0	0	0	0	-1	1	0	0	0	0	0	1	0	0	0	0	0	0	1	1	0	0	0	5	4	1	18
tRNA-Lys-AAG:tRNA:tRNA	0	0	0	0	0	0	0	0	0	0	0	1	1	0	0	0	0	0	1	1	0	0	0	4	4	0	19
LTR7Y:ERV1:LTR	0	0	0	0	-1	0	0	0	0	0	0	1	0	0	0	1	0	0	0	1	1	-1	0	6	4	2	17
MER5A1:hAT-Charlie:DNA	0	0	0	0	-1	1	0	0	0	0	0	1	0	0	0	0	0	0	1	1	0	0	0	5	4	1	18
LTR43:ERV1:LTR	1	0	0	0	0	0	0	-1	0	0	-1	1	0	0	0	0	0	0	1	1	0	0	0	6	4	2	17
tRNA-Pro-CCA:tRNA:tRNA	0	0	0	0	0	0	0	0	0	0	0	1	1	0	0	0	0	0	1	1	0	0	0	4	4	0	19
Charlie19a:hAT-Charlie:DNA	0	0	0	0	-1	1	1	0	0	0	0	1	0	0	0	0	0	0	1	0	0	0	0	5	4	1	18
LTR103b_Mam:ERV1?:LTR	0	0	0	0	-1	0	-1	0	0	0	0	1	0	0	0	0	0	0	1	1	1	0	0	6	4	2	17
HERVP71A-int:ERV1:LTR	0	0	1	0	-1	0	-1	0	0	0	0	1	0	0	0	0	0	0	1	1	0	0	0	6	4	2	17
LTR41B:ERVL:LTR	0	0	0	0	0	0	0	0	0	0	-1	1	1	0	0	0	0	0	1	1	0	0	0	5	4	1	18
L2c:L2:LINE	0	0	0	0	-1	1	0	0	0	0	0	1	0	0	0	0	0	0	1	1	0	0	0	5	4	1	18
U6:snRNA:snRNA	0	1	0	0	-1	0	0	0	0	0	-1	1	1	0	0	0	0	0	1	0	0	0	0	6	4	2	17
L1PA8A:L1:LINE	0	0	0	0	-1	1	-1	0	0	0	-1	1	0	0	0	0	0	0	1	1	0	0	0	7	4	3	16
LTR1C3:ERV1:LTR	0	0	0	0	0	1	1	0	0	0	1	1	0	0	0	0	0	0	0	0	0	0	-1	5	4	1	18
MLT1I:ERVL-MaLR:LTR	0	0	0	0	-1	1	0	0	0	0	0	1	1	0	0	0	0	0	1	0	0	0	0	5	4	1	18
LTR22B1:ERVK:LTR	1	0	0	0	-1	-1	0	0	0	0	0	1	0	0	0	1	0	0	1	0	0	0	0	6	4	2	17
MER77B:ERVL:LTR	0	0	0	0	-1	0	0	0	0	0	0	1	1	0	0	0	0	0	1	1	0	0	0	5	4	1	18
L1MA10:L1:LINE	0	0	0	0	-1	1	0	0	0	0	0	1	0	0	0	0	0	0	1	1	0	0	0	5	4	1	18
MLT1E2-int:ERVL-MaLR:LTR	1	1	0	0	-1	1	0	0	0	0	0	0	0	0	0	0	0	0	0	1	0	-1	0	6	4	2	17
Kanga11a:TcMar-Tc2:DNA	0	0	0	0	-1	1	-1	0	0	0	0	1	0	0	0	0	0	0	1	1	0	0	0	6	4	2	17
L2a:L2:LINE	0	0	0	0	-1	1	0	0	0	0	0	1	0	0	0	0	0	0	1	1	0	0	0	5	4	1	18
L1PA13:L1:LINE	0	0	0	0	-1	1	-1	0	0	0	-1	1	0	0	0	0	0	0	1	1	0	0	0	7	4	3	16
L1PA14:L1:LINE	0	0	0	0	-1	1	-1	0	0	0	0	1	1	0	0	0	0	0	1	0	0	0	0	6	4	2	17
LTR39-int:ERV1:LTR	0	0	0	0	0	0	0	0	0	0	0	1	0	0	0	1	0	0	1	1	0	0	0	4	4	0	19
LTR33:ERVL:LTR	0	0	0	0	-1	1	-1	0	0	0	0	1	0	0	0	0	0	0	1	1	0	0	0	6	4	2	17
HSMAR2:TcMar-Mariner:DNA	0	0	0	0	-1	1	0	0	0	0	0	1	0	0	0	0	0	0	1	1	0	0	0	5	4	1	18
LTR56:ERV1:LTR	0	0	0	0	-1	0	0	0	0	0	0	1	1	0	0	0	0	0	1	1	0	0	0	5	4	1	18
MER9a1:ERVK:LTR	0	1	0	0	-1	0	-1	0	0	0	0	1	0	0	0	0	0	0	1	1	0	0	0	6	4	2	17
UCON44:TcMar:DNA	-1	0	0	0	-1	1	0	0	0	0	0	1	0	0	0	0	0	0	1	1	0	0	0	6	4	2	17
LTR40c:ERVL:LTR	0	0	0	0	-1	1	0	0	0	0	0	1	0	0	0	0	0	0	1	1	0	0	0	5	4	1	18
L1MEa:L1:LINE	0	0	0	0	0	1	0	0	0	0	0	1	0	0	0	0	0	0	1	1	0	0	0	4	4	0	19
tRNA-Gly-GGY:tRNA:tRNA	0	0	0	0	0	0	0	0	0	1	1	0	1	0	0	0	0	0	1	0	0	0	0	4	4	0	19
MER8:TcMar-Tigger:DNA	1	0	0	0	-1	0	0	0	0	0	0	1	0	0	0	0	0	0	1	1	0	0	0	5	4	1	18
Tigger14a:TcMar-Tigger:DNA	0	0	0	0	-1	1	0	0	0	0	0	1	0	0	0	0	0	0	1	1	0	0	0	5	4	1	18
EUTREP15:ERV1?:LTR	0	0	0	0	0	1	0	-1	0	0	0	1	0	0	0	0	0	0	1	1	0	0	0	5	4	1	18
Charlie32a:hAT-Charlie:DNA	1	0	0	0	-1	1	0	0	0	0	0	1	0	0	0	0	0	0	1	0	0	0	0	5	4	1	18
MamSINE1:tRNA-RTE:SINE	1	0	0	0	-1	1	0	0	0	0	0	1	0	0	0	0	0	0	1	0	0	0	0	5	4	1	18
L1M3e:L1:LINE	0	0	0	0	-1	0	0	0	0	0	0	1	1	0	0	0	0	0	1	1	0	0	0	5	4	1	18
ACRO1:acro:Satellite	1	0	0	0	0	0	0	0	0	0	0	1	0	0	0	0	0	0	1	0	1	0	0	4	4	0	19
Tigger3b:TcMar-Tigger:DNA	0	0	0	0	-1	1	0	0	0	0	0	1	0	0	0	0	0	0	1	1	0	0	0	5	4	1	18
LTR19B:ERV1:LTR	0	1	0	0	-1	-1	0	0	0	0	0	1	1	0	0	0	0	0	1	0	0	0	0	6	4	2	17
L1M6:L1:LINE	0	0	0	0	-1	1	0	0	0	0	0	1	0	0	0	0	0	0	1	1	0	0	0	5	4	1	18
MamGypLTR1a:Gypsy:LTR	1	0	0	0	-1	0	0	0	0	0	0	1	1	0	0	0	0	0	1	-1	0	0	0	6	4	2	17
tRNA-Leu-TTA:tRNA:tRNA	0	0	0	0	0	0	0	0	0	0	1	1	1	0	0	0	0	0	1	0	0	0	0	4	4	0	19
HERVI-int:ERV1:LTR	0	1	0	0	0	1	-1	0	0	0	0	1	0	0	0	0	0	0	1	-1	0	0	0	6	4	2	17
MLT1G1:ERVL-MaLR:LTR	0	0	0	0	-1	1	0	0	0	0	0	1	1	0	0	0	0	0	1	0	0	0	0	5	4	1	18
L1ME3G:L1:LINE	0	0	0	0	-1	1	0	0	0	0	0	1	0	0	0	0	0	0	1	1	0	0	0	5	4	1	18
LTR16E2:ERVL:LTR	0	0	0	0	-1	1	0	0	0	0	0	1	0	0	0	0	0	0	1	0	1	0	0	5	4	1	18
LTR21A:ERV1:LTR	0	0	0	0	0	1	0	0	0	0	0	1	0	0	0	0	0	0	1	1	0	0	0	4	4	0	19
MIRb:MIR:SINE	0	0	0	0	-1	1	0	0	0	0	0	1	0	0	0	0	0	0	1	1	0	0	0	5	4	1	18
L1PB3:L1:LINE	0	0	0	0	-1	1	0	0	0	0	0	1	1	0	0	0	0	0	1	0	0	0	0	5	4	1	18
LTR82B:ERVL:LTR	0	0	0	0	-1	1	-1	0	0	0	0	1	0	0	0	0	0	0	1	1	0	0	0	6	4	2	17
CR1-1_Amn:CR1:LINE	0	0	0	0	0	1	0	0	0	0	0	1	0	0	0	0	0	0	1	1	0	0	0	4	4	0	19
L1MEd:L1:LINE	0	0	0	0	-1	1	0	0	0	0	0	1	0	0	0	0	0	0	1	1	0	0	0	5	4	1	18
LTR34:ERV1:LTR	0	0	0	0	-1	1	0	0	0	0	0	1	0	0	0	1	0	0	1	-1	0	0	0	6	4	2	17
MLT-int:ERVL-MaLR:LTR	0	0	0	0	1	0	0	0	0	0	0	1	1	0	0	0	0	0	1	0	0	0	0	4	4	0	19
MLT1E1A:ERVL-MaLR:LTR	0	0	0	0	-1	0	0	0	0	0	0	1	1	0	0	0	0	0	1	1	0	0	0	5	4	1	18
MLT2A2:ERVL:LTR	1	0	0	0	-1	0	0	0	0	0	0	1	0	0	0	1	0	0	1	0	0	0	0	5	4	1	18
LTR37B:ERV1:LTR	0	0	0	0	-1	1	0	0	0	0	0	1	0	0	0	0	0	0	1	1	0	0	0	5	4	1	18
MER94:hAT-Blackjack:DNA	0	0	0	0	-1	1	0	0	0	0	0	1	0	0	0	0	0	0	1	1	0	0	0	5	4	1	18
5S:rRNA:rRNA	0	1	0	-1	0	0	1	0	0	0	-1	0	1	0	0	0	0	0	0	1	0	0	0	6	4	2	17
L1MEj:L1:LINE	1	0	0	0	-1	0	0	0	0	0	-1	1	0	0	0	0	0	0	1	1	0	0	0	6	4	2	17
LTR9B:ERV1:LTR	0	0	0	0	-1	1	0	0	0	0	0	1	0	0	0	0	0	0	1	1	0	0	0	5	4	1	18
L1M4b:L1:LINE	1	0	0	0	-1	0	0	0	0	0	-1	1	1	0	0	0	0	0	1	0	0	0	0	6	4	2	17
MARE4:hAT-Tip100:DNA	0	0	0	0	-1	1	0	0	0	0	0	1	0	0	0	0	0	0	1	1	0	0	0	5	4	1	18
tRNA-Met:tRNA:tRNA	0	0	0	0	0	0	0	0	0	0	-1	1	1	1	0	0	0	0	1	0	0	0	0	5	4	1	18
L1M5:L1:LINE	0	0	0	0	-1	1	0	0	0	0	0	1	0	0	0	0	0	0	1	1	0	0	0	5	4	1	18
MLT1O-int:ERVL-MaLR:LTR	0	0	0	0	0	0	0	0	0	0	0	1	0	0	0	1	0	0	1	1	0	0	0	4	4	0	19
MER34C2:ERV1:LTR	0	0	0	0	-1	1	0	0	0	0	-1	1	0	0	0	0	0	0	1	1	0	0	0	6	4	2	17
MER46C:TcMar-Tigger:DNA	0	0	0	0	-1	1	0	0	0	0	0	1	0	0	0	0	0	0	1	1	0	0	0	5	4	1	18
MER113A:hAT-Charlie:DNA	0	0	0	0	-1	1	0	0	0	0	0	1	0	0	0	0	0	0	1	1	0	0	0	5	4	1	18
MamRep564:Unknown:Unknown	1	0	0	0	-1	-1	0	0	0	0	0	1	0	0	0	0	0	0	1	1	0	0	0	6	4	2	17
MER102c:hAT-Charlie:DNA	0	0	0	0	-1	-1	0	0	0	0	0	1	1	0	0	0	0	0	1	1	0	0	0	6	4	2	17
LTR86B2:ERVL:LTR	1	0	0	0	0	0	0	0	0	0	0	1	0	0	0	0	0	0	1	1	0	0	0	4	4	0	19
Tigger12:TcMar-Tigger:DNA	1	0	0	0	-1	0	0	0	0	0	-1	1	0	0	0	0	0	0	1	1	0	0	0	6	4	2	17
Charlie21a:hAT-Charlie:DNA	0	0	0	0	-1	1	0	0	0	0	0	1	0	0	0	0	0	0	1	1	0	0	0	5	4	1	18
Charlie15b:hAT-Charlie:DNA	0	0	0	0	-1	1	0	0	0	0	0	1	0	0	0	0	0	0	1	1	0	0	0	5	4	1	18
MamGypLTR3a:Gypsy:LTR	0	0	0	0	-1	1	-1	0	0	0	0	1	1	0	0	0	0	0	1	0	0	0	0	6	4	2	17
MER44B:TcMar-Tigger:DNA	0	0	0	0	-1	1	0	0	0	0	0	1	0	0	0	0	0	0	1	1	0	0	0	5	4	1	18
tRNA-Leu-CTG:tRNA:tRNA	0	0	0	0	0	0	0	0	0	0	0	1	1	0	0	0	0	0	1	1	0	0	0	4	4	0	19
MER119:hAT-Charlie:DNA	1	0	0	0	-1	1	0	0	0	0	0	1	0	0	0	0	0	0	1	0	0	0	0	5	4	1	18
L1MC5a:L1:LINE	0	0	0	0	-1	1	0	0	0	0	0	1	0	0	0	0	0	0	1	1	0	0	0	5	4	1	18
MER102b:hAT-Charlie:DNA	0	0	0	0	-1	1	0	0	0	0	0	1	0	0	0	0	0	0	1	1	0	0	0	5	4	1	18
LTR57:ERVL:LTR	0	0	0	0	-1	1	-1	0	0	0	0	1	0	0	0	0	0	0	1	1	0	0	0	6	4	2	17
L1MDb:L1:LINE	0	0	0	0	-1	0	0	0	0	0	0	1	1	0	0	0	0	0	1	-1	1	0	0	6	4	2	17
MER66B:ERV1:LTR	-1	0	0	0	-1	-1	0	0	0	0	0	1	1	0	0	0	0	0	1	0	1	0	0	7	4	3	16
LTR69:ERVL:LTR	0	0	0	0	0	0	0	1	0	0	0	1	0	0	0	0	0	0	1	1	0	0	0	4	4	0	19
AluYb9:Alu:SINE	1	0	0	0	-1	0	0	0	0	-1	1	0	1	0	0	0	0	0	1	0	0	0	0	6	4	2	17
MamGypLTR3:Gypsy:LTR	0	0	0	0	-1	1	0	0	0	0	-1	1	1	0	0	0	0	0	1	0	0	0	0	6	4	2	17
MER87:ERV1:LTR	0	1	0	0	-1	0	0	0	0	0	0	1	0	0	0	0	0	0	1	1	0	0	0	5	4	1	18
HERVE_a-int:ERV1:LTR	0	0	0	0	0	0	1	0	0	0	1	1	0	0	0	0	0	0	1	-1	0	0	0	5	4	1	18
tRNA-Ser-TCY:tRNA:tRNA	0	0	0	0	0	0	0	0	0	0	0	1	1	0	0	0	0	0	1	1	0	0	0	4	4	0	19
MER67A:ERV1:LTR	0	1	0	0	-1	1	0	0	0	0	0	1	0	0	0	0	0	0	1	0	0	0	0	5	4	1	18
tRNA-Ala-GCY:tRNA:tRNA	0	0	0	0	0	0	0	0	0	0	0	1	1	0	0	0	0	0	1	1	0	0	0	4	4	0	19
MER4D1:ERV1:LTR	0	0	0	0	-1	1	0	0	0	0	0	1	0	0	0	0	0	0	1	0	0	1	0	5	4	1	18
Tigger1:TcMar-Tigger:DNA	0	0	0	0	-1	1	0	0	0	0	0	1	0	0	0	0	0	0	1	1	0	0	0	5	4	1	18
L1MA7:L1:LINE	0	0	0	0	-1	1	0	0	0	0	0	1	0	0	0	0	0	0	1	1	0	0	0	5	4	1	18
HERVK3-int:ERVK:LTR	0	0	0	0	-1	1	0	0	0	0	0	1	1	0	0	0	0	0	1	-1	0	-1	0	7	4	3	16
AluYb8:Alu:SINE	0	0	0	0	-1	0	0	0	0	-1	0	1	1	0	0	0	0	0	1	0	0	1	0	6	4	2	17
L1M3d:L1:LINE	1	0	0	0	0	0	-1	0	0	0	-1	1	0	0	0	0	1	0	1	-1	0	0	0	7	4	3	16
MamGypLTR1d:Gypsy:LTR	0	0	0	0	-1	1	0	0	0	0	0	1	1	0	0	0	0	0	1	-1	0	0	0	6	4	2	17
MER101-int:ERV1:LTR	0	0	0	0	-1	1	0	0	0	-1	-1	1	0	0	0	0	1	0	1	-1	-1	0	0	9	4	5	14
MER58A:hAT-Charlie:DNA	1	0	0	0	-1	0	0	0	0	0	0	1	0	0	0	0	0	0	1	1	0	0	0	5	4	1	18
Tigger22N1:TcMar-Tigger:DNA	1	0	0	0	0	0	0	0	0	0	0	1	0	0	0	0	0	0	1	1	0	0	0	4	4	0	19
X4a_DNA:TcMar:DNA	0	1	0	0	-1	0	0	0	0	0	0	1	0	0	0	0	0	0	1	1	0	0	0	5	4	1	18
LTR1F2:ERV1:LTR	0	1	0	0	0	0	0	0	0	0	0	1	0	0	0	0	0	0	1	1	0	0	0	4	4	0	19
Kanga1d:TcMar-Tc2:DNA	0	0	0	0	-1	0	0	0	0	0	0	1	1	0	0	0	0	0	1	1	0	0	0	5	4	1	18
LTR81B:Gypsy:LTR	0	0	0	0	0	1	0	0	0	0	0	1	0	0	0	0	0	0	1	1	0	0	0	4	4	0	19
Tigger4a:TcMar-Tigger:DNA	0	0	0	0	-1	1	0	0	0	-1	0	1	0	0	0	0	0	0	1	1	0	0	0	6	4	2	17
Eulor12:DNA?:DNA?	0	0	0	0	0	0	0	0	0	0	0	1	0	0	0	1	0	0	1	1	0	0	0	4	4	0	19
Ricksha_0:MULE-MuDR:DNA	0	0	0	0	-1	1	0	0	0	0	0	1	1	0	0	0	0	0	1	0	0	0	0	5	4	1	18
LTR28B:ERV1:LTR	0	0	0	0	-1	1	0	1	0	0	-1	1	0	0	0	0	0	0	1	0	0	0	0	6	4	2	17
ORSL-2a:hAT-Tip100:DNA	0	0	0	0	-1	1	0	0	0	0	0	1	0	0	0	0	0	0	1	1	0	0	0	5	4	1	18
LTR7B:ERV1:LTR	0	1	0	0	-1	0	0	0	0	0	1	1	0	0	0	0	0	0	1	-1	0	0	0	6	4	2	17
PrimLTR79:ERV1:LTR	0	1	0	0	-1	1	0	0	0	0	0	1	0	0	0	0	0	0	1	-1	0	0	0	6	4	2	17
X24_LINE:L2:LINE	0	0	0	0	-1	1	0	0	0	0	0	1	0	0	0	0	0	0	1	1	0	0	0	5	4	1	18
Charlie26a:hAT-Charlie:DNA	0	0	0	0	-1	1	0	0	0	0	0	1	0	0	0	0	0	0	1	1	0	0	0	5	4	1	18
MER2B:TcMar-Tigger:DNA	1	0	0	0	-1	1	0	0	0	0	0	1	0	0	0	0	0	0	1	0	0	0	0	5	4	1	18
PABL_B-int:ERV1:LTR	1	0	0	0	-1	1	0	0	0	0	0	1	0	0	0	0	0	0	1	0	0	0	0	5	4	1	18
EUTREP2:Unknown:Unknown	0	0	0	0	-1	1	0	0	0	0	0	1	0	0	0	0	0	0	1	1	0	0	0	5	4	1	18
Tigger19b:TcMar-Tigger:DNA	0	0	0	0	-1	1	0	0	0	0	0	1	0	0	0	0	0	0	1	1	0	0	0	5	4	1	18
MSTA:ERVL-MaLR:LTR	0	0	-1	0	-1	1	-1	0	0	0	0	1	0	0	0	0	0	0	1	1	0	0	0	7	4	3	16
UCON8:DNA:DNA	1	0	0	0	0	1	0	0	0	0	0	1	0	0	0	0	0	0	1	0	0	0	0	4	4	0	19
MLT1A1-int:ERVL-MaLR:LTR	0	0	0	0	-1	1	0	0	0	0	0	1	1	0	0	0	0	0	1	0	0	0	0	5	4	1	18
MER21C:ERVL:LTR	0	0	0	0	-1	1	0	0	0	0	0	1	0	0	0	0	0	0	1	1	0	0	0	5	4	1	18
Eutr11:DNA:DNA	1	0	0	0	-1	0	0	0	0	0	0	1	1	0	0	0	0	0	1	0	0	0	0	5	4	1	18
L1M3:L1:LINE	0	0	0	0	-1	1	0	0	0	0	0	1	0	0	0	0	0	0	1	1	0	0	0	5	4	1	18
tRNA-Cys-TGY:tRNA:tRNA	0	0	0	0	-1	0	0	0	0	0	-1	1	1	0	0	0	0	0	1	1	0	0	0	6	4	2	17
L2:L2:LINE	0	0	0	0	-1	1	0	0	0	0	0	1	0	0	0	0	0	0	1	1	0	0	0	5	4	1	18
Tigger1a_Art:TcMar-Tigger:DNA	1	0	0	0	-1	0	0	0	0	-1	0	1	0	0	0	0	0	0	1	1	0	0	-1	7	4	3	16
L1ME3Cz:L1:LINE	0	0	0	0	-1	1	0	0	0	0	0	1	0	0	0	0	0	0	1	1	0	0	0	5	4	1	18
Tigger17b:TcMar-Tigger:DNA	0	0	0	0	0	1	0	0	0	0	0	1	0	0	0	0	0	0	1	1	0	0	0	4	4	0	19
MER117:hAT-Charlie:DNA	0	0	0	0	-1	1	0	0	0	0	0	1	0	0	0	0	0	0	1	1	0	0	0	5	4	1	18
L1ME3D:L1:LINE	1	0	0	0	-1	1	0	0	0	0	-1	1	0	0	0	0	0	0	1	-1	0	0	0	7	4	3	16
Kanga1b:TcMar-Tc2:DNA	0	1	0	0	-1	0	0	0	0	0	0	1	0	0	0	0	0	0	1	1	0	0	0	5	4	1	18
X7A_LINE:CR1:LINE	0	0	0	0	-1	1	0	0	0	-1	0	1	0	0	0	0	0	0	1	1	0	0	0	6	4	2	17
MER1B:hAT-Charlie:DNA	0	0	0	0	-1	1	0	0	0	0	0	1	0	0	0	0	1	0	1	0	0	0	0	5	4	1	18
Tigger8:TcMar-Tigger:DNA	0	0	0	0	-1	1	0	0	0	0	0	1	0	0	0	0	0	0	1	1	0	0	0	5	4	1	18
Chap1a_Mam:hAT-Charlie:DNA	0	0	0	0	-1	1	0	0	0	0	-1	1	0	0	0	0	0	0	1	1	0	0	0	6	4	2	17
tRNA-Leu-CTY:tRNA:tRNA	0	0	0	0	0	0	0	0	0	0	0	1	1	0	0	0	0	0	1	1	0	0	0	4	4	0	19
LTR1F:ERV1:LTR	0	1	0	0	-1	0	0	0	0	0	0	1	0	0	0	0	0	0	1	1	0	0	0	5	4	1	18
Tigger17a:TcMar-Tigger:DNA	0	0	0	0	-1	1	0	0	0	0	0	1	0	0	0	0	0	0	1	1	0	0	0	5	4	1	18
HERV15-int:ERV1:LTR	0	-1	0	0	-1	0	0	0	0	0	0	1	0	0	0	0	0	0	1	0	1	0	1	6	4	2	17
MLT2E:ERVL:LTR	0	0	0	0	-1	1	0	0	0	0	0	1	0	0	0	0	0	0	1	1	0	0	0	5	4	1	18
Tigger9b:TcMar-Tigger:DNA	0	0	0	0	-1	1	0	0	0	0	-1	1	0	0	0	0	0	0	1	1	0	0	0	6	4	2	17
Looper:PiggyBac:DNA	0	1	0	0	-1	0	0	0	0	-1	0	1	0	0	0	0	0	0	1	1	0	0	0	6	4	2	17
MER131:DNA?:DNA?	1	0	0	0	0	0	0	0	0	0	-1	1	0	0	0	0	0	0	1	1	0	0	0	5	4	1	18
L1M4:L1:LINE	0	0	0	0	-1	0	0	0	0	0	0	1	1	0	0	0	0	0	1	1	0	0	0	5	4	1	18
LTR8A:ERV1:LTR	0	0	0	0	-1	1	-1	0	0	0	0	1	1	0	0	0	0	0	1	-1	0	0	0	7	4	3	16
X2_LINE:CR1:LINE	0	0	0	0	-1	1	0	0	0	0	0	1	0	0	0	0	0	0	1	1	0	0	0	5	4	1	18
L1MB3:L1:LINE	0	0	0	0	-1	1	0	0	0	0	0	1	0	0	0	0	0	0	1	1	0	0	0	5	4	1	18
MLT1E3:ERVL-MaLR:LTR	0	0	0	0	-1	1	0	0	0	0	0	1	0	0	0	0	0	0	1	1	0	0	0	5	4	1	18
Tigger4:TcMar-Tigger:DNA	0	0	0	0	-1	1	-1	0	0	0	0	1	0	0	0	0	0	0	1	1	0	0	0	6	4	2	17
L1MB7:L1:LINE	0	0	0	0	-1	1	0	0	0	0	0	1	0	0	0	0	0	0	1	1	0	0	0	5	4	1	18
L1M7:L1:LINE	0	0	0	0	-1	1	-1	0	0	0	0	1	1	0	0	0	0	0	1	0	0	0	0	6	4	2	17
MER45A:hAT-Tip100:DNA	0	0	0	0	-1	1	-1	0	0	0	0	1	1	0	0	0	0	0	1	0	0	0	0	6	4	2	17
L1P4:L1:LINE	0	0	0	0	-1	1	0	0	0	0	0	1	0	0	0	0	0	0	1	0	1	0	0	5	4	1	18
L2b:L2:LINE	0	0	0	0	-1	1	0	0	0	0	0	1	0	0	0	0	0	0	1	1	0	0	0	5	4	1	18
LTR84a:ERVL:LTR	1	0	0	0	-1	0	-1	0	0	0	0	1	0	0	0	0	0	0	1	1	0	0	0	6	4	2	17
EUTREP8:LTR:LTR	0	0	0	0	-1	1	0	0	0	0	0	1	0	0	0	0	1	0	1	0	0	0	0	5	4	1	18
MER104:TcMar-Tc2:DNA	0	0	0	0	-1	1	0	0	0	0	0	1	0	0	0	0	0	0	1	1	0	0	0	5	4	1	18
LTR16C:ERVL:LTR	-1	0	0	0	-1	1	-1	0	0	0	0	1	0	0	0	0	1	0	1	0	0	0	0	7	4	3	16
Tigger11a:TcMar-Tigger:DNA	0	0	0	0	0	0	0	0	0	0	1	1	0	0	0	0	0	0	1	1	0	0	0	4	4	0	19
L1ME4c:L1:LINE	0	0	0	0	-1	1	0	0	0	0	0	1	0	0	0	0	0	0	1	1	0	0	0	5	4	1	18
MamGypLTR2c:Gypsy:LTR	0	0	0	0	0	0	0	0	0	0	0	1	0	0	0	1	0	0	1	-1	1	0	0	5	4	1	18
LTR89:ERVL?:LTR	0	1	0	0	-1	0	0	0	0	0	0	1	0	0	0	0	0	0	1	1	0	0	0	5	4	1	18
EUTREP7:ERV1:LTR	0	1	0	0	-1	1	0	0	0	0	0	1	0	0	0	0	0	0	1	0	0	0	0	5	4	1	18
MamRep1151:LTR?:LTR?	0	0	0	0	-1	1	0	0	0	0	0	1	0	0	0	0	0	0	1	1	0	0	0	5	4	1	18
L1PA7:L1:LINE	0	0	0	0	-1	1	0	0	0	0	0	1	0	0	0	0	0	0	1	1	0	0	0	5	4	1	18
HSMAR1:TcMar-Mariner:DNA	0	1	0	0	-1	1	0	0	0	0	0	1	0	0	0	0	0	0	1	0	0	0	0	5	4	1	18
Tigger4b:TcMar-Tigger:DNA	0	0	0	0	-1	1	0	0	0	0	0	1	0	0	0	0	0	0	1	1	0	0	0	5	4	1	18
MamTip2:hAT-Tip100:DNA	0	0	0	0	-1	1	0	0	0	0	0	1	0	0	0	0	0	0	1	1	0	0	0	5	4	1	18
Tigger16b:TcMar-Tigger:DNA	1	0	0	0	-1	0	0	0	0	0	0	1	0	0	0	0	0	0	1	1	0	0	0	5	4	1	18
MER48:ERV1:LTR	0	0	0	0	0	0	0	0	0	0	0	1	1	0	0	0	0	0	1	1	0	0	0	4	4	0	19
LTR4:ERV1:LTR	0	-1	0	0	-1	1	0	1	0	0	0	1	0	0	0	0	0	0	0	1	0	0	0	6	4	2	17
UCON76:Unknown:Unknown	1	0	0	0	-1	0	0	0	0	0	0	1	0	0	0	0	0	0	1	1	0	0	0	5	4	1	18
LTR37-int:ERV1:LTR	0	0	0	0	-1	0	0	0	0	0	0	1	1	0	0	0	0	0	1	1	0	0	0	5	4	1	18
UCON37:hAT-Ac:DNA	0	0	0	0	-1	0	1	0	0	0	0	1	0	0	0	0	0	0	1	1	0	0	0	5	4	1	18
HERVH48-int:ERV1:LTR	0	1	1	0	-1	0	0	0	0	0	0	1	0	0	0	0	0	0	1	0	0	0	0	5	4	1	18
MER101B:ERV1:LTR	1	0	0	0	0	0	0	0	0	0	0	1	0	0	0	1	0	0	1	0	0	0	0	4	4	0	19
Tigger20a:TcMar-Tigger:DNA	1	0	0	0	-1	0	0	0	0	0	0	1	0	0	0	0	0	0	1	1	0	0	0	5	4	1	18
LTR41C:ERVL:LTR	0	0	0	0	-1	0	0	0	0	0	0	1	1	0	0	0	0	0	1	1	0	0	0	5	4	1	18
LTR8B:ERV1:LTR	0	0	0	0	-1	1	-1	0	0	0	0	1	0	0	0	0	0	0	1	1	0	0	0	6	4	2	17
hAT-1_Mam:hAT-Tag1:DNA	0	0	0	0	-1	1	0	0	0	0	0	1	0	0	0	0	0	0	1	1	0	0	0	5	4	1	18
tRNA-His-CAY:tRNA:tRNA	0	0	0	0	0	0	0	0	0	0	0	1	1	0	0	0	0	0	1	1	0	0	0	4	4	0	19
X17_LINE:CR1:LINE	0	0	0	0	0	1	-1	0	0	0	0	1	0	0	0	0	0	0	1	1	0	0	0	5	4	1	18
MLT2B5:ERVL:LTR	1	1	0	0	-1	0	0	0	0	0	-1	1	0	0	0	0	0	0	1	0	0	-1	0	7	4	3	16
LTR1C:ERV1:LTR	1	0	0	0	0	0	0	0	0	0	0	1	0	0	0	0	0	0	1	1	0	0	0	4	4	0	19
MamGypLTR1b:Gypsy:LTR	0	0	0	0	-1	1	0	0	0	0	0	1	1	0	0	0	0	0	1	-1	0	0	0	6	4	2	17
UCON2:DNA?:DNA?	0	0	0	0	0	1	0	0	0	0	0	1	0	0	0	0	0	0	1	1	0	0	0	4	4	0	19
Arthur1B:hAT-Tip100:DNA	0	0	0	0	-1	1	0	0	0	0	0	1	0	0	0	0	0	0	1	1	0	0	0	5	4	1	18
Tigger19a:TcMar-Tigger:DNA	0	0	0	0	-1	1	0	0	0	0	0	1	0	0	0	0	0	0	1	1	0	0	0	5	4	1	18
Charlie18a:hAT-Charlie:DNA	0	0	0	0	-1	1	0	0	0	0	0	1	0	0	0	0	0	0	1	1	0	0	0	5	4	1	18
Tigger12A:TcMar-Tigger:DNA	1	0	0	0	-1	1	0	0	0	0	0	1	0	0	0	0	0	0	1	-1	0	0	0	6	4	2	17
MER85:PiggyBac:DNA	0	0	0	0	-1	1	0	0	0	0	0	1	0	0	0	0	0	0	1	1	0	0	0	5	4	1	18
BC200:scRNA:scRNA	0	0	-1	0	-1	-1	0	0	0	0	0	0	1	0	0	0	0	0	1	1	0	1	0	7	4	3	16
L1MCa:L1:LINE	0	0	0	0	-1	1	0	0	0	0	-1	1	0	0	0	0	0	0	1	1	0	0	0	6	4	2	17
Tigger18a:TcMar-Tigger:DNA	0	0	0	0	-1	1	0	0	0	0	0	1	0	0	0	0	0	0	1	1	0	0	0	5	4	1	18
Charlie1b:hAT-Charlie:DNA	0	0	0	0	-1	1	0	0	0	0	0	1	0	0	0	0	0	0	1	1	0	0	0	5	4	1	18
MER52A:ERV1:LTR	0	0	0	0	-1	1	0	0	0	-1	0	1	1	0	0	0	0	0	1	0	0	0	0	6	4	2	17
L1ME2z:L1:LINE	0	0	0	0	-1	1	0	0	0	0	0	1	0	0	0	0	0	0	1	1	0	0	0	5	4	1	18
MER127:TcMar-Tigger:DNA	0	0	0	0	0	1	0	0	0	0	0	1	0	0	0	0	0	0	1	1	0	0	0	4	4	0	19
UCON58:DNA?:DNA?	0	0	0	0	-1	1	0	0	0	0	0	1	0	0	0	0	0	0	1	1	0	0	0	5	4	1	18
Charlie9:hAT-Charlie:DNA	0	0	0	0	0	0	0	0	0	0	1	1	0	0	0	0	0	0	1	1	0	0	0	4	4	0	19
LTR16:ERVL:LTR	0	0	0	0	-1	1	-1	0	0	0	0	1	1	0	0	0	0	0	1	0	0	0	0	6	4	2	17
L1ME2:L1:LINE	0	0	0	0	-1	1	0	0	0	0	-1	1	0	0	0	0	0	0	1	1	0	-1	0	7	4	3	16
MER41D:ERV1:LTR	0	1	0	0	-1	1	0	0	0	0	0	1	0	0	0	0	0	0	1	0	0	0	0	5	4	1	18
L1MEg:L1:LINE	0	0	0	0	-1	0	0	0	0	0	0	1	1	0	0	0	0	0	1	0	0	1	0	5	4	1	18
LTR85b:Gypsy?:LTR	0	0	0	0	-1	1	0	0	0	0	0	1	1	0	0	0	0	0	1	0	0	0	0	5	4	1	18
MER11C:ERVK:LTR	0	0	0	0	-1	0	-1	0	0	0	-1	1	0	0	0	1	0	0	1	1	0	0	0	7	4	3	16
HERVK22-int:ERVK:LTR	0	0	0	0	-1	0	0	0	0	0	0	1	0	0	0	0	1	0	1	1	0	0	0	5	4	1	18
AluYk4:Alu:SINE	1	0	0	0	-1	0	0	0	0	0	0	1	1	0	0	0	0	0	1	0	0	0	0	5	4	1	18
LTR23:ERV1:LTR	0	0	0	0	-1	0	0	0	0	0	0	1	1	0	0	0	0	0	1	1	0	0	0	5	4	1	18
MER1A:hAT-Charlie:DNA	0	0	0	0	-1	1	0	0	0	0	0	1	0	0	0	0	0	0	1	1	0	-1	0	6	4	2	17
MADE1:TcMar-Mariner:DNA	0	0	0	0	-1	1	0	0	0	0	0	1	0	0	0	0	0	0	1	1	0	0	0	5	4	1	18
MER57A-int:ERV1:LTR	0	0	0	0	-1	1	0	0	0	0	0	1	0	0	0	0	0	0	1	1	0	0	0	5	4	1	18
X6a_DNA:TcMar-Tigger:DNA	0	0	0	0	-1	1	0	0	0	0	0	1	0	0	0	0	0	0	1	1	0	0	0	5	4	1	18
MER6B:TcMar-Tigger:DNA	0	0	0	0	-1	1	0	0	0	-1	0	1	0	0	0	0	0	0	1	1	0	0	0	6	4	2	17
LTR16D:ERVL:LTR	0	0	0	0	-1	0	0	0	0	0	0	1	1	0	0	0	0	0	1	1	0	0	0	5	4	1	18
FLAM_A:Alu:SINE	0	0	0	0	-1	0	0	0	0	0	0	1	1	0	0	0	0	0	1	1	0	0	0	5	4	1	18
tRNA-Pro-CCY:tRNA:tRNA	0	0	0	0	0	0	0	0	0	0	0	1	1	0	0	0	0	0	1	1	0	0	0	4	4	0	19
MER34A1:ERV1:LTR	0	0	0	0	-1	0	0	0	0	0	-1	1	1	0	0	0	0	0	1	1	0	0	0	6	4	2	17
X24_DNA:DNA:DNA	0	0	0	0	-1	1	0	0	0	0	0	1	0	0	0	0	0	0	1	1	0	0	0	5	4	1	18
tRNA-Thr-ACY:tRNA:tRNA	0	0	0	0	0	0	0	0	0	0	0	1	1	0	0	0	0	0	1	1	0	0	0	4	4	0	19
MER67D:ERV1:LTR	-1	0	0	0	-1	1	-1	0	0	0	0	1	0	0	0	1	0	0	1	0	0	0	0	7	4	3	16
MSR1:Satellite:Satellite	0	1	0	0	0	-1	0	0	0	-1	0	1	1	0	0	0	0	0	0	1	0	0	0	6	4	2	17
MER101:ERV1:LTR	0	0	0	0	-1	0	0	1	0	0	0	1	0	0	0	0	0	0	1	1	0	0	0	5	4	1	18
MamTip1b:hAT-Tip100:DNA	0	0	0	0	-1	1	0	0	0	0	0	1	0	0	0	0	0	0	1	1	0	0	0	5	4	1	18
MER67B:ERV1:LTR	-1	0	0	0	-1	1	0	0	0	0	0	1	0	0	0	0	0	0	1	1	0	0	0	6	4	2	17
HERVK14C-int:ERVK:LTR	0	-1	0	0	-1	1	0	0	0	0	0	1	0	0	0	0	0	0	1	1	0	0	0	6	4	2	17
LTR59:ERV1:LTR	0	0	0	0	0	0	0	0	0	0	0	1	0	0	0	1	0	0	1	1	0	0	0	4	4	0	19
MER124:DNA?:DNA?	0	0	0	0	-1	1	0	0	0	0	0	1	0	0	0	0	0	0	1	1	0	0	0	5	4	1	18
L1MB8:L1:LINE	0	0	0	0	-1	1	0	0	0	0	0	1	0	0	0	0	0	0	1	1	0	0	0	5	4	1	18
LTR86A2:ERVL:LTR	1	0	0	0	-1	0	0	0	0	0	0	1	0	0	0	0	0	0	1	1	-1	0	0	6	4	2	17
MER34C:ERV1:LTR	1	0	0	0	-1	0	0	0	0	0	0	1	1	0	0	0	0	0	1	0	0	-1	0	6	4	2	17
LTR16D1:ERVL:LTR	-1	1	0	0	0	-1	0	-1	0	0	0	1	0	0	1	-1	0	0	1	-1	0	0	0	9	4	5	14
MER5B:hAT-Charlie:DNA	0	0	0	0	-1	1	0	0	0	0	0	1	0	0	0	0	0	0	1	1	0	0	0	5	4	1	18
MamRep137:TcMar-Tigger:DNA	0	0	0	0	-1	1	0	0	0	0	0	1	0	0	0	0	0	0	1	1	0	0	0	5	4	1	18
MER51-int:ERV1:LTR	0	0	0	0	-1	0	-1	0	0	0	0	1	1	0	0	0	0	0	1	1	0	0	0	6	4	2	17
MERX:TcMar-Tigger:DNA	0	0	0	0	-1	1	0	0	0	0	0	1	0	0	0	0	0	0	1	1	0	0	0	5	4	1	18
MER44C:TcMar-Tigger:DNA	0	0	0	0	-1	1	0	0	0	0	0	1	0	0	0	0	0	0	1	1	0	0	0	5	4	1	18
LTR2B:ERV1:LTR	0	0	0	0	0	0	-1	0	0	0	-1	1	0	0	0	0	0	0	1	-1	1	1	0	7	4	3	16
MADE2:TcMar-Mariner:DNA	0	0	0	0	-1	1	0	0	0	0	0	1	0	0	0	0	0	0	1	1	0	0	0	5	4	1	18
MamGypsy2-I:Gypsy:LTR	0	0	0	0	-1	1	0	0	0	0	0	1	0	0	0	0	0	0	1	1	0	0	0	5	4	1	18
Tigger2a:TcMar-Tigger:DNA	0	0	0	0	-1	1	0	0	0	0	0	1	0	0	0	0	0	0	1	1	0	0	0	5	4	1	18
EUTREP16:LTR:LTR	0	0	0	0	-1	1	0	0	0	0	0	1	0	0	0	0	0	0	1	1	0	0	0	5	4	1	18
L1ME5:L1:LINE	0	0	0	0	-1	1	0	0	0	0	0	1	0	0	0	0	0	0	1	1	0	-1	0	6	4	2	17
Zaphod2:hAT-Tip100:DNA	1	0	0	0	-1	1	0	0	0	0	0	1	0	0	0	0	0	0	1	0	0	0	0	5	4	1	18
HERVK11D-int:ERVK:LTR	0	0	0	0	0	0	0	0	0	0	0	1	0	0	0	0	0	0	1	1	0	0	1	4	4	0	19
MER31B:ERV1:LTR	0	0	0	0	-1	1	0	0	0	0	-1	1	0	0	0	0	0	0	1	1	0	0	0	6	4	2	17
X32_DNA:TcMar-Tc1:DNA	1	0	0	0	0	0	0	0	0	0	0	1	0	0	0	0	0	0	1	1	-1	0	0	5	4	1	18
Charlie1:hAT-Charlie:DNA	0	0	0	0	-1	1	0	0	0	0	0	1	0	0	0	0	0	0	1	1	0	0	0	5	4	1	18
tRNA-Ile-ATT:tRNA:tRNA	0	0	0	0	-1	0	0	0	0	0	0	1	1	0	0	0	0	0	1	1	0	0	0	5	4	1	18
LTR33C:ERVL:LTR	0	0	0	0	-1	1	0	0	0	0	-1	1	0	0	0	0	0	0	1	1	0	0	0	6	4	2	17
UCON4:DNA:DNA	1	0	0	0	-1	1	0	0	0	0	0	1	0	0	0	0	0	0	1	-1	0	0	0	6	4	2	17
Charlie4a:hAT-Charlie:DNA	0	0	0	0	-1	1	0	0	0	0	0	1	0	0	0	0	0	0	1	1	0	0	0	5	4	1	18
MLT1K-int:ERVL-MaLR:LTR	0	0	0	0	-1	1	0	0	0	0	0	1	0	0	0	0	0	0	1	1	0	0	0	5	4	1	18
HERV4_I-int:ERV1:LTR	1	0	0	0	-1	0	-1	0	0	0	0	1	1	0	0	0	0	0	1	0	0	0	0	6	4	2	17
tRNA-Asn-AAC:tRNA:tRNA	0	0	0	0	0	0	0	0	0	0	0	0	1	0	0	1	0	0	1	1	0	0	0	4	4	0	19
Charlie16a:hAT-Charlie:DNA	0	0	0	0	-1	1	0	0	0	0	0	1	0	0	0	1	0	0	1	0	0	0	0	5	4	1	18
Kanga2_a:TcMar-Tc2:DNA	0	0	0	0	-1	1	0	0	0	0	0	1	0	0	0	0	0	0	1	1	0	0	0	5	4	1	18
MER67C:ERV1:LTR	0	0	0	0	-1	0	-1	0	0	0	0	1	0	0	0	0	0	0	1	1	1	0	0	6	4	2	17
LTR83:ERVL:LTR	0	0	0	0	-1	1	0	0	0	0	0	1	0	0	0	0	0	0	1	1	0	0	0	5	4	1	18
MER51B:ERV1:LTR	0	0	0	0	-1	0	0	0	0	0	0	1	1	0	0	0	0	0	1	0	0	1	0	5	4	1	18
Tigger10:TcMar-Tigger:DNA	0	0	0	0	-1	1	0	0	0	0	0	1	0	0	0	0	0	0	1	1	0	0	0	5	4	1	18
LTR40b:ERVL:LTR	0	0	0	0	-1	1	0	0	0	0	0	1	0	0	0	0	0	0	1	1	0	0	0	5	4	1	18
Tigger1a_Mars:TcMar-Tigger:DNA	0	0	0	0	0	0	0	0	0	0	0	1	0	0	0	0	0	0	1	1	0	0	1	4	4	0	19
Helitron3Na_Mam:Helitron:RC	0	0	0	0	-1	1	0	0	0	0	0	1	0	0	0	0	0	0	1	1	0	0	0	5	4	1	18
MER83B-int:ERV1:LTR	0	0	0	0	0	1	0	0	0	0	0	1	0	0	0	0	0	0	1	1	0	0	0	4	4	0	19
MLT1H2-int:ERVL-MaLR:LTR	0	0	0	0	-1	1	0	0	0	0	0	1	0	0	0	0	0	0	1	1	0	0	0	5	4	1	18
L4_B_Mam:RTE-X:LINE	0	0	0	0	-1	1	0	0	0	0	0	1	0	0	0	0	0	0	1	1	0	0	0	5	4	1	18
AluJr4:Alu:SINE	1	0	0	0	-1	0	0	0	0	0	0	1	1	0	0	0	0	0	1	0	0	0	0	5	4	1	18
L2d:L2:LINE	0	0	0	0	-1	1	0	0	0	0	0	1	0	0	0	0	0	0	1	1	0	0	0	5	4	1	18
MER49:ERV1:LTR	-1	0	0	0	-1	1	0	0	0	0	-1	1	1	0	0	0	0	0	1	-1	0	0	0	8	4	4	15
LOR1a:ERV1:LTR	0	0	0	0	-1	0	0	1	0	0	0	1	0	0	0	0	0	0	1	1	0	0	0	5	4	1	18
X6A_LINE:CR1:LINE	0	0	0	0	-1	1	0	0	0	0	0	1	0	0	0	0	0	0	1	1	0	0	0	5	4	1	18
LTR67B:ERVL:LTR	0	0	0	0	-1	1	0	0	0	0	0	1	1	0	0	0	0	0	1	0	0	0	0	5	4	1	18
MLT2A1:ERVL:LTR	0	0	0	0	-1	1	-1	0	0	0	0	1	0	0	0	0	0	0	1	1	0	0	0	6	4	2	17
L1MA2:L1:LINE	0	0	0	0	-1	1	-1	0	0	0	-1	1	0	0	0	0	0	0	1	1	0	-1	0	8	4	4	15
MER84:ERV1:LTR	0	1	0	0	0	0	0	0	0	0	0	1	0	0	0	0	0	0	1	1	0	0	0	4	4	0	19
Charlie1a:hAT-Charlie:DNA	0	0	0	0	-1	1	0	0	0	-1	0	1	0	0	0	0	0	0	1	1	0	0	0	6	4	2	17
LTR101_Mam:ERVL:LTR	0	0	0	0	-1	0	0	0	0	0	0	1	1	0	0	0	0	0	1	1	0	0	0	5	4	1	18
UCON48:Unknown:Unknown	0	0	0	0	-1	1	0	0	0	0	0	1	0	0	0	0	0	0	1	1	0	0	0	5	4	1	18
SST1:centr:Satellite	0	0	0	0	0	-1	-1	-1	0	0	-1	1	1	0	0	0	0	0	0	-1	1	0	1	9	4	5	14
LTR102_Mam:ERVL:LTR	0	0	0	0	-1	1	-1	0	0	0	0	1	0	0	0	0	0	0	1	1	0	0	0	6	4	2	17
MLT1H:ERVL-MaLR:LTR	0	0	0	0	-1	1	0	0	0	0	0	1	1	0	0	0	0	0	1	0	0	0	0	5	4	1	18
LTR28:ERV1:LTR	0	0	0	0	0	1	-1	0	0	0	0	1	0	0	0	0	0	0	1	1	0	0	0	5	4	1	18
MLT1F1-int:ERVL-MaLR:LTR	0	0	0	0	-1	0	0	0	0	0	0	1	0	0	0	0	0	0	1	1	0	1	0	5	4	1	18
MER47A:TcMar-Tigger:DNA	1	0	0	0	-1	0	0	0	0	0	0	1	0	0	0	0	0	0	1	1	0	0	0	5	4	1	18
MER68:ERVL:LTR	1	0	0	0	-1	0	0	0	0	0	0	1	0	0	0	0	0	0	1	1	0	0	0	5	4	1	18
MER3:hAT-Charlie:DNA	0	0	0	0	-1	1	0	0	0	0	0	1	0	0	0	0	0	0	1	1	0	0	0	5	4	1	18
L4_A_Mam:RTE-X:LINE	0	0	0	0	-1	1	0	0	0	0	0	1	0	0	0	0	0	0	1	1	0	0	0	5	4	1	18
MLT1E:ERVL-MaLR:LTR	0	0	0	0	-1	1	0	0	0	0	0	1	0	0	0	0	0	0	1	1	0	0	0	5	4	1	18
L1MB2:L1:LINE	0	0	0	0	-1	1	0	0	0	0	0	1	0	0	0	0	0	0	1	1	0	0	0	5	4	1	18
tRNA-Arg-AGG:tRNA:tRNA	0	0	0	0	0	0	0	0	0	0	-1	1	1	0	0	0	0	0	1	1	0	0	0	5	4	1	18
MER103C:hAT-Charlie:DNA	0	0	0	0	-1	1	0	0	0	0	0	1	0	0	0	0	0	0	1	1	0	0	0	5	4	1	18
L4_C_Mam:RTE-X:LINE	0	0	0	0	-1	1	0	0	0	0	0	1	0	0	0	0	0	0	1	1	0	0	0	5	4	1	18
L1ME3:L1:LINE	0	0	0	0	-1	1	0	0	0	0	0	1	0	0	0	0	0	0	1	1	0	0	0	5	4	1	18
Kanga1c:TcMar-Tc2:DNA	0	0	0	0	-1	1	0	0	0	0	0	1	0	0	0	0	0	0	1	1	0	0	0	5	4	1	18
L3b:CR1:LINE	1	0	0	0	-1	1	0	0	0	0	0	1	0	0	0	0	0	0	1	0	0	0	0	5	4	1	18
AmnL2-1:L2:LINE	0	-1	0	0	-1	0	0	0	0	0	0	1	0	0	0	0	0	0	1	1	0	0	0	5	3	2	18
Charlie10:hAT-Charlie:DNA	0	0	0	0	-1	1	0	0	0	0	0	1	0	0	0	0	0	0	1	0	0	0	0	4	3	1	19
LTR27B:ERV1:LTR	0	0	0	0	-1	0	0	0	0	0	0	1	0	0	0	0	0	0	1	1	0	0	0	4	3	1	19
MER113:hAT-Charlie:DNA	0	0	0	0	-1	1	0	0	0	0	0	1	0	0	0	0	0	0	1	0	0	0	0	4	3	1	19
Tigger16a:TcMar-Tigger:DNA	0	0	0	0	-1	1	0	0	0	0	0	1	0	0	0	0	0	0	1	0	0	0	0	4	3	1	19
LTR26B:ERV1:LTR	0	0	0	0	0	0	0	0	0	0	0	1	0	0	0	0	0	0	1	1	0	0	0	3	3	0	20
MamRep605b:LTR?:LTR?	0	0	0	0	-1	0	0	0	0	0	0	1	0	0	0	0	0	0	1	1	0	0	0	4	3	1	19
LTR22C2:ERVK:LTR	0	0	0	0	0	0	0	0	0	0	0	1	0	0	0	0	0	0	1	1	0	0	0	3	3	0	20
L1M3b:L1:LINE	0	0	0	0	-1	0	0	0	0	0	0	1	0	0	0	0	0	0	1	0	1	0	0	4	3	1	19
Tigger5:TcMar-Tigger:DNA	0	0	0	0	-1	1	0	0	0	0	0	1	0	0	0	0	0	0	1	0	0	0	0	4	3	1	19
MER83C:ERV1:LTR	0	0	0	0	0	0	0	0	0	0	0	1	0	0	0	0	0	0	1	1	0	0	0	3	3	0	20
Helitron2Na_Mam:Helitron?:RC?	1	0	0	0	0	0	0	0	0	0	0	1	0	0	0	0	0	0	1	0	0	0	0	3	3	0	20
MER52D:ERV1:LTR	0	0	0	0	-1	0	0	0	0	-1	0	1	1	0	0	0	0	0	1	0	0	0	0	5	3	2	18
L1MD3:L1:LINE	0	0	0	0	-1	0	0	0	0	0	0	1	0	0	0	0	0	0	1	1	0	0	0	4	3	1	19
Tigger2b_Pri:TcMar-Tigger:DNA	0	0	0	0	-1	0	0	0	0	0	0	1	0	0	0	0	0	0	1	1	0	0	0	4	3	1	19
LTR71A:ERV1:LTR	0	0	0	0	-1	0	0	0	0	0	0	1	0	0	0	0	0	0	1	1	0	0	0	4	3	1	19
LTR40A1:ERVL:LTR	0	0	0	0	-1	1	-1	0	0	0	0	1	0	0	0	0	0	0	1	0	0	0	0	5	3	2	18
tRNA-Tyr-TAC:tRNA:tRNA	0	0	0	0	0	0	0	0	0	0	0	1	1	0	0	0	0	0	1	0	0	0	0	3	3	0	20
MARE6:L1-Tx1:LINE	1	0	0	0	-1	0	0	0	0	0	0	1	0	0	0	0	0	0	1	-1	0	0	0	5	3	2	18
LTR35A:ERV1:LTR	0	0	0	0	0	0	0	0	0	0	0	1	0	0	0	0	0	0	1	1	0	0	0	3	3	0	20
LTR24C:ERV1:LTR	0	0	0	0	-1	0	0	0	0	0	0	1	0	0	0	0	0	0	1	1	0	0	0	4	3	1	19
LTR52:ERVL:LTR	0	0	0	0	0	-1	0	0	0	0	0	1	0	0	0	0	0	0	1	1	0	0	0	4	3	1	19
Charlie16:hAT-Charlie:DNA	0	0	0	0	-1	0	-1	0	0	0	-1	1	1	0	0	-1	0	0	1	0	0	0	0	7	3	4	16
Zaphod3:hAT-Tip100:DNA	0	0	0	0	-1	0	0	0	0	0	0	1	0	0	0	0	0	0	1	1	0	0	0	4	3	1	19
MER83A-int:ERV1:LTR	0	0	0	0	0	1	-1	0	0	0	0	1	0	0	0	0	0	0	1	0	0	0	0	4	3	1	19
MER41G:ERV1:LTR	0	0	0	0	0	0	0	0	0	0	0	1	0	0	0	0	0	0	1	1	0	0	0	3	3	0	20
UCON73:hAT:DNA	0	0	0	0	0	0	0	0	0	0	0	1	0	0	0	0	0	0	1	1	0	0	0	3	3	0	20
MER106B:hAT-Charlie:DNA	0	0	0	0	-1	1	0	0	0	0	-1	1	0	0	0	0	0	0	1	0	0	0	0	5	3	2	18
Charlie30a:hAT-Charlie:DNA	0	0	0	0	-1	1	0	0	0	0	0	1	0	0	0	0	0	0	1	0	0	0	0	4	3	1	19
UCON40:TcMar-Mariner:DNA	0	0	0	0	-1	1	0	0	0	0	0	1	0	0	0	0	0	0	1	0	0	0	0	4	3	1	19
MER9a3:ERVK:LTR	-1	0	0	0	-1	0	0	0	0	0	0	1	0	0	0	0	0	0	1	1	0	0	0	5	3	2	18
Eulor9A:DNA:DNA	0	0	0	0	-1	1	0	0	0	0	0	1	0	0	0	0	0	0	0	1	0	0	0	4	3	1	19
LTR10D:ERV1:LTR	0	0	0	0	-1	0	0	0	0	0	0	1	1	0	0	0	0	0	1	-1	0	0	0	5	3	2	18
MER97b:hAT-Tip100:DNA	0	0	0	0	0	0	0	-1	0	0	0	1	0	0	0	0	0	0	1	1	0	0	0	4	3	1	19
LTR35B:ERV1:LTR	0	1	-1	0	-1	0	0	0	0	0	0	1	0	0	0	0	0	0	1	-1	0	0	0	6	3	3	17
Tigger3d:TcMar-Tigger:DNA	0	0	0	0	-1	0	0	0	0	0	0	1	0	0	0	0	0	0	1	1	0	0	0	4	3	1	19
Charlie14a:hAT-Charlie:DNA	0	0	0	0	-1	1	0	0	0	0	0	1	0	0	0	0	0	0	1	0	0	0	0	4	3	1	19
Charlie25:hAT-Charlie:DNA	0	0	0	0	0	0	0	0	0	0	0	1	0	0	0	0	0	0	1	1	0	0	0	3	3	0	20
U4:snRNA:snRNA	0	0	0	0	-1	1	0	0	0	0	0	1	0	0	0	1	0	0	0	-1	0	0	0	5	3	2	18
LTR38:ERV1:LTR	0	0	0	0	0	0	0	0	0	0	-1	1	0	0	0	0	0	0	1	1	0	0	0	4	3	1	19
LTR80B:ERVL:LTR	0	1	0	0	-1	0	-1	0	0	0	0	1	0	0	0	0	0	0	1	-1	0	0	0	6	3	3	17
Charlie23a:hAT-Charlie:DNA	0	0	0	0	-1	0	0	0	0	0	0	1	0	0	0	0	0	0	1	1	0	0	0	4	3	1	19
hAT-4b_Ther:hAT-Tip100:DNA	0	0	0	0	0	0	0	0	0	0	0	1	0	0	0	0	0	0	1	1	0	0	0	3	3	0	20
hAT-N1a_Mam:hAT-Tip100:DNA	0	0	0	0	0	0	0	0	0	0	-1	1	0	0	0	0	0	0	1	1	0	0	0	4	3	1	19
UCON28a:Unknown:Unknown	0	0	0	0	0	1	0	0	0	0	0	1	0	0	0	0	0	0	1	0	0	0	0	3	3	0	20
MER61D:ERV1:LTR	0	0	0	0	-1	1	0	0	0	0	0	1	0	0	0	0	0	0	1	0	0	0	0	4	3	1	19
MER5C:hAT-Charlie:DNA	0	0	0	0	-1	1	0	0	0	0	0	1	0	0	0	0	0	0	1	0	0	0	0	4	3	1	19
MER110A:ERV1:LTR	0	0	0	0	-1	1	0	0	0	0	0	1	0	0	0	0	0	0	1	0	0	0	0	4	3	1	19
LTR15:ERV1:LTR	0	0	0	0	0	1	0	0	0	0	0	1	0	0	0	0	0	0	1	0	0	0	0	3	3	0	20
MER130:DNA:DNA	0	0	0	0	-1	1	0	0	0	0	0	1	0	0	0	0	0	0	1	-1	0	0	0	5	3	2	18
MER34-int:ERV1:LTR	0	0	0	0	-1	0	0	0	0	0	0	1	0	0	0	0	0	0	1	0	0	0	1	4	3	1	19
MER90a:ERV1:LTR	0	0	0	0	-1	0	0	0	0	0	0	1	0	0	0	0	0	0	1	1	0	0	0	4	3	1	19
HERVK9-int:ERVK:LTR	0	0	0	0	-1	0	0	0	0	0	0	1	0	0	0	0	0	0	1	1	0	0	0	4	3	1	19
LTR86C:ERVL:LTR	0	0	0	0	-1	1	0	0	0	0	0	1	0	0	0	0	0	0	1	0	0	0	0	4	3	1	19
LTR49:ERV1:LTR	0	0	0	0	-1	0	0	0	0	0	0	1	1	0	0	0	0	0	1	0	0	0	0	4	3	1	19
MER133A:DNA?:DNA?	0	0	0	0	0	1	0	0	0	0	0	1	0	0	0	0	0	0	1	0	0	0	0	3	3	0	20
MER92-int:ERV1:LTR	0	0	0	1	-1	0	0	0	0	0	0	1	0	0	0	0	0	0	1	-1	0	-1	0	6	3	3	17
LTR45:ERV1:LTR	0	0	0	0	0	0	0	0	0	0	0	1	0	0	0	0	0	0	1	1	0	0	0	3	3	0	20
L2-1_AMi:L2:LINE	0	0	0	0	-1	1	0	0	0	0	0	1	0	0	0	0	0	0	1	0	0	0	0	4	3	1	19
LTR1D1:ERV1:LTR	0	0	0	0	0	0	0	0	0	0	0	1	1	0	0	0	0	0	1	-1	0	0	0	4	3	1	19
MER61E:ERV1:LTR	0	1	0	0	-1	0	0	0	0	0	0	1	0	0	0	0	0	0	1	-1	0	0	0	5	3	2	18
MSTC-int:ERVL-MaLR:LTR	0	0	0	0	-1	0	0	0	0	0	0	1	0	0	0	0	0	0	1	1	0	0	0	4	3	1	19
HAL1b:L1:LINE	0	0	0	0	-1	0	0	0	0	0	0	1	0	0	0	0	0	0	1	1	0	0	0	4	3	1	19
LTR16A2:ERVL:LTR	0	0	0	0	0	0	0	0	0	0	-1	1	1	0	0	0	0	0	1	0	0	0	0	4	3	1	19
ORSL-2b:hAT-Tip100:DNA	0	0	0	0	-1	1	-1	0	0	0	0	1	0	0	0	0	0	0	1	0	0	0	0	5	3	2	18
LTR10B2:ERV1:LTR	0	1	0	0	0	0	0	0	0	0	0	1	0	0	0	0	0	0	1	0	0	0	0	3	3	0	20
LTR81A:Gypsy:LTR	0	0	0	0	-1	0	0	0	0	0	0	1	0	0	0	0	0	0	1	0	0	0	1	4	3	1	19
LTR55:ERVL?:LTR	0	0	0	0	-1	0	0	0	0	0	0	1	0	0	0	0	0	0	1	1	0	0	0	4	3	1	19
MER76:ERVL:LTR	0	0	0	0	-1	0	-1	0	0	0	0	1	1	0	0	0	0	0	1	0	0	0	0	5	3	2	18
tRNA-Thr-ACG:tRNA:tRNA	0	0	0	0	0	0	0	0	0	1	0	1	0	0	0	0	0	0	0	1	0	0	0	3	3	0	20
AluYa8:Alu:SINE	0	0	0	0	-1	0	-1	0	0	-1	0	1	1	0	0	0	0	0	1	0	0	0	0	6	3	3	17
MER57A1:ERV1:LTR	0	0	0	0	-1	0	0	0	0	0	0	1	0	0	0	0	0	0	1	1	0	0	0	4	3	1	19
MLT1L-int:ERVL-MaLR:LTR	0	0	0	0	0	0	0	0	0	0	0	1	0	0	0	0	0	0	1	1	0	0	0	3	3	0	20
LTR80A:ERVL:LTR	0	0	0	0	-1	0	0	0	0	0	0	1	0	0	0	0	0	0	1	1	0	0	0	4	3	1	19
HY1:scRNA:scRNA	-1	0	0	0	-1	0	0	0	0	0	0	1	1	0	0	0	0	0	0	1	0	0	0	5	3	2	18
MER112:hAT-Charlie:DNA	0	0	0	0	-1	0	0	0	0	0	0	1	0	0	0	0	0	0	1	1	0	0	0	4	3	1	19
LTR43-int:ERV1:LTR	0	0	0	0	-1	-1	0	0	0	0	0	1	0	0	0	0	0	0	1	1	0	0	0	5	3	2	18
MLT1C2-int:ERVL-MaLR:LTR	0	1	0	0	-1	0	0	0	0	0	0	1	0	0	0	0	0	0	1	0	0	0	0	4	3	1	19
MLT1E1A-int:ERVL-MaLR:LTR	0	0	0	0	0	0	0	0	0	0	0	1	0	0	0	0	0	0	1	1	0	0	0	3	3	0	20
LTR81:Gypsy:LTR	0	-1	0	0	-1	1	0	0	0	0	0	1	0	0	0	0	0	0	1	-1	0	0	0	6	3	3	17
L1P4b:L1:LINE	0	0	0	0	0	1	0	0	-1	0	-1	1	0	0	0	0	0	0	0	1	0	0	0	5	3	2	18
tRNA-Gln-CAG:tRNA:tRNA	0	0	0	0	0	0	0	0	0	0	0	1	1	0	0	0	0	0	1	0	0	0	0	3	3	0	20
EUTREP14:Unknown:Unknown	0	0	0	0	0	1	-1	0	0	0	0	1	0	0	0	0	0	0	1	0	0	0	0	4	3	1	19
Charlie20a:hAT-Charlie:DNA	0	0	0	0	-1	0	0	0	0	0	0	1	0	0	0	0	0	0	1	1	0	0	0	4	3	1	19
tRNA-Arg-CGY:tRNA:tRNA	0	0	0	0	0	0	0	0	0	0	0	1	1	0	0	0	0	0	0	1	0	0	0	3	3	0	20
MARE8:DNA:DNA	0	0	0	0	-1	1	0	0	0	0	0	1	0	0	0	0	0	0	1	-1	0	0	0	5	3	2	18
MER91B:hAT-Tip100:DNA	0	0	0	0	-1	-1	1	0	0	0	0	1	0	0	0	0	0	0	1	0	0	0	0	5	3	2	18
Charlie10a:hAT-Charlie:DNA	0	0	0	0	-1	-1	0	0	0	0	1	1	0	0	0	-1	0	0	0	1	0	0	0	6	3	3	17
UCON26:hAT:DNA	0	0	0	0	-1	1	0	0	0	0	0	1	0	0	0	0	0	0	1	0	0	0	0	4	3	1	19
UCON99:DNA:DNA	0	0	0	0	0	1	0	0	0	0	0	0	0	0	0	0	0	0	1	1	0	0	0	3	3	0	20
L1MEg2:L1:LINE	0	0	0	0	-1	0	0	0	0	0	-1	1	0	0	0	1	0	0	1	-1	0	0	0	6	3	3	17
MER121:hAT:DNA	0	0	0	0	-1	1	0	0	0	0	0	1	0	0	0	0	0	0	1	0	0	0	0	4	3	1	19
MER66C:ERV1:LTR	0	0	0	0	-1	1	0	0	0	0	0	1	0	0	0	0	0	0	1	0	0	0	0	4	3	1	19
LTR52-int:ERVL:LTR	1	0	0	0	0	0	0	-1	0	0	0	1	0	0	0	0	0	0	1	0	0	0	0	4	3	1	19
LTR38B:ERV1:LTR	0	1	0	0	0	0	0	0	0	0	0	1	0	0	0	-1	0	0	1	0	0	0	0	4	3	1	19
UCON33:TcMar-Tigger:DNA	0	1	0	0	0	0	0	0	0	-1	0	1	0	0	0	0	0	0	1	0	0	0	0	4	3	1	19
Kanga1a:TcMar-Tc2:DNA	0	0	0	0	-1	0	0	0	0	0	-1	1	0	0	0	0	0	0	1	1	0	0	0	5	3	2	18
L1P4a:L1:LINE	0	0	0	0	-1	0	0	0	0	0	0	1	0	0	0	0	0	0	1	0	1	0	0	4	3	1	19
L1PA16:L1:LINE	0	0	0	0	-1	1	-1	0	0	0	-1	1	0	0	0	0	0	0	1	0	0	0	0	6	3	3	17
MamGypsy2-LTR:Gypsy:LTR	0	0	0	0	0	1	0	0	0	0	0	1	0	0	0	0	0	0	1	0	0	0	0	3	3	0	20
LSAU:Satellite:Satellite	0	0	0	0	0	-1	0	0	0	0	0	1	1	0	0	0	0	0	0	1	0	0	0	4	3	1	19
MER94B:hAT-Blackjack:DNA	0	0	0	0	-1	0	0	0	0	0	0	1	0	0	0	0	0	0	1	1	0	0	0	4	3	1	19
HERVL74-int:ERVL:LTR	0	0	0	0	0	-1	-1	-1	0	0	0	1	0	0	0	0	0	0	1	1	-1	0	0	7	3	4	16
LTR86A1:ERVL:LTR	1	0	0	0	-1	0	0	0	0	0	0	1	0	0	0	0	0	0	1	-1	0	0	0	5	3	2	18
MER74C:ERVL:LTR	0	0	0	0	0	0	0	0	0	0	0	1	0	0	0	0	0	0	1	1	0	0	0	3	3	0	20
MER74B:ERVL:LTR	0	0	0	0	-1	0	0	0	0	0	0	1	1	0	0	0	0	0	1	0	0	0	0	4	3	1	19
LTR27:ERV1:LTR	0	0	0	0	-1	1	0	0	0	0	0	1	0	0	0	0	0	0	1	0	0	0	0	4	3	1	19
MamTip1:hAT-Tip100:DNA	0	0	0	0	-1	0	0	-1	0	0	0	1	0	0	0	0	0	0	1	1	0	0	0	5	3	2	18
LTR1C1:ERV1:LTR	0	0	0	0	0	0	0	0	0	0	0	1	0	0	0	0	0	0	1	0	0	0	1	3	3	0	20
Charlie17b:hAT-Charlie:DNA	0	0	0	0	-1	0	0	0	0	0	0	0	0	0	0	0	0	0	1	1	1	0	0	4	3	1	19
UCON47:Unknown:Unknown	0	0	0	0	0	0	0	0	0	0	0	1	0	0	0	0	0	0	1	1	0	0	0	3	3	0	20
MLT1E1:ERVL-MaLR:LTR	0	0	0	0	-1	1	0	0	0	0	0	1	0	0	0	0	0	0	1	0	0	0	0	4	3	1	19
MER34D:ERV1:LTR	1	0	0	0	-1	0	0	0	0	0	0	1	0	0	0	0	0	0	1	0	0	0	0	4	3	1	19
MSTA-int:ERVL-MaLR:LTR	0	0	-1	0	-1	1	0	0	0	0	-1	1	0	0	0	0	0	0	1	0	0	0	0	6	3	3	17
MER4D0:ERV1:LTR	0	0	0	0	-1	0	0	0	0	0	0	1	0	0	0	0	0	0	1	1	0	0	0	4	3	1	19
LTR10B1:ERV1:LTR	-1	0	0	0	-1	1	0	0	0	0	0	1	0	0	0	0	0	0	1	0	0	0	0	5	3	2	18
LTR47B4:ERVL:LTR	1	0	0	0	-1	0	0	0	0	0	0	1	0	0	0	0	0	0	1	0	0	0	0	4	3	1	19
MER44A:TcMar-Tigger:DNA	0	0	0	0	-1	0	0	0	0	0	-1	1	0	0	0	0	0	0	1	1	0	0	0	5	3	2	18
MER126:DNA:DNA	0	0	0	0	-1	0	0	0	0	0	0	1	0	0	0	0	0	0	1	1	0	0	0	4	3	1	19
MER4E:ERV1:LTR	0	0	0	0	-1	0	0	0	0	0	0	1	1	0	0	0	0	0	1	0	0	0	0	4	3	1	19
UCON31:Unknown:Unknown	1	0	0	0	0	0	0	0	-1	0	0	1	0	0	0	0	0	0	1	0	0	0	0	4	3	1	19
MLT1-int:ERVL-MaLR:LTR	0	0	0	0	-1	1	0	0	0	0	0	1	0	0	0	0	0	0	1	-1	0	0	0	5	3	2	18
L1M2b:L1:LINE	0	0	0	0	-1	1	0	0	0	0	0	1	0	0	0	0	0	0	1	-1	0	0	0	5	3	2	18
X2b_DNA:DNA:DNA	0	0	0	0	0	0	0	0	0	0	0	1	0	0	0	0	0	0	1	1	0	0	0	3	3	0	20
hAT-N1_Mam:hAT-Tip100?:DNA	0	0	0	0	-1	0	0	0	0	0	0	1	0	0	0	0	0	0	1	1	0	0	0	4	3	1	19
MamRep1894:hAT:DNA	0	0	0	0	-1	1	-1	0	0	0	0	1	0	0	0	0	0	0	1	0	0	0	0	5	3	2	18
X4b_DNA:TcMar:DNA	0	0	0	0	-1	0	0	0	0	0	0	1	0	0	0	0	0	0	1	1	-1	0	0	5	3	2	18
Cheshire:hAT-Charlie:DNA	0	0	0	0	-1	0	0	0	0	0	0	1	0	0	0	0	0	0	1	1	0	0	0	4	3	1	19
MLT1E3-int:ERVL-MaLR:LTR	0	0	0	0	0	0	0	0	0	0	0	1	0	0	0	0	0	0	1	-1	0	0	1	4	3	1	19
LTR90A:LTR:LTR	0	0	0	0	-1	0	0	0	0	0	0	1	0	0	0	0	0	0	1	1	0	0	0	4	3	1	19
EUTREP4:PiggyBac?:DNA?	0	0	0	0	0	1	0	0	0	0	0	1	0	0	0	0	0	0	1	0	0	0	0	3	3	0	20
(CATTC)n:Satellite:Satellite	-1	0	0	0	0	-1	0	0	0	0	-1	1	0	0	0	0	0	0	1	0	1	0	-1	7	3	4	16
L1M2c:L1:LINE	0	0	0	0	-1	0	0	0	0	0	0	1	1	0	0	0	0	0	1	-1	0	0	0	5	3	2	18
TAR1:telo:Satellite	1	0	0	0	-1	-1	0	0	0	0	-1	1	1	0	0	0	0	0	0	0	0	0	0	6	3	3	17
AmnSINE1:5S-Deu-L2:SINE	1	0	0	0	0	0	0	0	0	0	0	1	0	0	0	0	0	0	1	0	0	0	0	3	3	0	20
LTR46-int:ERV1:LTR	0	0	0	0	-1	0	0	0	0	0	0	1	0	0	0	0	0	0	1	1	0	0	0	4	3	1	19
UCON89:hAT?:DNA	0	0	0	0	0	1	0	0	0	0	0	0	0	0	0	1	0	0	1	0	0	0	0	3	3	0	20
UCON39:TcMar-Tigger:DNA	0	0	0	0	-1	1	0	-1	0	0	0	1	0	0	0	0	0	0	1	-1	0	0	0	6	3	3	17
MLT1E2:ERVL-MaLR:LTR	0	-1	0	0	-1	1	0	0	0	0	0	1	0	0	0	0	0	0	1	0	0	0	0	5	3	2	18
UCON101:Unknown:Unknown	0	0	0	0	0	1	0	0	0	0	0	1	0	0	0	0	0	0	1	0	0	0	0	3	3	0	20
UCON64:Unknown:Unknown	0	0	0	0	0	1	0	0	0	0	0	1	0	0	0	0	0	0	1	-1	0	0	0	4	3	1	19
X8_LINE:CR1:LINE	0	0	0	0	0	1	0	0	0	0	0	1	0	0	0	0	0	0	1	0	0	0	0	3	3	0	20
LTR27D:ERV1:LTR	0	0	0	0	-1	1	-1	0	0	0	0	1	0	0	0	0	0	0	1	0	0	0	0	5	3	2	18
AluYk12:Alu:SINE	-1	0	0	0	-1	-1	0	0	0	0	0	1	1	0	0	0	0	0	1	0	0	0	0	6	3	3	17
LTR31:ERV1:LTR	0	0	0	0	0	0	0	0	0	0	0	1	0	0	0	0	0	0	1	1	0	0	0	3	3	0	20
AluYf1:Alu:SINE	0	0	0	0	-1	0	0	0	0	0	0	1	1	0	0	0	0	0	1	0	0	0	0	4	3	1	19
Ricksha_a:MULE-MuDR:DNA	0	0	0	0	-1	0	0	0	0	0	1	1	0	0	0	0	0	0	1	0	0	0	0	4	3	1	19
MER89-int:ERV1:LTR	0	0	0	0	-1	0	-1	0	0	0	0	1	1	0	0	0	0	0	1	-1	0	0	0	6	3	3	17
GSATII:centr:Satellite	1	0	0	0	0	-1	0	-1	0	0	-1	1	1	0	0	0	0	0	0	0	0	0	0	6	3	3	17
X33a_DNA:TcMar-Tc1:DNA	0	0	0	0	0	0	0	0	0	0	0	1	0	0	0	0	0	0	1	1	0	0	0	3	3	0	20
LTR64:ERV1:LTR	0	0	0	0	-1	0	0	0	0	0	0	1	1	0	0	0	0	0	1	0	0	0	0	4	3	1	19
L1MEg1:L1:LINE	0	0	0	0	-1	0	-1	0	0	0	0	1	0	0	0	0	0	0	1	1	0	0	0	5	3	2	18
MLT1G1-int:ERVL-MaLR:LTR	0	0	0	0	-1	0	0	0	0	0	0	1	0	0	0	0	0	0	1	1	0	0	0	4	3	1	19
LTR107_Mam:LTR:LTR	0	0	0	0	0	0	0	0	0	0	0	1	0	0	0	0	0	0	1	1	0	0	0	3	3	0	20
L2-1_Crp:L2:LINE	-1	0	0	0	1	-1	0	0	0	0	0	0	0	0	0	0	0	0	0	1	-1	1	0	6	3	3	17
X2a_DNA:DNA:DNA	0	0	0	0	-1	1	0	0	0	0	0	1	0	0	0	0	0	0	1	0	0	0	0	4	3	1	19
MER74A:ERVL:LTR	0	0	0	0	-1	0	0	0	0	0	-1	1	0	0	0	0	0	0	1	1	0	0	0	5	3	2	18
LTR51:ERV1:LTR	0	0	0	0	-1	0	0	0	0	0	-1	1	0	0	0	0	0	0	1	1	0	0	0	5	3	2	18
(GAATG)n:Satellite:Satellite	0	0	0	0	0	-1	1	-1	0	0	-1	1	0	0	0	0	0	0	1	0	0	0	0	6	3	3	17
Tigger5b:TcMar-Tigger:DNA	0	0	0	0	-1	0	0	0	0	0	0	1	0	0	0	0	0	0	1	1	0	0	0	4	3	1	19
LTR75:ERVL:LTR	0	0	0	0	-1	0	0	1	0	0	0	1	0	0	0	0	0	0	1	0	0	0	0	4	3	1	19
MER61F:ERV1:LTR	0	0	0	0	-1	0	0	0	0	0	1	1	0	0	0	0	0	0	1	0	0	0	0	4	3	1	19
LTR22C0:ERVK:LTR	0	0	0	0	-1	0	0	0	0	0	0	1	0	0	0	0	0	0	1	1	0	0	0	4	3	1	19
L2-2_Mam:L2:LINE	0	0	0	0	0	0	0	0	0	0	0	1	0	0	0	0	0	0	1	1	0	0	0	3	3	0	20
LTR1A1:ERV1:LTR	0	0	0	0	0	1	-1	0	0	0	0	1	0	0	0	0	0	0	1	0	0	0	0	4	3	1	19
Charlie12:hAT-Charlie:DNA	0	0	0	0	0	0	0	0	1	0	0	1	0	0	0	0	0	0	0	1	0	0	0	3	3	0	20
7SK:RNA:RNA	0	0	0	0	-1	0	0	0	0	0	0	1	1	0	0	0	0	0	1	0	0	0	0	4	3	1	19
LTR26D:ERV1:LTR	-1	1	0	0	0	-1	0	0	0	0	0	1	0	0	0	-1	0	0	1	0	0	0	0	6	3	3	17
X7C_LINE:CR1:LINE	0	0	0	0	-1	0	0	0	0	0	0	1	0	0	0	0	0	0	1	1	0	0	0	4	3	1	19
MER11D:ERVK:LTR	0	0	0	0	-1	0	1	0	0	0	0	1	0	0	0	0	0	0	1	0	0	0	0	4	3	1	19
Tigger21a:TcMar-Tigger:DNA	0	0	0	0	-1	1	0	0	0	0	0	1	0	0	0	0	0	0	0	1	0	0	0	4	3	1	19
L1MD:L1:LINE	0	0	0	0	-1	0	0	0	0	0	0	1	0	0	0	0	0	0	1	1	0	0	0	4	3	1	19
Eutr5:LTR?:LTR?	0	0	0	0	-1	0	0	0	0	0	0	1	0	0	0	1	0	0	1	0	0	0	0	4	3	1	19
MER66-int:ERV1:LTR	0	0	0	0	-1	0	0	0	0	0	0	1	1	0	0	0	0	0	1	0	0	0	0	4	3	1	19
ORSL:hAT-Tip100:DNA	0	0	0	0	-1	1	0	0	0	0	0	1	0	0	0	0	0	0	1	0	0	0	0	4	3	1	19
L1ME3B:L1:LINE	1	0	0	0	-1	0	0	0	0	0	0	1	0	0	0	0	0	0	1	0	0	0	0	4	3	1	19
PABL_B:ERV1:LTR	0	0	0	0	-1	1	0	0	0	0	0	1	0	0	0	0	0	0	1	-1	0	0	0	5	3	2	18
Eulor2A:DNA?:DNA?	0	0	0	0	0	1	0	0	0	0	0	0	0	0	0	0	0	0	1	1	0	0	0	3	3	0	20
FordPrefect_a:hAT-Tip100:DNA	0	0	0	0	-1	1	0	0	0	0	0	1	0	0	0	0	0	0	1	-1	0	0	0	5	3	2	18
LTR68:ERV1:LTR	0	1	0	0	-1	0	0	0	0	0	0	1	0	0	0	0	0	0	1	0	0	0	0	4	3	1	19
MER11A:ERVK:LTR	0	0	0	0	-1	0	0	0	0	0	-1	1	0	0	0	0	0	0	1	0	0	1	0	5	3	2	18
MLT1H1-int:ERVL-MaLR:LTR	0	0	0	0	-1	0	0	0	0	0	-1	1	0	0	0	0	0	0	1	1	0	0	0	5	3	2	18
CR1-12_AMi:CR1:LINE	0	0	0	0	0	0	0	0	0	0	0	1	0	0	0	0	0	0	1	1	0	0	0	3	3	0	20
MER92D:ERV1:LTR	0	0	0	0	-1	0	0	0	0	0	0	1	0	0	0	0	0	0	1	1	0	0	0	4	3	1	19
HERVFH21-int:ERV1:LTR	0	0	0	0	-1	0	-1	0	0	0	0	1	0	0	0	0	0	0	1	-1	1	0	0	6	3	3	17
Chap1_Mam:hAT-Charlie:DNA	0	0	0	0	-1	0	0	0	0	0	0	1	0	0	0	0	0	0	1	1	0	0	0	4	3	1	19
MER50-int:ERV1:LTR	0	0	0	0	-1	-1	0	0	0	0	0	1	0	0	0	-1	0	0	1	1	0	0	0	6	3	3	17
MER97d:hAT-Tip100:DNA	0	0	0	0	-1	0	0	0	0	0	0	1	0	0	0	0	0	0	1	1	0	0	0	4	3	1	19
LTR27E:ERV1:LTR	0	0	0	0	0	0	0	0	0	0	0	1	0	0	0	0	0	0	1	1	0	0	0	3	3	0	20
ERVL47-int:ERVL:LTR	0	0	0	0	-1	-1	0	0	0	0	0	1	0	0	0	0	0	0	1	0	1	0	0	5	3	2	18
PRIMA4_LTR:ERV1:LTR	0	0	0	0	-1	1	0	0	0	0	0	1	0	0	0	0	0	0	1	-1	0	0	0	5	3	2	18
LTR25:ERV1:LTR	0	0	0	0	-1	0	-1	0	0	0	0	1	0	0	0	0	1	0	1	0	0	0	0	5	3	2	18
LTR27C:ERV1:LTR	0	0	0	0	0	0	0	0	0	0	0	1	0	0	0	0	0	0	1	1	0	0	0	3	3	0	20
Kanga1:TcMar-Tc2:DNA	0	0	-1	0	-1	1	0	0	0	0	-1	1	0	0	0	0	0	0	1	0	0	0	0	6	3	3	17
MER96:hAT-Tip100:DNA	0	0	0	0	-1	0	0	0	0	0	0	1	0	0	0	0	0	0	1	0	1	0	0	4	3	1	19
Ricksha:MULE-MuDR:DNA	0	0	0	0	-1	0	0	0	0	0	0	1	0	0	0	0	0	0	1	1	0	0	0	4	3	1	19
MLT2C2:ERVL:LTR	1	0	0	0	-1	0	-1	-1	0	0	0	1	0	0	0	0	0	0	1	0	0	0	0	6	3	3	17
Charlie11:hAT-Charlie:DNA	0	0	0	0	0	0	0	0	0	0	0	1	0	0	0	0	0	0	1	1	0	0	0	3	3	0	20
LTR44:ERV1:LTR	0	1	0	0	-1	0	0	0	0	0	0	1	0	0	0	0	0	0	1	-1	0	0	0	5	3	2	18
LTR14:ERVK:LTR	0	0	0	0	-1	0	0	0	0	0	0	1	1	0	0	0	0	0	1	0	0	0	0	4	3	1	19
X1_DNA:TcMar-Tigger:DNA	0	0	0	0	-1	0	0	0	0	0	0	1	0	0	0	0	0	0	1	1	0	0	0	4	3	1	19
LTR1:ERV1:LTR	0	0	-1	0	0	0	0	0	0	0	0	1	0	0	0	0	0	0	1	1	0	0	0	4	3	1	19
UCON1:Unknown:Unknown	0	0	0	0	0	1	0	0	0	0	0	1	0	0	0	0	0	0	1	0	0	0	0	3	3	0	20
HSAT5:Satellite:Satellite	0	0	-1	0	-1	0	0	0	0	0	0	1	0	0	0	0	0	0	1	1	0	0	0	5	3	2	18
LTR26E:ERV1:LTR	0	0	0	0	-1	0	0	0	0	0	0	1	0	0	0	0	0	0	1	1	0	0	0	4	3	1	19
MER61A:ERV1:LTR	0	0	0	0	-1	1	0	0	0	0	0	1	0	0	0	0	0	0	1	0	0	0	0	4	3	1	19
MER87B:ERV1:LTR	0	0	0	0	-1	1	0	0	0	0	0	1	0	0	0	0	0	0	1	0	0	0	0	4	3	1	19
L1PA10:L1:LINE	0	0	0	0	-1	0	0	0	0	0	-1	1	0	0	0	0	0	0	1	1	0	0	0	5	3	2	18
tRNA-Ser-AGY:tRNA:tRNA	0	0	0	0	0	0	0	0	0	0	0	0	1	0	0	0	0	0	1	1	0	0	0	3	3	0	20
Tigger7:TcMar-Tigger:DNA	0	0	0	0	-1	-1	0	0	0	0	0	1	0	0	0	0	0	0	1	1	0	0	0	5	3	2	18
LTR43B:ERV1:LTR	0	0	0	0	0	0	0	0	0	0	0	1	0	0	0	0	0	0	1	1	0	0	0	3	3	0	20
LTR76:ERV1:LTR	-1	0	0	0	-1	0	-1	1	0	0	0	1	0	0	0	0	0	0	1	0	0	0	0	6	3	3	17
MER72B:ERV1:LTR	0	-1	0	0	-1	0	0	0	0	0	0	1	1	0	0	0	0	0	1	0	0	0	0	5	3	2	18
Tigger3a:TcMar-Tigger:DNA	0	0	0	0	-1	0	0	0	0	0	0	1	0	0	0	0	0	0	1	1	0	0	0	4	3	1	19
HERVL66-int:ERVL:LTR	0	0	0	0	0	-1	0	0	0	0	0	1	0	0	0	0	0	0	1	0	1	-1	0	5	3	2	18
L1PA12:L1:LINE	0	0	-1	0	-1	0	0	0	0	0	0	1	1	0	0	0	0	0	1	-1	0	0	0	6	3	3	17
LTR9A1:ERV1:LTR	0	0	0	0	-1	0	0	0	0	0	0	1	0	0	0	0	0	0	1	1	0	0	0	4	3	1	19
AmnHarb1:Harbinger:DNA	0	0	0	0	0	1	0	0	0	0	0	1	0	0	0	0	0	0	1	0	0	0	0	3	3	0	20
L1MA6:L1:LINE	0	0	0	0	-1	1	0	0	0	0	0	1	0	0	0	0	0	0	1	0	0	0	0	4	3	1	19
X6B_LINE:CR1:LINE	0	0	0	0	0	1	0	0	0	0	0	1	0	0	0	0	0	0	1	0	0	0	0	3	3	0	20
MER61B:ERV1:LTR	0	0	0	0	-1	1	0	0	0	0	0	1	0	0	0	0	0	0	1	0	0	0	0	4	3	1	19
MSTB1-int:ERVL-MaLR:LTR	0	0	0	0	-1	0	0	0	0	0	0	1	0	0	0	0	0	0	1	1	0	0	0	4	3	1	19
MER54B:ERVL:LTR	0	0	0	0	0	0	0	0	0	0	0	1	0	0	0	0	0	0	1	1	0	0	0	3	3	0	20
UCON85:Unknown:Unknown	0	0	0	0	1	-1	0	0	0	0	0	1	0	0	0	0	0	0	1	0	0	0	0	4	3	1	19
L1P5:L1:LINE	0	0	0	0	0	1	-1	0	0	0	0	1	0	0	0	0	0	0	1	-1	0	0	0	5	3	2	18
MER83:ERV1:LTR	0	0	0	0	-1	0	0	0	0	0	0	1	0	0	0	0	0	0	1	1	0	0	0	4	3	1	19
Arthur1A:hAT-Tip100:DNA	0	0	0	0	-1	1	0	0	0	0	0	1	0	0	0	0	0	0	1	0	0	0	0	4	3	1	19
LTR2752:ERV1:LTR	0	0	0	0	-1	1	0	0	0	-1	0	1	0	0	0	0	0	0	1	0	0	0	0	5	3	2	18
MER110-int:ERV1:LTR	-1	0	0	0	-1	1	0	0	0	0	0	1	0	0	0	0	0	0	1	0	0	0	0	5	3	2	18
LTR88c:Gypsy?:LTR	0	0	0	0	-1	1	-1	0	0	0	0	1	0	0	0	0	0	0	1	0	0	0	0	5	3	2	18
AluYi6:Alu:SINE	0	0	0	0	-1	0	0	0	0	0	0	1	1	0	0	0	0	0	1	0	0	0	0	4	3	1	19
MER70C:ERVL:LTR	0	0	0	0	-1	0	0	0	0	0	0	1	0	0	0	0	0	0	1	1	0	0	0	4	3	1	19
MER61C:ERV1:LTR	0	0	0	0	-1	0	0	0	0	0	0	1	0	0	0	0	0	0	1	1	0	0	0	4	3	1	19
MARE10:TcMar-Tigger:DNA	0	0	0	0	-1	-1	0	0	0	0	0	1	0	0	0	-1	0	0	1	1	0	0	0	6	3	3	17
MER57-int:ERV1:LTR	0	0	0	0	-1	0	0	0	0	0	0	1	0	0	0	0	0	0	1	1	0	0	0	4	3	1	19
tRNA-Glu-GAA:tRNA:tRNA	0	0	0	0	-1	0	0	0	0	0	0	0	1	0	0	1	0	0	1	0	0	0	0	4	3	1	19
tRNA-Met-i:tRNA:tRNA	0	0	0	0	0	0	0	0	0	1	0	1	1	0	0	0	0	0	0	0	0	0	0	3	3	0	20
L1P4e:L1:LINE	0	0	0	0	-1	0	0	0	0	0	0	1	0	0	0	0	0	0	1	1	0	0	0	4	3	1	19
Eutr15:hAT-Tip100?:DNA	0	0	0	0	-1	0	-1	0	0	0	0	1	0	0	0	0	0	0	1	1	0	0	0	5	3	2	18
U13:snRNA:snRNA	0	0	0	0	-1	1	0	0	0	0	0	1	0	0	0	0	0	0	1	0	0	0	0	4	3	1	19
L1P4d:L1:LINE	-1	0	0	0	-1	0	-1	0	0	0	0	1	0	0	0	0	0	0	1	1	0	0	0	6	3	3	17
L1MEh:L1:LINE	-1	0	0	0	-1	0	0	0	0	0	0	1	1	0	0	0	0	0	1	0	0	0	0	5	3	2	18
MER5C1:hAT-Charlie:DNA	0	0	0	0	-1	0	0	0	0	0	0	1	0	0	0	0	0	0	1	1	0	0	0	4	3	1	19
UCON35:DNA:DNA	-1	0	0	0	0	1	0	0	0	0	0	1	0	0	0	0	0	0	1	0	0	0	0	4	3	1	19
tRNA-Val-GTG:tRNA:tRNA	-1	0	0	0	0	0	0	0	0	0	0	1	1	0	0	0	0	0	1	0	0	0	0	4	3	1	19
LTR41:ERVL:LTR	0	0	0	0	-1	0	-1	0	0	0	0	1	0	0	0	0	0	0	1	1	0	0	0	5	3	2	18
LTR16E1:ERVL:LTR	0	0	0	0	-1	0	0	0	0	0	0	1	1	0	0	0	0	0	1	0	0	0	0	4	3	1	19
MamRep488:hAT-Tip100:DNA	0	0	0	0	-1	0	0	0	0	0	0	1	0	0	0	0	0	0	1	1	0	0	0	4	3	1	19
L1M2:L1:LINE	0	0	0	0	-1	1	0	0	0	0	0	1	0	0	0	0	0	0	1	0	0	0	0	4	3	1	19
Charlie7a:hAT-Charlie:DNA	0	0	0	0	-1	0	0	0	0	0	0	1	0	0	0	0	0	0	1	1	0	0	0	4	3	1	19
MLT1F2-int:ERVL-MaLR:LTR	0	0	0	0	-1	1	0	0	0	0	0	1	0	0	0	0	0	0	1	0	0	0	0	4	3	1	19
MLT1F-int:ERVL-MaLR:LTR	0	0	0	0	-1	1	0	0	0	0	-1	1	0	0	0	0	0	0	1	0	0	0	0	5	3	2	18
LTR108e_Mam:ERVL:LTR	0	0	0	0	0	0	0	0	0	0	0	1	0	0	0	0	0	0	1	1	0	0	0	3	3	0	20
MSTA1-int:ERVL-MaLR:LTR	0	0	0	0	0	0	0	0	0	0	0	1	0	0	1	0	0	0	1	-1	0	0	0	4	3	1	19
MER95:ERV1:LTR	0	1	0	0	0	0	0	0	0	0	0	1	0	0	0	0	0	0	1	0	0	0	0	3	3	0	20
MLT1D-int:ERVL-MaLR:LTR	1	0	0	0	-1	0	0	0	0	0	-1	1	0	0	0	0	0	0	1	0	0	0	0	5	3	2	18
LTR24B:ERV1:LTR	0	0	0	0	-1	0	0	0	0	0	0	1	0	0	0	0	0	0	1	1	0	0	0	4	3	1	19
LTR22B:ERVK:LTR	0	1	0	0	-1	0	0	0	0	0	0	1	0	0	0	0	0	0	1	-1	0	0	0	5	3	2	18
LTR46:ERV1:LTR	0	1	-1	0	-1	0	0	0	0	0	0	1	0	0	0	0	0	0	1	-1	0	0	0	6	3	3	17
AluYh9:Alu:SINE	0	0	0	0	-1	0	0	0	0	0	0	1	1	0	0	0	0	0	1	0	0	0	0	4	3	1	19
MLT1A0-int:ERVL-MaLR:LTR	0	0	0	0	-1	1	0	0	0	0	0	1	0	0	0	0	0	0	1	-1	0	0	0	5	3	2	18
HSATI:Satellite:Satellite	0	0	0	0	0	-1	0	0	0	1	0	1	0	0	0	0	0	0	1	0	0	0	0	4	3	1	19
MER9a2:ERVK:LTR	0	0	0	0	-1	0	0	-1	0	0	0	1	0	0	0	0	0	0	1	1	0	0	0	5	3	2	18
UCON70:Unknown:Unknown	0	0	0	0	0	0	0	0	0	0	0	0	0	0	0	0	0	0	1	1	0	0	0	2	2	0	21
Charlie6:hAT-Charlie:DNA	0	0	0	0	-1	0	0	0	0	0	0	1	0	0	0	0	0	0	1	0	0	0	0	3	2	1	20
L1M2a1:L1:LINE	0	0	0	0	-1	0	0	0	0	0	0	1	0	0	0	0	0	0	1	0	0	0	0	3	2	1	20
MER51E:ERV1:LTR	0	0	0	0	-1	0	0	0	0	0	0	1	0	0	0	-1	0	0	1	0	0	0	0	4	2	2	19
LTR38-int:ERV1:LTR	0	0	0	0	0	0	0	0	0	0	0	0	0	0	0	0	0	0	1	1	0	0	0	2	2	0	21
LTR10A:ERV1:LTR	0	0	0	0	-1	0	0	0	0	0	0	1	0	0	0	0	0	0	1	0	0	0	0	3	2	1	20
LTR28C:ERV1:LTR	0	0	0	0	-1	0	0	0	0	0	0	1	0	0	0	0	0	0	1	0	0	0	0	3	2	1	20
LTR53B:ERVL:LTR	0	0	0	0	0	0	0	0	0	0	0	1	0	0	0	0	0	0	1	0	0	0	0	2	2	0	21
LTR16B:ERVL:LTR	0	0	0	0	-1	0	0	0	0	0	0	1	0	0	0	0	0	0	1	-1	0	0	0	4	2	2	19
UCON78:DNA:DNA	0	0	0	0	-1	-1	0	0	0	0	0	1	0	0	0	0	0	0	1	0	-1	0	0	5	2	3	18
HERV1_LTRc:ERV1:LTR	0	0	0	0	0	0	0	0	0	0	0	1	0	0	0	0	0	0	1	0	0	0	0	2	2	0	21
UCON87B:Unknown:Unknown	0	0	0	0	-1	0	0	0	0	0	0	1	0	0	0	0	0	0	1	0	0	0	0	3	2	1	20
MSTB2-int:ERVL-MaLR:LTR	0	0	0	0	0	0	0	0	0	0	0	1	0	0	0	0	0	0	1	0	0	0	0	2	2	0	21
UCON83:DNA?:DNA?	0	0	0	0	0	1	0	0	0	0	0	0	0	0	0	0	0	0	1	0	0	0	0	2	2	0	21
MER9B:ERVK:LTR	0	0	0	0	0	0	-1	0	0	0	0	1	0	0	0	0	0	0	1	0	0	0	0	3	2	1	20
Charlie10b:hAT-Charlie:DNA	0	0	0	0	-1	0	0	0	0	0	0	1	0	0	0	0	0	0	1	0	0	0	0	3	2	1	20
UCON29:Kolobok:DNA	0	0	0	0	0	0	0	0	0	0	0	1	0	0	0	0	0	0	1	0	-1	0	0	3	2	1	20
SSU-rRNA_Hsa:rRNA:rRNA	-1	0	0	0	0	0	-1	0	0	0	-1	0	1	0	-1	-1	0	0	0	1	0	0	0	7	2	5	16
tRNA-Thr-ACA:tRNA:tRNA	0	0	0	0	0	0	0	0	0	0	0	1	1	0	0	0	0	0	0	-1	0	0	0	3	2	1	20
LTR73:ERV1:LTR	0	0	0	0	-1	0	0	0	0	0	0	1	0	0	0	0	0	0	1	0	0	0	0	3	2	1	20
Eulor9B:DNA:DNA	0	0	0	0	0	1	0	0	0	0	0	0	0	0	0	0	0	0	0	1	0	0	0	2	2	0	21
X11_DNA:TcMar-Tigger:DNA	0	0	0	0	0	0	0	0	0	-1	0	1	0	0	0	0	0	0	1	0	0	0	0	3	2	1	20
LTR5:ERVK:LTR	-1	0	0	0	-1	0	0	0	0	0	0	1	0	0	0	0	0	0	0	1	0	0	0	4	2	2	19
UCON14:DNA?:DNA?	0	0	0	0	0	1	0	0	0	0	0	0	0	0	0	0	0	0	1	0	0	0	0	2	2	0	21
SVA_E:SVA:Retroposon	0	0	0	0	-1	0	0	0	0	-1	0	1	0	0	0	0	0	0	1	0	0	0	0	4	2	2	19
Tigger17:TcMar-Tigger:DNA	-1	0	0	0	-1	0	0	0	0	0	0	1	0	0	0	0	0	0	1	0	-1	0	0	5	2	3	18
L1P4c:L1:LINE	-1	0	0	0	-1	0	0	0	0	0	0	1	0	0	0	0	0	0	1	0	0	0	0	4	2	2	19
tRNA-Phe-TTY:tRNA:tRNA	0	0	0	0	0	0	0	0	0	0	-1	1	1	0	0	0	0	0	0	0	0	0	0	3	2	1	20
Eulor9C:DNA:DNA	0	-1	0	0	-1	0	0	0	0	0	0	1	0	0	0	0	0	0	1	-1	0	0	0	5	2	3	18
LTR60B:ERV1:LTR	0	0	0	0	0	0	0	0	0	0	0	1	0	0	0	0	0	0	1	-1	0	0	0	3	2	1	20
LTR3:ERVK:LTR	0	0	0	0	-1	0	0	0	0	0	0	1	0	0	0	0	0	0	1	-1	0	0	0	4	2	2	19
Eulor6D:DNA?:DNA?	0	0	0	0	0	0	0	0	0	0	0	1	0	0	0	0	0	0	1	0	0	0	0	2	2	0	21
Tigger17d:TcMar-Tigger:DNA	0	0	0	0	-1	0	0	0	0	0	0	1	0	0	0	0	0	0	1	0	0	0	0	3	2	1	20
MER51C:ERV1:LTR	0	0	0	0	-1	0	-1	0	0	0	-1	1	0	0	0	0	0	0	1	-1	0	0	0	6	2	4	17
MER57E2:ERV1:LTR	0	0	0	0	0	0	0	0	0	0	0	1	0	0	0	0	0	0	1	-1	0	0	0	3	2	1	20
EuthAT-2:hAT-Ac:DNA	0	0	0	0	-1	0	0	0	0	0	0	1	0	0	0	0	0	0	1	0	0	0	0	3	2	1	20
Penelope1_Vert:Penelope:LINE	0	0	0	0	0	0	0	0	0	0	0	1	0	0	0	0	0	0	1	0	0	0	0	2	2	0	21
tRNA-Ile-ATA:tRNA:tRNA	0	0	0	0	0	0	0	0	0	0	0	0	1	0	0	0	0	0	1	0	0	0	0	2	2	0	21
Tigger17c:TcMar-Tigger:DNA	0	0	0	0	-1	-1	0	0	0	0	0	1	0	0	0	0	0	0	1	0	0	0	0	4	2	2	19
LTR1E:ERV1:LTR	0	-1	0	0	-1	0	0	0	0	0	0	1	0	0	0	0	0	0	1	-1	0	0	0	5	2	3	18
tRNA-Arg-CGA:tRNA:tRNA	0	0	0	0	0	0	0	0	0	0	-1	1	1	0	0	0	0	0	0	0	0	0	0	3	2	1	20
L1P3b:L1:LINE	0	1	0	0	-1	0	0	0	0	0	0	1	0	0	0	0	0	0	0	0	0	0	0	3	2	1	20
Merlin1_HS:Merlin:DNA	0	0	0	0	-1	0	0	0	0	0	0	1	0	0	0	0	0	0	1	0	0	0	0	3	2	1	20
Arthur1C:hAT-Tip100:DNA	0	0	0	0	-1	0	0	0	0	0	0	1	0	0	0	0	0	0	1	0	0	0	0	3	2	1	20
MER92A:ERV1:LTR	0	0	0	0	-1	0	0	0	0	0	0	1	0	0	0	0	0	0	1	-1	0	0	0	4	2	2	19
LTR38C:ERV1:LTR	0	0	0	0	-1	0	0	0	0	0	0	1	0	0	0	0	0	0	1	0	0	0	0	3	2	1	20
LTR75B:ERVL:LTR	0	0	0	0	0	0	0	0	0	0	0	1	0	0	0	0	0	0	1	0	0	0	0	2	2	0	21
MER102a:hAT-Charlie:DNA	0	0	0	0	-1	0	0	0	0	0	0	1	0	0	0	0	0	0	1	0	0	0	0	3	2	1	20
MER88:ERVL:LTR	0	0	0	0	0	0	0	0	0	0	0	1	0	0	0	0	0	0	1	-1	0	0	0	3	2	1	20
LTR47A2:ERVL:LTR	0	0	0	0	-1	0	0	0	0	0	-1	1	0	0	0	0	0	0	1	0	0	0	0	4	2	2	19
MER57D:ERV1:LTR	0	0	0	0	-1	-1	0	0	0	0	0	1	0	0	0	0	0	0	1	0	0	0	0	4	2	2	19
X1_LINE:CR1:LINE	0	0	0	0	0	0	0	0	0	0	0	1	0	0	0	0	0	0	1	0	0	0	0	2	2	0	21
Eulor5A:DNA?:DNA?	0	0	0	0	0	0	0	0	0	0	0	0	0	0	0	1	0	0	1	0	-1	0	0	3	2	1	20
AmnSINE2:tRNA-Deu:SINE	0	0	0	0	0	0	0	0	0	0	0	1	0	0	0	0	0	0	1	0	0	0	0	2	2	0	21
X9_LINE:L1:LINE	0	0	0	0	0	0	0	0	0	0	0	1	0	0	0	0	0	0	1	0	0	0	0	2	2	0	21
MER52C:ERV1:LTR	0	0	0	0	-1	0	-1	0	0	0	0	1	0	0	0	0	0	0	1	0	0	0	0	4	2	2	19
MSTA1:ERVL-MaLR:LTR	0	0	0	0	-1	0	0	0	0	0	0	1	0	0	0	0	0	0	1	0	0	0	0	3	2	1	20
X12_LINE:Jockey:LINE	0	0	0	0	0	0	0	0	0	0	0	1	0	0	0	0	0	0	1	0	0	0	0	2	2	0	21
MLT1G3-int:ERVL-MaLR:LTR	0	0	0	0	-1	0	0	0	0	0	0	1	0	0	0	0	0	0	1	0	0	0	0	3	2	1	20
LTR75_1:ERV1:LTR	0	0	0	0	0	0	0	0	0	0	0	1	0	0	0	0	0	0	1	0	0	0	0	2	2	0	21
LTR10B:ERV1:LTR	0	0	0	0	0	0	0	0	0	0	0	1	0	0	0	0	0	0	1	0	0	0	0	2	2	0	21
LTR19-int:ERV1:LTR	0	0	0	0	-1	-1	0	0	0	0	0	1	0	0	0	-1	0	0	1	-1	0	0	0	6	2	4	17
tRNA-Val-GTA:tRNA:tRNA	0	0	0	0	0	0	0	0	0	0	-1	1	1	0	0	0	0	0	0	0	0	0	0	3	2	1	20
LTR47B2:ERVL:LTR	0	0	0	0	-1	0	0	0	0	0	0	1	0	0	0	0	0	0	1	-1	0	0	0	4	2	2	19
LTR18A:ERVL:LTR	0	0	0	0	0	0	0	0	0	0	0	1	0	0	0	0	0	0	1	-1	0	0	0	3	2	1	20
LTR90B:LTR:LTR	0	0	0	0	-1	-1	0	0	0	0	0	1	0	0	0	0	0	0	1	0	0	0	0	4	2	2	19
UCON66:Unknown:Unknown	0	0	0	0	0	0	0	0	0	0	0	1	0	0	0	0	0	0	1	0	0	0	0	2	2	0	21
MER129:LTR?:LTR?	0	0	0	0	-1	0	0	0	0	0	0	1	0	0	0	0	0	0	1	0	0	0	0	3	2	1	20
MLT1N2-int:ERVL-MaLR:LTR	0	0	0	0	0	0	0	0	0	0	0	1	0	0	0	0	0	0	1	0	0	0	0	2	2	0	21
Tigger6:TcMar-Tigger:DNA	0	0	0	0	-1	0	0	0	0	-1	0	1	0	0	0	0	0	0	1	-1	0	0	0	5	2	3	18
LTR82A:ERVL:LTR	0	0	0	0	-1	0	0	0	0	0	0	1	0	0	0	0	0	0	1	-1	0	0	0	4	2	2	19
MER110:ERV1:LTR	0	0	0	0	-1	0	0	0	0	0	0	1	0	0	0	0	0	0	1	0	0	0	0	3	2	1	20
X13_LINE:L2:LINE	0	0	0	0	0	0	0	0	0	0	0	1	0	0	0	0	0	0	1	-1	0	0	0	3	2	1	20
Tigger6b:TcMar-Tigger:DNA	0	0	0	0	-1	0	0	0	0	0	0	1	0	0	0	0	0	0	1	0	0	0	0	3	2	1	20
LTR18C:ERVL:LTR	0	0	0	0	0	1	0	0	0	0	0	1	0	0	0	0	0	0	0	0	0	0	0	2	2	0	21
MER83B:ERV1:LTR	0	0	0	0	-1	1	0	0	0	-1	0	1	0	0	0	0	0	0	0	-1	0	0	0	5	2	3	18
MER65B:ERV1:LTR	0	0	0	0	-1	0	0	0	0	0	0	1	0	0	0	0	0	0	1	-1	0	0	0	4	2	2	19
X15_LINE:L2:LINE	0	0	0	0	0	1	0	0	0	0	0	0	0	0	0	0	0	0	1	-1	0	0	0	3	2	1	20
MER6C:TcMar-Tigger:DNA	0	0	0	0	-1	0	0	0	0	0	0	1	0	0	0	0	0	0	1	0	0	0	0	3	2	1	20
Charlie30b:hAT-Charlie:DNA	0	0	0	0	0	0	0	0	0	0	0	1	0	0	0	0	0	0	1	-1	0	0	0	3	2	1	20
MER75B:PiggyBac:DNA	0	0	0	0	0	0	0	0	0	0	0	1	0	0	0	0	0	0	1	0	0	0	0	2	2	0	21
EuthAT-N1:hAT-Tip100:DNA	0	0	0	0	0	0	0	0	0	0	0	1	0	0	0	0	0	0	1	0	0	0	0	2	2	0	21
MER47C:TcMar-Tigger:DNA	0	0	0	0	-1	0	0	0	0	0	0	1	0	0	0	0	0	0	1	0	0	0	0	3	2	1	20
LTR71B:ERV1:LTR	0	-1	0	0	-1	0	0	0	0	0	0	1	0	0	0	0	0	0	0	1	0	0	0	4	2	2	19
LTR72B:ERV1:LTR	0	0	0	0	0	0	0	0	0	0	0	1	0	0	0	0	0	0	1	0	0	0	0	2	2	0	21
LTR105_Mam:ERVL:LTR	0	0	0	0	-1	0	0	0	0	0	0	1	0	0	0	0	0	0	1	0	0	0	0	3	2	1	20
LTR70:ERV1:LTR	0	0	0	0	-1	0	0	0	0	-1	0	1	0	0	0	0	0	0	1	0	0	0	0	4	2	2	19
UCON60:Unknown:Unknown	0	0	0	0	0	0	0	0	0	0	0	1	0	0	0	0	0	0	1	0	0	0	0	2	2	0	21
L1M4c:L1:LINE	0	0	0	0	-1	0	0	0	0	0	0	1	0	0	0	0	0	0	1	0	0	0	0	3	2	1	20
tRNA-Ser-TCG:tRNA:tRNA	0	0	0	0	0	0	0	0	0	0	0	1	1	0	0	0	0	0	0	0	0	0	0	2	2	0	21
OldhAT1:hAT-Ac:DNA	0	0	0	0	0	0	0	0	0	0	0	1	0	0	0	0	0	0	1	0	0	0	0	2	2	0	21
MER75:PiggyBac:DNA	-1	0	0	0	0	0	0	0	0	0	0	1	0	0	0	0	0	0	1	0	0	0	0	3	2	1	20
MER91C:hAT-Tip100:DNA	0	0	0	0	-1	0	0	0	0	0	0	1	0	0	0	0	0	0	1	0	0	0	0	3	2	1	20
LTR1B1:ERV1:LTR	-1	0	0	0	0	0	0	0	0	0	0	1	0	0	0	0	-1	0	1	-1	0	0	0	5	2	3	18
LTR22:ERVK:LTR	0	0	0	0	-1	0	0	0	0	0	0	1	0	0	0	0	0	0	1	0	0	0	0	3	2	1	20
LTR22E:ERVK:LTR	0	0	0	0	-1	0	0	0	0	0	0	1	0	0	0	0	0	0	1	0	0	0	0	3	2	1	20
MLT1C-int:ERVL-MaLR:LTR	0	0	0	0	-1	0	0	0	0	0	0	1	0	0	0	0	0	0	1	0	0	0	0	3	2	1	20
LTR87:ERVL?:LTR	0	0	0	0	-1	0	0	0	0	0	0	1	0	0	0	0	0	0	1	0	0	0	0	3	2	1	20
MER63D:hAT-Blackjack:DNA	0	0	0	0	-1	0	0	0	0	0	0	1	0	0	0	0	0	0	1	0	0	0	0	3	2	1	20
X20_LINE:CR1:LINE	0	0	0	0	0	0	0	0	0	0	0	1	0	0	0	0	0	0	1	0	0	0	0	2	2	0	21
LTR47B3:ERVL:LTR	0	0	0	0	0	0	0	0	0	0	0	1	0	0	0	-1	0	0	0	1	0	0	0	3	2	1	20
MER133B:DNA?:DNA?	0	0	0	0	0	0	0	0	0	0	0	0	0	0	0	0	0	0	1	1	0	0	0	2	2	0	21
UCON28b:Unknown:Unknown	0	0	0	0	0	1	0	0	0	0	0	0	0	0	0	0	0	0	1	-1	0	0	0	3	2	1	20
Eulor8:TcMar?:DNA	0	0	0	0	0	0	0	0	0	0	0	1	0	0	0	0	0	0	1	0	0	0	0	2	2	0	21
LTR3B:ERVK:LTR	0	0	0	0	-1	0	0	0	0	0	0	1	0	0	0	0	0	0	1	0	0	-1	0	4	2	2	19
LTR14C:ERVK:LTR	0	0	0	0	0	0	0	0	0	0	0	1	0	0	0	0	0	0	1	0	0	0	0	2	2	0	21
LTR42:ERVL:LTR	0	0	0	0	-1	0	0	0	0	0	0	1	0	0	0	0	0	0	1	0	0	0	0	3	2	1	20
HERV-Fc1-int:ERV1:LTR	-1	0	0	0	-1	-1	0	0	1	0	0	0	0	0	0	0	0	0	0	-1	1	0	0	6	2	4	17
HERV1_LTRd:ERV1:LTR	0	0	0	0	0	0	0	0	0	0	0	0	0	0	0	0	0	0	1	0	0	0	1	2	2	0	21
DNA1_Mam:TcMar:DNA	0	0	0	0	-1	1	0	0	0	0	0	1	0	0	0	0	0	0	0	-1	0	0	0	4	2	2	19
L1M:L1:LINE	0	0	0	0	-1	0	0	0	0	0	0	1	0	0	0	0	0	0	1	0	0	0	0	3	2	1	20
tRNA-Leu-TTG:tRNA:tRNA	0	0	0	0	0	0	0	0	0	1	0	0	1	0	0	0	0	0	0	0	0	0	0	2	2	0	21
MER92C:ERV1:LTR	0	0	0	0	-1	0	0	0	0	0	0	1	0	0	0	0	0	0	1	-1	0	0	0	4	2	2	19
MER97c:hAT-Tip100:DNA	0	0	0	0	-1	0	0	0	0	0	0	1	0	0	0	0	0	0	1	0	0	0	0	3	2	1	20
LTR81AB:Gypsy:LTR	0	0	0	0	-1	0	0	0	0	0	0	1	0	0	0	-1	0	0	1	0	0	0	0	4	2	2	19
U1:snRNA:snRNA	0	0	0	0	0	0	0	1	0	0	0	0	0	0	0	0	0	0	0	1	0	0	0	2	2	0	21
MamTip3B:hAT-Tip100:DNA	0	0	0	0	-1	0	0	0	0	0	-1	1	0	0	0	0	0	0	1	-1	0	0	0	5	2	3	18
Charlie13b:hAT-Charlie:DNA	0	0	0	0	-1	0	0	0	0	0	0	1	0	0	0	0	0	0	1	0	0	0	0	3	2	1	20
UCON5:Unknown:Unknown	0	0	0	0	0	0	0	0	0	0	0	1	0	0	0	0	0	0	1	0	0	0	0	2	2	0	21
EutTc1-N2:TcMar-Tc1:DNA	0	0	0	0	0	-1	0	0	0	0	0	1	0	0	0	0	0	0	1	0	0	0	0	3	2	1	20
LTR38A1:ERV1:LTR	0	0	0	0	0	0	0	0	0	0	0	1	0	0	0	0	0	0	1	0	0	0	0	2	2	0	21
MER70B:ERVL:LTR	0	0	0	0	0	0	0	0	0	0	0	1	0	0	0	0	0	0	1	0	0	0	0	2	2	0	21
MER73:ERVL:LTR	0	0	0	0	-1	0	0	0	0	0	0	1	0	0	0	0	0	0	1	0	0	0	0	3	2	1	20
LTR7C:ERV1:LTR	0	0	0	0	-1	0	0	0	0	0	0	1	0	0	0	0	0	0	1	0	0	0	0	3	2	1	20
MER70A:ERVL:LTR	0	0	0	0	0	0	0	0	0	0	0	1	0	0	0	0	0	0	1	0	0	0	0	2	2	0	21
Charlie7b_Mars:hAT-Charlie:DNA	1	0	0	0	0	0	0	0	0	0	0	0	0	0	0	0	0	0	0	1	0	0	0	2	2	0	21
Zaphod5a:hAT-Tip100:DNA	0	0	0	0	0	0	0	0	0	0	0	0	0	0	0	0	0	0	1	1	0	0	0	2	2	0	21
MER97a:hAT-Tip100:DNA	0	0	0	0	-1	0	0	0	0	0	0	1	0	0	0	0	0	0	1	0	0	0	0	3	2	1	20
Charlie2b:hAT-Charlie:DNA	0	0	0	0	-1	0	0	0	0	0	0	1	0	0	0	0	0	0	1	0	0	0	0	3	2	1	20
UCON86:L2:LINE	0	0	0	0	-1	0	0	0	0	0	0	1	0	0	0	0	0	0	1	-1	0	0	0	4	2	2	19
HERVL32-int:ERVL:LTR	0	0	0	0	0	0	0	0	0	0	0	1	0	0	0	0	0	0	1	-1	0	0	0	3	2	1	20
SAR:Satellite:Satellite	0	0	0	0	0	-1	0	0	0	0	-1	1	-1	0	0	0	0	0	1	0	0	0	0	5	2	3	18
CER:Satellite:Satellite	0	0	0	0	-1	0	0	0	0	0	0	1	0	0	0	0	0	0	1	0	0	0	0	3	2	1	20
(TCTC)n:Simple_repeat:Simple_repeat	0	0	0	0	0	0	0	0	0	0	0	0	1	0	0	0	0	0	0	0	0	0	0	1	1	0	22
UCON12:Unknown:Unknown	0	0	0	0	0	0	0	0	0	0	0	0	0	0	0	0	0	0	1	0	0	0	0	1	1	0	22
UCON22:Unknown:Unknown	0	0	0	0	0	1	0	0	0	0	0	0	0	0	0	0	0	0	0	0	0	0	0	1	1	0	22
GSATX:centr:Satellite	0	0	0	0	0	0	0	0	0	0	0	0	0	0	0	0	0	0	0	1	0	0	0	1	1	0	22
(GCC)n:Simple_repeat:Simple_repeat	0	0	0	0	0	0	0	0	0	0	0	0	1	0	0	0	0	0	0	0	0	0	0	1	1	0	22
A-rich:Low_complexity:Low_complexity	0	0	0	0	0	0	0	0	0	0	0	0	1	0	0	0	0	0	0	0	0	0	0	1	1	0	22
(TCCCCC)n:Simple_repeat:Simple_repeat	0	0	0	0	0	0	0	0	0	0	0	0	1	0	0	0	0	0	0	0	0	0	0	1	1	0	22
(TTCT)n:Simple_repeat:Simple_repeat	0	0	0	0	0	0	0	0	0	0	0	0	1	0	0	0	0	0	0	0	0	0	0	1	1	0	22
HY3:scRNA:scRNA	0	0	0	0	0	0	0	0	0	0	0	0	0	0	0	0	0	0	1	0	0	0	0	1	1	0	22
UCON71:Unknown:Unknown	0	0	0	0	0	0	0	0	0	0	0	0	0	0	0	0	0	0	0	1	0	0	0	1	1	0	22
(CCCG)n:Simple_repeat:Simple_repeat	0	0	0	0	0	0	0	0	0	0	0	0	1	0	0	0	0	0	0	0	0	0	0	1	1	0	22
SVA_F:SVA:Retroposon	0	0	0	0	-1	0	0	0	0	-1	0	1	0	0	0	0	0	0	0	0	0	0	0	3	1	2	20
UCON19:Unknown:Unknown	0	0	0	0	0	0	0	0	0	0	0	0	0	0	0	0	0	0	1	0	0	0	0	1	1	0	22
LTR108b_Mam:ERVL:LTR	-1	0	0	0	0	1	0	0	0	0	0	0	0	0	0	0	0	0	0	0	0	0	0	2	1	1	21
(CCTT)n:Simple_repeat:Simple_repeat	0	0	0	0	0	0	0	0	0	0	0	0	1	0	0	0	0	0	0	0	0	0	0	1	1	0	22
tRNA-Gly-GGG:tRNA:tRNA	0	0	0	0	0	0	0	0	0	0	0	0	1	0	0	0	0	0	0	-1	0	0	0	2	1	1	21
(TCCCC)n:Simple_repeat:Simple_repeat	0	0	0	0	0	0	0	0	0	0	0	0	1	0	0	0	0	0	0	0	0	0	0	1	1	0	22
EutTc1-N1:TcMar-Tc1:DNA	1	0	0	0	-1	-1	0	0	0	0	0	0	0	0	0	0	0	0	0	0	0	0	0	3	1	2	20
(GA)n:Simple_repeat:Simple_repeat	0	0	0	0	0	0	0	0	0	0	0	0	1	0	0	0	0	0	0	0	0	0	0	1	1	0	22
GA-rich:Low_complexity:Low_complexity	0	0	0	0	0	0	0	0	0	0	0	0	1	0	0	0	0	0	0	0	0	0	0	1	1	0	22
(CAG)n:Simple_repeat:Simple_repeat	0	0	0	0	0	0	0	0	0	0	0	0	1	0	0	0	0	0	0	0	0	0	0	1	1	0	22
(TCTT)n:Simple_repeat:Simple_repeat	0	0	0	0	0	0	0	0	0	0	0	0	1	0	0	0	0	0	0	0	0	0	0	1	1	0	22
UCON28c:Unknown:Unknown	0	0	0	0	0	0	0	0	0	0	0	0	0	0	0	0	0	0	1	-1	0	0	0	2	1	1	21
HERV1_LTRa:ERV1:LTR	0	0	0	0	-1	-1	0	0	0	0	0	0	0	0	0	0	0	0	1	0	0	0	0	3	1	2	20
(CGG)n:Simple_repeat:Simple_repeat	0	0	0	0	0	0	0	0	0	0	0	0	1	0	0	0	0	0	0	0	0	0	0	1	1	0	22
UCON20:Unknown:Unknown	0	0	0	0	-1	0	0	0	0	0	0	0	0	0	0	0	0	0	1	0	0	0	0	2	1	1	21
(T)n:Simple_repeat:Simple_repeat	0	0	0	0	0	0	0	0	0	0	0	0	1	0	0	0	0	0	0	0	0	0	0	1	1	0	22
MER121B:hAT?:DNA	0	0	0	0	0	0	0	0	0	0	0	0	0	0	0	0	0	0	1	0	0	0	0	1	1	0	22
(CATCT)n:Simple_repeat:Simple_repeat	0	0	0	0	0	0	0	0	0	0	0	0	1	0	0	0	0	0	0	0	0	0	0	1	1	0	22
(GGC)n:Simple_repeat:Simple_repeat	0	0	0	0	0	0	0	0	0	0	0	0	1	0	0	0	0	0	0	0	0	0	0	1	1	0	22
(CCCGT)n:Simple_repeat:Simple_repeat	0	0	0	0	0	0	0	0	0	0	0	0	1	0	0	0	0	0	0	0	0	0	0	1	1	0	22
(TTTCT)n:Simple_repeat:Simple_repeat	0	0	0	0	0	0	0	0	0	0	0	0	1	0	0	0	0	0	0	0	0	0	0	1	1	0	22
(GCA)n:Simple_repeat:Simple_repeat	0	0	0	0	0	0	0	0	0	0	0	0	1	0	0	0	0	0	0	0	0	0	0	1	1	0	22
HY5:scRNA:scRNA	0	0	0	0	0	0	0	0	0	0	0	0	1	0	0	0	0	0	0	0	0	0	0	1	1	0	22
(GGGGA)n:Simple_repeat:Simple_repeat	0	0	0	0	0	0	0	0	0	0	0	0	1	0	0	0	0	0	0	0	0	0	0	1	1	0	22
MER125:DNA:DNA	0	0	0	0	0	0	0	0	0	0	0	0	0	0	0	0	0	0	1	0	0	0	0	1	1	0	22
UCON11:TcMar-Tigger:DNA	0	0	0	0	0	0	0	0	0	0	0	0	0	0	0	0	0	0	1	0	0	0	0	1	1	0	22
LTR77:ERV1:LTR	0	0	0	0	0	0	0	0	0	0	0	1	0	0	0	0	0	0	0	0	0	0	0	1	1	0	22
(AG)n:Simple_repeat:Simple_repeat	0	0	0	0	0	0	0	0	0	0	0	0	1	0	0	0	0	0	0	0	0	0	0	1	1	0	22
UCON17:Unknown:Unknown	0	0	0	0	0	0	0	0	0	0	0	0	0	0	0	0	0	0	1	0	0	0	0	1	1	0	22
U3:snRNA:snRNA	0	-1	0	0	0	0	0	0	0	0	0	0	0	0	0	0	0	0	1	0	0	0	0	2	1	1	21
Zaphod5b:hAT-Tip100:DNA	0	0	0	0	0	0	0	0	0	0	0	1	0	0	0	0	0	0	0	0	0	0	0	1	1	0	22
(CTT)n:Simple_repeat:Simple_repeat	0	0	0	0	0	0	0	0	0	0	0	0	1	0	0	0	0	0	0	0	0	0	0	1	1	0	22
tRNA-Arg-AGA:tRNA:tRNA	0	0	0	0	0	0	0	0	0	0	0	0	1	0	0	0	0	0	0	0	0	0	0	1	1	0	22
EuthAT-N1a:hAT-Tip100:DNA	0	0	0	0	0	0	0	0	0	0	0	0	0	0	0	0	0	0	0	1	0	0	0	1	1	0	22
MER136:DNA:DNA	0	0	0	0	0	0	0	0	0	0	0	0	0	0	0	1	0	0	0	0	0	0	0	1	1	0	22
MER66A:ERV1:LTR	0	0	-1	0	-1	0	0	0	0	0	0	0	0	0	0	0	0	0	1	-1	0	0	0	4	1	3	19
(CTG)n:Simple_repeat:Simple_repeat	0	0	0	0	0	0	0	0	0	0	0	0	1	0	0	0	0	0	0	0	0	0	0	1	1	0	22
Eulor1:DNA:DNA	0	0	0	0	0	1	0	0	0	0	0	0	0	0	0	0	0	0	0	-1	0	0	0	2	1	1	21
PRIMAX-int:ERV1:LTR	0	0	0	0	0	0	0	0	0	0	0	1	0	0	0	0	0	0	0	0	0	0	0	1	1	0	22
(CGCGTG)n:Simple_repeat:Simple_repeat	0	0	0	0	0	0	0	0	0	0	0	0	1	0	0	0	0	0	0	0	0	0	0	1	1	0	22
(A)n:Simple_repeat:Simple_repeat	0	0	0	0	0	0	0	0	0	0	0	0	1	0	0	0	0	0	0	0	0	0	0	1	1	0	22
Eulor11:DNA:DNA	0	0	0	0	0	0	0	0	0	0	0	0	0	0	0	0	0	0	1	-1	0	0	0	2	1	1	21
Eulor10:DNA?:DNA?	0	0	0	0	-1	0	0	0	0	0	0	0	0	0	0	0	0	0	0	1	0	0	0	2	1	1	21
tRNA-Trp-TGG:tRNA:tRNA	0	0	0	0	0	0	0	0	0	0	0	0	1	0	0	0	0	0	0	0	0	0	0	1	1	0	22
(CGCC)n:Simple_repeat:Simple_repeat	0	0	0	0	0	0	0	0	0	0	0	0	1	0	0	0	0	0	0	0	0	0	0	1	1	0	22
(TTTTC)n:Simple_repeat:Simple_repeat	0	0	0	0	0	0	0	0	0	0	0	0	1	0	0	0	0	0	0	0	0	0	0	1	1	0	22
(CACCAC)n:Simple_repeat:Simple_repeat	0	0	0	0	0	0	0	0	0	0	0	0	1	0	0	0	0	0	0	0	0	0	0	1	1	0	22
U7:snRNA:snRNA	0	0	0	0	-1	0	0	0	0	0	0	0	0	0	0	0	0	0	0	1	0	0	0	2	1	1	21
UCON69:hAT?:DNA	0	0	0	0	0	0	0	0	0	0	0	0	0	0	0	0	0	0	1	0	0	0	0	1	1	0	22
MER50C:ERV1:LTR	0	0	0	0	-1	-1	0	0	0	0	0	1	0	0	0	0	0	0	0	0	0	0	0	3	1	2	20
(CGTC)n:Simple_repeat:Simple_repeat	0	0	0	0	0	0	0	0	0	0	0	0	1	0	0	0	0	0	0	0	0	0	0	1	1	0	22
CR1-3_Croc:CR1:LINE	0	0	0	0	0	0	0	0	0	0	0	0	0	0	0	0	0	0	1	0	0	0	0	1	1	0	22
UCON9:Unknown:Unknown	0	0	0	0	0	0	0	0	0	0	0	0	0	0	0	0	0	0	1	0	0	0	0	1	1	0	22
LSU-rRNA_Hsa:rRNA:rRNA	-1	0	0	0	0	-1	-1	0	0	0	-1	0	1	0	-1	0	0	0	0	0	0	0	0	6	1	5	17
(TTC)n:Simple_repeat:Simple_repeat	0	0	0	0	0	0	0	0	0	0	0	0	1	0	0	0	0	0	0	0	0	0	0	1	1	0	22
(AAAAG)n:Simple_repeat:Simple_repeat	0	0	0	0	0	0	0	0	0	0	0	0	1	0	0	0	0	0	0	0	0	0	0	1	1	0	22
LTR47B:ERVL:LTR	0	0	0	0	0	0	0	0	0	0	0	0	0	0	0	0	0	0	1	-1	0	0	0	2	1	1	21
(CCGCCG)n:Simple_repeat:Simple_repeat	0	0	0	0	0	0	0	0	0	0	0	0	1	0	0	0	0	0	0	0	0	0	0	1	1	0	22
(TGC)n:Simple_repeat:Simple_repeat	0	0	0	0	0	0	0	0	0	0	0	0	1	0	0	0	0	0	0	0	0	0	0	1	1	0	22
(CGTT)n:Simple_repeat:Simple_repeat	0	0	0	0	0	0	0	0	0	0	0	0	1	0	0	0	0	0	0	0	0	0	0	1	1	0	22
LTR60:ERV1:LTR	0	0	0	0	-1	0	1	0	0	0	0	0	0	0	0	0	0	0	0	0	0	0	0	2	1	1	21
MER134:DNA?:DNA?	0	0	0	0	0	0	0	0	0	0	0	0	0	0	0	0	0	0	1	0	0	0	0	1	1	0	22
LTR22B2:ERVK:LTR	0	0	0	0	-1	0	0	0	0	0	0	0	0	0	0	0	0	0	0	1	0	0	0	2	1	1	21
UCON59:DNA:DNA	0	0	0	0	0	0	0	0	0	0	0	0	0	0	0	0	0	0	1	0	0	0	0	1	1	0	22
HY4:scRNA:scRNA	0	0	0	0	0	0	0	0	0	0	0	1	0	0	0	0	0	0	0	0	0	0	0	1	1	0	22
UCON7:DNA?:DNA?	0	0	0	0	0	0	0	0	0	0	0	0	0	0	0	0	0	0	1	0	0	0	0	1	1	0	22
UCON87:Unknown:Unknown	0	0	0	0	0	1	0	0	0	0	0	0	0	0	0	0	0	0	0	0	0	0	0	1	1	0	22
(GCCG)n:Simple_repeat:Simple_repeat	0	0	0	0	0	0	0	0	0	0	0	0	1	0	0	0	0	0	0	0	0	0	0	1	1	0	22
(GAAA)n:Simple_repeat:Simple_repeat	0	0	0	0	0	0	0	0	0	0	0	0	1	0	0	0	0	0	0	0	0	0	0	1	1	0	22
UCON23:hAT-Tip100?:DNA	0	0	0	0	0	0	0	0	0	0	0	0	0	0	0	0	0	0	0	1	0	0	0	1	1	0	22
LTR108a_Mam:ERVL:LTR	0	0	0	0	-1	-1	0	0	0	0	0	0	0	0	0	0	0	0	0	1	0	0	0	3	1	2	20
(AGAA)n:Simple_repeat:Simple_repeat	0	0	0	0	0	0	0	0	0	0	0	0	1	0	0	0	0	0	0	0	0	0	0	1	1	0	22
MER75A:PiggyBac:DNA	0	0	0	0	0	0	0	0	0	0	0	0	0	0	0	0	0	0	1	0	0	0	0	1	1	0	22
Eulor6B:DNA?:DNA?	0	0	0	0	0	0	0	0	0	0	0	1	0	0	0	0	0	0	0	-1	0	0	0	2	1	1	21
(C)n:Simple_repeat:Simple_repeat	0	0	0	0	0	0	0	0	0	0	0	0	1	0	0	0	0	0	0	0	0	0	0	1	1	0	22
(AAAG)n:Simple_repeat:Simple_repeat	0	0	0	0	0	0	0	0	0	0	0	0	1	0	0	0	0	0	0	0	0	0	0	1	1	0	22
(CCT)n:Simple_repeat:Simple_repeat	0	0	0	0	0	0	0	0	0	0	0	0	1	0	0	0	0	0	0	0	0	0	0	1	1	0	22
LTR58:ERV1:LTR	0	0	0	0	0	0	0	0	0	0	0	1	0	0	0	0	0	0	0	0	0	0	0	1	1	0	22
(GAGA)n:Simple_repeat:Simple_repeat	0	0	0	0	0	0	0	0	0	0	0	0	1	0	0	0	0	0	0	0	0	0	0	1	1	0	22
(CCG)n:Simple_repeat:Simple_repeat	0	0	0	0	0	0	0	0	0	0	0	0	1	0	0	0	0	0	0	0	0	0	0	1	1	0	22
(TC)n:Simple_repeat:Simple_repeat	0	0	0	0	0	0	0	0	0	0	0	0	1	0	0	0	0	0	0	0	0	0	0	1	1	0	22
(CCGGCC)n:Simple_repeat:Simple_repeat	0	0	0	0	0	0	0	0	0	0	0	0	1	0	0	0	0	0	0	0	0	0	0	1	1	0	22
GSAT:centr:Satellite	0	0	0	0	0	0	0	0	0	0	0	1	0	0	0	0	0	0	0	0	0	0	0	1	1	0	22
X34_DNA:DNA:DNA	0	0	0	0	0	0	0	0	0	0	0	0	0	0	0	0	0	0	1	-1	0	0	0	2	1	1	21
LTR108c_Mam:ERVL:LTR	0	0	0	0	0	0	0	0	0	0	0	0	0	0	0	0	0	0	1	0	0	0	0	1	1	0	22
UCON97:DNA:DNA	0	0	0	0	0	0	0	0	0	0	0	0	0	0	0	0	0	0	0	1	0	0	0	1	1	0	22
UCON88:Unknown:Unknown	0	0	0	0	0	0	0	0	0	0	0	1	0	0	0	0	0	0	0	0	0	0	0	1	1	0	22
Eulor5B:DNA?:DNA?	0	0	0	0	0	0	0	0	0	0	0	0	0	0	0	0	0	0	0	1	0	0	0	1	1	0	22
G-rich:Low_complexity:Low_complexity	0	0	0	0	0	0	0	0	0	0	0	0	1	0	0	0	0	0	0	0	0	0	0	1	1	0	22
MER123:DNA?:DNA?	0	0	0	0	0	1	0	0	0	0	0	0	0	0	0	0	0	0	0	0	0	0	0	1	1	0	22
(TTTC)n:Simple_repeat:Simple_repeat	0	0	0	0	0	0	0	0	0	0	0	0	1	0	0	0	0	0	0	0	0	0	0	1	1	0	22
(CCCT)n:Simple_repeat:Simple_repeat	0	0	0	0	0	0	0	0	0	0	0	0	1	0	0	0	0	0	0	0	0	0	0	1	1	0	22
(AAGAA)n:Simple_repeat:Simple_repeat	0	0	0	0	0	0	0	0	0	0	0	0	1	0	0	0	0	0	0	0	0	0	0	1	1	0	22
UCON80_AMi:Unknown:Unknown	0	0	0	0	0	0	0	0	0	0	0	0	0	0	0	0	0	0	0	1	0	0	0	1	1	0	22
L1P:L1:LINE	0	0	0	0	-1	0	0	0	0	0	0	0	0	0	0	0	0	0	1	0	0	0	0	2	1	1	21
(CGT)n:Simple_repeat:Simple_repeat	0	0	0	0	0	0	0	0	0	0	0	0	1	0	0	0	0	0	0	0	0	0	0	1	1	0	22
(CGTGCGG)n:Simple_repeat:Simple_repeat	0	0	0	0	0	0	0	0	0	0	0	0	1	0	0	0	0	0	0	0	0	0	0	1	1	0	22
MLT1E1-int:ERVL-MaLR:LTR	0	0	0	0	0	0	0	0	0	0	0	0	0	0	0	0	0	0	1	0	0	0	0	1	1	0	22
MER68C:ERVL:LTR	0	0	0	0	-1	0	0	0	0	0	0	1	0	0	0	0	0	0	0	-1	0	0	0	3	1	2	20
(AAGA)n:Simple_repeat:Simple_repeat	0	0	0	0	0	0	0	0	0	0	0	0	1	0	0	0	0	0	0	0	0	0	0	1	1	0	22
D20S16:Satellite:Satellite	0	0	0	0	-1	0	0	0	0	0	0	0	0	0	0	0	0	0	0	0	0	0	1	2	1	1	21
U2:snRNA:snRNA	0	0	0	0	-1	0	0	0	0	0	0	1	0	0	0	0	0	0	0	0	0	0	0	2	1	1	21
(ATGAA)n:Simple_repeat:Simple_repeat	0	0	0	0	0	0	0	0	0	0	0	0	1	0	0	0	0	0	0	0	0	0	0	1	1	0	22
MER57E3:ERV1:LTR	0	0	0	0	-1	-1	0	0	0	0	0	0	0	0	0	0	1	0	0	0	0	0	0	3	1	2	20
(GCCGCG)n:Simple_repeat:Simple_repeat	0	0	0	0	0	0	0	0	0	0	0	0	1	0	0	0	0	0	0	0	0	0	0	1	1	0	22
(AT)n:Simple_repeat:Simple_repeat	0	0	0	0	0	0	0	0	0	0	0	0	1	0	0	0	0	0	0	0	0	0	0	1	1	0	22
(CTTT)n:Simple_repeat:Simple_repeat	0	0	0	0	0	0	0	0	0	0	0	0	1	0	0	0	0	0	0	0	0	0	0	1	1	0	22
UCON96:Unknown:Unknown	0	0	0	0	-1	0	0	0	0	0	0	0	0	0	0	0	0	0	0	1	0	0	0	2	1	1	21
(G)n:Simple_repeat:Simple_repeat	0	0	0	0	0	0	0	0	0	0	0	0	1	0	0	0	0	0	0	0	0	0	0	1	1	0	22
Eulor2B:DNA?:DNA?	0	0	0	0	-1	0	0	0	0	0	0	0	0	0	0	0	0	0	1	0	0	0	0	2	1	1	21
UCON57:Unknown:Unknown	0	0	0	0	0	1	0	0	0	0	0	0	0	0	0	0	0	0	0	0	0	0	0	1	1	0	22
MER30B:hAT-Charlie:DNA	0	0	0	0	-1	0	0	0	0	0	0	1	0	0	0	0	0	0	0	-1	0	0	0	3	1	2	20
LTR21C:ERV1:LTR	0	0	0	0	0	0	0	0	0	0	1	0	0	0	0	0	0	0	0	0	0	0	0	1	1	0	22
(CT)n:Simple_repeat:Simple_repeat	0	0	0	0	0	0	0	0	0	0	0	0	1	0	0	0	0	0	0	0	0	0	0	1	1	0	22
(CGC)n:Simple_repeat:Simple_repeat	0	0	0	0	0	0	0	0	0	0	0	0	1	0	0	0	0	0	0	0	0	0	0	1	1	0	22
Eulor2C:DNA?:DNA?	0	0	0	0	0	-1	0	0	0	0	0	0	0	0	0	0	0	0	0	0	0	0	0	1	0	1	22
HERV-Fc2-int:ERV1:LTR	0	0	0	0	0	-1	0	0	0	0	0	0	0	0	0	0	0	0	0	0	0	0	0	1	0	1	22
(TTGACAT)n:Simple_repeat:Simple_repeat	0	0	0	0	0	0	0	0	0	0	0	0	-1	0	0	0	0	0	0	0	0	0	0	1	0	1	22
LTR22C:ERVK:LTR	0	0	0	0	-1	0	0	0	0	0	0	0	0	0	0	0	0	0	0	0	0	0	0	1	0	1	22
UCON80:hAT?:DNA	-1	0	0	0	0	-1	0	0	0	0	0	0	0	0	0	0	0	0	0	0	0	0	0	2	0	2	21
UCON100:DNA?:DNA?	0	0	0	0	0	0	0	0	0	0	0	0	0	0	0	0	0	0	0	-1	0	0	0	1	0	1	22
UCON84:Unknown:Unknown	0	0	0	0	0	0	0	0	0	0	0	0	0	0	0	0	0	0	0	-1	0	0	0	1	0	1	22
UCON9B:Unknown:Unknown	0	0	0	0	-1	0	0	0	0	0	0	0	0	0	0	0	0	0	0	0	0	0	0	1	0	1	22
HERV-Fc1_LTR1:ERV1:LTR	0	0	0	0	-1	0	0	0	0	0	0	0	0	0	0	0	0	0	0	0	0	0	0	1	0	1	22
(TCTTC)n:Simple_repeat:Simple_repeat	0	0	0	0	0	0	0	0	0	0	0	0	-1	0	0	0	0	0	0	0	0	0	0	1	0	1	22
UCON94:Unknown:Unknown	0	0	0	0	0	0	0	0	0	0	0	0	0	0	0	0	0	0	0	-1	0	0	0	1	0	1	22
