# Supplementary material for: Virus-induced transposable element expression up-regulation in human and mouse host cells
Source: Life Sci Alliance. 2020 Jan 21;3(2):e201900536. doi: 10.26508/lsa.201900536 (PMC6977392; doi:10.26508/lsa.201900536)
Supplement: Supplementary file 5 [file LSA-2019-00536_TableS5.xlsx]

## Sheet: mm10.TEtrans.repeats.FDR0.05
# TEtranscripts repeat subfamily results for mouse virus data sets
# mm10; TEtranscripts; repeat subfamily quantification; FDR < 0.05
	H5N1	H5N8	HSV-1_DRG	HSV-1_LIM	IAVaecii	IAVam	IAVcc	IAVcd103	IBV	LCMV	MCMV	MCV	MHV68	WNV_12hpi	WNV	totDE	DEup	DEdown	notDE
LTRIS2:ERV1:LTR	1	1	0	1	1	1	1	1	-1	1	1	0	0	1	1	12	11	1	3		1	upregulated during infection (FDR < 0.05)
LTRIS3:ERV1:LTR	1	1	0	1	1	1	1	1	-1	1	1	0	0	1	1	12	11	1	3		0	no change due to infection
RLTR10:ERVK:LTR	1	1	0	1	0	1	0	0	1	1	1	0	0	1	1	9	9	0	6		-1	downregulated during infection (FDR < 0.05)
L1MdA_VI:L1:LINE	1	0	0	1	1	1	0	0	1	1	1	0	0	1	1	9	9	0	6
MMERGLN-int:ERV1:LTR	1	1	0	1	1	0	1	0	1	1	1	0	0	0	1	9	9	0	6
L1MdF_IV:L1:LINE	1	0	0	1	1	1	0	0	1	1	1	0	0	1	1	9	9	0	6
ERVB2_1-I_MM:ERVK:LTR	1	1	0	1	0	1	0	1	0	1	1	0	0	1	1	9	9	0	6
RLTR6-int:ERV1:LTR	1	0	0	1	1	1	1	0	1	1	1	0	0	0	1	9	9	0	6
RMER17A2:ERVK:LTR	1	1	0	1	1	1	0	0	1	0	1	0	0	1	1	9	9	0	6
RLTR13D3:ERVK:LTR	1	1	1	1	0	1	1	0	0	1	0	0	0	1	1	9	9	0	6
RLTR10-int:ERVK:LTR	1	1	0	1	0	1	0	0	1	1	1	0	0	1	1	9	9	0	6
LTR67B:ERVL:LTR	1	1	0	1	0	1	0	1	-1	1	1	0	0	1	1	10	9	1	5
RLTR46B:ERVK:LTR	1	1	0	1	1	1	0	0	0	1	0	1	0	1	1	9	9	0	6
Lx8:L1:LINE	1	0	0	1	1	1	0	0	1	0	1	0	0	1	1	8	8	0	7
RMER19B:ERVK:LTR	1	0	0	1	1	1	0	1	-1	0	1	0	0	1	1	9	8	1	6
L1MdFanc_I:L1:LINE	1	0	0	1	1	1	0	0	-1	1	1	0	0	1	1	9	8	1	6
L1MC3:L1:LINE	1	0	0	1	1	1	0	0	1	0	1	0	0	1	1	8	8	0	7
RLTR6_Mm:ERV1:LTR	1	0	0	1	1	1	1	0	1	1	-1	0	0	0	1	9	8	1	6
RLTR13D2:ERVK:LTR	1	0	0	1	1	1	0	1	0	1	0	0	0	1	1	8	8	0	7
MLT2F:ERVL:LTR	1	0	0	1	1	1	0	0	1	1	1	0	0	0	1	8	8	0	7
L1Lx_IV:L1:LINE	1	0	0	1	1	1	0	0	-1	1	1	0	0	1	1	9	8	1	6
Lx2:L1:LINE	0	0	0	1	1	1	0	0	1	1	1	0	0	1	1	8	8	0	7
ERVB5_1-I_MM:ERVK:LTR	1	1	0	1	1	1	0	0	-1	1	0	0	0	1	1	9	8	1	6
L1MdA_IV:L1:LINE	1	0	0	1	1	1	0	0	1	0	1	0	0	1	1	8	8	0	7
L1MdF_III:L1:LINE	1	0	0	1	1	1	0	0	0	1	1	0	0	1	1	8	8	0	7
L1MdA_III:L1:LINE	1	0	0	1	1	1	0	0	1	0	1	0	0	1	1	8	8	0	7
MMVL30-int:ERV1:LTR	1	0	0	1	1	1	1	0	1	1	-1	0	0	0	1	9	8	1	6
MMERGLN_LTR:ERV1:LTR	1	1	0	1	1	1	0	0	1	1	0	0	0	0	1	8	8	0	7
L1Lx_III:L1:LINE	0	0	0	1	1	1	0	0	1	1	1	0	0	1	1	8	8	0	7
MMERVK9C_I-int:ERVK:LTR	1	0	0	1	1	1	0	0	0	1	1	0	0	1	1	8	8	0	7
RLTR30D_RN:ERV1:LTR	1	1	0	1	1	1	1	0	1	0	0	0	0	0	1	8	8	0	7
LTRIS_Mm:ERV1:LTR	1	1	0	1	1	1	0	0	-1	0	1	1	0	0	1	9	8	1	6
RMER17C2:ERVK:LTR	1	0	0	1	0	1	0	0	1	0	1	0	0	1	1	7	7	0	8
MuLV-int:ERV1:LTR	1	0	0	1	1	1	0	0	1	0	1	0	0	0	1	7	7	0	8
RLTR6B_Mm:ERV1:LTR	1	0	0	1	1	0	0	0	1	1	1	0	0	0	1	7	7	0	8
MuRRS-int:ERV1:LTR	1	0	0	1	1	1	0	0	-1	0	1	0	0	1	1	8	7	1	7
L1MdGf_II:L1:LINE	1	0	0	1	0	1	0	0	1	0	1	0	0	1	1	7	7	0	8
Lx:L1:LINE	1	0	0	1	1	1	0	0	-1	1	0	0	0	1	1	8	7	1	7
IAPEY_LTR:ERVK:LTR	1	0	0	1	1	1	0	0	0	1	0	1	0	0	1	7	7	0	8
RLTR31_Mur:ERVK:LTR	1	0	0	1	0	1	0	0	0	0	1	1	0	1	1	7	7	0	8
L1MdF_I:L1:LINE	1	0	0	1	1	1	0	0	0	0	1	0	0	1	1	7	7	0	8
L1MdN_I:L1:LINE	1	0	0	1	1	1	0	0	0	0	1	0	0	1	1	7	7	0	8
L1MdA_VII:L1:LINE	1	0	0	1	1	1	0	0	0	0	1	0	0	1	1	7	7	0	8
L1ME4b:L1:LINE	1	0	0	1	0	1	0	0	1	0	1	0	0	1	1	7	7	0	8
L1M2c:L1:LINE	1	0	0	1	1	1	0	0	1	0	0	0	0	1	1	7	7	0	8
L1MdA_V:L1:LINE	1	0	0	1	1	1	0	0	-1	0	1	0	0	1	1	8	7	1	7
LTR72_RN:ERV1:LTR	1	1	0	1	0	1	0	0	0	1	1	0	0	0	1	7	7	0	8
MTD-int:ERVL-MaLR:LTR	1	1	0	1	0	1	0	0	0	0	1	0	0	1	1	7	7	0	8
IAPEy-int:ERVK:LTR	0	0	0	1	0	1	1	0	-1	1	1	0	0	1	1	8	7	1	7
MTB_Mm:ERVL-MaLR:LTR	1	0	0	1	1	1	0	0	-1	0	1	0	0	1	1	8	7	1	7
RLTR33:ERVK:LTR	1	0	0	1	1	1	0	0	-1	1	0	0	0	1	1	8	7	1	7
RMER10A:ERVL:LTR	1	0	0	1	1	1	0	0	1	0	0	0	0	1	1	7	7	0	8
RMER12B:ERVK:LTR	1	1	0	1	0	1	0	0	1	0	-1	0	0	1	1	8	7	1	7
IAP1-MM_I-int:ERVK:LTR	1	1	0	1	0	1	0	0	1	1	0	0	0	0	1	7	7	0	8
MTD:ERVL-MaLR:LTR	1	0	0	1	1	1	0	0	0	0	1	0	0	1	1	7	7	0	8
L1MdTf_III:L1:LINE	1	0	0	1	1	1	0	0	-1	0	1	0	0	1	1	8	7	1	7
B2_Mm2:B2:SINE	0	0	0	1	1	1	0	0	1	0	1	0	0	1	0	6	6	0	9
MTC:ERVL-MaLR:LTR	0	0	0	1	1	1	0	0	-1	0	1	0	0	1	1	7	6	1	8
L1MdGf_I:L1:LINE	0	0	0	1	0	1	0	0	1	0	1	0	0	1	1	6	6	0	9
RLTR1B:ERV1:LTR	1	0	0	1	1	1	0	0	-1	1	1	0	0	0	0	7	6	1	8
L1MdA_II:L1:LINE	0	0	0	1	1	1	0	0	0	0	1	0	0	1	1	6	6	0	9
Lx2B2:L1:LINE	1	0	0	1	0	1	0	0	-1	0	1	0	0	1	1	7	6	1	8
ORR1C2:ERVL-MaLR:LTR	1	0	0	1	0	1	0	0	1	0	0	0	0	1	1	6	6	0	9
MIR:MIR:SINE	0	0	0	1	1	1	0	0	1	0	1	0	0	1	0	6	6	0	9
L1MdMus_II:L1:LINE	0	0	0	1	1	1	0	0	-1	0	1	0	0	1	1	7	6	1	8
MLT2D:ERVL:LTR	1	0	0	1	0	1	0	0	-1	0	1	0	0	1	1	7	6	1	8
L1_Mur2:L1:LINE	1	0	0	1	0	1	0	0	0	1	1	0	0	0	1	6	6	0	9
MLT1D:ERVL-MaLR:LTR	1	0	0	1	1	1	0	0	-1	0	0	0	0	1	1	7	6	1	8
L1MEi:L1:LINE	1	0	0	1	0	1	0	0	1	0	0	0	0	1	1	6	6	0	9
ORR1B2:ERVL-MaLR:LTR	0	0	0	1	0	1	0	0	1	0	1	0	0	1	1	6	6	0	9
RMER12:ERVK:LTR	1	0	0	1	0	1	0	0	1	0	0	0	0	1	1	6	6	0	9
RMER5:ERV1:LTR	0	0	0	1	1	1	0	0	-1	0	1	0	0	1	1	7	6	1	8
L1MdV_II:L1:LINE	0	0	0	1	0	1	0	0	1	0	1	0	0	1	1	6	6	0	9
IAPEY5_I-int:ERVK:LTR	1	0	0	1	0	1	0	0	0	1	1	0	0	1	0	6	6	0	9
MTB:ERVL-MaLR:LTR	0	0	0	1	1	1	0	0	-1	0	1	0	0	1	1	7	6	1	8
L1MdV_I:L1:LINE	0	0	0	1	0	1	0	0	-1	0	1	0	1	1	1	7	6	1	8
L1M2a:L1:LINE	1	0	0	1	0	1	0	0	0	-1	1	0	0	1	1	7	6	1	8
ORR1C1:ERVL-MaLR:LTR	1	0	0	1	0	1	0	0	0	0	1	0	0	1	1	6	6	0	9
RLTR11A:ERVK:LTR	1	0	0	1	1	1	0	0	1	0	0	0	0	1	0	6	6	0	9
Lx9:L1:LINE	0	0	0	1	0	1	0	0	1	0	1	0	0	1	1	6	6	0	9
B1_Mur1:Alu:SINE	0	0	0	1	1	1	0	0	1	0	1	0	0	1	0	6	6	0	9
MLTR14:ERV1:LTR	0	0	0	1	0	1	0	0	1	0	1	0	0	1	1	6	6	0	9
B1_Mur2:Alu:SINE	0	0	0	1	1	1	0	0	1	0	1	0	0	1	0	6	6	0	9
RMER6A:ERVK:LTR	0	0	0	1	1	1	0	0	-1	0	1	0	0	1	1	7	6	1	8
MMERVK10D3_I-int:ERVK:LTR	1	0	0	1	1	1	0	0	-1	0	0	0	0	1	1	7	6	1	8
L1MdF_II:L1:LINE	1	0	0	1	1	1	0	0	-1	0	0	0	0	1	1	7	6	1	8
ORR1A3-int:ERVL-MaLR:LTR	1	0	0	1	0	1	0	0	-1	-1	1	0	0	1	1	8	6	2	7
RLTR25B:ERVK:LTR	1	0	0	1	0	1	0	0	-1	0	1	0	0	1	1	7	6	1	8
RLTR23:ERV1:LTR	1	0	0	1	1	1	0	0	-1	0	0	0	0	1	1	7	6	1	8
PB1D10:Alu:SINE	0	0	0	1	1	1	0	0	1	0	1	0	0	1	0	6	6	0	9
Lx3_Mus:L1:LINE	1	0	0	1	0	1	0	0	0	0	1	0	0	1	1	6	6	0	9
MMERVK10C-int:ERVK:LTR	-1	0	0	1	0	1	0	0	-1	0	1	0	1	1	1	8	6	2	7
L1MdTf_II:L1:LINE	1	0	0	1	0	1	0	0	1	0	1	0	0	0	1	6	6	0	9
L1_Rod:L1:LINE	0	0	0	1	1	1	0	0	0	0	1	0	0	1	1	6	6	0	9
L1MdV_III:L1:LINE	0	0	0	1	0	1	0	0	1	0	1	0	0	1	1	6	6	0	9
ETnERV2-int:ERVK:LTR	1	0	0	1	1	1	0	0	0	0	1	0	0	0	1	6	6	0	9
MER73:ERVL:LTR	1	1	0	1	1	0	1	0	0	0	0	0	0	0	1	6	6	0	9
Lx7:L1:LINE	0	0	0	1	0	1	0	0	1	0	1	0	0	1	1	6	6	0	9
L1MdF_V:L1:LINE	0	0	0	1	1	1	0	0	-1	0	1	0	0	1	1	7	6	1	8
L1M2:L1:LINE	0	0	0	1	1	1	0	0	1	0	1	0	0	1	0	6	6	0	9
LTR10_RN:ERVK:LTR	1	1	0	1	0	1	0	0	0	0	0	0	0	1	1	6	6	0	9
L1M3de:L1:LINE	1	0	0	1	1	0	0	0	-1	1	0	0	0	1	1	7	6	1	8
SYNREP_MM:Satellite:Satellite	0	0	0	0	0	1	0	0	1	1	0	1	1	0	0	5	5	0	10
ORR1A2:ERVL-MaLR:LTR	0	0	0	1	1	1	0	0	-1	0	1	0	0	1	0	6	5	1	9
RLTR48A:ERV1:LTR	1	0	0	1	1	1	0	0	0	0	1	0	0	0	0	5	5	0	10
L1MD3:L1:LINE	0	0	0	1	0	1	0	0	-1	0	1	0	0	1	1	6	5	1	9
Lx3C:L1:LINE	0	0	0	0	1	1	0	0	1	1	1	0	0	0	0	5	5	0	10
ORR1A2-int:ERVL-MaLR:LTR	0	0	0	1	1	1	0	0	-1	0	0	0	0	1	1	6	5	1	9
RMER2:ERV1:LTR	1	0	0	1	1	1	0	0	-1	0	1	0	0	0	0	6	5	1	9
PB1D9:Alu:SINE	0	0	0	1	1	1	0	0	1	0	1	0	0	0	0	5	5	0	10
ORR1B2-int:ERVL-MaLR:LTR	1	0	0	1	0	1	0	0	1	0	0	0	0	0	1	5	5	0	10
RMER30:hAT-Charlie:DNA	0	0	0	1	0	1	0	0	1	0	1	0	0	0	1	5	5	0	10
RLTR45:ERVK:LTR	1	0	0	1	1	1	0	0	-1	0	0	0	1	0	0	6	5	1	9
RLTR13A1:ERVK:LTR	0	0	0	1	0	1	1	0	0	0	0	0	0	1	1	5	5	0	10
ORR1A1-int:ERVL-MaLR:LTR	0	0	0	1	0	1	0	0	1	0	0	0	0	1	1	5	5	0	10
RLTR12BD_Mm:ERVK:LTR	1	0	0	1	0	1	0	0	-1	0	0	0	0	1	1	6	5	1	9
ORR1G:ERVL-MaLR:LTR	0	0	0	1	0	1	0	0	1	0	0	0	0	1	1	5	5	0	10
IAPLTR4:ERVK:LTR	1	0	0	1	1	0	0	0	0	0	-1	0	0	1	1	6	5	1	9
MER5A:hAT-Charlie:DNA	1	0	0	1	0	1	0	0	-1	0	1	0	0	0	1	6	5	1	9
L1MEd:L1:LINE	1	0	0	1	0	1	0	0	-1	0	1	0	0	1	0	6	5	1	9
RSINE1:B4:SINE	0	0	0	0	1	1	0	0	1	0	1	0	0	1	0	5	5	0	10
RMER15-int:ERVL:LTR	1	0	0	1	1	1	0	0	-1	0	0	0	0	0	1	6	5	1	9
GSAT_MM:Satellite:Satellite	1	0	0	0	0	0	0	0	1	1	0	1	1	0	0	5	5	0	10
B2_Mm1a:B2:SINE	1	0	0	1	1	1	0	0	-1	0	0	0	0	1	0	6	5	1	9
LTR16A2:ERVL:LTR	1	0	0	1	1	1	0	0	1	0	0	0	0	0	0	5	5	0	10
L1Lx_II:L1:LINE	0	0	0	1	0	1	0	0	1	0	0	0	0	1	1	5	5	0	10
MuRRS4-int:ERV1:LTR	1	0	0	1	1	1	0	0	-1	0	0	0	1	0	0	6	5	1	9
MTEa:ERVL-MaLR:LTR	0	0	0	1	0	1	0	0	-1	0	1	0	0	1	1	6	5	1	9
Lx5:L1:LINE	0	0	0	1	1	1	0	0	1	0	0	0	0	1	0	5	5	0	10
PB1:Alu:SINE	0	0	0	1	1	1	0	0	1	0	1	0	0	0	0	5	5	0	10
Lx8b:L1:LINE	0	0	0	1	1	1	0	0	1	0	1	0	0	0	0	5	5	0	10
RLTR24B_MM:ERV1:LTR	1	0	0	1	1	1	0	0	0	0	1	0	0	0	0	5	5	0	10
RMER17C:ERVK:LTR	1	0	0	1	1	1	0	0	-1	0	0	0	0	0	1	6	5	1	9
ORR1A1:ERVL-MaLR:LTR	0	0	0	1	1	1	0	0	-1	0	0	0	0	1	1	6	5	1	9
IAP1-MM_LTR:ERVK:LTR	1	0	0	1	0	0	0	0	1	1	0	1	0	0	0	5	5	0	10
ORR1D2:ERVL-MaLR:LTR	0	0	0	1	1	1	0	0	-1	0	1	0	0	1	0	6	5	1	9
BGLII_B:ERVK:LTR	1	0	0	1	0	1	0	0	0	0	0	0	0	1	1	5	5	0	10
MT-int:ERVL-MaLR:LTR	1	0	0	1	1	0	0	0	1	0	0	0	0	0	1	5	5	0	10
MER46C:TcMar-Tigger:DNA	1	0	0	1	0	1	0	0	0	0	1	0	0	1	0	5	5	0	10
RMER1B:Other:Other	0	0	0	1	1	1	0	0	0	0	1	0	0	1	0	5	5	0	10
MER31A:ERV1:LTR	0	0	0	1	0	1	0	0	1	0	1	1	0	0	0	5	5	0	10
L1MdTf_I:L1:LINE	1	0	0	1	0	1	0	0	1	0	0	0	0	0	1	5	5	0	10
ERVB7_2B-LTR_MM:ERVK:LTR	1	0	0	1	0	0	0	0	-1	1	0	0	0	1	1	6	5	1	9
RLTR9A3:ERVK:LTR	1	1	0	1	0	0	0	0	-1	0	0	0	0	1	1	6	5	1	9
MTE2a:ERVL-MaLR:LTR	0	0	0	1	0	1	0	0	0	0	1	0	0	1	1	5	5	0	10
RLTR4_Mm:ERV1:LTR	1	0	0	1	1	1	0	0	0	0	1	0	0	0	0	5	5	0	10
4.5SRNA:scRNA:scRNA	0	0	0	1	1	1	1	0	-1	0	1	0	0	0	0	6	5	1	9
RLTR13F:ERVK:LTR	1	0	0	1	0	1	0	0	0	0	0	0	0	1	1	5	5	0	10
MIR1_Amn:MIR:SINE	0	0	0	1	1	1	0	0	-1	0	1	0	0	1	0	6	5	1	9
RLTR14:ERV1:LTR	1	0	0	1	1	1	0	0	-1	0	1	0	0	0	0	6	5	1	9
BGLII:ERVK:LTR	0	0	0	1	0	1	0	0	0	1	0	0	0	1	1	5	5	0	10
MTEb:ERVL-MaLR:LTR	0	0	0	1	0	1	0	0	-1	0	1	0	0	1	1	6	5	1	9
Lx4A:L1:LINE	1	0	0	1	1	1	0	0	-1	0	0	0	0	1	0	6	5	1	9
MLT1E:ERVL-MaLR:LTR	1	0	0	1	1	0	0	0	1	0	0	0	0	0	1	5	5	0	10
MLT2B2:ERVL:LTR	1	0	0	1	0	1	0	0	-1	0	-1	0	0	1	1	7	5	2	8
RLTR1C:ERV1:LTR	1	0	0	0	1	1	0	0	0	0	0	0	0	1	1	5	5	0	10
RLTR10B:ERVK:LTR	1	0	0	0	1	1	0	0	1	0	0	1	0	-1	0	6	5	1	9
L1MdA_I:L1:LINE	0	0	0	1	0	1	0	0	0	0	1	0	0	1	1	5	5	0	10
MLTR18D_MM:ERVK:LTR	1	0	0	1	0	1	0	0	-1	1	0	0	0	1	0	6	5	1	9
ORR1F:ERVL-MaLR:LTR	0	0	0	1	1	1	0	0	-1	0	1	0	0	1	0	6	5	1	9
B3:B2:SINE	0	0	0	1	1	1	0	0	1	0	1	0	0	0	0	5	5	0	10
RMER17C-int:ERVK:LTR	1	0	0	1	1	1	0	0	-1	0	1	0	0	0	0	6	5	1	9
MTB-int:ERVL-MaLR:LTR	1	0	0	1	1	1	0	0	0	0	-1	0	0	0	1	6	5	1	9
B2_Mm1t:B2:SINE	0	0	0	1	1	1	0	0	0	0	1	0	0	1	0	5	5	0	10
RMER17D:ERVK:LTR	1	1	0	1	0	0	0	0	1	0	0	0	0	0	1	5	5	0	10
RodERV21-int:ERV1:LTR	1	0	0	1	0	1	0	0	0	0	1	0	0	1	0	5	5	0	10
RLTR28:ERVL:LTR	0	0	0	1	1	1	0	0	1	0	1	0	0	0	0	5	5	0	10
RMER3D-int:ERVK:LTR	-1	0	0	1	0	1	0	0	-1	0	1	0	0	1	1	7	5	2	8
RLTR4_MM-int:ERV1:LTR	1	0	0	1	1	1	0	0	-1	0	1	0	0	0	0	6	5	1	9
RLTRETN_Mm:ERVK:LTR	0	0	0	1	1	1	0	0	1	0	0	0	0	0	1	5	5	0	10
B1_Mur4:Alu:SINE	0	0	0	1	1	1	0	0	1	0	1	0	0	0	0	5	5	0	10
L1MdFanc_II:L1:LINE	1	0	0	1	0	1	0	0	-1	0	0	0	0	1	1	6	5	1	9
ERVB7_1-LTR_MM:ERVK:LTR	-1	0	0	1	1	1	0	0	-1	0	0	0	0	1	1	7	5	2	8
RLTR11A2:ERVK:LTR	1	0	0	1	0	1	0	0	-1	0	1	0	0	0	0	5	4	1	10
L1MC4a:L1:LINE	0	0	0	1	0	1	0	0	0	0	1	0	0	1	0	4	4	0	11
PB1D11:Alu:SINE	0	0	0	0	1	1	0	0	1	0	1	0	0	0	0	4	4	0	11
N.A_1	0	0	0	0	1	1	1	1	0	0	0	0	0	0	0	4	4	0	11
MIRc:MIR:SINE	0	0	0	0	0	1	0	0	-1	0	1	0	0	1	1	5	4	1	10
RLTR31C_MM:ERVK:LTR	0	0	0	0	1	1	0	0	-1	0	1	0	0	0	1	5	4	1	10
L1MA9:L1:LINE	1	0	0	1	0	1	0	0	0	0	1	0	0	0	0	4	4	0	11
RMER10B:ERVL:LTR	0	0	0	1	1	1	0	0	0	0	1	0	0	0	0	4	4	0	11
RLTR13D1:ERVK:LTR	1	1	0	0	0	0	0	0	0	0	0	0	0	1	1	4	4	0	11
Tigger5b_Glire:TcMar-Tigger:DNA	0	0	0	1	1	1	0	0	-1	0	1	0	0	0	0	5	4	1	10
PB2_1	0	0	0	0	1	1	1	1	0	0	0	0	0	0	0	4	4	0	11
MER33:hAT-Charlie:DNA	0	0	0	1	0	1	0	0	1	0	1	0	0	0	0	4	4	0	11
MLT1J:ERVL-MaLR:LTR	0	0	0	1	0	1	0	0	0	0	1	0	0	0	1	4	4	0	11
B1_Mus1:Alu:SINE	0	0	0	1	0	1	0	0	1	0	1	0	0	0	0	4	4	0	11
L1VL1:L1:LINE	1	0	0	0	0	1	0	0	1	0	0	0	0	0	1	4	4	0	11
RLTR1B-int:ERV1:LTR	0	0	0	0	1	1	0	0	-1	0	1	0	0	0	1	5	4	1	10
L1MB3:L1:LINE	0	0	0	1	0	1	0	0	0	0	1	0	0	0	1	4	4	0	11
MLT1I:ERVL-MaLR:LTR	0	0	0	1	0	1	0	0	1	0	1	0	0	0	0	4	4	0	11
RLTR6C_Mm:ERV1:LTR	1	0	0	1	0	0	0	0	0	1	-1	0	1	0	0	5	4	1	10
ORR1E:ERVL-MaLR:LTR	0	0	0	1	0	1	0	0	-1	0	1	0	0	1	0	5	4	1	10
L1MdMus_I:L1:LINE	0	0	0	0	0	1	0	0	0	0	1	0	0	1	1	4	4	0	11
M2_1	0	0	0	0	1	1	1	1	0	0	0	0	0	0	0	4	4	0	11
RMER15:ERVL:LTR	0	0	0	1	1	1	0	0	-1	0	1	0	0	0	0	5	4	1	10
B1_Mus2:Alu:SINE	0	0	0	1	0	1	0	0	1	0	1	0	0	0	0	4	4	0	11
MLTR73:ERV1:LTR	0	0	0	1	0	1	0	0	0	0	1	0	0	0	1	4	4	0	11
ERVL-E-int:ERVL:LTR	1	0	0	0	0	1	0	0	-1	0	1	0	0	0	1	5	4	1	10
PB1_1	0	0	0	0	1	1	1	1	0	0	0	0	0	0	0	4	4	0	11
LSU-rRNA_Hsa:rRNA:rRNA	1	1	0	0	0	1	0	0	1	0	0	0	0	0	0	4	4	0	11
ZP3AR:Satellite:Satellite	0	0	0	0	1	1	0	0	0	0	1	0	0	1	0	4	4	0	11
MLT1F2:ERVL-MaLR:LTR	1	0	0	1	0	0	0	0	-1	0	0	0	0	1	1	5	4	1	10
MURVY-LTR:ERV1:LTR	0	0	0	1	1	1	0	0	0	0	1	0	0	0	0	4	4	0	11
ORR1D2-int:ERVL-MaLR:LTR	1	0	0	1	0	1	0	0	0	0	0	0	0	1	0	4	4	0	11
MLT1E1A:ERVL-MaLR:LTR	1	0	0	1	0	0	0	0	0	0	0	0	0	1	1	4	4	0	11
M1_1	0	0	0	0	1	1	1	1	0	0	0	0	0	0	0	4	4	0	11
L1Lx_I:L1:LINE	0	0	0	0	0	1	0	0	0	0	1	0	0	1	1	4	4	0	11
RMER20C_Mm:ERVK:LTR	1	0	0	1	0	0	0	0	-1	0	0	0	0	1	1	5	4	1	10
L1_Mur3:L1:LINE	1	0	0	1	0	1	0	0	-1	0	1	0	0	0	0	5	4	1	10
HA_1	0	0	0	0	1	1	1	1	0	0	0	0	0	0	0	4	4	0	11
RLTR44C:ERVK:LTR	1	0	0	1	0	0	0	0	-1	0	0	0	0	1	1	5	4	1	10
B4A:B4:SINE	0	0	0	1	0	1	0	0	-1	0	1	0	0	1	0	5	4	1	10
L1M5:L1:LINE	0	0	0	1	0	1	0	0	-1	0	1	0	0	1	0	5	4	1	10
NS1_1	0	0	0	0	1	1	1	1	0	0	0	0	0	0	0	4	4	0	11
B3A:B2:SINE	0	0	0	1	1	1	0	0	0	0	1	0	0	0	0	4	4	0	11
RLTR3_Mm:ERVK:LTR	1	0	0	1	0	0	0	0	0	0	-1	0	0	1	1	5	4	1	10
B1_Mm:Alu:SINE	0	0	0	1	0	1	0	0	1	0	1	0	0	0	0	4	4	0	11
RLTR20A2B_MM:ERVK:LTR	1	0	0	1	0	0	0	0	0	0	0	0	0	1	1	4	4	0	11
RLTR13B4:ERVK:LTR	0	0	0	0	1	1	0	0	0	1	0	0	1	0	0	4	4	0	11
ERVB4_1B-LTR_MM:ERVK:LTR	0	0	0	1	0	0	0	0	-1	1	0	1	0	1	0	5	4	1	10
LTRIS4A:ERV1:LTR	0	0	0	1	0	1	0	0	0	0	0	1	0	0	1	4	4	0	11
ERVB3_1-I_MM:ERVK:LTR	-1	0	0	0	0	0	0	0	1	0	1	1	1	0	0	5	4	1	10
HA.var_1	0	0	0	0	1	1	1	1	0	0	0	0	0	0	0	4	4	0	11
MERVL_2A-int:ERVL:LTR	0	0	0	1	0	1	0	0	0	0	1	0	0	0	1	4	4	0	11
MT2B1:ERVL:LTR	0	0	0	1	0	1	0	0	1	0	1	0	0	0	0	4	4	0	11
Lx6:L1:LINE	0	0	0	1	0	1	0	0	1	0	1	0	0	0	0	4	4	0	11
ORR1A4:ERVL-MaLR:LTR	0	0	0	1	1	1	0	0	-1	0	1	0	0	0	0	5	4	1	10
RLTR9B2:ERVK:LTR	1	0	0	1	0	0	0	0	0	0	0	0	0	1	1	4	4	0	11
RLTR31B2:ERVK:LTR	0	0	0	0	1	1	0	0	-1	0	0	0	0	1	1	5	4	1	10
B1F2:Alu:SINE	0	0	0	1	1	1	0	0	0	0	1	0	0	0	0	4	4	0	11
RMER16:ERVK:LTR	0	0	0	1	1	1	0	0	-1	1	0	0	0	0	0	5	4	1	10
L1MEc:L1:LINE	0	0	0	1	0	1	0	0	-1	0	0	0	0	1	1	5	4	1	10
RLTR10D2:ERVK:LTR	1	0	0	0	0	1	0	0	0	1	0	0	0	0	1	4	4	0	11
MERVK26-int:ERVK:LTR	0	0	0	1	1	1	0	0	0	1	0	0	0	0	0	4	4	0	11
ID2:ID:SINE	0	0	0	0	1	1	0	0	-1	0	1	0	0	0	1	5	4	1	10
RMER13A1:ERVK:LTR	0	0	0	1	1	1	0	0	1	0	0	0	0	0	0	4	4	0	11
URR1B:hAT-Charlie:DNA	0	0	0	0	1	1	0	0	1	0	1	0	0	0	0	4	4	0	11
MIR3:MIR:SINE	0	0	0	0	0	1	0	0	1	0	1	0	0	1	0	4	4	0	11
L1ME3A:L1:LINE	0	0	0	0	1	1	0	0	1	0	1	0	0	0	0	4	4	0	11
Charlie1a:hAT-Charlie:DNA	0	0	0	1	0	1	0	0	0	0	1	0	0	1	0	4	4	0	11
MLT-int:ERVL-MaLR:LTR	0	0	0	1	0	1	0	0	1	0	-1	0	0	0	1	5	4	1	10
MT2A:ERVL:LTR	0	0	0	1	1	1	0	0	-1	0	0	0	0	1	0	5	4	1	10
Lx2A1:L1:LINE	1	0	0	0	0	0	0	0	1	1	0	0	0	0	1	4	4	0	11
ERVB4_1-I_MM:ERVK:LTR	1	0	0	1	0	1	0	0	0	0	0	0	0	0	1	4	4	0	11
RLTR30:ERV1:LTR	1	0	0	0	1	0	0	0	0	0	0	1	0	1	0	4	4	0	11
MT2B2:ERVL:LTR	0	0	0	1	1	1	0	0	-1	0	1	0	0	0	0	5	4	1	10
MLTR18C_MM:ERVK:LTR	1	0	0	1	0	1	0	0	1	0	0	0	0	0	0	4	4	0	11
ERVB7_2-LTR_MM:ERVK:LTR	0	0	0	0	0	0	0	0	1	1	0	0	0	1	1	4	4	0	11
NEP_1	0	0	0	0	1	1	1	1	0	0	0	0	0	0	0	4	4	0	11
L1M4:L1:LINE	0	0	0	0	1	1	0	0	-1	0	1	0	0	1	0	5	4	1	10
RLTR1A2_MM:ERV1:LTR	1	0	0	1	0	1	0	0	0	1	0	0	0	0	0	4	4	0	11
RLTR20B3A_MM:ERVK:LTR	1	1	0	1	0	1	0	0	-1	0	0	0	0	0	0	5	4	1	10
ORR1B1-int:ERVL-MaLR:LTR	0	0	0	1	1	1	0	0	0	0	1	0	0	0	0	4	4	0	11
ID_B1:B4:SINE	0	0	0	0	1	1	0	0	-1	0	1	0	0	1	0	5	4	1	10
B1F:Alu:SINE	0	0	0	1	1	1	0	0	-1	0	1	0	0	0	0	5	4	1	10
RMER12C:ERVK:LTR	0	0	0	1	1	1	0	0	1	-1	-1	0	0	0	0	6	4	2	9
MLTR12:ERV1:LTR	1	0	0	1	0	1	0	0	0	0	0	0	0	1	0	4	4	0	11
PA_1	0	0	0	0	1	1	1	1	0	0	0	0	0	0	0	4	4	0	11
L1MEf:L1:LINE	0	0	0	1	0	1	0	0	1	0	1	0	0	0	0	4	4	0	11
YREP_Mm:Unknown:Unknown	0	0	0	1	1	1	0	0	0	0	1	0	0	0	0	4	4	0	11
IAPLTR2a2_Mm:ERVK:LTR	0	0	0	0	1	1	0	0	-1	0	1	0	1	0	0	5	4	1	10
RLTR13B1:ERVK:LTR	1	0	0	1	0	1	0	0	0	0	-1	0	0	1	0	5	4	1	10
Charlie7:hAT-Charlie:DNA	0	0	0	1	0	1	0	0	0	0	1	0	0	0	1	4	4	0	11
NP_1	0	0	0	0	1	1	1	1	0	0	0	0	0	0	0	4	4	0	11
ID4:ID:SINE	0	0	0	1	0	1	0	0	0	0	1	0	0	1	0	4	4	0	11
RMER4B:ERVK:LTR	0	0	0	1	1	1	0	0	-1	0	1	0	0	0	0	5	4	1	10
HERV16-int:ERVL:LTR	0	0	0	0	0	1	0	0	1	1	0	0	0	0	1	4	4	0	11
RLTR19:ERVK:LTR	0	0	0	0	1	1	0	0	-1	0	1	0	0	0	1	5	4	1	10
MLT1A1:ERVL-MaLR:LTR	0	0	0	1	1	1	0	0	0	0	0	0	0	0	1	4	4	0	11
ORR1D1:ERVL-MaLR:LTR	0	0	0	0	1	1	0	0	-1	0	1	0	0	0	0	4	3	1	11
RLTR26:ERVK:LTR	0	0	0	1	1	1	0	0	0	0	0	0	0	0	0	3	3	0	12
L1MB4:L1:LINE	0	0	0	0	0	1	0	0	0	0	1	0	0	1	0	3	3	0	12
RLTR13A2:ERVK:LTR	0	0	0	0	1	0	0	0	1	0	0	0	0	1	0	3	3	0	12
MamRep605:LTR?:LTR?	0	0	0	1	0	1	0	0	0	0	0	1	0	0	0	3	3	0	12
ERV3-16A3_LTR:ERVL:LTR	0	0	0	1	0	0	0	0	-1	1	0	1	0	0	0	4	3	1	11
MER104:TcMar-Tc2:DNA	0	0	0	0	0	1	0	0	0	0	1	1	0	0	0	3	3	0	12
L1MA8:L1:LINE	1	0	0	0	0	1	0	0	0	0	1	0	0	0	0	3	3	0	12
ETnERV-int:ERVK:LTR	-1	0	0	0	1	1	0	0	-1	0	1	0	0	0	0	5	3	2	10
Lx10:L1:LINE	0	0	0	0	0	1	0	0	-1	0	1	0	0	0	1	4	3	1	11
IAPEY3C_LTR:ERVK:LTR	0	0	0	0	0	1	0	0	0	0	1	1	0	0	0	3	3	0	12
IAPEY4_I-int:ERVK:LTR	-1	0	0	-1	0	1	0	0	1	0	-1	0	0	1	0	6	3	3	9
RLTR10C:ERVK:LTR	0	0	0	1	1	1	-1	0	-1	0	0	0	0	0	0	5	3	2	10
IAPEY3-int:ERVK:LTR	0	0	0	0	0	1	0	0	0	0	0	0	1	0	1	3	3	0	12
B1F1:Alu:SINE	0	0	0	0	1	1	0	0	-1	0	1	0	0	0	0	4	3	1	11
RLTR10D:ERVK:LTR	1	1	0	0	1	0	0	0	0	0	0	0	0	0	0	3	3	0	12
MTE2b:ERVL-MaLR:LTR	0	0	0	1	0	1	0	0	-1	0	1	0	0	0	0	4	3	1	11
Lx5c:L1:LINE	0	0	0	1	1	1	0	0	0	0	0	0	0	0	0	3	3	0	12
MER5C:hAT-Charlie:DNA	0	0	0	1	0	0	0	0	1	0	1	0	0	0	0	3	3	0	12
RLTR10A:ERVK:LTR	0	0	0	1	0	1	0	0	-1	1	0	0	0	0	0	4	3	1	11
MMETn-int:ERVK:LTR	-1	0	0	0	1	1	0	0	-1	0	1	0	0	0	-1	6	3	3	9
MER77B:ERVL:LTR	0	0	0	1	0	0	0	0	0	0	1	0	0	0	1	3	3	0	12
L1MA10:L1:LINE	0	0	0	1	0	0	0	0	1	0	1	0	0	0	0	3	3	0	12
MLT1H:ERVL-MaLR:LTR	0	0	0	0	1	1	0	0	-1	0	1	0	0	0	0	4	3	1	11
B1_Mur3:Alu:SINE	0	0	0	0	0	1	0	0	1	0	1	0	0	0	0	3	3	0	12
Lx4B:L1:LINE	1	0	0	0	0	1	0	0	1	0	0	0	0	0	0	3	3	0	12
LTR37-int:ERV1:LTR	1	0	0	1	1	0	0	0	-1	0	0	0	0	0	0	4	3	1	11
RLTR9D:ERVK:LTR	0	0	0	0	0	1	0	0	1	0	0	0	0	0	1	3	3	0	12
RLTR13D3A:ERVK:LTR	0	0	0	0	1	0	0	0	-1	0	0	0	0	1	1	4	3	1	11
MTA_Mm-int:ERVL-MaLR:LTR	1	0	0	1	0	0	0	0	0	0	0	0	0	0	1	3	3	0	12
MLT1F1:ERVL-MaLR:LTR	0	0	0	1	0	1	0	0	-1	0	1	0	0	0	0	4	3	1	11
IAPLTR1a_Mm:ERVK:LTR	0	0	0	1	1	0	0	0	-1	0	0	0	0	0	1	4	3	1	11
HAL1b:L1:LINE	1	0	0	0	0	1	0	0	0	0	1	0	0	0	0	3	3	0	12
URR1A:hAT-Charlie:DNA	0	0	0	1	0	1	0	0	-1	0	1	0	0	0	0	4	3	1	11
L1M3:L1:LINE	0	0	0	1	0	1	0	0	0	0	1	0	0	0	0	3	3	0	12
RLTR44-int:ERVK:LTR	0	0	0	0	0	0	0	0	-1	0	1	0	0	1	1	4	3	1	11
BC1_Mm:scRNA:scRNA	0	0	0	0	0	1	0	0	1	0	1	0	0	0	0	3	3	0	12
L1MC4:L1:LINE	0	0	0	1	0	1	0	0	-1	0	1	0	0	0	0	4	3	1	11
L1MCa:L1:LINE	0	0	0	0	0	1	0	0	-1	0	0	0	0	1	1	4	3	1	11
L1MDb:L1:LINE	0	0	0	0	0	0	0	0	0	0	1	0	0	1	1	3	3	0	12
RLTR19C:ERVK:LTR	0	0	0	1	0	0	0	0	-1	0	1	0	0	1	0	4	3	1	11
LTR87:ERVL?:LTR	1	0	0	0	0	1	0	0	0	0	0	0	0	1	0	3	3	0	12
MTE-int:ERVL-MaLR:LTR	0	0	0	1	0	1	0	0	0	0	0	0	0	0	1	3	3	0	12
RMER4A:ERVK:LTR	0	0	0	1	0	1	0	0	-1	0	1	0	0	0	0	4	3	1	11
RMER6C:ERVK:LTR	1	0	0	1	0	1	0	0	0	0	0	0	0	0	0	3	3	0	12
RMER6D:ERVK:LTR	0	0	0	0	0	0	0	0	1	0	1	0	0	0	1	3	3	0	12
IAPEY4_LTR:ERVK:LTR	0	0	0	-1	-1	1	0	1	1	0	-1	0	-1	0	-1	8	3	5	7
MER106A:hAT-Charlie:DNA	1	0	0	1	0	0	0	0	0	0	0	0	0	1	0	3	3	0	12
MTB_Mm-int:ERVL-MaLR:LTR	1	0	0	0	0	1	0	0	1	0	0	0	0	0	0	3	3	0	12
ID:ID:SINE	0	0	0	1	0	1	0	0	-1	0	1	0	0	0	0	4	3	1	11
RLTR50B:ERVK:LTR	1	1	0	1	0	0	0	0	-1	0	0	0	0	0	0	4	3	1	11
MLT1-int:ERVL-MaLR:LTR	1	0	0	1	0	0	0	0	1	-1	0	0	0	0	0	4	3	1	11
ERVB5_2-LTR_MM:ERVK:LTR	1	0	0	1	0	0	0	0	-1	0	0	0	0	1	0	4	3	1	11
RLTR14-int:ERV1:LTR	1	0	0	0	0	1	0	0	-1	0	1	0	0	0	0	4	3	1	11
MER58A:hAT-Charlie:DNA	0	0	0	0	0	1	0	0	0	0	1	0	0	1	0	3	3	0	12
ERVB4_1C-LTR_Mm:ERVK:LTR	0	0	0	1	0	0	0	0	0	1	0	0	0	1	0	3	3	0	12
RLTR17C_Mm:ERVK:LTR	1	0	0	1	0	1	0	0	0	0	0	0	0	0	0	3	3	0	12
PB1D7:Alu:SINE	0	0	0	0	1	1	0	0	0	0	1	0	0	0	0	3	3	0	12
IAPLTR2b:ERVK:LTR	0	0	0	1	1	0	0	0	-1	0	0	0	0	0	1	4	3	1	11
MTE2b-int:ERVL-MaLR:LTR	0	0	0	0	1	1	0	0	0	0	1	0	0	0	0	3	3	0	12
RMER17B:ERVK:LTR	0	0	0	0	0	1	0	0	1	0	1	0	0	0	0	3	3	0	12
L1MCc:L1:LINE	0	0	0	1	0	0	0	0	-1	0	0	0	0	1	1	4	3	1	11
RLTR16B_MM:ERVK:LTR	0	0	0	1	0	1	0	0	1	0	0	0	0	0	0	3	3	0	12
MLT1A:ERVL-MaLR:LTR	0	0	0	1	0	1	0	0	-1	0	1	0	0	0	0	4	3	1	11
LTR82A:ERVL:LTR	1	0	0	-1	0	0	0	0	1	0	0	0	0	1	0	4	3	1	11
RLTR31_Mm:ERVK:LTR	0	0	0	1	0	0	0	0	0	1	1	0	0	0	0	3	3	0	12
MurERV4-int:ERVK:LTR	0	0	0	0	1	1	0	0	0	1	0	0	0	0	0	3	3	0	12
RMER19C:ERVK:LTR	0	0	0	1	1	1	0	0	-1	0	0	0	0	0	0	4	3	1	11
L2a:L2:LINE	0	0	0	0	1	1	0	0	-1	0	1	0	0	0	0	4	3	1	11
IAPEY5_LTR:ERVK:LTR	1	0	0	0	0	1	0	0	0	0	0	0	0	1	0	3	3	0	12
Looper:PiggyBac:DNA	0	0	0	0	1	1	0	0	1	0	0	0	0	0	0	3	3	0	12
IAPLTR2a:ERVK:LTR	0	0	0	0	1	0	0	0	0	0	1	0	0	-1	1	4	3	1	11
L1M7:L1:LINE	1	0	0	1	0	0	0	0	0	0	0	0	0	0	1	3	3	0	12
L2b:L2:LINE	0	0	0	0	0	1	0	0	-1	0	1	0	0	1	0	4	3	1	11
IAPLTR1_Mm:ERVK:LTR	0	0	0	0	1	1	0	0	1	0	0	0	0	0	0	3	3	0	12
L1ME4c:L1:LINE	0	0	0	0	0	1	0	0	0	0	1	0	0	0	1	3	3	0	12
IAP-d-int:ERVK:LTR	1	1	0	0	0	0	0	0	0	0	0	0	0	0	1	3	3	0	12
MYSERV6-int:ERVK:LTR	0	0	0	1	1	1	0	0	-1	0	0	0	0	0	0	4	3	1	11
RLTR1D:ERV1:LTR	0	0	0	1	0	0	0	0	0	0	0	0	0	1	1	3	3	0	12
RMER16-int:ERVK:LTR	-1	0	0	1	0	1	0	0	0	0	1	0	0	0	0	4	3	1	11
RMER6B:ERVK:LTR	0	0	0	1	0	1	0	0	0	0	1	0	0	0	0	3	3	0	12
L1M4c:L1:LINE	0	0	0	1	0	1	0	0	0	0	1	0	0	0	0	3	3	0	12
RLTR30E_MM:ERV1:LTR	0	0	0	1	0	1	0	0	1	0	0	0	0	0	0	3	3	0	12
MLTR11B:ERVK:LTR	0	0	0	1	1	1	0	0	0	0	0	0	0	0	0	3	3	0	12
LTR33A:ERVL:LTR	0	0	0	1	0	1	0	0	-1	0	0	0	0	0	1	4	3	1	11
RLTR12B2:ERVK:LTR	0	0	0	1	0	0	0	0	0	0	0	1	0	1	0	3	3	0	12
B4:B4:SINE	0	0	0	0	0	1	0	0	1	0	1	0	0	0	0	3	3	0	12
L1MC1:L1:LINE	0	0	0	0	0	1	0	0	1	0	1	0	0	0	0	3	3	0	12
IAPEY2_LTR:ERVK:LTR	0	0	0	0	0	1	0	0	-1	0	0	0	0	1	1	4	3	1	11
Charlie1b:hAT-Charlie:DNA	0	0	0	0	0	1	0	0	1	0	1	0	0	0	0	3	3	0	12
LTR101_Mam:ERVL:LTR	1	0	0	1	0	0	0	0	-1	0	0	0	0	1	0	4	3	1	11
L1MB5:L1:LINE	0	0	0	0	1	1	0	0	-1	0	1	0	0	0	0	4	3	1	11
L1ME2:L1:LINE	0	0	0	1	0	1	0	0	0	0	1	0	0	0	0	3	3	0	12
RLTR1D2_MM:ERV1:LTR	0	0	0	0	0	0	0	0	0	1	0	0	0	1	1	3	3	0	12
BGLII_A:ERVK:LTR	1	0	0	1	0	0	0	0	0	0	1	0	0	0	0	3	3	0	12
RLTR13B2:ERVK:LTR	0	0	0	1	0	0	0	0	0	1	0	0	0	0	1	3	3	0	12
L1_Mur1:L1:LINE	0	0	0	0	1	1	0	0	-1	0	1	0	0	0	0	4	3	1	11
RLTR30D2_MM:ERV1:LTR	0	0	0	1	0	1	0	0	-1	0	0	0	0	0	1	4	3	1	11
RLTR13D4:ERVK:LTR	0	0	0	0	0	1	0	0	1	1	0	0	0	0	0	3	3	0	12
RCHARR1:hAT-Charlie:DNA	0	0	0	1	0	1	0	0	-1	0	1	0	0	0	0	4	3	1	11
ORR1C1-int:ERVL-MaLR:LTR	1	0	0	1	0	1	0	0	0	0	0	0	0	0	0	3	3	0	12
IAPA_MM-int:ERVK:LTR	0	0	0	1	1	1	0	0	0	0	0	0	0	0	0	3	3	0	12
ORR1A4-int:ERVL-MaLR:LTR	0	0	0	0	0	1	0	0	-1	0	1	0	0	0	1	4	3	1	11
MLT1G:ERVL-MaLR:LTR	0	0	0	1	0	1	0	0	1	0	0	0	0	0	0	3	3	0	12
L2c:L2:LINE	0	0	0	0	1	1	0	0	-1	0	1	0	0	0	0	4	3	1	11
L1MB2:L1:LINE	0	0	0	0	0	1	0	0	-1	0	1	0	0	0	1	4	3	1	11
RMER1C:Other:Other	0	0	0	0	0	1	0	0	1	0	1	0	0	0	0	3	3	0	12
RMER20A:ERVK:LTR	1	0	0	1	0	0	0	0	-1	0	0	0	0	0	1	4	3	1	11
LTR16A1:ERVL:LTR	0	0	0	0	0	0	0	0	-1	0	1	0	0	1	1	4	3	1	11
U6:snRNA:snRNA	0	0	0	1	0	1	0	0	0	0	1	0	0	0	0	3	3	0	12
MER90a:ERV1:LTR	0	0	0	0	0	1	0	0	1	0	1	0	0	0	0	3	3	0	12
Lx2B:L1:LINE	0	0	0	1	0	1	0	0	-1	1	0	0	0	0	0	4	3	1	11
L1MDa:L1:LINE	0	0	0	1	0	0	0	0	-1	0	1	0	0	0	1	4	3	1	11
RLTR15:ERVK:LTR	0	0	0	0	1	1	0	0	0	0	1	0	0	0	0	3	3	0	12
RLTR13A3:ERVK:LTR	1	0	0	0	1	0	0	0	-1	0	0	0	0	1	0	4	3	1	11
L1ME3Cz:L1:LINE	0	0	0	1	0	1	0	0	0	0	0	0	0	1	0	3	3	0	12
MMTV-int:ERVK:LTR	1	0	0	1	0	0	0	0	0	-1	-1	0	0	0	1	5	3	2	10
MER63C:hAT-Blackjack:DNA	0	0	0	0	-1	0	0	0	1	0	0	0	1	0	0	3	2	1	12
LTRIS_Mus:ERV1:LTR	0	0	0	0	0	1	0	0	-1	0	1	0	0	0	0	3	2	1	12
MER57E1:ERV1:LTR	1	0	0	1	0	0	0	0	0	0	0	0	0	0	0	2	2	0	13
L1MC2:L1:LINE	0	0	0	0	0	1	0	0	-1	0	1	0	0	0	0	3	2	1	12
LTR41B:ERVL:LTR	0	0	0	0	0	1	0	0	1	0	0	0	0	0	0	2	2	0	13
MLT1E1:ERVL-MaLR:LTR	0	0	0	1	0	0	0	0	-1	0	1	0	0	0	0	3	2	1	12
BGLII_B2:ERVK:LTR	0	0	0	1	0	0	0	0	1	0	0	0	0	0	0	2	2	0	13
IAPLTR2_Mm:ERVK:LTR	0	0	0	0	1	1	0	0	-1	0	0	0	0	0	0	3	2	1	12
L1M3b:L1:LINE	1	0	0	1	0	0	0	0	0	0	0	0	0	0	0	2	2	0	13
L1MC:L1:LINE	0	0	0	0	0	1	0	0	0	0	1	0	0	0	0	2	2	0	13
MER126:DNA:DNA	0	0	0	0	0	0	0	0	0	1	0	1	0	0	0	2	2	0	13
L1ME3B:L1:LINE	0	0	0	0	0	1	0	0	0	0	1	0	0	0	0	2	2	0	13
LTR53-int:ERVL:LTR	1	1	0	0	0	0	0	0	0	0	0	0	0	0	0	2	2	0	13
RMER13B:ERVK:LTR	0	0	0	0	0	1	0	0	-1	0	0	0	1	0	0	3	2	1	12
RLTR44D:ERVK:LTR	0	0	0	0	0	0	0	0	0	0	0	0	0	1	1	2	2	0	13
LTR16A:ERVL:LTR	0	0	0	0	0	1	0	0	-1	1	0	0	0	0	0	3	2	1	12
RLTR19A:ERVK:LTR	0	0	0	-1	0	1	0	0	1	0	0	0	0	0	0	3	2	1	12
SSU-rRNA_Hsa:rRNA:rRNA	1	0	0	0	0	0	0	0	1	0	0	0	0	0	0	2	2	0	13
RLTR34D_MM:ERVK:LTR	0	0	0	0	0	0	0	0	0	1	1	0	0	0	0	2	2	0	13
RLTR9F:ERVK:LTR	0	0	0	1	0	0	0	0	-1	0	1	0	0	0	0	3	2	1	12
MLT1H2:ERVL-MaLR:LTR	0	0	0	0	0	0	0	0	-1	0	1	0	0	1	0	3	2	1	12
L3:CR1:LINE	-1	0	0	0	0	1	0	0	0	0	1	0	0	0	0	3	2	1	12
RLTR9E:ERVK:LTR	0	0	0	1	0	1	0	0	0	0	0	0	0	0	0	2	2	0	13
L5:RTE-X:LINE	1	0	0	1	0	0	0	0	0	0	0	0	0	0	0	2	2	0	13
Tigger18a:TcMar-Tigger:DNA	0	0	0	0	0	0	0	0	1	0	1	0	0	0	0	2	2	0	13
RLTR26_Mus:ERVK:LTR	0	0	0	1	0	0	0	0	-1	0	0	0	0	0	1	3	2	1	12
MER20:hAT-Charlie:DNA	0	0	0	0	0	1	0	0	-1	0	1	0	0	0	0	3	2	1	12
Lx3B:L1:LINE	0	0	0	0	0	1	0	0	1	0	0	0	0	0	0	2	2	0	13
LTR79:ERVL:LTR	0	0	0	0	0	1	0	0	-1	0	1	0	0	0	0	3	2	1	12
RLTR9A2:ERVK:LTR	0	0	0	1	0	0	0	0	-1	0	0	0	0	0	1	3	2	1	12
MLT1K:ERVL-MaLR:LTR	0	0	0	0	0	1	0	0	0	0	1	0	0	0	0	2	2	0	13
MamRep605b:LTR?:LTR?	0	0	0	1	0	0	0	0	0	0	1	0	0	0	0	2	2	0	13
MLT1N2:ERVL-MaLR:LTR	0	0	0	0	0	0	0	0	1	0	1	0	0	0	0	2	2	0	13
BGLII_Mus:ERVK:LTR	1	0	0	1	0	0	0	0	0	0	0	0	0	0	0	2	2	0	13
L1MD2:L1:LINE	0	0	0	0	0	1	0	0	0	0	1	0	0	0	0	2	2	0	13
MTA_Mm:ERVL-MaLR:LTR	1	0	0	1	0	0	0	0	0	0	0	0	0	0	0	2	2	0	13
MER21C:ERVL:LTR	0	0	0	0	0	1	0	0	-1	0	1	0	0	0	0	3	2	1	12
MLT1G1:ERVL-MaLR:LTR	0	0	0	0	0	0	0	0	-1	0	1	0	0	0	1	3	2	1	12
LTR55:ERVL?:LTR	0	0	0	1	0	0	0	0	1	0	0	0	0	0	0	2	2	0	13
Tigger5a_Glire:TcMar-Tigger:DNA	0	0	0	1	0	0	0	0	0	0	1	0	0	0	0	2	2	0	13
RLTR13D6:ERVK:LTR	1	0	0	0	0	1	0	0	0	0	0	0	0	0	0	2	2	0	13
RLTR34B_MM:ERVK:LTR	1	0	0	0	0	1	0	0	0	0	0	0	0	0	0	2	2	0	13
RLTR19-int:ERVK:LTR	1	0	0	1	0	0	0	0	0	0	0	0	0	0	0	2	2	0	13
MERV1_LTR:ERV1:LTR	0	0	0	0	1	1	0	0	0	0	0	0	0	0	0	2	2	0	13
RLTR20A3_MM:ERVK:LTR	0	0	0	1	0	1	0	0	-1	0	0	0	0	0	0	3	2	1	12
RLTR19B:ERVK:LTR	0	0	0	0	1	0	0	0	1	0	0	0	0	0	0	2	2	0	13
HAL1:L1:LINE	0	0	0	0	0	1	0	0	0	0	1	0	0	0	0	2	2	0	13
MLT1C2:ERVL-MaLR:LTR	0	0	0	0	1	1	0	0	-1	0	0	0	0	0	0	3	2	1	12
RLTR48B:ERV1:LTR	1	0	0	1	0	0	0	0	0	0	0	0	0	0	0	2	2	0	13
RLTR13A:ERVK:LTR	0	0	0	0	0	0	0	0	1	0	0	0	0	1	0	2	2	0	13
MER52-int:ERV1:LTR	1	0	0	1	0	0	0	0	-1	0	0	0	0	0	0	3	2	1	12
RMER6BA:ERVK:LTR	0	0	0	1	0	1	0	0	0	0	0	0	0	0	0	2	2	0	13
RLTR9A:ERVK:LTR	0	0	0	0	0	0	0	0	1	0	0	1	0	0	0	2	2	0	13
5S:rRNA:rRNA	0	0	0	0	0	0	0	0	1	0	0	1	0	0	0	2	2	0	13
L1MA5:L1:LINE	0	0	0	0	0	1	0	0	-1	0	1	0	0	0	0	3	2	1	12
LTR78:ERV1:LTR	0	0	0	0	1	0	0	0	0	1	0	0	0	0	0	2	2	0	13
RLTR30B_MM:ERV1:LTR	0	0	0	0	1	1	0	0	0	0	0	0	0	0	0	2	2	0	13
L1ME3G:L1:LINE	0	0	0	0	0	1	0	0	-1	0	1	0	0	0	0	3	2	1	12
MER102c:hAT-Charlie:DNA	0	0	0	0	1	0	0	0	-1	0	1	0	0	0	0	3	2	1	12
L1M1:L1:LINE	0	0	0	0	0	1	0	0	1	0	0	0	0	0	0	2	2	0	13
RLTR53B_Mm:ERVK:LTR	1	1	0	0	0	0	0	0	0	0	0	0	0	0	0	2	2	0	13
L1MC5a:L1:LINE	0	0	0	0	0	1	0	0	-1	0	1	0	0	0	0	3	2	1	12
LTR16B2:ERVL:LTR	0	0	0	0	0	1	0	0	1	0	0	0	0	0	0	2	2	0	13
RMER19B2:ERVK:LTR	0	0	0	0	0	1	0	0	-1	0	1	0	0	0	0	3	2	1	12
MER68B:ERVL:LTR	1	0	0	0	0	0	0	0	1	0	0	0	0	0	0	2	2	0	13
Lx2A:L1:LINE	0	0	0	0	0	1	0	0	0	1	0	0	0	0	0	2	2	0	13
MTEa-int:ERVL-MaLR:LTR	0	0	0	0	0	1	0	0	0	0	1	0	0	0	0	2	2	0	13
MT2_Mm:ERVL:LTR	0	0	0	0	0	1	0	0	0	0	1	0	0	0	0	2	2	0	13
RLTR31M:ERVK:LTR	0	0	0	0	0	1	0	0	1	0	0	0	0	0	0	2	2	0	13
L1M3d:L1:LINE	0	0	0	0	0	1	0	0	-1	0	1	0	0	0	0	3	2	1	12
RLTR20B5_MM:ERVK:LTR	0	0	0	0	0	1	0	0	0	1	0	0	0	0	0	2	2	0	13
RMER16B2:ERVK:LTR	-1	0	0	1	0	0	0	0	1	0	0	0	0	0	0	3	2	1	12
ORR1E-int:ERVL-MaLR:LTR	0	0	0	0	1	1	0	0	-1	0	0	0	0	0	0	3	2	1	12
MLT1A0:ERVL-MaLR:LTR	0	0	0	1	0	1	0	0	-1	0	0	0	0	0	0	3	2	1	12
ORR1B1:ERVL-MaLR:LTR	0	0	0	0	1	1	0	0	-1	0	0	0	0	0	0	3	2	1	12
LTR91:LTR:LTR	0	0	0	0	0	1	0	0	-1	1	0	0	0	0	0	3	2	1	12
MER77:ERVL:LTR	0	0	0	0	0	1	0	0	0	0	1	0	0	0	0	2	2	0	13
MLTR18A_MM:ERVK:LTR	0	0	0	0	0	0	0	0	-1	0	1	1	0	0	0	3	2	1	12
L2:L2:LINE	0	0	0	0	0	1	0	0	-1	0	1	0	0	0	0	3	2	1	12
RLTR16:ERVK:LTR	0	0	0	1	0	1	0	0	0	0	0	0	0	0	0	2	2	0	13
L1ME3D:L1:LINE	0	0	0	0	0	1	0	0	-1	0	1	0	0	0	0	3	2	1	12
LTR84b:ERVL:LTR	0	0	0	1	0	0	0	0	1	0	0	0	0	0	0	2	2	0	13
RLTR53_Mm:ERVK:LTR	0	0	0	1	0	0	0	0	1	0	0	0	0	0	0	2	2	0	13
Tigger8:TcMar-Tigger:DNA	0	0	0	1	0	0	0	0	-1	0	0	0	0	1	0	3	2	1	12
MLTR31D_MM:ERVK:LTR	0	0	0	1	0	0	0	0	0	0	1	0	0	0	0	2	2	0	13
Charlie29a:hAT-Charlie:DNA	0	0	0	1	0	0	0	0	0	0	0	1	0	0	0	2	2	0	13
RLTR25A:ERVK:LTR	0	0	0	1	0	1	0	0	0	0	0	0	0	0	0	2	2	0	13
MLT1E2:ERVL-MaLR:LTR	0	0	0	1	0	1	0	0	0	0	0	0	0	0	0	2	2	0	13
RLTR12A:ERVK:LTR	0	0	0	0	0	0	0	0	1	0	1	0	0	0	0	2	2	0	13
MIRb:MIR:SINE	0	0	0	0	0	1	0	0	-1	0	1	0	0	0	0	3	2	1	12
RLTR42:ERVK:LTR	0	0	0	1	0	1	0	0	0	0	0	0	0	0	0	2	2	0	13
L1MC5:L1:LINE	0	0	0	1	0	1	0	0	-1	0	0	0	0	0	0	3	2	1	12
MLT1E3:ERVL-MaLR:LTR	1	0	0	1	0	0	0	0	0	0	0	0	0	0	0	2	2	0	13
ORR1D-int:ERVL-MaLR:LTR	0	0	0	1	0	0	0	0	0	0	0	0	0	0	1	2	2	0	13
L1MB7:L1:LINE	0	0	0	0	0	1	0	0	0	0	1	0	0	0	0	2	2	0	13
RLTR10E:ERVK:LTR	1	0	0	0	0	0	0	0	0	0	0	0	0	1	0	2	2	0	13
MER89-int:ERV1:LTR	1	0	0	0	0	0	0	0	0	0	0	0	0	1	0	2	2	0	13
RLTR27:ERVK:LTR	0	0	0	0	0	0	0	0	-1	1	1	0	0	0	0	3	2	1	12
MER34A:ERV1:LTR	1	0	0	1	0	0	0	0	-1	0	0	0	0	0	0	3	2	1	12
RLTR12D:ERVK:LTR	0	0	0	0	0	1	0	0	-1	0	1	0	0	0	0	3	2	1	12
ERVB4_2-I_MM:ERVK:LTR	0	0	0	0	0	1	0	0	0	0	0	0	1	0	0	2	2	0	13
MTC-int:ERVL-MaLR:LTR	0	0	0	0	0	1	0	0	0	0	1	0	0	0	0	2	2	0	13
RLTR51B_Mm:ERVK?:LTR	0	0	0	0	0	1	0	0	1	0	0	0	0	0	0	2	2	0	13
MER103C:hAT-Charlie:DNA	0	0	0	0	0	0	0	0	1	0	1	0	0	0	0	2	2	0	13
RMER1A:Other:Other	0	0	0	0	1	1	0	0	0	0	0	0	0	0	0	2	2	0	13
MYSERV16_I-int:ERVK:LTR	0	0	0	1	0	0	0	0	0	0	1	0	0	0	0	2	2	0	13
ORR1F-int:ERVL-MaLR:LTR	0	0	0	0	0	1	0	0	-1	0	1	0	0	0	0	3	2	1	12
MLT1B:ERVL-MaLR:LTR	0	0	0	0	0	1	0	0	0	0	1	0	0	0	0	2	2	0	13
RLTR40:ERVK:LTR	-1	0	0	-1	0	1	0	0	-1	0	1	0	0	0	0	5	2	3	10
RLTR45-int:ERVK:LTR	1	0	0	1	0	0	0	0	-1	-1	0	0	0	0	0	4	2	2	11
RMER21B:ERV1:LTR	0	0	0	0	1	1	0	0	0	0	0	0	0	0	0	2	2	0	13
7SK:RNA:RNA	0	0	0	0	1	0	0	0	1	0	0	0	0	0	0	2	2	0	13
RLTR34C_MM:ERVK:LTR	0	0	0	1	0	0	0	0	1	0	0	0	0	0	0	2	2	0	13
IAPEz-int:ERVK:LTR	0	0	0	0	1	1	0	0	0	0	0	0	0	0	0	2	2	0	13
IAPEY3_LTR:ERVK:LTR	0	0	0	1	0	0	0	0	0	0	0	0	0	0	1	2	2	0	13
Charlie15a:hAT-Charlie:DNA	0	0	0	1	0	0	0	0	0	0	0	0	0	0	1	2	2	0	13
RLTR44B:ERVK:LTR	0	0	0	0	0	1	0	0	-1	0	0	0	0	0	1	3	2	1	12
LTR16:ERVL:LTR	0	0	0	1	0	0	0	0	0	0	0	0	0	0	1	2	2	0	13
L1MEg:L1:LINE	0	0	0	0	0	1	0	0	0	0	1	0	0	0	0	2	2	0	13
L1M4a1:L1:LINE	-1	0	0	0	0	1	0	0	1	0	0	0	0	0	0	3	2	1	12
MER5A1:hAT-Charlie:DNA	0	0	0	0	0	1	0	0	-1	0	1	0	0	0	0	3	2	1	12
ERVB4_3-I_MM:ERVK:LTR	1	0	0	0	0	0	0	0	0	1	0	0	-1	0	0	3	2	1	12
RLTR22_Mur:ERVK:LTR	-1	0	0	0	0	1	0	0	-1	1	0	0	0	0	0	4	2	2	11
RLTR24:ERV1:LTR	0	0	0	0	0	1	0	0	0	0	1	0	0	0	0	2	2	0	13
RMER13A:ERVK:LTR	0	0	0	0	1	1	0	0	0	0	0	0	0	0	0	2	2	0	13
L1M3a:L1:LINE	0	0	0	0	1	0	0	0	0	0	0	0	1	0	0	2	2	0	13
LTR16D:ERVL:LTR	0	0	0	0	1	0	0	0	1	0	0	0	0	0	0	2	2	0	13
MER67B:ERV1:LTR	0	0	0	0	1	1	0	0	-1	0	0	0	0	0	0	3	2	1	12
MER34B-int:ERV1:LTR	0	0	0	0	1	0	0	0	0	0	1	0	0	0	0	2	2	0	13
L1MB8:L1:LINE	0	0	0	0	0	1	0	0	-1	0	1	0	0	0	0	3	2	1	12
MER5B:hAT-Charlie:DNA	0	0	0	0	1	1	0	0	0	0	0	0	0	0	0	2	2	0	13
Tigger2b:TcMar-Tigger:DNA	0	0	0	1	0	0	0	0	1	0	0	0	0	0	0	2	2	0	13
SRV_MM-int:ERVK:LTR	1	0	0	0	0	0	0	0	-1	1	0	0	0	0	0	3	2	1	12
RLTR18-int:ERVK:LTR	0	0	0	0	0	1	0	0	0	0	0	0	0	0	1	2	2	0	13
RMER19A:ERVK:LTR	0	0	0	0	0	1	0	0	-1	0	0	0	0	0	1	3	2	1	12
ERVB4_2-LTR_MM:ERVK:LTR	0	0	0	1	1	0	0	0	-1	0	0	0	0	-1	0	4	2	2	11
RLTR42-int:ERVK:LTR	0	0	0	0	1	1	0	0	-1	0	0	0	0	0	0	3	2	1	12
MER81:hAT-Blackjack:DNA	0	0	0	1	0	0	0	0	0	0	1	0	0	0	0	2	2	0	13
RLTR12G:ERVK:LTR	0	0	0	0	0	1	0	0	0	1	0	0	0	0	0	2	2	0	13
LTR80B:ERVL:LTR	1	0	0	0	0	0	0	0	0	1	0	-1	0	0	0	3	2	1	12
RLTR17D_Mm:ERVK:LTR	0	0	0	1	0	0	0	0	0	0	0	0	0	1	0	2	2	0	13
MER58C:hAT-Charlie:DNA	0	0	0	0	0	0	0	0	0	0	0	-1	0	1	1	3	2	1	12
RMER17B2:ERVK:LTR	0	0	0	1	0	1	0	0	-1	0	0	0	0	0	0	3	2	1	12
RLTR26B_MM:ERVK:LTR	1	0	0	1	0	0	0	0	0	0	0	0	0	0	0	2	2	0	13
MER115:hAT-Tip100:DNA	0	0	0	0	0	0	0	0	-1	1	0	0	0	0	1	3	2	1	12
EutTc1-N2:TcMar-Tc1:DNA	0	0	0	1	0	0	0	0	0	0	0	0	0	1	0	2	2	0	13
MER67C:ERV1:LTR	0	0	0	0	0	1	0	0	0	0	0	1	0	0	0	2	2	0	13
RLTR18:ERVK:LTR	0	0	0	0	0	1	0	0	0	1	0	0	0	0	0	2	2	0	13
RLTR20B2:ERVK:LTR	0	0	0	0	0	1	0	0	0	0	1	0	0	0	0	2	2	0	13
LTR104_Mam:Gypsy:LTR	0	0	0	0	0	0	0	0	1	0	0	1	0	0	0	2	2	0	13
MER2:TcMar-Tigger:DNA	0	0	0	0	0	1	0	0	0	0	1	0	0	0	0	2	2	0	13
RLTR12E:ERVK:LTR	0	0	0	0	1	0	0	0	-1	0	1	0	0	0	0	3	2	1	12
L1MEh:L1:LINE	0	0	0	1	0	1	0	0	-1	0	0	0	0	0	0	3	2	1	12
RMER20B:ERVK:LTR	0	0	0	0	0	1	0	0	0	1	0	0	0	0	0	2	2	0	13
LTR16E1:ERVL:LTR	0	0	0	1	0	0	0	0	0	1	0	0	0	0	0	2	2	0	13
L1MD:L1:LINE	0	0	0	1	0	1	0	0	0	0	0	0	0	0	0	2	2	0	13
MT2C_Mm:ERVL:LTR	0	0	0	0	0	1	0	0	0	0	0	0	0	1	0	2	2	0	13
ERVB4_1B-I_MM:ERVK:LTR	-1	0	0	1	1	0	0	0	0	0	0	0	0	0	0	3	2	1	12
MLT2C1:ERVL:LTR	0	0	0	0	0	0	0	0	1	1	0	0	0	0	0	2	2	0	13
RLTR18B:ERVK:LTR	0	0	0	0	0	1	0	0	-1	0	1	0	0	0	0	3	2	1	12
MER63B:hAT-Blackjack:DNA	0	0	0	0	0	1	0	0	0	-1	1	0	0	0	0	3	2	1	12
7SLRNA:srpRNA:srpRNA	0	0	0	1	0	0	0	0	1	0	0	0	0	0	0	2	2	0	13
MLT1D-int:ERVL-MaLR:LTR	0	0	0	1	0	0	0	0	0	0	0	0	0	0	1	2	2	0	13
ERV3-16A3_I-int:ERVL:LTR	-1	0	0	0	0	1	0	0	-1	1	0	0	0	0	0	4	2	2	11
L1ME3:L1:LINE	0	0	0	0	0	0	0	0	1	0	1	0	0	0	0	2	2	0	13
MLTR31E_MM:ERVK:LTR	0	0	0	0	0	0	0	0	0	0	0	0	0	1	1	2	2	0	13
MurSAT1:Satellite:Satellite	1	0	0	0	0	1	0	0	-1	0	0	0	0	-1	0	4	2	2	11
MER113A:hAT-Charlie:DNA	0	0	0	0	0	0	0	0	-1	0	1	0	0	0	0	2	1	1	13
MER113:hAT-Charlie:DNA	0	0	0	1	0	0	0	0	-1	0	-1	0	0	0	0	3	1	2	12
MLT1L:ERVL-MaLR:LTR	0	0	0	0	0	1	0	0	-1	0	0	0	0	0	0	2	1	1	13
RLTR21:ERVK:LTR	0	0	0	0	0	1	0	0	0	0	0	0	0	0	0	1	1	0	14
RLTR20C1_MM:ERVK:LTR	0	0	0	0	0	0	0	0	1	0	0	0	0	0	0	1	1	0	14
Lx3A:L1:LINE	0	0	0	1	0	0	0	0	-1	0	0	0	0	0	0	2	1	1	13
RLTR30C_MM:ERV1:LTR	1	0	0	0	0	0	0	0	0	0	0	0	0	0	0	1	1	0	14
L1ME3C:L1:LINE	0	0	0	0	0	0	0	0	0	0	0	0	0	0	1	1	1	0	14
RLTR10F:ERVK:LTR	0	0	0	0	0	0	0	0	-1	0	1	0	0	0	0	2	1	1	13
Tigger12:TcMar-Tigger:DNA	0	0	0	0	0	0	0	0	0	0	0	0	1	0	0	1	1	0	14
MusHAL1:L1:LINE	0	0	0	0	0	0	0	0	1	0	0	0	0	0	0	1	1	0	14
Charlie22a:hAT-Charlie:DNA	1	0	0	0	0	0	0	0	0	0	0	0	0	0	0	1	1	0	14
L1MEb:L1:LINE	0	0	0	0	0	1	0	0	0	0	0	0	0	0	0	1	1	0	14
Charlie13a:hAT-Charlie:DNA	1	0	0	0	0	0	0	0	0	0	0	0	0	0	0	1	1	0	14
RLTR26D_MM:ERVK:LTR	0	0	0	0	1	0	0	0	-1	0	0	0	0	0	0	2	1	1	13
RLTR20A4:ERVK:LTR	0	0	0	0	0	0	0	0	-1	0	0	0	0	0	1	2	1	1	13
LTR78B:ERV1:LTR	0	0	0	1	0	0	0	0	0	0	0	0	0	0	0	1	1	0	14
RLTR13C1:ERVK:LTR	0	0	0	0	0	1	0	0	0	0	0	0	0	0	0	1	1	0	14
L2d2:L2:LINE	0	0	0	0	0	1	0	0	0	0	0	0	0	0	0	1	1	0	14
RLTR1F_Mm:ERVK:LTR	0	0	0	0	1	0	0	0	-1	0	0	0	0	0	0	2	1	1	13
UCON9:Unknown:Unknown	0	0	0	0	0	0	0	0	1	0	0	0	0	0	0	1	1	0	14
MER34:ERV1:LTR	0	0	0	1	0	0	0	0	-1	0	0	0	0	0	0	2	1	1	13
RLTR13B3:ERVK:LTR	-1	0	0	0	0	0	0	0	0	-1	-1	0	1	0	0	4	1	3	11
RLTR9D2:ERVK:LTR	0	0	0	0	0	0	0	0	0	0	0	0	0	0	1	1	1	0	14
CYRA11_Mm:Y-chromosome:Unknown	0	0	0	0	0	0	0	0	1	0	0	0	0	0	0	1	1	0	14
MLTR25A:ERVK:LTR	0	0	0	0	0	1	0	0	0	0	0	0	0	0	0	1	1	0	14
RLTR13C3:ERVK:LTR	0	0	0	0	0	0	0	0	0	0	0	1	0	0	0	1	1	0	14
MER21B:ERVL:LTR	0	0	0	0	0	1	0	0	-1	0	0	0	0	0	0	2	1	1	13
MMERVK9E_I-int:ERVK:LTR	0	0	0	0	0	1	0	0	0	0	0	0	0	0	0	1	1	0	14
ERVL-int:ERVL:LTR	0	0	0	0	0	0	0	0	-1	1	0	0	0	0	0	2	1	1	13
LX3:L1:LINE	0	0	0	0	0	0	0	0	1	0	0	0	0	0	0	1	1	0	14
RLTR20B4_MM:ERVK:LTR	0	0	0	0	0	0	0	0	0	1	0	0	0	0	0	1	1	0	14
L1MB1:L1:LINE	0	0	0	0	0	1	0	0	0	0	0	0	0	0	0	1	1	0	14
Kanga11a:TcMar-Tc2:DNA	0	0	0	0	0	0	0	0	0	0	0	0	1	0	0	1	1	0	14
tRNA-Val-GTY:tRNA:tRNA	0	0	0	0	0	0	0	0	0	1	0	0	0	0	0	1	1	0	14
UCON44:TcMar:DNA	0	0	0	0	0	0	0	0	0	0	0	1	0	0	0	1	1	0	14
RLTR13D3A1:ERVK:LTR	0	0	0	0	0	1	0	0	0	0	0	0	0	0	0	1	1	0	14
RLTR14_RN:ERV1:LTR	0	0	0	0	0	0	0	0	-1	0	1	0	0	0	0	2	1	1	13
Tigger12c:TcMar-Tigger:DNA	0	0	0	0	0	0	0	0	0	0	0	0	1	0	0	1	1	0	14
LTR33:ERVL:LTR	0	0	0	-1	0	1	0	0	-1	0	0	0	0	0	0	3	1	2	12
MLT1J2:ERVL-MaLR:LTR	0	0	0	0	0	1	0	0	0	0	0	0	0	0	0	1	1	0	14
tRNA-Ala-GCY:tRNA:tRNA	0	0	0	0	0	0	0	0	0	1	0	0	0	0	0	1	1	0	14
Charlie32a:hAT-Charlie:DNA	0	0	0	1	0	0	0	0	0	0	0	0	0	0	0	1	1	0	14
LTR53B:ERVL:LTR	0	0	0	0	0	0	0	0	0	0	0	0	1	0	0	1	1	0	14
L1M3e:L1:LINE	0	0	0	1	0	0	0	0	-1	0	0	0	0	0	0	2	1	1	13
MLT1J-int:ERVL-MaLR:LTR	0	0	0	0	0	0	0	0	0	0	0	0	0	0	1	1	1	0	14
RLTR51A_Mm:ERVK?:LTR	0	0	0	1	0	0	0	0	0	0	0	0	0	0	0	1	1	0	14
MER54A:ERVL:LTR	0	0	0	0	0	0	0	0	0	1	0	0	0	0	0	1	1	0	14
RLTR49:ERVK:LTR	0	0	0	0	0	1	0	0	0	0	0	0	0	0	0	1	1	0	14
LTRIS4:ERV1:LTR	0	0	0	1	0	0	0	0	0	0	0	0	0	0	0	1	1	0	14
Tigger17d:TcMar-Tigger:DNA	0	0	0	1	0	0	0	0	0	0	0	0	0	0	0	1	1	0	14
MMAR1:TcMar-Mariner:DNA	0	0	0	0	0	0	0	0	0	0	1	0	0	0	0	1	1	0	14
L1_Mus3:L1:LINE	-1	0	0	0	0	0	0	0	0	0	0	0	0	0	1	2	1	1	13
MLT1B-int:ERVL-MaLR:LTR	0	0	0	0	0	0	0	0	-1	0	1	0	0	0	0	2	1	1	13
MER76:ERVL:LTR	0	0	0	0	0	0	0	0	0	0	0	0	1	0	0	1	1	0	14
L1M4a2:L1:LINE	0	0	0	1	0	0	0	0	0	0	-1	0	0	0	0	2	1	1	13
RLTR20D:ERVK:LTR	0	0	0	0	0	0	0	0	1	0	0	0	0	0	0	1	1	0	14
MER89:ERV1:LTR	0	0	0	0	0	0	0	0	-1	1	0	0	0	0	0	2	1	1	13
MLTR31FA_MM:ERVK:LTR	0	0	0	0	0	0	0	0	-1	0	1	0	0	0	0	2	1	1	13
UCON26:hAT:DNA	0	0	0	1	0	0	0	0	0	0	0	0	0	0	0	1	1	0	14
MLT2B4:ERVL:LTR	0	0	0	0	0	1	0	0	0	0	0	0	0	0	0	1	1	0	14
LTR37B:ERV1:LTR	0	0	0	0	0	0	0	0	0	0	1	0	0	0	0	1	1	0	14
Charlie4z:hAT-Charlie:DNA	0	0	0	0	0	1	0	0	-1	0	0	0	0	0	0	2	1	1	13
MER121:hAT:DNA	0	0	0	0	0	1	0	0	0	0	0	0	0	0	0	1	1	0	14
L1MEj:L1:LINE	0	0	0	0	0	1	0	0	-1	0	0	0	0	0	0	2	1	1	13
Zaphod:hAT-Tip100:DNA	0	0	0	0	0	0	0	0	1	0	0	0	0	0	0	1	1	0	14
Arthur1:hAT-Tip100:DNA	0	0	0	1	0	0	0	0	-1	0	0	0	0	0	0	2	1	1	13
L1ME1:L1:LINE	0	0	0	0	0	1	0	0	-1	0	0	0	0	0	0	2	1	1	13
L1M4b:L1:LINE	0	0	0	0	0	0	0	0	1	0	0	0	0	0	0	1	1	0	14
RLTR13D5:ERVK:LTR	0	0	0	0	1	0	0	0	-1	0	0	0	0	0	0	2	1	1	13
tRNA-Tyr-TAC:tRNA:tRNA	0	0	0	0	0	0	0	0	0	1	0	0	0	0	0	1	1	0	14
MMERVK10D3_LTR:ERVK:LTR	0	0	0	0	0	0	0	0	0	0	0	0	0	1	0	1	1	0	14
RMER13A2:ERVK:LTR	0	0	0	0	0	0	0	0	0	0	1	0	0	0	0	1	1	0	14
MLT1C:ERVL-MaLR:LTR	0	0	0	0	0	1	0	0	-1	0	0	0	0	0	0	2	1	1	13
MER119:hAT-Charlie:DNA	0	0	0	0	0	0	0	0	1	0	0	0	0	0	0	1	1	0	14
MER102b:hAT-Charlie:DNA	-1	0	0	0	0	1	0	0	-1	0	0	0	0	0	0	3	1	2	12
MARNA:TcMar-Mariner:DNA	0	0	0	0	0	1	0	0	-1	0	0	0	0	0	0	2	1	1	13
L1MA5A:L1:LINE	0	0	0	0	1	0	0	0	0	0	0	0	0	0	0	1	1	0	14
RLTR35B_MM:ERVL:LTR	0	0	0	0	0	1	0	0	0	0	0	0	0	0	0	1	1	0	14
MER3:hAT-Charlie:DNA	0	0	0	0	0	0	0	0	0	0	1	0	0	0	0	1	1	0	14
RLTR13C2:ERVK:LTR	-1	0	0	0	1	0	0	0	0	0	0	0	0	0	0	2	1	1	13
LTR91A:LTR:LTR	0	0	0	0	0	0	0	0	0	1	0	0	0	0	0	1	1	0	14
Tigger1:TcMar-Tigger:DNA	0	0	0	0	0	0	0	0	-1	0	1	0	0	0	0	2	1	1	13
L1MA7:L1:LINE	0	0	0	0	0	1	0	0	-1	0	0	0	0	0	0	2	1	1	13
hAT-N1_Mam:hAT-Tip100?:DNA	0	0	0	0	0	1	0	0	0	0	0	0	0	0	0	1	1	0	14
LTR33B:ERVL:LTR	0	0	0	1	0	0	0	0	0	0	0	0	0	0	0	1	1	0	14
IMPB_01:Satellite:Satellite	0	0	0	0	0	0	0	0	0	0	0	0	0	0	1	1	1	0	14
ETnERV3-int:ERVK:LTR	-1	0	0	-1	0	0	0	0	-1	1	0	0	0	0	0	4	1	3	11
RMER16_Mm:ERVK:LTR	0	0	0	0	1	0	0	0	-1	0	0	0	0	0	0	2	1	1	13
Charlie12_Rodent:hAT-Charlie:DNA	0	0	0	0	0	0	0	0	0	0	1	0	0	0	0	1	1	0	14
LTR81B:Gypsy:LTR	0	0	0	0	0	0	0	0	-1	1	0	0	0	0	0	2	1	1	13
FordPrefect:hAT-Tip100:DNA	0	0	0	0	0	1	0	0	0	0	0	0	0	0	0	1	1	0	14
Tigger19b:TcMar-Tigger:DNA	0	0	0	0	0	0	0	0	0	0	1	0	0	0	0	1	1	0	14
RLTR12B:ERVK:LTR	0	0	0	0	0	1	0	0	-1	0	0	0	0	0	0	2	1	1	13
MLT1H-int:ERVL-MaLR:LTR	0	0	0	0	0	0	0	0	-1	1	0	0	0	0	0	2	1	1	13
RLTR31D_MM:ERVK:LTR	0	0	0	0	0	1	0	0	-1	0	0	0	0	0	0	2	1	1	13
Eutr11:DNA:DNA	0	0	0	0	0	0	0	0	0	0	0	1	0	0	0	1	1	0	14
tRNA-Cys-TGY:tRNA:tRNA	0	0	0	0	0	0	0	0	0	1	0	0	0	0	0	1	1	0	14
MMSAT4:Satellite:Satellite	-1	0	0	0	0	0	0	0	0	-1	0	0	0	-1	1	4	1	3	11
MER34-int:ERV1:LTR	0	0	0	0	0	0	0	0	0	1	0	0	0	0	0	1	1	0	14
LTR85c:Gypsy?:LTR	0	0	0	0	0	0	0	0	0	1	0	0	0	0	0	1	1	0	14
MER117:hAT-Charlie:DNA	0	0	0	-1	0	0	0	0	-1	0	1	0	0	0	0	3	1	2	12
MER91A:hAT-Tip100:DNA	0	0	0	0	0	0	0	0	-1	1	0	0	0	0	0	2	1	1	13
L1MA4:L1:LINE	0	0	0	0	0	1	0	0	0	0	0	0	0	0	0	1	1	0	14
Charlie5:hAT-Charlie:DNA	0	0	0	0	0	1	0	0	-1	0	0	0	0	0	0	2	1	1	13
RLTR20B3:ERVK:LTR	0	0	0	0	0	0	0	0	1	0	0	0	0	0	0	1	1	0	14
MLT2B3:ERVL:LTR	0	0	0	0	0	1	0	0	-1	0	0	0	0	0	0	2	1	1	13
RMER17A:ERVK:LTR	0	0	0	0	0	0	0	0	1	0	0	0	0	0	0	1	1	0	14
RLTR20C2_MM:ERVK:LTR	0	0	0	0	0	0	0	0	0	0	0	0	0	1	0	1	1	0	14
MER70-int:ERVL:LTR	1	0	0	0	0	0	0	0	0	0	0	0	0	0	0	1	1	0	14
LTR88b:Gypsy?:LTR	0	0	0	0	0	0	0	0	0	1	0	0	0	0	0	1	1	0	14
ORR1A0-int:ERVL-MaLR:LTR	-1	0	0	-1	0	0	0	0	-1	-1	-1	0	0	0	1	6	1	5	9
RLTR11C_MM:ERVK:LTR	0	0	0	0	0	1	0	0	-1	0	0	0	0	0	0	2	1	1	13
IAPLTR3:ERVK:LTR	0	0	-1	0	0	0	0	0	-1	0	0	1	0	-1	0	4	1	3	11
MERV1_I-int:ERV1:LTR	0	0	0	0	0	0	0	0	1	0	0	0	0	0	0	1	1	0	14
LTR84a:ERVL:LTR	0	0	0	1	0	0	0	0	0	0	0	0	0	0	0	1	1	0	14
Tigger15a:TcMar-Tigger:DNA	0	0	0	0	0	0	0	0	0	0	1	0	0	0	0	1	1	0	14
MLTR18_MM:ERVK:LTR	0	0	0	0	0	0	0	0	1	0	0	0	0	0	0	1	1	0	14
MamGypLTR2c:Gypsy:LTR	0	0	0	0	0	0	0	0	0	1	0	0	0	0	0	1	1	0	14
L1M8:L1:LINE	0	0	0	0	0	0	0	0	1	0	0	0	0	0	0	1	1	0	14
MER53:hAT:DNA	0	0	0	0	0	1	0	0	0	0	0	0	0	0	0	1	1	0	14
MLTR11A:ERVK:LTR	0	0	0	0	1	0	0	0	-1	0	0	0	0	0	0	2	1	1	13
ERVB4_3-LTR_MM:ERVK:LTR	0	0	0	0	0	0	0	0	0	1	0	0	0	0	0	1	1	0	14
MLT1G1-int:ERVL-MaLR:LTR	0	0	0	0	0	0	0	0	0	1	0	0	0	0	0	1	1	0	14
MER58B:hAT-Charlie:DNA	0	0	0	0	0	0	0	0	0	0	1	0	0	0	0	1	1	0	14
MamRep1151:LTR?:LTR?	0	0	0	0	0	0	0	0	-1	0	0	1	0	0	0	2	1	1	13
Charlie16a:hAT-Charlie:DNA	0	0	0	0	0	0	0	0	-1	0	1	0	0	0	0	2	1	1	13
MurSatRep1:Unknown:Unknown	-1	0	0	0	0	0	0	0	1	0	0	0	0	-1	0	3	1	2	12
RLTR20B1:ERVK:LTR	-1	0	0	0	0	0	0	0	0	0	0	0	0	1	0	2	1	1	13
MLT1O:ERVL-MaLR:LTR	0	0	0	0	0	0	0	0	-1	0	1	0	0	0	0	2	1	1	13
RLTR12C:ERVK:LTR	0	0	0	0	0	0	0	0	1	0	-1	0	0	0	0	2	1	1	13
MRLTR33:ERVK:LTR	0	0	0	0	1	0	0	0	0	0	0	0	0	0	0	1	1	0	14
RLTR22_Mus:ERVK:LTR	0	0	0	0	0	0	0	0	-1	0	1	0	0	0	0	2	1	1	13
Arthur1B:hAT-Tip100:DNA	0	0	0	0	0	0	0	0	0	1	0	0	0	0	0	1	1	0	14
ORR1G-int:ERVL-MaLR:LTR	0	0	0	0	0	0	0	0	0	0	0	1	0	0	0	1	1	0	14
OldhAT1:hAT-Ac:DNA	1	0	0	0	0	0	0	0	0	0	0	0	0	0	0	1	1	0	14
Tigger6a:TcMar-Tigger:DNA	0	0	0	0	0	1	0	0	0	0	0	0	0	0	0	1	1	0	14
RLTR46A:ERVK:LTR	0	0	0	0	0	0	0	0	0	1	0	0	0	0	0	1	1	0	14
Tigger19a:TcMar-Tigger:DNA	0	0	0	0	0	0	0	0	1	0	0	0	0	0	0	1	1	0	14
RLTR20A:ERVK:LTR	0	0	0	0	0	0	0	0	-1	0	0	1	0	0	0	2	1	1	13
ORR1D1-int:ERVL-MaLR:LTR	0	0	0	0	0	1	0	0	-1	0	0	0	0	0	0	2	1	1	13
MER91C:hAT-Tip100:DNA	0	0	0	0	0	0	0	0	0	0	0	1	0	0	0	1	1	0	14
Tigger12A:TcMar-Tigger:DNA	0	0	0	1	0	0	0	0	0	0	0	0	0	0	0	1	1	0	14
Tigger16b:TcMar-Tigger:DNA	0	0	0	0	0	0	0	0	0	0	0	0	0	1	0	1	1	0	14
LTR82B:ERVL:LTR	0	0	0	0	0	1	0	0	0	0	0	-1	0	0	0	2	1	1	13
ERVL-B4-int:ERVL:LTR	0	0	0	0	1	0	0	0	0	0	0	0	0	0	0	1	1	0	14
RLTR17:ERVK:LTR	0	0	0	0	0	1	0	0	0	0	0	0	0	0	0	1	1	0	14
Charlie9:hAT-Charlie:DNA	0	0	0	0	0	0	0	0	0	-1	1	0	0	0	0	2	1	1	13
ERVB7_3-LTR_MM:ERVK:LTR	-1	0	0	0	0	0	0	0	-1	1	0	0	0	0	0	3	1	2	12
L1MD1:L1:LINE	0	0	0	0	0	0	0	0	-1	0	1	0	0	0	0	2	1	1	13
MT2B:ERVL:LTR	0	0	0	0	0	1	0	0	-1	0	0	0	0	0	0	2	1	1	13
MER63D:hAT-Blackjack:DNA	0	0	0	0	0	0	0	0	-1	0	0	0	1	0	0	2	1	1	13
MYSERV-int:ERVK:LTR	0	0	0	0	0	1	0	0	0	0	0	0	0	0	0	1	1	0	14
LTR16B1:ERVL:LTR	0	0	0	0	0	0	0	0	1	0	0	0	0	0	0	1	1	0	14
ERVB7_4-LTR_MM:ERVK:LTR	0	0	0	0	1	0	0	0	0	0	0	0	0	0	0	1	1	0	14
X20_LINE:CR1:LINE	0	0	0	0	0	0	0	0	0	0	0	0	1	0	0	1	1	0	14
RLTR41:ERV1:LTR	0	0	0	0	0	1	0	0	-1	0	0	0	0	-1	0	3	1	2	12
X6a_DNA:TcMar-Tigger:DNA	0	0	0	1	0	0	0	0	0	0	0	0	0	0	0	1	1	0	14
RMER16B3:ERVK:LTR	1	0	0	0	0	0	0	0	-1	0	0	0	0	0	0	2	1	1	13
RMER16A2:ERVK:LTR	0	0	0	0	0	0	0	0	0	0	1	0	0	0	0	1	1	0	14
RLTR10B2:ERVK:LTR	0	0	0	0	0	1	0	0	-1	0	0	0	0	0	0	2	1	1	13
ORR1A0:ERVL-MaLR:LTR	0	0	0	0	0	1	0	0	0	0	0	0	0	0	0	1	1	0	14
MER67D:ERV1:LTR	0	0	0	0	0	0	0	0	0	0	0	0	1	0	0	1	1	0	14
MLT1F:ERVL-MaLR:LTR	0	0	0	0	1	0	0	0	-1	0	0	0	0	0	0	2	1	1	13
RMER16B:ERVK:LTR	1	0	0	0	0	0	0	0	0	0	0	0	0	0	0	1	1	0	14
RMER17A-int:ERVK:LTR	0	0	0	0	1	0	0	0	-1	0	0	0	0	0	0	2	1	1	13
MER34C:ERV1:LTR	0	0	0	1	0	0	0	0	-1	0	0	0	0	0	0	2	1	1	13
L1MA6:L1:LINE	0	0	0	0	0	1	0	0	0	0	0	0	0	0	0	1	1	0	14
MER90:ERV1:LTR	0	0	0	0	0	1	0	0	-1	0	0	0	0	0	0	2	1	1	13
ORR1A3:ERVL-MaLR:LTR	0	0	0	0	0	1	0	0	-1	0	0	0	0	0	0	2	1	1	13
MamGypsy2-I:Gypsy:LTR	0	0	0	0	0	1	0	0	0	0	0	0	0	0	0	1	1	0	14
L1M:L1:LINE	0	0	0	1	0	0	0	0	0	0	0	0	0	0	0	1	1	0	14
RLTR5_Mm:ERV1:LTR	0	0	0	1	0	0	0	0	-1	0	0	0	0	0	0	2	1	1	13
Lx5b:L1:LINE	0	0	0	0	0	0	0	0	-1	0	1	0	0	0	0	2	1	1	13
RMER17D2:ERVK:LTR	0	0	0	0	0	0	0	0	1	0	0	0	0	0	0	1	1	0	14
Charlie4a:hAT-Charlie:DNA	0	0	0	0	0	0	0	0	1	0	0	0	0	0	0	1	1	0	14
EUTREP2:Unknown:Unknown	0	0	0	0	0	0	0	0	1	0	0	0	0	0	0	1	1	0	14
MERVL-int:ERVL:LTR	0	0	0	0	0	0	0	0	-1	0	1	0	0	0	0	2	1	1	13
L1MEg2:L1:LINE	0	0	0	0	0	0	0	0	1	0	0	0	0	0	0	1	1	0	14
MER94:hAT-Blackjack:DNA	0	0	0	0	0	1	0	0	0	0	0	0	0	0	0	1	1	0	14
LTR40b:ERVL:LTR	0	0	0	1	0	0	0	0	-1	0	0	0	0	0	0	2	1	1	13
X7B_LINE:CR1:LINE	0	0	0	0	1	0	0	0	-1	0	0	0	0	0	0	2	1	1	13
MER31-int:ERV1:LTR	0	0	0	1	0	0	0	0	0	-1	0	0	0	0	0	2	1	1	13
UCON8:DNA:DNA	0	0	0	0	0	0	0	0	0	0	0	1	0	0	0	1	1	0	14
Helitron3Na_Mam:Helitron:RC	0	0	0	0	0	0	0	0	0	0	0	1	0	0	0	1	1	0	14
MER5C1:hAT-Charlie:DNA	0	0	0	0	0	0	0	0	1	0	0	0	0	0	0	1	1	0	14
RLTR43C:ERVK:LTR	0	0	0	0	0	0	0	0	-1	1	0	0	0	0	0	2	1	1	13
L4_B_Mam:RTE-X:LINE	0	0	0	1	0	0	0	0	-1	0	0	0	0	0	0	2	1	1	13
RLTR41C:ERV1:LTR	0	0	0	0	0	0	0	0	0	0	0	1	0	0	0	1	1	0	14
L2d:L2:LINE	0	0	0	0	0	1	0	0	0	0	0	0	0	0	0	1	1	0	14
LTR41C:ERVL:LTR	0	0	0	0	0	1	0	0	0	0	0	0	0	0	0	1	1	0	14
Eulor2B:DNA?:DNA?	0	0	0	1	0	0	0	0	0	0	0	0	0	0	0	1	1	0	14
MLT1F-int:ERVL-MaLR:LTR	0	0	0	0	0	0	0	0	0	0	0	0	1	0	0	1	1	0	14
RLTR48C:ERV1:LTR	0	0	0	0	0	0	0	0	0	0	0	1	0	0	0	1	1	0	14
LTR102_Mam:ERVL:LTR	0	0	0	1	0	0	0	0	0	0	0	0	0	0	0	1	1	0	14
RLTR46A2:ERVK:LTR	0	0	0	0	0	0	0	0	0	0	0	0	0	0	1	1	1	0	14
L4_A_Mam:RTE-X:LINE	0	0	0	1	0	0	0	0	0	0	0	0	0	0	0	1	1	0	14
HAL1ME:L1:LINE	0	0	0	0	0	1	0	0	-1	0	0	0	0	0	0	2	1	1	13
MamGypLTR1b:Gypsy:LTR	0	0	0	0	0	0	0	0	0	1	0	0	0	0	0	1	1	0	14
Eutr16:hAT-Tip100?:DNA?	0	0	0	0	0	0	0	0	0	0	0	-1	0	0	0	1	0	1	14
IAPLTR3-int:ERVK:LTR	0	0	0	-1	0	0	0	0	0	0	0	0	0	0	0	1	0	1	14
RLTR28B:ERVL:LTR	0	0	0	0	0	0	0	0	-1	0	0	0	0	0	0	1	0	1	14
MER133A:DNA?:DNA?	-1	0	0	0	0	0	0	0	0	0	0	0	0	0	0	1	0	1	14
MER63A:hAT-Blackjack:DNA	0	0	0	0	0	0	0	0	-1	0	0	0	0	0	0	1	0	1	14
Zaphod2:hAT-Tip100:DNA	0	0	0	0	0	0	0	0	0	-1	0	0	0	0	0	1	0	1	14
U2:snRNA:snRNA	0	0	0	0	0	0	0	0	0	-1	0	0	0	0	0	1	0	1	14
LTR81A:Gypsy:LTR	0	0	0	0	0	0	0	0	-1	0	0	0	0	0	0	1	0	1	14
MER92A:ERV1:LTR	0	0	0	0	0	0	0	0	0	-1	0	0	0	0	0	1	0	1	14
MER110:ERV1:LTR	0	0	0	0	0	0	0	0	-1	0	0	0	0	0	0	1	0	1	14
UCON64:Unknown:Unknown	0	0	0	-1	0	0	0	0	-1	0	0	0	0	0	0	2	0	2	13
Charlie10:hAT-Charlie:DNA	0	0	0	0	0	0	0	0	-1	0	0	0	0	0	0	1	0	1	14
AmnSINE1:5S-Deu-L2:SINE	-1	0	0	0	0	0	0	0	0	0	0	0	0	0	0	1	0	1	14
Charlie16:hAT-Charlie:DNA	-1	0	0	0	0	0	0	0	0	0	0	0	0	0	0	1	0	1	14
RMER6-int:ERVK:LTR	0	0	0	0	0	0	0	0	-1	0	0	0	0	0	0	1	0	1	14
MER74A:ERVL:LTR	0	0	0	0	0	0	0	0	-1	0	0	0	0	0	0	1	0	1	14
ERVB5_1-LTR_MM:ERVK:LTR	0	0	0	0	0	0	0	0	-1	0	0	0	0	0	0	1	0	1	14
MER31B:ERV1:LTR	0	0	0	0	0	0	0	0	-1	0	-1	0	0	0	0	2	0	2	13
Charlie23a:hAT-Charlie:DNA	0	0	0	0	0	0	0	0	-1	0	0	0	0	0	0	1	0	1	14
RLTR20C:ERVK:LTR	0	0	0	0	0	0	0	0	-1	0	0	0	0	0	0	1	0	1	14
MER130:DNA:DNA	0	0	0	0	0	0	0	0	0	0	0	-1	0	0	0	1	0	1	14
X2_LINE:CR1:LINE	0	0	0	0	0	0	0	0	0	-1	0	0	0	0	0	1	0	1	14
MER21-int:ERVL:LTR	0	0	0	0	0	0	0	0	-1	0	0	0	0	0	0	1	0	1	14
LTR50:ERVL:LTR	0	0	0	0	0	0	0	0	-1	0	0	0	0	0	0	1	0	1	14
MLT1H1:ERVL-MaLR:LTR	0	0	0	0	0	0	0	0	-1	0	0	0	0	-1	0	2	0	2	13
MamGypLTR1a:Gypsy:LTR	-1	0	0	0	0	0	0	0	-1	0	0	0	0	0	0	2	0	2	13
ORSL-2b:hAT-Tip100:DNA	-1	0	0	0	0	0	0	0	-1	0	0	0	0	0	0	2	0	2	13
L1ME4a:L1:LINE	0	0	0	-1	0	0	0	0	-1	0	0	0	0	0	0	2	0	2	13
MER4B-int:ERV1:LTR	0	0	0	0	0	0	0	0	0	0	0	-1	0	0	0	1	0	1	14
MER57-int:ERV1:LTR	0	0	0	0	0	0	0	0	-1	0	0	0	0	0	0	1	0	1	14
LTR16E2:ERVL:LTR	0	0	0	0	0	0	0	0	-1	0	0	0	0	0	0	1	0	1	14
MER112:hAT-Charlie:DNA	0	0	0	0	0	0	0	0	0	0	-1	0	0	0	0	1	0	1	14
MER68-int:ERVL:LTR	0	0	0	0	0	0	0	0	0	-1	0	0	0	0	0	1	0	1	14
MLT2B1:ERVL:LTR	-1	0	0	0	0	0	0	0	-1	0	0	0	0	0	0	2	0	2	13
MER65-int:ERV1:LTR	0	0	0	0	0	0	0	0	-1	0	0	0	0	0	0	1	0	1	14
MER97c:hAT-Tip100:DNA	-1	-1	0	0	0	0	0	0	0	0	0	0	0	0	0	2	0	2	13
Kanga1a:TcMar-Tc2:DNA	-1	0	0	0	0	0	0	0	0	0	0	0	0	0	0	1	0	1	14
MLT1I-int:ERVL-MaLR:LTR	0	0	0	0	0	0	0	0	-1	0	0	0	0	0	0	1	0	1	14
RLTR30D_MM:ERV1:LTR	0	0	0	0	0	0	0	0	-1	0	0	0	0	0	0	1	0	1	14
tRNA-Ala-GCG:tRNA:tRNA	0	0	0	0	0	0	0	0	-1	0	0	0	0	0	0	1	0	1	14
MamRep434:TcMar-Tigger:DNA	0	0	0	0	0	0	0	0	-1	0	0	0	0	0	0	1	0	1	14
LTR81AB:Gypsy:LTR	0	0	0	0	0	0	0	0	0	-1	0	0	0	0	0	1	0	1	14
MamRep564:Unknown:Unknown	0	0	0	-1	0	0	0	0	0	0	0	0	0	0	0	1	0	1	14
MER74B:ERVL:LTR	0	0	0	0	0	0	0	0	-1	0	0	0	0	0	0	1	0	1	14
MER68C:ERVL:LTR	-1	-1	0	0	0	0	0	0	0	0	0	0	0	0	0	2	0	2	13
Charlie21a:hAT-Charlie:DNA	-1	0	0	0	0	0	0	0	0	0	0	0	0	0	0	1	0	1	14
MTEb-int:ERVL-MaLR:LTR	0	0	0	0	0	0	0	0	-1	0	0	0	0	0	0	1	0	1	14
RLTR41B:ERV1:LTR	0	0	0	-1	0	0	0	0	0	0	0	0	0	0	0	1	0	1	14
MLTR31F_MM:ERVK:LTR	0	0	0	0	0	0	0	0	-1	0	0	0	0	0	0	1	0	1	14
MLT1J1:ERVL-MaLR:LTR	0	0	0	0	0	0	0	0	-1	0	0	0	0	0	0	1	0	1	14
MamTip2b:hAT-Tip100:DNA	0	0	0	-1	0	0	0	0	0	0	0	0	0	0	0	1	0	1	14
RLTR31A_Mm:ERVK:LTR	0	0	0	0	0	0	0	0	-1	0	0	0	0	0	0	1	0	1	14
RLTR12H:ERVK:LTR	0	0	0	0	0	0	0	0	-1	0	0	0	0	0	0	1	0	1	14
MamRTE1:RTE-BovB:LINE	0	0	0	-1	0	0	0	0	0	0	0	0	0	0	0	1	0	1	14
L1ME3F:L1:LINE	0	0	0	0	0	0	0	0	-1	0	0	0	0	0	0	1	0	1	14
LTR41:ERVL:LTR	0	0	0	0	0	0	0	0	-1	0	0	0	0	0	0	1	0	1	14
MLT1A-int:ERVL-MaLR:LTR	0	0	0	0	0	0	0	0	-1	0	0	0	0	0	0	1	0	1	14
RLTR1:ERV1:LTR	0	0	0	0	0	0	0	0	-1	0	0	0	0	0	0	1	0	1	14
MER34A1:ERV1:LTR	0	0	0	0	0	0	0	0	0	-1	0	0	0	0	0	1	0	1	14
MLTR18B_MM:ERVK:LTR	0	0	0	0	0	0	0	0	-1	0	0	0	0	0	0	1	0	1	14
Charlie8:hAT-Charlie:DNA	0	0	0	0	0	0	0	0	-1	0	0	0	0	0	0	1	0	1	14
MLT1M:ERVL-MaLR:LTR	0	0	0	0	0	0	0	0	-1	0	0	0	0	0	0	1	0	1	14
L1MCb:L1:LINE	0	0	0	0	0	0	0	0	-1	0	0	0	0	0	0	1	0	1	14
MER45C:hAT-Tip100:DNA	0	0	0	0	0	0	0	0	-1	0	0	0	0	0	0	1	0	1	14
MER45A:hAT-Tip100:DNA	0	0	0	0	0	0	0	0	-1	0	0	0	0	0	0	1	0	1	14
EUTREP8:LTR:LTR	-1	0	0	0	0	0	0	0	0	0	0	0	0	0	0	1	0	1	14
MER20B:hAT-Charlie:DNA	0	0	0	0	0	0	0	0	-1	0	0	0	0	0	0	1	0	1	14
LTR89:ERVL?:LTR	0	0	0	0	0	0	0	0	-1	0	0	0	0	0	0	1	0	1	14
MER131:DNA?:DNA?	-1	0	0	0	0	0	0	0	-1	0	0	0	0	0	0	2	0	2	13
RMER21A:ERV1:LTR	0	0	0	0	0	0	0	0	-1	0	0	0	0	0	0	1	0	1	14
RLTR8:ERVK:LTR	0	0	0	0	0	0	0	0	-1	0	0	0	0	0	0	1	0	1	14
RLTR44E:ERVK:LTR	0	0	0	0	0	0	0	0	-1	0	0	0	0	0	0	1	0	1	14
MLTR13:ERVK:LTR	0	0	0	0	0	0	0	0	0	0	0	-1	0	0	0	1	0	1	14
MamRep1879:hAT-Tip100?:DNA	0	0	0	0	0	0	0	0	-1	0	0	0	0	0	0	1	0	1	14
LTR52:ERVL:LTR	-1	0	0	0	0	0	0	0	-1	0	0	0	0	0	0	2	0	2	13
RLTR19A2:ERVK:LTR	0	0	0	0	0	0	0	0	-1	0	0	0	0	0	0	1	0	1	14
MURVY-int:ERV1:LTR	-1	0	0	0	0	0	0	0	-1	0	0	0	0	-1	0	3	0	3	12
RLTR26C_MM:ERVK:LTR	0	0	0	0	0	0	0	0	-1	0	0	0	0	0	0	1	0	1	14
MER92-int:ERV1:LTR	0	0	0	0	0	0	0	0	0	-1	0	0	0	0	0	1	0	1	14
RLTR13D:ERVK:LTR	-1	0	0	0	0	0	0	0	0	0	0	0	0	0	0	1	0	1	14
MER95:ERV1:LTR	0	0	0	0	0	0	0	0	0	0	0	-1	0	0	0	1	0	1	14
Tigger9a:TcMar-Tigger:DNA	0	0	0	0	0	0	0	0	-1	0	0	0	0	0	0	1	0	1	14
Helitron1Nb_Mam:Helitron:RC	0	0	0	0	0	0	0	0	-1	0	0	0	0	0	0	1	0	1	14
LTR73:ERV1:LTR	-1	0	0	0	0	0	0	0	0	0	0	0	0	0	0	1	0	1	14
ERVB2_1A-I_MM:ERVK:LTR	0	0	0	0	0	0	0	0	0	-1	0	0	0	0	0	1	0	1	14
HERVL40-int:ERVL:LTR	0	0	0	0	0	0	0	0	-1	0	0	0	0	0	0	1	0	1	14
Arthur1A:hAT-Tip100:DNA	0	0	0	0	0	0	0	0	-1	0	0	0	0	0	0	1	0	1	14
RLTR13E:ERVK:LTR	0	0	0	0	0	0	0	0	-1	0	0	0	0	0	0	1	0	1	14
UCON4:DNA:DNA	-1	0	0	0	0	0	0	0	0	0	-1	0	0	0	0	2	0	2	13
U1:snRNA:snRNA	0	0	0	0	0	0	0	0	0	-1	0	0	0	0	0	1	0	1	14
RLTR13G:ERVK:LTR	0	0	0	0	0	0	0	0	-1	0	0	0	0	0	0	1	0	1	14
MLT1G3:ERVL-MaLR:LTR	0	0	0	0	0	0	0	0	-1	0	0	0	0	0	0	1	0	1	14
Tigger10:TcMar-Tigger:DNA	0	0	0	0	0	0	0	0	-1	0	0	0	0	0	0	1	0	1	14
L1P5:L1:LINE	-1	0	0	0	0	0	0	0	0	0	0	0	0	0	0	1	0	1	14
Kanga1d:TcMar-Tc2:DNA	0	0	0	-1	0	0	0	0	0	0	0	0	0	0	0	1	0	1	14
U13:snRNA:snRNA	0	0	0	0	0	0	0	0	0	0	0	-1	0	0	0	1	0	1	14
MER102a:hAT-Charlie:DNA	0	0	0	0	0	0	0	0	-1	0	0	0	0	0	0	1	0	1	14
L1ME3E:L1:LINE	0	0	0	0	0	0	0	0	0	-1	0	0	0	0	0	1	0	1	14
Tigger13a:TcMar-Tigger:DNA	0	0	0	0	0	0	0	0	-1	0	0	0	0	0	0	1	0	1	14
MamRep488:hAT-Tip100:DNA	0	0	0	-1	0	0	0	0	0	0	0	0	0	0	0	1	0	1	14
MTE2a-int:ERVL-MaLR:LTR	0	0	0	0	0	0	0	0	-1	0	0	0	0	0	0	1	0	1	14
RLTR41A2:ERV1:LTR	0	0	0	0	0	0	0	0	-1	0	0	0	0	0	0	1	0	1	14
ORR1C2-int:ERVL-MaLR:LTR	0	0	0	0	0	0	0	0	-1	0	0	0	0	0	0	1	0	1	14
RLTR17B_Mm:ERVK:LTR	-1	0	0	0	0	0	0	0	-1	-1	-1	0	0	0	0	4	0	4	11
Kanga1c:TcMar-Tc2:DNA	0	0	0	0	0	0	0	0	-1	0	0	0	0	0	0	1	0	1	14
