# Supplementary material for: Virus-induced transposable element expression up-regulation in human and mouse host cells
Source: Life Sci Alliance. 2020 Jan 21;3(2):e201900536. doi: 10.26508/lsa.201900536 (PMC6977392; doi:10.26508/lsa.201900536)
Supplement: Supplementary file 6 [file LSA-2019-00536_TableS6.xlsx]

## Sheet: hg38.FC.repeats.FDR0.05
chrom	start	stop	class/family	subfamily	repID	DFV	EBOV-CD4Tcells	EBOV	EBOV_MDM	EBV	HCMV	HCV	HIV-act	HIV-rest	HPV	HRSV	HSV-1	IAV	KSHV-HUVEC	KSHV-MC116	MeV	ORFV	RESTV	RVFV	sendai	SINV	VZV	ZIKV	totDE	DEup	DEdown	notDE	Manual Annotation			Source	# upregulated repeats	% upregulated repeats		Source	# TE repeats	% upregulated TEs
9	32444664	32448809	LINE/L1	L1PA7	DF05199576	0	0	1	1	-1	1	0	0	0	0	1	1	1	0	0	1	1	0	1	1	1	0	1	13	12	1	10	IR or readthrough	1		Readthrough	37	33.6		Readthrough	35	0.397727
9	32455254	32455621	LTR/ERVL-MaLR	THE1D	DF05199589	0	0	1	1	1	0	0	0	0	0	1	0	1	0	0	1	1	0	1	1	1	0	0	10	10	0	13	readthrough	1		IR	20	18.2		IR	17	0.193182
1	78661492	78661959	LINE/L2	L2d2	DF00184065	0	0	1	1	1	0	0	0	0	0	0	1	0	0	0	1	1	0	1	1	0	0	1	9	9	0	14	IR	1		Intergenic	15	13.6		Intergenic	8	0.0909091
6	29946917	29948746	LTR/ERVL	ERV3-16A3_I-int	DF04308252	0	0	1	0	0	0	0	0	0	0	0	1	1	0	0	1	0	0	1	1	1	1	1	9	9	0	14	readthrough	1		IR through readthrough	12	10.9		IR through readthrough	6	0.0681818
4	139047217	139047506	SINE/Alu	AluSq2	DF03823303	0	0	1	0	0	-1	1	0	0	0	1	0	1	0	1	1	0	0	1	1	0	1	0	10	9	1	13	readthrough			IR or readthrough	21	19.1		IR or readthrough	17	0.193182
6	29948751	29950412	LTR/ERVL	ERV3-16A3_I-int	DF04308253	0	0	0	0	0	0	0	1	-1	0	0	1	1	0	0	1	0	0	1	1	1	1	1	10	9	1	13	readthrough	1		Intergenic or readthrough	5	4.5		Intergenic or readthrough	5	0.0568182
9	32431067	32431656	DNA/TcMar-Tigger	Tigger17a	DF05199555	0	0	0	1	0	0	0	0	0	0	0	1	1	0	0	1	0	0	1	1	1	0	1	8	8	0	15	IR or readthrough				110				88
1	78656888	78658765	LINE/L1	L1MC5	DF00184058	0	0	1	0	0	0	0	0	0	0	0	1	1	0	0	1	1	0	1	1	0	0	1	8	8	0	15	IR or readthrough	1
9	32508304	32514734	LINE/L1	L1PA7	DF05199716	0	0	1	1	0	0	0	0	0	0	1	0	1	0	0	0	0	0	1	1	1	0	1	8	8	0	15	readthrough	1
9	32437520	32439029	LINE/L1	HAL1	DF05199566	0	0	1	0	0	0	0	0	0	0	0	1	1	0	0	1	0	0	1	1	1	0	1	8	8	0	15	IR or readthrough	1
9	32443837	32444667	LINE/L1	L1PA7	DF05199575	0	0	1	1	0	0	0	0	0	0	0	1	0	0	0	1	0	0	1	1	1	0	1	8	8	0	15	IR or readthrough	1		1	upregulated during infection (FDR < 0.05)
8	23069937	23071352	LTR/ERV1	LTR12C	DF04908177	1	0	1	0	0	0	1	0	0	1	0	1	0	0	0	1	0	0	1	0	1	0	0	8	8	0	15	IR or readthrough	1		0	no change due to infection
17	43325134	43331647	LTR/ERVK	HERVK13-int	DF02071177	0	0	-1	0	0	1	0	1	0	0	0	1	1	0	0	0	0	0	1	1	1	0	1	9	8	1	14	intergenic	1		-1	downregulated during infection (FDR < 0.05)
4	139046013	139046150	SINE/Alu	AluJb	DF03823301	1	0	1	0	0	-1	1	0	0	0	0	0	0	0	0	1	0	0	1	1	0	1	1	9	8	1	14	readthrough
17	43339412	43345762	LTR/ERVK	HERVK13-int	DF02071189	0	0	-1	0	0	0	0	1	0	0	0	1	0	0	0	1	0	0	1	1	1	1	1	9	8	1	14	intergenic	1
13	51350627	51353092	LINE/L1	L1MB7	DF01334213	1	0	1	0	0	-1	1	0	0	0	0	1	0	0	0	0	0	0	1	1	1	0	1	9	8	1	14	readthrough	1
12	121017733	121018095	LTR/ERV1	MER65D	DF01239674	0	1	0	0	0	0	0	0	0	0	1	0	1	0	0	1	0	0	1	1	0	0	1	7	7	0	16	readthrough	1
12	112974719	112975754	LTR/ERVL	ERV3-16A3_I-int	DF01217221	0	0	0	1	1	0	0	0	0	0	0	1	1	0	0	1	0	0	1	0	1	0	0	7	7	0	16	readthrough	1
9	32432736	32433220	LTR/ERVL-MaLR	MLT1F1	DF05199557	0	0	0	0	0	0	0	0	0	0	0	1	1	0	0	1	0	0	1	1	1	0	1	7	7	0	16	IR or readthrough	1
7	135176994	135180548	LTR/ERV1	HERV3-int	DF04818728	0	0	0	0	0	0	0	0	0	0	0	1	1	0	0	1	0	0	1	1	1	0	1	7	7	0	16	intergenic	1
3	122732872	122739022	LINE/L1	L1PA4	DF03423907	0	0	0	0	0	0	0	0	0	0	0	1	1	0	0	1	0	0	1	1	1	0	1	7	7	0	16	intergenic or readthrough	1
9	93443523	93444028	LINE/L1	L1MEf	DF05294985	1	0	1	0	1	0	0	1	0	0	0	0	0	0	0	0	0	0	1	-1	0	1	1	8	7	1	15	readthrough	1
6	27158128	27158197	tRNA	tRNA-His-CAY	DF04302418	0	0	1	0	0	-1	0	0	0	1	0	0	1	1	0	0	0	0	1	1	1	0	0	8	7	1	15	NA
6	27230555	27230637	tRNA	tRNA-Leu-TTA	DF04302609	0	0	0	0	0	-1	0	0	0	0	1	1	1	1	0	0	0	0	1	1	1	0	0	8	7	1	15	NA
10	89406839	89412211	LTR/ERV1	HERV9N-int	DF00645794	0	0	0	1	-1	0	0	0	0	0	0	0	1	0	0	1	0	0	1	1	1	0	1	8	7	1	15	readthrough	1
6	28898110	28898411	SINE/Alu	AluY	DF04306331	0	0	0	0	1	-1	0	0	0	0	1	1	1	0	0	0	0	0	1	0	1	1	0	8	7	1	15	intergenic
1	155308057	155308366	SINE/Alu	AluSx3	DF00291001	0	0	0	1	0	-1	0	0	0	0	1	1	1	0	0	0	0	0	1	0	1	0	1	8	7	1	15	intergenic
3	122723240	122724289	LINE/L1	L1MC4	DF03423884	0	0	1	1	-1	0	0	0	0	0	0	0	1	0	0	1	0	0	1	1	0	0	1	8	7	1	15	IR	1
5	65487355	65491213	LTR/ERVL	HERVL-int	DF04022122	0	0	1	0	1	-1	0	1	0	1	0	0	0	0	0	0	1	0	1	-1	1	0	0	9	7	2	14	intergenic or readthrough	1
5	179821968	179822360	LINE/L1	L1MB8	DF04244428	1	0	1	0	-1	1	0	1	0	0	1	0	-1	0	0	1	0	0	-1	1	0	0	0	10	7	3	13	IR	1
19	48876222	48877217	LTR/ERVK	LTR13	DF02418663	0	0	1	0	0	0	0	0	0	0	0	1	1	0	0	0	0	0	1	1	1	0	0	6	6	0	17	readthrough	1
12	19700214	19706417	LINE/L1	L1PA15	DF01035868	0	0	1	0	0	0	0	0	0	0	0	1	0	0	0	0	0	0	1	1	1	0	1	6	6	0	17	readthrough	1
3	179003928	179011524	LINE/L1	L1MA2	DF03530686	0	0	1	0	0	1	0	0	0	0	0	1	0	0	0	0	0	0	1	1	0	0	1	6	6	0	17	readthrough	1
7	26166458	26166683	SINE/MIR	MIRb	DF04610425	0	0	0	0	0	0	0	0	0	0	0	1	1	0	0	0	0	0	1	1	1	0	1	6	6	0	17	IR or readthrough
7	26168427	26168847	LINE/L1	L1PB1	DF04610428	0	0	0	0	0	0	0	0	0	0	0	1	1	0	0	0	0	0	1	1	1	0	1	6	6	0	17	IR or readthrough	1
3	119424726	119426521	LINE/L1	L1MA7	DF03417365	0	0	0	0	0	0	0	0	0	0	0	1	1	0	0	0	0	0	1	1	1	0	1	6	6	0	17	readthrough	1
15	44720561	44721256	LTR/ERVL	MER21C	DF01666325	0	0	0	0	0	0	0	0	0	0	0	1	1	0	0	0	0	0	1	1	1	0	1	6	6	0	17	readthrough	1
2	152634455	152635621	DNA/TcMar-Mariner	HSMAR1	DF02733075	0	0	0	0	0	0	0	0	0	0	0	1	1	0	0	0	0	0	1	0	1	1	1	6	6	0	17	IR through readthrough
7	26170439	26170764	LINE/L1	L1ME3G	DF04610434	0	0	0	0	0	0	0	0	0	0	0	1	1	0	0	0	0	0	1	1	1	0	1	6	6	0	17	IR or readthrough	1
7	26170813	26171016	SINE/Alu	AluJr	DF04610435	0	0	0	0	0	0	0	0	0	0	0	1	1	0	0	0	0	0	1	1	1	0	1	6	6	0	17	IR or readthrough
17	43338416	43339411	LTR/ERVK	LTR13	DF02071188	0	0	0	0	1	0	0	1	0	0	0	1	0	0	0	0	0	0	0	1	1	1	0	6	6	0	17	intergenic	1
10	89394949	89395831	LTR/ERVL	MER54A	DF00645771	0	0	0	1	0	0	0	0	0	0	0	0	1	0	0	0	0	0	1	1	1	0	1	6	6	0	17	intergenic	1
22	36235799	36236413	LINE/L1	HAL1	DF03158501	0	0	1	1	0	1	0	0	0	0	0	0	0	0	0	1	0	0	0	1	0	0	1	6	6	0	17	IR	1
9	32433235	32433536	SINE/Alu	AluJr	DF05199558	0	0	0	0	0	0	0	0	0	0	0	1	1	0	0	1	0	0	0	1	1	0	1	6	6	0	17	IR or readthrough
7	26169218	26169594	LTR/ERVL	LTR16A	DF04610431	0	0	0	0	0	0	0	0	0	0	0	1	1	0	0	0	0	0	1	1	1	0	1	6	6	0	17	IR or readthrough	1
7	26179783	26180328	LTR/ERV1	LTR78	DF04610457	0	0	0	0	0	0	0	0	0	0	0	1	1	0	0	0	0	0	1	1	1	0	1	6	6	0	17	IR or readthrough	1
9	32519010	32520863	LTR/ERV1	LOR1-int	DF05199725	0	0	1	0	0	0	0	0	0	0	0	0	1	0	0	0	0	0	1	1	1	0	1	6	6	0	17	IR or readthrough	1
9	32516755	32518823	LTR/ERV1	LOR1-int	DF05199723	0	0	1	0	0	0	0	0	0	0	0	0	1	0	0	0	0	0	1	1	1	0	1	6	6	0	17	IR or readthrough	1
9	32523269	32524270	LINE/L2	L2c	DF05199729	0	0	1	0	0	0	0	0	0	0	0	0	1	0	0	0	0	0	1	1	1	0	1	6	6	0	17	IR or readthrough	1
12	105169498	105170149	DNA/TcMar-Tigger	MER44C	DF01196323	0	0	1	0	0	0	0	0	0	0	0	1	0	0	0	0	0	0	1	1	1	0	1	6	6	0	17	readthrough	1
17	12150118	12155536	LINE/L1	L1PA10	DF02007806	0	0	1	0	0	0	0	0	0	0	0	1	1	0	0	0	0	0	1	0	1	0	1	6	6	0	17	readthrough	1
7	135173812	135175957	LTR/ERV1	Harlequin-int	DF04818726	0	0	0	0	0	0	0	0	0	0	0	1	1	0	0	1	0	0	1	1	0	0	1	6	6	0	17	intergenic	1
9	120898667	120898907	SINE/MIR	MIR	DF05356447	0	0	0	1	1	0	0	0	0	0	0	0	0	0	0	0	0	1	1	1	0	0	1	6	6	0	17	intergenic
6	110904343	110910070	LINE/L1	L1PA5	DF04453864	0	0	1	0	0	0	0	0	0	0	0	1	1	0	0	0	0	0	1	0	1	0	1	6	6	0	17	readthrough	1
9	32521163	32522827	LTR/ERV1	LOR1-int	DF05199727	0	0	1	0	0	0	0	0	0	0	0	0	1	0	0	0	0	0	1	1	1	0	1	6	6	0	17	IR or readthrough	1
4	168351746	168354144	LINE/L1	L1PA14	DF03875774	0	0	1	0	0	0	0	0	0	0	0	1	1	0	0	0	0	0	1	0	1	0	1	6	6	0	17	readthrough	1
7	26172276	26173122	LINE/L1	L1MC4	DF04610442	0	0	0	0	0	0	0	0	0	0	0	1	1	0	0	0	0	0	1	1	1	0	1	6	6	0	17	IR or readthrough	1
17	35369582	35372621	LINE/L1	L1MA1	DF02052079	0	0	0	0	-1	1	0	1	0	0	0	0	0	0	1	0	1	0	0	1	1	0	0	7	6	1	16	IR	1
3	122709063	122710791	LINE/L1	L1PB2	DF03423858	0	0	1	1	-1	0	0	0	0	0	0	0	0	0	0	1	0	0	1	1	0	0	1	7	6	1	16	IR	1
6	116261356	116266157	LINE/L1	L1PA13	DF04463622	0	0	-1	0	0	0	0	0	0	0	0	1	1	0	0	0	0	0	1	1	1	0	1	7	6	1	16	IR	1
6	24676688	24682292	LTR/ERV1	HERV17-int	DF04297156	0	0	-1	0	0	1	0	0	0	0	0	1	1	0	0	0	0	0	1	1	1	0	0	7	6	1	16	IR	1
12	122868833	122869524	LINE/L1	L1ME3	DF01245186	0	0	1	0	-1	0	0	0	0	0	0	0	1	0	0	1	0	0	1	0	1	0	1	7	6	1	16	IR through readthrough	1
16	3152900	3152972	tRNA	tRNA-Arg-AGG	DF01793288	0	0	1	0	0	0	0	0	0	0	-1	1	1	0	0	0	0	0	1	1	1	0	0	7	6	1	16
8	53932185	53937060	LINE/L1	L1PA7	DF04964327	0	0	1	0	0	0	0	0	0	-1	0	1	1	0	0	0	0	0	1	0	1	0	1	7	6	1	16	IR through readthrough	1
5	133962238	133963313	LINE/L2	L2a	DF04143095	0	0	1	0	-1	1	1	0	0	0	0	0	0	0	0	0	0	0	1	1	0	0	1	7	6	1	16	IR	1
2	190961627	190962195	DNA/hAT-Charlie	Charlie30a	DF02799937	0	0	-1	1	0	0	0	0	0	0	0	1	1	0	0	0	0	0	0	1	1	0	1	7	6	1	16	IR through readthrough
6	28895824	28896121	SINE/Alu	AluY	DF04306326	0	0	0	0	0	-1	0	0	0	0	1	0	1	0	0	0	0	0	1	1	1	0	1	7	6	1	16	intergenic
1	155307897	155308048	SINE/Alu	AluSz6	DF00291000	0	0	0	1	0	-1	0	0	0	0	0	1	1	0	0	0	0	0	1	0	1	0	1	7	6	1	16	intergenic
2	162308782	162309273	LTR/ERVL-MaLR	MLT1A-int	DF02749513	0	0	0	1	0	0	0	-1	0	0	0	0	0	0	0	1	0	0	1	1	1	0	1	7	6	1	16	IR	1
5	115604301	115605777	LTR/ERVL	ERVL-E-int	DF04111117	0	0	1	0	0	-1	0	0	0	0	0	1	0	0	0	0	0	0	1	1	1	0	1	7	6	1	16	IR	1
3	122710843	122712074	LINE/L1	L1PB2	DF03423860	0	0	1	1	-1	1	0	0	0	0	0	0	0	0	0	1	0	0	0	1	0	0	1	7	6	1	16	IR	1
9	99209686	99212837	LINE/L1	L1M2	DF05307819	0	0	0	0	0	0	0	0	0	0	-1	1	1	0	0	0	0	0	1	1	1	0	1	7	6	1	16	readthrough	1
15	59125554	59131421	LINE/L1	L1PA7	DF01694789	0	0	1	0	-1	1	0	0	0	-1	0	1	0	0	0	0	0	0	1	1	1	0	0	8	6	2	15	readthrough	1
5	242655	245882	LTR/ERVK	HERVK9-int	DF03915088	0	0	0	0	-1	-1	0	1	0	0	0	1	0	0	0	0	0	0	1	1	1	0	1	8	6	2	15	IR	1
19	57302754	57303573	LINE/L1	L1M2a	DF02441329	1	0	1	0	0	1	1	0	0	-1	0	-1	0	0	0	1	0	0	0	1	0	0	0	8	6	2	15	readthrough	1
3	101692862	101698340	LTR/ERVK	HERVK-int	DF03386400	1	0	-1	0	-1	0	1	1	0	0	-1	0	0	0	0	0	1	0	1	1	0	0	0	9	6	3	14	intergenic or readthrough	1
21	41462575	41463994	LTR/ERVL-MaLR	THE1B-int	DF03098216	0	0	0	0	1	0	0	0	0	0	0	1	1	0	0	1	0	0	0	0	0	0	1	5	5	0	18	readthrough	1
5	43297559	43297862	SINE/Alu	AluSq2	DF03990175	0	0	1	0	0	1	0	0	0	1	0	0	0	0	0	1	0	0	0	0	1	0	0	5	5	0	18	IR
12	19563304	19565281	LINE/L1	L1PREC2	DF01035574	0	0	1	0	0	0	0	0	0	0	0	1	0	0	0	0	0	0	1	1	0	0	1	5	5	0	18	intergenic or readthrough	1		Intergenic or IR	0	0
12	19566570	19569156	LINE/L1	L1PA4	DF01035578	0	0	1	0	0	0	0	0	0	0	0	1	0	0	0	0	0	0	1	1	1	0	0	5	5	0	18	intergenic or readthrough	1		Intergenic or readthrough	5	0.0568182
12	121018155	121018523	LTR/ERV1	MER48	DF01239676	0	0	0	1	0	0	0	0	0	0	0	0	1	0	0	0	0	0	1	1	1	0	0	5	5	0	18	readthrough	1		IR	17	0.193182
1	100199602	100206087	LINE/L1	L1PA7	DF00224079	0	0	0	0	0	1	0	0	0	0	0	1	0	0	0	0	0	0	1	1	1	0	0	5	5	0	18	IR	1		Intergenic	8	0.0909091
4	168934985	168941046	LINE/L1	L1PA7	DF03876846	0	0	0	0	0	0	0	0	0	0	0	1	1	0	0	0	0	0	1	1	1	0	0	5	5	0	18	readthrough	1		readthrough	35	0.397727
7	26163647	26165879	LINE/L1	L1PA5	DF04610421	0	0	0	0	0	0	0	0	0	0	0	1	0	0	0	0	0	0	1	1	1	0	1	5	5	0	18	IR through readthrough	1		IR through readthrough	6	0.0681818
7	26166310	26166457	LTR/ERVL	LTR33	DF04610424	0	0	0	0	0	0	0	0	0	0	0	1	1	0	0	0	0	0	1	0	1	0	1	5	5	0	18	IR through readthrough	1		IR or readthrough	17	0.193182
7	26168870	26169030	SINE/MIR	MIR	DF04610429	0	0	0	0	0	0	0	0	0	0	0	1	1	0	0	0	0	0	1	0	1	0	1	5	5	0	18	IR through readthrough					0.636364
2	101935382	101940622	LINE/L1	L1PA10	DF02639043	0	0	0	0	0	0	0	0	0	0	0	1	0	0	0	0	0	0	1	1	1	0	1	5	5	0	18	readthrough	1		total	88
16	50765091	50767446	DNA/TcMar-Tigger	Tigger1	DF01888367	0	0	1	0	0	0	0	0	0	0	0	1	0	0	0	0	0	0	1	1	0	0	1	5	5	0	18	IR
7	26159189	26159540	LINE/L2	L2c	DF04610405	0	0	0	0	0	0	0	0	0	0	0	1	0	0	0	0	0	0	1	1	1	0	1	5	5	0	18	IR or readthrough	1
7	152122776	152124358	LINE/L1	L1MC1	DF04852685	0	0	1	0	0	0	0	0	0	0	0	1	0	0	0	0	0	0	1	1	0	0	1	5	5	0	18	readthrough	1
19	44197548	44198422	LINE/L1	L1ME3A	DF02404235	1	0	0	0	0	0	0	0	0	0	0	1	0	0	0	1	0	0	1	0	1	0	0	5	5	0	18	readthrough	1
5	132397849	132403147	LINE/L1	L1PA6	DF04140039	0	0	0	0	0	0	0	0	0	0	0	1	1	0	0	0	0	0	1	1	1	0	0	5	5	0	18	readthrough	1
14	69811879	69814583	LTR/ERVK	HERVK3-int	DF01538248	0	0	0	0	0	0	0	0	0	0	0	1	1	0	0	0	0	0	1	0	1	0	1	5	5	0	18	readthrough	1
9	32502545	32503036	LTR/ERVL-MaLR	MLT1C2	DF05199702	0	0	0	0	0	0	0	0	0	0	0	0	1	0	0	0	0	0	1	1	1	0	1	5	5	0	18	IR or readthrough	1
21	41447034	41447417	LTR/ERVL-MaLR	MLT1B	DF03098179	0	0	0	1	0	0	0	0	0	0	0	1	1	0	0	1	0	0	0	0	0	0	1	5	5	0	18	IR	1
12	19559450	19560382	LINE/L1	L1MEg	DF01035567	0	0	1	0	0	0	0	0	0	0	0	1	0	0	0	0	0	0	1	1	0	0	1	5	5	0	18	readthrough	1
17	43353330	43354953	LTR/ERV1	PRIMA41-int	DF02071201	0	0	0	0	0	0	0	1	0	0	0	1	0	0	0	0	0	0	0	1	1	0	1	5	5	0	18	intergenic	1
6	134957119	134957870	LINE/L1	L1MC3	DF04496228	1	0	0	0	0	0	0	0	0	0	0	1	0	0	0	0	0	0	1	0	1	0	1	5	5	0	18	readthrough	1
10	89343050	89343656	LTR/ERV1	MER39	DF00645650	0	0	0	0	0	0	0	0	0	0	0	0	1	0	0	0	0	0	1	1	1	0	1	5	5	0	18	readthrough	1
7	26170033	26170133	DNA/hAT-Blackjack	MER94	DF04610433	0	0	0	0	0	0	0	0	0	0	0	1	0	0	0	0	0	0	1	1	1	0	1	5	5	0	18	IR through readthrough
7	26171036	26171263	LINE/L1	L1ME4b	DF04610436	0	0	0	0	0	0	0	0	0	0	0	1	0	0	0	0	0	0	1	1	1	0	1	5	5	0	18	IR through readthrough	1
7	26171264	26171564	SINE/Alu	AluSq2	DF04610437	0	0	0	0	0	0	0	0	0	0	0	1	1	0	0	0	0	0	1	1	1	0	0	5	5	0	18	IR through readthrough
X	84453142	84457132	LINE/L1	L1MA3	DF05747997	0	0	0	0	0	1	0	0	0	0	0	1	1	0	0	0	0	0	1	0	0	0	1	5	5	0	18	IR	1
6	27147801	27148123	SINE/Alu	AluSx	DF04302386	0	0	0	0	0	0	0	0	0	0	1	1	1	0	0	0	0	0	1	0	1	0	0	5	5	0	18	intergenic
7	105082288	105084346	DNA/TcMar-Tigger	Tigger2	DF04763005	0	0	0	0	0	1	0	0	0	0	0	1	0	0	0	0	0	0	1	1	1	0	0	5	5	0	18	IR
12	19676869	19682204	LINE/L1	L1PB1	DF01035827	0	0	1	0	0	0	0	0	0	0	0	1	0	0	0	0	0	0	1	1	0	0	1	5	5	0	18	readthrough	1
8	23036854	23038769	LTR/ERVL	ERVL-B4-int	DF04908102	0	0	1	0	0	1	0	0	0	0	0	0	0	0	0	0	0	0	1	1	0	0	1	5	5	0	18	IR	1
5	76739265	76739556	SINE/Alu	AluSq2	DF04044707	0	0	0	0	0	0	0	0	0	0	1	1	1	0	0	0	0	0	1	0	1	0	0	5	5	0	18	intergenic
7	26181464	26182341	LINE/L1	L1MEd	DF04610461	0	0	0	0	0	0	0	0	0	0	0	1	1	0	0	0	0	0	1	1	0	0	1	5	5	0	18	IR through readthrough	1
7	26180967	26181276	SINE/Alu	AluJb	DF04610460	0	0	0	0	0	0	0	0	0	0	0	1	0	0	0	0	0	0	1	1	1	0	1	5	5	0	18	IR through readthrough
1	186527899	186532657	LINE/L1	L1PA11	DF00352932	0	0	0	0	0	0	0	0	0	1	0	1	0	0	0	0	0	0	1	0	1	0	1	5	5	0	18	readthrough	1
3	178983377	178985961	LINE/L1	L1PA7	DF03530634	0	0	1	0	0	0	0	0	0	0	0	1	0	0	0	0	0	0	1	0	1	0	1	5	5	0	18	readthrough	1
1	100036738	100037247	LTR/ERVL-MaLR	MLT1F1	DF00223707	0	0	0	0	0	0	0	0	0	0	1	0	1	0	0	0	0	0	1	1	0	0	1	5	5	0	18	intergenic	1
10	89414047	89414243	LINE/L1	L1ME3G	DF00645804	0	0	0	0	0	0	0	0	0	0	0	0	1	0	0	1	0	0	1	1	0	0	1	5	5	0	18
15	75971803	75977773	LINE/L1	L1PA10	DF01733301	0	0	0	0	0	0	0	0	0	0	0	1	1	0	0	0	0	0	1	1	1	0	0	5	5	0	18
8	23059812	23061011	LINE/L1	L1MB3	DF04908153	0	0	1	0	0	0	0	0	0	0	0	1	1	0	0	0	0	0	1	0	0	0	1	5	5	0	18
8	81653356	81654834	LINE/L1	L1M5	DF05015258	0	0	1	0	0	0	0	0	0	0	0	1	0	0	0	0	0	0	1	0	1	0	1	5	5	0	18
6	85670038	85670574	LINE/L2	L2a	DF04408746	0	0	0	0	0	0	0	0	0	0	0	1	1	0	0	0	0	0	0	1	1	0	1	5	5	0	18
17	49569711	49570014	SINE/Alu	AluSx	DF02086997	0	0	0	0	0	0	0	0	0	0	1	1	1	0	0	0	0	0	1	0	1	0	0	5	5	0	18
2	190973246	190973493	SINE/MIR	MIR	DF02799950	0	0	0	1	0	0	0	1	0	0	0	1	0	0	0	0	0	0	0	1	0	0	1	5	5	0	18
17	35876302	35876711	LINE/L2	L2c	DF02053172	0	0	0	0	0	0	0	0	0	0	0	0	1	0	0	0	0	0	1	1	1	0	1	5	5	0	18
17	35876729	35877067	LINE/L2	L2c	DF02053173	0	0	0	0	0	0	0	0	0	0	0	0	1	0	0	0	0	0	1	1	1	0	1	5	5	0	18
17	35876027	35876262	SINE/MIR	MIR	DF02053171	0	0	0	0	0	0	0	0	0	0	0	0	1	0	0	0	0	0	1	1	1	0	1	5	5	0	18
1	150632874	150634662	LTR/ERVK	HERVK-int	DF00280458	0	0	0	0	0	1	1	0	0	0	0	0	0	0	0	0	0	0	1	1	0	0	1	5	5	0	18
12	19571074	19574094	LINE/L1	L1PREC2	DF01035583	0	0	1	0	0	0	0	0	0	0	0	1	0	0	0	0	0	0	1	1	0	0	1	5	5	0	18
21	41448138	41448515	DNA/TcMar-Tigger	Tigger22N1	DF03098183	0	0	0	1	1	0	0	0	0	0	0	1	1	0	0	1	0	0	0	0	0	0	0	5	5	0	18
21	41447418	41447732	LINE/L1	L1MB7	DF03098180	0	0	0	1	0	0	0	0	0	0	0	1	1	0	0	1	0	0	0	0	0	0	1	5	5	0	18
17	32428864	32430463	LTR/ERVL-MaLR	MSTA-int	DF02045209	0	0	0	0	0	0	0	0	0	0	0	1	1	0	0	0	0	0	1	0	1	0	1	5	5	0	18
11	85586017	85589925	LINE/L1	L1PB1	DF00901188	0	0	0	0	0	0	0	0	0	0	0	1	0	0	0	0	0	0	1	1	1	0	1	5	5	0	18
3	41251343	41254599	LINE/L1	L1MEf	DF03276803	0	0	0	0	0	0	0	0	0	0	0	1	1	0	0	0	0	0	1	0	1	0	1	5	5	0	18
1	150654651	150659225	LTR/ERVK	HERVK9-int	DF00280527	0	0	0	0	0	0	0	0	0	0	0	0	0	0	0	1	0	0	1	1	1	0	1	5	5	0	18
7	135180558	135181466	LTR/ERV1	HERV15-int	DF04818729	0	0	0	0	1	0	0	0	0	0	0	0	1	0	0	1	0	0	0	1	0	0	1	5	5	0	18
17	7487403	7488005	LINE/L2	L2a	DF01996597	0	0	1	0	0	0	0	1	0	0	0	1	0	0	0	0	0	0	0	0	1	0	1	5	5	0	18
2	190972067	190972295	SINE/MIR	MIRb	DF02799946	0	0	0	1	0	0	0	1	0	0	0	1	0	0	0	0	0	0	0	1	0	0	1	5	5	0	18
5	72926778	72933078	LTR/ERV1	HERV9-int	DF04037308	0	0	0	0	0	0	0	0	0	0	0	1	1	0	0	0	0	0	1	0	1	0	1	5	5	0	18
2	175064824	175069850	LINE/L1	L1MA2	DF02773323	0	0	1	0	0	1	0	0	0	0	0	1	0	0	0	0	0	0	0	1	0	0	1	5	5	0	18
9	32524872	32525345	LTR/ERVK	LTR3A	DF05199731	0	0	0	0	0	0	0	0	0	0	0	0	1	0	0	0	0	0	1	1	1	0	1	5	5	0	18
1	204506527	204506600	tRNA	tRNA-Lys-AAA	DF00385940	0	0	0	0	0	1	0	0	0	1	0	0	0	0	0	0	0	0	1	1	1	0	0	5	5	0	18
3	37425357	37431516	LINE/L1	L1PA6	DF03269177	0	0	1	0	0	0	0	0	0	0	0	1	0	0	0	0	0	0	1	0	1	0	1	5	5	0	18
2	216508222	216508663	LTR/ERVL-MaLR	MLT1H	DF02883699	0	0	0	0	0	0	0	0	0	0	0	1	1	0	0	0	0	0	1	0	1	0	1	5	5	0	18
2	216506576	216506887	LTR/ERVL	LTR101_Mam	DF02883693	0	0	0	0	0	0	0	0	0	0	0	1	1	0	0	0	0	0	1	0	1	0	1	5	5	0	18
10	89309782	89310316	LTR/Gypsy?	LTR88b	DF00645592	0	0	0	0	0	0	0	0	0	0	0	0	1	0	0	0	0	0	1	1	1	0	1	5	5	0	18
4	88497159	88498563	LTR/ERVL-MaLR	MLT1A0-int	DF03738238	0	0	0	1	0	0	0	0	0	0	0	1	0	0	0	0	0	0	1	1	0	0	1	5	5	0	18
6	75245574	75246587	LINE/L2	L2a	DF04391417	0	0	1	0	0	1	0	0	0	0	0	1	0	0	0	0	0	0	0	0	1	0	1	5	5	0	18
1	204394861	204396222	LINE/L1	L1MD3	DF00385706	0	0	1	0	0	0	0	0	0	0	1	1	0	0	0	0	0	0	0	1	0	0	1	5	5	0	18
2	162309297	162309595	LTR/ERVL-MaLR	MLT1A-int	DF02749514	0	0	0	1	0	0	0	0	0	0	0	0	1	0	0	1	0	0	0	1	0	0	1	5	5	0	18
17	7505012	7505829	LINE/L1	L1M4	DF01996632	0	0	1	0	0	0	0	1	0	0	0	1	0	0	0	0	0	0	0	0	1	0	1	5	5	0	18
7	54746032	54747056	LINE/L2	L2	DF04664598	1	0	1	0	0	0	0	0	0	0	0	1	1	0	0	0	0	0	0	0	1	0	0	5	5	0	18
2	191012749	191013125	LINE/L2	L2b	DF02800005	0	0	0	1	0	1	0	1	0	0	0	0	0	0	0	0	0	0	0	1	0	0	1	5	5	0	18
4	108643988	108647247	LTR/ERVL	ERVL-E-int	DF03772175	0	0	0	0	0	0	0	0	0	0	0	1	1	0	0	0	0	0	1	0	1	0	1	5	5	0	18
1	78662144	78662349	SINE/MIR	MIR	DF00184067	0	0	0	0	1	0	0	0	0	0	0	0	0	0	0	1	1	0	1	1	0	0	0	5	5	0	18
1	1017170	1018876	LTR/ERV1	LTR12C	DF00001722	0	0	0	0	0	0	0	0	0	0	0	1	1	0	0	0	0	0	1	1	1	0	0	5	5	0	18
9	32440813	32440962	DNA/hAT-Charlie	Charlie4z	DF05199568	0	0	0	0	0	0	0	0	0	0	0	1	0	0	0	0	0	0	1	1	1	0	1	5	5	0	18
9	32435554	32435952	LINE/RTE-X	L4_A_Mam	DF05199562	0	0	0	0	0	0	0	0	0	0	0	1	0	0	0	0	0	0	1	1	1	0	1	5	5	0	18
9	32436805	32437030	SINE/MIR	MIRb	DF05199564	0	0	0	0	0	0	0	0	0	0	0	1	0	0	0	0	0	0	1	1	1	0	1	5	5	0	18
7	141842616	141847857	LTR/ERVL	LTR57-int	DF04833461	0	0	0	0	0	0	0	0	0	0	0	1	1	0	0	0	0	0	1	0	1	0	1	5	5	0	18
6	2902512	2902817	SINE/Alu	AluSg	DF04252987	0	0	0	0	1	0	0	0	0	0	0	0	1	0	0	0	0	0	1	1	1	0	0	5	5	0	18
7	26188946	26189142	LTR/ERVL-MaLR	MLT1F	DF04610472	0	0	0	0	0	0	0	1	0	0	0	1	0	0	0	0	0	0	1	1	0	0	1	5	5	0	18
3	150507482	150512036	LINE/L1	L1MA5	DF03479252	0	0	0	0	0	0	0	0	0	0	0	1	1	0	0	0	0	0	1	0	1	0	1	5	5	0	18
10	101812262	101812409	SINE/Alu	AluSg	DF00673346	0	0	1	0	0	1	0	1	0	0	0	0	0	0	0	0	0	0	1	0	1	0	0	5	5	0	18
3	146522265	146523231	LTR/ERVK	LTR5_Hs	DF03472067	0	0	1	1	0	1	0	0	0	0	0	1	0	0	0	0	0	0	0	0	1	0	0	5	5	0	18
11	33109713	33110556	LINE/L1	L1MEj	DF00797610	0	0	0	0	0	0	0	0	0	0	0	1	0	0	0	0	0	0	1	1	1	0	1	5	5	0	18
1	161115062	161115363	SINE/Alu	AluSq2	DF00302816	0	0	0	0	0	0	0	0	0	0	1	1	1	0	0	0	0	0	1	0	1	0	0	5	5	0	18
12	10685907	10687212	LTR/ERVL	ERVL-B4-int	DF01018761	0	0	0	0	0	0	0	0	0	0	0	1	1	0	0	0	0	0	1	0	1	0	1	5	5	0	18
12	10688197	10690811	LTR/ERVL	ERVL-B4-int	DF01018767	0	0	0	0	0	0	0	0	0	0	0	1	1	0	0	0	0	0	1	0	1	0	1	5	5	0	18
6	8403981	8409396	LTR/ERVL	HERVL-int	DF04264209	0	0	0	0	0	0	0	0	0	0	0	1	1	0	0	0	0	0	1	0	1	0	1	5	5	0	18
15	55305210	55311846	LTR/ERV1	HERV17-int	DF01686714	0	0	0	0	0	1	0	0	0	0	0	0	0	0	0	0	0	0	1	1	1	0	1	5	5	0	18
1	78632965	78634986	LINE/L1	L1M1	DF00184020	0	0	1	1	0	0	0	0	0	0	0	1	0	0	0	1	0	0	0	1	0	0	0	5	5	0	18
12	19582586	19584204	LTR/ERVL-MaLR	THE1D-int	DF01035609	0	0	1	0	0	0	0	0	0	0	0	1	0	0	0	0	0	0	1	1	0	0	1	5	5	0	18
9	32443089	32443192	LINE/L2	L2c	DF05199574	0	0	0	0	0	0	0	0	0	0	1	0	0	0	0	1	0	0	1	1	1	0	0	5	5	0	18
14	69783204	69784883	LINE/L2	L2c	DF01538187	0	0	0	0	0	0	0	0	0	0	0	1	1	0	0	0	0	0	1	0	1	0	1	5	5	0	18
15	65681867	65683204	DNA/TcMar-Tigger	Tigger1	DF01709338	0	0	0	0	1	-1	0	0	0	0	0	1	0	0	0	0	0	0	0	1	1	0	1	6	5	1	17
6	27791357	27791427	tRNA	tRNA-Gln-CAA	DF04304036	0	0	1	0	0	-1	0	0	0	0	0	0	1	0	1	0	0	0	0	1	1	0	0	6	5	1	17
17	46107252	46108661	LINE/L2	L2a	DF02078467	0	0	1	0	0	0	0	0	0	-1	0	1	0	0	0	0	0	0	1	1	1	0	0	6	5	1	17
5	122049932	122053725	LINE/L1	L1PA15	DF04122035	0	0	1	0	0	-1	0	0	0	0	0	1	0	0	0	0	0	0	1	0	1	0	1	6	5	1	17
X	54611725	54614941	LINE/L1	L1PB1	DF05706754	1	0	1	0	-1	0	0	0	0	0	0	1	0	0	0	0	0	0	1	0	0	0	1	6	5	1	17
X	74071990	74078513	LINE/L1	L1PA8	DF05732819	0	0	0	0	-1	1	0	0	0	0	0	0	0	0	0	0	0	0	1	1	1	0	1	6	5	1	17
6	28305809	28312280	LINE/L1	L1PB1	DF04305060	0	0	0	0	0	-1	0	0	0	0	0	1	1	0	0	1	0	0	1	0	1	0	0	6	5	1	17
3	121962272	121967376	LINE/L1	L1PA12	DF03422241	0	0	0	0	-1	0	0	0	0	0	0	1	0	0	0	0	0	0	1	1	1	0	1	6	5	1	17
5	181207755	181207830	tRNA	tRNA-Lys-AAG	DF04247496	0	0	1	0	0	-1	0	0	0	0	0	0	1	0	0	0	0	0	1	1	1	0	0	6	5	1	17
5	14454755	14455569	LTR/ERV1	LTR12D	DF03937374	0	0	1	0	0	1	0	0	0	-1	0	0	0	0	0	0	0	0	1	0	1	0	1	6	5	1	17
12	62609122	62610076	LINE/L1	L1MC5a	DF01112090	0	0	0	0	0	0	0	0	0	0	-1	1	0	0	0	0	0	0	1	1	1	0	1	6	5	1	17
12	112980118	112983219	LINE/L1	L1MA4A	DF01217238	0	0	0	0	0	0	0	-1	0	0	0	1	1	0	0	0	0	0	1	1	0	0	1	6	5	1	17
5	115608463	115610902	LINE/L1	L1ME3B	DF04111122	1	0	1	0	-1	0	0	0	0	0	0	0	0	0	0	0	0	0	1	1	0	0	1	6	5	1	17
15	88634948	88635968	DNA/TcMar-Tigger	Tigger2b_Pri	DF01760225	0	0	1	0	-1	0	0	0	0	0	0	0	0	0	0	0	0	0	1	1	1	0	1	6	5	1	17
1	41164744	41167726	LINE/L1	L1MA6	DF00101102	0	0	1	0	0	1	1	0	0	0	0	-1	0	0	0	0	0	0	0	1	0	0	1	6	5	1	17
6	26305489	26305570	tRNA	tRNA-Ser-AGY	DF04300574	0	0	0	0	0	-1	0	0	0	1	0	0	1	0	0	0	0	0	1	1	1	0	0	6	5	1	17
5	40775546	40776522	LINE/L2	L2a	DF03985512	1	0	1	0	-1	1	0	0	0	0	0	0	0	0	0	0	0	0	1	1	0	0	0	6	5	1	17
2	195760052	195766167	LINE/L1	L1MA3	DF02807940	0	0	1	0	-1	0	0	0	0	0	0	1	1	0	0	0	0	0	1	0	1	0	0	6	5	1	17
7	26187555	26187801	DNA/TcMar-Tigger	MER2	DF04610471	0	0	0	0	0	-1	0	0	0	0	0	1	0	0	0	0	0	0	1	1	1	0	1	6	5	1	17
17	64493784	64494891	LINE/L1	L1MC4	DF02120680	0	0	0	0	0	0	0	0	0	0	0	1	1	0	0	0	0	0	1	-1	1	0	1	6	5	1	17
14	20633006	20633078	tRNA	tRNA-Pro-CCA	DF01445569	0	0	0	0	0	-1	0	0	0	0	0	1	1	0	0	0	0	0	1	1	1	0	0	6	5	1	17
19	57303917	57304213	SINE/Alu	AluSq2	DF02441331	1	0	1	0	1	1	0	0	0	0	0	-1	0	0	0	1	0	0	0	0	0	0	0	6	5	1	17
16	72064779	72072012	LTR/ERV1	HERVI-int	DF01935977	0	0	0	0	0	1	-1	0	0	0	0	1	1	0	0	0	0	0	1	0	1	0	0	6	5	1	17
6	27688188	27688261	tRNA	tRNA-Ile-ATT	DF04303755	0	0	1	0	0	-1	0	0	0	0	0	1	0	0	0	0	0	0	1	1	1	0	0	6	5	1	17
7	135175955	135176995	LTR/ERV1	HERV3-int	DF04818727	0	0	0	0	-1	0	0	0	0	0	0	0	1	0	0	1	0	0	1	1	0	0	1	6	5	1	17
1	32931104	32932018	LTR/ERVL	ERVL-E-int	DF00080184	0	0	1	0	-1	0	0	0	0	0	0	1	1	0	0	1	0	0	0	0	0	0	1	6	5	1	17
3	132662915	132664498	LINE/L1	L1M6	DF03444776	1	0	1	0	-1	1	1	0	0	0	0	0	0	0	0	0	0	0	0	1	0	0	0	6	5	1	17
5	140726266	140726393	LINE/L1	L1MC3	DF04157706	0	0	1	0	0	-1	0	0	0	1	0	0	1	0	0	0	0	0	1	0	1	0	0	6	5	1	17
16	3263368	3263666	SINE/Alu	AluSx4	DF01793590	0	0	0	0	0	-1	0	0	0	0	0	1	1	1	0	0	0	0	0	0	1	0	1	6	5	1	17
4	139046568	139046874	SINE/Alu	AluY	DF03823302	0	0	1	0	0	-1	1	0	0	0	0	0	0	0	0	1	0	0	1	0	0	1	0	6	5	1	17
16	69635847	69637415	LTR/ERVL-MaLR	THE1A-int	DF01930075	0	0	0	0	0	1	0	0	0	-1	0	0	0	0	0	0	0	0	1	1	1	0	1	6	5	1	17
4	8361455	8363578	LTR/ERV1	MER41-int	DF03589791	0	0	-1	0	0	1	1	0	0	0	0	0	0	0	0	0	1	0	0	1	1	0	0	6	5	1	17
16	22298460	22298618	SINE/MIR	MIR	DF01845539	0	0	1	0	0	-1	0	0	0	0	0	0	1	0	0	0	0	0	1	1	1	0	0	6	5	1	17
11	14257982	14258754	LTR	LTR91A	DF00760448	0	0	1	0	-1	0	0	0	0	0	0	1	0	0	0	1	0	0	0	1	1	0	0	6	5	1	17
6	85673803	85674336	LINE/L2	L2	DF04408763	0	0	0	0	0	0	0	0	0	0	0	0	1	0	1	0	0	0	-1	1	1	0	1	6	5	1	17
3	190424650	190424916	SINE/Alu	AluSx1	DF03555673	0	0	0	0	0	-1	0	0	0	0	0	1	1	0	0	0	0	0	1	1	1	0	0	6	5	1	17
1	154672060	154677247	LTR/ERV1	HERV9NC-int	DF00289614	0	0	0	0	0	0	-1	1	0	0	1	1	0	0	0	0	0	0	1	1	0	0	0	6	5	1	17
6	26537498	26537571	tRNA	tRNA-Arg-CGY	DF04301130	0	0	0	0	0	-1	0	0	0	0	0	1	1	0	0	0	0	0	1	1	1	0	0	6	5	1	17
2	216511672	216512926	LTR/ERVL	ERVL-E-int	DF02883708	0	0	0	0	0	-1	0	0	0	0	0	1	1	0	0	0	0	0	1	0	1	0	1	6	5	1	17
9	21324012	21324508	LTR/ERVL-MaLR	MLT1F1	DF05180915	0	0	1	0	1	-1	0	0	0	0	0	0	1	0	0	1	0	0	1	0	0	0	0	6	5	1	17
3	9388322	9388797	DNA/hAT-Charlie	Charlie1	DF03212233	0	0	0	0	0	-1	0	1	0	0	0	1	0	0	0	0	0	0	1	1	0	0	1	6	5	1	17
10	27587034	27593438	LINE/L1	L1PA7	DF00529939	0	0	1	0	0	-1	0	0	0	0	0	1	0	0	0	0	0	0	1	0	1	0	1	6	5	1	17
12	11256066	11261810	LINE/L1	L1PA10	DF01019707	0	0	1	0	-1	-1	0	0	0	0	0	0	0	0	0	0	0	0	1	1	1	0	1	7	5	2	16
8	89585841	89587570	LINE/L1	L1PA14	DF05028681	0	0	1	0	1	0	0	0	0	-1	0	-1	0	0	0	0	0	0	0	1	1	0	1	7	5	2	16
17	43136164	43137438	LINE/L1	L1PA5	DF02070641	1	0	1	0	1	-1	0	0	0	0	0	0	0	0	0	1	0	0	-1	1	0	0	0	7	5	2	16
1	155651438	155652714	LTR/ERV1	HERVFH21-int	DF00292009	0	0	0	0	-1	-1	0	0	0	0	0	1	1	0	0	0	0	0	1	0	1	0	1	7	5	2	16
1	93374580	93377102	LINE/L1	L1MA3	DF00211325	0	0	1	0	-1	0	-1	0	0	0	0	1	0	0	0	0	0	0	1	0	1	0	1	7	5	2	16
3	31647825	31650279	LINE/L1	L1MA4A	DF03257128	0	0	1	0	-1	0	-1	0	0	0	0	1	1	0	0	0	0	0	0	1	0	0	1	7	5	2	16
2	190957392	190959558	LINE/L1	L1PA7	DF02799933	0	0	-1	0	-1	0	0	0	0	0	0	1	1	0	0	0	0	0	0	1	1	0	1	7	5	2	16
1	109217161	109217391	DNA/TcMar-Tigger	MER47A	DF00239820	1	0	1	0	1	0	0	0	0	0	1	-1	0	0	0	1	0	0	-1	0	0	0	0	7	5	2	16
1	155653796	155658020	LTR/ERV1	HERV4_I-int	DF00292012	0	0	0	0	-1	-1	0	0	0	0	0	1	1	0	0	0	0	0	1	0	1	0	1	7	5	2	16
8	145062207	145065799	LTR/ERVK	HERVK13-int	DF05141994	0	0	0	0	-1	-1	0	0	0	0	0	1	1	0	0	0	0	0	1	0	1	0	1	7	5	2	16
2	162309597	162310097	LTR/ERVL-MaLR	MLT1A-int	DF02749515	0	0	0	1	-1	0	0	-1	0	0	0	0	0	0	0	1	0	0	1	1	0	0	1	7	5	2	16
19	57302080	57302755	LINE/L1	L1M2a	DF02441328	1	0	1	0	0	1	0	0	0	-1	0	-1	0	0	0	1	0	0	0	1	0	0	0	7	5	2	16
19	57301227	57302081	LINE/L1	L1M2a	DF02441327	1	0	1	0	0	1	0	0	0	-1	0	-1	0	0	0	1	0	0	0	1	0	0	0	7	5	2	16
5	82267757	82271274	LTR/ERV1	Harlequin-int	DF04056133	0	0	0	0	0	-1	-1	0	0	0	0	1	1	0	0	0	0	0	1	0	1	0	1	7	5	2	16
6	30520820	30526973	LINE/L1	L1PA6	DF04309421	0	0	-1	0	-1	0	0	1	0	0	0	1	0	0	0	0	0	0	1	0	1	0	1	7	5	2	16
7	130872324	130872948	LTR/ERVL-MaLR	MLT1F1	DF04810043	0	0	1	0	1	1	0	0	0	-1	1	-1	0	0	0	0	0	0	0	1	0	0	0	7	5	2	16
19	57295085	57296108	LINE/L1	L1M2	DF02441311	1	0	1	0	0	1	1	0	0	-1	0	-1	0	0	0	0	0	0	0	1	0	0	0	7	5	2	16
X	101634114	101636349	LINE/L1	L1MEj	DF05775501	1	0	1	0	-1	-1	0	0	0	0	0	0	0	0	0	1	0	0	0	1	0	0	1	7	5	2	16
1	109063449	109063741	SINE/Alu	AluSz6	DF00239428	0	0	1	0	1	1	1	0	0	0	-1	-1	0	0	0	0	0	0	-1	0	0	1	0	8	5	3	15
5	179828760	179829815	LINE/L1	HAL1	DF04244439	1	0	1	0	-1	1	0	0	0	-1	0	0	0	0	0	0	0	0	-1	1	1	0	0	8	5	3	15
19	33378013	33378954	DNA/hAT-Charlie	Charlie13a	DF02376177	1	0	1	0	-1	-1	1	0	0	0	0	0	0	0	0	0	0	0	-1	1	-1	0	1	9	5	4	14
11	33705459	33705797	LTR/ERVL	MLT2B3	DF00799001	-1	0	0	-1	1	1	0	0	0	-1	1	-1	0	0	1	0	0	0	1	0	0	-1	-1	11	5	6	12
3	152502368	152506459	LINE/L1	L1M1	DF03482970	0	0	0	0	0	0	0	0	0	0	0	1	0	0	0	0	0	0	1	0	1	0	1	4	4	0	19
16	57300166	57300295	SINE/Alu	AluJb	DF01902965	0	0	0	0	0	0	0	0	0	0	0	1	0	0	0	0	0	0	1	1	1	0	0	4	4	0	19
16	57299951	57300033	tRNA	tRNA-Leu-CTG	DF01902964	0	0	1	0	0	0	0	0	0	0	0	0	0	0	0	0	0	0	1	1	1	0	0	4	4	0	19
3	178961268	178961726	LTR/ERVL-MaLR	MLT1C2	DF03530578	0	0	1	0	0	0	0	0	0	0	0	1	0	0	0	0	0	0	1	0	0	0	1	4	4	0	19
13	49023923	49024823	LINE/L1	L1M2	DF01329393	0	0	1	0	0	0	0	0	0	0	0	0	0	0	0	0	0	0	1	1	0	0	1	4	4	0	19
5	82246561	82248694	LINE/L1	L1M4a1	DF04056085	0	0	0	0	0	0	0	0	0	0	0	1	1	0	0	0	0	0	1	0	1	0	0	4	4	0	19
9	32429607	32429819	SINE/MIR	MIR	DF05199552	0	0	0	0	0	0	0	0	0	0	0	1	0	0	0	0	0	0	1	0	1	0	1	4	4	0	19
4	15819340	15824339	LINE/L1	L1PA10	DF03604951	0	1	0	1	0	0	0	0	0	0	0	0	0	0	0	0	0	0	0	1	0	0	1	4	4	0	19
12	103952091	103952797	LINE/L1	L1MB8	DF01193344	1	0	1	0	0	0	0	0	0	0	0	0	1	0	0	0	0	0	0	1	0	0	0	4	4	0	19
15	65679757	65680457	LINE/L1	HAL1ME	DF01709334	0	0	0	0	0	0	0	0	0	0	0	1	0	0	0	0	0	0	0	1	1	0	1	4	4	0	19
15	65681572	65681866	SINE/Alu	AluSx3	DF01709337	0	0	0	0	0	0	0	0	0	0	1	1	0	0	0	0	0	0	0	1	0	0	1	4	4	0	19
9	32483505	32483877	LINE/L2	L2b	DF05199658	0	0	0	0	0	0	0	0	0	0	0	0	0	0	0	0	0	0	1	1	1	0	1	4	4	0	19
12	124940176	124940270	DNA/hAT-Charlie	MER5A	DF01250631	0	0	0	0	0	0	0	0	0	0	0	1	0	0	0	0	0	0	1	1	1	0	0	4	4	0	19
12	50492385	50498325	LTR/ERVK	HERVK9-int	DF01088040	0	0	0	0	0	0	0	0	0	0	0	1	0	0	0	0	0	0	1	0	1	0	1	4	4	0	19
15	63096860	63097155	SINE/Alu	AluSp	DF01702939	0	0	0	0	0	0	0	0	0	0	1	1	1	0	0	0	0	0	1	0	0	0	0	4	4	0	19
15	44719575	44719944	LTR/ERV1	MER57B2	DF01666320	0	0	0	0	0	0	0	0	0	0	0	1	1	0	0	0	0	0	0	1	0	0	1	4	4	0	19
6	111505511	111507862	LINE/L1	L1P2	DF04455271	0	0	0	0	0	1	0	0	0	0	0	1	0	0	0	0	0	0	1	1	0	0	0	4	4	0	19
19	44195780	44196777	LTR/ERVL	ERVL-E-int	DF02404230	1	0	0	0	0	0	0	0	0	0	0	1	0	0	0	0	0	0	1	0	1	0	0	4	4	0	19
6	75251297	75251988	LINE/L1	L1ME1	DF04391430	0	0	0	0	0	1	0	0	0	0	0	1	0	0	0	0	0	0	0	0	1	0	1	4	4	0	19
1	78008230	78008745	LINE/L1	L1ME1	DF00182832	0	0	0	0	0	0	0	0	0	0	0	1	0	0	0	0	0	0	0	1	1	0	1	4	4	0	19
8	140491858	140492154	SINE/Alu	AluSx	DF05133748	0	0	0	0	0	0	0	0	0	0	1	1	1	0	0	0	0	0	0	0	1	0	0	4	4	0	19
8	89708184	89714341	LINE/L1	L1PA4	DF05028886	0	0	1	0	0	0	0	0	0	0	0	0	0	0	0	0	0	0	1	1	0	0	1	4	4	0	19
5	151835449	151837952	LINE/L1	L1PA7	DF04182308	0	0	0	0	0	0	0	0	0	0	0	1	0	0	0	0	0	0	0	1	1	0	1	4	4	0	19
11	87349702	87351558	DNA/MULE-MuDR	Ricksha_c	DF00904974	0	0	1	0	0	0	0	0	0	0	0	1	0	0	0	0	0	0	1	0	0	0	1	4	4	0	19
12	19535484	19536176	LINE/L2	L2a	DF01035504	0	0	1	0	0	0	0	0	0	0	0	1	0	0	0	0	0	0	0	0	1	0	1	4	4	0	19
9	32501895	32502544	LINE/L1	L1MB7	DF05199701	0	0	0	0	0	0	0	0	0	0	0	0	0	0	0	0	0	0	1	1	1	0	1	4	4	0	19
1	236198505	236202408	LINE/L1	L1PB2	DF00485785	0	0	1	0	0	1	0	0	0	0	0	1	0	0	0	0	0	0	0	0	1	0	0	4	4	0	19
9	106040426	106044033	LTR/ERVL	HERVL-int	DF05321263	0	0	0	0	0	0	0	0	0	1	0	0	0	0	0	0	0	0	1	0	1	0	1	4	4	0	19
14	100372882	100373181	LINE/L2	L2c	DF01604151	0	0	1	0	0	1	0	0	0	0	0	0	0	0	0	0	0	0	0	1	0	0	1	4	4	0	19
15	65683719	65684817	LINE/L1	L1MB7	DF01709340	0	0	0	0	0	0	0	0	0	0	0	1	0	0	0	0	0	0	0	1	1	0	1	4	4	0	19
9	19358290	19359240	LINE/L1	L1MC5	DF05177336	0	0	0	0	0	0	0	0	0	0	0	1	1	0	0	0	0	0	1	0	1	0	0	4	4	0	19
6	26281976	26282904	LINE/L2	L2a	DF04300531	0	0	0	1	0	0	0	0	0	0	0	1	0	0	0	0	0	0	0	0	1	0	1	4	4	0	19
1	24515863	24516163	SINE/Alu	AluSg	DF00056397	0	0	0	0	0	0	0	0	0	0	0	1	1	0	0	0	0	0	1	0	1	0	0	4	4	0	19
1	78622488	78623056	LTR/ERVL-MaLR	MLT1F2	DF00184005	0	0	0	1	1	0	0	0	0	0	0	0	0	0	0	1	0	0	0	1	0	0	0	4	4	0	19
12	19766805	19769735	LINE/L1	L1PA15	DF01035961	0	0	0	0	0	0	0	0	0	0	0	1	0	0	0	0	0	0	1	0	1	0	1	4	4	0	19
15	88663898	88665779	LINE/L1	L1M1	DF01760301	0	1	0	0	0	0	0	0	0	0	0	1	1	0	0	0	0	0	0	0	0	0	1	4	4	0	19
7	26175860	26177211	Retroposon/SVA	SVA_A	DF04610450	0	0	0	0	0	0	0	0	0	0	0	1	0	0	0	0	0	0	0	1	1	0	1	4	4	0	19
7	26180602	26180750	LINE/L2	L2d	DF04610458	0	0	0	0	0	0	0	0	0	0	0	1	0	0	0	0	0	0	1	1	0	0	1	4	4	0	19
2	162266280	162266817	LTR/ERVL-MaLR	MLT1E1A	DF02749446	0	0	0	0	0	0	0	0	0	0	0	0	1	0	0	0	0	0	1	1	0	0	1	4	4	0	19
6	63566560	63568707	DNA/TcMar-Tigger	Tigger1	DF04371998	0	0	0	0	0	0	0	0	0	0	0	1	0	0	0	0	0	0	1	0	1	0	1	4	4	0	19
X	45064861	45065692	LINE/L2	L2a	DF05685119	0	1	0	0	0	0	0	0	0	0	0	1	0	0	0	0	0	0	0	1	0	0	1	4	4	0	19
2	6881962	6883076	LINE/L1	HAL1	DF02456706	0	0	0	1	0	0	0	0	0	0	0	0	0	0	0	0	0	0	1	1	0	0	1	4	4	0	19
9	32492942	32493189	SINE/MIR	MIR	DF05199677	0	0	0	0	0	0	0	0	0	0	0	1	0	0	0	0	0	0	0	1	1	0	1	4	4	0	19
2	101847027	101848183	DNA/TcMar-Tigger	Tigger3b	DF02638910	0	0	0	0	0	1	0	0	0	0	0	0	0	0	0	0	0	0	1	1	0	0	1	4	4	0	19
5	143068264	143069371	LINE/L2	L2a	DF04162751	0	0	0	0	1	0	0	0	0	0	1	0	0	0	0	1	0	0	0	1	0	0	0	4	4	0	19
17	35869774	35870103	LINE/L2	L2c	DF02053155	0	0	0	0	0	0	0	0	0	0	0	0	1	0	0	0	0	0	1	0	1	0	1	4	4	0	19
17	18272095	18272683	LINE/L1	L1MB5	DF02021651	0	0	1	0	1	0	0	0	0	0	0	0	0	0	0	0	1	0	0	0	0	1	0	4	4	0	19
3	146514253	146515103	LTR/ERV1	LTR1D	DF03472056	0	0	0	0	0	1	0	0	0	0	0	1	1	0	0	0	0	0	0	0	0	0	1	4	4	0	19
3	178789339	178792808	LINE/L1	L1M1	DF03530286	0	0	1	0	0	0	0	0	0	0	0	1	0	0	0	0	0	0	1	0	0	0	1	4	4	0	19
8	23065242	23066002	LINE/L1	L1MEc	DF04908164	0	0	1	0	0	0	0	0	0	0	0	1	0	0	0	0	0	0	1	0	0	0	1	4	4	0	19
9	3618347	3624811	LINE/L1	L1PA7	DF05148897	0	0	0	0	0	0	0	0	0	0	0	1	0	0	0	0	0	0	1	1	1	0	0	4	4	0	19
19	57314548	57317154	LINE/L1	L1PA15	DF02441356	0	0	0	0	0	0	0	0	0	0	0	1	0	0	0	0	0	0	1	1	1	0	0	4	4	0	19
17	43357800	43358718	LTR/ERV1	PRIMA41-int	DF02071207	0	0	0	0	0	0	0	1	0	0	0	1	0	0	0	0	0	0	0	1	1	0	0	4	4	0	19
6	24669548	24670946	LTR/ERV1	MER4-int	DF04297145	0	0	0	0	0	0	0	0	0	0	0	1	1	0	0	0	0	0	0	1	1	0	0	4	4	0	19
6	134954615	134955814	LTR/Gypsy	MamGyp-int	DF04496221	0	0	0	0	0	0	0	0	0	0	0	1	0	0	0	0	0	0	1	0	1	0	1	4	4	0	19
12	19562458	19563297	LINE/L1	L1M4c	DF01035573	0	0	1	0	0	0	0	0	0	0	0	1	0	0	0	0	0	0	1	0	0	0	1	4	4	0	19
16	70256303	70256599	SINE/Alu	AluSx1	DF01931681	1	0	1	0	0	0	1	0	0	0	0	0	0	0	0	0	0	0	0	1	0	0	0	4	4	0	19
2	101239558	101244225	LTR/ERVK	HERVK11D-int	DF02637555	0	0	0	0	0	0	0	0	0	0	0	1	0	0	0	0	0	0	0	1	1	0	1	4	4	0	19
2	100751995	100752286	SINE/Alu	AluSg7	DF02636524	0	0	0	1	0	0	0	0	0	0	1	1	0	0	0	0	0	0	1	0	0	0	0	4	4	0	19
9	35054451	35054920	DNA/MULE-MuDR	Ricksha_b	DF05205534	0	0	1	0	0	0	0	0	0	0	0	0	0	0	0	0	0	0	0	1	1	0	1	4	4	0	19
2	47100980	47107096	LTR/ERV1	HERV9NC-int	DF02539216	0	0	0	0	0	0	0	0	0	0	0	1	0	0	0	0	0	0	1	0	1	0	1	4	4	0	19
22	28611849	28615953	LINE/L1	L1PA7	DF03138263	0	0	1	0	0	0	0	0	0	0	0	0	0	0	0	0	0	0	1	1	0	0	1	4	4	0	19
10	89345583	89346243	LINE/L1	L1MEd	DF00645657	0	0	0	0	0	0	0	0	0	0	0	0	1	0	0	0	0	0	1	1	0	0	1	4	4	0	19
10	89344121	89344919	LINE/L1	L1MEd	DF00645652	0	0	0	0	0	0	0	0	0	0	0	0	1	0	0	0	0	0	1	1	0	0	1	4	4	0	19
6	27112326	27114110	LTR/ERV1	MER66-int	DF04302310	0	0	0	0	0	0	0	0	0	0	0	1	0	0	0	0	0	0	1	0	1	0	1	4	4	0	19
12	19555687	19556779	LINE/L1	L1MA3	DF01035561	0	0	1	0	0	0	0	0	0	0	0	1	0	0	0	0	0	0	0	1	0	0	1	4	4	0	19
9	93442547	93443522	DNA/TcMar-Tigger	Tigger6a	DF05294984	0	0	0	0	1	0	0	1	0	0	0	0	0	0	0	0	0	0	0	0	1	0	1	4	4	0	19
9	32420459	32420703	LINE/L1	L1MD3	DF05199534	0	0	0	0	0	0	0	0	0	0	0	1	1	0	0	0	0	0	0	0	1	0	1	4	4	0	19
5	44838512	44840142	LTR/ERVL-MaLR	THE1D-int	DF03992634	0	0	0	0	0	0	0	0	0	0	0	1	0	0	0	0	0	0	1	0	1	0	1	4	4	0	19
3	178989578	178990997	LTR/ERVL-MaLR	THE1D-int	DF03530646	0	0	1	0	0	0	0	0	0	0	0	1	0	0	0	0	0	0	1	0	0	0	1	4	4	0	19
9	120902169	120902268	DNA/hAT-Charlie	MER5B	DF05356460	0	0	0	1	1	0	0	0	0	0	0	0	0	0	0	0	0	0	0	1	0	0	1	4	4	0	19
12	104824859	104827858	LTR/ERV1	HUERS-P2-int	DF01195573	0	0	0	0	0	0	0	0	0	0	0	1	0	0	0	0	0	0	1	0	1	0	1	4	4	0	19
1	155745040	155745453	LINE/L1	L1ME3B	DF00292262	0	0	0	0	0	0	0	0	0	0	1	1	0	0	0	0	0	0	0	1	1	0	0	4	4	0	19
7	69213664	69213960	SINE/Alu	AluSg	DF04688779	0	0	0	0	0	0	0	0	0	0	1	0	1	0	0	0	0	0	1	0	1	0	0	4	4	0	19
2	101896536	101896911	LINE/L1	L1MB8	DF02638964	0	0	0	0	0	0	0	0	0	0	0	1	0	0	0	0	0	0	1	1	0	0	1	4	4	0	19
Y	56837128	56851635	Satellite	BSR/Beta	DF05921488	0	0	0	0	0	0	0	0	0	1	0	1	0	0	0	0	0	0	0	1	1	0	0	4	4	0	19
10	89316103	89322227	LINE/L1	L1PA5	DF00645609	0	0	0	0	0	0	0	0	0	0	0	1	1	0	0	0	0	0	0	0	1	0	1	4	4	0	19
3	172381472	172383406	LINE/L1	L1PA7	DF03518415	0	0	1	0	0	1	0	0	0	0	0	1	0	0	0	0	0	0	0	1	0	0	0	4	4	0	19
9	32499960	32500674	LINE/L1	L1ME3F	DF05199697	0	0	0	0	0	0	0	0	0	0	0	0	0	0	0	0	0	0	1	1	1	0	1	4	4	0	19
7	12773664	12775428	LINE/L1	L1PA16	DF04586589	0	0	0	0	0	0	0	0	0	0	0	1	0	0	0	0	0	0	1	0	1	0	1	4	4	0	19
14	69800737	69801313	LINE/L1	L1PREC2	DF01538215	0	0	0	0	0	0	0	0	0	0	0	1	0	0	0	0	0	0	1	0	1	0	1	4	4	0	19
14	61690236	61691823	LINE/L1	L1MC2	DF01521209	0	0	0	0	0	0	0	0	0	0	0	1	0	0	0	0	0	0	1	0	1	0	1	4	4	0	19
14	69814767	69815504	LTR/ERVK	HERVK3-int	DF01538250	0	0	0	0	0	0	0	0	0	0	0	1	1	0	0	0	0	0	1	0	1	0	0	4	4	0	19
13	28688079	28694336	LINE/L1	L1PA7	DF01289834	0	0	0	0	0	0	0	0	0	0	0	1	1	0	0	0	0	0	1	0	1	0	0	4	4	0	19
1	231646102	231652225	LINE/L1	L1PA6	DF00476259	0	0	1	0	0	1	0	0	0	0	0	0	0	0	0	0	0	0	1	0	1	0	0	4	4	0	19
8	23052586	23055434	LTR/ERV1	PABL_A-int	DF04908138	0	0	1	0	0	1	0	0	0	0	0	0	0	0	0	0	0	0	1	0	0	0	1	4	4	0	19
7	26183087	26183266	LINE/L1	L1MEd	DF04610465	0	0	0	0	0	0	0	0	0	0	0	1	0	0	0	0	0	0	1	1	0	0	1	4	4	0	19
7	26182808	26183086	SINE/Alu	AluJb	DF04610464	0	0	0	0	0	0	0	0	0	0	0	1	0	0	0	0	0	0	1	1	0	0	1	4	4	0	19
7	26183269	26183560	SINE/Alu	AluSz	DF04610466	0	0	0	0	0	0	0	0	0	0	0	1	0	0	0	0	0	0	1	1	0	0	1	4	4	0	19
Y	11323528	11331204	Satellite	BSR/Beta	DF05897668	0	0	0	0	0	0	0	0	0	1	0	1	0	0	0	0	0	0	1	1	0	0	0	4	4	0	19
3	101905443	101911850	LINE/L1	L1PA7	DF03386834	0	0	0	0	0	0	0	0	0	0	0	1	0	0	0	0	0	0	1	0	1	0	1	4	4	0	19
10	63375831	63377428	LINE/L1	L1MB3	DF00591652	0	0	1	0	0	1	0	0	0	0	1	0	0	0	0	0	0	0	0	1	0	0	0	4	4	0	19
10	89398544	89399678	LINE/L1	L1MB3	DF00645779	0	0	0	0	0	0	0	0	0	0	0	0	0	0	0	1	0	0	1	1	0	0	1	4	4	0	19
10	89396718	89397533	LINE/L1	L1MB5	DF00645774	0	0	0	0	0	0	0	0	0	0	0	0	1	0	0	0	0	0	1	1	0	0	1	4	4	0	19
7	93140408	93142374	LINE/L2	L2a	DF04737513	0	0	1	1	0	0	0	0	0	0	0	0	1	0	0	0	0	0	0	1	0	0	0	4	4	0	19
12	120608359	120613810	LTR/ERVL	HERVL-int	DF01238549	0	0	0	0	0	0	0	0	0	0	0	1	1	0	0	0	0	0	1	0	1	0	0	4	4	0	19
9	32484090	32484312	LINE/L2	L2b	DF05199660	0	0	0	0	0	0	0	0	0	0	0	0	0	0	0	0	0	0	1	1	1	0	1	4	4	0	19
2	207169552	207171894	DNA/TcMar-Tigger	Tigger1	DF02866975	0	0	0	0	0	0	0	0	0	0	0	1	0	0	0	0	0	0	1	0	1	0	1	4	4	0	19
15	44729723	44730435	LINE/L1	L1MB8	DF01666363	0	0	0	0	0	0	0	0	0	0	0	1	0	0	0	0	0	0	1	1	0	0	1	4	4	0	19
11	75040758	75044424	LTR/ERV1	Harlequin-int	DF00877409	0	0	0	0	0	0	0	0	0	0	0	1	0	0	0	0	0	0	1	0	1	0	1	4	4	0	19
4	88483830	88484994	LINE/L1	L1MEd	DF03738213	0	0	0	0	0	0	0	0	0	0	0	0	0	0	0	0	0	0	1	1	1	0	1	4	4	0	19
14	69815601	69816025	LTR/ERVK	LTR3A	DF01538252	0	0	0	0	0	0	0	0	0	0	0	1	1	0	0	0	0	0	1	0	1	0	0	4	4	0	19
17	35247420	35250377	LTR/ERV1	MER89-int	DF02051833	0	0	1	0	0	1	0	0	0	0	0	0	0	0	0	0	0	0	0	1	0	0	1	4	4	0	19
1	173496095	173499295	LTR/ERV1	PABL_A-int	DF00327014	0	0	0	0	0	0	0	0	0	0	0	1	1	0	0	0	0	0	1	0	1	0	0	4	4	0	19
16	11250383	11250881	LINE/L2	L2a	DF01814334	0	0	0	0	0	0	0	0	0	0	0	1	0	0	0	0	0	0	0	1	1	0	1	4	4	0	19
2	31834384	31835306	LINE/L1	L1PA7	DF02508071	0	0	1	0	0	0	0	0	0	0	0	1	0	0	0	0	0	0	0	0	1	0	1	4	4	0	19
7	27857575	27859877	LINE/L1	L1PA7	DF04613644	0	0	0	0	0	1	0	0	0	0	0	0	0	0	0	0	0	0	1	1	1	0	0	4	4	0	19
12	112984006	112985824	LINE/L1	L1MA4A	DF01217241	0	0	0	0	0	0	0	0	0	0	0	0	1	0	0	0	0	0	1	1	0	0	1	4	4	0	19
2	61535229	61535376	DNA/hAT-Charlie	Charlie4z	DF02566305	0	0	1	0	0	0	0	0	0	0	0	0	0	0	0	0	0	0	1	1	1	0	0	4	4	0	19
13	49050020	49053167	LINE/L1	L1PB1	DF01329435	0	0	1	0	0	0	0	0	0	0	0	0	0	0	0	0	0	0	1	1	0	0	1	4	4	0	19
7	103105958	103108129	LINE/L1	L1PA7	DF04759319	0	0	0	0	0	0	0	0	0	0	0	1	1	0	0	0	0	0	0	1	1	0	0	4	4	0	19
2	99088874	99095402	LINE/L1	L1PB1	DF02633168	0	0	0	0	0	0	0	0	0	0	0	1	0	0	0	0	0	0	1	0	1	0	1	4	4	0	19
21	29356251	29357923	LTR/ERV1	HERV9N-int	DF03073368	0	0	1	0	1	1	0	0	0	0	0	0	0	0	0	0	0	0	0	1	0	0	0	4	4	0	19
1	78649308	78649558	LINE/L2	L2	DF00184043	0	0	0	1	1	0	0	0	0	0	0	0	0	0	0	1	0	0	0	1	0	0	0	4	4	0	19
1	78649081	78649193	DNA/hAT-Charlie	MER102c	DF00184041	0	0	0	1	1	0	0	0	0	0	0	0	0	0	0	1	0	0	0	1	0	0	0	4	4	0	19
2	157704177	157710616	LINE/L1	L1PA7	DF02741238	0	0	1	0	0	1	0	0	0	0	0	0	0	0	0	0	0	0	1	0	0	0	1	4	4	0	19
2	157699028	157704172	LINE/L1	L1PB4	DF02741237	0	0	1	0	0	1	0	0	0	0	0	0	0	0	0	0	0	0	1	0	0	0	1	4	4	0	19
6	85668486	85669541	LINE/L1	L1MC5	DF04408742	0	0	0	0	0	0	0	0	0	0	0	1	1	0	0	0	0	0	0	0	1	0	1	4	4	0	19
2	162258553	162259108	LINE/L2	L2b	DF02749432	0	0	0	0	0	0	0	0	0	0	0	0	1	0	0	0	0	0	1	1	0	0	1	4	4	0	19
9	19366615	19367453	LINE/L1	L1MB8	DF05177359	0	0	0	0	0	0	0	0	0	0	0	1	1	0	0	0	0	0	1	0	1	0	0	4	4	0	19
14	20478925	20479303	LINE/L1	L1MB7	DF01445215	0	0	0	0	0	0	0	0	0	0	0	1	1	0	0	0	0	0	1	0	1	0	0	4	4	0	19
11	27549312	27554966	LTR/ERVL	ERVL-int	DF00786591	0	0	0	0	0	1	0	0	0	0	0	0	0	0	0	0	0	0	1	1	1	0	0	4	4	0	19
3	146497126	146498393	LTR/ERV1	LTR12E	DF03472019	0	0	0	0	0	0	0	0	0	0	0	1	1	0	0	0	0	0	1	0	0	0	1	4	4	0	19
3	146490412	146492251	LINE/L1	L1P4	DF03472013	0	0	0	0	0	0	0	0	0	0	0	1	1	0	0	0	0	0	1	0	0	0	1	4	4	0	19
6	10886422	10886713	SINE/Alu	AluSx	DF04268892	0	0	0	0	0	0	0	0	0	0	1	0	1	0	0	0	0	0	1	0	1	0	0	4	4	0	19
1	27667413	27667589	LTR/ERV1?	LTR103_Mam	DF00065456	0	0	0	1	0	0	0	0	0	0	0	1	0	0	0	1	0	0	0	0	0	0	1	4	4	0	19
1	27666859	27667126	LTR/ERV1?	LTR103_Mam	DF00065454	0	1	0	1	0	0	0	0	0	0	0	0	0	0	0	1	0	0	0	0	0	0	1	4	4	0	19
10	89412948	89413214	LINE/L1	L1PA11	DF00645796	0	0	0	0	0	0	0	0	0	0	1	0	0	0	0	0	0	0	1	1	1	0	0	4	4	0	19
3	122703293	122703714	LINE/L2	L2d2	DF03423847	0	0	0	0	0	0	0	0	0	0	0	1	0	0	0	0	0	0	1	1	0	0	1	4	4	0	19
7	135181467	135181997	LTR/ERV1	HERV1_LTRd	DF04818730	0	0	0	0	1	0	0	0	0	0	0	0	0	0	0	1	0	0	0	1	0	0	1	4	4	0	19
1	235206534	235207600	LINE/L2	L2b	DF00483357	0	0	0	0	0	1	0	0	0	0	0	0	0	0	0	0	0	0	1	1	1	0	0	4	4	0	19
3	101633026	101641504	LTR/ERV1	HERVS71-int	DF03386273	0	0	0	0	0	0	0	0	0	0	0	1	1	0	0	0	0	0	1	0	1	0	0	4	4	0	19
15	49385499	49389644	LINE/L1	L1PB3	DF01675066	0	0	0	0	0	0	0	0	0	0	0	1	0	0	0	0	0	0	1	0	1	0	1	4	4	0	19
21	9011687	9012812	LINE/L1	L1PA15-16	DF03042103	0	0	0	0	0	0	0	0	0	0	1	1	0	0	0	0	0	0	1	0	1	0	0	4	4	0	19
1	100088862	100091023	LINE/L1	L1ME1	DF00223814	0	0	0	0	0	0	0	0	0	0	0	1	0	0	0	0	0	0	1	1	0	0	1	4	4	0	19
14	20479866	20479968	LINE/L2	L2d2	DF01445217	0	0	0	0	0	0	0	0	0	0	1	1	1	0	0	0	0	0	0	0	1	0	0	4	4	0	19
8	143454402	143454710	SINE/Alu	AluY	DF05138962	0	0	0	0	0	0	0	0	0	0	1	1	1	0	0	0	0	0	1	0	0	0	0	4	4	0	19
8	143454078	143454390	SINE/Alu	AluSq	DF05138961	0	0	0	0	0	0	0	0	0	0	1	1	1	0	0	0	0	0	1	0	0	0	0	4	4	0	19
5	14431695	14432064	LTR/ERVL-MaLR	MLT1B	DF03937346	0	0	1	0	0	1	0	0	0	0	0	0	0	0	0	0	0	0	1	0	0	0	1	4	4	0	19
19	48085554	48087653	LINE/L1	L1PBb	DF02416187	0	0	0	1	0	0	0	0	0	0	0	0	0	0	0	0	0	0	0	1	1	0	1	4	4	0	19
3	121875132	121877655	LINE/L1	L1MEi	DF03422070	0	0	0	0	0	0	0	0	0	0	0	1	0	0	0	0	0	0	1	1	1	0	0	4	4	0	19
11	105872939	105879346	LINE/L1	L1PA7	DF00938185	0	0	0	0	0	1	0	0	0	0	0	1	0	0	0	0	0	0	1	0	1	0	0	4	4	0	19
18	51087694	51090633	LINE/L1	L1MD1	DF02248549	0	0	1	0	0	0	0	0	0	0	0	1	0	0	0	0	0	0	0	0	1	0	1	4	4	0	19
7	130863546	130865052	LINE/L1	L1MA4	DF04810028	0	0	1	0	0	1	0	0	0	0	1	0	0	0	0	0	0	0	0	1	0	0	0	4	4	0	19
10	92350318	92350776	LTR/ERVK	LTR3A	DF00651754	0	0	1	0	0	0	0	0	0	0	0	0	0	0	0	0	0	0	1	1	1	0	0	4	4	0	19
9	32515994	32516420	LTR/ERV1	LOR1b	DF05199721	0	0	0	0	0	0	0	0	0	0	0	0	1	0	0	0	0	0	0	1	1	0	1	4	4	0	19
17	43346835	43348633	LTR/ERVK	HERVK13-int	DF02071192	0	0	0	0	0	0	0	0	0	0	0	1	0	0	0	0	0	0	1	1	1	0	0	4	4	0	19
19	18578415	18581619	LTR/ERV1	HERV9-int	DF02352941	0	0	0	0	0	0	0	0	0	0	0	1	1	0	0	0	0	0	1	0	1	0	0	4	4	0	19
5	32664725	32668396	LTR/ERV1	MER52-int	DF03969943	0	0	0	0	0	0	0	0	0	0	0	1	1	0	0	0	0	0	1	0	1	0	0	4	4	0	19
5	109290538	109295628	LINE/L1	L1PA13	DF04100219	0	0	1	0	0	0	0	0	0	0	0	1	0	0	0	0	0	0	1	0	0	0	1	4	4	0	19
5	82266019	82267076	LINE/L1	L1MD2	DF04056130	0	0	0	0	0	0	0	0	0	0	0	1	1	0	0	0	0	0	1	0	1	0	0	4	4	0	19
3	156733526	156735483	LINE/L1	L1PA16	DF03490914	0	0	0	0	0	0	0	0	0	0	0	1	1	0	0	0	0	0	1	0	0	0	1	4	4	0	19
13	48067286	48071461	LTR/ERV1	MER61-int	DF01327432	0	0	1	0	0	0	0	0	0	0	0	1	0	0	0	0	0	0	1	0	0	0	1	4	4	0	19
10	89444636	89450768	LINE/L1	L1PA6	DF00645858	0	0	0	0	0	0	0	0	0	0	0	1	1	0	0	0	0	0	1	0	1	0	0	4	4	0	19
9	32482579	32482867	SINE/Alu	AluSc	DF05199656	0	0	0	0	0	0	0	0	0	0	0	0	0	0	0	0	0	0	1	1	1	0	1	4	4	0	19
15	44718919	44719024	LINE/L2	L2c	DF01666317	0	0	0	0	0	0	0	0	0	0	0	1	0	0	0	0	0	0	1	1	0	0	1	4	4	0	19
6	110700925	110701221	SINE/Alu	AluSg4	DF04453276	0	0	0	0	0	0	0	0	0	0	1	1	1	0	0	0	0	0	0	0	1	0	0	4	4	0	19
17	35243779	35244080	LTR/ERV1	PrimLTR79	DF02051823	0	0	1	0	0	0	0	1	0	0	0	0	0	0	0	0	0	0	0	1	0	0	1	4	4	0	19
1	100043580	100044510	LINE/L1	L1PB2	DF00223715	0	0	1	0	0	0	0	0	0	0	0	0	0	0	0	0	0	0	1	1	0	0	1	4	4	0	19
9	125237824	125238114	SINE/Alu	AluSg	DF05366994	0	0	1	0	0	0	0	0	0	1	0	0	0	0	0	1	0	0	0	1	0	0	0	4	4	0	19
17	15290024	15290315	SINE/Alu	AluSc8	DF02014698	0	0	0	0	0	0	0	0	0	0	1	1	1	0	0	0	0	0	1	0	0	0	0	4	4	0	19
12	87158055	87158359	SINE/Alu	AluSp	DF01157689	0	0	1	0	0	0	0	0	0	0	1	1	1	0	0	0	0	0	0	0	0	0	0	4	4	0	19
9	32957813	32963957	LINE/L1	L1PA6	DF05200652	0	0	0	0	0	0	0	0	0	0	0	1	0	0	0	0	0	0	1	0	1	0	1	4	4	0	19
11	87588726	87595097	LINE/L1	L1PA8A	DF00905471	0	0	1	0	0	0	0	0	0	0	0	1	0	0	0	0	0	0	1	1	0	0	0	4	4	0	19
7	105005315	105005520	LINE/L2	L2c	DF04762837	0	0	0	0	0	0	0	0	0	0	0	0	0	0	0	0	0	0	1	1	1	0	1	4	4	0	19
7	105003905	105004202	LINE/L2	L2d2	DF04762833	0	0	0	0	0	0	0	0	0	0	0	0	0	0	0	0	0	0	1	1	1	0	1	4	4	0	19
20	18517987	18522165	LTR/ERV1	HERVH-int	DF02938194	1	0	1	0	0	0	0	0	0	0	0	0	0	0	0	0	0	0	0	1	0	0	1	4	4	0	19
6	170382425	170384384	LINE/L1	L1MD2	DF04560549	0	0	0	0	0	1	0	0	0	0	0	0	0	0	0	0	0	0	1	1	1	0	0	4	4	0	19
1	78655885	78656221	LTR/ERVL-MaLR	MLT1A0	DF00184057	0	0	0	1	0	0	0	0	0	0	0	0	0	0	0	1	0	0	1	1	0	0	0	4	4	0	19
8	105896672	105901068	LINE/L1	L1P3	DF05061559	0	0	1	0	0	1	0	0	0	0	0	1	0	0	0	0	0	0	1	0	0	0	0	4	4	0	19
11	85542992	85549441	LINE/L1	L1PA7	DF00901108	0	0	0	0	0	0	0	0	0	0	0	1	0	0	0	0	0	0	1	1	1	0	0	4	4	0	19
2	162261317	162262016	LTR/ERVL	LTR41	DF02749438	0	0	0	0	0	0	0	0	0	0	0	0	1	0	0	0	0	0	1	1	0	0	1	4	4	0	19
21	25578623	25578815	LINE/L2	L2d	DF03066281	0	0	0	0	1	0	0	1	0	0	0	0	0	0	0	0	0	0	0	1	0	0	1	4	4	0	19
10	72979473	72982454	LINE/L1	L1MA5A	DF00612580	0	0	1	0	0	0	0	0	0	0	0	1	0	0	0	0	0	0	0	0	1	0	1	4	4	0	19
2	6898824	6904510	LINE/L1	L1PA7	DF02456735	0	0	0	1	0	0	0	0	0	0	0	0	1	0	0	1	0	0	1	0	0	0	0	4	4	0	19
7	105068775	105070316	LINE/L1	L1MC5	DF04762974	0	0	0	0	0	1	0	0	0	0	0	0	0	0	0	0	0	0	1	1	1	0	0	4	4	0	19
12	19609929	19612106	LINE/L1	L1PA15	DF01035668	0	0	1	0	0	0	0	0	0	0	0	1	0	0	0	0	0	0	1	0	0	0	1	4	4	0	19
1	173725765	173731872	LINE/L1	L1PA4	DF00327484	0	0	0	0	0	1	0	0	0	0	0	1	0	0	0	0	0	0	1	1	0	0	0	4	4	0	19
6	85672150	85672443	SINE/Alu	AluJr	DF04408756	0	0	0	0	0	0	0	0	0	0	0	1	1	0	0	0	0	0	0	0	1	0	1	4	4	0	19
6	85672604	85672887	SINE/Alu	AluJr	DF04408758	0	0	0	0	0	0	0	0	0	0	0	1	1	0	0	0	0	0	0	0	1	0	1	4	4	0	19
11	33676856	33683361	LINE/L1	L1PB1	DF00798949	0	0	0	0	0	0	0	0	0	0	0	1	0	0	0	0	0	0	1	0	1	0	1	4	4	0	19
12	19569888	19570761	LINE/L1	L1PREC2	DF01035581	0	0	1	0	0	0	0	0	0	0	0	1	0	0	0	0	0	0	1	1	0	0	0	4	4	0	19
12	1982681	1985807	LINE/L1	L1ME2	DF01000836	0	0	0	0	0	1	0	0	0	0	0	0	0	0	0	0	0	0	1	1	0	0	1	4	4	0	19
4	763493	764308	LINE/L1	L1MC1	DF03574187	1	0	1	0	0	0	0	0	0	0	0	0	0	0	0	0	0	0	0	1	1	0	0	4	4	0	19
1	231328278	231329243	LINE/L1	L1ME4b	DF00475520	0	0	0	0	0	0	0	0	0	0	0	0	0	0	0	0	0	0	1	1	1	1	0	4	4	0	19
18	80151873	80152674	LINE/L1	L1PB4	DF02299961	0	0	1	0	0	0	0	0	0	0	0	1	0	0	0	0	0	0	0	0	1	0	1	4	4	0	19
10	89399679	89400080	LTR/ERVL-MaLR	MLT1B	DF00645780	0	0	0	1	0	0	0	0	0	0	0	0	1	0	0	1	0	0	0	1	0	0	0	4	4	0	19
2	203307893	203309463	LTR/ERVL-MaLR	THE1B-int	DF02823472	0	0	0	0	0	1	0	1	0	0	0	0	0	0	0	0	0	0	0	0	1	0	1	4	4	0	19
12	121028219	121028748	LTR/ERVL-MaLR	MLT1O	DF01239711	0	0	0	0	0	0	0	0	0	0	0	0	1	0	0	0	0	0	1	1	0	0	1	4	4	0	19
6	85673460	85673774	LINE/L2	L2	DF04408762	0	0	0	0	0	0	0	0	0	0	0	1	1	0	0	0	0	0	0	0	1	0	1	4	4	0	19
2	190971706	190972012	SINE/Alu	AluSx	DF02799945	0	0	0	1	0	0	0	0	0	0	1	1	0	0	0	0	0	0	0	0	0	0	1	4	4	0	19
7	26187402	26187507	SINE/Alu	AluJr	DF04610470	0	0	0	0	0	0	0	0	0	0	0	1	0	0	0	0	0	0	1	1	0	0	1	4	4	0	19
3	146477112	146483128	LINE/L1	L1PA6	DF03472002	0	0	0	0	0	0	0	0	0	0	0	1	1	0	0	0	0	0	1	0	0	0	1	4	4	0	19
2	108388304	108389094	LINE/L2	L2d2	DF02650568	1	0	0	0	0	1	1	0	0	0	0	0	0	0	0	1	0	0	0	0	0	0	0	4	4	0	19
11	59683515	59686356	LINE/L1	L1MA6	DF00841532	0	0	0	0	0	0	0	0	0	0	0	1	0	0	0	0	0	0	0	1	1	0	1	4	4	0	19
2	216513957	216514741	LINE/L1	L1MEg	DF02883713	0	0	0	0	0	0	0	0	0	0	0	1	0	0	0	0	0	0	1	0	1	0	1	4	4	0	19
5	43282294	43284095	LTR/ERVL	ERV3-16A3_I-int	DF03990150	0	0	1	0	0	0	0	0	0	0	0	1	1	0	0	0	0	0	0	0	1	0	0	4	4	0	19
7	91818993	91825523	LINE/L1	L1PB1	DF04735043	0	0	0	0	0	0	0	0	0	0	0	1	0	0	0	0	0	0	1	1	0	0	1	4	4	0	19
14	69822975	69827310	LTR/ERVL	HERVL-int	DF01538278	0	0	0	0	0	0	0	0	0	0	0	1	1	0	0	0	0	0	1	0	1	0	0	4	4	0	19
12	370614	376720	LINE/L1	L1PA5	DF00997110	0	0	0	0	0	1	0	0	0	0	0	0	0	0	0	0	0	0	1	1	1	0	0	4	4	0	19
9	32524583	32524870	SINE/Alu	AluSx4	DF05199730	0	0	0	0	0	0	0	0	0	0	1	0	1	0	0	0	0	0	0	1	1	0	0	4	4	0	19
6	36612924	36613851	DNA/TcMar-Tigger	Tigger1	DF04323749	0	0	0	0	0	0	0	0	0	0	0	1	0	0	0	0	0	0	1	0	1	0	1	4	4	0	19
3	139410752	139415439	LINE/L1	L1PB2	DF03458577	0	0	0	0	0	1	0	0	0	0	0	0	0	0	0	0	0	0	1	1	0	0	1	4	4	0	19
1	78648622	78648863	LINE/L2	L2a	DF00184039	0	0	0	1	1	0	0	0	0	0	0	0	0	0	0	1	0	0	0	1	0	0	0	4	4	0	19
10	27596540	27600039	LINE/L1	L1M4c	DF00529948	0	0	0	0	0	0	0	0	0	0	0	1	0	0	0	0	0	0	1	0	1	0	1	4	4	0	19
7	26157738	26158026	LTR/ERVL-MaLR	MLT1C	DF04610401	0	0	0	0	0	0	0	0	0	0	0	1	0	0	0	0	0	0	1	1	1	0	0	4	4	0	19
5	98945199	98946876	LTR/ERVL	ERV3-16A3_I-int	DF04083410	0	0	0	0	0	1	0	0	0	0	0	0	0	0	0	0	0	0	1	0	1	0	1	4	4	0	19
11	87359937	87362998	LTR/ERVL	HERVL18-int	DF00904993	0	0	1	0	0	0	0	0	0	0	0	1	0	0	0	0	0	0	1	0	0	0	1	4	4	0	19
6	28935963	28936229	SINE/Alu	AluJb	DF04306451	0	0	0	0	0	0	0	0	0	0	1	0	1	0	0	0	0	0	1	0	1	0	0	4	4	0	19
2	216505818	216506121	SINE/Alu	AluSg	DF02883692	0	0	0	0	0	0	0	0	0	0	0	1	1	0	0	0	0	0	1	0	1	0	0	4	4	0	19
5	179826168	179826466	SINE/Alu	AluSx1	DF04244432	0	0	1	0	0	1	1	0	0	0	0	0	0	0	0	0	0	0	1	0	0	0	0	4	4	0	19
2	37629319	37630895	DNA/hAT-Tip100	FordPrefect	DF02519651	0	0	0	0	0	0	0	0	0	0	0	1	1	0	0	0	0	0	1	0	0	0	1	4	4	0	19
6	166347964	166348893	DNA/TcMar-Mariner	HSMAR2	DF04555033	0	0	0	0	1	0	0	0	0	0	0	0	0	0	0	1	0	0	1	0	1	0	0	4	4	0	19
6	26180259	26180564	SINE/Alu	AluSx	DF04300321	0	0	0	0	0	0	0	0	0	0	0	1	1	0	0	0	0	0	1	0	1	0	0	4	4	0	19
X	74191726	74195125	LINE/L1	L1MA8	DF05732983	0	0	0	0	0	1	0	0	0	0	0	0	0	0	0	0	0	0	0	1	1	0	1	4	4	0	19
2	162308095	162308374	LTR/ERVL-MaLR	MLT1A	DF02749510	0	0	0	1	0	0	0	0	0	0	0	0	0	0	0	1	0	0	0	1	0	0	1	4	4	0	19
17	7506297	7506756	LINE/L1	L1M4	DF01996636	0	0	0	0	0	0	0	1	0	0	0	1	0	0	0	0	0	0	0	0	1	0	1	4	4	0	19
10	89303797	89304116	LTR/ERVL-MaLR	MLT1O	DF00645588	0	0	0	0	0	0	0	0	0	0	0	0	1	0	0	0	0	0	1	1	0	0	1	4	4	0	19
3	178888765	178892798	LINE/L1	L1MA2	DF03530440	0	0	1	0	0	0	0	0	0	0	0	1	0	0	0	0	0	0	1	0	0	0	1	4	4	0	19
14	61116763	61120030	LTR/ERV1	Harlequin-int	DF01520001	0	0	0	0	0	1	0	0	0	0	0	1	0	0	0	0	0	0	1	0	1	0	0	4	4	0	19
7	104992138	104992260	SINE/Alu	AluYe5	DF04762808	0	0	0	0	0	0	0	0	0	0	0	0	0	0	0	0	0	0	1	1	1	0	1	4	4	0	19
7	104987330	104987630	SINE/Alu	AluY	DF04762800	0	0	0	0	0	0	0	0	0	0	0	0	0	0	0	0	0	0	1	1	1	0	1	4	4	0	19
7	104989119	104989425	DNA/hAT-Charlie	MER1B	DF04762803	0	0	0	0	0	1	0	0	0	0	0	0	0	0	0	0	0	0	0	1	1	0	1	4	4	0	19
1	78661065	78661362	SINE/Alu	AluSx	DF00184063	0	0	0	1	1	0	0	0	0	0	0	0	0	0	0	1	0	0	0	1	0	0	0	4	4	0	19
17	43335663	43337361	LTR/ERVK	HERVK13-int	DF02071186	0	0	0	0	0	0	0	0	0	0	0	1	0	0	0	0	0	0	1	1	1	0	0	4	4	0	19
4	55438767	55440018	LINE/L1	L1MB3	DF03678969	0	0	1	0	0	0	0	0	0	0	0	0	0	0	0	0	0	0	1	0	1	0	1	4	4	0	19
21	25583665	25584869	LINE/L1	HAL1ME	DF03066298	0	0	0	0	0	0	0	1	0	0	0	0	0	0	0	0	0	0	1	1	0	0	1	4	4	0	19
X	74562660	74566096	LINE/L1	L1MA2	DF05733781	0	0	0	0	0	0	0	0	0	0	0	1	0	0	0	0	0	0	1	0	1	0	1	4	4	0	19
16	31927829	31932141	LINE/L1	L1PA15	DF01872797	0	0	0	0	0	0	0	0	0	0	0	1	1	0	0	0	0	0	0	0	1	0	1	4	4	0	19
7	26158756	26158975	SINE/MIR	MIR	DF04610404	0	0	0	0	0	0	0	0	0	0	0	1	0	0	0	0	0	0	1	1	0	0	1	4	4	0	19
2	85499399	85499678	SINE/Alu	AluSx	DF02613620	0	0	0	0	0	0	0	0	0	0	0	1	1	0	0	0	0	0	1	0	1	0	0	4	4	0	19
9	32437121	32437369	SINE/MIR	MIR	DF05199565	0	0	0	0	0	0	0	0	0	0	0	1	0	0	0	0	0	0	1	1	1	0	0	4	4	0	19
1	110930991	110933269	LINE/L1	L1PA6	DF00243214	0	0	0	0	0	0	0	0	0	0	0	1	0	0	0	0	0	0	1	1	1	0	0	4	4	0	19
6	100636106	100638460	DNA/TcMar-Tigger	Tigger1	DF04434238	0	0	1	0	0	0	0	0	0	0	0	1	0	0	0	0	0	0	1	0	0	0	1	4	4	0	19
4	776924	777525	LINE/L1	L1MD3	DF03574204	1	0	1	0	1	0	0	0	0	0	0	0	0	0	0	0	0	0	0	1	0	0	0	4	4	0	19
4	777815	778600	LINE/L1	L1MD3	DF03574206	1	0	1	0	0	0	0	0	0	0	0	0	0	0	0	0	0	0	0	1	0	0	1	4	4	0	19
16	31765089	31767418	LTR/ERVK	HERVK22-int	DF01872533	0	0	1	0	0	0	0	0	0	0	0	1	0	0	0	0	0	0	1	0	0	0	1	4	4	0	19
2	162326818	162327921	LTR/ERV1	HUERS-P2-int	DF02749543	0	0	0	0	0	0	0	0	0	0	0	0	1	0	0	0	0	0	1	1	0	0	1	4	4	0	19
14	76224396	76226521	LINE/L1	L1ME3A	DF01553132	0	0	0	0	0	0	0	0	0	0	0	1	0	0	0	0	0	0	1	0	1	0	1	4	4	0	19
1	161976627	161977805	LTR/ERV1	LTR78	DF00304687	0	0	0	0	0	0	0	0	0	0	0	1	0	0	0	0	0	0	1	0	1	0	1	4	4	0	19
21	25433893	25439626	LINE/L1	L1PA7	DF03066005	0	0	0	0	0	0	0	0	0	0	0	1	0	0	0	0	0	0	1	0	1	0	1	4	4	0	19
2	101852750	101854302	LINE/L1	HAL1	DF02638919	0	0	0	0	0	1	0	0	0	0	0	0	0	0	0	0	0	0	1	1	0	0	1	4	4	0	19
2	101848591	101848976	LINE/L1	L1M7	DF02638913	0	0	0	0	0	1	0	0	0	0	0	0	0	0	0	0	0	0	1	1	0	0	1	4	4	0	19
22	28528948	28535074	LINE/L1	L1PA5	DF03138072	0	0	1	0	0	1	0	0	0	0	0	0	0	0	0	0	0	0	1	0	0	0	1	4	4	0	19
6	111365604	111366881	LINE/L2	L2c	DF04455005	0	0	0	0	0	1	0	0	0	0	0	1	0	0	0	0	0	0	0	1	0	0	1	4	4	0	19
5	82272251	82272903	LTR/ERV1	Harlequin-int	DF04056135	0	0	0	0	0	0	0	0	0	0	0	1	1	0	0	0	0	0	1	0	1	0	0	4	4	0	19
17	31550074	31550145	tRNA	tRNA-Thr-ACG	DF02042731	0	0	0	0	0	1	0	0	0	1	0	0	1	0	0	0	0	0	0	0	1	0	0	4	4	0	19
10	89061203	89062762	LINE/L1	L1ME3A	DF00645091	0	0	0	0	0	0	0	0	0	0	0	1	0	0	0	1	0	0	1	0	0	0	1	4	4	0	19
3	9380936	9381229	SINE/Alu	AluJr4	DF03212221	0	0	0	0	0	0	0	0	0	0	0	1	1	0	0	0	0	0	0	0	1	0	1	4	4	0	19
10	101811437	101811713	SINE/Alu	AluJb	DF00673345	0	0	0	0	0	0	0	1	0	0	0	0	0	0	1	0	0	0	1	0	0	0	1	4	4	0	19
12	19540286	19541634	LINE/L1	L1MA6	DF01035520	0	0	1	0	0	0	0	0	0	0	0	1	0	0	0	0	0	0	0	1	0	0	1	4	4	0	19
6	110917863	110922603	LTR/ERVK	HERVK9-int	DF04453901	0	0	0	0	0	0	0	0	0	0	0	1	0	0	0	0	0	0	1	0	1	0	1	4	4	0	19
5	132480456	132480752	SINE/Alu	AluSx	DF04140208	0	0	0	0	0	0	0	0	0	0	1	1	0	0	0	0	0	0	1	0	0	0	1	4	4	0	19
5	132478185	132478371	SINE/MIR	MIRb	DF04140207	0	0	0	0	0	0	0	0	0	0	0	1	0	0	0	0	0	0	1	0	1	0	1	4	4	0	19
X	103683756	103683978	LINE/L2	L2d	DF05779166	1	0	0	0	0	0	0	0	0	0	0	0	1	0	0	0	0	0	0	1	0	0	1	4	4	0	19
9	120900564	120900865	SINE/Alu	AluJr	DF05356455	0	0	0	1	0	0	0	1	0	0	0	0	0	0	0	0	0	0	0	1	0	0	1	4	4	0	19
9	99156133	99157656	LINE/L1	L1M4a2	DF05307686	0	0	1	0	0	0	0	0	0	0	0	1	0	0	0	0	0	0	0	0	1	0	1	4	4	0	19
13	49008839	49009573	LINE/L1	L1MC2	DF01329370	0	0	1	0	0	0	0	0	0	0	0	0	0	0	0	0	0	0	1	1	0	0	1	4	4	0	19
12	96961247	96962419	LINE/L1	L1M4c	DF01178456	0	0	0	0	0	0	0	0	0	0	0	0	1	0	0	0	0	0	1	1	1	0	0	4	4	0	19
7	127342968	127345124	LINE/L1	L1ME4a	DF04802090	0	0	0	0	1	0	0	0	0	0	0	0	0	0	0	0	1	0	0	0	1	0	1	4	4	0	19
1	204398196	204398488	SINE/Alu	AluJr	DF00385716	0	0	0	1	0	0	0	0	0	0	0	1	0	0	0	0	0	0	0	0	1	0	1	4	4	0	19
1	169871519	169873077	LTR/ERVL-MaLR	THE1B-int	DF00320399	0	0	0	0	0	0	0	0	0	0	0	0	0	0	0	0	0	0	1	1	1	1	0	4	4	0	19
5	151830849	151833457	LINE/L1	L1PA7	DF04182303	0	0	1	0	0	0	0	0	0	0	0	1	1	0	0	0	0	0	0	0	1	0	0	4	4	0	19
3	172395594	172396349	LINE/L1	L1ME2	DF03518437	1	0	1	0	0	0	0	0	0	0	0	1	0	0	0	0	0	0	0	1	0	0	0	4	4	0	19
3	51386526	51386814	LINE/L2	L2c	DF03298742	1	0	1	0	0	0	0	0	0	0	0	0	0	0	0	0	0	0	0	1	0	0	1	4	4	0	19
9	32424863	32425306	LINE/L2	L2d2	DF05199544	0	0	0	0	0	0	0	0	0	0	0	1	0	0	0	0	0	0	1	0	1	0	1	4	4	0	19
2	111133304	111135348	LINE/L1	L1MD2	DF02655851	0	0	0	0	0	1	0	0	0	0	0	1	0	0	1	0	0	0	0	0	0	0	1	4	4	0	19
X	41027706	41028002	SINE/Alu	AluSp	DF05676126	0	0	0	0	0	0	0	0	0	0	0	1	1	0	0	0	0	0	1	0	1	0	0	4	4	0	19
12	10211959	10212242	SINE/Alu	AluSp	DF01017932	0	0	0	0	0	0	0	0	0	0	0	1	1	0	0	0	0	0	1	0	1	0	0	4	4	0	19
15	65688958	65690065	LINE/L1	L1MEg1	DF01709351	0	0	0	0	0	0	0	0	0	0	1	1	0	0	0	0	0	0	0	1	0	0	1	4	4	0	19
12	111904370	111907473	LINE/L1	L1MA2	DF01214214	0	0	0	0	0	0	0	0	0	0	0	1	1	0	0	0	0	0	1	0	0	0	1	4	4	0	19
19	36636543	36637090	LTR/ERVK	LTR14	DF02384395	0	0	0	0	0	0	0	0	0	0	0	1	1	0	0	1	0	0	1	0	0	0	0	4	4	0	19
6	26556826	26556932	DNA/hAT-Charlie	MER5A1	DF04301169	0	0	0	0	0	0	0	0	0	0	0	1	0	0	0	0	0	0	1	1	1	0	0	4	4	0	19
2	237106885	237109434	LINE/L1	L1MC4	DF02926456	0	0	0	0	0	0	0	0	0	0	0	1	0	0	0	0	0	0	1	0	1	0	1	4	4	0	19
6	29952157	29952987	DNA/hAT-Charlie	Charlie9	DF04308259	0	0	0	0	0	0	0	0	0	0	0	1	0	0	0	0	0	0	1	0	1	0	1	4	4	0	19
4	88441726	88442164	LINE/L2	L2d	DF03738112	0	0	0	0	0	0	0	0	0	0	0	1	1	0	0	1	0	0	0	0	0	0	1	4	4	0	19
4	88444281	88446113	LTR/ERV1	HERV4_I-int	DF03738116	0	0	0	0	0	0	0	0	0	0	0	1	1	0	0	0	0	0	1	0	0	0	1	4	4	0	19
9	32466875	32467404	LINE/L2	L2d	DF05199608	0	0	0	0	0	0	0	0	0	0	0	1	0	0	0	0	0	0	1	1	1	0	0	4	4	0	19
1	212611405	212611577	SINE/MIR	MIRb	DF00402989	0	0	0	0	0	0	0	0	0	0	0	1	0	0	0	0	0	0	1	1	1	0	0	4	4	0	19
5	115599675	115600914	LINE/L2	L2c	DF04111108	0	0	0	0	0	0	0	0	0	0	0	1	0	0	0	0	0	0	0	1	1	0	1	4	4	0	19
1	173511330	173516189	LINE/L1	L1PA8	DF00327039	0	0	0	0	0	0	0	0	0	0	0	1	1	0	0	0	0	0	1	0	1	0	0	4	4	0	19
8	105815923	105822017	LINE/L1	L1MA1	DF05061400	0	0	1	0	0	1	0	0	0	0	0	1	0	0	0	0	0	0	1	0	0	0	0	4	4	0	19
9	32442842	32442959	SINE/MIR	MIR	DF05199573	0	0	0	0	0	0	0	0	0	0	0	1	0	0	0	0	0	0	1	1	1	0	0	4	4	0	19
6	81743341	81744351	LINE/L1	L1MC3	DF04402074	0	0	1	0	0	0	0	0	0	0	0	1	0	0	0	0	0	0	1	0	0	0	1	4	4	0	19
17	58631185	58631459	SINE/Alu	AluSz6	DF02106334	0	0	0	0	0	0	0	1	0	0	0	1	0	0	0	0	0	0	0	1	1	0	0	4	4	0	19
16	31742175	31746983	LINE/L1	L1PA8A	DF01872511	0	0	0	0	0	0	0	0	0	0	0	1	0	0	0	0	0	0	1	1	0	0	1	4	4	0	19
3	114652593	114655237	LINE/L1	L1ME2	DF03409081	0	0	0	0	1	1	1	0	0	0	0	0	0	0	0	0	0	0	0	1	0	0	0	4	4	0	19
7	105007690	105007985	SINE/Alu	AluSz6	DF04762843	0	0	0	0	0	0	0	0	0	0	0	0	0	0	0	0	0	0	1	1	1	0	1	4	4	0	19
2	101829759	101830320	LINE/L2	L2b	DF02638889	0	0	0	0	0	1	0	0	0	0	0	0	0	0	0	0	0	0	1	1	0	0	1	4	4	0	19
17	63742648	63742956	SINE/Alu	AluY	DF02118889	0	0	0	0	0	0	0	0	0	0	0	1	1	0	0	0	0	0	1	0	1	0	0	4	4	0	19
14	69781207	69781768	LTR/ERVL-MaLR	MLT1M	DF01538183	0	0	0	0	0	0	0	0	0	0	0	1	0	0	0	0	0	0	1	0	1	0	1	4	4	0	19
9	5792893	5795497	LINE/L1	L1MC2	DF05152988	0	0	1	0	0	1	0	0	0	0	0	1	0	0	0	0	0	0	0	-1	0	0	1	5	4	1	18
22	22587184	22587474	SINE/Alu	AluSc5	DF03123729	0	0	0	0	0	-1	0	0	0	0	1	0	1	0	0	0	0	0	1	0	1	0	0	5	4	1	18
13	51416277	51417449	LINE/L1	L1MB7	DF01334326	0	0	1	0	0	0	0	0	0	-1	0	1	0	0	0	0	0	0	0	1	0	0	1	5	4	1	18
12	119941217	119941512	SINE/Alu	AluSq	DF01236544	0	0	0	0	0	-1	0	0	0	0	0	1	1	0	0	0	0	0	1	0	1	0	0	5	4	1	18
10	70165291	70166249	DNA/TcMar-Tigger	Tigger1	DF00605773	0	0	0	0	-1	1	0	0	0	0	0	0	0	0	0	0	0	0	1	1	1	0	0	5	4	1	18
15	65615733	65617878	LINE/L1	L1PA6	DF01709187	0	0	0	0	-1	0	0	0	0	0	0	1	0	0	0	0	0	0	0	1	1	0	1	5	4	1	18
3	14161659	14163736	LINE/L1	L1MB5	DF03223968	0	0	0	0	-1	1	0	1	0	0	0	0	0	0	0	0	0	0	1	0	0	0	1	5	4	1	18
19	52059742	52061547	LTR/ERV1	HERV4_I-int	DF02427434	1	0	1	0	0	0	0	0	0	-1	0	0	1	0	0	1	0	0	0	0	0	0	0	5	4	1	18
14	60126376	60128930	LINE/L1	L1MB8	DF01518149	0	0	1	0	0	1	1	1	0	0	0	0	0	0	0	0	0	0	0	0	-1	0	0	5	4	1	18
6	31469593	31470768	LINE/L2	L2	DF04311541	0	0	0	0	-1	0	0	0	0	0	0	1	0	0	0	0	0	0	0	1	1	0	1	5	4	1	18
6	28747872	28748345	DNA/hAT-Charlie	MER1A	DF04305983	0	0	0	0	0	-1	0	0	0	0	0	1	1	0	0	0	0	0	1	0	1	0	0	5	4	1	18
13	42891733	42893448	LINE/L2	L2a	DF01316885	0	0	0	1	-1	0	0	0	0	0	0	1	0	0	0	0	0	0	0	1	0	0	1	5	4	1	18
5	97154171	97160200	LINE/L1	L1MA3	DF04080678	0	0	0	0	-1	0	0	0	0	0	0	1	1	0	0	0	0	0	1	0	1	0	0	5	4	1	18
1	155313034	155313316	DNA/hAT-Charlie	MER102a	DF00291011	0	0	1	0	-1	1	0	0	0	0	0	0	0	0	0	1	1	0	0	0	0	0	0	5	4	1	18
5	242196	242652	LTR/ERVK	MER9a3	DF03915087	0	0	0	0	0	-1	0	0	0	0	0	1	0	0	0	0	0	0	1	1	1	0	0	5	4	1	18
3	130961216	130962702	DNA/PiggyBac	Looper	DF03441539	0	0	1	0	0	-1	0	0	0	0	0	0	0	0	0	0	0	0	1	1	0	0	1	5	4	1	18
1	110955487	110956820	LINE/L2	L2	DF00243242	0	0	1	0	0	-1	0	0	0	0	0	0	0	0	0	0	0	0	1	1	0	0	1	5	4	1	18
6	126134073	126138257	LINE/L1	L1MA4	DF04480436	0	0	1	0	-1	0	0	0	0	0	0	1	0	0	0	0	0	0	1	0	1	0	0	5	4	1	18
6	27505827	27505909	tRNA	tRNA-Ser-TCY	DF04303253	0	0	0	0	0	-1	0	0	0	0	0	1	1	0	0	0	0	0	1	0	1	0	0	5	4	1	18
9	92835687	92836740	LINE/L1	L1ME1	DF05293773	0	0	0	0	-1	0	0	0	0	0	0	1	0	0	0	0	0	0	1	1	1	0	0	5	4	1	18
19	44184753	44188325	LINE/L1	L1MB2	DF02404214	1	0	-1	0	0	0	0	0	0	0	0	1	0	0	0	0	0	0	1	0	1	0	0	5	4	1	18
5	40711099	40712076	LINE/L1	L1ME2	DF03985386	1	0	0	0	1	0	0	0	0	0	0	1	0	0	0	0	0	0	0	1	-1	0	0	5	4	1	18
3	122725573	122726427	LINE/L1	L1MEg	DF03423888	0	0	1	0	-1	0	0	0	0	0	0	0	0	0	0	1	0	0	1	1	0	0	0	5	4	1	18
12	11219365	11223330	LINE/L1	L1PBa	DF01019636	0	0	1	0	0	-1	0	0	0	0	0	0	0	0	0	0	0	0	1	1	0	0	1	5	4	1	18
17	75204552	75204845	SINE/Alu	AluSx1	DF02144580	0	0	0	0	0	-1	0	0	0	0	0	1	1	0	0	0	0	0	1	0	1	0	0	5	4	1	18
4	176344248	176350255	LTR/ERVK	HERVK9-int	DF03889499	0	0	1	0	0	0	0	1	0	-1	0	0	0	0	0	0	0	0	1	1	0	0	0	5	4	1	18
8	70564753	70571418	LINE/L1	L1PB2	DF04995291	0	0	0	1	-1	1	0	0	0	0	0	1	0	0	0	0	0	0	0	0	0	0	1	5	4	1	18
6	31468195	31468884	LTR/ERVL	ERVL-E-int	DF04311537	0	0	0	0	-1	0	0	1	0	0	0	1	0	0	0	0	0	0	0	1	0	0	1	5	4	1	18
3	9377910	9379138	LINE/CR1	CR1_Mam	DF03212218	0	0	0	0	0	0	0	0	0	0	-1	1	1	0	0	0	0	0	1	1	0	0	0	5	4	1	18
3	121959116	121961860	LINE/L1	L1M1	DF03422238	0	0	0	0	-1	0	0	0	0	0	0	1	0	0	0	0	0	0	1	1	0	0	1	5	4	1	18
2	195743884	195749994	LINE/L1	L1PA3	DF02807920	0	0	1	0	-1	0	0	0	0	0	0	1	0	0	0	0	0	0	1	0	1	0	0	5	4	1	18
1	233063472	233064823	LINE/L1	L1MEd	DF00478856	0	0	1	0	0	1	0	0	0	0	-1	0	0	0	0	0	0	0	1	0	1	0	0	5	4	1	18
21	17454675	17454760	SINE/Alu	AluSp	DF03051887	0	0	0	0	0	-1	0	0	0	0	0	1	1	0	0	0	0	0	1	0	1	0	0	5	4	1	18
7	112477499	112478582	LINE/L1	HAL1	DF04776847	0	0	1	0	0	-1	0	0	0	0	0	1	0	0	0	0	0	0	0	0	1	0	1	5	4	1	18
2	101845390	101845712	DNA/TcMar-Tigger	Tigger3a	DF02638907	0	0	0	0	0	1	0	0	0	-1	1	0	0	0	0	0	0	0	1	1	0	0	0	5	4	1	18
X	74040610	74046981	LINE/L1	L1PA7	DF05732769	0	0	0	0	0	1	0	0	0	0	-1	0	0	0	0	0	0	0	1	0	1	0	1	5	4	1	18
1	61057626	61057914	SINE/Alu	AluSq2	DF00149090	0	0	0	0	0	-1	0	0	0	0	1	0	1	0	0	0	0	0	1	0	1	0	0	5	4	1	18
1	145843720	145844621	LINE/L1	L1MA4	DF00270457	1	0	0	0	1	0	1	0	0	0	0	0	0	0	0	0	0	0	0	-1	1	0	0	5	4	1	18
17	46162446	46163270	LINE/L2	L2b	DF02078591	0	0	1	0	0	1	0	0	0	-1	0	0	0	0	1	0	0	0	1	0	0	0	0	5	4	1	18
4	773377	775164	LTR/ERV1	LTR12E	DF03574196	1	0	1	0	0	0	-1	0	0	0	0	0	0	0	0	0	0	0	0	1	1	0	0	5	4	1	18
14	20613399	20613472	tRNA	tRNA-Pro-CCY	DF01445531	0	0	1	0	0	-1	0	0	0	0	0	1	0	0	0	0	0	0	1	1	0	0	0	5	4	1	18
5	14427255	14428160	LTR/Gypsy	LTR104_Mam	DF03937341	0	0	1	0	0	1	0	0	0	0	0	0	0	0	0	0	0	0	1	-1	0	0	1	5	4	1	18
2	197562512	197566502	LINE/L1	L1PA6	DF02811549	0	0	1	0	0	0	0	0	0	0	0	1	0	0	0	0	0	0	1	-1	1	0	0	5	4	1	18
5	128116899	128117599	LINE/L1	L1MC5	DF04132711	0	0	0	0	0	0	0	0	0	0	1	1	0	0	0	0	0	0	0	-1	0	1	1	5	4	1	18
18	2735087	2737383	LINE/L1	L1PA16	DF02166899	1	0	0	0	-1	0	0	1	0	0	0	0	0	0	0	0	0	0	0	1	1	0	0	5	4	1	18
5	173764139	173764434	SINE/Alu	AluSp	DF04229723	0	0	0	0	0	-1	0	0	0	0	1	1	1	0	0	0	0	0	1	0	0	0	0	5	4	1	18
10	73777865	73778162	SINE/Alu	AluSz6	DF00614541	0	0	1	0	1	1	0	0	0	0	0	-1	0	0	0	0	0	0	0	0	0	1	0	5	4	1	18
12	68836287	68836539	LINE/L1	HAL1	DF01124896	0	0	0	0	0	1	0	0	0	0	0	1	0	0	0	0	0	0	1	-1	0	0	1	5	4	1	18
6	57071114	57074116	LTR/ERVK	HERVK22-int	DF04364486	0	0	1	0	0	0	0	0	0	0	0	1	0	0	0	0	0	0	1	-1	1	0	0	5	4	1	18
6	28802800	28802870	tRNA	tRNA-Ala-GCA	DF04306117	0	0	1	0	0	-1	0	0	0	1	0	0	1	0	1	0	0	0	0	0	0	0	0	5	4	1	18
15	65687003	65688957	LINE/L1	L1MB7	DF01709350	0	0	0	0	0	-1	0	0	0	0	1	1	0	0	0	0	0	0	0	1	0	0	1	5	4	1	18
3	160492917	160494117	LINE/L2	L2	DF03497777	0	0	1	0	0	0	0	0	0	0	0	1	0	0	0	0	0	0	0	-1	1	0	1	5	4	1	18
19	57303578	57303913	LINE/L1	L1M4	DF02441330	1	0	0	0	1	0	0	0	0	-1	0	0	0	0	0	1	0	0	0	1	0	0	0	5	4	1	18
21	17595317	17596836	LINE/L1	L1ME4b	DF03052256	0	0	0	0	-1	0	0	0	0	0	0	1	0	0	1	0	0	0	0	1	0	0	1	5	4	1	18
13	49158536	49164598	LINE/L1	L1P2	DF01329647	0	0	0	0	0	1	0	0	0	-1	0	0	0	0	0	0	0	0	1	1	0	0	1	5	4	1	18
9	120843499	120843792	SINE/Alu	AluJb	DF05356305	1	0	0	0	0	0	1	1	0	0	-1	0	0	0	0	0	0	0	0	1	0	0	0	5	4	1	18
2	60938686	60939981	LINE/L1	L1MC4	DF02564847	0	0	0	0	-1	0	0	0	0	0	0	1	0	0	0	0	0	0	1	0	1	0	1	5	4	1	18
10	843724	844106	LINE/RTE-X	L4_A_Mam	DF00406971	0	0	1	0	0	-1	0	0	0	0	0	0	0	0	0	0	0	0	0	1	1	0	1	5	4	1	18
19	770560	770855	SINE/Alu	AluSx	DF02301659	0	0	0	0	0	-1	0	0	0	0	1	0	1	0	0	0	0	0	1	0	1	0	0	5	4	1	18
9	3556882	3563337	LINE/L1	L1PA7	DF05148781	0	0	0	0	-1	1	0	0	0	0	0	0	0	0	0	0	0	0	1	1	0	0	1	5	4	1	18
1	168264567	168269780	LTR/ERVL	HERVL18-int	DF00317315	0	0	0	0	0	-1	0	0	0	0	0	0	1	0	0	0	0	0	0	1	1	0	1	5	4	1	18
6	32834080	32834674	LINE/L1	L1MB3	DF04314292	0	0	0	1	-1	1	0	0	0	0	0	0	0	0	0	1	0	0	0	0	0	0	1	5	4	1	18
17	38867174	38867494	SINE/Alu	AluSx3	DF02060353	0	0	0	0	0	-1	0	0	0	0	0	1	1	0	0	0	0	0	1	0	1	0	0	5	4	1	18
7	8038118	8039715	LINE/L1	L1PB4	DF04579025	0	0	-1	0	0	1	0	0	0	0	0	0	0	0	0	0	0	0	1	1	0	0	1	5	4	1	18
7	8034582	8038110	LINE/L1	L1PB4	DF04579024	0	0	-1	0	0	1	0	0	0	0	0	0	0	0	0	0	0	0	1	1	0	0	1	5	4	1	18
7	8032122	8034594	LINE/L1	L1M4	DF04579023	0	0	-1	0	0	1	0	0	0	0	0	0	0	0	0	0	0	0	1	1	0	0	1	5	4	1	18
12	6568946	6569238	SINE/Alu	AluSc	DF01010253	0	0	0	0	0	-1	0	0	0	0	0	1	1	0	0	0	0	0	1	0	1	0	0	5	4	1	18
13	51409688	51410930	LINE/L1	L1ME1	DF01334308	0	0	1	0	0	0	0	0	0	-1	0	1	0	0	0	0	0	0	0	1	0	0	1	5	4	1	18
19	8379912	8385647	LTR/ERV1	HERV9NC-int	DF02322976	0	0	0	0	0	-1	0	1	0	0	0	1	0	0	0	0	0	0	0	1	0	0	1	5	4	1	18
5	179825295	179825418	LINE/RTE-X	L4_C_Mam	DF04244431	0	0	1	0	-1	1	1	0	0	0	0	0	0	0	0	1	0	0	0	0	0	0	0	5	4	1	18
16	31771430	31776332	LINE/L1	L1PA10	DF01872542	0	0	0	0	-1	0	0	0	0	0	0	1	0	0	0	0	0	0	0	1	1	0	1	5	4	1	18
4	857116	858086	LINE/L1	L1MD2	DF03574357	0	0	0	0	-1	0	1	0	0	0	0	0	0	0	0	0	0	0	0	1	1	0	1	5	4	1	18
6	30211699	30212555	LINE/L1	L1MC3	DF04308789	0	0	0	0	0	1	0	0	0	0	0	-1	0	0	0	0	0	0	1	1	0	0	1	5	4	1	18
5	66098873	66101972	LINE/L1	L1PBa1	DF04023467	0	0	0	0	0	1	0	0	0	0	0	1	0	0	0	0	0	0	0	-1	1	0	1	5	4	1	18
11	47426985	47427272	SINE/Alu	AluY	DF00826947	0	0	0	0	0	-1	0	0	0	0	1	0	1	0	0	0	0	0	1	0	1	0	0	5	4	1	18
7	141769962	141776086	LINE/L1	L1PA4	DF04833339	0	0	0	0	0	0	0	0	0	-1	0	1	0	0	0	0	0	0	1	0	1	0	1	5	4	1	18
21	41453561	41454335	LTR/ERV1	MER4D	DF03098193	0	0	0	1	0	0	0	0	0	0	0	1	1	0	0	0	0	0	0	-1	0	0	1	5	4	1	18
1	222554880	222555841	LINE/L1	L1MA9	DF00457373	1	0	0	0	-1	0	1	0	0	0	0	0	0	0	0	1	0	0	0	1	0	0	0	5	4	1	18
7	42892781	42898898	LINE/L1	L1PB1	DF04642967	0	0	0	0	0	-1	0	0	0	0	0	1	1	0	0	0	0	0	1	0	1	0	0	5	4	1	18
1	109216633	109216920	SINE/Alu	AluJb	DF00239818	1	0	0	0	1	-1	0	0	0	0	0	0	0	0	0	1	0	0	0	1	0	0	0	5	4	1	18
6	28719704	28719775	tRNA	tRNA-Ala-GCA	DF04305917	0	0	0	0	0	-1	0	0	0	0	0	1	0	1	0	0	0	0	1	0	1	0	0	5	4	1	18
6	43616312	43616608	SINE/Alu	AluSg4	DF04339930	0	0	1	0	1	0	0	1	0	0	0	0	0	0	0	0	0	0	0	-1	0	0	1	5	4	1	18
2	101706084	101706875	LINE/L1	HAL1	DF02638686	0	0	0	0	0	1	0	0	0	-1	0	0	0	0	0	0	0	0	1	1	0	0	1	5	4	1	18
6	27295433	27295504	tRNA	tRNA-Gln-CAG	DF04302766	0	0	0	0	0	-1	0	0	0	0	0	1	1	0	0	0	0	0	1	0	1	0	0	5	4	1	18
9	33037412	33037700	SINE/Alu	AluJb	DF05200821	0	0	0	0	-1	0	0	0	0	0	0	1	1	0	0	0	0	0	0	1	0	0	1	5	4	1	18
22	28574398	28578392	LINE/L1	L1MA3	DF03138183	0	0	1	0	0	0	0	0	0	0	0	0	0	0	0	0	0	0	1	1	-1	0	1	5	4	1	18
6	26130679	26131253	LTR/ERVL-MaLR	MLT1A-int	DF04300187	0	0	0	1	0	0	-1	0	0	0	0	1	0	0	0	0	0	1	0	0	0	0	1	5	4	1	18
2	101261089	101261839	LINE/L1	L1ME3D	DF02637605	0	0	0	0	-1	0	0	0	0	0	0	0	0	0	0	0	0	0	1	1	1	0	1	5	4	1	18
7	141752118	141756103	LTR/ERVK	HERVK-int	DF04833305	0	0	0	0	0	0	0	0	0	-1	0	1	0	0	0	0	0	0	1	0	1	0	1	5	4	1	18
11	68460147	68460219	tRNA	tRNA-Ala-GCY	DF00862358	0	0	0	0	0	-1	0	0	0	0	0	0	1	0	0	0	0	0	1	1	1	0	0	5	4	1	18
11	59561742	59562091	LTR/ERV1	MER34A1	DF00841198	0	0	0	0	0	-1	0	0	0	0	0	1	1	0	0	0	0	0	1	0	1	0	0	5	4	1	18
1	173758361	173764882	LINE/L1	L1PB1	DF00327542	0	0	0	0	-1	1	0	0	0	0	0	1	0	0	0	0	0	0	1	1	0	0	0	5	4	1	18
14	67273120	67276113	LINE/L1	L1PA5	DF01532628	0	0	-1	0	0	0	0	0	0	0	0	1	0	0	0	0	0	0	1	0	1	0	1	5	4	1	18
4	82836400	82837069	LINE/L1	L1MA3	DF03726835	1	0	1	0	0	1	0	0	0	-1	0	0	0	0	0	0	0	0	0	1	0	0	0	5	4	1	18
X	68524523	68530929	LINE/L1	L1PA7	DF05721298	0	0	1	0	-1	0	0	0	0	0	0	0	0	0	-1	0	0	0	1	1	0	0	1	6	4	2	17
5	179622137	179622178	SINE/MIR	MIR3	DF04243870	0	0	0	0	-1	1	1	1	0	0	0	0	0	0	0	0	0	0	-1	0	0	0	1	6	4	2	17
3	101858470	101858956	DNA/TcMar-Tigger	Tigger15a	DF03386738	0	0	0	0	-1	0	1	1	0	0	0	-1	0	0	0	0	0	0	1	1	0	0	0	6	4	2	17
2	60932312	60934736	LINE/L1	L1MA8	DF02564838	0	0	0	0	-1	-1	0	0	0	0	0	1	0	0	0	0	0	0	1	0	1	0	1	6	4	2	17
12	4358378	4360099	LINE/L1	L1MC3	DF01005685	0	0	1	0	1	-1	0	0	0	0	0	0	0	0	0	0	0	0	1	-1	0	1	0	6	4	2	17
1	219188112	219188628	LINE/L2	L2a	DF00450904	0	0	-1	0	-1	1	0	0	0	0	0	0	0	0	1	0	0	0	1	1	0	0	0	6	4	2	17
4	422355	423984	LINE/L1	L1M3a	DF03573616	1	0	0	0	-1	-1	0	0	0	0	0	1	1	0	0	0	0	0	0	0	1	0	0	6	4	2	17
2	159799166	159800229	LINE/L1	L1MC2	DF02745229	-1	0	0	0	0	0	-1	0	0	0	0	1	0	0	0	0	0	0	1	0	1	0	1	6	4	2	17
4	82831786	82833547	LINE/L1	L1PA7	DF03726826	1	0	0	0	-1	1	0	0	0	-1	0	0	0	0	1	0	0	0	0	1	0	0	0	6	4	2	17
19	12942760	12943042	SINE/Alu	AluSp	DF02336148	1	0	1	0	-1	0	0	0	0	0	0	-1	0	0	0	0	0	0	1	1	0	0	0	6	4	2	17
7	112473757	112474452	LINE/L1	L1MB5	DF04776840	0	0	0	0	-1	-1	0	0	0	0	0	1	0	0	0	0	0	0	0	1	1	0	1	6	4	2	17
X	41340985	41341284	SINE/Alu	AluSp	DF05676919	0	0	-1	0	-1	1	0	1	0	0	0	0	0	0	0	0	0	0	1	0	0	0	1	6	4	2	17
11	57847857	57853994	LINE/L1	L1PA6	DF00838029	0	0	0	0	0	-1	0	0	0	-1	0	1	0	0	0	0	0	0	1	0	1	0	1	6	4	2	17
16	46597422	46599730	DNA/TcMar-Tigger	Tigger1	DF01878845	1	0	0	0	0	0	0	0	0	1	0	-1	0	0	0	0	0	0	-1	1	0	0	1	6	4	2	17
19	5709207	5709507	SINE/Alu	AluSx1	DF02314792	0	0	1	0	0	-1	1	0	0	0	0	0	0	0	0	1	0	0	0	-1	1	0	0	6	4	2	17
17	38861683	38861755	tRNA	tRNA-Cys-TGY	DF02060332	0	0	0	0	0	-1	0	0	0	0	0	-1	1	0	0	0	0	0	1	1	1	0	0	6	4	2	17
7	30604235	30605322	LINE/CR1	L3	DF04619035	1	0	1	0	0	-1	0	0	0	0	0	0	0	0	0	1	0	0	-1	1	0	0	0	6	4	2	17
8	145058168	145061837	LTR/ERVK	HERVK13-int	DF05141991	0	0	0	0	0	-1	0	0	0	0	0	1	1	0	0	0	0	0	1	-1	1	0	0	6	4	2	17
20	34099502	34100008	LTR/ERVL	MER21C	DF02963452	1	0	1	0	-1	0	1	0	0	0	0	0	0	0	0	0	0	0	-1	1	0	0	0	6	4	2	17
X	44999657	45004033	LTR/ERV1	HERVIP10FH-int	DF05685019	0	0	-1	0	0	0	0	0	0	-1	1	1	0	0	0	0	0	0	1	0	1	0	0	6	4	2	17
6	26273516	26273804	SINE/Alu	AluSq10	DF04300513	0	0	0	0	0	-1	0	0	0	-1	0	1	1	0	0	0	0	0	1	0	0	0	1	6	4	2	17
7	8065017	8068069	LINE/L1	L1PA15	DF04579081	0	0	-1	0	-1	1	0	0	0	0	0	0	0	0	0	0	0	0	1	1	0	0	1	6	4	2	17
4	102741891	102745354	LTR/ERVL	HERVL-int	DF03762255	0	0	0	0	-1	1	0	0	0	0	0	1	1	0	0	0	0	0	1	-1	0	0	0	6	4	2	17
4	102737782	102741897	LINE/L1	L1PB1	DF03762254	0	0	0	0	-1	1	0	0	0	0	0	1	0	0	0	0	0	0	1	-1	1	0	0	6	4	2	17
3	15391508	15397625	LINE/L1	L1PA4	DF03226933	0	0	1	0	-1	-1	0	0	0	0	0	1	0	0	0	0	0	0	0	0	1	0	1	6	4	2	17
1	41167720	41169616	LINE/L1	L1MA6	DF00101103	0	0	1	0	0	1	0	0	0	0	-1	-1	0	0	0	0	0	0	0	1	0	0	1	6	4	2	17
19	57296416	57297299	LINE/L1	L1M2	DF02441313	1	0	0	0	-1	1	0	0	0	-1	0	0	0	0	0	1	0	0	0	1	0	0	0	6	4	2	17
7	25116647	25117635	LINE/L2	L2	DF04608407	0	0	0	0	-1	0	0	0	0	0	0	1	1	0	0	0	0	0	1	-1	1	0	0	6	4	2	17
11	121312945	121314025	LINE/L1	L1ME2	DF00970431	0	0	1	0	0	-1	-1	0	0	0	1	0	0	0	0	1	0	0	0	1	0	0	0	6	4	2	17
1	219195690	219196505	LINE/L1	L1PA10	DF00450914	0	0	-1	0	-1	1	0	0	0	0	0	0	0	0	1	0	0	0	1	1	0	0	0	6	4	2	17
6	99411280	99411438	SINE/MIR	MIRc	DF04432143	0	0	-1	0	-1	1	0	0	0	0	1	0	0	0	0	1	0	0	0	1	0	0	0	6	4	2	17
1	20775013	20775323	DNA/TcMar-Tigger	Tigger3b	DF00045751	0	0	0	0	-1	1	1	0	0	0	0	-1	0	0	0	0	1	0	0	-1	0	1	0	7	4	3	16
7	112459065	112459235	SINE/Alu	AluJb	DF04776811	0	0	0	0	0	-1	1	0	0	-1	-1	1	0	0	0	0	0	0	0	1	0	0	1	7	4	3	16
4	49631298	49657170	Satellite	(GAATG)n	DF03671772	-1	0	0	0	0	-1	1	0	0	0	0	1	0	0	0	0	0	0	1	0	1	0	-1	7	4	3	16
11	121309121	121309459	LTR/ERVL-MaLR	MLT1J2	DF00970420	0	0	1	0	0	-1	-1	0	0	0	0	0	1	0	0	1	0	0	0	1	-1	0	0	7	4	3	16
16	70255914	70256102	SINE/MIR	MIRc	DF01931680	1	0	1	0	0	-1	1	0	0	0	0	0	0	0	0	0	0	0	-1	1	-1	0	0	7	4	3	16
10	32893792	32894389	LINE/L1	L1MC	DF00541290	0	1	1	0	0	1	-1	0	0	-1	0	0	0	0	0	-1	0	0	0	0	1	0	0	7	4	3	16
8	73056350	73061905	LINE/L1	L1PA5	DF04999513	0	0	1	0	-1	-1	-1	0	0	0	0	0	0	0	0	0	0	0	0	1	1	1	0	7	4	3	16
2	3542027	3543015	LINE/L1	HAL1M8	DF02450709	1	0	0	0	0	1	1	0	0	0	-1	-1	0	0	0	-1	0	0	0	0	1	-1	0	8	4	4	15
8	25510837	25512202	LINE/L1	L1ME1	DF04913339	-1	0	0	0	1	1	0	0	0	1	1	0	0	0	0	-1	0	0	0	-1	-1	0	0	8	4	4	15
1	35735938	35736235	SINE/Alu	AluSx	DF00087126	-1	0	0	0	0	-1	0	1	0	1	0	-1	0	0	0	-1	1	0	0	1	0	0	0	8	4	4	15
11	6485104	6487277	LINE/L2	L2b	DF00744611	1	0	1	0	-1	-1	-1	0	0	0	0	0	0	0	0	0	0	0	0	-1	1	0	1	8	4	4	15
1	219196505	219197966	LINE/L1	L1P3	DF00450915	0	0	-1	0	-1	1	0	0	0	0	0	0	0	0	1	0	0	0	1	1	-1	0	-1	8	4	4	15
9	5779200	5782046	LINE/L1	L1PA7	DF05152971	-1	0	1	-1	-1	1	0	0	0	0	0	1	0	0	0	-1	0	0	1	-1	0	0	0	9	4	5	14
1	35735426	35735720	SINE/Alu	AluSx	DF00087125	-1	0	0	0	0	-1	0	1	0	1	0	-1	0	0	0	-1	1	0	-1	1	0	0	0	9	4	5	14
1	10420220	10420475	LINE/L1	L1ME3D	DF00019957	-1	0	0	0	1	1	-1	0	0	1	-1	-1	0	0	0	1	0	0	0	0	0	0	-1	9	4	5	14
9	96895025	96897099	LTR/ERVL	ERVL-B4-int	DF05302186	0	0	0	0	-1	1	1	0	0	-1	0	-1	-1	0	1	0	1	0	0	-1	0	0	0	9	4	5	14
6	26546255	26547195	LINE/L1	L1ME3E	DF04301142	1	0	-1	0	1	-1	0	-1	0	1	1	-1	0	0	0	0	0	0	-1	-1	-1	0	0	11	4	7	12
X	101164882	101165846	LINE/L2	L2a	DF05774516	-1	1	1	0	1	-1	0	0	0	1	0	-1	0	0	0	-1	0	0	-1	-1	-1	-1	0	12	4	8	11
1	175103902	175107105	LTR/ERV1	HERV9NC-int	DF00330326	0	0	0	0	0	0	0	0	0	0	0	0	0	0	0	0	0	0	1	1	1	0	0	3	3	0	20
17	7667515	7667796	LTR/ERV1	MER52D	DF01997060	0	0	0	0	0	0	0	0	0	0	0	1	1	0	0	0	0	0	0	0	1	0	0	3	3	0	20
10	87931252	87932321	LINE/CR1	L3	DF00642878	0	0	0	0	0	1	0	0	0	0	0	0	0	0	0	0	0	0	0	1	0	0	1	3	3	0	20
17	7873254	7874604	LINE/L2	L2b	DF01997548	0	0	0	0	0	0	0	0	0	0	0	1	0	0	0	0	0	0	0	0	1	0	1	3	3	0	20
21	34173777	34176395	LINE/L1	L1ME1	DF03083550	0	0	1	0	0	0	0	0	0	0	0	0	0	0	0	0	0	0	0	0	1	0	1	3	3	0	20
4	143541862	143542155	SINE/Alu	AluSq2	DF03831774	0	0	0	0	0	0	0	0	0	0	0	1	0	0	0	0	0	0	1	1	0	0	0	3	3	0	20
5	40719090	40720453	LINE/L1	L1MB7	DF03985399	0	0	0	0	0	0	0	0	0	0	0	1	0	0	0	0	0	0	0	1	0	0	1	3	3	0	20
1	204383549	204384487	LINE/L2	L2a	DF00385678	0	0	0	0	0	0	0	0	0	0	0	1	0	0	0	0	0	0	1	0	1	0	0	3	3	0	20
1	162806977	162811387	LINE/L1	L1PA5	DF00306447	0	0	1	0	0	0	0	0	0	0	0	1	0	0	0	0	0	0	0	1	0	0	0	3	3	0	20
5	14425048	14425599	LINE/L1	L1MB3	DF03937337	0	0	1	0	0	1	0	0	0	0	0	0	0	0	0	0	0	0	0	0	0	0	1	3	3	0	20
1	151907385	151907656	LTR/ERV1	LTR76	DF00283722	0	0	0	0	0	0	0	1	0	0	1	0	0	0	0	1	0	0	0	0	0	0	0	3	3	0	20
17	75035539	75035831	SINE/Alu	AluSx3	DF02144095	0	0	0	0	0	0	0	0	0	0	0	1	0	0	0	0	0	0	1	0	1	0	0	3	3	0	20
19	48877546	48877840	SINE/Alu	AluSg	DF02418665	0	0	0	0	0	0	0	0	0	0	0	1	0	0	0	0	0	0	0	1	1	0	0	3	3	0	20
11	62841341	62841417	SINE/Alu	AluSc8	DF00848731	0	0	0	0	0	0	0	1	0	0	0	1	0	0	0	0	0	0	0	0	1	0	0	3	3	0	20
12	79726977	79730145	LINE/L1	L1MDa	DF01145142	0	0	0	0	0	0	0	0	0	0	0	1	0	0	0	0	0	0	1	0	1	0	0	3	3	0	20
6	32961231	32963266	LINE/L1	L1MA4	DF04314563	0	0	0	0	0	0	0	0	0	0	0	1	0	0	0	0	0	0	0	1	1	0	0	3	3	0	20
21	17807454	17808608	LTR/ERVL-MaLR	MSTA-int	DF03052664	0	0	0	0	0	0	0	0	0	0	0	1	0	0	0	0	0	0	0	1	0	0	1	3	3	0	20
3	178957442	178957740	SINE/Alu	AluSz6	DF03530570	0	0	1	0	0	0	0	0	0	0	0	1	0	0	0	0	0	0	1	0	0	0	0	3	3	0	20
3	178958407	178959563	LINE/L1	L1ME3C	DF03530574	0	0	1	0	0	0	0	0	0	0	0	1	0	0	0	0	0	0	0	0	0	0	1	3	3	0	20
X	136820626	136821126	DNA/TcMar-Tigger	Tigger2	DF05841963	0	0	0	0	0	0	0	0	0	0	0	1	0	0	0	0	0	0	1	0	1	0	0	3	3	0	20
6	111341590	111342050	LINE/L1	L1MEc	DF04454964	0	0	0	0	0	0	0	0	0	0	0	1	0	0	0	0	0	0	0	1	0	0	1	3	3	0	20
17	61716591	61718739	LINE/L1	L1MEc	DF02114045	0	0	0	0	0	0	0	0	0	0	0	0	0	0	0	0	0	0	1	1	1	0	0	3	3	0	20
1	151195885	151196195	SINE/Alu	AluYf1	DF00281997	0	0	0	0	0	0	0	0	0	0	0	0	1	0	0	0	0	0	1	0	1	0	0	3	3	0	20
10	89337394	89337697	SINE/Alu	AluSx	DF00645642	0	0	0	1	0	0	0	0	0	0	0	0	0	0	0	0	0	0	1	1	0	0	0	3	3	0	20
10	89341754	89341875	DNA/TcMar-Tigger	Tigger12c	DF00645646	0	0	0	0	0	0	0	0	0	0	0	0	1	0	0	0	0	0	1	1	0	0	0	3	3	0	20
6	126080389	126082123	LTR/ERVL	ERVL-E-int	DF04480332	0	0	1	0	0	0	0	0	0	0	0	1	0	0	0	0	0	0	1	0	0	0	0	3	3	0	20
3	179001636	179002921	LTR/ERV1	LTR49-int	DF03530683	0	0	1	0	0	0	0	0	0	0	0	1	0	0	0	0	0	0	0	0	0	0	1	3	3	0	20
3	179000861	179001635	LTR/ERV1	LTR1B	DF03530682	0	0	1	0	0	0	0	0	0	0	0	1	0	0	0	0	0	0	0	0	0	0	1	3	3	0	20
11	94118738	94125285	LTR/ERV1	HERV9-int	DF00917413	0	0	0	0	0	0	0	0	0	0	0	0	0	0	0	0	0	0	1	0	1	0	1	3	3	0	20
2	101902636	101902886	LTR/Gypsy	MamGypLTR1b	DF02638979	0	0	0	0	0	0	0	0	0	0	0	1	0	0	0	0	0	0	1	0	0	0	1	3	3	0	20
2	101900076	101900318	LINE/RTE-X	L4_B_Mam	DF02638972	0	0	0	0	0	0	0	0	0	0	0	1	0	0	0	0	0	0	1	0	0	0	1	3	3	0	20
15	49068554	49073474	LINE/L1	L1PA7	DF01674502	0	0	0	0	0	0	0	0	0	0	0	1	0	0	0	0	0	0	1	0	1	0	0	3	3	0	20
5	10621782	10622099	LTR/ERVL-MaLR	MLT1A0	DF03930894	0	0	0	0	1	0	0	0	0	0	0	0	0	0	0	0	0	0	1	1	0	0	0	3	3	0	20
22	36223264	36224186	LTR/ERVL	ERVL-E-int	DF03158472	0	0	0	0	0	0	0	0	0	0	0	0	1	0	0	0	0	0	1	0	1	0	0	3	3	0	20
X	102618914	102626033	LINE/L1	L1PA15	DF05777049	0	0	0	0	0	1	0	0	0	0	0	0	1	0	0	0	0	0	1	0	0	0	0	3	3	0	20
12	103952801	103953358	LINE/L2	L2a	DF01193345	0	0	1	0	0	0	0	0	0	0	0	0	1	0	0	0	0	0	0	1	0	0	0	3	3	0	20
2	197556453	197556894	LTR/ERVL-MaLR	MLT1D	DF02811533	0	0	0	0	0	0	0	0	0	0	0	1	0	0	0	0	0	0	1	0	0	0	1	3	3	0	20
1	35524711	35526256	LINE/L1	L1MA4A	DF00086575	0	0	1	0	1	0	0	0	0	0	0	0	0	0	0	0	0	0	0	1	0	0	0	3	3	0	20
9	124373631	124374412	LINE/L1	L1MB8	DF05364714	0	0	1	0	0	1	0	0	0	0	0	0	0	0	0	0	0	0	0	1	0	0	0	3	3	0	20
6	29739697	29740343	LINE/L1	HAL1	DF04307869	0	0	0	0	0	0	0	0	0	0	1	0	0	0	0	0	0	0	0	0	1	0	1	3	3	0	20
4	140269167	140269710	LTR/ERVL-MaLR	MLT1H1	DF03826039	1	0	1	0	0	0	0	0	0	0	1	0	0	0	0	0	0	0	0	0	0	0	0	3	3	0	20
15	65683252	65683747	LINE/L1	L1M5	DF01709339	0	0	0	0	0	0	0	0	0	0	0	1	0	0	0	0	0	0	0	1	0	0	1	3	3	0	20
7	130934577	130934833	LTR/ERVL	MLT2D	DF04810156	0	0	1	0	0	1	0	0	0	0	0	0	0	0	0	0	0	0	0	1	0	0	0	3	3	0	20
6	83189720	83190283	LINE/L1	L1MA9	DF04404601	1	0	0	0	0	0	0	0	0	0	0	0	0	0	0	0	0	0	0	1	0	0	1	3	3	0	20
9	32481581	32481884	SINE/Alu	AluSx	DF05199652	0	0	0	0	0	0	0	0	0	0	0	0	0	0	0	0	0	0	0	1	1	0	1	3	3	0	20
16	31763077	31764605	LTR/ERVK	HERVK22-int	DF01872531	0	0	0	0	0	0	0	0	0	0	0	1	0	0	0	0	0	0	1	0	0	0	1	3	3	0	20
4	168359220	168360256	LINE/L2	L2c	DF03875786	0	0	1	1	0	0	0	0	0	0	0	0	0	0	0	0	0	0	0	0	0	0	1	3	3	0	20
5	61173271	61174399	LTR/ERVL	ERV3-16A3_I-int	DF04014399	0	0	0	0	0	0	0	0	0	0	0	1	0	0	0	0	0	0	1	0	1	0	0	3	3	0	20
5	61172555	61173270	LTR/ERVL	ERV3-16A3_I-int	DF04014398	0	0	0	0	0	0	0	0	0	0	0	1	0	0	0	0	0	0	1	0	1	0	0	3	3	0	20
2	102162197	102164504	LINE/L1	L1MEc	DF02639519	0	0	0	0	0	1	0	0	0	0	0	0	0	0	0	0	1	0	1	0	0	0	0	3	3	0	20
1	204385485	204386738	LINE/L2	L2a	DF00385681	0	0	0	0	0	0	0	0	0	0	0	1	0	0	0	0	0	0	1	0	1	0	0	3	3	0	20
1	94162579	94164104	LTR/ERVL	HERVL-int	DF00212836	0	0	1	0	0	0	0	0	0	0	0	1	0	0	0	1	0	0	0	0	0	0	0	3	3	0	20
X	53362776	53363569	LTR/Gypsy	LTR104_Mam	DF05703148	0	0	0	0	0	0	0	0	0	0	0	1	1	0	0	0	0	0	0	0	1	0	0	3	3	0	20
5	140515546	140520941	LINE/L1	L1PA3	DF04157187	0	0	0	0	0	0	0	0	0	0	0	1	0	0	0	0	0	0	1	1	0	0	0	3	3	0	20
X	129419636	129423210	LINE/L1	L1PA7	DF05826492	0	0	1	0	0	0	0	0	0	0	0	1	0	0	0	0	0	0	0	0	1	0	0	3	3	0	20
X	129423211	129425677	LINE/L1	L1MA4A	DF05826493	0	0	1	0	0	0	0	0	0	0	0	1	0	0	0	0	0	0	0	0	1	0	0	3	3	0	20
3	146503479	146504045	LTR/ERVL	LTR101_Mam	DF03472031	0	0	0	0	0	0	0	0	0	0	0	1	1	0	0	0	0	0	0	0	0	0	1	3	3	0	20
3	119426519	119427829	LINE/L1	L1MA7	DF03417366	0	0	0	0	0	0	0	0	0	0	0	0	0	0	0	0	0	0	0	1	1	0	1	3	3	0	20
3	119427870	119428813	LINE/L1	L1MA7	DF03417368	0	0	0	0	0	0	0	0	0	0	0	0	0	0	0	0	0	0	0	1	1	0	1	3	3	0	20
6	29953754	29954153	LTR/ERVL-MaLR	MLT1F1	DF04308264	0	0	0	0	0	0	0	0	0	0	0	1	0	0	0	0	0	0	0	0	1	0	1	3	3	0	20
2	73721397	73727534	LINE/L1	L1PA3	DF02591684	0	0	0	0	0	0	0	0	0	0	0	1	0	0	0	0	0	0	1	0	1	0	0	3	3	0	20
12	15943741	15949844	LINE/L1	L1PA5	DF01029239	0	0	0	0	0	1	0	0	0	0	0	0	0	0	0	0	0	0	1	1	0	0	0	3	3	0	20
6	159606452	159608222	LINE/L1	L1M5	DF04543417	0	0	0	0	0	0	0	0	0	0	0	1	0	0	0	0	0	0	0	0	1	0	1	3	3	0	20
5	50179438	50190480	Satellite/centr	ALR/Alpha	DF03994581	0	0	1	0	0	0	0	1	0	0	0	0	0	0	0	0	0	0	1	0	0	0	0	3	3	0	20
X	41178417	41179604	LINE/L1	L1M3	DF05676484	0	0	0	0	0	0	0	0	0	0	0	1	0	0	0	0	0	0	0	1	0	0	1	3	3	0	20
5	50190782	50211308	Satellite/centr	ALR/Alpha	DF03994583	0	0	1	0	0	0	0	1	0	0	0	0	0	0	0	0	0	0	1	0	0	0	0	3	3	0	20
10	32001060	32001708	LINE/L1	HAL1	DF00539530	0	0	0	0	0	0	0	0	0	0	0	1	0	0	0	0	0	0	0	0	1	0	1	3	3	0	20
9	94216744	94222879	LINE/L1	L1PA5	DF05296385	0	0	0	0	0	0	0	0	0	0	0	1	0	0	0	0	0	0	1	0	1	0	0	3	3	0	20
21	14778902	14785063	LINE/L1	L1PA6	DF03047541	0	0	1	0	0	0	0	0	0	0	0	1	0	0	0	0	0	0	1	0	0	0	0	3	3	0	20
4	542501	546115	LINE/L1	L1M1	DF03573854	0	0	0	0	0	0	0	0	0	0	0	1	0	0	0	0	0	0	1	0	1	0	0	3	3	0	20
6	126211641	126216275	LINE/L1	L1MA3	DF04480559	0	0	1	0	0	0	0	0	0	0	0	1	0	0	0	0	0	0	1	0	0	0	0	3	3	0	20
3	178997188	178997975	LTR/ERV1	LTR1B	DF03530670	0	0	1	0	0	0	0	0	0	0	0	1	0	0	0	0	0	0	0	0	0	0	1	3	3	0	20
8	97730030	97730167	DNA/hAT-Charlie	Chap1_Mam	DF05044485	1	0	0	0	1	0	0	0	0	0	0	0	0	0	0	0	0	0	1	0	0	0	0	3	3	0	20
22	28783974	28784538	DNA/TcMar-Tigger	Tigger15a	DF03138772	0	0	0	0	0	0	0	0	0	0	0	0	0	0	0	0	0	0	1	1	0	0	1	3	3	0	20
19	6588011	6588372	LTR/ERVL	MER54A	DF02317358	0	0	0	0	1	0	0	0	0	0	0	0	0	0	0	0	0	0	0	1	0	0	1	3	3	0	20
2	101917270	101919282	LINE/L1	L1MD2	DF02639010	0	0	0	0	0	0	0	0	0	0	0	1	0	0	0	0	0	0	1	0	0	0	1	3	3	0	20
2	101921184	101921906	LINE/RTE-X	L4_B_Mam	DF02639014	0	0	0	0	0	0	0	0	0	0	0	1	0	0	0	0	0	0	1	0	0	0	1	3	3	0	20
1	213153898	213155855	LINE/L1	L1M1	DF00404235	0	0	0	0	0	0	0	0	0	0	0	0	0	0	0	0	0	0	1	1	0	0	1	3	3	0	20
10	58417781	58423844	LINE/L1	L1PA5	DF00582136	0	0	0	0	0	0	0	0	0	0	0	1	0	0	0	0	0	0	1	0	1	0	0	3	3	0	20
7	99686020	99689554	LINE/L1	L1PA4	DF04750606	0	0	0	0	0	0	0	0	0	0	0	1	0	0	0	0	0	0	1	0	1	0	0	3	3	0	20
9	114600182	114601140	LTR/ERVL-MaLR	THE1A-int	DF05341154	0	0	0	0	0	0	0	0	0	0	0	1	1	0	0	0	0	0	0	0	0	0	1	3	3	0	20
9	114601401	114602002	LTR/ERVL-MaLR	THE1A-int	DF05341156	0	0	0	0	0	0	0	0	0	0	0	1	0	0	0	0	0	0	0	0	1	0	1	3	3	0	20
7	131315123	131321596	LINE/L1	L1PA8	DF04811117	0	0	1	0	0	0	1	0	0	0	0	0	0	0	0	0	0	0	1	0	0	0	0	3	3	0	20
19	44196943	44197437	LINE/L1	L1ME3A	DF02404233	0	0	0	0	0	0	0	0	0	0	0	0	0	0	0	1	0	0	1	0	1	0	0	3	3	0	20
11	114533302	114539444	LINE/L1	L1PA4	DF00955770	0	0	0	0	0	0	0	0	0	0	0	1	0	0	0	0	0	0	1	0	1	0	0	3	3	0	20
6	26175175	26176024	LINE/L1	L1MEd	DF04300305	0	0	0	0	0	0	0	0	0	0	0	1	0	0	0	1	0	0	0	0	1	0	0	3	3	0	20
12	79495081	79496870	LINE/L1	L1PA7	DF01144639	0	0	1	0	0	0	0	0	0	0	0	1	0	0	0	0	0	0	0	0	1	0	0	3	3	0	20
7	12839545	12845712	LINE/L1	L1PA7	DF04586703	0	0	0	0	0	0	0	0	0	0	0	1	0	0	0	0	0	0	1	0	0	0	1	3	3	0	20
4	168458081	168458817	LINE/L1	L1PA10	DF03875962	0	0	1	1	0	0	0	0	0	0	0	0	0	0	0	0	0	0	0	0	0	0	1	3	3	0	20
1	155316499	155316809	SINE/Alu	AluSx1	DF00291021	0	0	1	0	0	0	0	0	0	0	0	0	0	0	0	1	1	0	0	0	0	0	0	3	3	0	20
21	34152472	34153917	LINE/L2	L2	DF03083505	0	0	1	0	0	0	0	0	0	0	0	0	0	0	0	0	0	0	0	0	1	0	1	3	3	0	20
21	8998962	8999444	LINE/CR1	L3	DF03042087	0	0	0	0	0	0	0	0	0	0	0	1	0	0	0	0	0	0	1	0	1	0	0	3	3	0	20
10	94634349	94640784	LINE/L1	L1PA6	DF00657532	0	0	0	0	0	0	0	0	0	0	0	1	0	0	0	0	0	0	1	0	1	0	0	3	3	0	20
9	32458629	32458883	LINE/L1	L1MD3	DF05199594	0	0	0	0	0	0	0	0	0	0	0	1	0	0	0	0	0	0	0	1	0	0	1	3	3	0	20
2	99271162	99276435	LTR/ERVK	HERVK9-int	DF02633586	0	0	0	0	0	0	0	0	0	0	0	1	0	0	0	0	0	0	1	0	1	0	0	3	3	0	20
2	196752640	196758334	LINE/L1	L1PA7	DF02809753	0	0	0	0	0	0	0	0	0	0	0	1	0	0	0	0	0	0	1	0	1	0	0	3	3	0	20
14	21259073	21259472	LINE/L2	L2c	DF01446869	0	0	0	0	0	1	0	0	0	0	0	0	0	0	0	0	0	0	1	1	0	0	0	3	3	0	20
3	130904107	130905699	LINE/L1	L1MC4a	DF03441460	0	0	1	0	0	0	0	0	0	0	0	0	0	0	0	0	0	0	0	1	0	0	1	3	3	0	20
5	91555393	91561531	LINE/L1	L1PA5	DF04071557	0	0	0	0	0	0	0	0	0	0	0	0	0	0	0	0	0	0	1	0	1	0	1	3	3	0	20
5	14442770	14442922	SINE/MIR	MIRc	DF03937362	0	0	1	0	0	1	0	0	0	0	0	0	0	0	0	0	0	0	0	0	0	0	1	3	3	0	20
1	89122169	89124355	LINE/L1	L1MC4a	DF00202654	0	0	0	0	0	1	0	1	0	0	0	0	0	0	0	0	0	0	0	0	0	0	1	3	3	0	20
2	108456968	108459745	LINE/L1	L1MA4A	DF02650697	0	0	0	0	0	1	0	0	0	0	0	0	0	0	0	0	0	0	1	0	1	0	0	3	3	0	20
1	50943825	50946081	LTR/ERVL	HERVL40-int	DF00123773	0	0	1	0	0	0	0	0	0	0	0	0	0	0	0	0	0	0	1	1	0	0	0	3	3	0	20
1	65461994	65468172	LINE/L1	L1PA6	DF00159402	0	0	0	0	0	1	0	0	0	0	0	1	0	0	0	0	0	0	0	0	0	0	1	3	3	0	20
4	82833717	82834034	DNA/TcMar-Tigger	MamRep137	DF03726827	1	0	0	0	0	1	0	0	0	0	0	0	0	0	0	0	0	0	0	1	0	0	0	3	3	0	20
X	84392825	84397774	LINE/L1	L1MA4A	DF05747930	0	0	0	0	0	0	0	0	0	0	0	1	0	0	0	0	0	0	1	0	0	0	1	3	3	0	20
4	120672807	120680471	LINE/L1	L1PB1	DF03792823	0	0	1	0	0	1	0	0	0	0	0	0	0	0	0	0	0	0	0	1	0	0	0	3	3	0	20
12	10692667	10694100	LINE/L1	L1MD	DF01018772	0	0	0	0	0	0	0	0	0	0	0	1	0	0	0	0	0	0	1	0	0	0	1	3	3	0	20
12	10690925	10691402	LTR/ERVL	MLT2B1	DF01018771	0	0	0	0	0	0	0	0	0	0	0	1	0	0	0	0	0	0	1	0	1	0	0	3	3	0	20
20	24944089	24948906	LINE/L1	L1PA7	DF02949583	0	0	0	0	0	0	0	0	0	0	0	1	0	0	0	0	0	0	0	0	1	0	1	3	3	0	20
7	104983446	104983620	SINE/MIR	MIRb	DF04762795	0	0	0	0	0	0	0	0	0	0	0	0	0	0	0	0	0	0	1	1	0	0	1	3	3	0	20
7	104984937	104985024	DNA/hAT-Charlie	Charlie4a	DF04762796	0	0	0	0	0	0	0	0	0	0	0	0	0	0	0	0	0	0	1	1	0	0	1	3	3	0	20
7	104981765	104981990	LINE/L1	HAL1	DF04762792	0	0	0	0	0	0	0	0	0	0	0	0	0	0	0	0	0	0	1	1	0	0	1	3	3	0	20
21	46211633	46212021	LINE/L1	L1MC5a	DF03106235	0	0	1	0	0	0	0	0	0	0	0	0	0	0	0	1	0	0	0	0	0	0	1	3	3	0	20
15	78859432	78859715	SINE/Alu	AluSc	DF01739542	0	0	0	0	0	0	0	0	0	0	0	0	1	0	0	0	0	0	1	0	1	0	0	3	3	0	20
17	43348634	43349626	LTR/ERVK	LTR13	DF02071193	0	0	0	0	0	0	0	0	0	0	0	1	0	0	0	0	0	0	0	1	1	0	0	3	3	0	20
17	8484514	8485489	LINE/L1	L1MB7	DF01999078	0	0	1	0	0	0	0	1	0	0	0	0	0	0	0	0	0	0	0	0	0	0	1	3	3	0	20
4	124582830	124587941	LINE/L1	L1PA8A	DF03799552	0	0	1	0	0	0	0	0	0	0	0	1	0	0	0	0	0	0	0	0	0	0	1	3	3	0	20
12	57500855	57501401	LINE/L2	L2b	DF01103256	0	0	0	0	0	0	0	0	0	0	0	1	0	0	0	1	0	0	0	1	0	0	0	3	3	0	20
7	91851256	91854437	LINE/L1	L1PA17	DF04735098	0	0	0	0	0	0	0	0	0	0	0	0	0	0	0	0	0	0	1	1	0	0	1	3	3	0	20
12	10553727	10554797	LINE/L1	L1MCc	DF01018507	0	0	0	0	0	0	0	0	0	0	0	1	0	0	0	0	0	0	1	0	1	0	0	3	3	0	20
20	63569746	63569846	SINE/MIR	MIRc	DF03036346	0	1	0	0	0	0	0	0	0	0	0	1	1	0	0	0	0	0	0	0	0	0	0	3	3	0	20
9	32505394	32505934	LINE/L1	L1ME3G	DF05199709	0	0	0	0	0	0	0	0	0	0	0	0	0	0	0	0	0	0	0	1	1	0	1	3	3	0	20
2	111130404	111131683	LINE/L1	L1MD2	DF02655848	0	0	0	0	0	0	0	0	0	0	0	1	0	0	1	0	0	0	0	0	0	0	1	3	3	0	20
9	19416927	19418852	LINE/L1	L1PA7	DF05177479	0	0	1	0	0	0	0	0	0	0	0	1	0	0	0	0	0	0	1	0	0	0	0	3	3	0	20
17	43324163	43325133	LTR/ERVK	LTR13	DF02071176	0	0	0	0	0	0	0	0	0	0	0	1	0	0	0	0	0	0	0	1	1	0	0	3	3	0	20
14	100373507	100373823	DNA/TcMar-Tigger	MamRep137	DF01604153	0	0	0	0	0	1	0	0	0	0	0	0	0	0	0	0	0	0	0	1	0	0	1	3	3	0	20
15	65686227	65686564	LINE/L1	L1MB7	DF01709347	0	0	0	0	0	0	0	0	0	0	0	1	0	0	0	0	0	0	0	1	0	0	1	3	3	0	20
9	19355210	19356024	LINE/L1	L1M5	DF05177331	0	0	0	0	0	0	0	0	0	0	0	1	0	0	0	0	0	0	1	0	1	0	0	3	3	0	20
12	265745	266515	LINE/L1	L1MC4a	DF00996911	0	0	0	0	0	0	0	0	0	0	0	1	0	0	0	0	0	0	1	0	0	0	1	3	3	0	20
11	85454164	85460665	LINE/L1	L1PA15	DF00900958	0	0	0	0	0	0	0	0	0	0	0	1	0	0	0	0	0	0	1	0	1	0	0	3	3	0	20
21	17769754	17776204	LINE/L1	L1PA7	DF03052619	0	0	0	0	0	0	0	0	0	0	0	1	0	0	0	0	0	0	0	0	1	0	1	3	3	0	20
7	99583606	99588230	Satellite	SATR2	DF04750415	0	0	0	0	0	0	0	0	0	0	0	1	1	0	0	0	0	0	0	0	0	0	1	3	3	0	20
19	21198012	21206673	LTR/ERV1	HERV15-int	DF02358829	0	0	0	0	0	0	0	0	0	0	0	1	0	0	0	0	0	0	1	0	1	0	0	3	3	0	20
17	82453201	82454041	Retroposon/SVA	SVA_A	DF02159645	0	0	0	0	1	0	0	1	0	0	0	0	0	0	0	0	0	0	0	1	0	0	0	3	3	0	20
22	39308456	39308653	SINE/MIR	MIR	DF03166807	0	0	0	0	0	0	0	0	0	0	0	1	1	0	0	0	0	0	0	0	1	0	0	3	3	0	20
7	26177337	26177588	SINE/Alu	AluSz	DF04610452	0	0	0	0	0	0	0	0	0	0	0	1	0	0	0	0	0	0	1	0	0	0	1	3	3	0	20
7	26179023	26179182	LTR/ERV1	LTR78	DF04610454	0	0	0	0	0	0	0	0	0	0	0	1	0	0	0	0	0	0	0	1	0	0	1	3	3	0	20
7	26179223	26179516	SINE/Alu	AluJb	DF04610455	0	0	0	0	0	0	0	0	0	0	0	1	0	0	0	0	0	0	1	0	0	0	1	3	3	0	20
7	26179551	26179728	SINE/Alu	AluJb	DF04610456	0	0	0	0	0	0	0	0	0	0	0	1	0	0	0	0	0	0	0	1	0	0	1	3	3	0	20
7	26180766	26180871	DNA/TcMar-Tigger	X6b_DNA	DF04610459	0	0	0	0	0	0	0	0	0	0	0	1	0	0	0	0	0	0	0	1	0	0	1	3	3	0	20
1	155624467	155626665	LTR/ERV1	HERV17-int	DF00291969	0	0	0	0	0	0	0	0	0	0	0	1	0	0	0	0	0	0	0	0	1	0	1	3	3	0	20
3	146443081	146448276	LINE/L1	L1M1	DF03471948	0	0	0	0	0	0	0	0	0	0	0	1	0	0	0	0	0	0	1	0	0	0	1	3	3	0	20
10	94737791	94740999	LINE/L1	L1PA15	DF00657689	0	0	0	0	0	0	0	0	0	0	0	1	0	0	0	0	0	0	1	0	1	0	0	3	3	0	20
5	58446447	58447029	LTR/ERV1	LTR12E	DF04009626	0	0	0	0	0	0	0	0	0	0	0	1	1	0	0	0	0	0	1	0	0	0	0	3	3	0	20
7	65403932	65406832	LTR/ERV1	HUERS-P3-int	DF04677800	0	0	0	0	0	0	0	0	0	0	0	1	0	0	0	0	0	0	1	0	1	0	0	3	3	0	20
7	118201289	118201525	LTR/ERVL-MaLR	MLT1K	DF04786617	0	0	0	0	0	0	0	0	0	0	0	0	1	0	0	1	0	0	0	0	1	0	0	3	3	0	20
10	78096079	78099306	LINE/L1	L1PA7	DF00623633	0	0	0	0	0	0	0	0	0	0	0	1	0	0	0	0	0	0	1	0	1	0	0	3	3	0	20
3	134117542	134124506	LINE/L1	L1PB4	DF03447607	0	0	1	0	0	0	0	0	0	0	0	0	0	0	0	0	0	0	0	0	1	0	1	3	3	0	20
8	89673069	89678273	LINE/L1	L1PA5	DF05028838	0	0	0	0	0	0	0	0	0	0	0	0	0	0	0	0	0	0	1	1	0	0	1	3	3	0	20
8	89678285	89684515	LINE/L1	L1PA11	DF05028839	0	0	0	0	0	0	0	0	0	0	0	0	0	0	0	0	0	0	1	1	0	0	1	3	3	0	20
20	19885384	19885689	SINE/Alu	AluSx	DF02940834	0	0	0	0	0	0	0	0	0	0	1	0	1	0	0	0	0	0	1	0	0	0	0	3	3	0	20
11	117976166	117977097	LTR/Gypsy	LTR104_Mam	DF00962958	0	0	0	1	0	0	0	0	0	0	0	0	0	0	0	0	0	0	0	1	0	0	1	3	3	0	20
6	159655216	159657370	LINE/L1	L1PBa	DF04543547	0	0	0	0	0	0	0	0	0	0	0	1	0	0	0	0	0	0	0	0	1	0	1	3	3	0	20
3	178980192	178981500	LINE/L1	L1M2	DF03530628	0	0	1	0	0	0	0	0	0	0	0	1	0	0	0	0	0	0	0	0	0	0	1	3	3	0	20
9	32490093	32490391	SINE/Alu	AluSx	DF05199671	0	0	0	0	0	0	0	0	0	0	0	0	0	0	0	0	0	0	1	1	0	0	1	3	3	0	20
3	113710260	113712179	LINE/L1	L1ME1	DF03407331	0	0	0	0	0	0	0	0	0	0	0	1	1	0	0	0	0	0	0	0	1	0	0	3	3	0	20
6	2286243	2292694	LINE/L1	L1PA7	DF04251854	0	0	1	0	0	0	1	0	0	0	0	0	0	0	0	0	0	0	0	1	0	0	0	3	3	0	20
4	168229687	168233865	LINE/L1	L1PB1	DF03875567	0	0	0	0	0	0	0	0	0	0	0	0	0	0	0	0	0	0	1	1	0	0	1	3	3	0	20
6	111477271	111477972	LINE/L2	L2b	DF04455202	0	0	0	0	0	1	0	0	0	0	0	0	0	0	0	0	0	0	0	1	0	0	1	3	3	0	20
1	78161480	78164097	LINE/L1	L1PA6	DF00183186	0	0	0	0	0	0	0	0	0	0	0	1	0	0	0	0	0	0	1	0	1	0	0	3	3	0	20
1	78158703	78161484	LINE/L1	L1PA6	DF00183185	0	0	0	0	0	0	0	0	0	0	0	1	0	0	0	0	0	0	1	0	1	0	0	3	3	0	20
12	41973166	41979334	LINE/L1	L1PA3	DF01070743	0	0	0	0	0	0	0	0	0	0	0	1	0	0	0	0	0	0	1	0	1	0	0	3	3	0	20
2	37637537	37638009	LTR/ERVL-MaLR	MLT1D	DF02519660	0	0	0	0	0	0	0	0	0	0	0	1	1	0	0	0	0	0	0	0	0	0	1	3	3	0	20
4	139444411	139447658	LTR/ERVL	HERVL-int	DF03824348	0	0	0	0	0	0	0	0	0	0	0	1	0	0	0	0	0	0	1	0	1	0	0	3	3	0	20
12	10656654	10660474	LTR/ERV1	MER41-int	DF01018692	0	0	0	0	0	0	0	0	0	0	0	1	0	0	0	0	0	0	1	0	1	0	0	3	3	0	20
6	111435230	111437854	LINE/L1	L1MA4	DF04455122	0	0	0	0	0	1	0	0	0	0	0	0	0	0	0	0	0	0	0	1	0	0	1	3	3	0	20
5	40700262	40703620	LINE/L1	L1PA14	DF03985381	0	0	0	0	0	0	0	0	0	0	0	1	0	0	0	0	0	0	0	1	0	0	1	3	3	0	20
5	40823528	40823963	LTR/ERVL	LTR41	DF03985650	0	0	0	0	0	0	0	0	0	0	0	1	1	0	0	0	0	0	0	0	1	0	0	3	3	0	20
2	197573081	197574585	LTR/ERVL-MaLR	THE1B-int	DF02811564	0	0	0	0	0	0	0	0	0	0	0	1	0	0	0	0	0	0	1	0	1	0	0	3	3	0	20
21	29312317	29312902	LINE/L1	L1ME1	DF03073288	0	0	1	0	0	1	0	0	0	0	0	0	0	0	0	0	0	0	0	1	0	0	0	3	3	0	20
10	89022319	89022836	LTR/ERVL-MaLR	MLT1K	DF00645012	0	0	0	0	0	0	0	0	0	0	0	1	0	0	0	0	0	0	1	0	0	0	1	3	3	0	20
10	89023812	89024211	LTR/ERVL	LTR16C	DF00645016	0	0	0	0	0	0	0	0	0	0	0	1	0	0	0	0	0	0	1	0	0	0	1	3	3	0	20
5	151029564	151029784	SINE/MIR	MIRc	DF04180223	0	0	0	0	0	0	0	0	0	0	0	1	0	0	0	0	0	0	0	1	0	0	1	3	3	0	20
16	31729606	31731585	LINE/L1	L1MA9	DF01872491	0	0	0	0	0	0	0	0	0	0	0	1	0	0	0	0	0	0	0	1	0	0	1	3	3	0	20
8	78828850	78830673	LINE/L1	L1MA6	DF05009552	0	0	0	0	1	0	0	0	0	0	0	1	0	0	0	0	0	0	0	0	0	0	1	3	3	0	20
3	146510938	146511304	LTR/ERVL-MaLR	MLT1A1	DF03472050	0	0	0	0	0	0	0	0	0	0	0	1	1	0	0	0	0	0	0	0	0	0	1	3	3	0	20
8	70581514	70582128	LINE/L1	L1MB7	DF04995317	1	0	0	0	0	1	0	0	0	0	0	0	0	0	0	0	0	0	0	0	0	0	1	3	3	0	20
6	29961020	29962275	LTR/ERVL	MER21-int	DF04308276	0	0	0	0	0	0	0	0	0	0	0	1	0	0	0	0	0	0	0	0	1	0	1	3	3	0	20
8	23066304	23066625	LINE/L1	L1MEc	DF04908166	0	0	1	0	0	0	0	0	0	0	0	0	0	0	0	0	0	0	1	0	0	0	1	3	3	0	20
13	48979217	48979453	LINE/L2	L2d	DF01329305	0	0	0	0	0	0	0	0	0	0	1	0	0	0	0	0	0	0	1	1	0	0	0	3	3	0	20
10	89047154	89047673	LTR/ERVL	LTR16D	DF00645060	0	0	0	0	0	0	0	0	0	0	0	1	0	0	0	0	0	0	1	0	0	0	1	3	3	0	20
4	26421602	26422611	LINE/L1	L1MC5a	DF03627712	1	0	1	0	0	1	0	0	0	0	0	0	0	0	0	0	0	0	0	0	0	0	0	3	3	0	20
1	185199236	185201713	LINE/L1	L1PA7	DF00350584	0	0	0	0	0	0	0	0	0	0	0	1	0	0	0	0	0	0	0	1	1	0	0	3	3	0	20
12	121018893	121019110	LTR/ERVL-MaLR	MLT1A0	DF01239679	0	0	0	0	0	0	0	0	0	0	0	0	1	0	0	0	0	0	1	1	0	0	0	3	3	0	20
6	144041192	144047335	LINE/L1	L1PA6	DF04513126	0	0	0	0	0	0	0	0	0	0	0	1	0	0	0	0	0	0	0	1	1	0	0	3	3	0	20
11	14268266	14268701	LTR/ERVL-MaLR	MSTB2	DF00760461	0	0	0	0	0	0	0	0	0	0	0	1	0	0	0	0	0	0	0	1	1	0	0	3	3	0	20
17	8192221	8192623	LTR/ERVL-MaLR	MLT1K	DF01998294	0	0	0	0	0	0	0	0	0	0	0	1	1	0	0	0	0	0	0	0	1	0	0	3	3	0	20
2	44958629	44958956	SINE/Alu	AluSx3	DF02534854	0	0	0	0	0	0	0	0	0	0	0	1	1	0	0	0	0	0	1	0	0	0	0	3	3	0	20
2	175125836	175126341	LINE/L2	L2a	DF02773404	0	0	0	0	0	0	0	0	0	0	0	0	0	0	0	0	0	0	0	1	1	0	1	3	3	0	20
6	159580424	159581710	LINE/L2	L2a	DF04543353	0	0	0	0	0	0	0	0	0	0	0	1	0	0	0	0	0	0	0	0	1	0	1	3	3	0	20
4	88451260	88452961	LTR/ERV1	HERV4_I-int	DF03738131	0	0	0	0	0	0	0	0	0	0	0	1	0	0	0	0	0	0	1	0	0	0	1	3	3	0	20
6	111432007	111434334	LINE/L1	L1MA4	DF04455118	0	0	0	0	0	1	0	0	0	0	0	0	0	0	0	0	0	0	0	1	0	0	1	3	3	0	20
14	24443124	24443797	LINE/L2	L2	DF01453176	0	0	0	0	0	0	0	0	0	0	0	0	0	0	0	0	0	0	1	0	1	0	1	3	3	0	20
14	69792173	69793077	LINE/L1	L1ME3Cz	DF01538201	0	0	0	0	0	0	0	0	0	0	0	1	0	0	0	0	0	0	1	0	1	0	0	3	3	0	20
5	10620670	10621542	LINE/L1	L1MC4	DF03930892	0	0	0	0	0	0	0	0	0	0	0	0	0	0	0	0	0	0	1	1	0	0	1	3	3	0	20
3	121685915	121686526	LINE/RTE-X	L4_A_Mam	DF03421714	0	0	0	0	0	0	0	0	0	0	0	1	0	0	0	0	0	0	0	1	0	0	1	3	3	0	20
18	46779152	46782322	LTR/ERVL	HERVL-int	DF02239399	0	0	0	0	0	0	0	0	0	0	0	1	0	0	0	0	0	0	0	0	1	0	1	3	3	0	20
17	43356532	43357143	LTR/ERVL	LTR18B	DF02071204	0	0	0	0	0	0	0	0	0	0	0	1	0	0	0	0	0	0	0	1	1	0	0	3	3	0	20
17	43352789	43353346	LTR/ERV1	PRIMA41-int	DF02071200	0	0	0	0	0	0	0	0	0	0	0	1	0	0	0	0	0	0	0	1	1	0	0	3	3	0	20
17	43354954	43355913	LTR/ERVK	LTR5_Hs	DF02071202	0	0	0	0	0	0	0	0	0	0	0	1	0	0	0	0	0	0	0	1	1	0	0	3	3	0	20
15	49341651	49343463	LINE/L1	L1PA15-16	DF01675021	1	0	1	0	0	1	0	0	0	0	0	0	0	0	0	0	0	0	0	0	0	0	0	3	3	0	20
16	71937918	71939464	LTR/ERV1	MER52A	DF01935632	0	0	0	0	0	0	0	0	0	0	0	1	0	0	0	0	0	0	0	0	1	0	1	3	3	0	20
3	112211222	112217359	LINE/L1	L1PA5	DF03404557	0	0	1	0	0	0	0	0	0	0	0	1	0	0	0	0	0	0	0	0	1	0	0	3	3	0	20
2	171769599	171770211	LINE/L1	L1MD3	DF02766548	0	0	1	0	0	0	0	0	0	0	0	1	0	0	0	0	0	0	0	0	1	0	0	3	3	0	20
3	182997509	183000983	LINE/L1	L1PA13	DF03538789	0	0	0	0	0	0	0	0	0	0	0	1	0	0	0	0	0	0	0	0	1	0	1	3	3	0	20
4	168278850	168279968	DNA/TcMar-Tigger	Tigger7	DF03875643	0	0	0	0	0	0	0	0	0	0	0	0	0	0	0	0	0	0	1	1	0	0	1	3	3	0	20
5	58445586	58446450	LTR/ERV1	LTR12E	DF04009625	0	0	0	0	0	0	0	0	0	0	0	1	1	0	0	0	0	0	1	0	0	0	0	3	3	0	20
11	27158763	27158890	SINE/Alu	AluYi6_4d	DF00785760	0	0	0	0	0	0	0	0	0	0	1	0	0	0	0	0	0	0	1	0	1	0	0	3	3	0	20
1	50886384	50892492	LINE/L1	L1PA5	DF00123652	0	0	1	0	0	0	0	0	0	0	0	0	0	0	0	0	0	0	1	1	0	0	0	3	3	0	20
2	61867932	61868067	LINE/L2	L2	DF02567414	0	0	0	0	0	0	0	0	0	0	0	1	0	0	0	0	0	0	1	0	1	0	0	3	3	0	20
12	121018587	121018891	SINE/Alu	AluSx3	DF01239678	0	0	0	0	0	0	0	0	0	0	0	0	1	0	0	0	0	0	1	1	0	0	0	3	3	0	20
5	40703932	40706491	LINE/L1	L1PA14	DF03985383	0	0	0	0	0	0	0	0	0	0	0	1	0	0	0	0	0	0	1	0	0	0	1	3	3	0	20
6	126505699	126511668	LINE/L1	L1PA8	DF04481023	0	0	0	0	0	0	0	0	0	0	0	1	0	0	0	0	0	0	1	0	1	0	0	3	3	0	20
X	74145863	74149757	LINE/L1	L1PA13	DF05732908	0	0	0	0	0	1	0	0	0	0	0	0	0	0	0	0	0	0	0	1	0	0	1	3	3	0	20
11	85556933	85558953	LINE/L1	L1PA16	DF00901122	0	0	0	0	0	0	0	0	0	0	0	1	0	0	0	0	0	0	1	0	1	0	0	3	3	0	20
15	73525187	73526633	LINE/L1	L1ME2	DF01727496	0	0	0	0	0	0	0	0	0	0	0	1	0	0	0	0	0	0	0	0	1	0	1	3	3	0	20
9	33040414	33040706	SINE/Alu	AluSx4	DF05200824	0	0	0	0	0	0	0	0	0	0	0	1	1	0	0	0	0	0	0	0	1	0	0	3	3	0	20
2	65198457	65200839	LINE/L1	L1M1	DF02574489	0	0	0	0	0	0	0	0	0	0	0	0	0	0	0	0	0	0	1	0	1	0	1	3	3	0	20
4	145148999	145149451	LTR/ERVL-MaLR	MLT1C2	DF03834381	0	0	0	0	0	0	0	0	0	0	0	1	0	0	0	0	0	0	0	1	0	0	1	3	3	0	20
10	7750001	7750194	LTR?	MamRep605	DF00419460	0	0	0	0	0	0	0	0	0	0	0	1	0	0	0	0	0	0	1	0	1	0	0	3	3	0	20
9	37170572	37171158	DNA/hAT-Tag1	hAT-1_Mam	DF05210593	0	0	1	0	0	0	0	0	0	0	0	0	0	0	1	0	0	0	0	1	0	0	0	3	3	0	20
13	51432000	51432205	LINE/L2	L2d	DF01334355	0	0	0	0	0	0	0	0	0	0	0	1	0	0	0	0	0	0	0	1	0	0	1	3	3	0	20
8	86498810	86501217	LINE/L1	L1PA16	DF05023628	0	0	0	0	0	1	0	0	0	0	0	1	0	0	0	0	0	0	0	1	0	0	0	3	3	0	20
16	14285893	14285964	tRNA	tRNA-Thr-ACG	DF01822686	0	0	0	0	0	1	0	0	0	0	0	0	0	0	0	0	0	0	0	1	1	0	0	3	3	0	20
2	98963168	98967742	LINE/L1	L1PREC2	DF02632954	0	0	0	0	0	0	0	0	0	0	0	0	0	0	0	0	0	0	1	0	1	0	1	3	3	0	20
3	161275267	161277427	LINE/L1	L1PB1	DF03499337	0	0	0	0	0	0	0	0	0	0	0	1	0	0	0	0	0	0	0	0	1	0	1	3	3	0	20
13	79425404	79427332	LINE/L1	L1ME4b	DF01381991	0	0	0	0	0	0	0	0	0	0	0	0	0	0	0	1	0	0	1	0	1	0	0	3	3	0	20
2	101898975	101899177	LINE/RTE-X	L4_B_Mam	DF02638967	0	0	0	0	0	0	0	0	0	0	0	1	0	0	0	0	0	0	1	0	0	0	1	3	3	0	20
3	158853661	158856683	LINE/L1	L1PB3	DF03494642	0	0	0	0	0	0	0	0	0	0	0	1	0	0	0	0	0	0	1	0	0	0	1	3	3	0	20
19	49495310	49495607	SINE/Alu	AluSp	DF02420420	0	0	0	0	0	0	0	0	0	0	0	1	1	0	0	0	0	0	0	0	1	0	0	3	3	0	20
19	49495614	49495933	SINE/Alu	AluSq2	DF02420421	0	0	0	0	0	0	0	0	0	0	0	1	1	0	0	0	0	0	0	0	1	0	0	3	3	0	20
6	26323089	26323289	DNA/hAT-Charlie	MER5A	DF04300623	0	0	0	0	0	0	0	0	0	0	0	1	0	0	0	0	0	0	1	0	1	0	0	3	3	0	20
13	59926287	59928901	LINE/L1	L1M2	DF01348749	0	0	1	0	0	0	0	0	0	1	0	0	0	0	0	0	0	0	0	1	0	0	0	3	3	0	20
5	58451799	58452896	LINE/L2	L2c	DF04009635	0	0	0	0	0	1	0	0	0	0	0	1	1	0	0	0	0	0	0	0	0	0	0	3	3	0	20
12	19561328	19561821	LTR/ERVL-MaLR	MLT1H-int	DF01035569	0	0	1	0	0	0	0	0	0	0	0	1	0	0	0	0	0	0	0	0	0	0	1	3	3	0	20
11	201708	202704	LTR/ERVK	LTR5B	DF00733803	0	0	1	1	0	0	0	0	0	0	0	0	0	0	0	0	0	0	0	0	0	0	1	3	3	0	20
6	34999214	35000262	LTR/ERV1	Harlequin-int	DF04319575	0	0	0	0	0	0	0	0	0	0	0	1	0	0	0	0	0	0	1	1	0	0	0	3	3	0	20
1	173736896	173738196	LINE/L1	L1PB1	DF00327500	0	0	0	0	0	0	0	0	0	0	0	1	0	0	0	0	0	0	0	1	1	0	0	3	3	0	20
8	80527175	80527474	SINE/Alu	AluSp	DF05013179	0	0	0	0	0	0	0	0	0	0	0	0	0	0	0	0	0	0	0	1	1	0	1	3	3	0	20
3	108655512	108661647	LINE/L1	L1PA4	DF03398278	0	0	0	0	0	0	0	0	0	0	0	0	0	0	0	0	0	0	1	1	1	0	0	3	3	0	20
4	87153642	87155720	LINE/L1	L1MA4A	DF03735289	0	0	0	0	0	0	0	0	0	0	0	1	0	0	0	0	0	0	0	1	0	0	1	3	3	0	20
17	7500203	7500492	SINE/Alu	AluSx1	DF01996627	0	0	0	0	0	0	0	1	0	0	0	1	0	0	0	0	0	0	0	0	0	0	1	3	3	0	20
4	112465478	112469114	LTR/ERVL	HERVL-int	DF03779001	0	0	0	0	0	0	0	0	0	0	0	1	0	0	0	0	0	0	0	0	1	0	1	3	3	0	20
1	110942452	110943280	LINE/L2	L2a	DF00243220	0	0	0	0	0	0	0	0	0	0	0	1	0	0	0	0	0	0	1	1	0	0	0	3	3	0	20
10	18586249	18587015	LTR/ERV1	LTR12B	DF00511593	0	0	0	0	0	0	0	0	0	0	0	1	0	0	0	0	0	0	1	0	1	0	0	3	3	0	20
7	26169816	26169945	SINE/Alu	FLAM_C	DF04610432	0	0	0	0	0	0	0	0	0	0	0	1	0	0	0	0	0	0	0	1	0	0	1	3	3	0	20
7	26171749	26171866	SINE/Alu	AluJr	DF04610439	0	0	0	0	0	0	0	0	0	0	0	1	0	0	0	0	0	0	1	0	0	0	1	3	3	0	20
11	83155781	83156073	SINE/Alu	AluSc	DF00896329	0	0	0	0	0	0	0	0	0	0	0	0	1	0	0	0	0	0	1	0	1	0	0	3	3	0	20
6	126453098	126457558	LINE/L1	L1PA15	DF04480928	0	0	0	0	0	0	0	0	0	0	0	1	0	0	0	0	0	0	1	0	1	0	0	3	3	0	20
3	146501597	146501976	LTR/ERVL-MaLR	MLT1A1	DF03472026	0	0	0	0	0	0	0	0	0	0	0	1	1	0	0	0	0	0	0	0	0	0	1	3	3	0	20
7	139103425	139104111	LINE/L1	L1ME3Cz	DF04827048	0	0	0	0	0	0	0	0	0	0	1	0	0	0	0	0	0	0	0	1	0	0	1	3	3	0	20
3	122695682	122695906	RC/Helitron	Helitron1Na_Mam	DF03423838	0	0	0	0	0	0	0	0	0	0	1	0	0	0	0	0	0	0	0	1	0	0	1	3	3	0	20
15	56555441	56559103	LINE/L1	L1MB1	DF01689342	0	0	0	0	0	0	0	0	0	0	0	1	0	0	0	0	0	0	1	1	0	0	0	3	3	0	20
15	56561416	56567575	LINE/L1	L1PA6	DF01689349	0	0	0	0	0	0	0	0	0	0	0	1	0	0	0	0	0	0	1	1	0	0	0	3	3	0	20
2	55238944	55239494	LINE/L1	L1MC4	DF02554830	0	0	0	0	0	0	0	0	0	0	0	1	1	0	0	0	0	0	0	0	1	0	0	3	3	0	20
16	50757946	50758860	LINE/L2	L2a	DF01888354	0	0	0	0	0	0	0	0	0	0	0	1	0	0	0	0	0	0	0	1	0	0	1	3	3	0	20
16	50759966	50761277	LINE/L1	L1ME4b	DF01888357	0	0	1	0	0	0	0	0	0	0	0	0	0	0	0	0	0	0	0	1	0	0	1	3	3	0	20
11	116850270	116850700	LINE/L2	L2d2	DF00960410	0	0	0	0	0	0	0	0	0	0	0	1	0	0	0	0	0	0	0	0	1	0	1	3	3	0	20
11	33124732	33125256	LINE/L1	L1MEd	DF00797635	0	0	1	0	0	0	0	0	0	0	0	0	0	0	0	0	0	0	1	0	1	0	0	3	3	0	20
22	38741859	38742167	SINE/Alu	AluSz6	DF03165347	0	0	0	0	1	0	0	0	0	0	0	0	0	0	0	0	0	0	0	1	0	0	1	3	3	0	20
22	38741626	38741711	SINE/MIR	MIRb	DF03165345	0	0	0	0	1	0	0	0	0	0	0	0	0	0	0	0	0	0	0	1	1	0	0	3	3	0	20
3	161318716	161322816	LINE/L1	L1M1	DF03499426	0	0	0	0	0	0	0	0	0	0	0	1	0	0	0	0	0	0	1	0	1	0	0	3	3	0	20
7	32858184	32859994	LINE/L1	L1MEc	DF04623569	0	0	0	0	0	0	0	0	0	0	0	1	0	0	0	0	0	0	0	0	1	0	1	3	3	0	20
1	154051514	154053416	LTR/ERVK	HERVK9-int	DF00287941	0	0	0	0	0	0	0	0	0	0	0	1	0	0	0	0	0	0	1	0	1	0	0	3	3	0	20
3	122708613	122709051	LINE/L1	L1MEf	DF03423857	0	0	0	1	0	0	0	0	0	0	0	0	0	0	0	0	0	0	0	1	0	0	1	3	3	0	20
17	16020130	16020539	LINE/L1	L1ME3Cz	DF02016389	0	0	1	0	0	0	0	0	0	0	0	1	0	0	0	0	0	0	0	0	1	0	0	3	3	0	20
6	85644896	85645197	SINE/Alu	AluY	DF04408644	0	0	0	0	0	0	0	0	0	0	0	1	0	0	0	0	0	0	1	0	1	0	0	3	3	0	20
6	111449094	111450199	LINE/L1	L1ME1	DF04455149	0	0	0	0	0	1	0	0	0	0	0	0	0	0	0	0	0	0	0	1	0	0	1	3	3	0	20
5	40811239	40812184	LINE/L1	L1MC3	DF03985607	0	0	0	0	0	0	0	0	0	0	0	1	0	0	0	0	0	0	1	0	1	0	0	3	3	0	20
10	89421535	89421687	SINE/MIR	MIR3	DF00645819	0	0	0	0	0	0	0	0	0	0	0	0	0	0	0	0	0	0	1	1	1	0	0	3	3	0	20
9	3657019	3660043	LINE/L1	L1MA4A	DF05148947	0	0	0	0	0	0	0	0	0	0	0	0	0	0	0	0	0	0	1	0	1	0	1	3	3	0	20
2	101915978	101917269	LINE/L1	L1MD2	DF02639009	0	0	0	0	0	0	0	0	0	0	0	1	0	0	0	0	0	0	1	0	0	0	1	3	3	0	20
2	101911962	101912914	LINE/L1	L1MB2	DF02639000	0	0	0	0	0	0	0	0	0	0	0	1	0	0	0	0	0	0	1	0	0	0	1	3	3	0	20
19	34748987	34750587	LINE/L1	L1M4c	DF02379316	0	0	0	0	0	0	0	0	0	0	0	1	1	0	0	0	0	0	0	0	1	0	0	3	3	0	20
11	59130869	59132503	LTR/ERVL-MaLR	THE1D-int	DF00840426	0	0	0	0	0	1	0	0	0	0	0	0	0	0	0	0	0	0	0	0	1	0	1	3	3	0	20
13	49000002	49001070	LINE/L1	L1M3	DF01329358	0	0	0	0	0	0	0	0	0	0	0	0	0	0	0	0	0	0	1	1	0	0	1	3	3	0	20
1	213146725	213150269	LINE/L1	L1MA1	DF00404226	0	0	0	0	0	1	0	0	0	0	0	0	0	0	0	0	0	0	1	1	0	0	0	3	3	0	20
3	157121461	157122000	LINE/RTE-X	L4_C_Mam	DF03491606	0	0	0	0	0	0	0	0	0	0	0	1	0	0	0	0	0	0	1	0	0	0	1	3	3	0	20
3	36979518	36980259	LINE/L1	L1MA4	DF03268150	0	0	0	0	0	0	0	0	0	0	0	1	0	0	0	0	0	0	1	0	1	0	0	3	3	0	20
6	110701262	110701571	SINE/Alu	AluYm1	DF04453277	0	0	0	0	0	0	0	0	0	0	1	1	1	0	0	0	0	0	0	0	0	0	0	3	3	0	20
6	110701575	110701759	LINE/L1	L1ME3G	DF04453278	0	0	0	0	0	0	0	0	0	0	0	1	1	0	0	0	0	0	1	0	0	0	0	3	3	0	20
1	204235123	204240742	LTR/ERVL	HERVL-int	DF00385408	0	0	0	0	0	1	0	0	0	0	0	0	0	0	0	0	0	0	1	0	1	0	0	3	3	0	20
18	74970258	74971822	LTR/ERVL-MaLR	THE1A-int	DF02292348	0	0	0	1	0	0	0	0	0	0	0	0	0	0	0	0	0	1	0	1	0	0	0	3	3	0	20
7	141878744	141881705	LINE/L1	L1P4a	DF04833513	0	0	0	0	0	0	0	0	0	0	0	1	0	0	0	0	0	0	1	0	0	0	1	3	3	0	20
4	88510816	88511687	LINE/L1	L1ME1	DF03738263	0	0	0	0	0	0	0	0	0	0	0	1	1	0	0	0	0	0	1	0	0	0	0	3	3	0	20
12	11314840	11320373	LINE/L1	L1PA4	DF01019778	0	0	0	0	0	0	0	0	0	0	0	0	0	0	0	0	0	0	1	1	1	0	0	3	3	0	20
19	32364327	32365524	LINE/L1	L1PB1	DF02373630	0	0	0	0	0	1	0	0	0	0	0	0	0	0	0	0	0	0	1	0	1	0	0	3	3	0	20
6	27837050	27837666	LTR/ERV1	MER51D	DF04304131	0	0	0	0	0	0	0	1	0	0	0	0	0	0	0	0	0	0	0	0	1	0	1	3	3	0	20
1	88872482	88873079	LINE/L1	L1M6	DF00202160	0	0	0	0	0	0	0	0	0	0	0	1	0	0	0	0	0	0	0	1	0	0	1	3	3	0	20
4	40505207	40505503	SINE/Alu	AluSx	DF03654786	0	0	0	0	0	0	0	0	0	0	1	1	1	0	0	0	0	0	0	0	0	0	0	3	3	0	20
12	108639034	108639150	LTR/ERVL-MaLR	MLT1O	DF01204935	0	0	1	0	0	0	0	0	0	0	0	1	0	0	0	0	0	0	0	0	0	0	1	3	3	0	20
22	38493108	38493190	DNA/hAT-Charlie	MER58A	DF03164607	0	0	0	0	0	1	0	0	0	0	0	0	0	0	0	0	0	0	0	1	1	0	0	3	3	0	20
1	42894460	42900794	LINE/L1	L1PB1	DF00105103	0	0	0	0	0	0	0	0	0	0	0	1	1	0	0	0	0	0	0	0	1	0	0	3	3	0	20
15	56935481	56937363	LINE/L1	L1PB1	DF01690163	0	0	0	0	0	1	0	0	0	0	0	0	0	0	0	0	0	0	1	1	0	0	0	3	3	0	20
10	59765313	59769598	LTR/ERV1	Harlequin-int	DF00584601	0	0	0	0	0	0	0	0	0	0	0	1	0	0	0	0	0	0	1	0	1	0	0	3	3	0	20
12	62610615	62610863	LINE/L1	L1MA7	DF01112092	0	0	0	0	0	0	0	0	0	0	0	1	0	0	0	0	0	0	1	0	0	0	1	3	3	0	20
3	158856654	158860166	LINE/L1	L1PB3	DF03494643	0	0	0	0	0	0	0	0	0	0	0	1	0	0	0	0	0	0	1	0	0	0	1	3	3	0	20
21	15899352	15902769	LINE/L1	L1MA2	DF03049419	0	0	0	0	0	0	0	0	0	0	0	1	0	0	0	0	0	0	0	0	1	0	1	3	3	0	20
15	66482093	66482336	LINE/L2	L2b	DF01711364	0	0	0	0	0	0	0	0	0	0	0	1	1	0	0	0	0	0	0	0	1	0	0	3	3	0	20
7	141822863	141825286	LINE/L1	L1M1	DF04833422	0	0	0	0	0	0	0	0	0	0	0	1	0	0	0	0	0	0	1	0	0	0	1	3	3	0	20
3	37372657	37374203	LTR/ERV1	HUERS-P1-int	DF03269040	0	0	1	0	0	0	0	0	0	0	0	1	0	0	0	0	0	0	1	0	0	0	0	3	3	0	20
3	37374541	37376185	LTR/ERVL-MaLR	MSTA-int	DF03269042	0	0	1	0	0	0	0	0	0	0	0	1	0	0	0	0	0	0	1	0	0	0	0	3	3	0	20
12	6467557	6468249	LTR/ERVL-MaLR	THE1A-int	DF01010024	0	0	0	0	0	0	0	0	0	0	0	1	0	0	0	0	0	0	1	1	0	0	0	3	3	0	20
3	132664692	132665290	LINE/L1	L1M6	DF03444778	1	0	1	0	0	0	0	0	0	0	0	0	0	0	0	0	0	0	0	1	0	0	0	3	3	0	20
6	158526258	158528888	LINE/L1	L1PA10	DF04541279	0	0	0	0	0	0	0	0	0	0	0	1	0	0	0	0	0	0	0	0	1	0	1	3	3	0	20
12	82344814	82346887	LTR/ERV1	ERV24_Prim-int	DF01149782	0	0	0	0	0	0	0	0	0	0	0	1	1	0	0	0	0	0	1	0	0	0	0	3	3	0	20
6	27546031	27546145	SINE/MIR	MIR	DF04303366	0	0	0	0	0	0	0	0	0	0	0	1	0	0	0	0	0	0	1	0	1	0	0	3	3	0	20
9	86148447	86156812	LTR/ERV1	HERV9-int	DF05268891	0	0	0	0	0	0	0	0	0	0	0	1	0	0	0	0	0	0	1	0	1	0	0	3	3	0	20
5	36848506	36853420	LINE/L1	L1PA6	DF03977907	0	0	0	0	0	0	0	0	0	0	0	1	0	0	0	0	0	0	1	0	1	0	0	3	3	0	20
9	32498018	32498550	LTR/ERV1	MER72	DF05199691	0	0	0	0	0	0	0	0	0	0	0	0	1	0	0	0	0	0	0	1	0	0	1	3	3	0	20
6	166348894	166351241	DNA/TcMar-Tigger	Tigger1	DF04555034	0	0	0	0	0	0	0	0	0	0	0	0	0	0	0	1	0	0	1	0	1	0	0	3	3	0	20
16	31195044	31195443	LINE/L1	L1MA7	DF01871306	0	0	0	0	0	0	0	0	0	0	0	1	0	0	0	0	0	0	0	0	1	0	1	3	3	0	20
3	158936521	158942584	LINE/L1	L1PB1	DF03494791	0	0	0	0	0	0	0	0	0	0	0	1	0	0	0	0	0	0	1	0	0	0	1	3	3	0	20
14	61686344	61688295	LINE/L1	L1MC2	DF01521203	0	0	0	0	0	0	0	0	0	0	0	1	0	0	0	0	0	0	1	0	0	0	1	3	3	0	20
2	162299807	162300161	LINE/L2	L2d	DF02749493	0	0	0	0	0	0	0	0	0	0	0	0	0	0	0	0	0	0	1	1	0	0	1	3	3	0	20
4	87005279	87006042	DNA/hAT-Charlie	Charlie1a	DF03735060	0	0	1	0	0	0	0	0	0	0	0	1	0	0	0	0	0	0	0	1	0	0	0	3	3	0	20
2	191002622	191003177	LINE/L1	L1M5	DF02799988	0	0	0	0	0	0	0	1	0	0	0	0	0	0	0	0	0	0	0	1	0	0	1	3	3	0	20
17	43333691	43334680	LTR/ERVK	LTR13	DF02071184	0	0	0	0	0	0	0	0	0	0	0	1	0	0	0	0	0	0	0	1	1	0	0	3	3	0	20
17	43332867	43333690	LTR/ERVK	HERVK13-int	DF02071183	0	0	0	0	0	0	0	0	0	0	0	1	0	0	0	0	0	0	0	1	1	0	0	3	3	0	20
17	43331854	43332731	LTR/ERVK	HERVK13-int	DF02071180	0	0	0	0	0	0	0	0	0	0	0	1	0	0	0	0	0	0	0	1	1	0	0	3	3	0	20
4	82838425	82838671	LINE/L2	L2	DF03726841	1	0	0	0	0	1	0	0	0	0	0	0	0	0	0	0	0	0	0	1	0	0	0	3	3	0	20
4	76961820	76962431	DNA/TcMar-Tigger	Tigger13a	DF03716355	0	0	0	0	0	1	0	0	0	0	0	0	0	0	0	0	0	0	0	1	0	0	1	3	3	0	20
13	28684135	28685530	LTR/ERV1	MER52A	DF01289832	0	0	0	0	0	0	0	0	0	0	0	1	1	0	0	0	0	0	1	0	0	0	0	3	3	0	20
6	159551557	159553193	LINE/L1	L1M1	DF04543299	0	0	0	0	0	0	0	0	0	0	0	1	0	0	0	0	0	0	0	0	1	0	1	3	3	0	20
3	139390458	139390747	SINE/Alu	AluSx1	DF03458554	0	0	0	0	0	0	0	0	0	0	0	1	0	0	0	0	0	0	1	0	1	0	0	3	3	0	20
3	139390752	139390777	SINE/MIR	MIRb	DF03458555	0	0	0	0	0	0	0	0	0	0	0	1	0	0	0	0	0	0	1	0	1	0	0	3	3	0	20
7	103351716	103352200	LINE/L2	L2-1_AMi	DF04759792	0	0	0	0	0	0	0	0	0	0	1	0	0	0	0	0	0	0	0	1	1	0	0	3	3	0	20
7	103351169	103351706	LTR/ERVL	MER68	DF04759791	0	0	0	0	0	0	0	0	0	0	0	0	0	0	0	0	0	0	1	1	1	0	0	3	3	0	20
1	236231908	236232355	LINE/L2	L2d	DF00485827	0	0	0	0	0	0	0	0	0	0	0	1	0	0	0	0	0	0	0	1	0	0	1	3	3	0	20
1	78631697	78632944	DNA/hAT-Charlie	Charlie1a	DF00184019	0	0	0	0	1	0	0	0	0	0	0	0	0	0	0	1	0	0	0	1	0	0	0	3	3	0	20
1	78624296	78625041	LINE/L1	L1M3	DF00184011	0	0	0	0	1	0	0	0	0	0	0	0	0	0	0	1	0	0	0	1	0	0	0	3	3	0	20
2	46583716	46584054	DNA/TcMar-Tigger	MamRep434	DF02538068	1	0	0	0	0	0	0	0	0	0	0	0	0	0	0	1	0	0	0	1	0	0	0	3	3	0	20
6	126559048	126564585	LINE/L1	L1PA7	DF04481089	0	0	0	0	0	0	0	0	0	0	0	1	0	0	0	0	0	0	1	0	1	0	0	3	3	0	20
7	26182342	26182635	SINE/Alu	AluSq4	DF04610462	0	0	0	0	0	0	0	0	0	0	0	1	0	0	0	0	0	0	0	1	0	0	1	3	3	0	20
3	88064282	88064841	LINE/L1	HAL1	DF03369478	0	0	0	0	0	0	0	0	0	0	0	0	0	0	0	0	0	0	1	1	0	0	1	3	3	0	20
1	236186350	236192792	LINE/L1	L1PA7	DF00485772	0	0	0	0	0	1	0	0	0	0	0	1	0	0	0	0	0	0	0	0	1	0	0	3	3	0	20
Y	11308880	11314126	Satellite	BSR/Beta	DF05897660	0	0	0	0	0	0	0	0	0	1	0	1	0	0	0	0	0	0	0	1	0	0	0	3	3	0	20
2	9558973	9559437	LTR/ERVL-MaLR	MLT1F	DF02461879	0	0	0	0	0	0	0	0	0	0	0	1	0	0	0	0	0	0	1	0	1	0	0	3	3	0	20
18	80150428	80150739	LINE/L2	L2b	DF02299957	0	0	1	0	0	0	0	0	0	0	0	1	0	0	0	0	0	0	0	0	1	0	0	3	3	0	20
6	63766894	63769235	LINE/L1	L1PA16	DF04372372	0	0	1	0	0	0	0	0	0	0	0	1	0	0	0	0	0	0	0	0	1	0	0	3	3	0	20
2	162283547	162283971	LINE/CR1	L3	DF02749471	0	0	0	0	0	0	0	0	0	0	0	0	0	0	0	0	0	0	1	1	0	0	1	3	3	0	20
2	162284863	162285784	LINE/CR1	L3	DF02749476	0	0	0	0	0	0	0	0	0	0	0	0	1	0	0	0	0	0	0	1	0	0	1	3	3	0	20
12	10698290	10698578	LINE/L2	L2a	DF01018783	0	0	0	0	0	0	0	0	0	0	0	1	0	0	0	0	0	0	1	0	1	0	0	3	3	0	20
X	77896072	77896377	SINE/Alu	AluSq	DF05738387	0	0	0	0	0	0	0	0	0	0	0	0	1	0	0	0	0	0	1	0	1	0	0	3	3	0	20
1	36196783	36197868	LTR/ERV1	LTR12C	DF00088353	0	0	1	0	0	0	0	0	0	0	0	0	0	0	0	0	0	0	0	0	1	0	1	3	3	0	20
6	111415622	111416029	LINE/L2	L2a	DF04455089	0	0	0	0	0	1	0	0	0	0	0	0	0	0	0	0	0	0	0	1	0	0	1	3	3	0	20
4	105860124	105866235	LINE/L1	L1PA5	DF03767481	0	0	0	0	0	0	0	0	0	0	0	1	0	0	0	0	0	0	1	0	1	0	0	3	3	0	20
19	47079617	47079908	SINE/Alu	AluSx3	DF02412813	0	0	0	0	0	0	0	0	0	0	0	1	0	0	0	0	0	0	1	0	1	0	0	3	3	0	20
21	17454974	17455282	SINE/Alu	AluJb	DF03051889	0	0	0	0	0	0	0	0	0	0	0	0	1	0	0	0	0	0	1	0	1	0	0	3	3	0	20
9	21074459	21075112	LTR/Gypsy?	LTR85a	DF05180579	0	0	0	0	0	0	0	0	0	0	0	0	1	0	0	0	0	0	0	1	0	0	1	3	3	0	20
5	50233195	50244209	Satellite/centr	ALR/Alpha	DF03994589	0	0	0	0	0	0	0	1	0	0	0	0	0	0	0	0	0	0	1	1	0	0	0	3	3	0	20
14	21194123	21194714	LINE/L1	L1MDa	DF01446736	0	0	0	0	0	0	0	0	0	0	0	1	1	0	0	0	0	0	0	0	0	0	1	3	3	0	20
12	19590311	19590794	LTR/ERVL	LTR33A	DF01035628	0	0	0	0	0	0	0	0	0	0	0	1	0	0	0	0	0	0	1	0	0	0	1	3	3	0	20
7	112479205	112479456	SINE/Alu	AluSp	DF04776849	0	0	0	0	0	0	0	0	0	0	0	1	0	0	0	0	0	0	0	0	1	0	1	3	3	0	20
12	104797962	104800984	LTR/ERV1	MER101-int	DF01195520	0	0	0	0	0	0	0	0	0	0	0	0	0	0	0	0	0	0	1	0	1	0	1	3	3	0	20
2	101838863	101839224	LINE/L2	L2b	DF02638900	0	0	0	0	0	0	0	0	0	0	0	0	0	0	0	0	0	0	1	1	0	0	1	3	3	0	20
2	101844953	101845172	LTR/ERVL-MaLR	MLT1C2	DF02638905	0	0	0	0	0	0	0	0	0	0	1	0	0	0	0	0	0	0	0	1	0	0	1	3	3	0	20
6	118421029	118426805	LINE/L1	L1P2	DF04467292	0	0	1	0	0	0	0	0	0	0	0	1	0	0	0	0	0	0	1	0	0	0	0	3	3	0	20
10	89413463	89413786	SINE/Alu	AluJb	DF00645801	0	0	0	0	0	0	0	0	0	0	1	0	1	0	0	0	0	0	1	0	0	0	0	3	3	0	20
21	34843940	34844228	DNA/hAT-Tip100	MamTip2b	DF03084893	0	1	0	0	0	1	0	0	0	0	0	0	0	0	0	0	0	1	0	0	0	0	0	3	3	0	20
2	152576573	152578232	LINE/L2	L2a	DF02732975	0	0	1	0	0	0	0	0	0	0	0	1	0	0	0	0	0	0	0	0	1	0	0	3	3	0	20
3	56606749	56612099	LINE/L1	L1PBa1	DF03309079	0	0	0	0	0	0	0	0	0	0	0	0	1	0	1	0	0	0	0	0	1	0	0	3	3	0	20
3	178951916	178952336	LTR/ERVL-MaLR	MSTC	DF03530552	0	0	1	0	0	0	0	0	0	0	0	1	0	0	0	0	0	0	0	0	0	0	1	3	3	0	20
4	102704964	102709038	LINE/L1	L1MA4A	DF03762199	0	0	0	0	0	1	0	0	0	0	0	1	0	0	0	0	0	0	1	0	0	0	0	3	3	0	20
6	27844444	27845202	DNA/hAT-Charlie	MER20B	DF04304146	0	0	0	0	0	0	0	0	0	0	0	1	0	0	0	0	0	0	0	0	1	0	1	3	3	0	20
15	44702090	44702993	LINE/L1	L1MA3	DF01666281	0	0	0	0	0	0	0	0	0	0	0	0	0	0	0	0	0	0	1	1	0	0	1	3	3	0	20
7	130919418	130919889	DNA/TcMar-Tigger	Tigger18a	DF04810127	0	0	1	0	0	1	0	0	0	0	0	0	0	0	0	0	0	0	0	1	0	0	0	3	3	0	20
21	43788798	43789099	SINE/Alu	AluSg	DF03102447	0	0	0	0	0	0	0	0	0	0	0	1	0	0	0	0	0	0	1	0	1	0	0	3	3	0	20
9	92257780	92257863	LINE/L2	L2c	DF05292601	0	0	0	0	0	0	0	0	0	0	0	0	0	0	0	1	0	0	0	1	1	0	0	3	3	0	20
2	101715017	101715405	LTR/ERVL-MaLR	MLT1B	DF02638706	0	0	0	0	0	0	0	0	0	0	0	0	0	0	0	0	0	0	1	1	0	0	1	3	3	0	20
15	88636822	88637037	LINE/L2	L2a	DF01760228	0	0	0	0	0	0	0	0	0	0	0	1	0	0	0	0	0	0	1	0	0	0	1	3	3	0	20
9	32434914	32435119	LINE/RTE-X	L4_A_Mam	DF05199559	0	0	0	0	0	0	0	0	0	0	0	0	0	0	0	0	0	0	1	1	1	0	0	3	3	0	20
17	35568570	35568832	LINE/L2	L2c	DF02052462	0	0	0	0	0	0	0	1	0	0	0	0	0	0	0	0	0	0	1	0	0	0	1	3	3	0	20
9	110240155	110241268	LINE/L2	L2b	DF05330847	0	0	0	0	0	0	0	0	0	0	0	0	1	0	0	0	0	0	0	0	1	0	1	3	3	0	20
2	61863727	61864650	LTR/ERVL	ERVL-int	DF02567399	0	0	0	0	0	0	0	0	0	0	0	1	0	0	0	0	0	0	1	0	1	0	0	3	3	0	20
3	146507601	146508095	LTR/ERVL-MaLR	MLT1A-int	DF03472043	0	0	0	0	0	0	0	0	0	0	0	1	1	0	0	0	0	0	0	0	0	0	1	3	3	0	20
8	23061434	23062146	LINE/L1	L1MB3	DF04908155	0	0	1	0	0	0	0	0	0	0	0	0	0	0	0	0	0	0	1	0	0	0	1	3	3	0	20
8	23058873	23059505	LINE/L1	L1MB3	DF04908151	0	0	1	0	0	0	0	0	0	0	0	1	0	0	0	0	0	0	0	0	0	0	1	3	3	0	20
2	226929940	226931654	LINE/L1	L1PB3	DF02905081	0	0	1	0	0	0	0	0	0	0	0	0	0	0	0	0	0	0	1	1	0	0	0	3	3	0	20
11	93708037	93711469	LINE/L1	L1MA3	DF00916533	0	0	0	0	0	1	0	0	0	0	0	1	0	0	1	0	0	0	0	0	0	0	0	3	3	0	20
17	64493136	64493434	SINE/Alu	AluJb	DF02120678	0	0	0	0	0	0	0	0	0	0	0	1	1	0	0	0	0	0	0	0	0	0	1	3	3	0	20
7	27855171	27856047	LINE/L1	L1PA7	DF04613642	0	0	0	0	0	0	0	0	0	0	0	1	0	0	0	0	0	0	0	1	1	0	0	3	3	0	20
2	162320689	162320870	LINE/L2	L2a	DF02749534	0	0	0	0	0	0	0	0	0	0	0	0	0	0	0	0	0	0	1	1	0	0	1	3	3	0	20
3	158895104	158896116	LTR/ERVL	ERVL-E-int	DF03494715	0	0	0	0	0	0	0	0	0	0	0	1	0	0	0	0	0	0	1	0	0	0	1	3	3	0	20
3	158892586	158894098	LTR/ERVL	ERVL-E-int	DF03494711	0	0	0	0	0	0	0	0	0	0	0	1	0	0	0	0	0	0	1	0	0	0	1	3	3	0	20
5	113076151	113080925	LINE/L1	L1PA5	DF04106838	0	0	0	0	0	1	0	0	0	0	0	1	0	0	0	0	0	0	0	0	1	0	0	3	3	0	20
17	7493180	7493891	LINE/L2	L2c	DF01996616	0	0	0	0	0	0	0	0	0	0	0	1	0	0	0	0	0	0	0	0	1	0	1	3	3	0	20
14	30624412	30625230	LINE/L2	L2a	DF01463214	0	0	0	0	0	0	0	0	0	0	0	1	0	0	0	0	0	0	0	1	1	0	0	3	3	0	20
19	50098957	50099087	SINE/Alu	AluYa5	DF02422185	0	0	0	0	0	0	0	0	0	0	0	0	1	0	0	0	0	0	1	0	1	0	0	3	3	0	20
13	49046857	49049708	LINE/L1	L1PB1	DF01329433	0	0	0	0	0	0	0	0	0	0	0	0	0	0	0	0	0	0	1	1	0	0	1	3	3	0	20
17	32394845	32395105	SINE/Alu	AluSg	DF02045083	0	0	0	0	0	0	0	0	0	0	0	1	0	0	0	0	0	0	1	0	1	0	0	3	3	0	20
3	157186041	157189247	LINE/L1	L1PA15	DF03491744	0	0	0	0	0	0	0	0	0	0	0	0	0	0	0	0	0	0	0	1	1	0	1	3	3	0	20
5	66092280	66092992	LTR/ERVL	HERVL40-int	DF04023448	0	0	0	0	0	1	0	0	0	0	0	1	0	0	0	0	0	0	0	0	0	0	1	3	3	0	20
1	185116658	185118092	LTR/ERVL	ERVL-E-int	DF00350426	0	0	0	0	0	0	0	0	0	0	0	1	0	0	0	0	0	0	1	0	0	0	1	3	3	0	20
1	36018731	36019755	LTR/ERV1	MER57A-int	DF00087902	0	1	0	0	0	0	0	0	0	0	0	0	0	0	0	0	0	0	0	1	0	0	1	3	3	0	20
11	121093366	121096587	LTR/ERVL	ERV3-16A3_I-int	DF00970068	0	0	0	0	0	0	0	0	0	0	0	1	0	0	0	0	0	0	1	0	1	0	0	3	3	0	20
14	21168720	21172381	LINE/L1	L1PREC2	DF01446676	0	0	0	0	0	0	0	0	0	0	0	1	1	0	0	0	0	0	1	0	0	0	0	3	3	0	20
6	134959590	134960224	LINE/L1	L1MEd	DF04496234	0	0	0	0	0	0	0	0	0	0	0	1	0	0	0	0	0	0	0	0	1	0	1	3	3	0	20
X	78158057	78160681	LINE/L1	L1PBa1	DF05739005	0	0	0	0	0	0	0	0	0	0	0	1	0	0	0	0	0	0	1	0	1	0	0	3	3	0	20
7	105001788	105002075	SINE/Alu	AluJr4	DF04762826	0	0	0	0	0	0	0	0	0	0	0	0	0	0	0	0	0	0	1	1	0	0	1	3	3	0	20
7	104999724	105000029	SINE/Alu	AluJb	DF04762824	0	0	0	0	0	0	0	0	0	0	0	0	0	0	0	0	0	0	1	1	1	0	0	3	3	0	20
7	139068736	139069234	LTR/ERVL	LTR69	DF04826947	0	0	0	0	0	0	0	1	0	0	0	0	1	0	0	0	0	0	0	1	0	0	0	3	3	0	20
13	38223850	38227810	LTR/ERV1	MER57A-int	DF01307756	0	0	1	0	0	0	0	0	0	0	0	0	0	0	0	0	0	0	0	1	0	0	1	3	3	0	20
15	76263325	76266621	LTR/ERVK	HERVK14-int	DF01733915	0	0	0	0	0	1	0	0	0	0	0	0	0	0	0	0	0	0	1	1	0	0	0	3	3	0	20
3	153211976	153213264	LINE/L1	L1MC4	DF03484419	0	0	0	0	0	0	0	0	0	0	0	1	0	0	0	0	0	0	1	0	0	0	1	3	3	0	20
11	14429804	14435078	LINE/L1	L1PA5	DF00760909	0	0	0	0	0	0	0	0	0	0	0	1	0	0	0	0	0	0	1	0	1	0	0	3	3	0	20
10	89414267	89414349	SINE/Alu	AluYh7	DF00645805	0	0	0	0	0	0	0	0	0	0	0	0	1	0	0	0	0	0	1	0	1	0	0	3	3	0	20
7	139062252	139062707	LINE/L2	L2a	DF04826927	0	0	0	0	0	0	0	0	0	0	0	0	1	0	0	0	0	0	0	1	0	0	1	3	3	0	20
15	57284511	57284825	DNA/hAT-Charlie	Charlie30b	DF01690848	0	0	0	0	0	1	0	0	0	0	0	1	0	0	0	0	0	0	0	1	0	0	0	3	3	0	20
12	19762973	19765732	LINE/L1	L1PA15	DF01035957	0	0	0	0	0	0	0	0	0	0	0	1	0	0	0	0	0	0	0	0	1	0	1	3	3	0	20
10	87942281	87943403	DNA/TcMar-Tigger	Tigger3b	DF00642895	0	0	0	0	0	1	0	0	0	0	0	0	0	0	0	0	0	0	1	1	0	0	0	3	3	0	20
10	87940692	87941206	LTR/ERVL-MaLR	MLT1K	DF00642892	0	0	0	0	0	0	0	0	0	0	0	0	0	0	1	0	0	0	1	1	0	0	0	3	3	0	20
9	132352694	132353247	LINE/L2	L2c	DF05385062	0	0	1	0	0	1	0	0	0	0	0	0	0	0	0	0	0	0	0	1	0	0	0	3	3	0	20
1	78651083	78651592	DNA/hAT-Charlie	MER1A	DF00184046	0	0	0	1	0	0	0	0	0	0	0	0	0	0	0	0	0	0	0	1	0	0	1	3	3	0	20
2	39497830	39498704	LINE/L1	L1PA5	DF02523790	0	0	1	0	0	1	1	0	0	0	0	0	0	0	0	0	0	0	0	0	0	0	0	3	3	0	20
11	85563209	85565337	LINE/L1	L1ME2z	DF00901132	0	0	0	0	0	0	0	0	0	0	0	1	0	0	0	0	0	0	1	0	1	0	0	3	3	0	20
11	28157124	28159885	LTR/ERVL	HERVL-int	DF00787851	0	0	0	0	0	1	0	0	0	0	0	0	0	0	0	0	0	0	1	1	0	0	0	3	3	0	20
X	23807913	23808079	SINE/Alu	AluSx3	DF05643259	0	0	0	0	0	0	0	0	0	0	1	0	1	0	0	0	0	0	0	0	1	0	0	3	3	0	20
12	50827882	50829771	LINE/L1	L1M1	DF01088960	0	0	0	0	0	0	0	0	0	0	0	1	1	0	0	0	0	0	0	0	0	0	1	3	3	0	20
12	10564490	10566681	LINE/L1	L1PA7	DF01018528	0	0	0	0	0	0	0	0	0	0	0	1	0	0	0	0	0	0	1	0	1	0	0	3	3	0	20
17	8179144	8179447	SINE/Alu	AluSx	DF01998260	0	0	0	0	0	0	0	0	0	0	0	0	1	0	0	0	0	0	1	0	1	0	0	3	3	0	20
3	178952592	178953414	LINE/L1	L1MC5	DF03530555	0	0	1	0	0	0	0	0	0	0	0	1	0	0	0	0	0	0	1	0	0	0	0	3	3	0	20
13	51425496	51425955	LINE/RTE-BovB	MamRTE1	DF01334343	0	0	0	0	0	0	0	0	0	0	0	1	0	0	0	0	0	0	0	1	0	0	1	3	3	0	20
6	27117890	27119800	LINE/L1	L1ME1	DF04302327	0	0	0	0	0	0	0	0	0	0	0	1	0	0	0	0	0	0	1	0	1	0	0	3	3	0	20
12	10537033	10538604	LTR/ERVL-MaLR	THE1B-int	DF01018474	0	0	0	0	0	0	0	0	0	0	0	1	0	0	0	0	0	0	1	0	1	0	0	3	3	0	20
5	61194896	61201261	LINE/L1	L1PA10	DF04014437	0	0	0	0	0	0	0	0	0	0	0	1	0	0	0	0	0	0	1	0	1	0	0	3	3	0	20
9	32475252	32476181	LINE/L1	L1MD	DF05199636	0	0	0	0	0	0	0	0	0	0	0	0	0	0	0	0	0	0	1	1	0	0	1	3	3	0	20
6	47641258	47647686	LTR/ERV1	Harlequin-int	DF04347971	0	0	0	0	0	0	0	0	0	0	0	1	0	0	0	0	0	0	1	0	1	0	0	3	3	0	20
7	108576078	108577168	LINE/L2	L2a	DF04770201	0	0	0	0	0	0	0	0	0	0	0	1	1	0	0	0	0	0	0	1	0	0	0	3	3	0	20
7	111175576	111176842	LINE/L1	L1MA3	DF04774431	0	0	0	0	0	0	0	0	0	0	0	0	0	0	0	0	0	0	1	1	0	0	1	3	3	0	20
7	111179495	111180698	DNA/TcMar-Tigger	Tigger1	DF04774435	0	0	0	0	0	0	0	0	0	0	0	0	0	0	0	0	0	0	1	1	0	0	1	3	3	0	20
5	43260615	43266748	LINE/L1	L1PA5	DF03990114	0	0	0	0	0	0	0	0	0	0	0	1	1	0	0	0	0	0	0	0	1	0	0	3	3	0	20
3	52537594	52538012	LINE/L2	L2c	DF03300972	0	0	0	0	0	0	0	0	0	0	0	1	0	0	0	0	0	1	0	0	0	0	1	3	3	0	20
6	85670858	85671118	SINE/Alu	AluSg	DF04408749	0	0	0	0	0	0	0	0	0	0	0	1	1	0	0	0	0	0	0	0	1	0	0	3	3	0	20
15	76013353	76019807	LINE/L1	L1PA7	DF01733374	0	0	0	0	0	0	0	0	0	0	0	1	0	0	0	0	0	0	1	1	0	0	0	3	3	0	20
9	71674535	71676187	LTR/ERVL-MaLR	MLT1A0-int	DF05240152	0	0	0	0	0	0	0	0	0	0	0	1	0	0	0	0	0	0	1	0	1	0	0	3	3	0	20
2	68546139	68547745	LINE/L1	L1M5	DF02580690	0	0	0	0	0	0	0	0	0	0	0	0	0	0	0	0	0	0	1	1	1	0	0	3	3	0	20
1	173743689	173745160	LINE/L1	L1MC4a	DF00327516	0	0	0	0	0	0	0	0	0	0	0	1	0	0	0	0	0	0	0	1	1	0	0	3	3	0	20
19	11632772	11634349	LTR/ERVL-MaLR	THE1A-int	DF02332538	0	0	0	0	0	0	0	0	0	0	0	1	0	0	0	0	0	0	1	0	1	0	0	3	3	0	20
9	19365063	19366319	LINE/L1	L1MB8	DF05177357	0	0	0	0	0	0	0	0	0	0	0	1	0	0	0	0	0	0	1	0	1	0	0	3	3	0	20
17	8362537	8363071	LTR/ERVL-MaLR	MLT1G1	DF01998788	0	0	0	0	0	1	0	0	0	0	0	1	0	0	0	0	0	0	0	0	1	0	0	3	3	0	20
1	78065252	78067034	LINE/L1	L1PA13	DF00182990	0	0	0	0	0	0	0	0	0	0	0	1	0	0	0	0	0	0	1	0	1	0	0	3	3	0	20
14	20479977	20480129	SINE/Alu	FRAM	DF01445218	0	0	0	0	0	0	0	0	0	0	1	1	1	0	0	0	0	0	0	0	0	0	0	3	3	0	20
2	101735802	101736121	DNA/TcMar-Tigger	Tigger10	DF02638751	0	0	0	0	0	0	0	0	0	0	0	0	0	0	0	0	0	0	1	1	0	0	1	3	3	0	20
2	38684926	38685394	LTR/ERVL-MaLR	MLT1L	DF02521815	0	0	0	0	0	0	0	0	0	0	0	1	0	0	0	0	0	0	1	0	1	0	0	3	3	0	20
18	59340219	59345072	LINE/L1	L1PB4	DF02264408	0	0	1	0	0	1	0	0	0	0	0	0	0	0	0	0	0	0	0	1	0	0	0	3	3	0	20
5	82183076	82184129	LINE/L1	L1MC5	DF04055962	0	0	0	0	0	0	0	0	0	0	0	1	0	0	0	0	0	0	1	0	1	0	0	3	3	0	20
4	152253659	152255153	LINE/L1	L1MC1	DF03847527	0	0	0	0	0	0	0	0	0	0	0	1	0	0	0	0	0	0	1	0	1	0	0	3	3	0	20
6	27684097	27684397	SINE/Alu	AluSx1	DF04303747	0	0	0	0	0	0	0	0	0	0	0	1	0	0	0	0	0	0	1	0	1	0	0	3	3	0	20
9	120912683	120913167	LINE/CR1	L3	DF05356487	0	0	0	0	0	0	0	0	0	0	0	0	0	0	1	0	0	0	0	1	0	0	1	3	3	0	20
1	1412722	1416234	LTR/ERV1	Harlequin-int	DF00002256	0	0	0	0	0	0	0	0	0	0	0	1	0	0	0	0	0	0	1	0	1	0	0	3	3	0	20
16	84855696	84861284	LTR/ERVL	HERVL-int	DF01964950	0	0	0	0	0	1	0	0	0	0	0	1	0	0	0	0	0	0	0	0	1	0	0	3	3	0	20
7	96626449	96631582	LINE/L1	L1MA2	DF04743543	0	0	0	0	0	0	0	0	0	0	0	1	0	0	0	0	0	0	1	0	1	0	0	3	3	0	20
10	89044926	89046658	LINE/L1	L1PA16	DF00645058	0	0	0	0	0	0	0	0	0	0	0	1	0	0	0	0	0	0	1	0	0	0	1	3	3	0	20
10	89041944	89043640	LINE/L1	L1MA3	DF00645054	0	0	0	0	0	0	0	0	0	0	0	1	0	0	0	0	0	0	1	0	0	0	1	3	3	0	20
4	106279312	106282669	LINE/L1	L1MA3	DF03768098	0	0	0	0	0	1	0	0	0	0	0	0	0	0	0	0	0	0	1	1	0	0	0	3	3	0	20
4	775842	775934	LINE/L1	L1M5	DF03574199	0	0	1	0	0	0	0	0	0	0	0	0	0	0	0	0	0	0	0	1	1	0	0	3	3	0	20
5	115499544	115501011	LINE/L1	L1MA6	DF04110929	0	0	0	0	0	0	0	0	0	0	0	1	0	0	0	0	0	0	0	0	1	0	1	3	3	0	20
14	92852828	92858974	LINE/L1	L1PA4	DF01587168	0	0	0	0	0	0	0	0	0	0	0	1	1	0	0	0	0	0	0	0	1	0	0	3	3	0	20
2	216514937	216515265	LINE/L1	L1MEg	DF02883716	0	0	0	0	0	0	0	0	0	0	0	1	0	0	0	0	0	0	1	0	1	0	0	3	3	0	20
1	28346055	28346292	SINE/Alu	AluSx3	DF00067625	0	0	0	0	0	0	0	0	0	0	0	1	1	0	0	0	0	0	0	0	1	0	0	3	3	0	20
3	146492218	146493660	LINE/L1	L1P4	DF03472014	0	0	0	0	0	0	0	0	0	0	0	1	1	0	0	0	0	0	0	0	0	0	1	3	3	0	20
7	139107265	139107517	DNA/hAT-Charlie	Charlie7	DF04827057	0	0	0	0	0	0	0	0	0	0	0	0	1	0	0	0	0	0	0	1	0	0	1	3	3	0	20
14	81521480	81522673	DNA/TcMar-Tigger	Tigger3b	DF01564409	0	0	1	0	0	0	0	0	0	0	0	0	0	0	0	0	0	0	0	1	0	0	1	3	3	0	20
9	33051773	33052032	SINE/Alu	AluSq2	DF05200851	0	0	0	0	0	0	0	0	0	0	0	1	0	0	0	0	0	0	1	0	1	0	0	3	3	0	20
16	50753194	50753714	DNA/hAT-Tip100	MamTip3	DF01888342	0	0	0	0	0	0	0	0	0	0	0	1	0	0	0	0	0	0	0	1	0	0	1	3	3	0	20
2	100718805	100720887	LINE/L1	L1M7	DF02636454	1	0	0	0	0	0	0	0	0	0	0	1	0	0	0	1	0	0	0	0	0	0	0	3	3	0	20
17	16046114	16046870	LINE/CR1	L3	DF02016434	0	0	1	0	0	0	0	0	0	0	0	1	0	0	0	0	0	0	0	0	0	0	1	3	3	0	20
12	68859569	68859794	SINE/MIR	MIRb	DF01124942	0	0	0	0	0	0	0	0	0	0	0	1	0	0	0	0	0	0	1	0	1	0	0	3	3	0	20
2	119358601	119359765	DNA/TcMar-Tigger	Tigger1	DF02671706	0	0	0	0	0	0	0	0	0	0	0	0	0	0	0	0	0	0	1	0	1	0	1	3	3	0	20
16	57240851	57241373	LINE/L2	L2c	DF01902783	0	0	0	0	0	0	0	0	0	0	0	1	0	0	0	0	0	0	0	0	1	0	1	3	3	0	20
16	57242605	57243097	LTR/ERVL-MaLR	MLT1G1	DF01902787	0	0	0	0	0	0	0	0	0	0	0	1	0	0	0	0	0	0	0	0	1	0	1	3	3	0	20
8	22985090	22985644	LTR/ERVK	LTR14	DF04908007	0	0	0	0	0	0	0	0	0	0	0	1	0	0	0	0	0	0	1	0	1	0	0	3	3	0	20
1	154048460	154051209	LTR/ERVK	HERVK9-int	DF00287939	0	0	0	0	0	0	0	0	0	0	0	1	0	0	0	0	0	0	1	0	1	0	0	3	3	0	20
3	122702520	122702710	SINE/MIR	MIRb	DF03423845	0	0	0	0	0	0	0	0	0	0	0	0	0	0	0	0	0	0	1	1	0	0	1	3	3	0	20
7	129579721	129583087	LTR/ERV1	Harlequin-int	DF04807088	0	0	0	0	0	0	0	0	0	0	0	1	0	0	0	0	0	0	1	0	1	0	0	3	3	0	20
1	162746008	162752153	LINE/L1	L1PA6	DF00306359	0	0	1	0	0	1	0	0	0	0	0	0	0	0	0	0	0	0	0	0	1	0	0	3	3	0	20
2	175042119	175045179	LINE/L1	L1PA8A	DF02773271	0	0	1	0	0	0	0	0	0	0	0	1	0	0	0	0	0	0	0	0	1	0	0	3	3	0	20
4	44772329	44777762	LTR/ERV1	MER50-int	DF03663251	0	0	0	0	0	0	0	0	0	0	0	1	0	0	0	0	0	0	1	1	0	0	0	3	3	0	20
11	62887065	62887403	LINE/L2	L2a	DF00848872	1	0	1	0	0	0	0	0	0	0	0	0	0	0	0	1	0	0	0	0	0	0	0	3	3	0	20
6	27906849	27908543	LINE/L1	L1PA16	DF04304287	0	0	0	0	0	0	0	0	0	0	0	1	0	0	0	0	0	0	0	1	1	0	0	3	3	0	20
5	66378565	66382751	LINE/L1	L1PB2	DF04024032	0	0	0	0	0	0	0	0	0	0	0	1	0	0	0	0	0	0	1	0	1	0	0	3	3	0	20
5	179843458	179843764	SINE/Alu	AluJr	DF04244471	0	0	0	0	0	0	0	0	0	0	0	1	1	0	0	0	0	0	0	0	1	0	0	3	3	0	20
2	121669430	121671080	LINE/L1	L1PBa	DF02676661	0	0	0	0	0	0	0	0	0	0	0	0	0	0	0	0	0	0	0	1	1	0	1	3	3	0	20
3	158915475	158916542	LTR/ERV1	MER66-int	DF03494743	0	0	0	0	0	0	0	0	0	0	0	1	0	0	0	0	0	0	1	0	0	0	1	3	3	0	20
11	10828487	10829605	LTR/ERVL-MaLR	THE1D-int	DF00753475	0	0	0	0	0	0	0	0	0	0	0	1	0	0	0	0	0	0	1	0	1	0	0	3	3	0	20
8	6733935	6735745	LINE/L1	L1MCa	DF04876190	0	0	1	0	0	0	0	0	0	0	0	0	0	0	0	0	0	0	0	1	0	0	1	3	3	0	20
X	102663700	102666526	LINE/L1	L1PA10	DF05777103	0	0	0	0	0	1	0	0	0	0	0	0	0	0	0	0	0	0	1	0	0	0	1	3	3	0	20
2	232698920	232699354	LINE/L2	L2a	DF02917607	0	0	0	0	0	0	0	0	0	0	0	0	0	0	0	0	0	0	1	1	0	0	1	3	3	0	20
11	33123158	33123881	LINE/L1	L1ME4b	DF00797632	0	0	0	0	0	0	0	0	0	0	0	0	0	0	0	0	0	0	1	0	1	0	1	3	3	0	20
12	108634441	108634794	LINE/L2	L2b	DF01204925	0	0	1	0	0	0	0	0	0	0	0	1	0	0	0	0	0	0	0	0	0	0	1	3	3	0	20
6	34846432	34847913	LINE/L1	L1M1	DF04319250	0	0	0	0	0	0	0	0	0	0	0	1	0	0	0	0	0	0	1	1	0	0	0	3	3	0	20
10	94650936	94655170	LTR/ERVL	HERVL-int	DF00657554	0	0	0	0	0	0	0	0	0	0	0	1	0	0	0	0	0	0	1	0	1	0	0	3	3	0	20
19	39816844	39817933	LINE/L1	L1MD3	DF02393134	0	0	0	0	0	0	0	0	0	0	0	1	1	0	0	0	0	0	0	0	1	0	0	3	3	0	20
8	78763235	78766453	LINE/L1	L1MC1	DF05009462	0	0	0	0	0	0	0	0	0	0	0	1	0	0	0	0	0	0	0	0	1	0	1	3	3	0	20
12	75461127	75467562	LINE/L1	L1PA8	DF01137052	0	0	0	0	0	0	0	0	0	0	0	1	0	0	0	0	0	0	1	0	1	0	0	3	3	0	20
6	145774596	145778466	LINE/L1	L1PA8	DF04516295	0	0	0	0	0	0	0	0	0	0	0	1	0	0	0	0	0	0	0	0	1	0	1	3	3	0	20
20	45088846	45090363	LTR/ERVL	ERVL-E-int	DF02992387	0	0	0	0	0	0	0	0	0	0	0	1	0	0	0	0	0	0	0	1	1	0	0	3	3	0	20
5	14429684	14430139	LINE/L1	L1ME4b	DF03937343	0	0	1	0	0	1	0	0	0	0	0	0	0	0	0	0	0	0	0	0	0	0	1	3	3	0	20
19	5709629	5709933	SINE/Alu	AluY	DF02314793	0	0	1	0	0	0	1	0	0	0	0	0	0	0	0	0	0	0	0	0	1	0	0	3	3	0	20
2	37132611	37135455	LTR/ERV1	HERVFH19-int	DF02518606	0	1	1	0	0	0	0	0	0	0	0	0	1	0	0	0	0	0	0	0	0	0	0	3	3	0	20
X	103679540	103679697	LINE/L1	L1ME3G	DF05779156	1	0	1	0	0	0	0	0	0	0	0	0	0	0	0	0	0	0	0	1	0	0	0	3	3	0	20
19	27704526	27712236	LTR/ERVK	HERVK11-int	DF02364749	0	0	0	0	0	0	0	0	0	1	0	1	0	0	0	0	0	0	0	0	1	0	0	3	3	0	20
3	15551342	15553259	LINE/L1	L1MA3	DF03227306	0	0	0	0	0	0	0	0	0	0	0	1	1	0	0	0	0	0	0	0	1	0	0	3	3	0	20
12	105111873	105112775	LINE/L1	L1MB8	DF01196220	0	0	1	0	0	0	0	0	0	0	0	0	0	0	0	0	0	0	0	1	0	0	1	3	3	0	20
9	71990501	71992616	LTR/ERVL	ERVL-E-int	DF05240876	0	0	0	0	0	0	0	0	0	0	0	1	0	0	0	0	0	0	1	0	1	0	0	3	3	0	20
3	178934985	178936528	LINE/L1	L1MA7	DF03530523	0	0	1	0	0	0	0	0	0	0	0	1	0	0	0	0	0	0	1	0	0	0	0	3	3	0	20
3	178936867	178942449	LINE/L1	L1PA3	DF03530526	0	0	1	0	0	0	0	0	0	0	0	1	0	0	0	0	0	0	1	0	0	0	0	3	3	0	20
3	121878275	121880134	LINE/L1	L1MA4	DF03422074	0	0	0	0	0	0	0	0	0	0	0	0	0	0	0	0	0	0	1	1	0	0	1	3	3	0	20
6	111382159	111383179	LINE/L1	L1M1	DF04455026	0	0	0	0	0	1	0	0	0	0	0	0	0	0	0	0	0	0	0	0	1	0	1	3	3	0	20
6	111383173	111385402	LINE/L1	L1MA3	DF04455027	0	0	0	0	0	1	0	0	0	0	0	0	0	0	0	0	0	0	0	1	0	0	1	3	3	0	20
6	111378511	111379013	LINE/CR1	L3	DF04455021	0	0	0	0	0	0	0	0	0	0	0	1	0	0	0	0	0	0	0	1	0	0	1	3	3	0	20
3	9259854	9266383	LINE/L1	L1PA7	DF03211870	0	0	0	0	0	0	0	0	0	0	0	1	0	0	0	0	0	0	1	0	1	0	0	3	3	0	20
6	111336500	111337287	LINE/L1	L1MB8	DF04454955	0	0	0	0	0	0	0	0	0	0	0	1	0	0	0	0	0	0	0	1	0	0	1	3	3	0	20
18	35285205	35287864	LINE/L1	L1ME1	DF02218468	0	0	0	0	0	0	0	0	0	0	0	0	0	0	0	0	0	0	0	1	1	0	1	3	3	0	20
13	51413910	51414366	LTR/ERVL-MaLR	MLT1J	DF01334318	0	0	0	0	0	0	0	0	0	0	0	1	0	0	0	0	0	0	0	1	0	0	1	3	3	0	20
1	93378934	93379471	LINE/L1	L1MA3	DF00211330	0	0	0	0	0	0	0	0	0	0	0	1	0	0	0	0	0	0	0	0	1	0	1	3	3	0	20
15	89497838	89498009	SINE/Alu	AluJr	DF01762318	0	0	0	0	0	0	0	0	0	0	0	0	1	0	0	0	0	0	1	0	1	0	0	3	3	0	20
1	185251798	185257802	LINE/L1	L1PA2	DF00350691	0	0	0	0	0	0	0	0	0	0	0	1	0	0	0	0	0	0	1	1	0	0	0	3	3	0	20
1	171504073	171505021	LINE/L1	L1MEc	DF00323358	0	0	1	0	0	0	0	0	0	0	0	1	0	0	0	0	0	0	0	1	0	0	0	3	3	0	20
10	798816	800334	LINE/L1	L1PA15-16	DF00406909	0	0	1	0	0	0	0	0	0	0	0	1	0	0	0	0	0	0	0	0	0	0	1	3	3	0	20
10	796405	797317	LTR/ERVL-MaLR	THE1B-int	DF00406902	0	0	0	0	0	0	0	0	0	0	0	1	0	0	0	0	0	0	0	0	1	0	1	3	3	0	20
9	32496758	32497465	LINE/L1	L1MB2	DF05199687	0	0	0	0	0	0	0	0	0	0	0	0	0	0	0	0	0	0	0	1	1	0	1	3	3	0	20
9	120843921	120844068	DNA/TcMar-Tigger	Tigger20a	DF05356306	1	0	0	0	0	0	0	1	0	0	0	0	0	0	0	0	0	0	0	1	0	0	0	3	3	0	20
2	70201915	70203817	LTR/ERVL	HERVL18-int	DF02584451	0	0	0	0	0	0	0	0	0	0	0	1	1	0	0	0	0	0	0	0	0	0	1	3	3	0	20
2	117845297	117846001	LINE/L1	L1MB4	DF02668628	0	0	0	0	0	0	0	0	0	0	0	1	1	0	0	0	0	0	0	0	1	0	0	3	3	0	20
20	3970958	3972618	LINE/L1	L1MD1	DF02838103	0	0	0	0	0	0	0	0	0	0	0	1	0	0	0	0	0	0	1	0	1	0	0	3	3	0	20
9	32516421	32516756	LTR/ERV1	LOR1-int	DF05199722	0	0	0	0	0	0	0	0	0	0	0	0	1	0	0	0	0	0	0	1	0	0	1	3	3	0	20
9	32522830	32523267	LTR/ERV1	LOR1b	DF05199728	0	0	0	0	0	0	0	0	0	0	0	0	0	0	0	0	0	0	0	1	1	0	1	3	3	0	20
17	61664167	61665675	LINE/L1	L1PA7	DF02113937	0	0	0	0	0	0	0	0	0	0	0	1	0	0	0	0	0	0	1	0	1	0	0	3	3	0	20
9	32458308	32458631	LINE/L1	L1ME4a	DF05199593	0	0	0	0	0	0	0	0	0	0	0	1	0	0	0	0	0	0	0	1	1	0	0	3	3	0	20
1	37518069	37519559	LTR/ERV1	LTR12E	DF00091511	0	0	0	0	0	0	0	1	0	0	0	1	0	0	0	0	0	0	0	0	1	0	0	3	3	0	20
17	43350760	43351750	LTR/ERVK	LTR13	DF02071198	0	0	0	0	0	0	0	0	0	0	0	1	0	0	0	0	0	0	0	1	1	0	0	3	3	0	20
17	43352269	43352788	LTR/ERV1	MER41C	DF02071199	0	0	0	0	0	0	0	0	0	0	0	1	0	0	0	0	0	0	0	1	1	0	0	3	3	0	20
4	76957361	76957584	SINE/MIR	MIR	DF03716347	0	0	0	0	0	1	0	0	0	0	0	0	0	0	0	0	0	0	0	1	0	0	1	3	3	0	20
3	153241783	153243407	DNA/TcMar-Tigger	Tigger1	DF03484471	0	0	0	0	0	0	0	0	0	0	0	1	0	0	0	0	0	0	1	0	0	0	1	3	3	0	20
12	111908607	111910183	LINE/L1	L1MA2	DF01214220	0	0	0	0	0	0	0	0	0	0	0	1	1	0	0	0	0	0	0	0	0	0	1	3	3	0	20
2	101208571	101210456	LINE/L1	L1MA4	DF02637460	0	0	0	0	0	0	0	0	0	0	0	1	0	0	0	0	0	0	1	0	0	0	1	3	3	0	20
17	8127906	8128211	SINE/Alu	AluSx	DF01998131	0	0	0	0	0	0	0	0	0	0	0	0	1	0	0	0	0	0	1	0	1	0	0	3	3	0	20
1	212616598	212617092	LINE/L2	L2a	DF00403002	0	0	1	0	0	0	1	0	0	0	0	1	0	0	0	0	0	0	0	0	0	0	0	3	3	0	20
11	85483963	85484263	rRNA	LSU-rRNA_Hsa	DF00901000	0	0	1	0	0	0	0	0	0	0	0	0	1	0	0	0	0	0	0	0	1	0	0	3	3	0	20
7	127345850	127346677	LINE/L2	L2a	DF04802092	0	0	1	0	0	0	0	0	0	0	0	0	0	0	0	0	1	0	0	0	1	0	0	3	3	0	20
3	47801949	47802245	SINE/Alu	AluSq2	DF03290912	0	0	0	0	0	0	0	0	0	0	0	1	1	0	0	0	0	0	0	0	1	0	0	3	3	0	20
4	102792217	102793108	LINE/L2	L2a	DF03762378	0	0	0	0	0	1	0	0	0	0	0	1	0	0	0	0	0	0	1	0	0	0	0	3	3	0	20
1	78636186	78636335	LINE/L2	L2b	DF00184024	0	0	0	0	1	0	0	0	0	0	0	0	0	0	0	1	0	0	0	1	0	0	0	3	3	0	20
20	31666964	31667149	SINE/MIR	MIRb	DF02956242	1	0	0	0	0	0	1	0	0	0	0	0	0	0	0	1	0	0	0	0	0	0	0	3	3	0	20
12	19725068	19727042	LTR/ERV1	MER52A	DF01035907	0	0	1	0	0	0	0	0	0	0	0	0	0	0	0	0	0	0	0	0	1	0	1	3	3	0	20
2	96574673	96576446	LTR/ERVL	ERVL-E-int	DF02628517	0	0	0	0	0	0	0	0	0	0	0	1	0	0	0	0	0	0	1	0	0	0	1	3	3	0	20
12	105191675	105192857	LINE/L2	L2b	DF01196352	0	0	0	0	0	1	0	0	0	0	0	0	0	0	0	0	0	0	0	1	1	0	0	3	3	0	20
7	106259722	106261112	DNA/TcMar-Tigger	Tigger1	DF04765840	0	0	1	0	0	0	0	0	0	0	0	0	0	0	0	1	0	0	0	1	0	0	0	3	3	0	20
19	39989539	39990438	LINE/L1	L1M3	DF02393640	0	0	0	0	0	0	0	0	0	0	0	1	0	0	0	0	0	0	1	0	1	0	0	3	3	0	20
3	37394564	37395981	DNA/TcMar-Tigger	Tigger1	DF03269094	0	0	1	0	0	0	0	0	0	0	0	1	0	0	0	0	0	0	0	0	0	0	1	3	3	0	20
7	105148640	105149665	LTR/ERVK	LTR5A	DF04763093	0	0	0	0	0	0	0	0	0	0	0	0	0	0	0	0	0	0	1	1	0	0	1	3	3	0	20
6	126161089	126164996	LINE/L1	L1PA7	DF04480484	0	0	1	0	0	0	0	0	0	0	0	1	0	0	0	0	0	0	1	0	0	0	0	3	3	0	20
17	64497593	64497658	DNA/hAT-Charlie	MER5A	DF02120687	0	0	0	0	0	0	0	0	0	0	0	1	1	0	0	0	0	0	1	0	0	0	0	3	3	0	20
12	68850702	68850925	DNA/hAT-Charlie	MER103C	DF01124930	0	0	0	0	0	0	0	0	0	0	0	1	0	0	0	0	0	0	1	0	1	0	0	3	3	0	20
10	89036597	89041890	LINE/L1	L1MA3	DF00645052	0	0	0	0	0	0	0	0	0	0	0	1	0	0	0	0	0	0	1	0	0	0	1	3	3	0	20
5	39065448	39067086	LTR/ERVL-MaLR	MSTA-int	DF03982496	0	0	1	0	0	1	0	0	0	0	0	0	0	0	0	0	0	0	0	1	0	0	0	3	3	0	20
3	101837613	101838026	DNA/TcMar-Tigger	Tigger23a	DF03386707	0	0	0	0	0	0	0	0	0	0	0	0	0	0	0	0	0	0	1	1	0	0	1	3	3	0	20
14	39140955	39142148	LTR/ERVL-MaLR	THE1A-int	DF01480001	0	0	1	0	0	0	0	0	0	0	0	1	0	0	0	0	0	0	0	0	1	0	0	3	3	0	20
6	31349710	31350305	LTR/ERV1	MER4B	DF04311313	0	0	0	0	0	0	0	0	0	0	0	1	1	0	0	0	0	0	0	0	0	0	1	3	3	0	20
6	31350433	31351055	LTR/ERV1	LTR9	DF04311315	0	0	0	0	0	0	0	0	0	0	0	1	1	0	0	0	0	0	0	0	0	0	1	3	3	0	20
19	41872936	41873081	SINE/MIR	MIR	DF02398806	0	0	0	0	0	0	0	0	0	0	0	1	1	0	0	0	0	0	1	0	0	0	0	3	3	0	20
19	41873133	41873220	SINE/MIR	MIRb	DF02398807	0	0	0	0	0	0	0	0	0	0	0	1	1	0	0	0	0	0	1	0	0	0	0	3	3	0	20
15	78492204	78492557	LINE/L1	L1MC5	DF01738635	0	0	0	0	0	0	0	0	0	0	0	0	0	0	0	0	0	0	1	1	1	0	0	3	3	0	20
15	78492856	78493243	LINE/L1	L1MC5	DF01738637	0	0	0	0	0	0	0	0	0	0	0	0	0	0	0	0	0	0	1	1	1	0	0	3	3	0	20
6	126216528	126219297	LINE/L1	L1MA3	DF04480561	0	0	1	0	0	0	0	0	0	0	0	1	0	0	0	0	0	0	1	0	0	0	0	3	3	0	20
3	178972959	178974188	LINE/L1	L1MDa	DF03530603	0	0	1	0	0	0	0	0	0	0	0	1	0	0	0	0	0	0	0	0	0	0	1	3	3	0	20
9	32483055	32483133	LINE/L2	L2b	DF05199657	0	0	0	0	0	0	0	0	0	0	0	0	0	0	0	0	0	0	1	1	0	0	1	3	3	0	20
4	86922421	86922940	LTR/ERVL	LTR41C	DF03734823	0	0	1	0	1	0	0	0	0	0	0	0	0	0	0	0	0	0	0	1	0	0	0	3	3	0	20
14	53016492	53018189	LTR/ERV1	MER34-int	DF01504527	0	0	0	0	0	0	0	0	0	0	0	1	0	0	0	0	0	0	0	0	1	0	1	3	3	0	20
6	118402822	118406344	LTR/ERVL	ERVL-E-int	DF04467268	0	0	1	0	0	0	0	0	0	0	0	1	0	0	0	0	0	0	0	0	1	0	0	3	3	0	20
8	99824597	99828394	LINE/L1	L1PA7	DF05048865	0	0	0	0	0	0	0	0	0	0	0	1	1	0	0	0	0	0	0	0	1	0	0	3	3	0	20
3	157138064	157138459	LTR/ERVL-MaLR	MSTB1	DF03491645	0	0	0	0	0	0	0	0	0	0	0	1	1	0	0	0	0	0	0	0	0	0	1	3	3	0	20
4	168217486	168217993	LTR/ERVL-MaLR	MLT1D	DF03875543	0	0	0	0	0	0	0	0	0	0	0	0	0	0	0	0	0	0	1	1	0	0	1	3	3	0	20
15	44719077	44719220	SINE/Alu	FLAM_C	DF01666318	0	0	0	0	0	0	0	0	0	0	0	1	0	0	0	0	0	0	0	1	0	0	1	3	3	0	20
18	70098647	70102897	LINE/L1	L1PA5	DF02283895	0	0	1	0	1	0	0	0	0	0	0	0	0	0	0	0	0	0	0	1	0	0	0	3	3	0	20
2	195666867	195667545	DNA/TcMar-Tigger	Tigger10	DF02807776	0	0	0	0	0	1	0	0	0	0	0	0	0	0	0	0	0	0	1	0	0	0	1	3	3	0	20
3	154262606	154268723	LINE/L1	L1PA5	DF03486340	0	0	0	0	0	0	0	0	0	0	0	1	0	0	0	0	0	0	1	0	0	0	1	3	3	0	20
17	35879200	35879352	SINE/MIR	MIRb	DF02053179	0	0	0	0	0	0	0	0	0	0	0	0	0	0	0	0	0	0	1	1	1	0	0	3	3	0	20
19	5710395	5710677	SINE/Alu	AluJb	DF02314796	0	0	1	1	0	0	0	0	0	0	0	0	0	0	0	1	0	0	0	0	0	0	0	3	3	0	20
2	206096583	206097426	LTR/ERVL	MER21C	DF02864877	0	0	0	0	0	0	0	0	0	0	0	1	0	0	0	0	0	0	1	0	1	0	0	3	3	0	20
17	35245015	35245520	DNA/TcMar-Tigger	Tigger7	DF02051826	0	0	1	0	0	0	0	0	0	0	0	0	0	0	0	0	0	0	0	1	0	0	1	3	3	0	20
6	144190177	144190423	SINE/MIR	MIR	DF04513454	0	0	0	0	1	0	0	0	0	0	0	0	0	0	0	0	0	0	0	1	0	0	1	3	3	0	20
15	44706506	44708323	LINE/L1	L1M1	DF01666293	0	0	0	0	0	0	0	0	0	0	0	0	0	0	0	0	0	0	1	1	0	0	1	3	3	0	20
9	19360520	19360908	LTR/ERVL-MaLR	MLT1J	DF05177339	0	0	0	0	0	0	0	0	0	0	0	1	0	0	0	0	0	0	1	0	1	0	0	3	3	0	20
20	29118865	29120143	LTR/ERVL	LTR53-int	DF02952708	1	0	0	0	0	0	0	0	0	0	0	0	1	0	0	0	0	0	1	0	0	0	0	3	3	0	20
10	27551343	27552138	LINE/L2	L2a	DF00529847	0	0	1	0	0	0	0	0	0	0	0	1	0	0	0	0	0	0	0	0	0	0	1	3	3	0	20
3	93470362	93470800	Satellite	SAR	DF03373388	0	0	0	0	0	0	0	0	0	0	0	1	0	0	0	0	0	0	1	0	1	0	0	3	3	0	20
2	101727233	101727686	DNA/hAT-Tag1	hAT-1_Mam	DF02638730	0	0	0	0	0	0	0	0	0	0	0	0	0	0	0	0	0	0	1	1	0	0	1	3	3	0	20
2	206927007	206931028	LINE/L1	L1PA10	DF02866595	0	0	0	0	0	0	0	0	0	0	0	1	0	0	0	0	0	0	1	0	1	0	0	3	3	0	20
9	110233014	110235905	LINE/L1	L1PA4	DF05330831	0	0	0	0	0	0	0	0	0	0	0	1	1	0	0	0	0	0	0	0	1	0	0	3	3	0	20
8	105850601	105853714	LINE/L1	L1PB1	DF05061459	0	0	0	0	0	1	0	0	0	0	0	1	0	0	0	0	0	0	1	0	0	0	0	3	3	0	20
15	65685735	65686217	LINE/L1	L1MB7	DF01709346	0	0	0	0	0	0	0	0	0	0	0	1	0	0	0	0	0	0	0	1	0	0	1	3	3	0	20
22	18155343	18156872	LTR/ERV1	LTR12E	DF03114984	0	1	0	0	0	0	0	0	0	0	0	0	0	0	0	0	0	0	0	1	1	0	0	3	3	0	20
5	91566596	91570678	LINE/L1	L1PB1	DF04071563	0	0	0	0	0	0	0	0	0	0	0	0	0	0	0	0	0	0	1	0	1	0	1	3	3	0	20
9	125239605	125239902	SINE/Alu	AluSx	DF05366995	0	0	1	0	0	0	0	0	0	0	0	0	0	0	0	1	0	0	0	1	0	0	0	3	3	0	20
22	28495843	28497284	LINE/L2	L2a	DF03138002	0	0	1	0	0	0	0	0	0	0	0	0	0	0	0	0	0	0	1	0	0	0	1	3	3	0	20
1	185195000	185198933	LINE/L1	L1PA7	DF00350582	0	0	0	0	0	1	0	0	0	0	0	1	0	0	0	0	0	0	0	1	0	0	0	3	3	0	20
3	10153296	10153456	SINE/Alu	AluSq2	DF03214324	0	0	1	0	1	0	0	0	0	0	0	0	1	0	0	0	0	0	0	0	0	0	0	3	3	0	20
5	151017538	151018010	LINE/L2	L2b	DF04180202	0	0	0	0	0	0	0	0	0	0	0	1	0	0	0	0	0	0	0	1	0	0	1	3	3	0	20
3	156710463	156710889	LTR/ERVL-MaLR	MLT1D	DF03490864	0	0	0	0	0	0	0	0	0	0	0	1	1	0	0	0	0	0	0	0	0	0	1	3	3	0	20
2	47136754	47138386	LINE/L1	L1MC1	DF02539286	0	0	1	0	0	0	0	0	0	0	0	1	0	0	0	0	0	0	0	0	0	0	1	3	3	0	20
10	123191469	123191878	LTR/ERVL-MaLR	MLT1C2	DF00716761	0	0	0	0	0	0	0	0	0	0	0	1	0	0	0	0	0	0	0	0	1	0	1	3	3	0	20
19	21042815	21046039	LINE/L1	L1PA10	DF02358467	0	0	0	0	0	1	0	1	0	0	0	0	0	0	0	0	0	0	0	1	0	0	0	3	3	0	20
15	81362976	81363266	SINE/Alu	AluSx4	DF01745269	0	0	0	0	0	0	0	0	0	0	1	0	1	0	0	0	0	0	0	0	1	0	0	3	3	0	20
15	65754444	65755405	LINE/L1	L1MB8	DF01709498	0	0	0	0	0	0	0	0	0	0	0	1	0	0	0	0	0	0	0	1	0	0	1	3	3	0	20
6	118439547	118442480	LINE/L1	L1MA2	DF04467307	0	0	1	0	0	0	0	0	0	0	0	1	0	0	0	0	0	0	0	0	1	0	0	3	3	0	20
3	157084055	157084622	LINE/L2	L2b	DF03491532	0	0	0	0	0	0	0	0	0	0	0	1	0	0	0	0	0	0	1	0	0	0	1	3	3	0	20
10	1037577	1038269	LINE/L1	L1MC1	DF00407350	0	0	0	0	0	0	0	0	0	0	0	1	0	0	0	0	0	0	0	0	1	0	1	3	3	0	20
5	138344555	138344794	SINE/MIR	MIR	DF04152080	0	0	0	0	0	0	1	0	0	0	0	1	0	0	0	0	0	0	0	0	0	0	1	3	3	0	20
13	49029725	49031106	LINE/L1	L1MB7	DF01329405	0	0	1	0	0	0	0	0	0	0	0	0	0	0	0	0	0	0	1	1	0	0	0	3	3	0	20
17	32398661	32399252	DNA/hAT-Charlie	Charlie1a	DF02045097	0	0	0	0	0	0	0	0	0	0	0	1	0	0	0	0	0	0	0	0	1	0	1	3	3	0	20
17	58960004	58960409	LTR/ERVL-MaLR	MLT1K	DF02107322	0	0	0	0	0	0	0	0	0	0	0	1	0	0	0	0	0	0	1	0	1	0	0	3	3	0	20
10	133685649	133690462	Satellite	BSR/Beta	DF00733390	0	0	0	0	0	0	0	0	0	1	0	1	0	0	0	0	0	0	1	0	0	0	0	3	3	0	20
10	91243952	91246163	LINE/L2	L2a	DF00649367	0	0	1	0	0	0	0	0	0	0	0	0	0	0	0	0	0	0	0	1	0	0	1	3	3	0	20
10	78043851	78044197	DNA/TcMar-Tigger	MER44D	DF00623491	0	0	0	0	0	0	0	0	0	0	0	1	1	0	0	0	0	0	0	0	1	0	0	3	3	0	20
9	120925219	120925337	SINE/MIR	MIR	DF05356516	0	0	0	0	0	0	0	1	0	0	0	0	0	0	1	0	0	0	0	1	0	0	0	3	3	0	20
11	83321296	83325453	LINE/L1	L1MA4A	DF00896675	0	0	0	0	0	0	0	0	0	0	0	1	0	0	0	0	0	0	1	1	0	0	0	3	3	0	20
17	43367912	43368081	snRNA	U2	DF02071229	0	0	0	0	0	0	0	1	0	0	0	0	0	0	0	0	0	0	0	1	1	0	0	3	3	0	20
2	28831679	28832843	LINE/L2	L2a	DF02502079	0	0	1	0	0	0	0	0	0	0	0	1	0	0	0	0	0	0	0	0	1	0	0	3	3	0	20
1	100947080	100950115	LINE/L1	L1P2	DF00225514	0	0	0	0	0	0	0	0	0	0	0	0	0	0	0	0	0	0	1	1	1	0	0	3	3	0	20
17	8246605	8246912	SINE/Alu	AluSc	DF01998448	0	0	0	0	0	0	0	0	0	0	0	0	1	0	0	0	0	0	1	0	1	0	0	3	3	0	20
7	105004661	105004803	SINE/MIR	MIRb	DF04762835	0	0	0	0	0	0	0	0	0	0	0	0	0	0	0	0	0	0	1	1	1	0	0	3	3	0	20
7	105003283	105003581	SINE/Alu	AluSx	DF04762831	0	0	0	0	0	0	0	0	0	0	0	0	0	0	0	0	0	0	1	1	0	0	1	3	3	0	20
6	43634859	43635604	LINE/L2	L2b	DF04339971	0	0	0	0	0	0	0	0	0	0	0	1	0	0	0	0	0	0	1	0	1	0	0	3	3	0	20
2	190960361	190960675	SINE/Alu	AluJb	DF02799935	0	0	0	0	0	0	0	0	0	0	0	1	1	0	0	0	0	0	0	0	0	0	1	3	3	0	20
13	48972690	48973929	LINE/L2	L2b	DF01329294	0	0	0	0	0	0	0	0	0	0	0	0	1	0	0	0	0	0	0	1	1	0	0	3	3	0	20
3	158921713	158923246	LINE/L1	L1ME3A	DF03494756	0	0	0	0	0	0	0	0	0	0	0	1	0	0	0	0	0	0	1	0	0	0	1	3	3	0	20
2	171759467	171761189	LINE/L1	L1PA7	DF02766524	0	0	1	0	0	0	0	0	0	0	0	1	0	0	0	0	0	0	0	0	1	0	0	3	3	0	20
2	171755566	171759165	LINE/L1	L1PA7	DF02766522	0	0	1	0	0	0	0	0	0	0	0	1	0	0	0	0	0	0	0	0	1	0	0	3	3	0	20
7	8096325	8102268	LINE/L1	L1PA7	DF04579131	0	0	0	0	0	0	0	0	0	0	0	1	0	0	0	0	0	0	1	1	0	0	0	3	3	0	20
14	54822812	54824948	LINE/L1	L1M4c	DF01507846	0	0	0	0	0	0	0	0	0	0	0	0	0	0	0	0	0	0	0	1	1	0	1	3	3	0	20
5	58434533	58436322	DNA/TcMar-Tigger	Tigger1	DF04009607	0	0	0	0	0	0	0	0	0	0	0	1	1	0	0	0	0	0	1	0	0	0	0	3	3	0	20
10	87935101	87935724	DNA/hAT-Charlie	Charlie24	DF00642881	0	0	0	0	0	0	0	0	0	0	0	1	0	0	0	0	0	0	1	1	0	0	0	3	3	0	20
10	87935741	87936975	DNA/hAT-Charlie	Charlie24	DF00642882	0	0	0	0	0	1	0	0	0	0	0	0	0	0	0	0	0	0	1	1	0	0	0	3	3	0	20
10	87937215	87937601	DNA/TcMar-Tigger	Tigger10	DF00642883	0	0	0	0	0	0	0	0	0	0	1	0	0	0	0	0	0	0	1	1	0	0	0	3	3	0	20
14	30659871	30661072	LINE/L1	L1MC5a	DF01463280	1	0	0	0	0	0	0	0	0	0	0	1	0	0	0	0	0	0	0	1	0	0	0	3	3	0	20
X	102867986	102870213	LINE/L1	L1PA10	DF05777462	0	0	0	0	0	0	0	0	0	0	0	1	0	0	0	0	0	0	1	1	0	0	0	3	3	0	20
6	27478812	27478894	tRNA	tRNA-Ser-TCY	DF04303174	0	0	0	0	0	0	0	0	0	0	0	1	0	0	0	0	0	0	0	1	1	0	0	3	3	0	20
13	49147574	49150094	LINE/L1	L1M2	DF01329640	0	0	0	0	0	0	0	0	0	0	0	0	0	0	0	0	0	0	1	1	0	0	1	3	3	0	20
6	126382255	126384277	LINE/L1	L1PREC2	DF04480826	0	0	0	0	0	0	0	0	0	0	0	1	0	0	0	0	0	0	1	0	1	0	0	3	3	0	20
11	85549544	85550659	LTR/ERV1	MER41B	DF00901109	0	0	0	0	0	0	0	0	0	0	0	1	0	0	0	0	0	0	1	0	1	0	0	3	3	0	20
9	99235098	99235765	LTR/ERVL	LTR101_Mam	DF05307860	0	0	0	0	0	0	0	0	0	0	0	1	0	0	0	0	0	0	0	1	0	0	1	3	3	0	20
5	141232540	141233573	LINE/L2	L2c	DF04158495	0	0	0	0	0	0	0	0	0	0	0	1	0	0	0	0	0	0	1	0	1	0	0	3	3	0	20
14	38975195	38981649	LINE/L1	L1PA7	DF01479607	0	0	0	0	0	0	0	0	0	0	0	1	0	0	0	0	0	0	1	0	1	0	0	3	3	0	20
13	19759588	19759877	SINE/Alu	AluSx3	DF01271368	0	0	0	0	0	0	0	0	0	0	0	1	0	0	0	0	0	0	1	0	1	0	0	3	3	0	20
12	105148341	105148480	LINE/L2	L2b	DF01196286	0	0	1	0	0	0	0	0	0	0	0	0	0	0	0	0	0	0	1	1	0	0	0	3	3	0	20
3	122704935	122705359	LINE/L1	L1MC5	DF03423849	0	0	0	0	0	0	0	0	0	0	0	0	0	0	0	0	0	0	1	1	0	0	1	3	3	0	20
22	39304783	39305078	SINE/Alu	AluSx	DF03166793	0	0	0	0	0	0	0	0	0	0	0	1	1	0	0	0	0	0	0	0	1	0	0	3	3	0	20
15	80961736	80965963	LINE/L1	L1PA6	DF01744312	0	0	1	0	0	0	0	0	0	0	0	1	0	0	0	0	0	0	0	1	0	0	0	3	3	0	20
3	178948424	178949296	DNA/TcMar-Tigger	Tigger3b	DF03530543	0	0	1	0	0	0	0	0	0	0	0	1	0	0	0	0	0	0	1	0	0	0	0	3	3	0	20
3	178950243	178950664	LTR/ERVL-MaLR	MLT1C2	DF03530548	0	0	1	0	1	0	0	0	0	0	0	1	0	0	0	0	0	0	0	0	0	0	0	3	3	0	20
14	76199062	76199613	LINE/L1	L1ME3D	DF01553081	0	0	0	0	1	0	0	0	0	0	1	0	0	0	0	0	0	0	0	1	0	0	0	3	3	0	20
11	28136533	28139656	LTR/ERV1	LTR25-int	DF00787814	0	0	0	0	0	1	0	0	0	0	0	0	0	0	0	0	0	0	1	1	0	0	0	3	3	0	20
9	5045395	5046707	LINE/L1	L1MB3	DF05151751	0	0	0	0	0	0	0	0	0	0	0	0	0	0	0	0	0	0	1	0	1	0	1	3	3	0	20
17	870461	870771	SINE/Alu	AluJb	DF01980123	0	0	0	0	0	0	0	0	0	0	1	0	1	0	0	0	0	0	0	0	1	0	0	3	3	0	20
12	19606681	19607893	LTR/ERVL	ERVL-E-int	DF01035664	0	0	1	0	0	0	0	0	0	0	0	1	0	0	0	0	0	0	0	0	0	0	1	3	3	0	20
7	2265830	2266132	SINE/Alu	AluJr	DF04565065	0	0	0	0	0	0	0	0	0	0	0	1	0	0	0	0	0	0	1	0	1	0	0	3	3	0	20
10	110281089	110282357	LINE/L1	L1MC5a	DF00690483	0	0	1	0	0	0	0	0	0	0	0	1	0	0	0	0	0	0	1	0	0	0	0	3	3	0	20
5	143040471	143041043	LINE/L2	L2a	DF04162706	0	0	0	0	0	0	0	0	0	0	0	0	0	0	0	0	0	0	1	1	1	0	0	3	3	0	20
3	156545168	156545435	DNA/hAT-Charlie	MER112	DF03490540	1	0	1	0	0	0	0	0	0	0	0	0	0	0	0	0	0	0	0	1	0	0	0	3	3	0	20
4	15830794	15833227	LINE/L1	L1MA2	DF03604968	0	1	0	0	0	0	0	0	0	0	0	0	0	0	0	0	0	0	0	1	0	0	1	3	3	0	20
2	162204827	162205217	LTR/ERV1	MER57C2	DF02749341	0	0	0	0	0	1	0	0	0	0	0	0	1	0	0	0	0	0	1	0	0	0	0	3	3	0	20
12	103948954	103949232	SINE/Alu	AluSx1	DF01193339	1	0	0	0	0	0	0	0	0	0	0	0	1	0	0	0	0	0	0	0	1	0	0	3	3	0	20
6	108701950	108703473	LINE/L1	L1MEg	DF04449228	0	0	0	0	0	0	0	0	0	0	0	1	0	0	0	0	0	0	0	0	1	0	1	3	3	0	20
1	88926616	88931259	LTR/ERV1	HERV17-int	DF00202267	0	0	0	0	0	0	0	0	0	0	0	1	0	0	0	0	0	0	0	1	1	0	0	3	3	0	20
6	159650483	159651244	DNA/hAT-Tip100	MER45B	DF04543521	0	0	0	0	0	0	0	0	0	0	0	1	0	0	0	0	0	0	0	0	1	0	1	3	3	0	20
17	35859090	35860114	LINE/L2	L2a	DF02053123	0	0	0	0	0	0	0	0	0	0	0	1	0	0	0	0	0	0	0	0	1	0	1	3	3	0	20
6	111454999	111455656	LINE/L2	L2c	DF04455158	0	0	0	0	0	1	0	0	0	0	0	0	0	0	0	0	0	0	0	1	0	0	1	3	3	0	20
10	73224906	73226058	DNA/TcMar-Tigger	Tigger3b	DF00613216	0	0	0	0	0	0	0	0	0	0	0	1	0	0	0	0	0	0	1	0	1	0	0	3	3	0	20
18	51112371	51116481	LTR/ERV1	HERV9NC-int	DF02248598	0	0	0	0	0	0	0	0	0	0	0	1	0	0	0	0	0	0	1	0	1	0	0	3	3	0	20
9	120924776	120924922	SINE/MIR	MIR3	DF05356515	0	0	0	0	0	0	0	1	0	0	0	0	0	0	0	0	0	0	0	1	0	0	1	3	3	0	20
9	120925549	120925682	SINE/MIR	MIRc	DF05356517	0	0	0	0	0	0	0	1	0	0	0	0	0	0	1	0	0	0	0	1	0	0	0	3	3	0	20
9	120923903	120924217	DNA/TcMar-Tigger	MER46C	DF05356512	0	0	0	0	0	0	0	0	0	0	0	0	0	0	1	0	0	0	0	1	0	0	1	3	3	0	20
15	44685631	44687987	LINE/L1	L1PA7	DF01666240	0	0	0	0	0	0	0	0	0	0	0	1	0	0	0	0	0	0	0	1	1	0	0	3	3	0	20
9	19367764	19368131	LINE/L1	L1MB8	DF05177361	0	0	0	0	0	0	0	0	0	0	0	1	0	0	0	0	0	0	1	0	1	0	0	3	3	0	20
X	45216916	45220859	LINE/L1	L1PA13	DF05685430	0	0	0	0	0	0	0	0	0	0	0	1	0	0	0	0	0	0	1	0	1	0	0	3	3	0	20
3	101568039	101568763	LINE/L2	L2a	DF03386054	0	0	0	0	0	0	0	0	0	0	0	1	1	0	0	0	0	0	0	0	1	0	0	3	3	0	20
7	50600835	50603065	LINE/L1	L1MC5a	DF04657505	1	0	1	0	0	0	0	0	0	0	0	0	0	0	0	0	0	0	1	0	0	0	0	3	3	0	20
9	120915874	120916448	LINE/L1	L1ME1	DF05356494	0	0	0	0	0	0	0	0	0	0	0	0	0	0	1	0	0	0	0	1	0	0	1	3	3	0	20
10	27578291	27578775	LTR/ERVL-MaLR	MLT1F2	DF00529918	0	0	0	0	0	0	0	0	0	0	0	1	0	0	0	0	0	0	0	0	1	0	1	3	3	0	20
17	61998598	61998898	SINE/Alu	AluSx3	DF02114729	0	0	0	0	0	0	0	0	0	0	0	1	0	0	0	0	0	0	1	1	0	0	0	3	3	0	20
4	17808748	17809050	SINE/Alu	AluSx	DF03609695	0	0	0	0	0	0	0	0	0	0	1	0	0	0	0	0	0	0	1	0	1	0	0	3	3	0	20
19	48882411	48882938	LTR/ERV1	LTR10C	DF02418684	0	0	0	0	0	0	0	0	0	0	0	1	1	0	0	0	0	0	0	0	1	0	0	3	3	0	20
6	28896222	28896328	tRNA	tRNA-Leu-TTG	DF04306327	0	0	0	0	0	1	0	0	0	1	0	0	0	0	0	0	0	0	0	0	1	0	0	3	3	0	20
8	42934396	42938691	LINE/L1	L1PA7	DF04950199	0	0	1	0	0	1	0	0	0	0	0	0	0	0	0	0	0	0	0	1	0	0	0	3	3	0	20
3	146486072	146489330	LINE/L1	L1PA10	DF03472008	0	0	0	0	0	0	0	0	0	0	0	1	0	0	0	0	0	0	1	0	0	0	1	3	3	0	20
3	146483511	146485710	LINE/L1	L1PA10	DF03472006	0	0	0	0	0	0	0	0	0	0	0	1	1	0	0	0	0	0	0	0	0	0	1	3	3	0	20
2	101932600	101934025	LINE/L1	L1MB4	DF02639039	0	0	0	0	0	0	0	0	0	0	0	1	0	0	0	0	0	0	1	0	0	0	1	3	3	0	20
5	142985510	142991597	LINE/L1	L1PA5	DF04162599	0	0	0	0	0	0	0	0	0	0	0	1	0	0	0	0	0	0	1	1	0	0	0	3	3	0	20
11	83216860	83220458	LTR/ERV1	HERV30-int	DF00896452	0	0	0	0	0	0	0	0	0	0	0	1	0	0	0	0	0	0	0	0	1	0	1	3	3	0	20
11	83220609	83222272	LINE/L1	L1M3f	DF00896454	0	0	0	0	0	0	0	0	0	0	0	1	0	0	0	0	0	0	1	0	0	0	1	3	3	0	20
10	89400081	89401093	LINE/L1	L1MB3	DF00645781	0	0	0	0	0	0	0	0	0	0	0	0	1	0	0	0	0	0	1	1	0	0	0	3	3	0	20
6	159631271	159632137	LINE/L1	HAL1	DF04543468	0	0	0	0	0	0	0	0	0	0	0	1	0	0	0	0	0	0	0	0	1	0	1	3	3	0	20
11	76481343	76484652	LINE/L1	L1PA7	DF00881037	0	0	1	0	0	0	0	0	0	0	0	1	0	0	0	0	0	0	0	1	0	0	0	3	3	0	20
2	162340252	162341182	LINE/L2	L2a	DF02749571	0	0	0	0	0	0	0	0	0	0	0	0	0	0	0	0	0	0	1	1	0	0	1	3	3	0	20
12	68864163	68864461	SINE/Alu	AluSx1	DF01124950	0	0	0	0	0	0	0	0	0	0	0	1	0	0	0	0	0	0	1	0	1	0	0	3	3	0	20
21	14800652	14806254	LINE/L1	L1PA4	DF03047573	0	0	1	0	0	0	0	0	0	0	0	1	0	0	0	0	0	0	1	0	0	0	0	3	3	0	20
1	224395494	224395971	DNA/TcMar-Tigger	Tigger12	DF00461415	0	0	0	0	0	1	0	0	0	0	0	1	0	0	0	0	0	0	0	1	0	0	0	3	3	0	20
7	135172192	135172845	LTR/ERV1	Harlequin-int	DF04818724	0	0	0	0	1	0	0	0	0	0	0	0	0	0	0	1	0	0	0	1	0	0	0	3	3	0	20
14	76221056	76222143	LINE/L1	L1MC1	DF01553124	0	0	0	0	0	0	0	0	0	0	0	1	0	0	0	0	0	0	1	0	1	0	0	3	3	0	20
3	132562395	132564549	LINE/L1	L1ME1	DF03444614	0	0	1	0	0	0	0	0	0	0	0	1	0	0	0	0	0	0	0	1	0	0	0	3	3	0	20
6	31429886	31435550	LTR/ERVL	HERVL-int	DF04311468	0	0	0	0	0	0	0	0	0	0	0	1	0	0	0	0	0	0	1	0	0	0	1	3	3	0	20
17	7486434	7487016	LINE/L1	L1M5	DF01996594	0	0	0	0	0	0	0	1	0	0	0	1	0	0	0	0	0	0	0	0	0	0	1	3	3	0	20
17	7485856	7486312	LINE/L2	L2a	DF01996593	0	0	0	0	0	0	0	1	0	0	0	1	0	0	0	0	0	0	0	0	0	0	1	3	3	0	20
12	121030858	121031178	SINE/Alu	AluJb	DF01239716	0	0	0	0	0	0	0	0	0	0	0	0	0	0	0	0	0	0	1	1	0	0	1	3	3	0	20
7	141854184	141856347	LINE/L1	L1PBa	DF04833476	0	0	0	0	0	0	0	0	0	0	0	1	0	0	0	0	0	0	1	0	0	0	1	3	3	0	20
2	101926639	101928237	LTR/ERVL-MaLR	THE1D-int	DF02639026	0	0	0	0	0	0	0	0	0	0	0	1	0	0	0	0	0	0	1	0	0	0	1	3	3	0	20
6	159704142	159710272	LINE/L1	L1PA5	DF04543654	0	0	0	0	0	1	0	0	0	0	0	0	0	0	0	0	0	0	1	0	0	0	1	3	3	0	20
10	89788702	89790543	LINE/L1	L1PBa1	DF00646607	0	0	0	0	0	0	0	0	0	0	0	1	0	0	0	0	0	0	1	0	1	0	0	3	3	0	20
16	71426860	71426947	LINE/L1	L1ME4b	DF01934392	0	0	0	0	0	0	0	0	0	0	0	1	0	0	0	0	0	0	1	0	1	0	0	3	3	0	20
2	190966637	190966840	DNA/TcMar-Tigger	Tigger19a	DF02799941	0	0	0	0	1	0	0	0	0	0	0	1	1	0	0	0	0	0	0	0	0	0	0	3	3	0	20
5	72925319	72926708	LTR/ERV1	LTR12E	DF04037306	0	0	0	0	0	0	0	0	0	0	0	1	0	0	0	0	0	0	0	0	1	0	1	3	3	0	20
5	143017426	143019069	LINE/L1	L1ME5	DF04162660	0	0	0	0	0	0	0	0	0	0	0	1	0	0	0	0	0	0	1	1	0	0	0	3	3	0	20
5	143266815	143270138	LINE/L1	L1MC1	DF04163134	0	0	0	0	0	0	0	0	0	0	0	1	0	0	0	0	0	0	1	0	0	0	1	3	3	0	20
7	83989326	83995342	LINE/L1	L1PA2	DF04722440	0	0	0	0	0	1	0	0	0	0	0	0	0	0	0	0	0	0	0	1	0	0	1	3	3	0	20
7	141892184	141894850	LINE/L1	L1MC3	DF04833535	0	0	0	0	0	0	0	0	0	0	0	0	0	0	0	0	0	0	1	0	1	0	1	3	3	0	20
2	232861355	232861805	LTR/ERVL-MaLR	MLT1J	DF02917980	0	0	0	0	0	0	0	0	0	0	0	1	0	0	0	0	0	0	0	0	1	0	1	3	3	0	20
17	68051692	68052958	LTR/ERV1	LTR12E	DF02129206	0	0	0	0	0	0	0	0	0	0	0	1	1	0	0	0	0	0	0	0	1	0	0	3	3	0	20
8	81571964	81575776	LINE/L1	L1PB1	DF05015104	0	0	0	0	0	0	0	0	0	0	0	1	0	0	0	0	0	0	1	0	1	0	0	3	3	0	20
14	81207519	81209106	LTR/ERVL-MaLR	THE1A-int	DF01563752	0	0	1	0	0	0	0	0	0	0	0	0	0	0	0	0	0	0	0	1	0	0	1	3	3	0	20
2	152646370	152646652	DNA/hAT-Charlie	MER102c	DF02733088	0	0	0	0	0	0	0	0	0	0	0	1	0	0	0	0	0	0	1	0	1	0	0	3	3	0	20
10	94659929	94663710	LINE/L1	L1PA5	DF00657560	0	0	0	0	0	0	0	0	0	0	0	1	0	0	0	0	0	0	1	0	1	0	0	3	3	0	20
12	75450349	75453253	LINE/L1	L1MCa	DF01137040	0	0	0	0	0	0	0	0	0	0	0	1	0	0	0	0	0	0	1	0	1	0	0	3	3	0	20
3	178839864	178841461	LTR/ERVL-MaLR	THE1D-int	DF03530361	0	0	1	0	0	0	0	0	0	0	0	0	0	0	0	0	0	0	1	0	0	0	1	3	3	0	20
5	14435414	14436054	LINE/L1	L1MC4a	DF03937353	0	0	1	0	0	1	0	0	0	0	0	0	0	0	0	0	0	0	0	0	0	0	1	3	3	0	20
5	149484535	149484835	SINE/Alu	AluSc8	DF04176288	0	0	0	0	0	0	0	0	0	0	0	1	0	0	0	0	0	0	1	0	1	0	0	3	3	0	20
3	132662358	132662501	LINE/L2	L2c	DF03444774	1	0	1	0	0	0	0	0	0	0	0	0	0	0	0	0	0	0	0	1	0	0	0	3	3	0	20
3	197899703	197901146	LINE/L1	L1M1	DF03571791	0	0	0	0	0	0	0	0	0	0	0	1	0	0	0	0	0	0	0	0	1	0	1	3	3	0	20
15	56601247	56603529	DNA/hAT-Charlie	Cheshire	DF01689397	0	0	0	0	0	0	0	0	0	0	0	1	0	0	0	0	0	0	1	1	0	0	0	3	3	0	20
3	178930508	178932986	LINE/L1	L1PA14	DF03530514	0	0	1	0	0	0	0	0	0	0	0	1	0	0	0	0	0	0	1	0	0	0	0	3	3	0	20
16	31935651	31937535	LINE/L1	L1M4c	DF01872804	0	0	0	0	0	0	0	0	0	0	0	1	0	0	0	0	0	0	0	0	1	0	1	3	3	0	20
5	66103162	66104094	LINE/L1	L1PBa1	DF04023470	0	0	0	0	0	0	0	0	0	0	0	1	0	0	0	0	0	0	0	0	1	0	1	3	3	0	20
4	173203391	173205456	LINE/L1	L1M4c	DF03884251	0	0	1	0	0	0	0	0	0	0	0	1	0	0	0	0	0	0	0	0	1	0	0	3	3	0	20
16	50747155	50747611	DNA/TcMar-Tigger	Tigger15a	DF01888332	0	0	0	0	0	0	0	0	0	0	0	1	0	0	0	0	0	0	1	1	0	0	0	3	3	0	20
6	111474119	111474651	DNA/hAT-Charlie	Charlie17b	DF04455194	0	0	0	0	0	1	0	0	0	0	0	0	0	0	0	0	0	0	0	1	0	0	1	3	3	0	20
6	111475024	111475977	LINE/L1	L1ME4b	DF04455197	0	0	0	0	0	1	0	0	0	0	0	0	0	0	0	0	0	0	0	1	0	0	1	3	3	0	20
2	101906328	101907880	LTR/ERVL-MaLR	THE1C-int	DF02638990	0	0	0	0	0	0	0	0	0	0	0	1	0	0	0	0	0	0	1	0	0	0	1	3	3	0	20
2	101910645	101911616	LINE/L1	L1MD2	DF02638997	0	0	0	0	0	0	0	0	0	0	0	1	0	0	0	0	0	0	1	0	0	0	1	3	3	0	20
2	101909262	101910629	LINE/L1	HAL1	DF02638996	0	0	0	0	0	0	0	0	0	0	0	1	0	0	0	0	0	0	1	0	0	0	1	3	3	0	20
18	51092864	51095784	LINE/L1	L1PA7	DF02248555	0	0	0	0	0	0	0	0	0	0	0	1	0	0	0	0	0	0	0	0	1	0	1	3	3	0	20
6	49494027	49495466	LTR/ERVL-MaLR	MSTB1-int	DF04351052	0	0	0	0	0	0	0	0	0	0	0	1	1	0	0	0	0	0	1	0	0	0	0	3	3	0	20
11	87331083	87331733	LINE/L1	L1MEc	DF00904943	0	0	0	0	0	0	0	0	0	0	0	1	0	0	0	0	0	0	1	1	0	0	0	3	3	0	20
5	43286083	43286854	LTR/ERVL	ERV3-16A3_I-int	DF03990159	0	0	1	0	0	0	0	0	0	0	0	1	1	0	0	0	0	0	0	0	0	0	0	3	3	0	20
13	49956826	49958050	DNA/hAT-Tip100	FordPrefect	DF01331564	0	0	0	0	0	0	0	0	0	0	0	0	0	0	0	0	0	0	0	1	1	0	1	3	3	0	20
1	213266952	213269689	LINE/L1	L1ME1	DF00404432	0	0	1	0	0	0	0	0	0	0	0	0	0	0	0	0	0	0	0	1	0	0	1	3	3	0	20
1	31459371	31466684	LTR/ERV1	HERVIP10F-int	DF00075926	0	0	0	0	0	0	0	0	0	0	0	1	0	0	0	0	0	0	0	1	1	0	0	3	3	0	20
5	66192431	66196387	LINE/L1	L1M1	DF04023643	0	0	0	0	0	0	0	0	0	0	0	1	0	0	0	0	0	0	1	0	0	0	1	3	3	0	20
22	24578105	24578645	LINE/L1	L1ME1	DF03127787	0	0	0	0	0	0	0	0	0	0	0	1	0	0	0	0	0	0	0	0	1	0	1	3	3	0	20
4	76952978	76953109	LINE/CR1	L3	DF03716337	0	0	0	0	0	1	0	0	0	0	0	0	0	0	0	0	0	0	0	1	0	0	1	3	3	0	20
15	44682791	44685327	LINE/L1	L1PA7	DF01666238	0	0	0	0	0	0	0	0	0	0	0	1	0	0	0	0	0	0	1	1	0	0	0	3	3	0	20
11	10815523	10816737	LINE/L2	L2a	DF00753433	0	0	0	0	0	0	0	0	0	0	0	1	0	0	0	0	0	0	1	0	1	0	0	3	3	0	20
11	10817413	10817933	LTR/ERVL-MaLR	MLT1D	DF00753437	0	0	0	0	0	0	0	0	0	0	0	1	0	0	0	0	0	0	1	0	1	0	0	3	3	0	20
2	121373424	121375026	LTR/ERVL-MaLR	MSTA-int	DF02676048	0	0	1	0	0	1	0	0	0	0	0	0	0	0	0	0	0	0	0	1	0	0	0	3	3	0	20
4	168341458	168344062	LINE/L1	L1PA5	DF03875761	0	0	0	0	0	0	0	0	0	0	0	1	0	0	0	0	0	0	1	0	1	0	0	3	3	0	20
4	168348248	168350206	LINE/L1	L1PA14	DF03875765	0	0	0	0	0	0	0	0	0	0	0	1	0	0	0	0	0	0	0	0	1	0	1	3	3	0	20
9	120897698	120898001	SINE/Alu	AluSx3	DF05356442	0	0	0	1	1	0	0	0	0	0	0	0	0	0	0	0	0	0	0	1	0	0	0	3	3	0	20
7	26154548	26154833	SINE/Alu	AluJb	DF04610393	0	0	0	0	0	0	0	0	0	0	0	1	0	0	0	0	0	0	1	1	0	0	0	3	3	0	20
1	78648318	78648605	LTR/ERVL-MaLR	THE1C	DF00184038	0	0	0	1	0	0	0	0	0	0	0	0	0	0	0	1	0	0	0	1	0	0	0	3	3	0	20
1	78646414	78646789	LTR/ERVL-MaLR	THE1C	DF00184036	0	0	0	1	0	0	0	0	0	0	0	0	0	0	0	1	0	0	0	1	0	0	0	3	3	0	20
11	28181236	28184594	LINE/L1	L1PA7	DF00787893	0	0	0	0	0	1	0	0	0	0	0	0	0	0	0	0	0	0	1	1	0	0	0	3	3	0	20
9	21312985	21315050	LINE/L1	L1MA5A	DF05180901	0	0	0	0	0	0	0	0	0	0	0	1	1	0	0	0	0	0	1	0	0	0	0	3	3	0	20
3	146474412	146475442	LINE/L1	L1PA10	DF03471999	0	0	0	0	0	0	0	0	0	0	0	1	0	0	0	0	0	0	1	0	0	0	1	3	3	0	20
10	99706999	99707066	SINE/MIR	MIR	DF00668550	1	0	0	0	0	0	0	0	0	0	0	0	0	0	0	0	0	0	1	1	0	0	0	3	3	0	20
6	159616834	159617718	LTR/ERVL	LTR41B	DF04543432	0	0	0	0	0	0	0	0	0	0	0	1	0	0	0	0	0	0	0	0	1	0	1	3	3	0	20
5	93442076	93448204	LINE/L1	L1PA5	DF04074416	0	0	0	0	0	1	0	0	0	0	0	0	0	0	0	0	0	0	1	0	1	0	0	3	3	0	20
1	156191202	156192038	LINE/L1	L1MB5	DF00293437	0	0	0	0	1	0	0	0	0	0	0	1	0	0	0	0	0	0	0	0	0	0	1	3	3	0	20
17	80365904	80366182	LTR/ERVL-MaLR	MLT1J-int	DF02156204	0	0	0	1	0	0	0	1	0	0	0	0	0	0	0	0	0	0	0	0	1	0	0	3	3	0	20
20	4077574	4079159	LINE/L1	L1MD2	DF02838386	0	0	0	0	0	0	0	0	0	0	1	0	0	0	0	0	0	0	1	0	0	0	1	3	3	0	20
4	113414973	113417418	LINE/L1	L1PB1	DF03780934	1	0	0	0	0	0	0	0	0	0	0	1	0	0	0	1	0	0	0	0	0	0	0	3	3	0	20
3	101843457	101844985	DNA/hAT-Charlie	Charlie1	DF03386719	0	0	0	0	0	0	0	0	0	0	0	0	0	0	0	0	0	0	1	1	0	0	1	3	3	0	20
7	80943049	80943187	SINE/Alu	AluY	DF04717355	0	0	0	0	0	0	0	0	0	0	1	0	1	0	0	0	0	0	1	0	0	0	0	3	3	0	20
1	193280586	193281540	LINE/L1	L1MC4	DF00364350	0	0	1	0	0	0	0	0	0	0	0	1	0	0	0	0	0	0	0	0	0	0	1	3	3	0	20
1	186540387	186542052	LINE/L1	L1M2	DF00352951	0	0	0	0	0	0	0	0	0	0	0	1	0	0	0	0	0	0	1	0	1	0	0	3	3	0	20
3	88172421	88174639	LTR/ERVL	ERVL-B4-int	DF03369667	0	0	0	0	0	0	0	0	0	0	0	1	0	0	0	0	0	0	1	0	0	0	1	3	3	0	20
21	34161338	34164382	LTR/ERV1	MER61-int	DF03083525	0	0	1	0	0	0	0	0	0	0	0	0	0	0	0	0	0	0	0	0	1	0	1	3	3	0	20
14	56359598	56364841	LINE/L1	L1PA7	DF01511193	0	0	0	0	0	0	0	0	0	1	0	1	0	0	0	0	0	0	1	0	0	0	0	3	3	0	20
10	58373962	58376843	LINE/L1	L1MEg	DF00582050	0	0	0	0	0	0	0	0	0	0	0	1	0	0	0	0	0	0	0	0	1	0	1	3	3	0	20
7	152160848	152161135	LINE/L2	L2c	DF04852733	0	0	0	0	0	0	0	0	0	0	0	1	0	0	0	0	0	0	0	1	0	0	1	3	3	0	20
4	44743991	44750132	LINE/L1	L1PA5	DF03663212	0	0	0	0	0	0	0	0	0	0	0	1	0	0	0	0	0	0	1	1	0	0	0	3	3	0	20
1	110919586	110921503	LINE/L1	L1MC1	DF00243187	0	0	0	0	0	0	0	0	0	0	0	1	0	0	0	0	0	0	1	0	0	0	1	3	3	0	20
8	54160316	54161885	LTR/ERVL-MaLR	THE1A-int	DF04964942	0	0	0	0	0	0	0	0	0	0	0	1	1	0	0	0	0	0	0	0	1	0	0	3	3	0	20
1	244391474	244392722	LTR/ERVL	ERVL-B4-int	DF00502406	0	0	0	0	0	0	0	0	0	0	0	1	0	0	0	0	0	0	0	0	1	0	1	3	3	0	20
2	216507672	216508089	LTR/ERVL	LTR33	DF02883698	0	0	0	0	0	0	0	0	0	0	0	1	0	0	0	0	0	0	1	0	1	0	0	3	3	0	20
7	30624221	30624757	LINE/L1	L1MEc	DF04619066	1	0	1	0	0	0	0	0	0	0	0	0	0	0	0	0	0	0	0	1	0	0	0	3	3	0	20
6	109357377	109359918	LTR/ERVL	ERVL-E-int	DF04450570	0	0	0	0	0	0	0	0	0	0	0	1	1	0	0	0	0	0	0	0	0	0	1	3	3	0	20
17	29254858	29255143	SINE/Alu	AluSx1	DF02036932	0	0	0	0	0	0	0	0	0	0	0	1	0	0	0	0	0	0	0	0	1	0	1	3	3	0	20
5	88180905	88182326	LINE/L1	L1ME3A	DF04065861	0	0	1	0	0	0	0	0	0	0	0	1	0	0	0	0	0	0	0	0	1	0	0	3	3	0	20
4	13316790	13321120	LINE/L1	L1MA5	DF03599589	0	0	1	0	0	0	0	0	0	0	0	0	0	0	0	0	0	0	0	1	0	0	1	3	3	0	20
12	19530921	19531967	LINE/L1	L1MCa	DF01035488	0	0	1	0	0	0	0	0	0	0	0	1	0	0	0	0	0	0	0	1	0	0	0	3	3	0	20
15	89297979	89298887	LINE/L1	L1ME3A	DF01761922	0	0	0	0	0	0	0	1	0	0	1	0	0	0	0	0	0	0	0	1	0	0	0	3	3	0	20
8	74369126	74371378	LINE/L1	L1ME2	DF05002425	0	0	1	0	0	0	0	0	0	0	0	0	0	0	0	0	0	0	1	1	0	0	0	3	3	0	20
1	75856294	75862418	LINE/L1	L1PA7	DF00178519	0	0	0	0	0	0	0	0	0	0	0	1	0	0	0	0	0	0	1	0	1	0	0	3	3	0	20
1	172431616	172437728	LINE/L1	L1PA6	DF00325085	0	0	0	0	0	1	0	0	0	0	0	0	0	0	0	0	0	0	0	1	1	0	0	3	3	0	20
1	148279034	148279818	LINE/L1	L1MEc	DF00275319	1	0	0	0	0	0	0	0	0	0	0	0	0	0	0	1	0	0	0	1	0	0	0	3	3	0	20
3	98506432	98506902	LTR/ERVL-MaLR	MLT1G3	DF03380700	0	0	0	0	1	0	0	1	0	0	1	0	0	0	0	0	0	0	0	0	0	0	0	3	3	0	20
6	36639820	36640088	SINE/Alu	AluSx	DF04323832	0	0	0	0	0	0	0	0	0	0	0	1	0	0	0	0	0	0	1	0	1	0	0	3	3	0	20
9	33085450	33091565	LINE/L1	L1PA5	DF05200937	0	0	0	0	0	0	0	0	0	0	0	1	0	0	0	0	0	0	0	0	1	0	1	3	3	0	20
4	139035436	139036236	LINE/L2	L2a	DF03823277	0	0	1	0	0	0	0	0	0	0	0	1	0	0	0	0	0	0	0	1	0	0	0	3	3	0	20
2	162308378	162308677	SINE/Alu	AluSx	DF02749511	0	0	0	1	0	0	0	0	0	0	1	0	0	0	0	0	0	0	0	1	0	0	0	3	3	0	20
5	132473307	132473517	SINE/MIR	MIRc	DF04140199	0	0	0	0	0	0	0	0	0	0	0	1	1	0	0	0	0	0	1	0	0	0	0	3	3	0	20
6	111406061	111406761	LINE/L2	L2c	DF04455065	0	0	0	0	0	1	0	0	0	0	0	0	0	0	0	0	0	0	0	1	0	0	1	3	3	0	20
10	26979388	26981148	LTR/ERV1	PRIMA4-int	DF00528656	0	0	0	0	0	0	0	0	0	0	0	1	0	0	0	0	0	0	1	0	1	0	0	3	3	0	20
13	49981662	49982378	LINE/L2	L2a	DF01331629	0	0	0	0	0	1	0	0	0	0	0	0	0	0	0	0	0	0	0	1	1	0	0	3	3	0	20
2	64089804	64090768	LINE/L2	L2a	DF02571981	0	0	0	0	0	0	0	0	0	0	0	1	0	0	0	0	0	0	0	1	0	0	1	3	3	0	20
19	57300559	57300921	LINE/L1	L1M2a	DF02441325	1	0	0	0	0	1	0	0	0	0	0	0	0	0	0	0	0	0	0	1	0	0	0	3	3	0	20
1	222656272	222657610	LINE/L1	L1MEg	DF00457556	0	0	1	0	0	0	0	0	0	0	0	0	0	0	0	0	0	0	0	1	0	0	1	3	3	0	20
7	141814364	141815632	LTR/ERV1	MER110-int	DF04833412	0	0	0	0	0	0	0	0	0	0	0	1	0	0	0	0	0	0	1	0	0	0	1	3	3	0	20
9	122936344	122937053	LINE/L1	L1M4c	DF05361353	0	0	0	0	0	0	0	0	0	0	0	0	1	0	0	0	0	0	0	1	0	0	1	3	3	0	20
9	5147558	5149402	LINE/L1	L1P4a	DF05151869	0	0	0	0	0	0	0	0	0	0	0	1	0	0	0	0	0	0	1	0	0	0	1	3	3	0	20
9	5143954	5147148	LINE/L1	L1PA13	DF05151867	0	0	0	0	0	0	0	0	0	0	0	1	0	0	0	0	0	0	1	0	0	0	1	3	3	0	20
9	5140717	5143654	LINE/L1	L1PA13	DF05151865	0	0	0	0	0	0	0	0	0	0	0	1	0	0	0	0	0	0	1	0	0	0	1	3	3	0	20
10	32337664	32338764	LINE/L2	L2a	DF00540383	0	0	0	0	0	1	0	0	0	0	0	0	0	0	0	0	0	0	1	1	0	0	0	3	3	0	20
7	104990098	104990314	rRNA	LSU-rRNA_Hsa	DF04762804	0	0	0	0	0	0	0	0	0	0	0	0	0	0	0	0	0	0	1	1	0	0	1	3	3	0	20
22	36234718	36234940	SINE/MIR	MIR	DF03158497	0	0	0	0	0	0	0	0	0	0	0	0	0	0	0	0	0	0	1	1	0	0	1	3	3	0	20
13	79382595	79383194	LINE/CR1	L3	DF01381897	0	0	1	0	0	1	0	0	0	0	0	0	0	0	0	0	0	0	0	1	0	0	0	3	3	0	20
14	73129787	73132071	LTR/ERV1	HERVH-int	DF01545266	0	0	0	0	0	0	0	0	0	0	0	1	1	0	0	0	0	0	0	0	1	0	0	3	3	0	20
6	159515213	159518547	LINE/L1	L1PREC2	DF04543240	0	0	0	0	0	0	0	0	0	0	0	1	0	0	0	0	0	0	0	0	1	0	1	3	3	0	20
5	72933072	72935101	LTR/ERV1	HERV9-int	DF04037309	0	0	0	0	0	0	0	0	0	0	0	1	0	0	0	0	0	0	0	0	1	0	1	3	3	0	20
2	112005881	112006181	SINE/Alu	AluSx	DF02657491	0	0	1	0	0	0	0	0	0	0	0	0	0	0	0	0	0	0	0	0	1	0	1	3	3	0	20
7	130856518	130859911	LINE/L1	L1MA4	DF04810020	0	0	1	0	0	1	0	0	0	0	0	0	0	0	0	0	0	0	0	1	0	0	0	3	3	0	20
7	8068367	8069692	LINE/L1	L1PA15	DF04579083	0	0	0	0	0	1	0	0	0	0	0	0	0	0	0	0	0	0	1	1	0	0	0	3	3	0	20
16	14675952	14676398	LINE/L1	L1PB3	DF01823807	0	0	0	0	0	0	0	0	0	0	0	1	1	0	0	0	0	0	1	0	0	0	0	3	3	0	20
16	22298231	22298298	SINE/MIR	MIR	DF01845538	0	0	0	0	0	0	0	0	0	0	0	1	0	0	0	0	0	0	1	0	1	0	0	3	3	0	20
1	78661979	78662146	LINE/L2	L2d2	DF00184066	0	0	0	0	1	0	0	0	0	0	0	0	0	0	0	1	0	0	0	1	0	0	0	3	3	0	20
1	78658926	78659286	LINE/L2	L2b	DF00184060	0	0	0	0	0	0	0	0	0	0	0	0	0	0	0	1	0	0	0	1	0	0	1	3	3	0	20
1	78660812	78661061	DNA/TcMar-Tigger	MER2	DF00184062	0	0	0	0	0	0	0	0	0	0	0	0	0	0	0	1	0	0	1	1	0	0	0	3	3	0	20
17	43337358	43338398	LTR/ERVK	HERVK13-int	DF02071187	0	0	0	0	0	0	0	0	0	0	0	1	0	0	0	0	0	0	0	1	1	0	0	3	3	0	20
17	43334681	43335652	LTR/ERVK	LTR13A	DF02071185	0	0	0	0	0	0	0	0	0	0	0	1	0	0	0	0	0	0	0	1	1	0	0	3	3	0	20
12	104878329	104884475	LINE/L1	L1PA5	DF01195689	0	0	0	0	0	0	0	0	0	0	0	1	0	0	0	0	0	0	0	1	0	0	1	3	3	0	20
2	170112491	170119261	LTR/ERVK	HERVK22-int	DF02762906	0	0	0	0	0	0	0	0	0	0	0	1	0	0	0	0	0	0	1	0	1	0	0	3	3	0	20
2	9547260	9547767	LINE/L2	L2c	DF02461848	0	0	1	0	0	0	0	0	0	0	0	1	0	0	0	0	0	0	0	1	0	0	0	3	3	0	20
8	101175490	101176099	LINE/CR1	L3	DF05052061	0	0	0	0	0	0	0	0	0	0	0	1	0	0	0	0	0	0	0	0	1	0	1	3	3	0	20
20	1900095	1900383	SINE/Alu	AluSp	DF02832801	0	0	0	0	0	0	0	0	0	0	0	0	1	0	0	0	0	0	1	0	1	0	0	3	3	0	20
2	232863618	232864385	LINE/L1	L1MC5a	DF02917986	0	0	0	0	0	0	0	0	0	0	0	1	0	0	0	0	0	0	1	0	1	0	0	3	3	0	20
8	80739716	80742546	LTR/ERV1	HERV17-int	DF05013602	0	0	0	0	0	0	0	0	0	0	0	0	0	0	0	0	0	0	1	1	1	0	0	3	3	0	20
15	63142974	63143420	LTR/ERVL-MaLR	MLT1F-int	DF01703058	0	0	0	0	0	0	0	0	0	0	0	1	0	0	0	0	0	0	1	0	0	0	1	3	3	0	20
9	3486185	3486822	LINE/CR1	Plat_L3	DF05148667	0	0	0	0	0	0	0	0	0	0	0	1	0	0	0	0	0	0	1	1	0	0	0	3	3	0	20
1	186506409	186512975	LINE/L1	L1PA7	DF00352906	0	0	0	0	0	0	0	0	0	0	0	1	0	0	0	0	0	0	1	0	0	0	1	3	3	0	20
2	200055897	200061789	LINE/L1	L1PA15	DF02815906	0	0	0	0	0	0	0	0	0	0	0	1	0	0	0	0	0	0	1	0	1	0	0	3	3	0	20
15	65733653	65734621	LTR/ERVK	LTR5_Hs	DF01709443	0	0	0	0	0	0	0	0	0	0	0	1	0	0	0	0	0	0	0	1	0	0	1	3	3	0	20
X	74020976	74023236	LINE/L1	L1PA15	DF05732746	0	0	0	0	0	0	0	0	0	0	0	1	0	0	0	0	0	0	1	0	1	0	0	3	3	0	20
X	74018470	74020884	LINE/L1	L1PA15	DF05732744	0	0	0	0	0	0	0	0	0	0	0	1	0	0	0	0	0	0	1	0	1	0	0	3	3	0	20
12	98517881	98518165	SINE/Alu	AluSq10	DF01181650	0	0	0	0	0	0	0	0	0	0	1	0	1	0	0	0	0	0	0	0	1	0	0	3	3	0	20
14	60936234	60940365	LINE/L1	L1PA4	DF01519712	0	0	0	0	0	1	0	0	0	0	0	0	0	0	0	0	0	0	1	1	0	0	0	3	3	0	20
5	137757696	137759370	DNA/hAT-Charlie	Charlie3	DF04150601	0	0	0	0	0	0	0	0	0	0	0	0	0	0	0	0	0	0	1	0	1	0	1	3	3	0	20
X	129206478	129211272	LINE/L1	L1PB1	DF05826115	0	0	1	0	0	0	0	0	0	0	0	1	0	0	0	0	0	0	0	0	1	0	0	3	3	0	20
6	126190604	126193489	LINE/L1	L1MA4	DF04480522	0	0	1	0	0	0	0	0	0	0	0	1	0	0	0	0	0	0	0	0	1	0	0	3	3	0	20
X	103027455	103029468	LINE/L1	L1PA6	DF05777721	0	0	0	0	0	0	0	0	0	0	0	1	0	0	0	0	0	0	1	0	1	0	0	3	3	0	20
1	222555946	222556344	LTR/ERV1	LTR64	DF00457374	1	0	0	0	0	0	0	0	0	0	0	0	0	0	0	1	0	0	0	1	0	0	0	3	3	0	20
17	60761217	60767330	LINE/L1	L1PA6	DF02112150	0	0	0	0	0	0	0	0	0	0	0	1	0	0	0	0	0	0	1	0	1	0	0	3	3	0	20
14	60908323	60914469	LINE/L1	L1PA4	DF01519663	0	0	0	0	0	1	0	0	0	0	0	0	0	0	0	0	0	0	1	1	0	0	0	3	3	0	20
6	126424639	126426516	LTR/ERV1	MER110-int	DF04480891	0	0	0	0	0	0	0	0	0	0	0	1	0	0	0	0	0	0	1	0	1	0	0	3	3	0	20
8	26323856	26324427	LINE/L2	L2a	DF04915052	0	0	1	0	0	0	0	0	0	0	0	0	0	0	0	0	0	0	0	1	0	0	1	3	3	0	20
6	57133656	57133975	SINE/Alu	AluJb	DF04364581	0	0	0	0	0	0	0	0	0	0	0	1	0	0	0	0	0	0	1	0	1	0	0	3	3	0	20
5	143241815	143242804	LINE/L1	L1MC4	DF04163066	0	0	0	0	0	0	0	0	0	0	1	1	0	0	0	0	0	0	1	0	0	0	0	3	3	0	20
16	71426948	71427184	SINE/Alu	AluJr	DF01934393	0	0	0	0	0	0	0	0	0	0	0	1	0	0	0	0	0	0	1	0	1	0	0	3	3	0	20
7	26160428	26160843	LTR/ERVL	MLT2C1	DF04610409	0	0	0	0	0	0	0	0	0	0	0	1	0	0	0	0	0	0	0	1	0	0	1	3	3	0	20
12	103934331	103934468	SINE/MIR	MIR1_Amn	DF01193306	1	0	1	0	0	0	0	0	0	0	0	0	0	0	0	0	0	0	0	1	0	0	0	3	3	0	20
18	24145251	24146416	LINE/L1	L1MEg	DF02198274	0	0	0	0	0	0	0	0	0	0	0	1	0	0	0	0	0	0	1	0	1	0	0	3	3	0	20
6	108705218	108705984	LINE/L2	L2b	DF04449234	0	0	0	0	0	0	0	0	0	0	0	1	0	0	0	0	0	0	0	0	1	0	1	3	3	0	20
2	28423623	28424218	LINE/L2	L2c	DF02501124	0	0	1	0	0	0	0	0	0	0	0	1	0	0	0	0	0	0	0	0	0	0	1	3	3	0	20
9	120922207	120922521	DNA/hAT-Charlie	Charlie18a	DF05356506	0	0	0	0	0	0	0	0	0	0	0	0	0	0	1	0	0	0	0	1	0	0	1	3	3	0	20
14	67216359	67219530	LINE/L1	L1M2c	DF01532489	0	0	0	0	0	0	0	0	0	0	0	1	0	0	0	0	0	0	0	0	1	0	1	3	3	0	20
19	44904654	44904855	SINE/MIR	MIR	DF02406250	0	0	0	0	0	0	0	0	0	0	0	1	1	0	0	0	0	0	0	0	1	0	0	3	3	0	20
21	41387469	41388674	LINE/L2	L2b	DF03098060	0	0	0	1	0	0	0	0	0	0	0	0	0	0	0	1	0	0	0	1	0	0	0	3	3	0	20
7	132773233	132774656	LINE/L1	L1ME3B	DF04814079	0	0	0	0	0	0	0	0	0	0	0	1	1	0	0	0	0	0	0	0	1	0	0	3	3	0	20
5	115606342	115607179	LINE/L1	L1ME3B	DF04111119	0	0	0	0	0	0	0	0	0	0	0	1	0	0	0	0	0	0	0	1	0	0	1	3	3	0	20
10	70169946	70170157	SINE/MIR	MIRc	DF00605779	0	0	0	0	0	0	0	0	0	0	0	0	0	0	0	0	0	0	1	1	0	0	1	3	3	0	20
10	70169022	70169223	SINE/MIR	MIRc	DF00605778	0	0	0	0	0	0	0	0	0	0	0	0	0	0	0	0	0	0	1	1	0	0	1	3	3	0	20
10	70168325	70168614	SINE/Alu	AluSq2	DF00605776	0	0	0	0	0	1	0	0	0	0	0	0	0	0	0	0	0	0	1	1	0	0	0	3	3	0	20
10	70164747	70165018	DNA/TcMar-Tigger	Tigger1	DF00605771	0	0	0	0	0	0	0	0	0	0	0	0	0	0	0	0	0	0	1	1	0	0	1	3	3	0	20
9	32435340	32435485	DNA/hAT-Charlie	Charlie4z	DF05199561	0	0	0	0	0	0	0	0	0	0	0	1	0	0	0	0	0	0	0	1	0	0	1	3	3	0	20
7	96615599	96618294	LINE/L1	L1PB4	DF04743529	0	0	0	0	0	0	0	0	0	0	0	1	0	0	0	0	0	0	1	0	1	0	0	3	3	0	20
14	61092274	61098394	LINE/L1	L1PA5	DF01519962	0	0	0	0	0	1	0	0	0	0	0	1	0	0	0	0	0	0	1	0	0	0	0	3	3	0	20
8	26416501	26417442	LINE/L2	L2c	DF04915217	0	0	1	0	0	0	0	0	0	0	0	1	0	0	0	0	0	0	0	0	0	0	1	3	3	0	20
7	104991805	104992087	LINE/L1	L1MA4	DF04762807	0	0	0	0	0	0	0	0	0	0	0	0	0	0	0	0	0	0	1	1	0	0	1	3	3	0	20
10	94572262	94572952	LINE/L1	L1ME2	DF00657371	0	0	0	0	0	0	0	0	0	0	0	1	0	0	0	0	0	0	0	1	1	0	0	3	3	0	20
10	17725251	17725798	LINE/L1	L1MC4	DF00440149	0	0	1	0	0	0	0	0	0	0	0	1	0	0	0	0	0	0	0	0	0	0	1	3	3	0	20
4	776109	776418	LINE/L1	L1M5	DF03574200	1	0	1	0	0	0	0	0	0	0	0	0	0	0	0	0	0	0	0	1	0	0	0	3	3	0	20
2	162328534	162329299	LTR/ERV1	LTR1A2	DF02749547	0	0	0	0	0	0	0	0	0	0	0	0	0	0	0	0	0	0	1	1	0	0	1	3	3	0	20
2	162324786	162326516	LTR/ERV1	HUERS-P2-int	DF02749541	0	0	0	0	0	0	0	0	0	0	0	0	0	0	0	0	0	0	1	1	0	0	1	3	3	0	20
2	162324003	162324785	LTR/ERV1	LTR1A2	DF02749540	0	0	0	0	0	0	0	0	0	0	0	0	0	0	0	0	0	0	1	1	0	0	1	3	3	0	20
1	67383862	67385112	LTR/ERVL-MaLR	THE1C-int	DF00163198	0	0	0	0	0	0	0	0	0	0	0	1	0	0	0	0	0	0	0	0	1	0	1	3	3	0	20
12	19628337	19629345	LTR/ERV1	LTR78	DF01035706	0	0	0	0	0	0	0	0	0	0	0	1	0	0	0	0	0	0	1	0	0	0	1	3	3	0	20
10	123177912	123178928	LINE/L1	L1PA7	DF00716731	0	0	1	0	0	0	0	0	0	0	0	1	0	0	0	0	0	0	0	0	0	0	1	3	3	0	20
3	20427149	20433572	LINE/L1	L1PA7	DF03236428	0	0	0	0	0	0	0	0	0	0	0	0	0	0	0	0	0	0	1	1	0	0	1	3	3	0	20
13	49056318	49057613	LINE/L1	L1MEd	DF01329445	0	0	0	0	0	0	0	0	0	0	0	0	0	0	0	0	0	0	1	1	0	0	1	3	3	0	20
2	186019741	186023322	LINE/L1	L1MA7	DF02791287	0	0	0	0	0	0	0	0	0	0	0	0	0	0	0	0	0	0	1	0	1	0	1	3	3	0	20
X	77843843	77847577	LINE/L1	L1P1	DF05738236	1	0	1	0	0	0	0	0	0	0	0	0	0	0	0	0	0	0	0	1	0	0	0	3	3	0	20
17	21154328	21156324	LINE/L1	L1MC1	DF02028790	0	0	0	0	0	0	0	0	0	0	0	0	0	0	0	0	0	0	1	1	1	0	0	3	3	0	20
6	29946495	29946638	LINE/CR1	L3	DF04308248	0	0	0	0	0	0	0	0	0	0	0	1	0	0	0	0	0	0	0	1	0	0	1	3	3	0	20
12	11114657	11116412	LINE/L1	L1MA2	DF01019462	0	0	0	0	0	1	0	0	0	0	0	0	0	0	0	0	0	0	1	1	0	0	0	3	3	0	20
2	223754929	223755524	DNA/hAT-Charlie	Charlie17	DF02898877	0	0	1	0	1	0	0	0	0	0	0	0	0	0	0	0	0	0	0	0	0	0	1	3	3	0	20
21	9008500	9009363	LTR/ERVL-MaLR	MSTA-int	DF03042097	0	0	0	0	0	0	0	0	0	0	0	1	0	0	0	0	0	0	1	0	1	0	0	3	3	0	20
1	78019871	78020162	SINE/Alu	AluSx1	DF00182861	0	0	0	0	0	0	0	0	0	0	0	1	0	0	0	0	0	0	1	0	1	0	0	3	3	0	20
14	69786647	69787190	LTR/ERVL-MaLR	MLT1M	DF01538192	0	0	0	0	0	0	0	0	0	0	0	1	0	0	0	0	0	0	1	0	1	0	0	3	3	0	20
14	69789722	69791301	LINE/L1	L1ME3Cz	DF01538197	0	0	0	0	0	0	0	0	0	0	0	1	0	0	0	0	0	0	0	0	1	0	1	3	3	0	20
14	69788846	69789709	LINE/L1	L1MB7	DF01538196	0	0	0	0	0	0	0	0	0	0	0	1	0	0	0	0	0	0	1	0	1	0	0	3	3	0	20
17	51304947	51308282	LINE/L1	L1P2	DF02091123	0	0	0	0	0	0	0	0	0	0	0	1	1	0	0	0	0	0	0	0	1	0	0	3	3	0	20
6	57218879	57220851	LINE/L1	L1ME1	DF04364741	0	0	1	0	0	1	0	0	0	0	0	0	0	0	0	0	0	0	0	1	0	0	0	3	3	0	20
12	122525092	122525392	SINE/Alu	AluSq2	DF01244221	0	0	0	0	0	0	0	0	0	0	0	0	0	0	0	0	0	0	1	1	1	0	0	3	3	0	20
2	152651097	152651378	SINE/Alu	AluSz6	DF02733091	0	0	0	0	0	0	0	0	0	0	0	1	0	0	0	0	0	0	0	0	1	0	1	3	3	0	20
10	87912221	87914878	LINE/L1	L1MB3	DF00642848	0	0	0	0	0	1	0	0	0	0	0	0	0	0	0	0	0	0	1	1	0	0	0	3	3	0	20
21	34171915	34173449	LINE/L1	L1ME1	DF03083547	0	0	1	0	0	0	0	0	0	0	0	0	0	0	0	0	0	0	0	0	1	0	1	3	3	0	20
5	32794707	32799584	LINE/L1	L1PA7	DF03970159	0	0	0	0	0	0	0	0	0	0	0	1	0	0	0	0	0	0	1	0	1	0	0	3	3	0	20
1	44819669	44819825	SINE/Alu	AluSx3	DF00109728	0	0	0	0	0	0	0	1	0	0	0	0	0	0	0	0	0	0	0	1	0	0	1	3	3	0	20
8	42025508	42029566	LINE/L1	L1MA4A	DF04947902	0	0	1	0	0	0	0	0	0	0	0	0	0	0	1	0	0	0	0	1	0	0	0	3	3	0	20
9	106900254	106906415	LINE/L1	L1PB1	DF05323016	0	0	0	0	0	1	0	0	0	0	0	0	0	0	0	0	0	0	1	0	0	0	1	3	3	0	20
2	108429144	108434368	LINE/L1	L1PA7	DF02650650	0	0	0	0	0	0	0	0	0	0	0	1	0	0	0	0	0	0	1	0	0	0	1	3	3	0	20
7	149511987	149516202	LINE/L1	L1PB1	DF04847640	0	0	0	0	0	0	0	0	0	0	0	1	0	0	0	0	0	0	1	0	1	0	0	3	3	0	20
13	52715356	52721744	LINE/L1	L1PA7	DF01336903	0	0	0	0	0	0	0	0	0	0	0	1	0	0	0	0	0	0	1	0	0	0	1	3	3	0	20
4	168981663	168986078	LINE/L1	L1PA15	DF03876928	0	0	0	0	0	1	0	0	0	0	0	0	1	0	0	0	0	0	0	1	0	0	0	3	3	0	20
14	95153264	95153628	LINE/RTE-X	L4_C_Mam	DF01592438	0	0	0	0	0	0	0	0	0	0	0	0	0	0	0	0	0	0	1	1	0	0	1	3	3	0	20
14	95154343	95154873	LINE/L1	L1MB3	DF01592439	0	0	0	0	0	0	0	0	0	0	0	0	0	0	0	0	0	0	1	1	0	0	1	3	3	0	20
6	42893671	42894666	LTR/ERVK	LTR5B	DF04338153	0	0	0	0	0	0	0	0	0	0	0	1	0	0	0	0	0	0	1	0	1	0	0	3	3	0	20
6	42894669	42900374	LTR/ERVK	HERVK-int	DF04338154	0	0	0	0	0	0	0	0	0	0	0	1	0	0	0	0	0	0	1	0	1	0	0	3	3	0	20
21	32660024	32664303	LTR/ERV1	HERVE_a-int	DF03080211	0	0	0	0	0	0	0	0	0	0	0	1	0	0	0	0	0	0	0	1	0	0	1	3	3	0	20
2	230166828	230167096	LTR/ERVL-MaLR	MLT1H-int	DF02911694	0	0	0	1	0	0	0	0	0	0	0	0	1	0	0	1	0	0	0	0	0	0	0	3	3	0	20
3	132666924	132667112	DNA/hAT-Charlie	MER5A	DF03444780	1	0	0	0	0	1	0	0	0	0	0	0	0	0	0	0	0	0	0	1	0	0	0	3	3	0	20
9	99907662	99909282	LINE/L1	L1MC4a	DF05309390	0	0	0	0	0	0	0	0	0	0	0	1	0	0	0	0	0	0	0	1	1	0	0	3	3	0	20
7	112541662	112547772	LINE/L1	L1PA5	DF04776967	0	0	0	0	0	0	0	0	0	0	0	1	0	0	0	0	0	0	1	0	1	0	0	3	3	0	20
5	82271274	82272256	LTR/ERV1	Harlequin-int	DF04056134	0	0	0	0	0	0	0	0	0	0	0	1	1	0	0	0	0	0	1	0	0	0	0	3	3	0	20
19	57525573	57526089	LTR/ERV1	LTR6A	DF02441814	0	0	0	0	0	0	0	0	0	0	0	1	1	0	0	0	0	0	0	0	1	0	0	3	3	0	20
12	42062981	42069120	LINE/L1	L1PA4	DF01070934	0	0	0	0	0	0	0	0	0	0	0	1	0	0	0	0	0	0	1	0	1	0	0	3	3	0	20
3	172401792	172402425	LINE/L1	HAL1	DF03518447	0	0	1	0	0	0	0	0	0	0	0	1	0	0	0	0	0	0	0	0	0	0	1	3	3	0	20
3	172402573	172403348	LINE/L1	HAL1	DF03518449	0	0	1	0	0	0	0	0	0	0	0	1	0	0	0	0	0	0	0	1	0	0	0	3	3	0	20
7	139279581	139280445	LINE/L1	L1MEd	DF04827464	0	0	0	0	0	0	0	0	0	0	0	0	0	0	0	0	0	0	1	1	0	0	1	3	3	0	20
5	36864419	36865703	LINE/L1	L1MB8	DF03977936	0	0	0	0	0	0	0	0	0	0	0	1	0	0	0	0	0	0	0	0	1	0	1	3	3	0	20
12	48622675	48623384	LTR/ERV1	LTR12D	DF01083132	0	0	0	0	0	0	0	0	0	0	0	1	0	0	0	0	0	0	1	0	1	0	0	3	3	0	20
3	9381361	9381506	DNA/hAT-Charlie	MER5A1	DF03212222	0	0	0	0	0	0	0	0	0	0	0	1	0	0	0	0	0	0	0	1	1	0	0	3	3	0	20
2	6834486	6835647	LINE/L1	L1MEf	DF02456636	0	0	0	0	0	0	0	0	0	0	0	0	0	0	0	0	0	0	1	1	0	0	1	3	3	0	20
4	124611939	124618085	LINE/L1	L1PA4	DF03799599	0	0	1	0	0	0	0	0	0	0	0	1	0	0	0	0	0	0	0	0	0	0	1	3	3	0	20
12	10576935	10578029	LINE/L1	L1MC2	DF01018545	0	0	0	0	0	0	0	0	0	0	0	1	0	0	0	0	0	0	1	0	1	0	0	3	3	0	20
1	169383155	169384958	LINE/L2	L2c	DF00319531	0	0	1	0	0	0	0	0	0	0	0	1	0	0	0	0	0	0	0	0	1	0	0	3	3	0	20
22	36233601	36233813	SINE/MIR	MIR	DF03158494	0	0	0	0	0	0	0	0	0	0	0	0	0	0	0	1	0	0	0	1	0	0	1	3	3	0	20
19	24147531	24153701	LINE/L1	L1PA3	DF02364445	0	0	0	0	0	1	0	0	0	0	0	1	0	0	0	0	0	0	0	0	1	0	0	3	3	0	20
9	32515610	32515980	LINE/L2	L2c	DF05199720	0	0	0	0	0	0	0	0	0	0	0	0	0	0	0	0	0	0	0	1	1	0	1	3	3	0	20
1	100000744	100002612	LINE/L1	L1MA4A	DF00223629	0	0	0	0	0	0	0	0	0	0	0	0	0	0	0	0	0	0	1	1	1	0	0	3	3	0	20
4	102745351	102746690	LTR/ERVL	HERVL-int	DF03762256	0	0	0	0	0	1	0	0	0	0	0	1	0	0	0	0	0	0	1	0	0	0	0	3	3	0	20
3	131014621	131015179	LINE/CR1	Plat_L3	DF03441616	0	0	0	0	0	0	0	0	0	0	0	0	0	0	0	0	0	0	1	1	0	0	1	3	3	0	20
5	132474373	132474831	LTR/ERVL-MaLR	MLT1D	DF04140202	0	0	0	0	0	0	0	0	0	0	0	1	1	0	0	0	0	0	1	0	0	0	0	3	3	0	20
3	155834620	155835331	LINE/L1	L1MC4	DF03489172	0	0	0	0	0	0	0	0	0	0	0	0	0	0	0	0	0	0	1	1	0	0	1	3	3	0	20
2	127446541	127448845	LINE/L1	L1MCb	DF02687734	0	0	0	0	0	0	0	0	0	0	0	1	0	0	0	0	0	0	0	0	1	0	1	3	3	0	20
11	125755622	125761165	LINE/L1	L1PA10	DF00979544	0	0	0	0	0	0	0	0	0	0	0	1	0	0	0	0	0	0	1	0	1	0	0	3	3	0	20
5	88305755	88310429	LINE/L1	L1P2	DF04066093	0	0	0	0	0	0	0	0	0	0	0	1	0	0	0	0	0	0	1	0	1	0	0	3	3	0	20
7	6009669	6009974	SINE/Alu	AluSq2	DF04574472	0	0	0	0	0	0	0	0	0	0	0	1	0	0	0	0	0	0	1	0	1	0	0	3	3	0	20
19	44250028	44253907	LINE/L1	L1PA7	DF02404369	0	0	0	0	0	1	0	0	0	0	0	1	0	0	0	0	0	0	1	0	0	0	0	3	3	0	20
16	84079335	84080491	LINE/L1	L1MC4a	DF01962924	0	0	0	0	0	0	0	0	0	0	0	0	0	0	0	0	0	0	1	1	1	0	0	3	3	0	20
1	204389813	204390398	LINE/L2	L2d	DF00385692	0	0	0	0	0	0	0	0	0	0	0	1	0	0	0	0	0	0	1	0	1	0	0	3	3	0	20
17	43349677	43350249	LTR/ERVK	HERVK13-int	DF02071195	0	0	0	0	0	0	0	0	0	0	0	1	0	0	0	0	0	0	0	1	1	0	0	3	3	0	20
17	82495754	82495919	LTR/ERVL	LTR33	DF02159734	0	0	0	0	0	0	0	0	0	0	0	1	0	0	0	0	0	0	1	0	1	0	0	3	3	0	20
7	26162999	26163346	LINE/L1	L1PA5	DF04610419	0	0	0	0	0	0	0	0	0	0	0	1	0	0	0	0	0	0	0	1	0	0	1	3	3	0	20
8	89736822	89741421	LINE/L1	L1PB1	DF05028931	0	0	0	0	0	0	0	0	0	0	0	0	0	0	0	0	0	0	1	1	0	0	1	3	3	0	20
9	83705543	83706359	LINE/L1	L1ME2z	DF05263583	0	0	0	0	0	1	0	0	0	0	0	0	0	0	0	0	0	0	0	1	0	0	1	3	3	0	20
1	24845862	24846861	LINE/L1	L1MEg	DF00057356	0	0	1	0	0	0	0	0	0	0	0	1	0	0	0	0	0	0	0	0	0	0	1	3	3	0	20
1	27670586	27670981	LTR/ERVL	MER21B	DF00065463	0	0	0	1	0	0	0	0	0	0	0	0	1	0	0	1	0	0	0	0	0	0	0	3	3	0	20
8	58567606	58568778	DNA/TcMar-Tigger	Tigger3b	DF04973007	0	0	1	0	0	1	0	0	0	0	0	0	0	0	0	0	0	0	0	1	0	0	0	3	3	0	20
16	50778295	50778752	LINE/L2	L2b	DF01888378	0	0	0	0	0	0	0	0	0	0	0	1	0	0	0	0	0	0	0	1	0	0	1	3	3	0	20
10	68947422	68948082	LINE/L2	L2b	DF00602837	0	0	0	0	0	0	0	0	0	0	0	1	0	0	0	0	0	0	1	0	1	0	0	3	3	0	20
2	134913203	134914831	LINE/L1	L1MA1	DF02702087	0	0	0	0	0	0	0	0	0	0	0	1	0	0	0	0	0	0	0	0	1	0	1	3	3	0	20
3	160588141	160593555	LINE/L1	L1M1	DF03497959	0	0	0	0	0	0	0	0	0	0	0	1	0	0	0	0	0	0	0	0	1	0	1	3	3	0	20
20	50578739	50579101	LTR/ERVL-MaLR	MSTB	DF03007911	0	0	0	0	0	0	0	1	0	0	0	0	0	0	0	0	0	0	0	1	0	0	1	3	3	0	20
6	149415697	149417770	DNA/TcMar-Tigger	Tigger1	DF04522967	0	0	0	0	0	0	0	0	0	0	0	1	0	0	0	0	0	0	0	1	1	0	0	3	3	0	20
9	21050144	21051404	DNA/TcMar-Mariner	HSMAR1	DF05180527	0	0	0	0	0	0	0	0	0	0	0	0	1	0	0	0	0	0	1	0	1	0	0	3	3	0	20
11	77561612	77564668	LINE/L1	L1MA3	DF00883716	0	0	0	0	0	0	0	0	0	0	0	1	0	0	0	0	0	0	1	0	0	1	0	3	3	0	20
14	76240380	76242064	LINE/L1	L1PB2	DF01553168	0	0	0	0	0	0	0	0	0	0	0	1	0	0	0	0	0	0	1	0	1	0	0	3	3	0	20
14	21197550	21198249	LTR/ERV1	LTR8	DF01446748	0	0	0	0	0	0	0	0	0	0	0	1	1	0	0	0	0	0	0	0	0	0	1	3	3	0	20
10	89429953	89430166	SINE/MIR	MIRb	DF00645838	0	0	0	0	0	0	0	0	0	0	0	0	1	0	0	0	0	0	1	0	1	0	0	3	3	0	20
10	89427737	89428175	LINE/L2	L2a	DF00645834	0	0	0	0	0	0	0	0	0	0	0	0	1	0	0	0	0	0	1	0	1	0	0	3	3	0	20
10	89425203	89425466	LTR/Gypsy?	LTR85a	DF00645831	0	0	0	0	0	0	0	0	0	0	0	0	1	0	0	0	0	0	1	0	1	0	0	3	3	0	20
3	157145729	157146172	LINE/L1	L1MC5	DF03491665	0	0	0	0	0	0	0	0	0	0	0	1	0	0	0	0	0	0	1	0	0	0	1	3	3	0	20
1	244393581	244394239	LTR/ERVL	ERVL-B4-int	DF00502412	0	0	0	0	0	0	0	0	0	0	0	1	1	0	0	0	0	0	0	0	0	0	1	3	3	0	20
6	28939567	28939863	SINE/Alu	AluSp	DF04306464	0	0	0	0	0	0	0	0	0	0	0	0	1	0	0	0	0	0	1	0	1	0	0	3	3	0	20
4	88450013	88450859	LTR/ERV1	HERV4_I-int	DF03738129	0	0	0	0	0	0	0	0	0	0	0	1	0	0	0	0	0	0	1	0	0	0	1	3	3	0	20
15	44721965	44722408	LTR/ERV1	MER65C	DF01666332	0	0	0	0	0	0	0	0	0	0	0	1	1	0	0	0	0	0	0	0	0	0	1	3	3	0	20
7	17763447	17767244	LINE/L1	L1PB1	DF04594863	0	0	0	0	0	0	0	0	0	0	0	1	0	0	0	0	0	0	1	0	0	0	1	3	3	0	20
19	44182471	44183946	LTR/ERVL	ERVL-E-int	DF02404209	0	0	0	0	0	0	0	0	0	0	0	1	0	0	0	0	0	0	1	0	1	0	0	3	3	0	20
4	8359178	8360107	LTR/ERV1	MER41-int	DF03589785	0	0	0	0	0	1	1	0	0	0	0	0	0	0	0	0	0	0	0	1	0	0	0	3	3	0	20
11	85673309	85675758	DNA/TcMar-Tigger	Tigger1	DF00901339	0	0	0	0	0	0	0	0	0	0	0	1	0	0	0	0	0	0	0	1	1	0	0	3	3	0	20
7	139288106	139288665	LINE/L2	L2b	DF04827479	0	0	0	0	0	0	0	0	0	0	0	0	0	0	0	0	0	0	1	1	0	0	1	3	3	0	20
7	7727496	7727890	LTR/ERVL	MLT2A2	DF04578432	1	0	0	0	0	0	0	0	0	0	1	0	0	0	0	0	0	0	0	1	0	0	0	3	3	0	20
1	100095555	100096833	LINE/L1	L1ME1	DF00223828	0	0	0	0	0	0	0	0	0	0	0	1	0	0	0	0	0	0	0	1	1	0	0	3	3	0	20
13	99181494	99183483	LTR/ERV1	MER4-int	DF01416708	0	0	0	0	0	0	0	0	0	0	0	0	0	0	0	0	0	0	1	1	1	0	0	3	3	0	20
6	34850995	34852533	LINE/L1	L1M1	DF04319261	0	0	0	0	0	0	0	0	0	0	0	1	0	0	0	0	0	0	1	1	0	0	0	3	3	0	20
17	43232486	43232908	LTR/ERVK	LTR13	DF02070886	0	0	0	0	0	0	0	0	0	0	0	1	0	0	0	0	0	0	0	1	1	0	0	3	3	0	20
22	28505305	28508275	LINE/L1	L1PA11	DF03138023	0	0	1	0	0	0	0	0	0	0	0	0	0	0	0	0	0	0	1	0	0	0	1	3	3	0	20
14	56454501	56460553	LINE/L1	L1PA5	DF01511315	0	0	0	0	0	0	0	0	0	0	0	1	0	0	0	0	0	0	1	0	1	0	0	3	3	0	20
2	189686837	189688544	LINE/L1	L1MA3	DF02797412	0	0	0	0	0	0	0	0	0	0	0	1	0	0	0	0	0	0	1	0	0	0	1	3	3	0	20
X	44902688	44905016	LINE/L1	L1M4	DF05684764	0	0	0	0	0	0	0	0	0	0	0	0	0	0	0	0	0	0	1	1	0	0	1	3	3	0	20
8	23047376	23048151	LINE/L1	L1MA7	DF04908125	0	0	1	0	0	0	0	0	0	0	0	0	0	0	0	0	0	0	1	0	0	0	1	3	3	0	20
8	23044024	23044933	LINE/L1	L1MA7	DF04908121	0	0	1	0	0	0	0	0	0	0	0	0	0	0	0	0	0	0	1	0	0	0	1	3	3	0	20
8	23045250	23047137	LINE/L1	L1MA7	DF04908123	0	0	1	0	0	0	0	0	0	0	0	0	0	0	0	0	0	0	1	0	0	0	1	3	3	0	20
17	46128314	46129094	LINE/L2	L2a	DF02078515	0	0	1	0	0	0	0	0	0	0	0	0	0	0	0	0	0	0	1	1	0	0	0	3	3	0	20
6	111399269	111401191	LINE/L1	L1MD3	DF04455053	0	0	0	0	0	1	0	0	0	0	0	0	0	0	0	0	0	0	0	1	0	0	1	3	3	0	20
10	26982411	26985853	LTR/ERV1	PRIMA4-int	DF00528660	0	0	0	0	0	0	0	0	0	0	0	1	0	0	0	0	0	0	1	0	1	0	0	3	3	0	20
10	26989555	26991274	LTR/ERV1	PRIMA4-int	DF00528665	0	0	0	0	0	0	0	0	0	0	0	1	0	0	0	0	0	0	1	0	1	0	0	3	3	0	20
3	172393103	172393826	LINE/L1	L1M3	DF03518433	0	0	1	0	0	0	0	0	0	0	0	1	0	0	0	0	0	0	0	1	0	0	0	3	3	0	20
7	23529282	23529560	SINE/Alu	AluSz	DF04605159	0	0	0	0	0	0	0	0	0	0	0	0	0	0	0	0	0	0	0	1	1	0	1	3	3	0	20
6	26532917	26532990	tRNA	tRNA-Thr-ACY	DF04301118	0	0	0	0	0	1	0	0	0	0	0	0	1	0	0	0	0	0	0	0	1	0	0	3	3	0	20
9	127446349	127446602	SINE/Alu	AluJr	DF05372140	0	0	0	0	0	0	0	0	0	0	0	1	0	0	0	0	0	0	0	1	0	0	1	3	3	0	20
3	172048479	172049135	LINE/L1	L1MB4	DF03517898	0	0	1	0	0	1	0	0	0	0	0	0	0	0	0	0	0	0	0	1	0	0	0	3	3	0	20
14	69805464	69806754	LINE/L1	L1M8	DF01538231	0	0	0	0	0	0	0	0	0	0	0	1	0	0	0	0	0	0	1	0	1	0	0	3	3	0	20
2	111132043	111133305	LTR/ERV1	LTR49-int	DF02655850	0	0	0	0	0	0	0	0	0	0	0	1	0	0	1	0	0	0	0	0	0	0	1	3	3	0	20
7	104996086	104996412	DNA/TcMar-Tigger	Tigger4b	DF04762818	0	0	0	0	0	0	0	0	0	0	0	0	0	0	0	0	0	0	0	1	1	0	1	3	3	0	20
7	104993434	104993652	DNA/TcMar-Tigger	Tigger2b_Pri	DF04762812	0	0	0	0	0	0	0	0	0	0	0	0	0	0	0	0	0	0	1	1	1	0	0	3	3	0	20
3	57604952	57606783	LINE/L1	L1MEc	DF03311407	0	0	0	0	0	0	0	0	0	0	0	1	0	0	0	0	0	0	0	0	1	0	1	3	3	0	20
3	57606882	57612400	LINE/L1	L1PA5	DF03311409	0	0	0	0	0	0	0	0	0	0	0	1	0	0	0	0	0	0	1	0	1	0	0	3	3	0	20
15	65693144	65693517	LTR/ERVL-MaLR	MLT1J	DF01709359	0	0	0	0	0	0	0	0	0	0	0	1	0	0	0	0	0	0	0	1	0	0	1	3	3	0	20
15	101216177	101218277	LINE/L1	L1MC3	DF01785628	0	0	1	0	0	0	0	0	0	0	0	0	0	0	0	0	0	0	0	1	1	0	0	3	3	0	20
5	150964133	150970273	LINE/L1	L1PA5	DF04180092	0	0	0	0	0	0	0	0	0	0	0	1	0	0	0	0	0	0	1	0	0	0	1	3	3	0	20
5	62672801	62678950	LINE/L1	L1PA4	DF04017334	0	0	0	0	0	0	0	0	0	0	0	1	0	0	0	0	0	0	1	0	1	0	0	3	3	0	20
17	61632804	61636162	LINE/L1	L1MA4	DF02113885	0	0	0	0	0	0	0	0	0	0	0	1	0	0	0	0	0	0	1	0	1	0	0	3	3	0	20
17	61792247	61793039	LINE/L1	L1MC2	DF02114221	0	0	0	0	0	0	0	0	0	0	0	0	0	0	0	0	0	0	1	1	1	0	0	3	3	0	20
1	241450793	241455059	LTR/ERVL	ERVL-B4-int	DF00496204	0	0	0	0	0	0	0	0	0	0	0	1	0	0	0	0	0	0	1	0	1	0	0	3	3	0	20
1	78671941	78673808	LINE/L1	L1PBb	DF00184076	0	0	0	0	0	0	0	0	0	0	0	1	0	0	0	0	0	0	1	1	0	0	0	3	3	0	20
1	78665103	78665521	LTR/ERVL	MER21-int	DF00184070	0	0	0	0	0	0	0	0	0	0	0	0	1	0	0	0	0	0	1	1	0	0	0	3	3	0	20
1	78665522	78666049	DNA/hAT-Charlie	MER1A	DF00184071	0	0	0	0	0	0	0	0	0	0	0	0	1	0	0	0	0	0	1	1	0	0	0	3	3	0	20
4	48397498	48400368	LINE/L1	L1PA11	DF03669765	0	0	1	0	0	1	0	0	0	0	0	0	0	0	0	0	0	0	0	1	0	0	0	3	3	0	20
10	72989572	72993431	LINE/L1	L1PA6	DF00612605	0	0	1	0	0	0	0	0	0	0	0	1	0	0	0	0	0	0	0	0	1	0	0	3	3	0	20
5	32658875	32661254	LINE/L1	L1PA8	DF03969939	0	0	0	0	0	0	0	0	0	0	0	1	0	0	0	0	0	0	1	0	1	0	0	3	3	0	20
17	43359217	43359892	LTR/ERV1	PRIMA41-int	DF02071210	0	0	0	0	0	0	0	0	0	0	0	1	0	0	0	0	0	0	0	1	1	0	0	3	3	0	20
19	6538845	6539146	SINE/Alu	AluSx	DF02317178	0	0	0	0	0	0	0	0	0	0	0	1	0	0	0	0	0	0	0	0	1	0	1	3	3	0	20
10	73127623	73128995	LINE/L1	L1MA10	DF00612951	0	0	0	0	0	0	0	0	0	0	0	1	0	0	0	0	0	0	1	1	0	0	0	3	3	0	20
18	9976589	9982015	LINE/L1	L1PA6	DF02180805	0	0	0	0	0	0	0	0	0	0	0	1	0	0	0	0	0	0	1	0	1	0	0	3	3	0	20
2	201312695	201318736	LINE/L1	L1PB1	DF02818623	0	0	1	0	0	0	0	0	0	0	0	1	0	0	0	0	0	0	0	0	0	0	1	3	3	0	20
14	70560918	70562529	LTR/ERVL-MaLR	MSTA-int	DF01539737	0	0	0	0	0	0	0	0	0	0	0	1	0	0	0	0	0	0	1	0	1	0	0	3	3	0	20
X	136809523	136810171	LTR/ERV1	ERV24B_Prim-int	DF05841936	0	0	0	0	0	0	0	0	0	0	0	1	0	0	0	0	0	0	1	0	1	0	0	3	3	0	20
9	3463949	3464792	LINE/L1	L1ME1	DF05148619	0	0	0	0	0	0	0	0	0	0	0	1	0	0	0	0	0	0	1	1	0	0	0	3	3	0	20
5	179727147	179727869	LINE/L2	L2a	DF04244209	1	0	1	0	0	0	0	0	0	0	0	0	0	0	0	0	0	0	0	1	0	0	0	3	3	0	20
12	10481372	10487825	LINE/L1	L1PA7	DF01018405	0	0	0	0	0	0	0	0	0	0	0	1	0	0	0	0	0	0	1	0	1	0	0	3	3	0	20
2	53758878	53760176	LTR/ERV1	HERV17-int	DF02551717	0	0	0	0	0	0	0	0	0	0	0	0	0	0	0	0	0	0	1	1	1	0	0	3	3	0	20
6	24690839	24691119	LINE/L2	L2c	DF04297188	0	0	0	0	0	0	0	0	0	0	0	1	0	0	0	0	0	0	1	0	1	0	0	3	3	0	20
2	6870230	6873927	LTR/ERV1	MER101-int	DF02456692	0	0	0	0	0	0	0	0	0	0	0	0	0	0	0	0	0	0	1	1	0	0	1	3	3	0	20
11	59561431	59561738	SINE/Alu	AluSx	DF00841197	0	0	0	0	0	0	0	0	0	0	0	1	0	0	0	0	0	0	1	0	1	0	0	3	3	0	20
7	99744007	99747524	LINE/L1	L1PA5	DF04750684	0	0	0	0	0	0	0	0	0	0	0	1	0	0	0	0	0	0	1	0	1	0	0	3	3	0	20
11	114571858	114575597	LINE/L1	L1PB1	DF00955841	0	0	0	0	0	0	0	0	0	0	0	1	0	0	0	0	0	0	1	0	1	0	0	3	3	0	20
9	105785075	105791214	LINE/L1	L1PA5	DF05320772	0	0	0	0	0	0	0	0	0	0	0	1	0	0	0	0	0	0	1	0	0	0	1	3	3	0	20
14	34553987	34554645	LINE/L2	L2a	DF01470881	0	0	0	0	0	0	0	0	0	0	0	1	0	0	0	0	0	0	1	0	1	0	0	3	3	0	20
19	50136864	50137170	LINE/L1	L1MC4	DF02422330	0	0	0	0	0	0	0	0	0	0	0	0	1	0	0	0	0	0	1	0	1	0	0	3	3	0	20
6	24708983	24709231	DNA/hAT-Charlie	MER3	DF04297224	0	0	0	0	0	1	0	1	0	0	0	0	0	0	0	0	0	0	0	1	0	0	0	3	3	0	20
3	88097377	88100967	LINE/L1	L1PA5	DF03369539	0	0	1	0	0	0	0	0	0	0	0	0	0	0	0	0	0	0	1	1	0	0	0	3	3	0	20
9	19338990	19340705	LINE/L1	L1MC4	DF05177300	0	0	0	0	0	0	0	0	0	0	0	1	0	0	0	0	0	0	0	1	1	0	0	3	3	0	20
14	20480847	20481124	SINE/Alu	AluJb	DF01445220	0	0	0	0	0	0	0	0	0	0	0	1	1	0	0	0	0	0	0	0	1	0	0	3	3	0	20
17	67337185	67337816	LINE/L1	L1MC1	DF02127171	0	0	0	0	0	0	0	0	0	0	0	1	0	0	0	0	0	0	1	0	1	0	0	3	3	0	20
11	73502120	73505139	LINE/L1	L1PA8A	DF00873264	0	0	1	0	0	0	0	0	0	0	0	0	0	0	0	0	0	0	0	1	1	0	0	3	3	0	20
9	32449769	32449920	DNA/hAT-Charlie	MER5A1	DF05199577	0	0	0	0	0	0	0	0	0	0	0	0	0	0	0	0	0	0	0	1	1	0	1	3	3	0	20
9	100449320	100449715	LINE/L2	L2c	DF05310580	0	0	1	0	0	0	1	0	0	0	0	0	0	0	0	0	1	0	0	0	0	0	0	3	3	0	20
5	75564272	75566796	LINE/L1	L1PA10	DF04042479	0	0	0	0	0	1	0	0	0	0	0	0	0	0	0	0	0	0	1	1	0	0	0	3	3	0	20
2	101773455	101774618	LINE/L1	L1MA2	DF02638815	0	0	0	0	0	0	0	0	0	0	0	0	0	0	0	0	0	0	1	1	0	0	1	3	3	0	20
20	43481124	43482267	LTR/ERV1	MER57A-int	DF02987697	0	0	0	0	0	0	0	0	0	0	0	1	0	0	0	0	0	0	1	0	0	0	1	3	3	0	20
10	89017754	89019140	LTR/ERV1	LTR12E	DF00645002	0	0	0	0	0	0	0	0	0	0	0	1	0	0	0	0	0	0	1	0	0	0	1	3	3	0	20
10	89019954	89020609	LTR/ERV1	MER61F	DF00645004	0	0	0	0	0	0	0	0	0	0	0	1	0	0	0	0	0	0	1	0	0	0	1	3	3	0	20
3	31640463	31641881	LINE/L1	L1ME3B	DF03257112	0	0	0	0	0	0	0	0	0	0	0	1	0	0	0	0	0	0	0	1	0	0	1	3	3	0	20
3	146520659	146520909	DNA/hAT-Charlie	MER102a	DF03472065	0	0	1	0	0	1	0	0	0	0	0	0	0	0	0	1	0	0	0	0	0	0	0	3	3	0	20
3	146518078	146518456	LTR/ERVL-MaLR	MLT1I	DF03472061	0	0	1	0	0	1	0	0	0	0	0	0	0	0	0	1	0	0	0	0	0	0	0	3	3	0	20
9	33032712	33032986	LINE/L1	L1MC5	DF05200808	0	0	0	0	0	0	0	0	0	0	0	1	0	0	0	0	0	0	0	1	0	0	1	3	3	0	20
9	33032384	33032581	DNA/TcMar-Tigger	MER6B	DF05200807	0	0	0	0	0	0	0	0	0	0	0	1	0	0	0	0	0	0	0	1	1	0	0	3	3	0	20
9	33031431	33031730	SINE/Alu	AluSx3	DF05200806	0	0	0	0	0	0	0	0	0	0	0	1	0	0	0	0	0	0	0	1	0	0	1	3	3	0	20
7	105258528	105261038	LINE/L1	L1PA6	DF04763349	0	0	0	0	0	0	0	0	0	0	0	0	0	0	0	0	0	0	1	1	0	0	1	3	3	0	20
1	121574291	121580420	LINE/L1	L1PA3	DF00264574	0	0	1	0	0	0	1	0	0	0	0	0	0	0	0	0	0	0	0	1	0	0	0	3	3	0	20
9	83553482	83556150	LINE/L1	L1PA14	DF05263233	0	0	0	0	0	0	0	0	0	0	0	1	0	0	0	0	0	0	1	1	0	0	0	3	3	0	20
9	83550725	83553474	LINE/L1	L1PA14	DF05263232	0	0	0	0	0	0	0	0	0	0	0	1	0	0	0	0	0	0	1	1	0	0	0	3	3	0	20
3	158911959	158913535	LTR/ERV1	MER66-int	DF03494739	0	0	0	0	0	0	0	0	0	0	0	1	0	0	0	0	0	0	1	0	0	0	1	3	3	0	20
2	162329684	162330365	LINE/L1	L1PA13	DF02749550	0	0	0	0	0	0	0	0	0	0	0	0	0	0	0	0	0	0	1	1	0	0	1	3	3	0	20
7	67303089	67303389	SINE/Alu	AluSx1	DF04683181	0	0	0	0	0	0	0	0	0	0	0	0	1	0	0	0	0	0	1	0	1	0	0	3	3	0	20
X	41203998	41204570	LINE/L1	L1MB8	DF05676545	0	0	0	0	0	0	0	0	0	0	0	1	0	0	0	0	0	0	0	1	0	0	1	3	3	0	20
11	87166106	87171004	LINE/L1	L1PA7	DF00904644	0	0	0	0	0	1	0	0	0	0	0	0	0	0	0	0	0	0	1	1	0	0	0	3	3	0	20
1	197076995	197079657	DNA/TcMar-Tigger	Tigger2	DF00370636	0	0	0	0	0	0	0	0	0	0	0	1	1	0	0	0	0	0	1	0	0	0	0	3	3	0	20
5	72916991	72917900	LINE/L2	L2a	DF04037283	0	0	0	0	0	0	0	0	0	0	0	1	1	0	0	0	0	0	0	0	1	0	0	3	3	0	20
12	121038103	121038463	LINE/L1	L1MC5a	DF01239739	0	0	0	0	0	0	0	0	0	0	0	0	0	0	0	0	0	0	1	1	0	0	1	3	3	0	20
17	43363465	43363776	LTR/ERVL	LTR52	DF02071217	0	0	0	0	0	0	0	0	0	0	0	1	0	0	0	0	0	0	0	1	1	0	0	3	3	0	20
7	105008507	105008787	SINE/Alu	AluSx1	DF04762844	0	0	0	0	0	0	0	0	0	0	0	0	0	0	0	0	0	0	1	1	1	0	0	3	3	0	20
7	105006926	105007167	SINE/Alu	AluSz	DF04762840	0	0	0	0	0	0	0	0	0	0	0	0	0	0	0	0	0	0	0	1	1	0	1	3	3	0	20
9	5074835	5076678	DNA/TcMar-Tigger	Tigger1	DF05151803	0	0	0	0	0	0	0	0	0	0	0	0	0	0	0	0	0	0	1	1	0	0	1	3	3	0	20
15	44740548	44744468	LINE/L1	L1PA3	DF01666390	0	0	0	0	0	0	0	0	0	0	0	1	0	0	0	0	0	0	0	1	0	0	1	3	3	0	20
5	75560524	75563125	LINE/L1	L1PA7	DF04042474	0	0	0	0	0	1	0	0	0	0	0	0	0	0	0	0	0	0	1	1	0	0	0	3	3	0	20
3	9361510	9362162	LTR/ERV1	MER72	DF03212169	0	0	0	0	0	0	0	0	0	0	0	1	1	0	0	0	0	0	0	0	1	0	0	3	3	0	20
19	19304131	19304580	LINE/L1	L1MC5	DF02354847	1	0	0	0	0	0	0	0	0	0	0	0	0	0	0	0	0	0	0	1	1	0	0	3	3	0	20
14	24169206	24169830	LINE/L2	L2a	DF01452640	0	0	0	0	0	0	0	0	0	0	0	1	0	0	0	1	0	0	0	0	1	0	0	3	3	0	20
12	22657374	22657870	LTR/ERVL-MaLR	MLT1K	DF01040863	0	0	0	0	0	0	0	0	0	0	0	0	0	0	0	0	0	0	1	1	1	0	0	3	3	0	20
21	25449526	25451125	LTR/ERVL-MaLR	THE1D-int	DF03066019	0	0	0	0	0	0	0	-1	0	0	0	0	0	0	0	0	0	0	1	0	1	0	1	4	3	1	19
3	37046009	37046566	LINE/L1	L1M5	DF03268302	1	0	0	0	-1	0	0	0	0	0	0	0	0	0	0	0	0	0	0	1	0	0	1	4	3	1	19
17	35368278	35369590	LINE/L1	L1MA1	DF02052078	0	0	0	0	-1	1	0	1	0	0	0	0	0	0	0	0	0	0	0	1	0	0	0	4	3	1	19
1	173862553	173862837	SINE/Alu	AluSx	DF00327783	0	0	0	0	0	0	0	0	0	0	0	1	1	0	1	0	0	0	0	-1	0	0	0	4	3	1	19
8	140646158	140646458	SINE/Alu	AluY	DF05134078	0	0	0	0	0	-1	0	0	0	0	1	1	1	0	0	0	0	0	0	0	0	0	0	4	3	1	19
10	58826782	58828218	DNA/TcMar-Tigger	Tigger2	DF00582826	0	0	0	0	0	1	1	0	0	0	0	1	0	0	0	0	0	0	-1	0	0	0	0	4	3	1	19
6	63585264	63587739	LINE/L1	L1PA10	DF04372023	0	0	0	0	0	0	0	0	0	0	0	1	0	0	0	0	0	0	1	-1	1	0	0	4	3	1	19
8	103393053	103393860	LTR/ERVL	LTR41B	DF05057113	0	0	0	0	0	0	0	0	0	0	0	1	1	0	0	0	0	0	0	-1	0	0	1	4	3	1	19
1	93292180	93294874	LINE/L1	L1MA3	DF00211127	0	0	-1	0	0	0	0	0	0	0	0	1	0	0	0	0	0	0	1	0	1	0	0	4	3	1	19
2	70218739	70219305	LINE/L2	L2a	DF02584483	1	0	0	0	-1	1	0	0	0	0	0	0	0	0	0	0	0	0	0	1	0	0	0	4	3	1	19
5	43297448	43297558	SINE/MIR	MIRb	DF03990174	0	0	1	0	0	0	-1	0	0	1	0	0	0	0	0	1	0	0	0	0	0	0	0	4	3	1	19
9	21922592	21929264	LTR/ERV1	MER50-int	DF05181921	0	0	1	0	0	1	0	0	0	0	0	0	0	0	0	0	0	0	0	-1	1	0	0	4	3	1	19
21	46587857	46591236	LINE/L1	L1PB1	DF03106966	0	0	1	0	0	-1	0	0	0	0	0	0	0	0	0	0	0	0	0	0	1	1	0	4	3	1	19
2	135072211	135074671	LTR/ERV1	MER83B-int	DF02702447	0	0	1	0	0	0	0	0	0	-1	0	0	0	0	0	0	0	0	1	1	0	0	0	4	3	1	19
11	6579552	6581749	LINE/L1	L1MA3	DF00744803	0	0	0	0	0	0	0	0	0	0	0	1	0	0	0	0	0	0	1	-1	1	0	0	4	3	1	19
5	181218548	181218850	SINE/Alu	AluY	DF04247527	0	0	0	0	0	-1	0	0	0	0	0	1	0	0	0	0	0	0	1	0	1	0	0	4	3	1	19
18	59953404	59953712	SINE/Alu	AluSq2	DF02265777	0	0	0	0	0	0	0	0	0	0	-1	1	1	0	0	0	0	0	0	0	1	0	0	4	3	1	19
X	103685659	103686122	LINE/L1	L1MC5	DF05779170	1	0	1	0	0	0	1	0	0	0	0	0	0	0	0	0	0	0	0	0	-1	0	0	4	3	1	19
6	27790570	27791285	DNA/hAT-Charlie	Charlie2b	DF04304035	0	0	1	0	0	-1	0	0	0	0	0	0	0	0	0	0	0	0	0	1	1	0	0	4	3	1	19
11	62841037	62841339	SINE/Alu	AluSc	DF00848730	0	0	0	0	0	-1	0	1	0	0	0	1	0	0	0	0	0	0	0	0	1	0	0	4	3	1	19
13	110897136	110897412	SINE/Alu	AluJr	DF01437153	0	0	0	0	-1	1	0	1	0	0	0	0	0	0	0	0	0	0	0	1	0	0	0	4	3	1	19
1	154677855	154679190	LTR/ERV1	LTR12E	DF00289616	0	0	0	0	0	0	-1	1	0	0	0	0	0	0	0	1	0	0	0	0	1	0	0	4	3	1	19
11	64179304	64179825	LTR/ERVL-MaLR	MLT1H1	DF00851605	0	0	0	0	0	0	0	0	0	0	0	1	0	0	0	0	0	0	0	-1	1	0	1	4	3	1	19
8	97729227	97729515	LTR/ERVL-MaLR	MLT1J	DF05044483	1	0	0	0	1	0	0	0	0	0	0	0	0	0	0	0	0	0	1	0	-1	0	0	4	3	1	19
8	97728910	97729226	SINE/Alu	AluJr	DF05044482	1	0	0	0	1	0	0	0	0	0	0	0	0	0	0	-1	0	0	1	0	0	0	0	4	3	1	19
13	51376482	51377861	LINE/L1	L1ME1	DF01334244	0	0	0	0	0	0	0	0	0	-1	0	1	0	0	0	0	0	0	0	1	0	0	1	4	3	1	19
19	6586929	6587548	Low_complexity	GA-rich	DF02317355	0	0	0	0	1	0	0	0	0	0	0	0	0	0	-1	0	0	0	0	1	0	0	1	4	3	1	19
6	2310864	2316711	LTR/ERV1	Harlequin-int	DF04251884	0	0	1	0	0	1	0	0	0	0	0	-1	0	0	0	0	0	0	0	1	0	0	0	4	3	1	19
11	122145809	122146232	LTR/ERVL-MaLR	MLT1H	DF00972045	0	0	1	0	0	1	0	0	0	0	0	-1	0	0	0	0	0	0	1	0	0	0	0	4	3	1	19
4	17868887	17869993	LINE/L2	L2c	DF03609789	0	0	1	0	0	0	0	0	0	0	0	1	0	0	0	0	0	0	0	-1	1	0	0	4	3	1	19
5	53012493	53018644	LINE/L1	L1PA13	DF03998862	0	0	0	0	0	1	0	0	0	-1	0	0	1	0	0	0	0	0	1	0	0	0	0	4	3	1	19
7	139370458	139370752	SINE/Alu	AluSx	DF04827686	0	0	-1	0	0	0	0	0	0	0	0	0	0	0	0	0	0	0	1	1	0	0	1	4	3	1	19
2	190943193	190943568	LINE/L2	L2b	DF02799915	0	0	-1	0	0	0	0	0	0	0	0	1	0	0	0	0	0	0	0	0	1	0	1	4	3	1	19
7	111296366	111298070	LINE/L1	L1MD2	DF04774611	0	0	0	0	0	0	0	0	0	-1	0	0	0	0	0	0	0	0	1	1	0	0	1	4	3	1	19
21	8999920	9002239	LINE/L1	L1PA4	DF03042088	0	0	0	0	0	0	0	0	0	0	-1	1	0	0	0	0	0	0	1	0	1	0	0	4	3	1	19
10	99708400	99708546	SINE/MIR	MIR3	DF00668552	1	0	0	0	0	-1	0	0	0	0	0	0	0	0	0	0	0	0	1	1	0	0	0	4	3	1	19
1	41172207	41174229	LINE/L1	L1MA5	DF00101111	0	0	1	0	0	1	0	0	0	0	0	-1	0	0	0	0	0	0	0	1	0	0	0	4	3	1	19
6	57179837	57181407	LINE/L1	L1MEd	DF04364663	0	0	1	0	0	1	0	0	0	0	0	0	0	0	0	0	0	0	0	-1	0	0	1	4	3	1	19
19	27747412	27749130	LTR/ERVK	HERVK22-int	DF02364768	0	0	1	0	0	-1	0	0	0	0	0	0	0	0	0	1	0	0	0	1	0	0	0	4	3	1	19
2	46602848	46605002	LINE/L1	L1MA3	DF02538105	0	0	0	0	-1	0	0	0	0	0	0	1	0	0	0	1	0	0	0	0	0	0	1	4	3	1	19
3	45014516	45016740	LTR/ERVL	ERVL-E-int	DF03284475	0	0	0	0	0	0	0	0	0	0	0	0	1	0	0	0	0	0	0	-1	1	0	1	4	3	1	19
3	134201365	134201778	LINE/L2	L2c	DF03447736	1	0	0	0	-1	1	0	0	0	0	0	0	0	0	0	0	0	0	0	1	0	0	0	4	3	1	19
1	173650109	173656242	LINE/L1	L1PA6	DF00327316	0	0	-1	0	0	0	0	0	0	0	0	1	0	0	0	0	0	0	1	0	1	0	0	4	3	1	19
1	193094401	193094824	LTR/ERVL	LTR83	DF00363994	1	0	1	0	0	0	1	0	0	0	0	0	0	0	0	0	0	0	0	-1	0	0	0	4	3	1	19
9	92253902	92254117	DNA/hAT-Charlie	MER20	DF05292594	1	0	1	0	0	0	0	0	0	0	0	0	0	0	0	0	0	0	-1	0	0	0	1	4	3	1	19
3	88151128	88152122	LINE/L1	L1ME3E	DF03369630	0	0	0	0	-1	0	0	0	0	0	0	1	0	0	0	0	0	0	0	1	0	0	1	4	3	1	19
5	66087103	66088867	LINE/L1	L1MEc	DF04023440	0	0	0	0	0	1	0	0	0	0	0	1	0	0	0	0	0	0	0	-1	0	0	1	4	3	1	19
11	122128420	122129463	LINE/CR1	L3	DF00972018	0	0	1	0	0	1	0	0	0	0	0	-1	0	0	0	0	0	0	1	0	0	0	0	4	3	1	19
6	111478894	111479202	DNA/TcMar-Tigger	Tigger19b	DF04455205	0	0	-1	0	0	1	0	0	0	0	0	0	0	0	0	0	0	0	0	1	0	0	1	4	3	1	19
3	126460126	126460403	DNA/hAT-Charlie	Charlie17	DF03431696	1	0	1	0	-1	0	0	1	0	0	0	0	0	0	0	0	0	0	0	0	0	0	0	4	3	1	19
3	19987775	19988838	LTR/ERVK	MER11B	DF03235483	0	0	1	0	-1	0	0	0	0	0	0	0	0	0	0	0	0	0	1	0	1	0	0	4	3	1	19
10	111023803	111025712	LINE/L1	L1MC1	DF00692115	0	0	1	0	0	0	0	0	0	0	0	1	0	0	0	0	0	0	0	-1	1	0	0	4	3	1	19
14	22930733	22930999	SINE/Alu	AluSq	DF01450185	0	0	0	0	0	-1	0	0	0	0	0	1	0	0	0	0	0	0	1	0	1	0	0	4	3	1	19
8	118021665	118022041	LINE/CR1	X7A_LINE	DF05083090	0	0	0	0	0	1	0	0	0	-1	0	0	0	0	0	0	0	0	0	1	0	0	1	4	3	1	19
13	27213119	27219578	LTR/ERV1	HERV9NC-int	DF01286454	0	0	0	0	0	-1	0	0	0	0	0	0	0	0	0	0	0	0	1	0	1	0	1	4	3	1	19
7	134940597	134940774	RNA	7SK	DF04818358	1	0	0	0	0	1	1	0	0	0	0	-1	0	0	0	0	0	0	0	0	0	0	0	4	3	1	19
5	112177570	112181169	LINE/L1	L1ME2	DF04105072	0	0	-1	0	0	0	0	0	0	0	0	1	1	0	0	0	0	0	0	0	1	0	0	4	3	1	19
6	27594431	27594742	SINE/Alu	AluSx3	DF04303495	0	0	0	0	0	-1	0	0	0	0	0	0	1	0	0	0	0	0	1	0	1	0	0	4	3	1	19
20	25697694	25700739	LINE/L1	L1MA4	DF02951037	0	0	0	0	0	-1	0	0	0	0	0	1	0	0	0	0	0	0	1	1	0	0	0	4	3	1	19
20	25700716	25707161	LINE/L1	L1PA7	DF02951038	0	0	0	0	0	-1	0	0	0	0	0	1	0	0	0	0	0	0	1	1	0	0	0	4	3	1	19
2	39052316	39052870	LINE/L1	L1ME1	DF02522700	0	0	1	0	-1	0	0	0	0	0	0	0	0	0	0	0	0	0	0	1	1	0	0	4	3	1	19
7	22952050	22952616	LINE/L2	L2a	DF04603886	0	0	1	0	0	0	0	0	0	0	0	1	0	0	0	0	0	0	1	-1	0	0	0	4	3	1	19
1	219185525	219186040	LTR/ERVL-MaLR	MLT1G3	DF00450902	0	0	-1	0	0	1	0	0	0	0	0	0	0	0	0	0	0	0	1	1	0	0	0	4	3	1	19
1	219186094	219187224	LINE/L1	L1MEf	DF00450903	0	0	-1	0	0	1	0	0	0	0	0	0	0	0	0	0	0	0	1	1	0	0	0	4	3	1	19
10	31348814	31350252	LINE/L1	L1MA8	DF00538287	0	0	1	0	0	1	0	0	0	0	0	-1	0	0	0	0	0	0	0	1	0	0	0	4	3	1	19
6	117645309	117651682	LINE/L1	L1PA7	DF04465981	0	0	0	0	0	0	0	0	0	0	0	1	0	0	0	0	0	0	0	-1	1	0	1	4	3	1	19
2	88581792	88582633	LTR/ERVL	ERVL-B4-int	DF02620664	0	0	1	0	-1	0	0	0	0	0	0	0	0	0	0	0	0	0	0	1	0	0	1	4	3	1	19
12	56686374	56686676	SINE/Alu	AluSp	DF01101455	-1	0	0	0	1	0	0	0	0	0	1	0	0	0	0	0	0	0	0	0	0	1	0	4	3	1	19
6	27237570	27237644	tRNA	tRNA-Ile-ATT	DF04302633	0	0	0	0	0	-1	0	0	0	0	0	1	0	0	0	0	0	0	1	0	1	0	0	4	3	1	19
7	134092947	134096233	LINE/L1	L1M4	DF04816654	0	0	0	0	0	-1	0	0	0	0	0	1	0	0	0	0	0	0	0	0	1	0	1	4	3	1	19
19	49452716	49453021	SINE/Alu	AluSx	DF02420300	0	0	0	0	0	-1	0	0	0	0	0	0	1	0	0	0	0	0	1	0	1	0	0	4	3	1	19
7	24735825	24739812	LINE/L1	L1MA3	DF04607561	0	0	1	0	0	1	0	0	0	0	-1	0	0	0	0	0	0	0	0	0	1	0	0	4	3	1	19
X	76193422	76194552	LINE/L1	L1MA1	DF05735919	0	0	1	0	0	-1	0	0	0	0	0	0	0	0	0	0	0	0	1	0	0	0	1	4	3	1	19
13	111247976	111249303	LINE/L1	L1MEf	DF01437728	0	0	1	0	0	1	0	0	0	0	0	1	0	0	0	0	0	0	0	-1	0	0	0	4	3	1	19
21	34111331	34111647	LINE/CR1	L3	DF03083437	0	0	1	0	0	0	0	0	0	0	0	0	0	0	0	0	0	0	0	-1	1	0	1	4	3	1	19
20	35071285	35077393	LINE/L1	L1PA5	DF02966230	0	0	1	0	0	1	0	0	0	0	0	-1	0	0	0	0	0	0	0	1	0	0	0	4	3	1	19
8	118018109	118018589	LTR/ERVL-MaLR	MLT1C	DF05083083	0	0	0	0	0	1	0	0	0	-1	0	0	0	0	0	0	0	0	0	1	0	0	1	4	3	1	19
5	43291600	43291810	SINE/MIR	MIRb	DF03990167	0	0	1	0	0	0	-1	0	0	1	0	0	0	0	0	1	0	0	0	0	0	0	0	4	3	1	19
5	43291988	43292290	SINE/Alu	AluSc5	DF03990168	-1	0	1	0	0	0	0	0	0	1	1	0	0	0	0	0	0	0	0	0	0	0	0	4	3	1	19
3	98858825	98864864	LINE/L1	L1PA5	DF03381386	0	0	1	0	0	1	0	0	0	-1	0	0	0	0	0	0	0	0	0	1	0	0	0	4	3	1	19
6	26322416	26322639	SINE/Alu	AluY	DF04300621	0	0	0	0	0	-1	0	0	0	0	0	1	0	0	0	0	0	0	1	0	1	0	0	4	3	1	19
1	149558418	149558493	tRNA	tRNA-Asn-AAC	DF00277797	0	0	0	0	0	-1	0	0	0	0	0	0	1	0	0	0	0	0	1	0	1	0	0	4	3	1	19
10	460597	464769	LINE/L1	L1PA10	DF00406469	0	0	0	0	0	1	0	0	0	0	0	0	0	0	1	0	0	0	1	-1	0	0	0	4	3	1	19
9	93440752	93441491	LINE/L1	L1MEf	DF05294980	0	0	0	0	-1	0	0	0	0	0	0	0	1	0	0	0	0	0	1	0	1	0	0	4	3	1	19
9	105751082	105755276	LINE/L1	L1PA10	DF05320733	0	0	0	0	-1	0	0	0	0	0	0	1	0	0	0	0	0	0	0	1	0	0	1	4	3	1	19
13	32458365	32461604	LINE/L1	L1MA4A	DF01297191	0	0	0	0	0	0	0	0	0	-1	0	1	0	0	0	0	0	0	0	1	0	0	1	4	3	1	19
9	132317784	132319063	LINE/L1	L1MEh	DF05384976	0	0	1	0	0	-1	0	0	0	0	0	1	0	0	0	0	0	0	0	1	0	0	0	4	3	1	19
9	132319065	132319738	LINE/L2	L2a	DF05384977	0	0	1	0	0	-1	0	0	0	0	0	1	0	0	0	0	0	0	0	1	0	0	0	4	3	1	19
3	122724650	122725431	Retroposon/SVA	SVA_A	DF03423886	0	0	0	1	-1	0	0	0	0	0	0	0	0	0	0	1	0	0	0	1	0	0	0	4	3	1	19
16	47293021	47295891	LINE/L1	L1ME3G	DF01880586	0	0	0	0	0	1	0	0	0	0	0	0	0	0	0	0	0	0	1	-1	1	0	0	4	3	1	19
7	111329183	111331706	LINE/L1	L1MA7	DF04774669	0	0	0	0	0	0	0	0	0	-1	0	0	0	0	0	0	0	0	1	1	0	0	1	4	3	1	19
2	101723786	101724259	LINE/CR1	L3	DF02638723	0	0	0	0	0	0	0	0	0	-1	0	0	0	0	0	0	0	0	1	1	0	0	1	4	3	1	19
10	27127380	27127868	LINE/L1	L1ME3A	DF00528943	1	0	0	0	-1	0	0	0	0	0	0	0	0	0	0	0	0	0	0	1	0	0	1	4	3	1	19
9	33048848	33049648	LINE/L1	L1MC1	DF05200844	0	0	0	0	-1	0	0	0	0	0	0	1	0	0	0	0	0	0	0	0	1	0	1	4	3	1	19
1	241424986	241431394	LINE/L1	L1PA7	DF00496173	0	0	-1	0	0	1	0	0	0	0	0	0	0	0	0	0	0	0	1	0	1	0	0	4	3	1	19
16	31278740	31284853	LINE/L1	L1PA5	DF01871588	0	0	0	0	0	0	0	0	0	0	0	1	0	0	0	0	0	0	1	0	1	0	-1	4	3	1	19
5	10717681	10720094	LTR/ERVL	HERVL-int	DF03931040	0	0	0	0	0	1	0	0	0	0	0	-1	0	0	0	0	0	0	1	1	0	0	0	4	3	1	19
17	75204851	75205149	SINE/Alu	AluSx3	DF02144581	0	0	0	0	0	-1	0	0	0	0	0	0	1	0	0	0	0	0	1	0	1	0	0	4	3	1	19
6	87183440	87185385	DNA/MULE-MuDR	Ricksha_c	DF04411141	0	0	1	0	0	1	0	0	0	0	0	0	0	0	0	0	0	0	0	1	-1	0	0	4	3	1	19
6	159769530	159770526	LINE/L1	L1MEc	DF04543775	-1	0	1	0	0	0	0	0	0	1	0	1	0	0	0	0	0	0	0	0	0	0	0	4	3	1	19
17	5185524	5187093	LTR/ERVL-MaLR	THE1A-int	DF01990940	0	0	0	0	0	0	0	0	0	0	0	-1	0	0	0	0	0	0	1	0	1	0	1	4	3	1	19
9	92072133	92078232	LTR/ERV1	HERVH-int	DF05292242	0	0	0	0	-1	0	1	0	0	0	0	0	0	0	0	0	0	0	1	1	0	0	0	4	3	1	19
8	30071464	30072465	LINE/L1	L1MB8	DF04923387	1	0	1	0	-1	0	0	1	0	0	0	0	0	0	0	0	0	0	0	0	0	0	0	4	3	1	19
13	43056899	43059152	LINE/L1	L1PB1	DF01317241	0	0	-1	0	0	0	0	0	0	0	0	0	0	0	0	1	0	0	0	1	0	0	1	4	3	1	19
6	99447522	99453184	LINE/L1	L1PA5	DF04432213	0	0	0	0	0	1	0	0	0	0	0	0	0	0	0	0	0	0	1	-1	1	0	0	4	3	1	19
15	65666082	65666601	DNA/TcMar-Tigger	MER44B	DF01709302	0	0	0	0	-1	0	0	0	0	0	0	1	0	0	0	0	0	0	0	1	0	0	1	4	3	1	19
6	90562109	90568221	LINE/L1	L1PA5	DF04418036	0	0	0	0	0	1	0	0	0	0	0	-1	0	0	0	0	0	0	1	1	0	0	0	4	3	1	19
4	82840553	82841136	DNA/TcMar-Tigger	Tigger3	DF03726846	1	0	1	0	0	0	0	0	0	-1	0	0	0	0	0	0	0	0	0	1	0	0	0	4	3	1	19
11	66247050	66247803	LINE/L2	L2a	DF00856724	1	0	1	0	0	0	1	0	0	0	0	0	0	0	0	0	0	0	0	0	0	-1	0	4	3	1	19
2	190961212	190961478	SINE/Alu	AluSx	DF02799936	0	0	-1	0	1	0	0	0	0	0	0	1	0	0	0	0	0	0	0	0	0	0	1	4	3	1	19
15	56951948	56954264	LINE/L1	L1ME1	DF01690200	0	0	0	0	0	1	0	0	0	-1	0	0	0	0	0	0	0	0	1	1	0	0	0	4	3	1	19
8	51863978	51866931	LINE/L1	L1MA7	DF04960530	0	0	0	0	0	1	0	0	0	-1	0	0	0	0	0	0	0	0	0	1	0	0	1	4	3	1	19
6	111414006	111414624	LINE/L2	L2a	DF04455084	0	0	-1	0	0	1	0	0	0	0	0	0	0	0	0	0	0	0	0	1	0	0	1	4	3	1	19
10	31336256	31337445	LINE/L1	L1ME3E	DF00538270	0	0	1	0	0	1	0	0	0	0	0	-1	0	0	0	0	0	0	0	1	0	0	0	4	3	1	19
4	54034419	54036280	LINE/L1	L1ME3G	DF03675974	0	0	0	0	0	1	0	0	0	-1	0	0	1	0	0	0	0	0	0	1	0	0	0	4	3	1	19
7	154950438	154951131	LINE/L1	L1MC1	DF04858476	0	0	0	0	-1	1	0	0	0	0	0	0	0	0	0	1	0	0	0	1	0	0	0	4	3	1	19
17	8358777	8359298	LINE/L1	L1MC4	DF01998779	0	0	0	0	0	0	0	0	0	0	-1	1	0	0	0	0	0	0	1	0	1	0	0	4	3	1	19
17	58000730	58001010	DNA/TcMar-Tigger	MER46C	DF02104899	0	0	0	0	0	0	0	0	0	0	0	1	0	0	0	0	0	0	1	-1	1	0	0	4	3	1	19
6	27672003	27672297	SINE/Alu	AluSx3	DF04303712	0	0	0	0	0	-1	0	0	0	0	0	1	0	0	0	0	0	0	1	0	1	0	0	4	3	1	19
3	31652259	31653518	LINE/L1	L1MA4A	DF03257136	0	0	0	0	-1	0	0	0	0	0	0	1	0	0	0	0	0	0	0	1	0	0	1	4	3	1	19
11	20070960	20074942	LINE/L1	L1PA7	DF00772632	0	0	0	0	0	1	0	0	0	0	0	-1	0	0	0	0	0	0	1	1	0	0	0	4	3	1	19
5	88975542	88975683	scRNA	BC200	DF04067124	0	0	0	0	0	-1	0	0	0	0	0	0	1	0	0	0	0	0	1	0	1	0	0	4	3	1	19
13	32525697	32526614	LINE/L1	L1MC5a	DF01297334	1	0	0	0	-1	1	0	0	0	0	0	0	0	0	0	0	0	0	0	1	0	0	0	4	3	1	19
15	42180805	42181568	LINE/L1	L1MB2	DF01660314	0	0	0	0	-1	1	0	0	0	0	0	0	0	0	1	0	0	0	0	1	0	0	0	4	3	1	19
19	49817642	49817947	SINE/Alu	AluSx1	DF02421392	0	0	0	0	0	-1	0	0	0	0	0	0	1	0	0	0	0	0	1	0	1	0	0	4	3	1	19
1	169381131	169381790	LINE/L1	L1M5	DF00319527	1	0	0	0	0	-1	0	0	0	0	0	1	0	0	0	0	0	0	0	1	0	0	0	4	3	1	19
11	11910518	11913487	LINE/L1	L1MD2	DF00755735	0	0	0	0	-1	1	0	0	0	0	0	0	0	0	0	0	0	0	1	1	0	0	0	4	3	1	19
4	82822150	82822518	LINE/L2	L2a	DF03726813	1	0	0	0	-1	1	0	0	0	0	0	0	0	0	0	0	0	0	0	0	0	0	1	4	3	1	19
6	27721119	27721201	tRNA	tRNA-Leu-TTA	DF04303853	0	0	0	0	0	-1	0	0	0	0	0	0	1	0	0	0	0	0	1	0	1	0	0	4	3	1	19
21	34110616	34111260	DNA/TcMar-Tigger	Tigger17a	DF03083435	0	0	1	0	0	0	0	0	0	0	0	0	0	0	0	0	0	0	0	-1	1	0	1	4	3	1	19
21	34108802	34109827	LINE/L1	L1MC4	DF03083431	0	0	0	0	0	1	0	0	0	0	0	0	0	0	0	0	0	0	0	-1	1	0	1	4	3	1	19
8	28170723	28174433	LINE/L1	L1MB4	DF04919037	0	0	1	0	0	1	0	0	0	0	0	0	0	0	1	0	0	0	0	-1	0	0	0	4	3	1	19
6	73513195	73513468	LINE/L2	L2b	DF04388472	0	0	0	0	-1	0	0	0	0	0	0	1	1	0	0	0	0	0	0	0	1	0	0	4	3	1	19
12	66139337	66140620	LINE/L1	L1MEc	DF01119377	0	0	0	0	-1	1	0	0	0	0	0	0	0	0	0	0	0	0	1	1	0	0	0	4	3	1	19
10	31340569	31341773	LINE/L2	L2c	DF00538276	0	0	1	0	0	1	0	0	0	0	0	-1	0	0	0	0	0	0	0	1	0	0	0	4	3	1	19
12	1941771	1945452	LINE/L1	L1PA10	DF01000762	0	0	0	0	-1	1	0	0	0	0	0	1	0	0	0	0	0	0	1	0	0	0	0	4	3	1	19
1	146370101	146370175	tRNA	tRNA-Asn-AAC	DF00271519	0	0	0	0	0	-1	0	0	0	0	0	0	1	0	0	0	0	0	1	0	1	0	0	4	3	1	19
11	33725696	33729676	LINE/L1	L1PA7	DF00799049	0	0	1	0	0	1	0	0	0	-1	0	0	0	0	0	0	0	0	0	1	0	0	0	4	3	1	19
8	11170131	11170724	LINE/L1	L1MB7	DF04884838	0	0	1	0	0	0	0	0	0	-1	0	0	0	0	1	0	0	0	0	1	0	0	0	4	3	1	19
13	33896741	33901832	LINE/L1	L1MA4	DF01300033	0	0	0	0	0	-1	0	0	0	0	0	1	0	0	0	0	0	0	1	0	1	0	0	4	3	1	19
12	47623859	47630306	LINE/L1	L1PA8	DF01081276	0	0	1	0	0	0	0	0	0	0	0	1	0	0	0	0	0	0	0	-1	0	0	1	4	3	1	19
6	80413301	80420621	LINE/L1	L1PA13	DF04400010	0	0	0	0	0	1	0	0	0	0	0	0	0	0	0	0	0	0	1	-1	1	0	0	4	3	1	19
7	139023818	139024118	LINE/L2	L2	DF04826814	-1	0	1	0	0	1	0	0	0	0	0	0	0	0	0	0	1	0	0	0	0	0	0	4	3	1	19
18	26238592	26244703	LINE/L1	L1PA5	DF02202385	0	0	1	0	0	0	0	0	0	0	0	0	0	0	0	0	0	0	0	-1	1	0	1	4	3	1	19
14	20480289	20480602	SINE/Alu	AluJb	DF01445219	0	0	0	0	-1	0	0	0	0	0	0	1	1	0	0	0	0	0	0	0	1	0	0	4	3	1	19
2	210091571	210093121	LINE/L1	L1MEd	DF02872370	0	0	0	0	0	0	0	0	0	0	0	1	0	0	0	0	0	0	0	-1	1	0	1	4	3	1	19
X	103677900	103678437	LINE/L2	L2c	DF05779152	1	0	0	0	-1	0	0	0	0	0	0	0	0	0	0	0	0	0	0	1	0	0	1	4	3	1	19
1	68087597	68093705	LINE/L1	L1PA6	DF00164898	0	0	0	0	0	1	0	0	0	0	0	1	0	0	0	-1	0	0	0	0	1	0	0	4	3	1	19
6	38128339	38131342	LINE/L1	L1PB1	DF04327578	0	0	1	0	0	1	0	0	0	-1	0	0	0	0	0	0	0	0	0	1	0	0	0	4	3	1	19
1	110945925	110946523	LINE/L1	L1MB8	DF00243230	0	0	0	0	0	-1	0	0	0	0	0	1	0	0	0	1	0	0	0	1	0	0	0	4	3	1	19
4	775489	775801	SINE/Alu	AluSx1	DF03574198	1	0	1	0	0	0	0	0	0	0	-1	0	0	0	0	0	0	0	0	1	0	0	0	4	3	1	19
X	44983418	44989548	LINE/L1	L1PA4	DF05684980	0	0	0	0	0	1	0	0	0	-1	0	0	0	0	0	0	0	0	1	0	1	0	0	4	3	1	19
2	203304655	203304947	SINE/Alu	AluJb	DF02823464	1	0	0	0	0	1	0	0	0	0	0	-1	0	0	0	0	0	0	0	1	0	0	0	4	3	1	19
22	28798301	28798607	SINE/Alu	AluSx1	DF03138794	1	0	0	0	0	0	0	0	0	0	-1	0	0	0	0	0	0	0	1	1	0	0	0	4	3	1	19
17	61996484	61996927	LINE/L2	L2a	DF02114727	0	0	0	0	0	0	0	0	0	-1	0	1	0	0	0	0	0	0	1	1	0	0	0	4	3	1	19
8	117931907	117932818	DNA/hAT-Charlie	Charlie29b	DF05082887	0	0	0	0	0	1	0	0	0	-1	0	0	0	0	0	0	0	0	0	1	0	0	1	4	3	1	19
10	87897803	87903982	LINE/L1	L1PA6	DF00642827	0	0	0	0	0	1	0	0	0	-1	0	0	0	0	0	0	0	0	1	1	0	0	0	4	3	1	19
9	5782050	5783959	LINE/L1	L1PA7	DF05152972	0	0	1	0	0	1	0	0	0	0	0	0	0	0	0	0	0	0	1	-1	0	0	0	4	3	1	19
1	143735919	143735993	tRNA	tRNA-Asn-AAC	DF00266166	0	0	0	0	0	-1	0	0	0	0	0	0	1	0	0	0	0	0	1	0	1	0	0	4	3	1	19
17	59651479	59653150	DNA/TcMar-Tigger	Tigger1	DF02109269	0	0	1	0	0	0	0	0	0	-1	0	0	0	0	0	0	0	0	0	1	1	0	0	4	3	1	19
1	146038045	146038114	tRNA	tRNA-His-CAY	DF00270894	0	0	1	0	0	1	0	0	0	0	0	-1	1	0	0	0	0	0	0	0	0	0	0	4	3	1	19
22	38502130	38502427	SINE/Alu	AluSx	DF03164633	0	0	0	0	0	1	0	0	0	0	0	-1	0	0	1	0	0	0	0	1	0	0	0	4	3	1	19
7	23528668	23528826	SINE/Alu	AluSg	DF04605158	0	0	0	0	0	1	0	0	0	0	-1	0	0	0	0	0	0	0	0	1	0	0	1	4	3	1	19
2	46577847	46578377	LINE/L1	L1M5	DF02538057	1	0	1	0	0	-1	0	0	0	0	0	0	0	0	0	0	0	0	0	1	0	0	0	4	3	1	19
1	41176265	41182360	LINE/L1	L1PA4	DF00101118	0	0	1	0	0	1	0	0	0	0	0	-1	0	0	0	0	0	0	0	1	0	0	0	4	3	1	19
4	76958200	76958550	LTR/ERVL	LTR16E2	DF03716349	0	0	0	0	0	1	0	0	0	0	0	-1	0	0	0	0	0	0	0	1	0	0	1	4	3	1	19
21	34116590	34117040	LTR/ERVK	LTR22A	DF03083452	0	0	1	0	0	0	0	0	0	0	0	0	0	0	0	0	0	0	0	-1	1	0	1	4	3	1	19
7	112868214	112874638	LINE/L1	L1PA17	DF04777532	0	0	0	0	0	1	0	0	0	-1	0	0	0	0	0	0	0	0	1	1	0	0	0	4	3	1	19
19	57298768	57299210	LINE/L1	L1M2	DF02441319	1	0	1	0	0	1	0	0	0	-1	0	0	0	0	0	0	0	0	0	0	0	0	0	4	3	1	19
19	57297660	57298465	LINE/L1	L1M2	DF02441317	1	0	1	0	0	1	0	0	0	-1	0	0	0	0	0	0	0	0	0	0	0	0	0	4	3	1	19
4	102789037	102790645	LINE/L1	L1MB5	DF03762372	0	0	1	0	-1	0	0	0	0	0	0	1	0	0	0	0	0	0	1	0	0	0	0	4	3	1	19
17	38861414	38861469	DNA/hAT-Charlie	Charlie1b	DF02060331	0	0	0	0	0	-1	0	0	0	0	0	0	0	0	0	0	0	0	1	1	1	0	0	4	3	1	19
16	87864595	87865066	LTR/ERVK	LTR22B	DF01971589	0	0	1	0	0	0	0	0	0	0	0	1	0	0	0	0	0	0	-1	1	0	0	0	4	3	1	19
6	31352056	31353174	LINE/L2	L2a	DF04311319	0	0	0	0	-1	0	0	0	0	0	0	1	1	0	0	0	0	0	0	1	0	0	0	4	3	1	19
5	37650967	37657453	LINE/L1	L1PA7	DF03979727	0	0	0	0	0	0	0	0	0	-1	0	1	0	0	0	0	0	0	1	1	0	0	0	4	3	1	19
15	44571199	44571447	LINE/L2	L2b	DF01665943	0	0	0	0	-1	0	0	0	0	0	0	1	0	0	0	0	0	0	0	0	1	0	1	4	3	1	19
22	41284593	41284870	SINE/Alu	AluJb	DF03172079	1	0	0	0	0	0	0	1	0	0	0	-1	0	0	0	0	0	0	0	0	1	0	0	4	3	1	19
7	139419140	139419415	LINE/L2	L2d	DF04827823	0	0	0	0	1	0	1	0	0	0	0	-1	0	0	0	0	0	0	0	1	0	0	0	4	3	1	19
20	31551181	31551692	LTR/ERVL-MaLR	MLT1L	DF02955817	1	0	1	0	0	0	0	0	0	0	0	-1	0	0	0	0	0	0	0	1	0	0	0	4	3	1	19
1	244406409	244407141	DNA/TcMar-Tigger	Tigger7	DF00502438	0	0	1	0	0	0	0	0	0	0	0	1	0	0	0	0	0	0	0	-1	1	0	0	4	3	1	19
1	244401505	244402615	LINE/L1	L1M4	DF00502432	0	0	1	0	0	0	0	0	0	0	0	1	0	0	0	0	0	0	0	-1	1	0	0	4	3	1	19
10	31333467	31335025	LINE/L1	L1ME3E	DF00538266	0	0	1	0	0	1	0	0	0	0	0	-1	0	0	0	0	0	0	0	1	0	0	0	4	3	1	19
4	76983048	76983641	LTR/ERVL-MaLR	MLT1E3	DF03716392	0	0	0	0	0	1	0	0	0	0	0	-1	0	0	0	0	0	0	0	1	0	0	1	4	3	1	19
8	127902430	127904178	LINE/L1	L1PA16	DF05105829	0	0	1	0	0	1	0	0	0	0	0	0	0	0	0	0	0	0	1	-1	0	0	0	4	3	1	19
7	43633766	43634433	LINE/L1	L1ME2	DF04644449	1	0	0	0	-1	0	0	0	0	0	0	0	0	0	0	0	0	0	0	1	0	0	1	4	3	1	19
1	161531113	161531184	tRNA	tRNA-Gly-GGA	DF00303768	0	0	0	0	0	1	0	0	0	1	0	0	0	0	0	0	0	0	1	-1	0	0	0	4	3	1	19
3	41227732	41229692	LINE/L1	L1PA15	DF03276776	0	0	0	0	-1	1	0	0	0	0	0	0	0	0	0	0	0	0	0	1	1	0	0	4	3	1	19
3	14679849	14680665	LINE/L1	L1MB8	DF03225258	1	0	0	0	0	-1	0	0	0	0	0	0	0	0	0	0	0	0	0	1	1	0	0	4	3	1	19
1	88782146	88783569	LINE/L1	L1MEc	DF00201960	0	0	0	0	0	0	0	0	0	-1	0	1	0	0	0	0	0	0	0	1	1	0	0	4	3	1	19
4	76972040	76972320	LINE/L1	L1M5	DF03716373	0	0	0	0	0	1	0	0	0	0	0	-1	0	0	0	0	0	0	0	1	0	0	1	4	3	1	19
10	87749820	87750123	LTR/ERV1	LTR49	DF00642557	0	0	0	0	-1	0	0	0	0	0	0	1	1	0	0	0	0	0	0	0	1	0	0	4	3	1	19
6	28735429	28735500	tRNA	tRNA-Ala-GCA	DF04305950	0	0	0	0	0	-1	0	0	0	0	0	0	1	0	0	0	0	0	0	1	1	0	0	4	3	1	19
10	68528118	68528338	SINE/Alu	AluSx1	DF00601569	0	0	0	0	0	-1	0	0	0	0	0	1	0	0	0	0	0	0	1	0	1	0	0	4	3	1	19
4	102675985	102678056	DNA/hAT-Charlie	Charlie1	DF03762152	0	0	0	0	0	1	0	0	0	0	0	1	0	0	0	0	0	0	1	-1	0	0	0	4	3	1	19
2	190955138	190957087	LINE/L1	L1PA7	DF02799931	0	0	-1	0	0	0	0	0	0	0	0	1	0	0	0	0	0	0	0	0	1	0	1	4	3	1	19
3	128680066	128680347	SINE/Alu	AluSp	DF03436317	0	0	0	0	0	-1	0	0	0	0	0	1	0	0	0	0	0	0	1	0	1	0	0	4	3	1	19
14	30907849	30909057	LINE/L2	L2a	DF01463782	0	0	1	0	0	0	0	0	0	-1	0	1	0	0	0	0	0	0	0	1	0	0	0	4	3	1	19
12	22651986	22653739	LINE/L1	L1MB2	DF01040858	0	0	0	0	-1	0	0	0	0	0	0	0	0	0	0	0	0	0	1	1	0	0	1	4	3	1	19
12	22648055	22649754	LINE/L1	L1MC1	DF01040851	0	0	0	0	0	0	0	0	0	-1	0	0	0	0	0	0	0	0	1	1	0	0	1	4	3	1	19
9	92258312	92258604	SINE/Alu	AluSq2	DF05292603	0	0	1	0	0	-1	0	0	0	0	0	0	0	0	0	0	0	0	0	1	1	0	0	4	3	1	19
10	87937772	87939169	DNA/TcMar-Tigger	Tigger10	DF00642885	0	0	0	0	0	1	0	0	0	-1	0	0	0	0	0	0	0	0	1	1	0	0	0	4	3	1	19
14	30663953	30669086	LINE/L1	L1P2	DF01463282	1	0	0	0	0	1	0	0	0	0	0	0	0	0	0	0	0	0	0	1	0	0	-1	4	3	1	19
4	108653879	108654844	LINE/L2	L2a	DF03772189	1	0	1	0	0	0	0	0	0	0	-1	0	0	0	0	0	0	0	0	1	0	0	0	4	3	1	19
1	85257143	85257432	LINE/L2	L2c	DF00195557	1	0	0	0	-1	0	0	0	0	0	0	0	0	0	0	0	0	0	1	1	0	0	0	4	3	1	19
X	102871179	102877321	LINE/L1	L1PA4	DF05777465	0	0	1	0	0	0	0	0	0	-1	0	0	0	0	0	0	0	0	1	1	0	0	0	4	3	1	19
13	49164871	49166810	LINE/L1	L1P2	DF01329649	0	0	0	0	0	0	0	0	0	-1	0	0	0	0	0	0	0	0	1	1	0	0	1	4	3	1	19
12	105171764	105172695	LINE/L1	L1ME3D	DF01196325	0	0	1	0	-1	0	0	0	0	0	0	0	0	0	0	0	0	0	1	1	0	0	0	4	3	1	19
2	178437206	178437848	LINE/L1	L1ME4b	DF02779321	0	0	1	0	0	1	1	0	0	0	0	-1	0	0	0	0	0	0	0	0	0	0	0	4	3	1	19
6	108618410	108619151	LINE/L1	L1ME1	DF04449106	0	0	1	0	0	1	0	0	0	-1	0	0	0	0	0	0	0	0	0	0	0	0	1	4	3	1	19
19	39985773	39987259	LINE/L1	L1MA4A	DF02393631	0	0	0	0	0	0	0	0	0	0	0	1	0	0	0	0	0	0	1	-1	1	0	0	4	3	1	19
12	103948468	103948947	LINE/L1	L1MD3	DF01193338	1	0	0	0	0	0	-1	0	0	0	0	0	1	0	0	0	0	0	0	1	0	0	0	4	3	1	19
1	151456043	151456667	DNA/hAT-Charlie	Charlie1a	DF00282649	0	0	0	0	0	1	0	0	0	0	0	-1	0	0	0	0	0	0	1	1	0	0	0	4	3	1	19
17	2626853	2630855	LINE/L1	L1PBa	DF01984621	0	0	1	0	0	1	0	0	0	-1	0	0	0	0	0	0	0	0	0	1	0	0	0	4	3	1	19
21	32741900	32742245	LINE/L1	L1ME1	DF03080361	0	0	0	0	-1	0	0	0	0	0	0	0	0	0	1	0	0	0	0	1	0	0	1	4	3	1	19
5	112866420	112866629	SINE/Alu	AluJb	DF04106369	1	0	0	0	-1	0	0	1	0	0	0	0	0	0	0	0	0	0	0	1	0	0	0	4	3	1	19
5	150884260	150887073	LINE/L1	L1PREC2	DF04179966	0	0	0	0	0	-1	0	0	0	0	0	1	0	0	1	0	0	0	1	0	0	0	0	4	3	1	19
5	39034330	39040476	LINE/L1	L1PA4	DF03982436	0	0	0	0	0	1	0	0	0	-1	0	0	0	0	0	0	0	0	1	1	0	0	0	4	3	1	19
2	26301464	26304444	LTR/ERV1	HERV15-int	DF02496246	0	0	-1	0	0	0	0	0	0	0	0	1	0	0	0	0	0	0	1	0	1	0	0	4	3	1	19
1	173684303	173688447	LTR/ERV1	HERVIP10FH-int	DF00327398	0	0	-1	0	0	0	0	0	0	0	0	1	0	0	0	0	0	0	1	0	1	0	0	4	3	1	19
10	73219105	73220557	LINE/L1	L1MB7	DF00613205	0	0	-1	0	0	0	0	0	0	0	0	1	0	0	0	0	0	0	1	0	0	0	1	4	3	1	19
2	121546323	121549723	LINE/L1	L1PA14	DF02676353	0	0	0	0	0	1	0	0	0	-1	0	0	0	0	0	0	0	0	1	1	0	0	0	4	3	1	19
11	88257189	88263865	LINE/L1	L1PA14	DF00906635	0	0	0	0	0	0	0	0	0	0	0	1	0	0	0	0	0	0	1	-1	0	0	1	4	3	1	19
6	27097306	27097387	tRNA	tRNA-Ser-AGY	DF04302269	0	0	0	0	0	-1	0	0	0	0	0	0	1	0	0	0	0	0	1	0	1	0	0	4	3	1	19
21	45270401	45275874	LINE/L1	L1PB1	DF03104917	0	0	0	0	-1	1	0	0	0	0	0	0	0	0	0	0	0	0	0	1	1	0	0	4	3	1	19
8	100703363	100703619	DNA/hAT-Charlie	MER58A	DF05050831	0	0	0	0	-1	0	0	0	0	0	1	1	0	0	0	0	0	0	0	0	1	0	0	4	3	1	19
8	118015681	118016109	LTR/ERVL-MaLR	MLT1C2	DF05083079	0	0	0	0	0	1	0	0	0	0	0	-1	0	0	0	0	0	0	0	1	0	0	1	4	3	1	19
7	130909811	130909899	LINE/L2	L2c	DF04810113	0	0	1	0	0	1	0	0	0	0	0	-1	0	0	0	0	0	0	0	1	0	0	0	4	3	1	19
20	34100315	34100652	LTR/ERVL	MER21C	DF02963454	1	0	1	0	0	0	0	0	0	0	0	0	0	0	0	0	0	0	-1	1	0	0	0	4	3	1	19
4	17860563	17862134	LTR/ERVL-MaLR	THE1B-int	DF03609775	0	0	1	0	0	0	0	0	0	0	0	1	0	0	0	0	0	0	1	-1	0	0	0	4	3	1	19
2	62144629	62145528	LTR/ERV1	MER4D0	DF02568132	0	0	0	0	-1	0	0	0	0	0	0	1	0	0	0	0	0	0	1	1	0	0	0	4	3	1	19
19	43164109	43164401	SINE/Alu	AluSq4	DF02401601	0	0	0	0	0	-1	0	0	0	0	1	1	1	0	0	0	0	0	0	0	0	0	0	4	3	1	19
3	139404563	139410741	LINE/L1	L1PA6	DF03458576	0	0	-1	0	0	1	0	0	0	0	0	0	0	0	0	0	0	0	1	1	0	0	0	4	3	1	19
19	40044103	40045323	LINE/L1	L1M2	DF02393750	0	0	0	0	-1	0	0	0	0	0	0	0	0	0	0	0	0	0	1	1	1	0	0	4	3	1	19
1	78646790	78648317	LTR/ERVL-MaLR	THE1C-int	DF00184037	0	0	0	1	0	-1	0	0	0	0	0	0	0	0	0	1	0	0	0	1	0	0	0	4	3	1	19
6	89083301	89083653	LINE/L1	L1PA16	DF04414957	0	0	0	1	-1	1	0	0	0	0	0	1	0	0	0	0	0	0	0	0	0	0	0	4	3	1	19
2	71370690	71371778	LINE/L1	L1MA2	DF02587020	0	0	-1	0	0	1	0	0	0	0	0	0	0	0	0	0	0	0	1	1	0	0	0	4	3	1	19
9	20539720	20541359	LTR/ERVL-MaLR	THE1D-int	DF05179623	0	0	1	0	0	0	0	0	0	0	0	0	0	0	0	0	0	0	1	1	-1	0	0	4	3	1	19
16	58540098	58540850	LINE/L1	L1MC4	DF01906230	0	0	0	0	-1	0	0	0	0	0	0	0	0	0	0	0	0	0	1	1	1	0	0	4	3	1	19
7	43599065	43600465	DNA/MULE-MuDR	Ricksha_c	DF04644385	0	0	0	0	0	0	0	0	0	-1	0	0	0	0	0	0	0	0	0	1	1	0	1	4	3	1	19
6	18174471	18177538	LINE/L1	L1PB1	DF04284619	0	0	0	0	0	0	0	0	0	-1	0	1	0	0	0	0	0	0	0	1	1	0	0	4	3	1	19
1	39547765	39548509	LINE/L2	L2c	DF00096624	0	0	0	0	-1	1	0	0	0	0	0	1	0	0	0	0	0	0	0	0	0	0	1	4	3	1	19
5	131401967	131403278	LINE/L1	L1MB2	DF04138169	0	0	1	0	0	0	0	0	0	0	0	1	0	0	0	0	0	0	0	-1	0	0	1	4	3	1	19
8	118054975	118055538	LINE/L1	L1ME1	DF05083167	0	0	0	0	0	1	0	0	0	-1	0	0	0	0	0	0	0	0	0	1	0	0	1	4	3	1	19
7	135138626	135142138	LINE/L1	L1PA15	DF04818671	0	0	0	0	-1	0	0	0	0	0	0	1	0	0	0	0	0	0	0	0	1	0	1	4	3	1	19
9	111637518	111638111	LINE/L2	L2c	DF05333891	1	0	1	0	0	-1	0	0	0	0	0	0	0	0	0	0	0	0	0	0	1	0	0	4	3	1	19
19	57299514	57299908	LINE/L1	L1M2	DF02441321	1	0	1	0	0	1	0	0	0	-1	0	0	0	0	0	0	0	0	0	0	0	0	0	4	3	1	19
3	9390876	9391259	DNA/TcMar-Tigger	Tigger1	DF03212240	1	0	0	0	0	-1	0	1	0	0	0	0	0	0	0	0	0	0	0	1	0	0	0	4	3	1	19
[truncated: 102,031 more rows]
